# Supplementary material for: Enantioconvergent Cu-catalysed N-alkylation of aliphatic amines
Source: Springer Nature journal article supplement (doi:10.1038/s41586-023-05950-8), 2023-03-20
Supplement: MOESM1 [file 41586_2023_5950_MOESM1_ESM.pdf]

---

## Supplementary information

---

# Enantioconvergent Cu-catalysed *N*-alkylation of aliphatic amines

---

In the format provided by the  
authors and unedited

# Supplementary Information for

## Enantioconvergent Cu-catalysed *N*-alkylation of aliphatic amines

Ji-Jun Chen<sup>1,3</sup>, Jia-Heng Fang<sup>1,3</sup>, Xuan-Yi Du<sup>1,3</sup>, Jia-Yong Zhang<sup>1</sup>, Jun-Qian Bian<sup>1</sup>, Fu-Li Wang<sup>1</sup>, Cheng Luan<sup>2</sup>, Wei-Long Liu<sup>1</sup>, Ji-Ren Liu<sup>1</sup>, Xiao-Yang Dong<sup>1</sup>, Zhong-Liang Li<sup>2</sup>, Qiang-Shuai Gu<sup>2</sup>, Zhe Dong<sup>1</sup>, and Xin-Yuan Liu<sup>1</sup> ✉  
Correspondence to: [liuxy3@sustech.edu.cn](mailto:liuxy3@sustech.edu.cn)

### Table of contents

|                                                                                 |      |
|---------------------------------------------------------------------------------|------|
| 1. Supplementary tables for experiments .....                                   | S1   |
| 2. Supplementary figures for experiments.....                                   | S26  |
| 3. General information .....                                                    | S48  |
| 4. Synthesis of ligand.....                                                     | S49  |
| 5. Synthesis of $\alpha$ -carbonyl alkyl chloride substrates.....               | S51  |
| 6. Enantioconvergent <i>N</i> -alkylation of aliphatic amines and ammonia ..... | S70  |
| 7. Procedure for synthetic applications .....                                   | S145 |
| 8. Mechanistic studies .....                                                    | S171 |
| 9. References .....                                                             | S204 |
| 10. NMR spectra.....                                                            | S206 |
| 11. HPLC spectra .....                                                          | S427 |

## 1. Supplementary tables for experiments

### Brief summary of condition optimizations

**Benzylic primary amine A1 with  $\alpha$ -methyl secondary alkyl chloride E1:** We started the condition optimization using  $\text{Cu}(\text{CH}_3\text{CN})_4\text{PF}_6$  and **L\*1** as the catalyst in  $\text{CH}_3\text{CN}$  at 45 °C. The initial screening of inorganic base additives indicated  $\text{Cs}_2\text{CO}_3$  as the best (Supplementary Table 1). Next, the copper salt was varied and  $\text{CuI}$  performed the best (Supplementary Table 2). The subsequent solvent screening revealed 1,4-dioxane as the optimal one (Supplementary Table 3). Then a series of ligands were strategically tested and **L\*4** stood out to provide the highest yield with the best enantioselectivity (Supplementary Table 4). Further investigations on the amine-to-alkyl chloride ratio (Supplementary Table 5), copper-to-ligand ratio (Supplementary Table 6), and the stoichiometry of base additives (Supplementary Table 7) led to the optimal conditions. Additional control experiments indicated the significant formation of side products **1'** or **1''** in the absence of  $\text{CuI}$  or **L\*4** or both (Supplementary Table 8). In addition, the base-promoted non-enantioselective N-alkylation was observed, which was promoted by copper catalysts in the absence of **L\*4** (Supplementary Table 8).

**Non-benzylic primary amine A13 with  $\alpha$ -methyl secondary alkyl chloride E1:** This reaction in a single solvent generally gave low to moderate yield with moderate to excellent enantioselectivity (Supplementary Table 9). Thus, mixed solvents composed of NMP and EtOAc, of which the former gave the highest yield and the latter the highest enantioselectivity, were investigated (Supplementary Table 10). An NMP-to-EtOAc ratio of 3:2 was found to deliver good yield with suboptimal enantioselectivity. Further ligand screening identified **L\*5** as the best ligand (Supplementary Table 11), providing the N-alkylation product in good yield with excellent enantioselectivity.

**Cyclic secondary amine A55 with  $\alpha$ -methyl secondary alkyl chloride E1:** In this case, **L\*5** performed better than **L\*4** (Supplementary Table 12) and  $\text{CuBH}_4(\text{PPh}_3)_2$  outperformed  $\text{CuI}$  (Supplementary Table 13). The use of mixed solvents of DMF and cyclohexane led to slightly enhanced yield with almost the same enantioselectivity as those obtained in DMF only (Supplementary Table 14).

**Acyclic secondary amine A51 with  $\alpha$ -alkyl secondary alkyl chloride E7:** Due to the increased steric bulkiness of alkyl chlorides, sterically less congested N,N,N-ligand **L\*7** became superior for this reaction (Supplementary Table 16). Among common solvents, benzene delivered slightly better enantioselectivity than 1,4-dioxane while the yield remained comparable (Supplementary Table 17).

**Cyclic secondary amine A89 with  $\alpha$ -alkyl secondary alkyl chloride E7:** In this reaction, **L\*10** afforded slightly higher enantioselectivity than **L\*7** (Supplementary Table 18).

**Benzylic primary amine A1 with  $\alpha$ -aryl secondary alkyl chloride E18:** Various copper salts generally provided moderate yield with good enantioselectivity and  $\text{CuSCN}$  performed the best (Supplementary Table 19). Switching the solvent from 1,4-dioxane to THF marginally enhanced the enantioselectivity albeit with slightly diminished yield (Supplementary Table 20). Replacing the tridentate ligand **L\*4** with the sterically less congested bidentate ligand **L\*8** boosted the reaction efficiency with almost the same enantioselectivity (Supplementary Table 21).

**Benzylic primary amine A1 with tertiary alkyl chloride E22:** The planar tridentate N,N,N-ligand **L\*9** with a sterically more opened catalyst pocket delivered moderate enantioselectivity while the sterically congested ligand **L\*4** failed to induce enantioselectivity under otherwise the same conditions (Supplementary Table 22). Further changing the solvent from 1,4-dioxane to MTBE greatly enhanced the enantioselectivity. The use of  $\text{K}_3\text{PO}_4$  in place of  $\text{Cs}_2\text{CO}_3$  provided

slightly superior enantioselectivity but with greatly diminished yield. Interestingly, the addition of an additional catalytic amount of  $\text{Cs}_2\text{CO}_3$  rescued the reaction while slightly boosting the enantioselectivity.



Reaction scheme showing the synthesis of **1** from **A1** and **E1** using **L\*1** (15 mol%) and Cu(CH<sub>3</sub>CN)<sub>4</sub>PF<sub>6</sub> (10 mol%) in CH<sub>3</sub>CN (1.0 mL) at 45 °C, with base (3.0 equiv.). The reaction yields **1** (a chiral amide), **1'** (an enamine), and **1''** (a cyclic product).

Reaction conditions: **A1** (0.050 mmol), **E1** (1.5 equiv.), Cu(CH<sub>3</sub>CN)<sub>4</sub>PF<sub>6</sub> (10 mol%), **L\*1** (15 mol%), and base (3.0 equiv.) in CH<sub>3</sub>CN (1.0 mL) at 45 °C for 72 h under argon. The yields are based on <sup>1</sup>H NMR analysis of the crude product using 1,3,5-trimethoxybenzene as an internal standard. The E.e. values are based on HPLC analysis.

**Supplementary Table 2** | Reaction condition optimization with benzylic primary amine **A1** and  $\alpha$ -methyl secondary alkyl chloride **E1**: screening of different copper salts

| Entry | [Cu]                                                | Yield (%) |           |            | E.e. (%) |
|-------|-----------------------------------------------------|-----------|-----------|------------|----------|
|       |                                                     | <b>1</b>  | <b>1'</b> | <b>1''</b> |          |
| 1     | Cu(CH <sub>3</sub> CN) <sub>4</sub> PF <sub>6</sub> | 44        | 44        | 24         | 67       |
| 2     | CuBH <sub>4</sub> (PPh <sub>3</sub> ) <sub>2</sub>  | 63        | 34        | 15         | 84       |
| 3     | CuBrSMe <sub>2</sub>                                | 58        | 37        | 21         | 82       |
| 4     | CuI                                                 | 69        | 47        | 13         | 85       |
| 5     | CuCN                                                | 53        | 24        | 30         | 75       |
| 6     | CuTc                                                | 52        | 38        | 22         | 80       |
| 7     | IMesCuCl                                            | 23        | trace     | 56         | 3        |
| 8     | CuOAc                                               | 40        | 39        | 22         | 73       |
| 9     | CuMes                                               | 68        | 47        | 10         | 85       |
| 10    | CuBr <sub>2</sub>                                   | 56        | 26        | 29         | 78       |
| 11    | CuCl <sub>2</sub>                                   | 58        | 32        | 25         | 79       |
| 12    | CuF <sub>2</sub>                                    | 55        | 31        | 25         | 78       |
| 13    | Cu(acac) <sub>2</sub>                               | 37        | 41        | 19         | 71       |
| 14    | Cu(OTf) <sub>2</sub>                                | 67        | 38        | 22         | 77       |
| 15    | Cu(OAc) <sub>2</sub>                                | 47        | 37        | 19         | 82       |
| 16    | Cu <sub>3</sub> (PO <sub>4</sub> ) <sub>2</sub>     | 34        | 18        | 42         | 49       |

Reaction conditions: **A1** (0.050 mmol), **E1** (1.5 equiv.), [Cu] (10 mol%), **L\*1** (15 mol%), and Cs<sub>2</sub>CO<sub>3</sub> (3.0 equiv.) in CH<sub>3</sub>CN (1.0 mL) at 45 °C for 72 h under argon. The yields are based on <sup>1</sup>H NMR analysis of the crude product using 1,3,5-trimethoxybenzene as an internal standard. The E.e. values are based on HPLC analysis.

Reaction conditions: **A1** (0.050 mmol), **E1** (1.5 equiv.), CuI (10 mol%), **L\*1** (15 mol%), and Cs<sub>2</sub>CO<sub>3</sub> (3.0 equiv.) in anhydrous solvent (1.0 mL) at 45 °C for 72 h under argon. The yields are based on <sup>1</sup>H NMR analysis of the crude product using 1,3,5-trimethoxybenzene as an internal standard. The E.e. values are based on HPLC analysis. <sup>a</sup>At room temperature.

**Supplementary Table 4** | Reaction condition optimization with benzylic primary amine **A1** and  $\alpha$ -methyl secondary alkyl chloride **E1**: screening of different ligands

Reaction conditions: **A1** (0.050 mmol), **E1** (1.5 equiv.), CuI (10 mol%), **L\*** (15 mol%), and Cs<sub>2</sub>CO<sub>3</sub> (3.0 equiv.) in 1,4-dioxane (1.0 mL) at 45 °C for 72 h under argon.

| Entry | <b>L*</b>   | Yield (%) |           |            | E.e. (%) |
|-------|-------------|-----------|-----------|------------|----------|
|       |             | <b>1</b>  | <b>1'</b> | <b>1''</b> |          |
| 1     | <b>L*1</b>  | 68        | 9         | trace      | 87       |
| 2     | <b>L*2</b>  | 69        | 15        | trace      | 86       |
| 3     | <b>L*3</b>  | 62        | 15        | trace      | 81       |
| 4     | <b>L*4</b>  | 98        | trace     | trace      | 92       |
| 5     | <b>L*5</b>  | 97        | trace     | trace      | 84       |
| 6     | <b>L*6</b>  | 77        | trace     | trace      | 74       |
| 7     | <b>L*7</b>  | 92        | 19        | 7          | 85       |
| 8     | <b>L*8</b>  | 74        | trace     | trace      | 88       |
| 9     | <b>L*10</b> | 92        | 22        | trace      | 92       |
| 10    | <b>L*12</b> | 95        | trace     | trace      | 91       |

Reaction conditions: **A1** (0.050 mmol), **E1** (1.5 equiv.), CuI (10 mol%), **L\*** (15 mol%), and Cs<sub>2</sub>CO<sub>3</sub> (3.0 equiv.) in 1,4-dioxane (1.0 mL) at 45 °C for 72 h under argon. The yields are based on <sup>1</sup>H NMR analysis of the crude product using 1,3,5-trimethoxybenzene as an internal standard. The E.e. values are based on HPLC analysis.

**Supplementary Table 5** | Reaction condition optimization with benzylic primary amine **A1** and  $\alpha$ -methyl secondary alkyl chloride **E1**: screening of starting materials loading

| <b>A1</b> | <b>E1</b>   |             | <b>1</b>  | <b>1'</b> | <b>1''</b> |          |
|-----------|-------------|-------------|-----------|-----------|------------|----------|
| Entry     | A1 (equiv.) | E1 (equiv.) | Yield (%) |           |            | E.e. (%) |
|           |             |             | <b>1</b>  | <b>1'</b> | <b>1''</b> |          |
| 1         | 1.0         | 1.5         | 98        | trace     | trace      | 92       |
| 2         | 1.0         | 1.2         | 85        | trace     | trace      | 92       |
| 3         | 1.0         | 1.0         | 70        | trace     | trace      | 92       |
| 4         | 1.2         | 1.0         | 70        | trace     | trace      | 92       |
| 5         | 1.5         | 1.0         | 75        | trace     | trace      | 91       |

Reaction conditions: **A1**, **E1**, CuI (10 mol%), **L\*4** (15 mol%), and Cs<sub>2</sub>CO<sub>3</sub> (3.0 equiv.) in 1,4-dioxane (1.0 mL) at 45 °C for 72 h under argon. The yields are based on <sup>1</sup>H NMR analysis of the crude product using 1,3,5-trimethoxybenzene as an internal standard. The E.e. values are based on HPLC analysis.

**Supplementary Table 6** | Reaction condition optimization with benzylic primary amine **A1** and  $\alpha$ -methyl secondary alkyl chloride **E1**: screening of catalyst loading

| Entry | CuI (x mol %) | L*4 (y mol %) | Yield (%) |       |       | E.e. (%) |
|-------|---------------|---------------|-----------|-------|-------|----------|
|       |               |               | 1         | 1'    | 1''   |          |
| 1     | 10            | 15            | 98        | trace | trace | 92       |
| 2     | 10            | 12            | 95        | trace | trace | 92       |
| 3     | 10            | 10            | 95        | trace | trace | 91       |
| 4     | 7             | 10.5          | 84        | trace | trace | 92       |
| 5     | 5             | 7.5           | 80        | trace | trace | 87       |
| 6     | 2             | 3             | 77        | trace | trace | 83       |

Reaction conditions: **A1** (0.050 mmol), **E1** (1.5 equiv.), CuI, **L\*4**, and Cs<sub>2</sub>CO<sub>3</sub> (3.0 equiv.) in 1,4-dioxane (1.0 mL) at 45 °C for 72 h under argon. The yields are based on <sup>1</sup>H NMR analysis of the crude product using 1,3,5-trimethoxybenzene as an internal standard. The E.e. values are based on HPLC analysis.

**Supplementary Table 7** | Reaction condition optimization with benzylic primary amine **A1** and  $\alpha$ -methyl secondary alkyl chloride **E1**: screening of  $\text{Cs}_2\text{CO}_3$  loading

| <b>A1</b> | <b>E1</b>                           |                                                                                                                                  |              |              |           |
|-----------|-------------------------------------|----------------------------------------------------------------------------------------------------------------------------------|--------------|--------------|-----------|
|           |                                     | $\text{CuI}$ (10 mol%)<br>$\text{L}^*\mathbf{4}$ (15 mol%)<br>$\text{Cs}_2\text{CO}_3$ (x equiv.)<br>1,4-dioxane (1.0 mL), 45 °C |              |              |           |
|           |                                     | <b>1</b>                                                                                                                         | <b>1'</b>    | <b>1''</b>   |           |
| Entry     | $\text{Cs}_2\text{CO}_3$ (x equiv.) | Yield (%)                                                                                                                        |              |              | E.e. (%)  |
|           |                                     | <b>1</b>                                                                                                                         | <b>1'</b>    | <b>1''</b>   |           |
| 1         | 1.0                                 | 60                                                                                                                               | trace        | trace        | 89        |
| 2         | 2.0                                 | 80                                                                                                                               | trace        | trace        | 92        |
| <b>3</b>  | <b>3.0</b>                          | <b>98</b>                                                                                                                        | <b>trace</b> | <b>trace</b> | <b>92</b> |
| 4         | 4.0                                 | 97                                                                                                                               | trace        | trace        | 92        |

Reaction conditions: **A1** (0.050 mmol), **E1** (1.5 equiv.),  $\text{CuI}$  (10 mol%),  $\text{L}^*\mathbf{4}$  (15 mol%), and  $\text{Cs}_2\text{CO}_3$  (x equiv.) in 1,4-dioxane (1.0 mL) at 45 °C for 72 h under argon. The yields are based on  $^1\text{H}$  NMR analysis of the crude product using 1,3,5-trimethoxybenzene as an internal standard. The E.e. values are based on HPLC analysis.

**Supplementary Table 8** | Reaction condition optimization with benzylic primary amine **A1** and  $\alpha$ -methyl secondary alkyl chloride **E1**: variation of reaction parameters

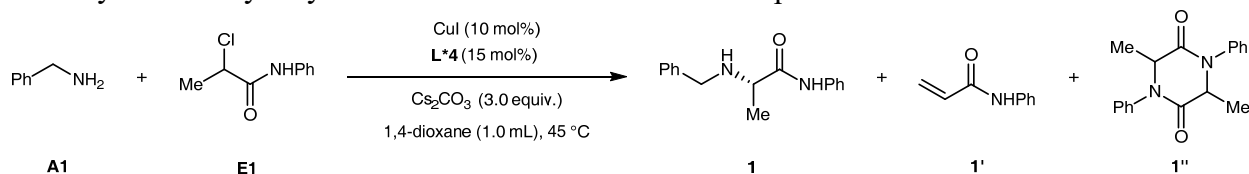

| Entry    | CuI | L*4 | Cs <sub>2</sub> CO <sub>3</sub> | Yield (%) |           |            | E.e. (%)  |
|----------|-----|-----|---------------------------------|-----------|-----------|------------|-----------|
|          |     |     |                                 | <b>1</b>  | <b>1'</b> | <b>1''</b> |           |
| <b>1</b> | ✓   | ✓   | ✓                               | <b>98</b> | trace     | trace      | <b>92</b> |
| 2        | ✓   | ×   | ✓                               | 98        | 35        | trace      | 0         |
| 3        | ×   | ✓   | ✓                               | 39        | trace     | 27         | 0         |
| 4        | ×   | ×   | ✓                               | 40        | trace     | 20         | 0         |
| 5        | ×   | ×   | ×                               | trace     | trace     | trace      | —         |

Reaction conditions: **A1** (0.050 mmol), **E1** (1.5 equiv.), CuI (10 mol%), **L\*4** (15 mol%), and Cs<sub>2</sub>CO<sub>3</sub> (3.0 equiv.) in 1,4-dioxane (1.0 mL) at 45 °C for 72 h under argon. The yields are based on <sup>1</sup>H NMR analysis of the crude product using 1,3,5-trimethoxybenzene as an internal standard. The E.e. values are based on HPLC analysis.



**Supplementary Table 9** | Reaction condition optimization with non-benzylic primary amine **A13** with  $\alpha$ -methyl secondary alkyl chloride **E1**: screening of different solvents

Reaction scheme: **A13** + **E1**  $\xrightarrow[\text{solvent (1.0 mL), rt}]{\text{CuI (10 mol\%), L*4 (15 mol\%), Cs}_2\text{CO}_3 \text{ (3.0 equiv.)}}$  **13** + **1'** + **1''**

| Entry     | Solvent                                  | Yield (%) |              |            | E.e. (%)  |
|-----------|------------------------------------------|-----------|--------------|------------|-----------|
|           |                                          | <b>13</b> | <b>1'</b>    | <b>1''</b> |           |
| 1         | DMF                                      | 40        | 45           | 20         | 81        |
| 2         | DMA                                      | 38        | 52           | 15         | 82        |
| <b>3</b>  | <b>NMP</b>                               | <b>52</b> | <b>47</b>    | <b>9</b>   | <b>85</b> |
| 4         | DMSO                                     | 19        | 5            | 14         | 36        |
| 5         | MTBE                                     | 28        | trace        | 6          | 76        |
| 6         | <i>i</i> Pr <sub>2</sub> O               | 19        | trace        | 8          | 52        |
| 7         | THF                                      | 28        | trace        | 8          | 80        |
| 8         | 1,4-dioxane                              | 45        | trace        | 5          | 89        |
| 9         | DME                                      | 46        | 9            | 13         | 85        |
| 10        | PhH                                      | 27        | trace        | 10         | 83        |
| 11        | PhMe                                     | 28        | trace        | 11         | 85        |
| 12        | PhCF <sub>3</sub>                        | 17        | trace        | 14         | 67        |
| 13        | DCM                                      | 21        | trace        | 14         | 72        |
| 14        | DCE                                      | 12        | trace        | 5          | 62        |
| 15        | CH <sub>3</sub> CN                       | 30        | trace        | 36         | 64        |
| <b>16</b> | <b>EtOAc</b>                             | <b>19</b> | <b>trace</b> | <b>15</b>  | <b>91</b> |
| 17        | <i>n</i> -hexane                         | 55        | trace        | 16         | 59        |
| 18        | cyclohexane                              | 33        | trace        | 10         | 53        |
| 19        | AcO <sup><i>i</i></sup> Pr               | 13        | trace        | 8          | 43        |
| 20        | <sup><i>i</i></sup> PrCO <sub>2</sub> Et | 9         | trace        | 7          | 36        |

Reaction conditions: **A13** (0.050 mmol), **E1** (1.5 equiv.), CuI (10 mol%), **L\*4** (15 mol%), and Cs<sub>2</sub>CO<sub>3</sub> (3.0 equiv.) in anhydrous solvent (1.0 mL) at rt for 96 h under argon. The yields are based on <sup>1</sup>H NMR analysis of the crude product using 1,3,5-trimethoxybenzene as an internal standard. The E.e. values are based on HPLC analysis.

**Supplementary Table 10** | Reaction condition optimization with non-benzylic primary amine **A13** with  $\alpha$ -methyl secondary alkyl chloride **E1**: screening of cosolvents

| <b>A13</b> | <b>E1</b> |            | <b>13</b> | <b>1'</b> | <b>1''</b> |          |
|------------|-----------|------------|-----------|-----------|------------|----------|
| Entry      | NMP (mL)  | EtOAc (mL) | Yield (%) |           |            | E.e. (%) |
|            |           |            | <b>13</b> | <b>1'</b> | <b>1''</b> |          |
| 1          | 1.0       | 0          | 52        | 47        | 9          | 85       |
| 2          | 0         | 1.0        | 19        | trace     | 15         | 91       |
| 3          | 0.7       | 0.35       | 71        | 30        | 9          | 89       |
| 4          | 0.6       | 0.4        | 75        | 25        | 11         | 89       |
| 5          | 0.5       | 0.5        | 65        | 8         | 5          | 90       |
| 6          | 0.4       | 0.6        | 62        | 10        | 7          | 90       |

Reaction conditions: **A13** (0.050 mmol), **E1** (1.5 equiv.), CuI (10 mol%), **L\*4** (15 mol%), and Cs<sub>2</sub>CO<sub>3</sub> (3.0 equiv.) in cosolvent (1.0 mL) at rt for 96 h under argon. The yields are based on <sup>1</sup>H NMR analysis of the crude product using 1,3,5-trimethoxybenzene as an internal standard. The E.e. values are based on HPLC analysis.

**Supplementary Table 11** | Reaction condition optimization with non-benzylic primary amine **A13** with  $\alpha$ -methyl secondary alkyl chloride **E1**: screening of different ligands

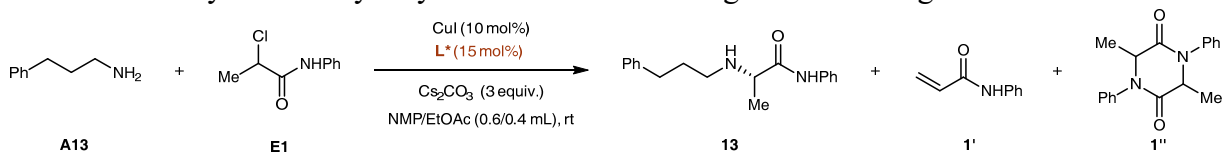

ligand screening

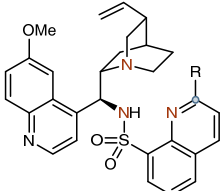

**L\*4** R = H  
**L\*5** R = Me  
**L\*6** R = *i*-Pr  
**L\*13** R = *t*-Bu



**L\*7**



**L\*10**

| Entry | L*   | Yield (%) |    |     | E.e. (%) |
|-------|------|-----------|----|-----|----------|
|       |      | 13        | 1' | 1'' |          |
| 1     | L*4  | 75        | 25 | 11  | 89       |
| 2     | L*5  | 85        | 18 | 5   | 92       |
| 3     | L*6  | 50        | 25 | 11  | 85       |
| 4     | L*13 | 18        | 12 | 25  | 30       |
| 5     | L*7  | 87        | 31 | 5   | 62       |
| 6     | L*10 | 88        | 39 | 6   | 86       |

Reaction conditions: **A13** (0.050 mmol), **E1** (1.5 equiv.),  $\text{CuI}$  (10 mol%),  $\text{L}^*$  (15 mol%), and  $\text{Cs}_2\text{CO}_3$  (3.0 equiv.) in NMP/EtOAc (0.6/0.4 mL) at rt for 96 h under argon. The yields are based on  $^1\text{H}$  NMR analysis of the crude product using 1,3,5-trimethoxybenzene as an internal standard. The E.e. values are based on HPLC analysis.

**Supplementary Table 12** | Reaction condition optimization with cyclic secondary amine **A55** with  $\alpha$ -methyl secondary alkyl chloride **E1**: screening of different ligands

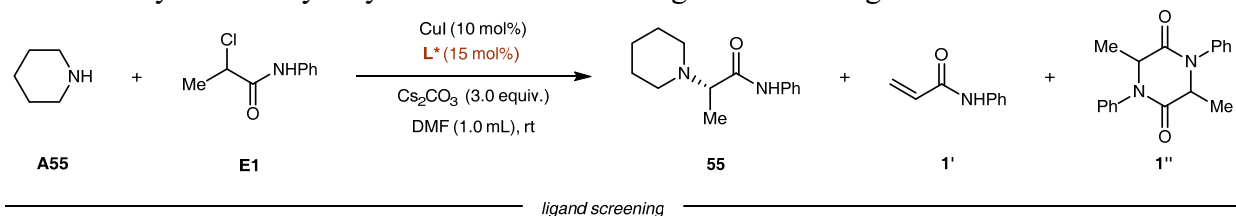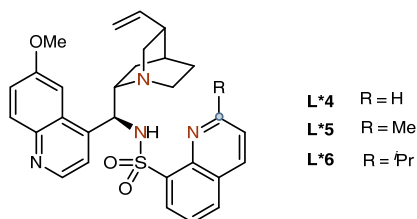

| Entry | L*  | Yield (%) |    |       | E.e. (%) |
|-------|-----|-----------|----|-------|----------|
|       |     | 55        | 1' | 1''   |          |
| 1     | L*4 | 80        | 48 | trace | 75       |
| 2     | L*5 | 80        | 22 | 14    | 89       |
| 3     | L*6 | 80        | 30 | 15    | 69       |

Reaction conditions: **A55** (0.050 mmol), **E1** (1.5 equiv.), CuI (10 mol%), **L\*** (15 mol%), and Cs<sub>2</sub>CO<sub>3</sub> (3.0 equiv.) in DMF (1.0 mL) at rt for 96 h under argon. The yields are based on <sup>1</sup>H NMR analysis of the crude product using 1,3,5-trimethoxybenzene as an internal standard. The E.e. values are based on HPLC analysis.

**Supplementary Table 13** | Reaction condition optimization with cyclic secondary amine **A55** with  $\alpha$ -methyl secondary alkyl chloride **E1**: screening of different copper salts

| <b>A55</b> | <b>E1</b>                                           |           | <b>55</b> | <b>1'</b>  | <b>1''</b> |
|------------|-----------------------------------------------------|-----------|-----------|------------|------------|
| Entry      | [Cu]                                                | Yield (%) |           |            | E.e. (%)   |
|            |                                                     | <b>55</b> | <b>1'</b> | <b>1''</b> |            |
| 1          | CuI                                                 | 80        | 22        | 14         | 89         |
| 2          | CuSCN                                               | 80        | 27        | 10         | 90         |
| 3          | CuTc                                                | 70        | 14        | 22         | 78         |
| 4          | CuBrSMe <sub>2</sub>                                | 79        | 23        | 17         | 87         |
| 5          | Cu(CH <sub>3</sub> CN) <sub>4</sub> PF <sub>6</sub> | 81        | 36        | 9          | 88         |
| 6          | CuBH <sub>4</sub> (PPh <sub>3</sub> ) <sub>2</sub>  | 81        | 12        | 16         | 92         |
| 7          | Cu(PPh <sub>3</sub> ) <sub>3</sub> CF <sub>3</sub>  | 68        | 13        | 24         | 81         |

Reaction conditions: **A55** (0.050 mmol), **E1** (1.5 equiv.), [Cu] (10 mol%), **L\*5** (15 mol%), and Cs<sub>2</sub>CO<sub>3</sub> (3.0 equiv.) in DMF (1.0 mL) at rt for 96 h under argon. The yields are based on <sup>1</sup>H NMR analysis of the crude product using 1,3,5-trimethoxybenzene as an internal standard. The E.e. values are based on HPLC analysis.

**Supplementary Table 14** | Reaction condition optimization with cyclic secondary amine **A55** with  $\alpha$ -methyl secondary alkyl chloride **E1**: screening of cosolvents

| 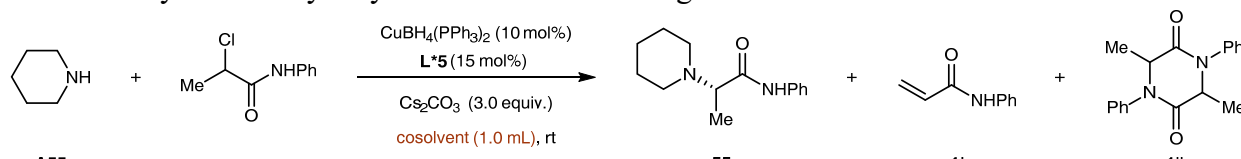 |          |                  |           |    |     |          |
|------------------------------------------------------------------------------------|----------|------------------|-----------|----|-----|----------|
| Entry                                                                              | DMF (mL) | cyclohexane (mL) | Yield (%) |    |     | E.e. (%) |
|                                                                                    |          |                  | 55        | 1' | 1'' |          |
| 1                                                                                  | 1.0      | 0                | 81        | 12 | 16  | 92       |
| 2                                                                                  | 0.8      | 0.2              | 85        | 14 | 15  | 93       |
| 3                                                                                  | 0.7      | 0.35             | 84        | 15 | 15  | 93       |
| 4                                                                                  | 0.6      | 0.4              | 84        | 16 | 16  | 93       |
| 5 <sup>a</sup>                                                                     | 0.8      | 0.2              | 84        | 15 | 15  | 93       |

Reaction conditions: **A55** (0.050 mmol), **E1** (1.5 equiv.), [Cu] (10 mol%), **L\*5** (15 mol%), and Cs<sub>2</sub>CO<sub>3</sub> (3.0 equiv.) in cosolvent (1.0 mL) at rt for 96 h under argon. The yields are based on <sup>1</sup>H NMR analysis of the crude product using 1,3,5-trimethoxybenzene as an internal standard. The E.e. values are based on HPLC analysis. <sup>a</sup>DMF/THF (0.8/0.2 mL) are used.

**Supplementary Table 15** | Product distribution in the N-alkylation of ammonia with secondary alkyl chlorides

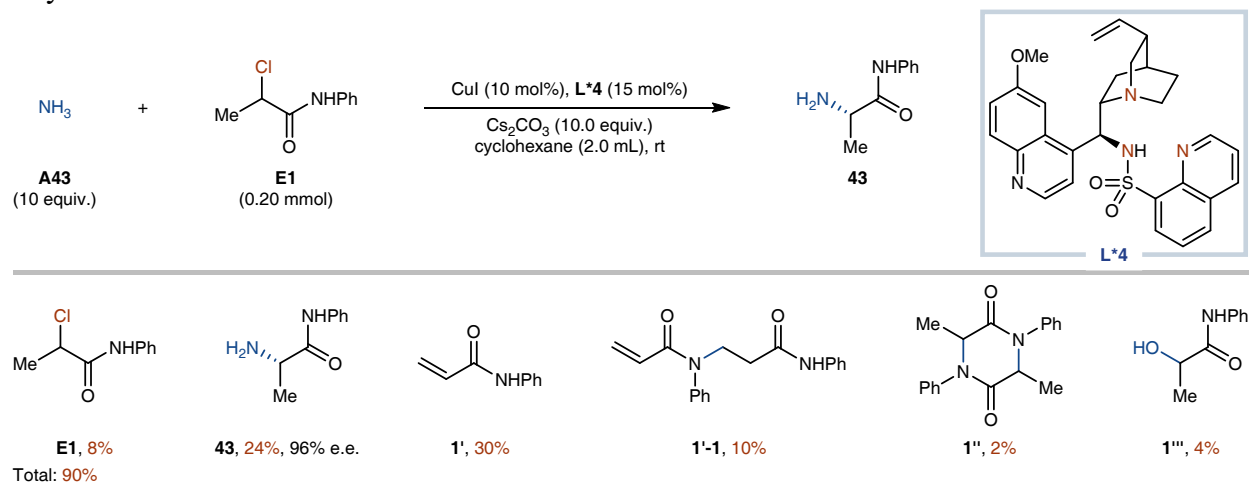

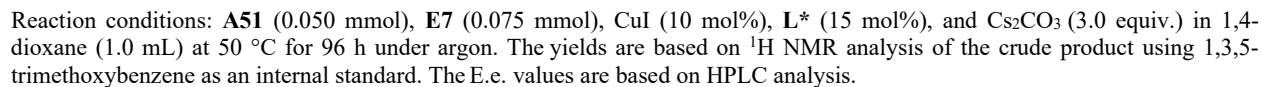



**Supplementary Table 17** | Reaction condition optimization with acyclic secondary amine **A51** with  $\alpha$ -alkyl secondary alkyl chloride **E7**: screening of different solvents

| Entry    | Solvent                        | Yield (%)  |           |              | E.e. (%)  |
|----------|--------------------------------|------------|-----------|--------------|-----------|
|          |                                | <b>104</b> | <b>2'</b> | <b>2''</b>   |           |
| <b>1</b> | <b>1,4-dioxane</b>             | <b>84</b>  | <b>46</b> | <b>trace</b> | <b>88</b> |
| 2        | MTBE                           | 52         | 48        | trace        | 91        |
| 3        | <sup>t</sup> Pr <sub>2</sub> O | 29         | 50        | trace        | 84        |
| 4        | Et <sub>2</sub> O              | 58         | 65        | trace        | 90        |
| 5        | DME                            | 62         | 50        | trace        | 78        |
| 6        | THF                            | 78         | 49        | trace        | 93        |
| <b>7</b> | <b>PhH</b>                     | <b>82</b>  | <b>39</b> | <b>trace</b> | <b>96</b> |
| 8        | PhMe                           | 17         | 10        | trace        | 88        |
| 9        | PhCF <sub>3</sub>              | 68         | 23        | trace        | 88        |
| 10       | PhF                            | 44         | 15        | trace        | 84        |
| 11       | EtOAc                          | 51         | 29        | trace        | 66        |
| 12       | DCM                            | 63         | 24        | trace        | 88        |

Reaction conditions: **A51** (0.050 mmol), **E7** (0.075 mmol), CuI (10 mol%), **L\*7** (15 mol%), and Cs<sub>2</sub>CO<sub>3</sub> (3.0 equiv.) in solvent (1.0 mL) at 50 °C for 96 h under argon. The yields are based on <sup>1</sup>H NMR analysis of the crude product using 1,3,5-trimethoxybenzene as an internal standard. The E.e. values are based on HPLC analysis.

**Supplementary Table 18** | Reaction condition optimization with cyclic secondary amine **A89** with  $\alpha$ -alkyl secondary alkyl chloride **E7**: screening of different ligands

| 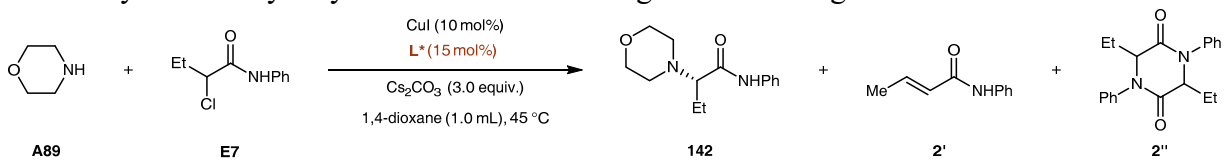 |      |           |    |       |          |
|------------------------------------------------------------------------------------|------|-----------|----|-------|----------|
| <i>ligand screening</i>                                                            |      |           |    |       |          |
|  |      |           |    |       |          |
| Entry                                                                              | L*   | Yield (%) |    |       | E.e. (%) |
|                                                                                    |      | 142       | 2' | 2''   |          |
| 1                                                                                  | L*4  | 99        | 37 | trace | 80       |
| 2                                                                                  | L*5  | >99       | 28 | trace | 40       |
| 3                                                                                  | L*7  | >99       | 27 | trace | 83       |
| 4                                                                                  | L*10 | >99       | 32 | trace | 96       |

Reaction conditions: **A89** (0.050 mmol), **E7** (0.075 mmol), CuI (10 mol%), **L\*** (15 mol%), and Cs<sub>2</sub>CO<sub>3</sub> (3.0 equiv.) in 1,4-dioxane (1.0 mL) at 45 °C for 72 h under argon. The yields are based on <sup>1</sup>H NMR analysis of the crude product using 1,3,5-trimethoxybenzene as an internal standard. The E.e. values are based on HPLC analysis.

**Supplementary Table 19** | Reaction condition optimization with benzylic primary amine **A1** with  $\alpha$ -aryl secondary alkyl chloride **E18**: screening of different copper salts

| Entry | [Cu]                                               | Yield (%) | E.e. (%) |
|-------|----------------------------------------------------|-----------|----------|
| 1     | CuBH <sub>4</sub> (PPh <sub>3</sub> ) <sub>2</sub> | 60        | 88       |
| 2     | Cu(PPh <sub>3</sub> ) <sub>3</sub> CF <sub>3</sub> | 58        | 86       |
| 3     | CuSCN                                              | 62        | 90       |
| 4     | CuCN                                               | 52        | 82       |
| 5     | Cu(OTf) <sub>2</sub>                               | 62        | 86       |
| 6     | CuI                                                | 61        | 84       |
| 7     | CuBr                                               | 65        | 87       |

Reaction conditions: **A1** (0.050 mmol), **E18** (0.075 mmol), [Cu] (10 mol%), **L\*4** (15 mol%), and Cs<sub>2</sub>CO<sub>3</sub> (3.0 equiv.) in 1,4-dioxane (1.0 mL) at rt for 72 h under argon. The yields are based on <sup>1</sup>H NMR analysis of the crude product using 1,3,5-trimethoxybenzene as an internal standard. The E.e. values are based on HPLC analysis.

CuSCN (10 mol%)

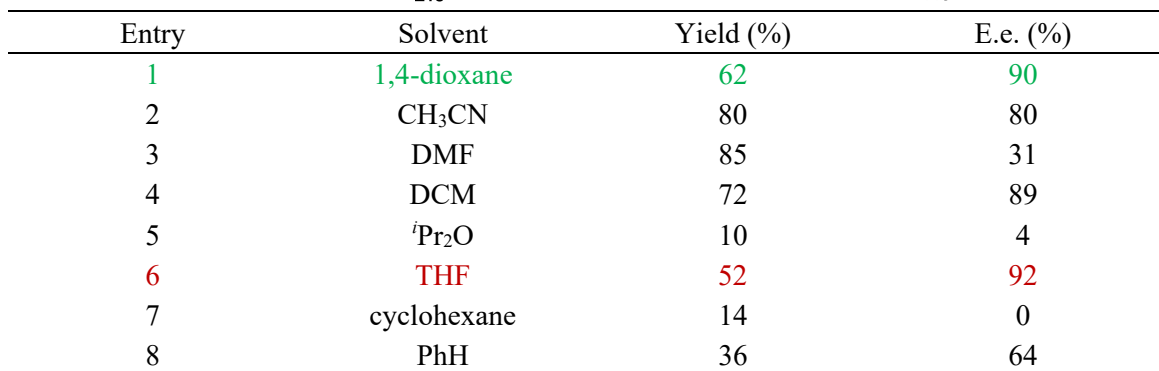

**Supplementary Table 21** | Reaction condition optimization with benzylic primary amine **A1** with  $\alpha$ -aryl secondary alkyl chloride **E18**: screening of different ligands

| Entry | L*          | Yield (%) | E.e. (%) |
|-------|-------------|-----------|----------|
| 1     | <b>L*1</b>  | 65        | 89       |
| 2     | <b>L*2</b>  | 64        | 90       |
| 3     | <b>L*4</b>  | 52        | 92       |
| 4     | <b>L*5</b>  | 40        | 86       |
| 5     | <b>L*7</b>  | 54        | 82       |
| 6     | <b>L*8</b>  | 72        | 93       |
| 7     | <b>L*10</b> | 75        | 88       |
| 8     | <b>L*12</b> | 54        | 91       |

Reaction conditions: **A1** (0.050 mmol), **E18** (0.075 mmol), CuSCN (10 mol%), **L\*** (15 mol%), and Cs<sub>2</sub>CO<sub>3</sub> (3.0 equiv.) in THF (1.0 mL) at rt for 72 h under argon. The yields are based on <sup>1</sup>H NMR analysis of the crude product using 1,3,5-trimethoxybenzene as an internal standard. The E.e. values are based on HPLC analysis.

**Supplementary Table 22** | Reaction condition optimization with benzylic primary amine **A1** with tertiary alkyl chloride **E22**: screening of different ligands

| <div style="display: flex; align-items: center; justify-content: space-around;"> <div style="text-align: center;"> <br/> <b>A1</b> </div> <div>+</div> <div style="text-align: center;"> <br/> <b>E22</b> </div> <div style="text-align: center;"> <math>\xrightarrow[\text{solvent (1.0 mL), rt}]{\begin{array}{l} \text{[Cu] (10 mol\%)} \\ \text{L* (15 mol\%)} \\ \text{base (3.0 equiv.)} \end{array}}</math> </div> <div style="text-align: center;"> <br/> <b>120</b> </div> </div> |                             |            |                                                                 |             |           |           |
|-------------------------------------------------------------------------------------------------------------------------------------------------------------------------------------------------------------------------------------------------------------------------------------------------------------------------------------------------------------------------------------------------------------------------------------------------------------------------------------------------------------------------------------------------------------------------------------------------------------------------------------------------------------------------------------------------------------------------------------------------|-----------------------------|------------|-----------------------------------------------------------------|-------------|-----------|-----------|
| <i>ligand screening</i>                                                                                                                                                                                                                                                                                                                                                                                                                                                                                                                                                                                                                                                                                                                         |                             |            |                                                                 |             |           |           |
| <div style="display: flex; justify-content: space-around; align-items: center;"> <div style="text-align: center;"> <br/> <b>L*4</b> </div> <div style="text-align: center;"> <br/> <b>L*9</b> </div> </div>                                                                                                                                                                                                                                                                                                                                                                  |                             |            |                                                                 |             |           |           |
| Entry                                                                                                                                                                                                                                                                                                                                                                                                                                                                                                                                                                                                                                                                                                                                           | [Cu]                        | L*         | Base                                                            | Solvent     | Yield (%) | E.e. (%)  |
| 1                                                                                                                                                                                                                                                                                                                                                                                                                                                                                                                                                                                                                                                                                                                                               | CuI                         | <b>L*4</b> | Cs <sub>2</sub> CO <sub>3</sub>                                 | 1,4-dioxane | 65        | 1         |
| 2                                                                                                                                                                                                                                                                                                                                                                                                                                                                                                                                                                                                                                                                                                                                               | CuI                         | <b>L*9</b> | Cs <sub>2</sub> CO <sub>3</sub>                                 | 1,4-dioxane | 78        | 41        |
| 3                                                                                                                                                                                                                                                                                                                                                                                                                                                                                                                                                                                                                                                                                                                                               | CuI                         | <b>L*9</b> | Cs <sub>2</sub> CO <sub>3</sub>                                 | MTBE        | 75        | 70        |
| 4                                                                                                                                                                                                                                                                                                                                                                                                                                                                                                                                                                                                                                                                                                                                               | CuI                         | <b>L*9</b> | K <sub>3</sub> PO <sub>4</sub>                                  | MTBE        | 40        | 81        |
| 5                                                                                                                                                                                                                                                                                                                                                                                                                                                                                                                                                                                                                                                                                                                                               | CuBr·SMe <sub>2</sub>       | <b>L*9</b> | K <sub>3</sub> PO <sub>4</sub>                                  | MTBE        | 45        | 86        |
| <b>6<sup>a</sup></b>                                                                                                                                                                                                                                                                                                                                                                                                                                                                                                                                                                                                                                                                                                                            | <b>CuBr·SMe<sub>2</sub></b> | <b>L*9</b> | <b>K<sub>3</sub>PO<sub>4</sub>/Cs<sub>2</sub>CO<sub>3</sub></b> | <b>MTBE</b> | <b>70</b> | <b>91</b> |

Reaction conditions: **A1** (0.060 mmol), **E22** (0.050 mmol), [Cu] (10 mol%), **L\*** (15 mol%), and base (3.0 equiv.) in solvent (1.0 mL) at rt for 96 h under argon. The yields are based on <sup>1</sup>H NMR analysis of the crude product using 1,3,5-trimethoxybenzene as an internal standard. The E.e. values are based on HPLC analysis. <sup>a</sup>K<sub>3</sub>PO<sub>4</sub>/Cs<sub>2</sub>CO<sub>3</sub> (3.0/0.20 equiv.) are used.

**Supplementary Table 23** | Product distribution in the N-alkylation of ammonia with tertiary alkyl chlorides

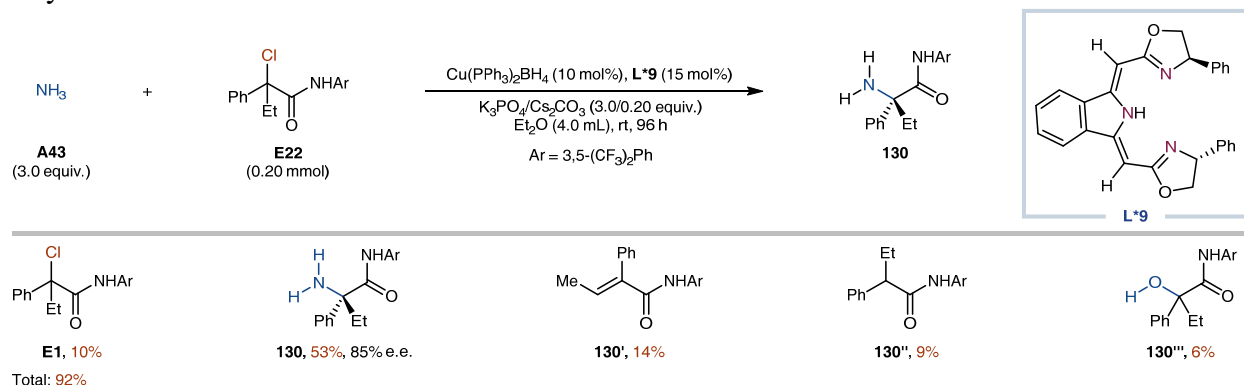

Reaction conditions: **A43** (3.0 equiv.), **E22** (0.20 mmol), CuBH<sub>4</sub>(PPh<sub>3</sub>)<sub>2</sub> (10 mol%), **L\*9** (15 mol%), and K<sub>3</sub>PO<sub>4</sub>/Cs<sub>2</sub>CO<sub>3</sub> (3.0/0.20 equiv.) in Et<sub>2</sub>O (4.0 mL) at rt for 96 h under argon. The yields are based on <sup>1</sup>H NMR analysis of the crude product using 1,3,5-trimethoxybenzene as an internal standard. The E.e. values are based on HPLC analysis.

## 2. Supplementary figures for experiments

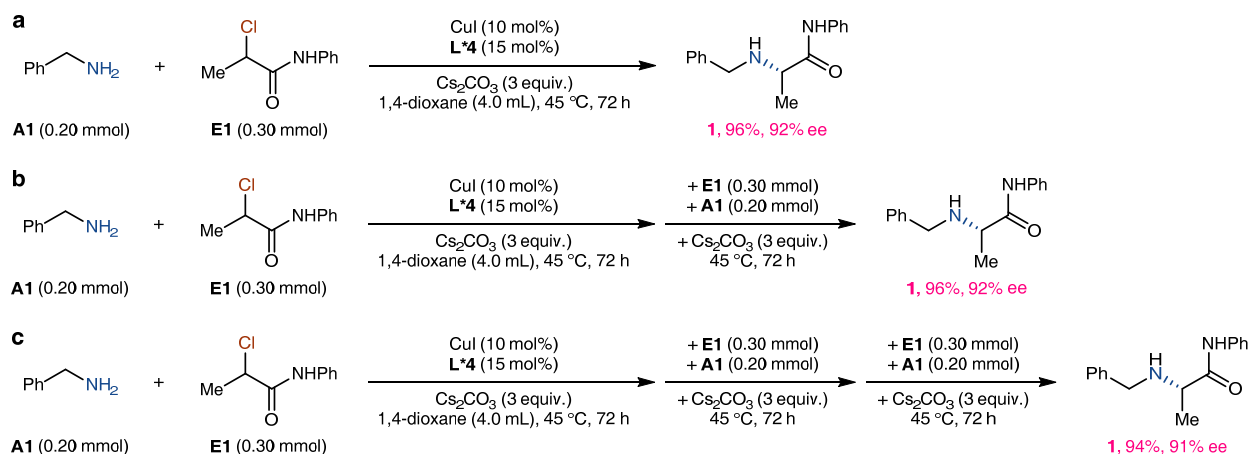

**Supplementary Fig. 1 | Catalytic activity of the in situ formed catalyst in reactions with repeated addition of additional substrates.** Almost the same reaction yield and enantioselectivity were obtained even after three runs of consecutive reactions over more than one week.



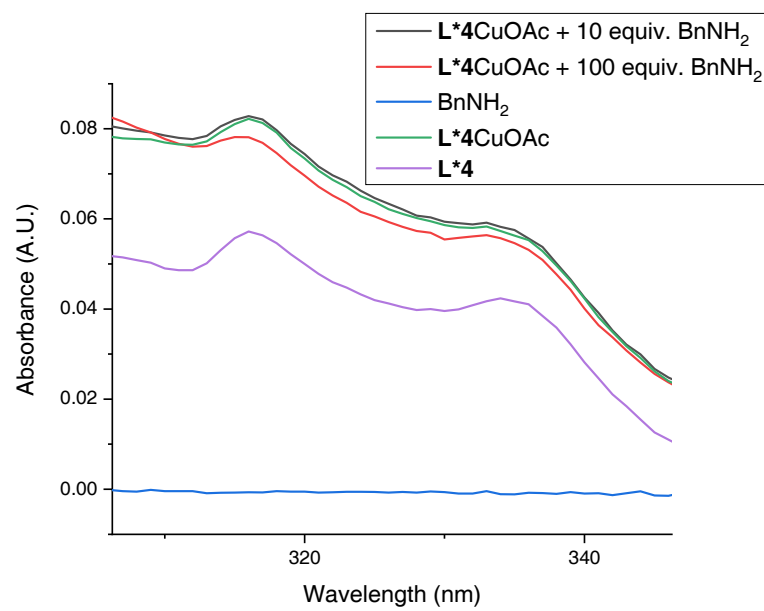

**Supplementary Fig. 2 | UV spectroscopic analysis on the stability of L\*4CuOAc in the presence of benzylamine.** The ligand displacement hardly occurred in the presence of 10 equiv. of benzylamine and only slightly occurred (ca. 16%) when the amount of benzylamine was increased to 100 equiv.

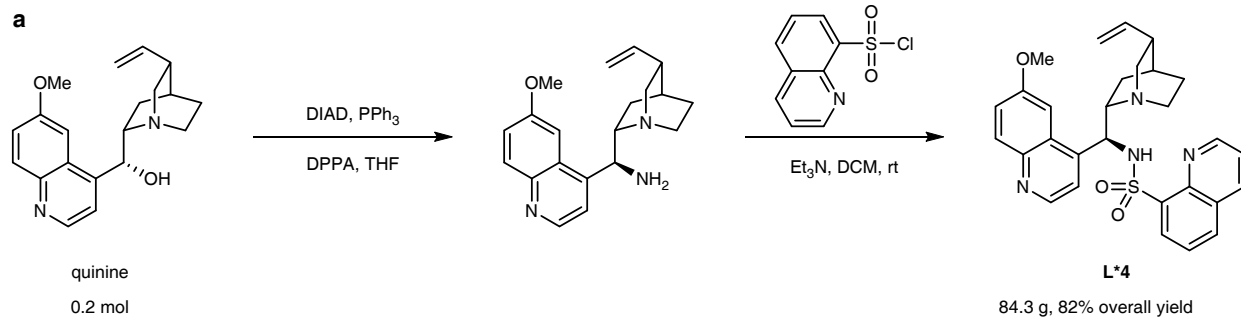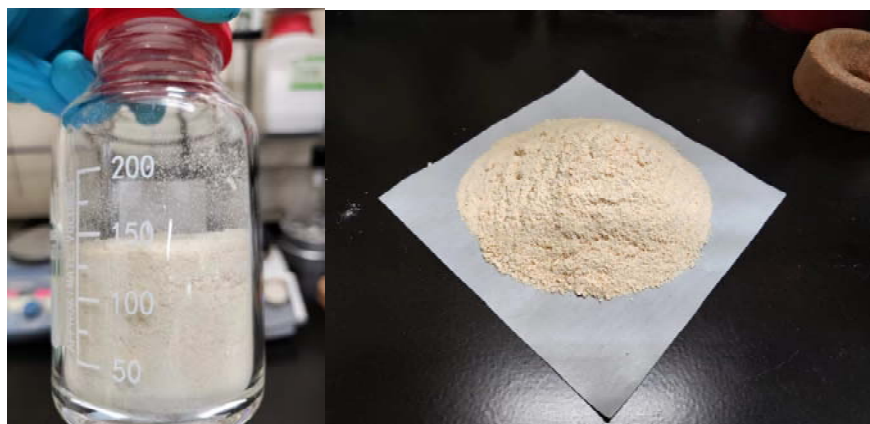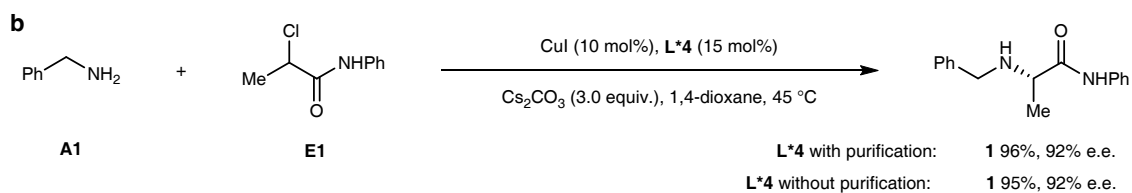

**Supplementary Fig. 3 | a, Synthesis of ligand L\*4, b, Cross-coupling reaction with the crude ligand L\*4.**

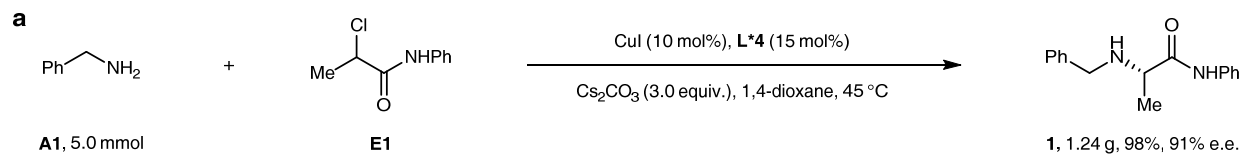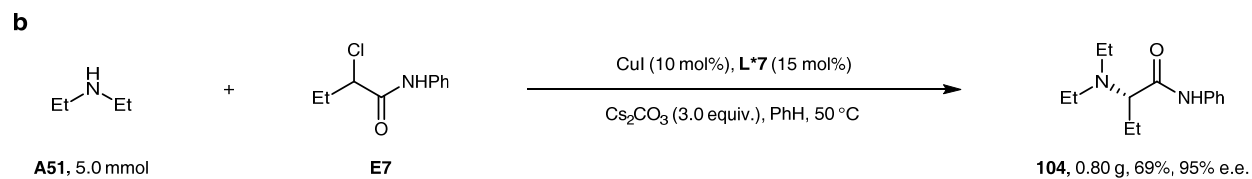

**Supplementary Fig. 4 | Gram-scale experiments.**

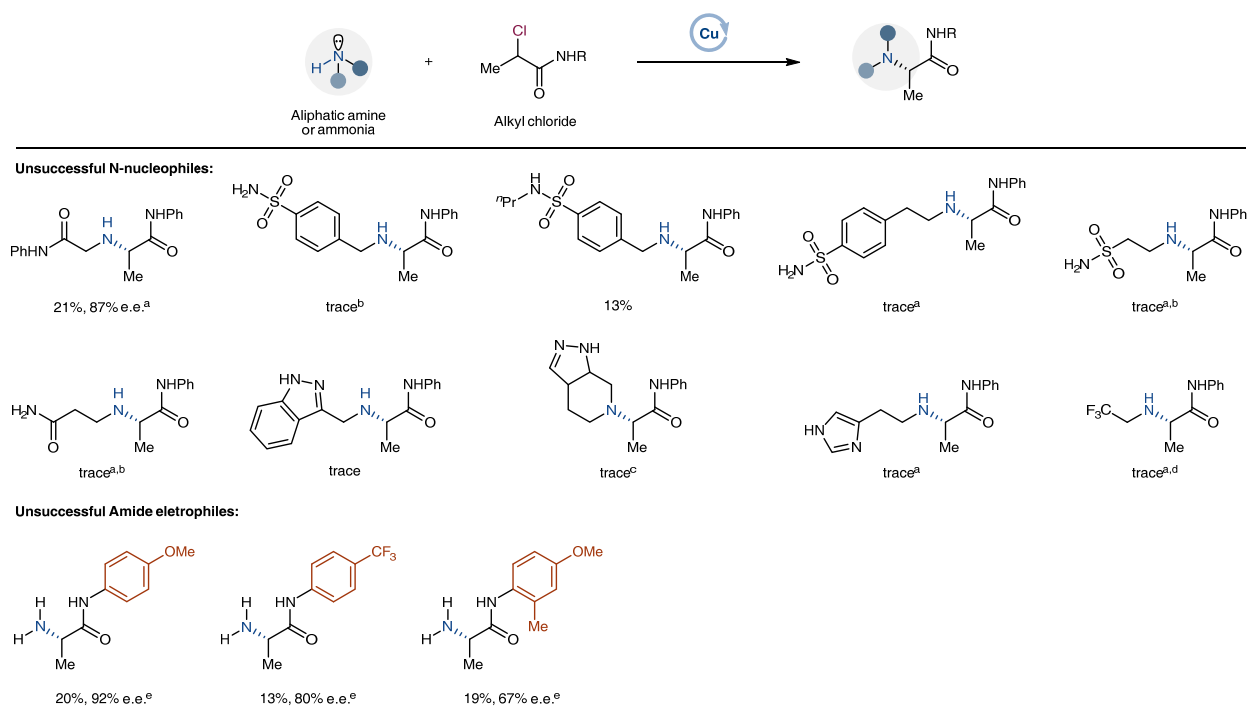

**Supplementary Fig. 5 | Unsuccessful examples.** Standard reaction conditions: aliphatic amine (0.20 mmol), racemic alkyl chloride (1.5 equiv.), CuI (10 mol%), **L\*4** (15 mol%), and Cs<sub>2</sub>CO<sub>3</sub> (4.0 equiv.) in 1,4-dioxane (4.0 mL) under argon at 45 °C. The yields are isolated. The e.e. values are based on chiral HPLC analysis. <sup>a</sup>**L\*5** (15 mol%) in NMP/EtOAc (2.4/1.6 mL) at rt. <sup>b</sup>Amine hydrochloride (0.20 mmol) and Cs<sub>2</sub>CO<sub>3</sub> (5.0 equiv.) were used. <sup>c</sup>CuBH<sub>4</sub>(PPh<sub>3</sub>)<sub>2</sub> (10 mol%), **L\*5** (15 mol%) in DMF/cyclohexane (3.2/0.8 mL) at rt. <sup>d</sup>Cs<sub>2</sub>CO<sub>3</sub> (3.0 equiv.). <sup>e</sup>Ammonia (10.0 equiv.), racemic alkyl chloride (0.2 mmol.), CuI (10 mol%), **L\*10** (15 mol%) and Cs<sub>2</sub>CO<sub>3</sub> (10.0 equiv.) in cyclohexane (2.0 mL) under argon at rt.

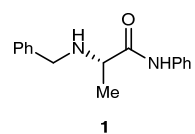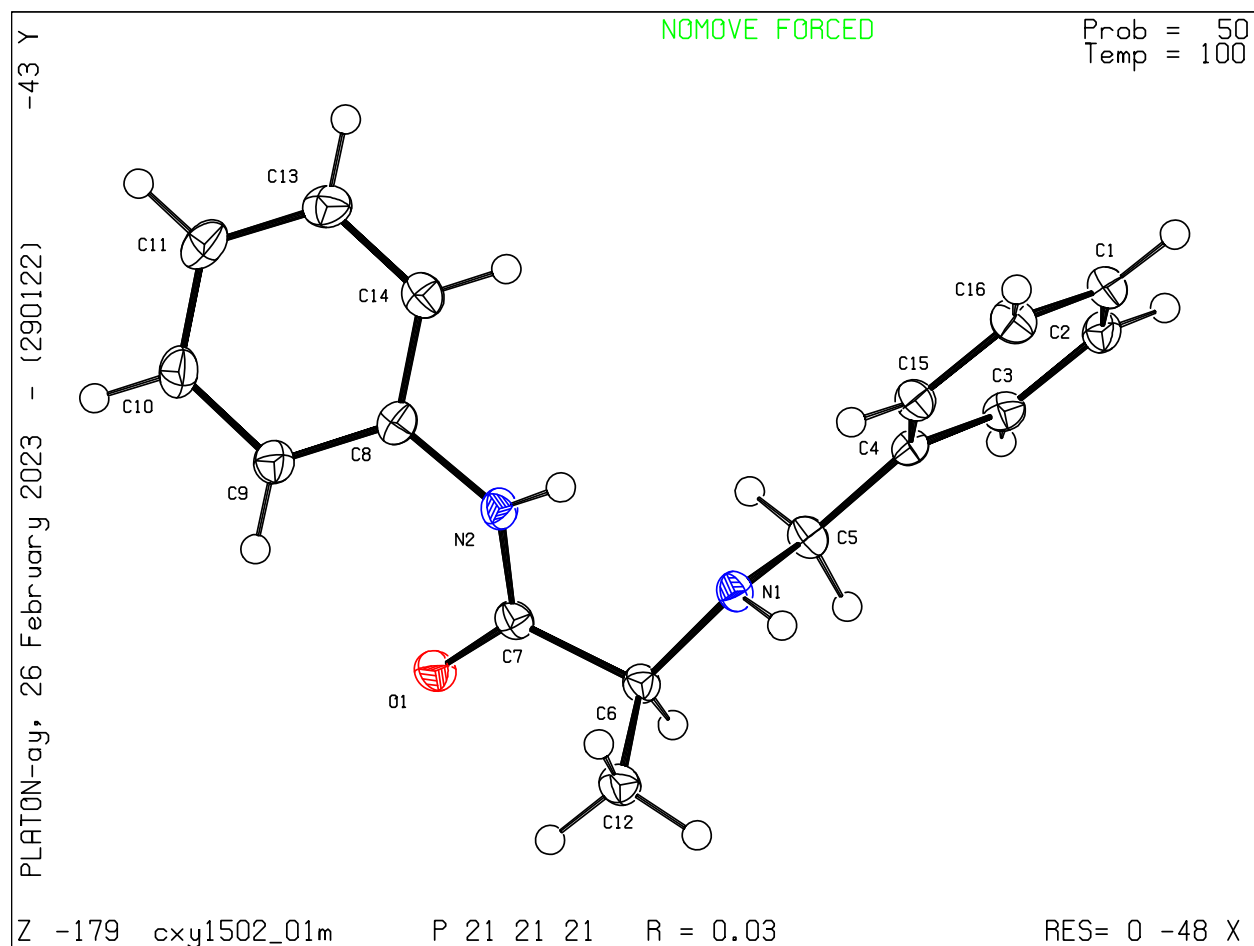

**Supplementary Fig. 6 | The X-ray structure of 1.**

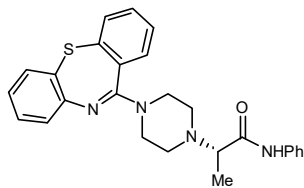

98

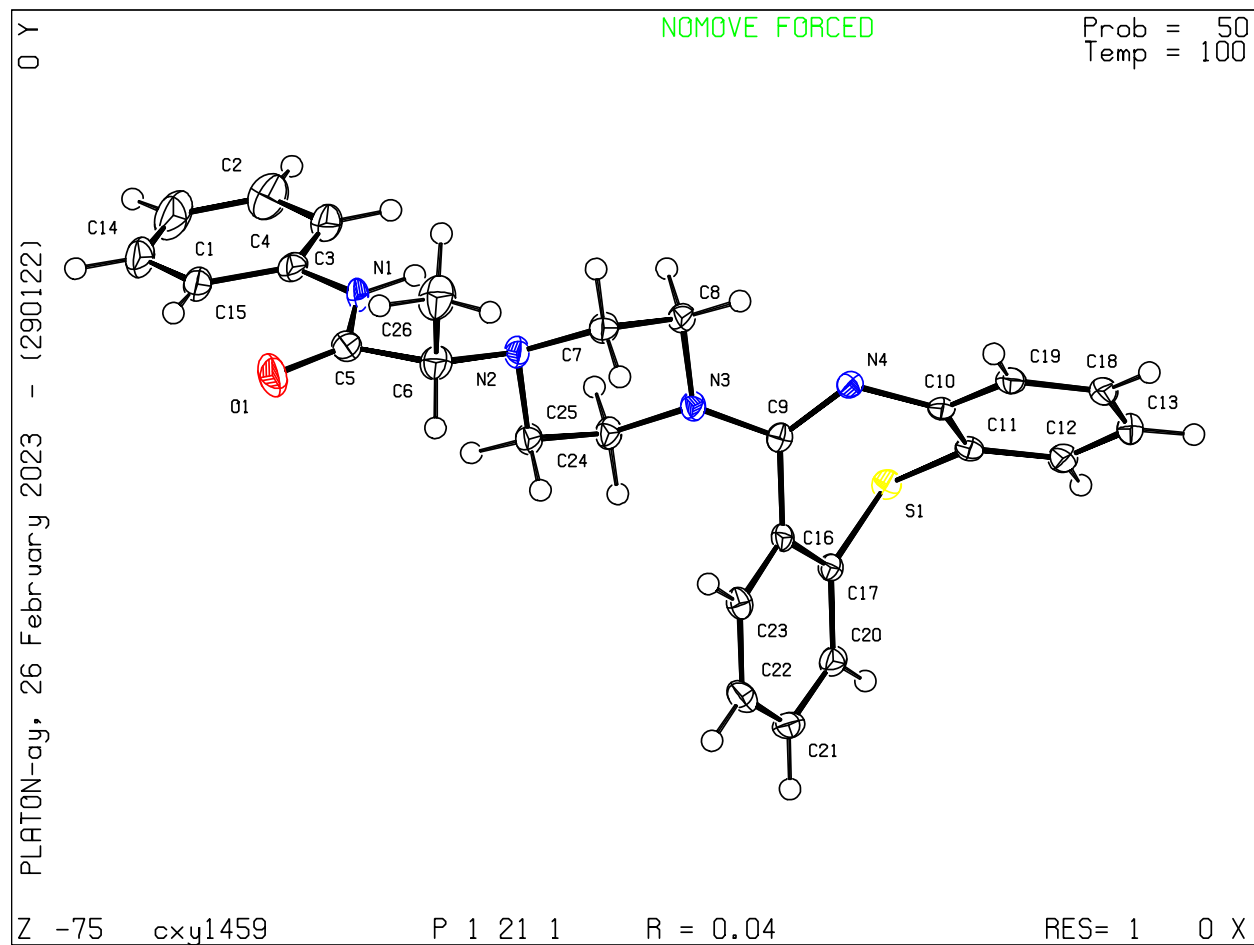

**Supplementary Fig. 7 | The X-ray structure of 98.**

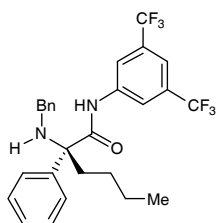

121

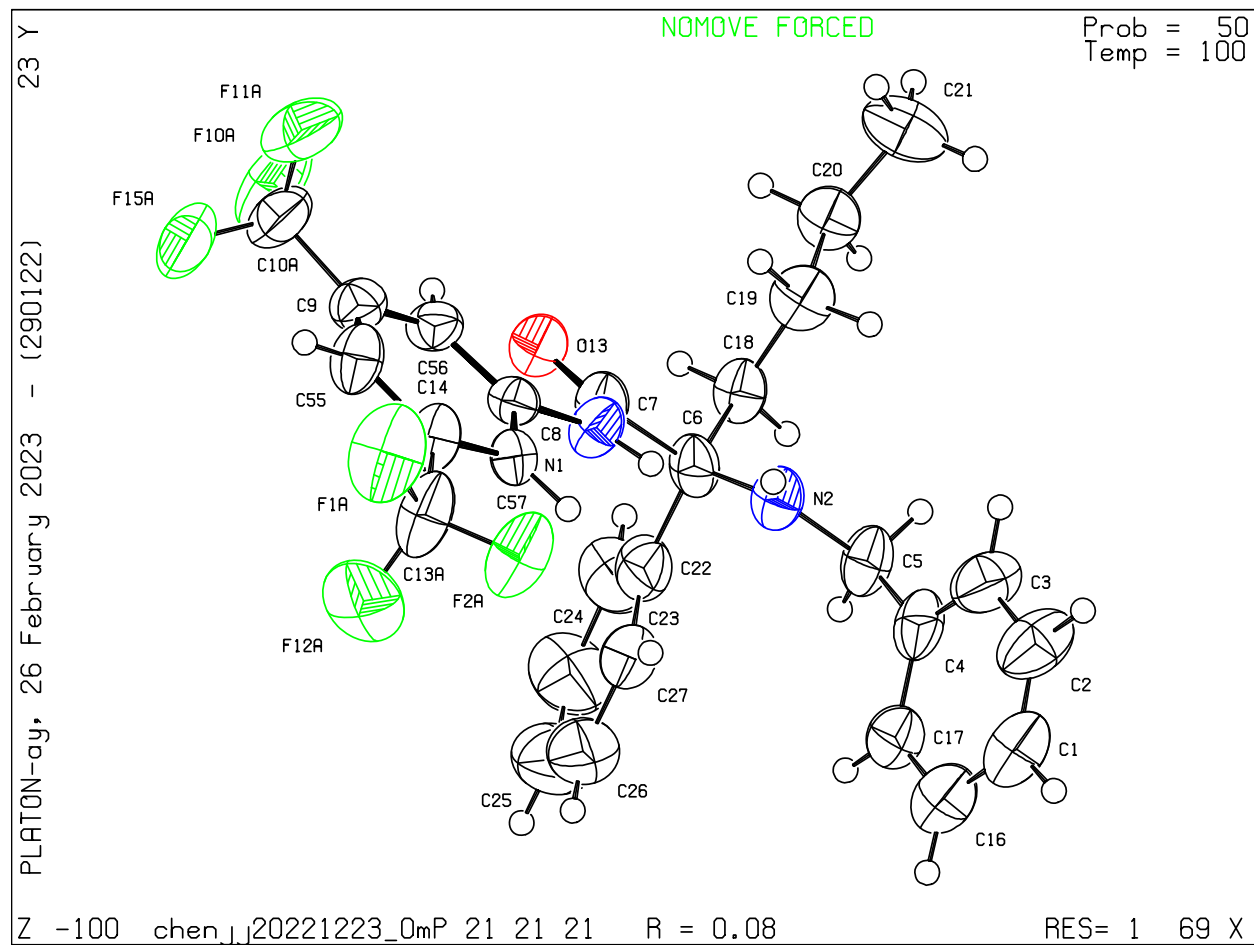

**Supplementary Fig. 8 | The X-ray structure of 121.**

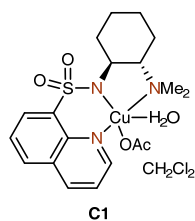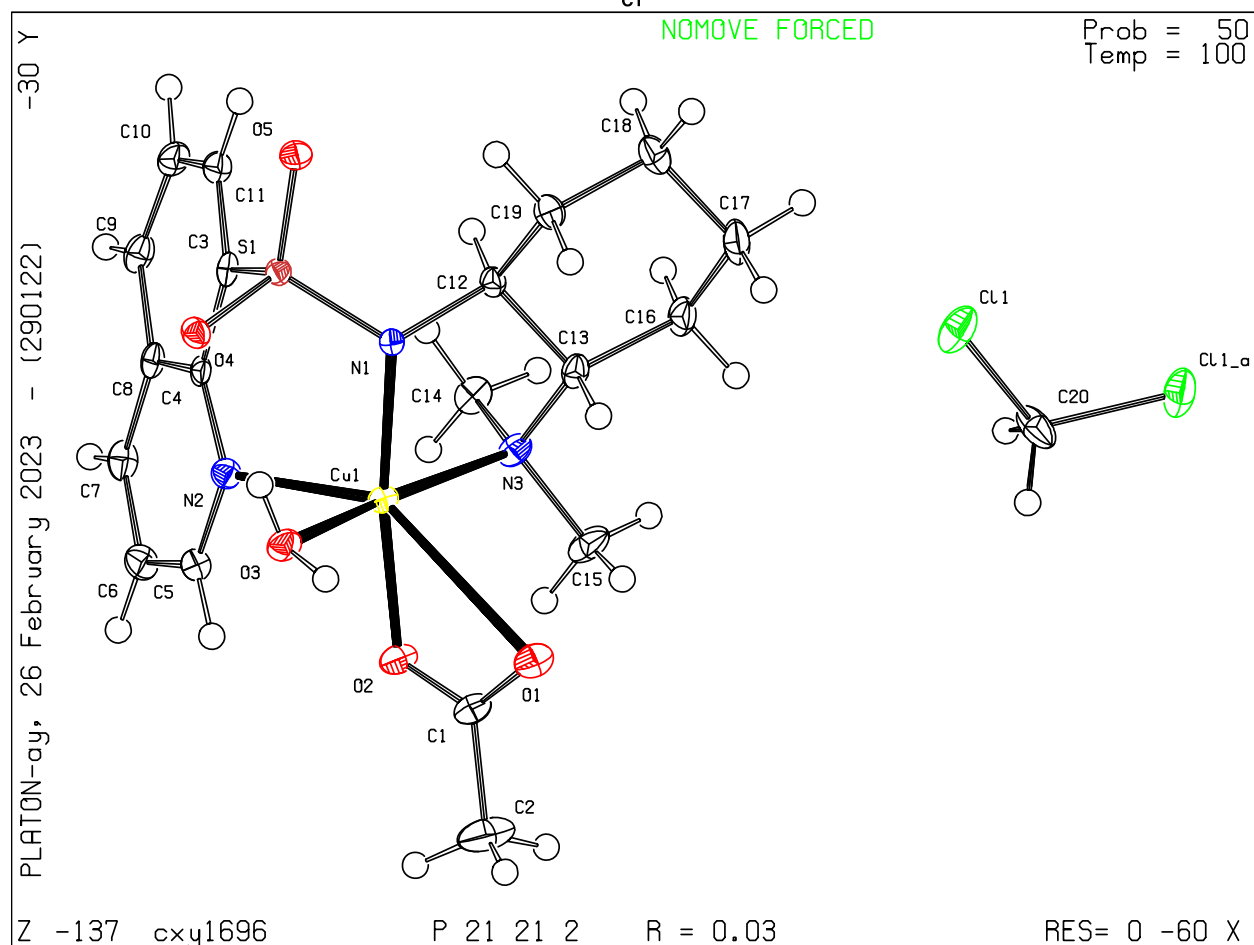

**Supplementary Fig. 9 | The X-ray structure of C1.**



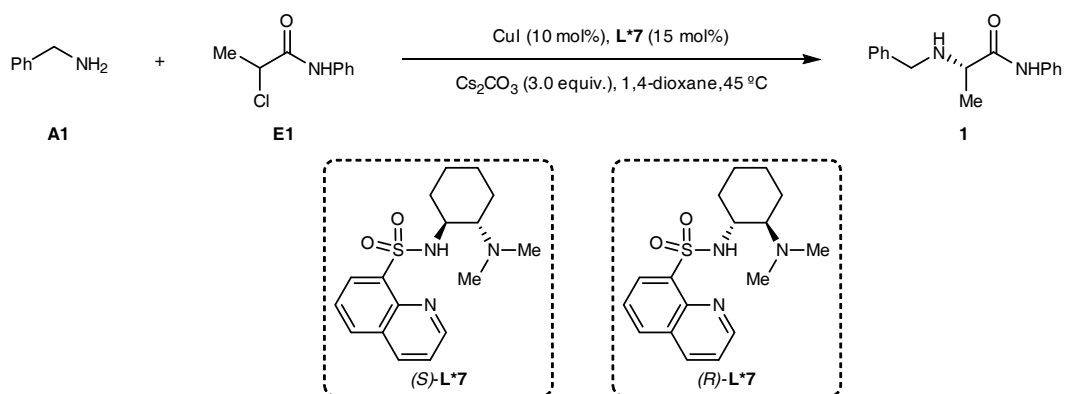

| Entry | Catalyst e.e. (%) | Product e.e. (%) |
|-------|-------------------|------------------|
| 1     | 99                | 86               |
| 2     | 60                | 44               |
| 3     | 20                | 13               |
| 4     | 0                 | 0                |
| 5     | -20               | -15              |
| 6     | -60               | -46              |
| 7     | -99               | -88              |

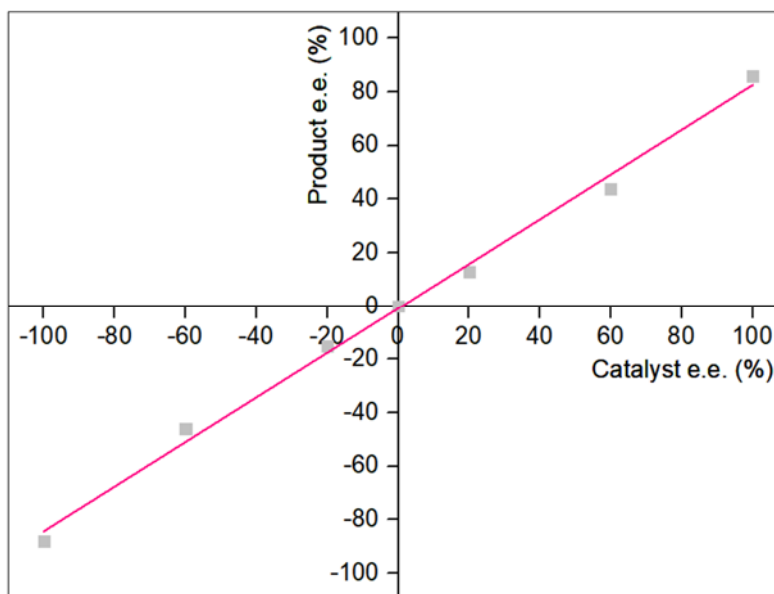

**Supplementary Fig. 10 | The non-linear effect of catalyst**

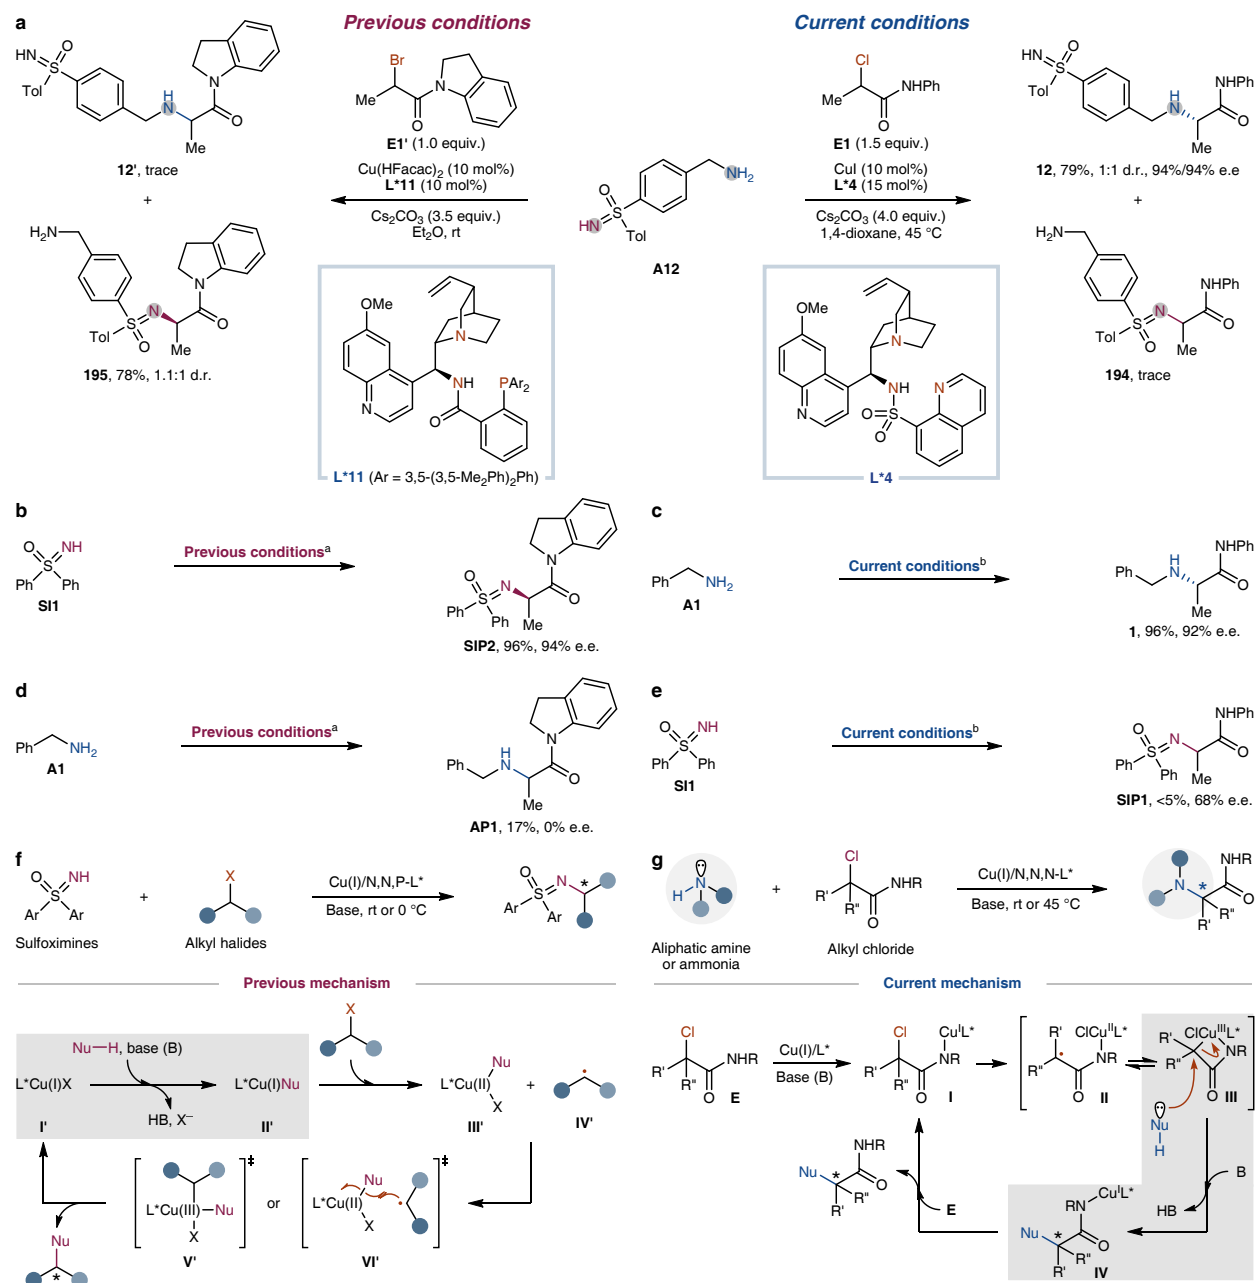

**Supplementary Fig. 11 | Mechanistic difference of the current N-alkylation with our previous C–N cross-coupling.** **a**, Substrate **A12** bearing aliphatic amine and sulfoximine functionalities displayed excellent orthogonal chemoselectivity under our current and previously reported conditions. **b** and **c**, The enantioselective C–N cross-coupling of sulfoximine **SI1** and N-alkylation of amine **A1** under the corresponding optimal conditions, respectively. **d**, Amine **A1** delivered the corresponding N-alkylation product **AP1** in low yield with no enantioselectivity under our previous C–N cross-coupling conditions. **e**, Sulfoximine **SI1** hardly participated in the current N-alkylation reaction, delivering the corresponding product **SIP1** in marginal yield with moderate enantioselectivity. **f**, Our previous enantioselective C–N cross-coupling of sulfoximines starts with sulfoximine pronucleophile deprotonation and subsequent coordination to the copper center. **g**, The current enantioselective N-alkylation reaction involves direct outer-

sphere attack of the catalyst-activated alkyl electrophile by amine nucleophiles. <sup>a</sup>Cs<sub>2</sub>CO<sub>3</sub> (2.5 equiv.). <sup>b</sup>Cs<sub>2</sub>CO<sub>3</sub> (3.0 equiv.).

Zoom in,  $[\text{C}_{44}\text{H}_{42}\text{CuFN}_5\text{O}_4\text{S}]^-$  weak

2 #200-203 RT: 2.18-2.20 AV: 4 NL: 1.89E6  
T: FTMS - p ESI Full ms [200.0000-850.0000]

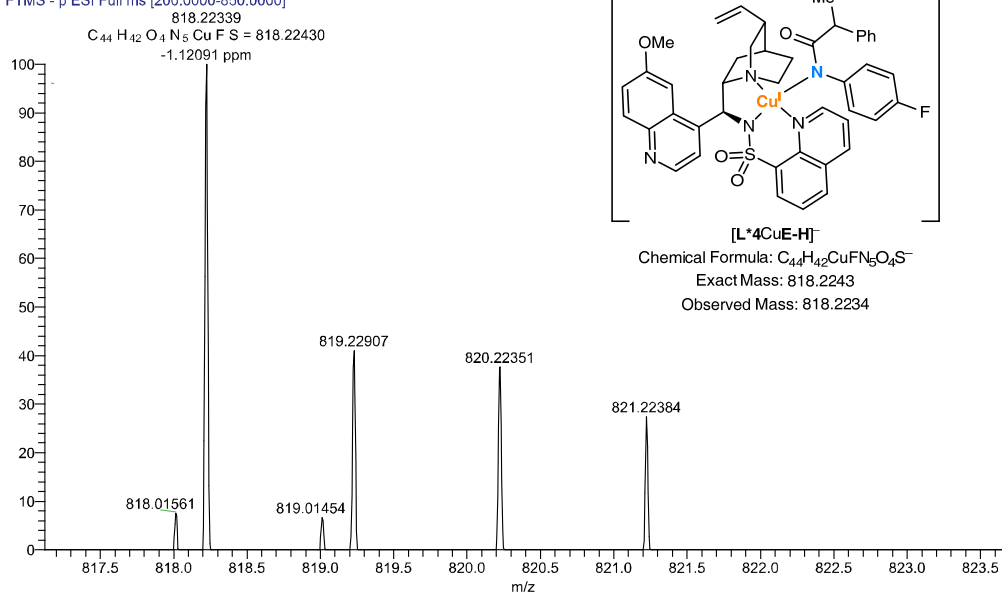

Theoretical spectrum of  $[\text{C}_{44}\text{H}_{42}\text{CuFN}_5\text{O}_4\text{S}]^-$

C44H42CuFN5O4S: C44 H42 Cu1 F1 N5 O4 S1 pa Chrg -1

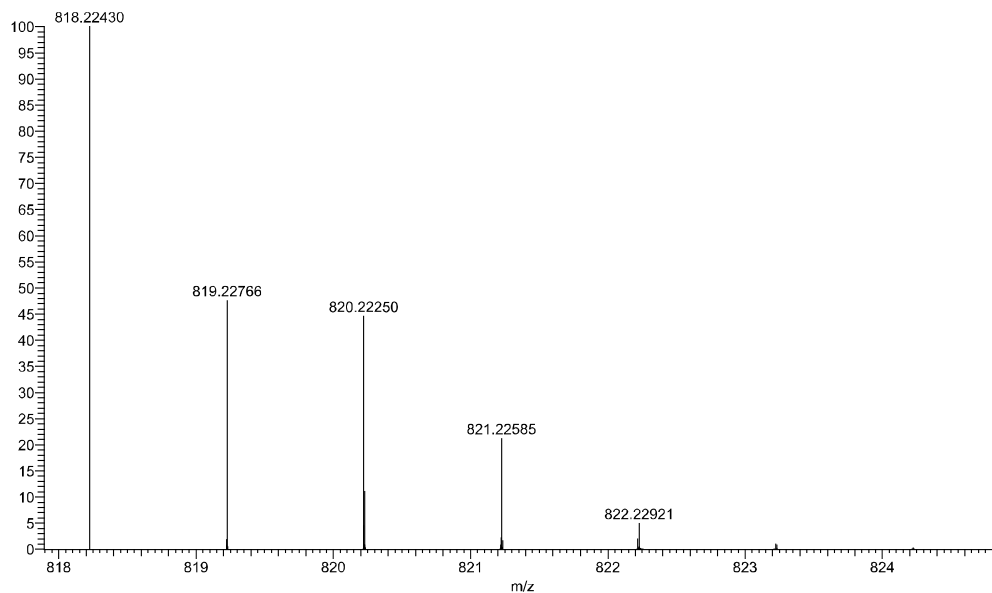

**Supplementary Fig. 12 | High resolution mass spectrum of  $[\text{L}^*4\text{CuE-H}]^-$ .**

Zoom in,  $[\text{C}_{32}\text{H}_{35}\text{CuFN}_4\text{O}_3\text{S}]^-$

3 #74-92 RT: 0.86-0.95 AV: 19 NL: 4.04E7  
T: FTMS - p ESI Full ms [200.0000-800.0000]

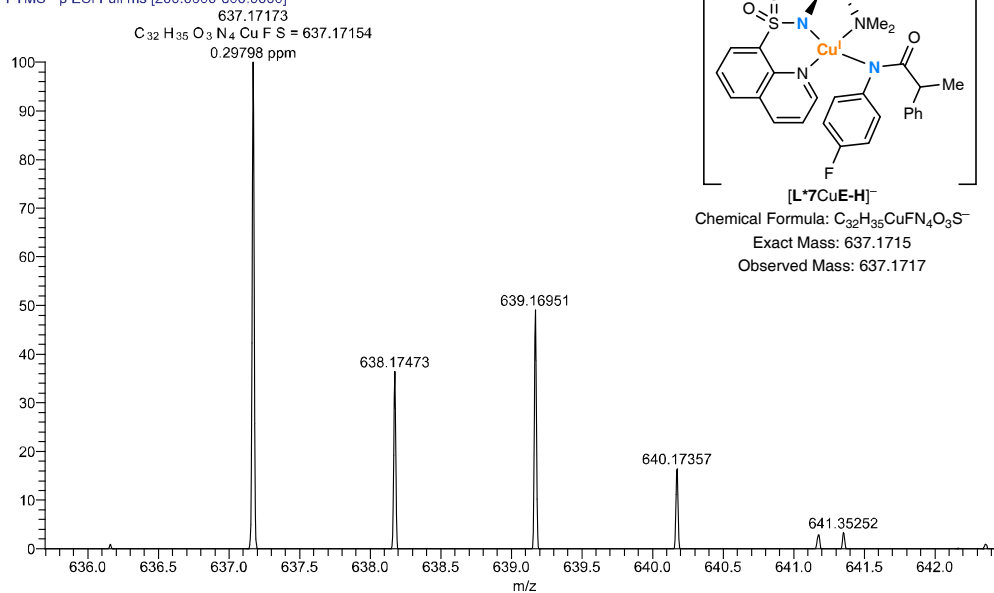

Theoretical spectrum of  $[\text{C}_{32}\text{H}_{35}\text{CuFN}_4\text{O}_3\text{S}]^-$

C32H35CuFN4O3S: C32 H35 Cu1 F1 N4 O3 S1 pa Chrg -1

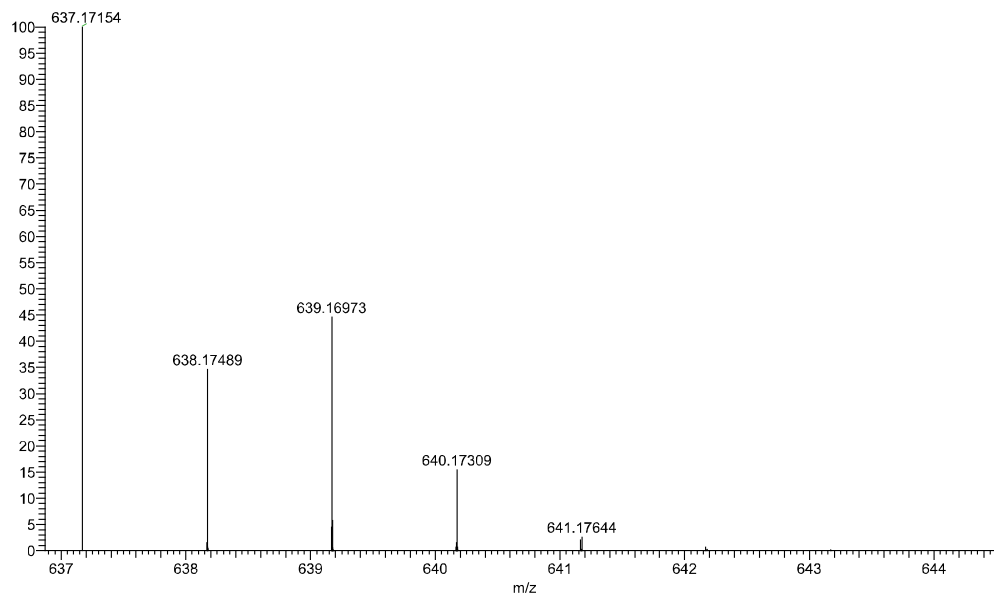

**Supplementary Fig. 13 | High resolution mass spectrum of  $[\text{L}^*\text{7CuE-H}]^-$ .**

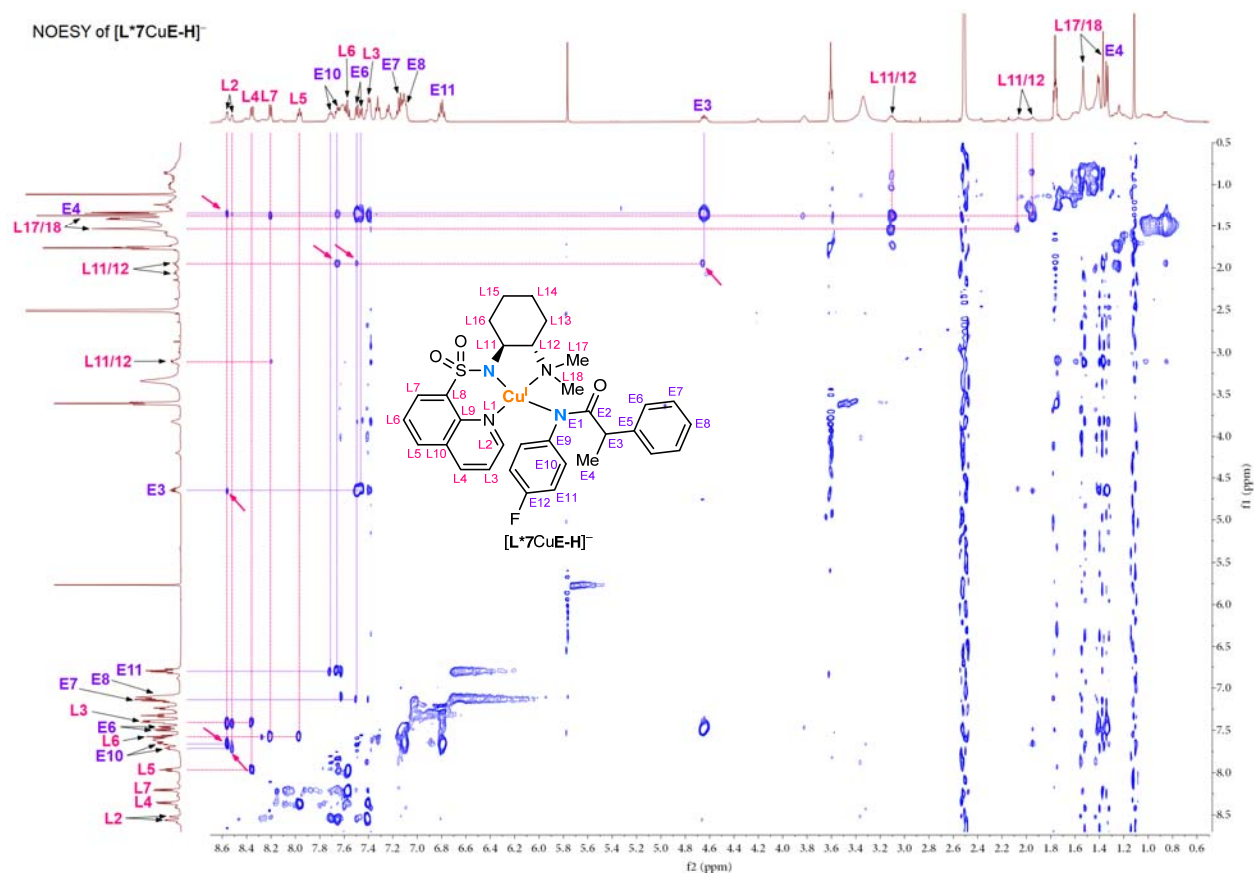

**Supplementary Fig. 14 | NOESY spectrum supporting the formation of  $[L^*7CuE-H]K$ .** A series of cross-peaks (indicated by pink arrows) corresponding to hydrogen atoms of  $L^*7$  and  $E-H$ , respectively, were identified in this spectrum, which indicated the coexistence of these two fragments within one complex molecule.

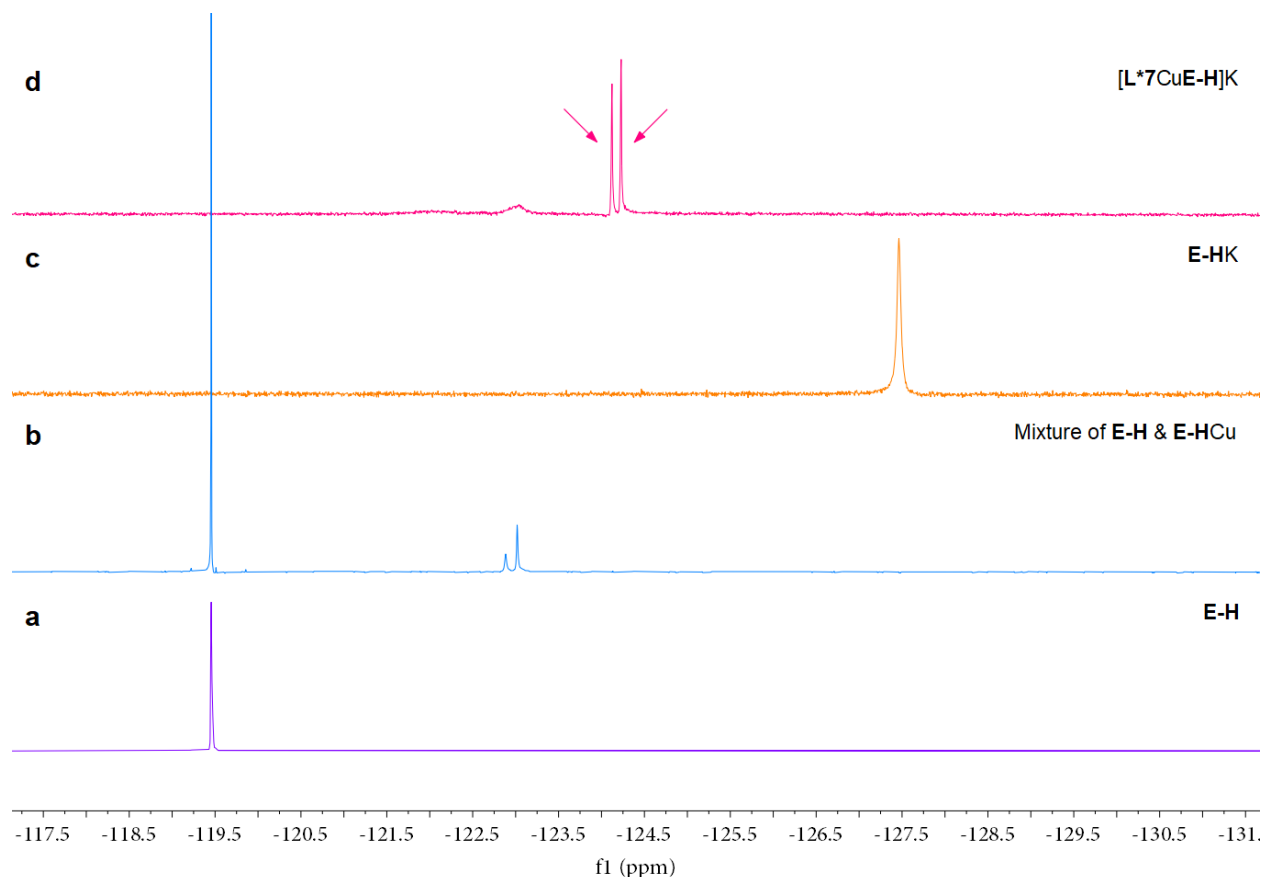

**Supplementary Fig. 15 |  $^{19}\text{F}$  NMR spectra supporting the formation of  $[\text{L}^*7\text{CuE-H}]\text{K}$ .** The two peaks (indicated by pink arrows) corresponding to the proposed  $[\text{L}^*7\text{CuE-H}]\text{K}$  appeared downfield relative to that of **E-HK** and upfield relative to that of **E-H** and **E-HCu**, respectively, which were consistent with the corresponding electron densities of the phenyl rings attached to the amide N. **a**,  $^{19}\text{F}$  NMR spectrum of **E-H** in  $\text{DMSO-}d_6$ . **b**,  $^{19}\text{F}$  NMR spectrum of the crude reaction mixture in  $\text{DMSO-}d_6$ , which was prepared by stirring **E-H**,  $\text{CuI}$  (1.0 equiv.), and  $\text{KO}^t\text{Bu}$  (1.0 equiv.) in anhydrous THF at rt under argon for 1 h. **c**,  $^{19}\text{F}$  NMR spectrum of **E-HK** in  $\text{DMSO-}d_6$ , which was prepared by stirring **E-H** and  $\text{KO}^t\text{Bu}$  (1.0 equiv.) in anhydrous THF at rt under argon for 2 h. **d**,  $^{19}\text{F}$  NMR spectrum of  $[\text{L}^*7\text{CuE-H}]\text{K}$  in  $\text{DMSO-}d_6$ , which was prepared by stirring **E-H**, **L\*7** (1.0 equiv.),  $\text{CuI}$  (1.0 equiv.), and  $\text{KO}^t\text{Bu}$  (2.0 equiv.) in anhydrous THF at rt under argon for 1 h.

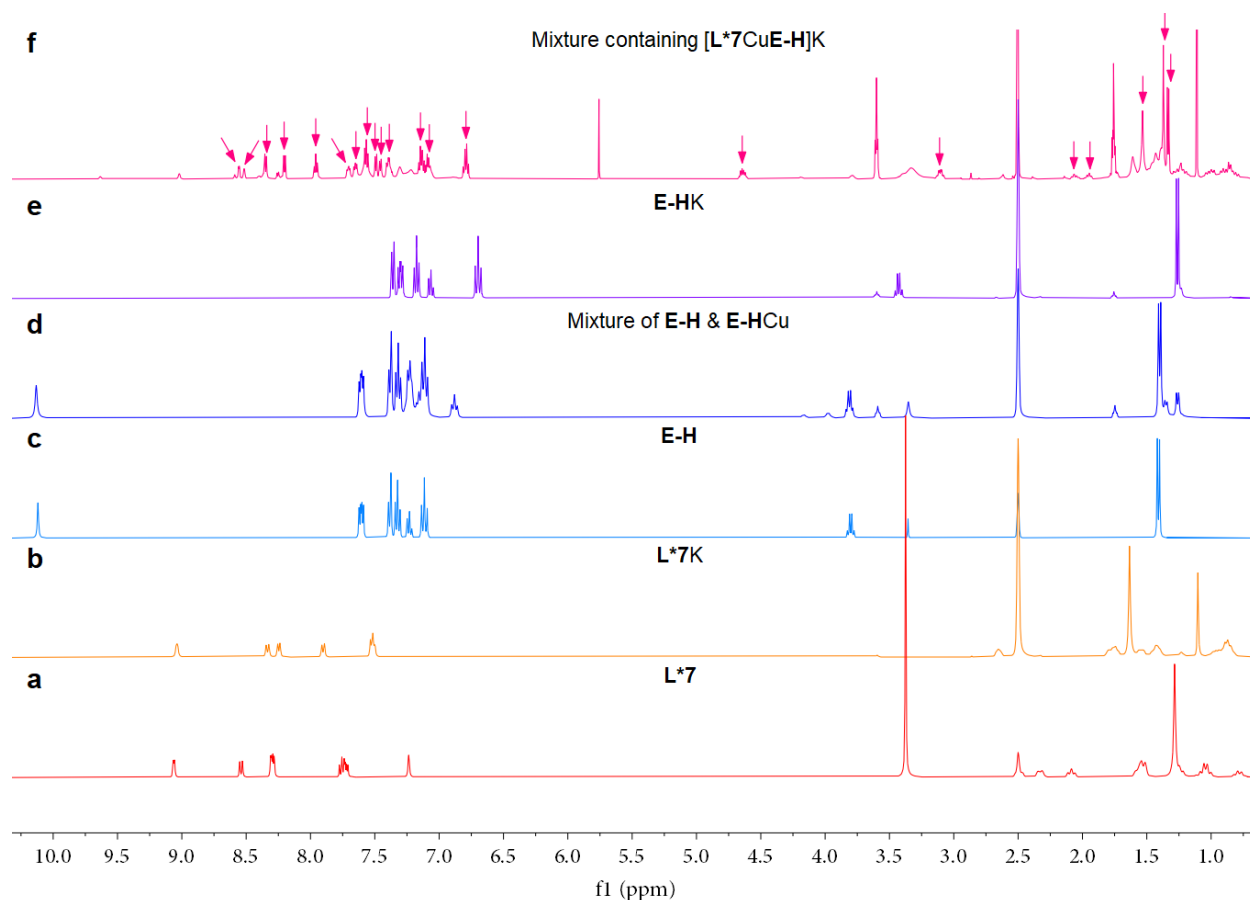

**Supplementary Fig. 16 |  $^1\text{H}$  NMR spectra supporting the formation of  $[\text{L}^*7\text{CuE-H}]\text{K}$ .** The two sets of peaks (indicated by pink arrows) corresponding to the proposed  $[\text{L}^*7\text{CuE-H}]\text{K}$  were identified by comparing the  $^1\text{H}$  NMR spectrum of the mixture with that of others. **a**,  $^1\text{H}$  NMR spectrum of  $\text{L}^*7$  in  $\text{DMSO-}d_6$ . **b**,  $^1\text{H}$  NMR spectrum of  $\text{L}^*7\text{K}$  in  $\text{DMSO-}d_6$ , which was prepared by stirring  $\text{L}^*7$  and  $\text{KO}^t\text{Bu}$  (1.0 equiv.) in anhydrous THF at rt under argon for 1 h. **c**,  $^1\text{H}$  NMR spectrum of  $\text{E-H}$  in  $\text{DMSO-}d_6$ . **d**,  $^1\text{H}$  NMR spectrum of the crude reaction mixture in  $\text{DMSO-}d_6$ , which was prepared by stirring  $\text{E-H}$ ,  $\text{CuI}$  (1.0 equiv.), and  $\text{KO}^t\text{Bu}$  (1.0 equiv.) in anhydrous THF at rt under argon for 1 h. **e**,  $^1\text{H}$  NMR spectrum of  $\text{E-HK}$  in  $\text{DMSO-}d_6$ , which was prepared by stirring  $\text{E-H}$  and  $\text{KO}^t\text{Bu}$  (1.0 equiv.) in anhydrous THF at rt under argon for 2 h. **f**,  $^1\text{H}$  NMR spectrum of  $[\text{L}^*7\text{CuE-H}]\text{K}$  in  $\text{DMSO-}d_6$ , which was prepared by stirring  $\text{E-H}$ ,  $\text{L}^*7$  (1.0 equiv.),  $\text{CuI}$  (1.0 equiv.), and  $\text{KO}^t\text{Bu}$  (2.0 equiv.) in anhydrous THF at rt under argon for 1 h.



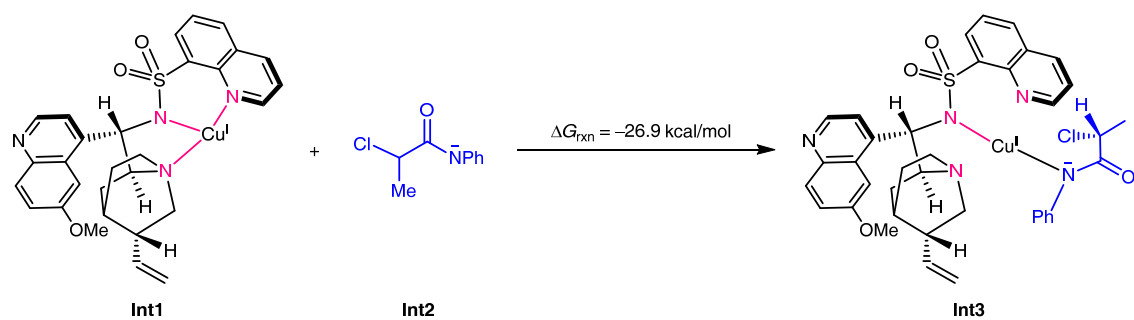

**Supplementary Fig. 17 | Computational study on the complexation of L\*4Cu(I) with the deprotonated amide substrate.** Calculations were carried out at the B3LYP-D3(BJ)/6-311+G(d, p)-SDD-SMD(1,4-dioxane)// B3LYP-D3(BJ)/6-31G(d)-LANL2DZ level of theory.

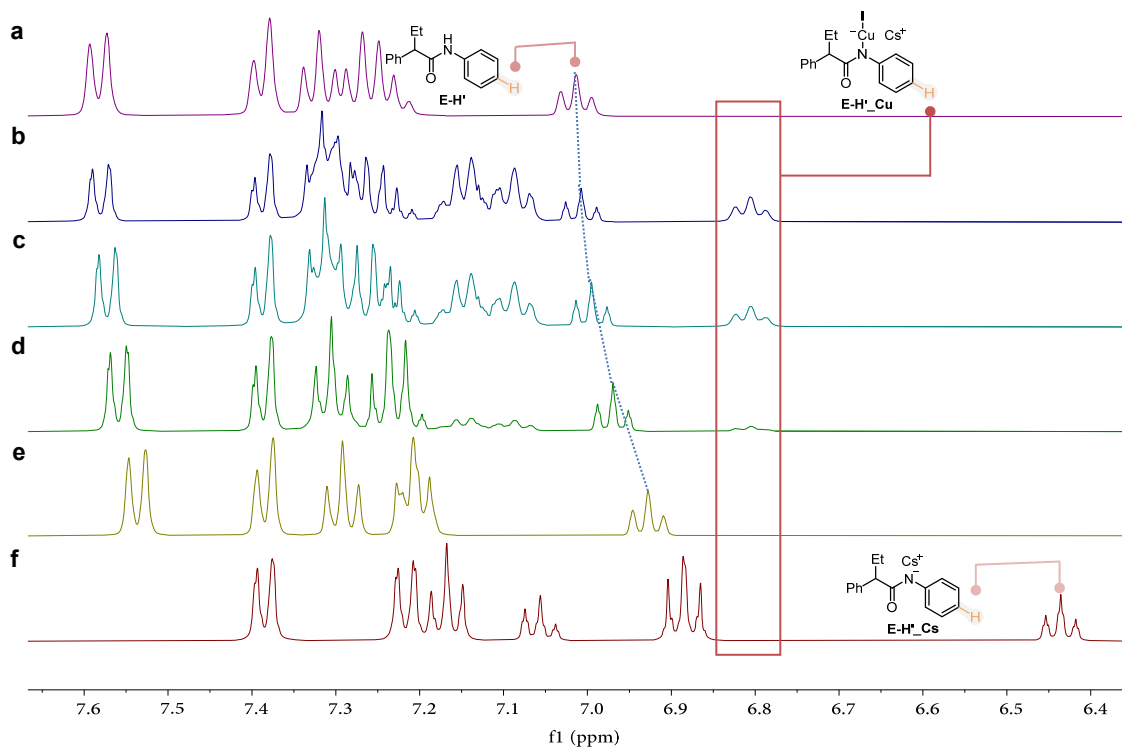

**Supplementary Fig. 18 | Deprotometalation of model amide in presence of CuI and Cs<sub>2</sub>CO<sub>3</sub>.**

**a**, <sup>1</sup>H-NMR spectrum of **E-H'** (25 mM) in DMSO-*d*<sub>6</sub>. **b**, <sup>1</sup>H-NMR spectrum of **E-H'** (25 mM), CuI (1.0 equiv.), and Cs<sub>2</sub>CO<sub>3</sub> (2.0 equiv.) in DMSO-*d*<sub>6</sub>. **c**, <sup>1</sup>H-NMR spectrum of **E-H'** (25 mM), CuI (0.50 equiv.), and Cs<sub>2</sub>CO<sub>3</sub> (2.0 equiv.) in DMSO-*d*<sub>6</sub>. **d**, <sup>1</sup>H-NMR spectrum of **E-H'** (25 mM), CuI (0.25 equiv.), and Cs<sub>2</sub>CO<sub>3</sub> (2.0 equiv.) in DMSO-*d*<sub>6</sub>. **e**, <sup>1</sup>H-NMR spectrum of **E-H'** (25 mM) and Cs<sub>2</sub>CO<sub>3</sub> (2.0 equiv.) in DMSO-*d*<sub>6</sub>. **f**, <sup>1</sup>H-NMR spectrum of **E-H'\_Cs** (25 mM) in DMSO-*d*<sub>6</sub>.

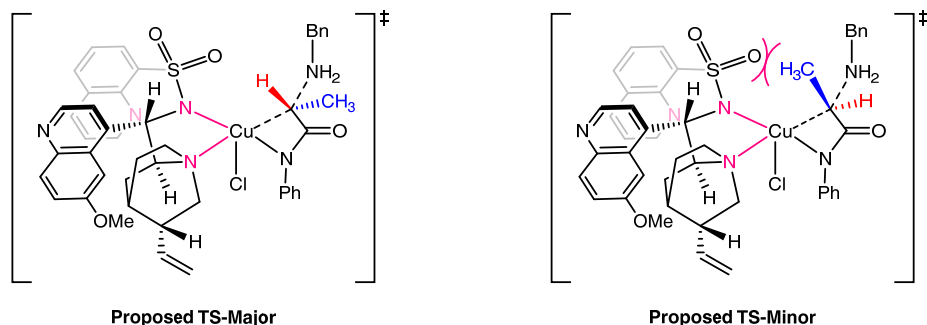

**Supplementary Fig. 19 | Proposed enantiodiscrimination transition states.** The steric clash between the sulfonyl group in **L\*4** and the  $\alpha$ -methyl group in **E1** likely renders the transition state **TS-Minor** unfavorable. In this case, the favorable transition state **TS-Major** gives rise to product **1** of an *S* absolute configuration, which is consistent with the experimental results.

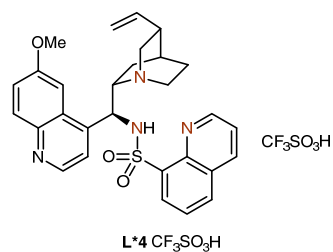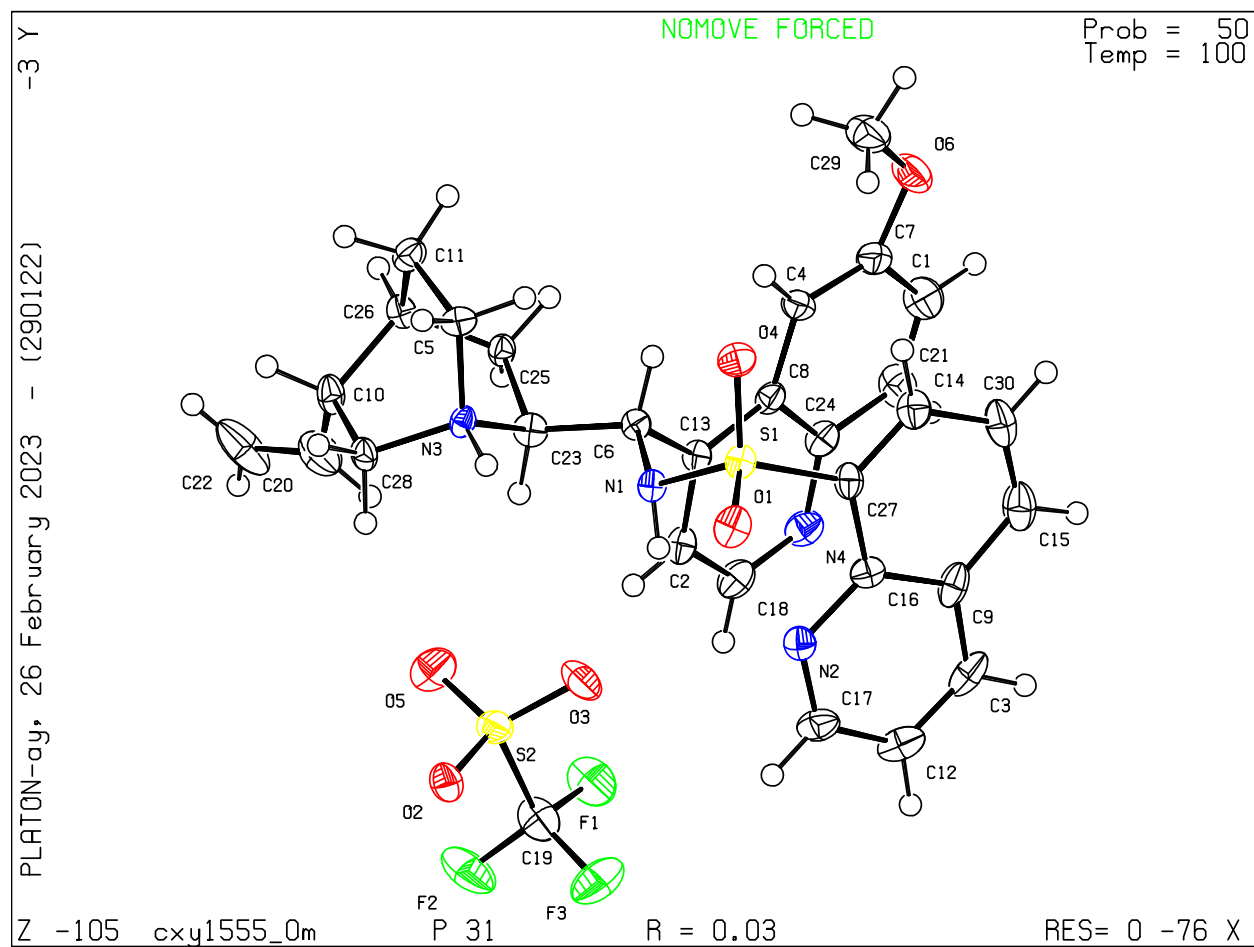

**Supplementary Fig. 20 | The X-ray structure of L\*4.**

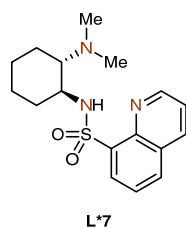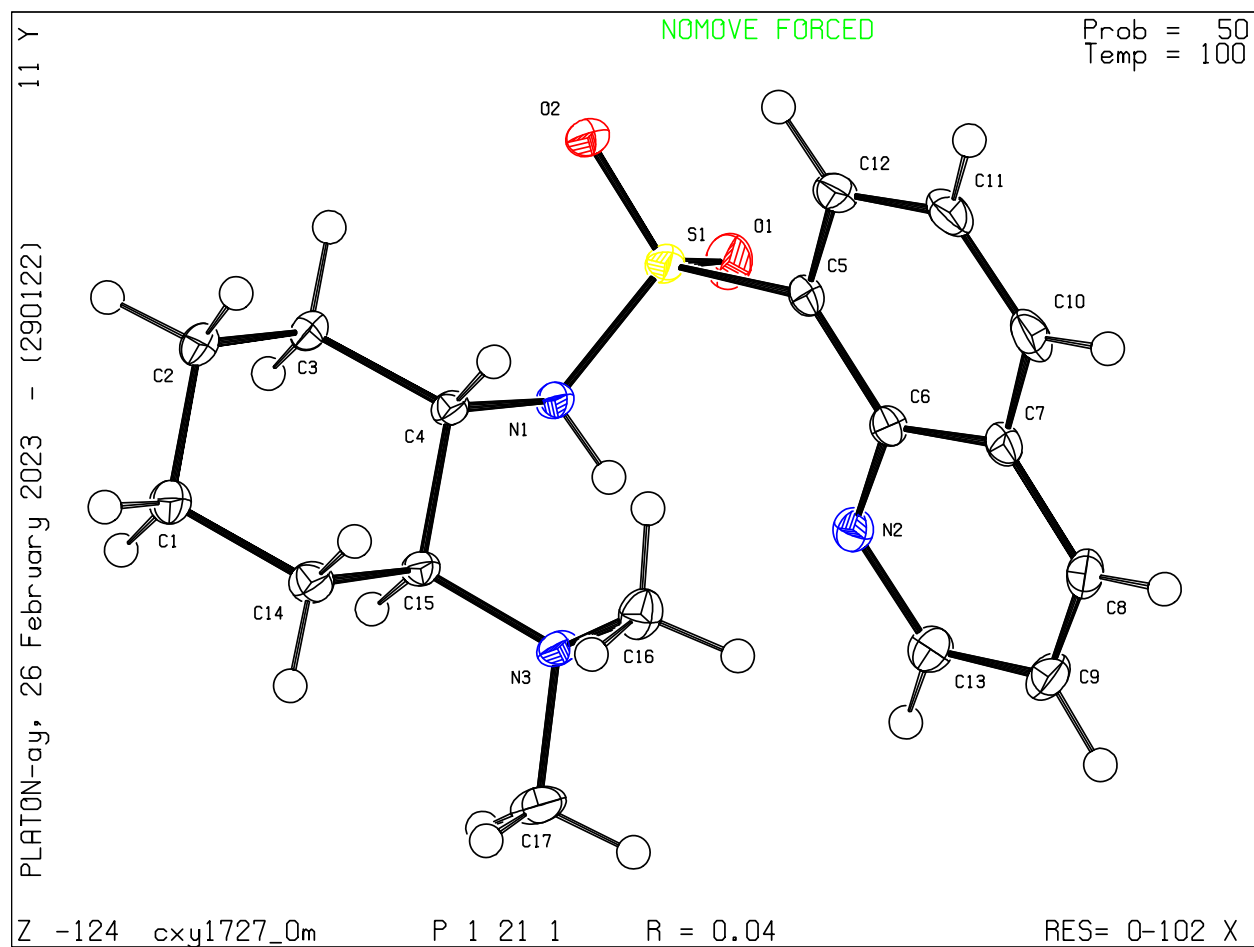

**Supplementary Fig. 21 | The X-ray structure of L\*7.**

### 3. General information

Most of reactions were carried out under argon atmosphere using Schlenk techniques. Reagents were purchased at the highest commercial quality and used without further purification, unless otherwise stated. CH<sub>2</sub>Cl<sub>2</sub>, THF and DMF were purified and dried using a solvent-purification system that contained activated alumina under argon. CuI was purchased from Sigma-Aldrich. CuBH<sub>4</sub>(PPh<sub>3</sub>)<sub>2</sub> was purchased from TCI. CuSCN was purchased from aladdin. Cs<sub>2</sub>CO<sub>3</sub> was purchased from Bide Pharmatech Ltd. and treated by hot gun (approximate 300 to 400 °C) for 2 minutes in vacuum. Anhydrous 1,4-dioxane, NMP, EtOAc, PhH, and cyclohexane was purchased from J&K Scientific. Analytical thin layer chromatography (TLC) was performed on precoated silica gel 60 GF254 plates. Flash column chromatography was performed using Tsingdao silica gel (60, particle size 0.040–0.063 mm). As the eluent, the petroleum ether (PE), EtOAc, CH<sub>2</sub>Cl<sub>2</sub> and CH<sub>3</sub>OH were purchased from Shanghai Titan Scientific Co. Ltd without further purification. Visualization on TLC was achieved by use of UV light (254 nm), iodine on silica gel or basic KMnO<sub>4</sub> indicator. NMR spectra were recorded on Bruker DRX-400 and DPX-600 spectrometers at 400 or 600 MHz for <sup>1</sup>H NMR, 100 or 150 MHz for <sup>13</sup>C NMR and 376 MHz for <sup>19</sup>F NMR, respectively, in CDCl<sub>3</sub>, CD<sub>3</sub>OD or DMSO-*d*<sub>6</sub> with tetramethylsilane (TMS) as internal standard. The chemical shifts are expressed in ppm and coupling constants are given in Hz. Data for <sup>1</sup>H NMR are recorded as follows: chemical shift (ppm), multiplicity (s, singlet; d, doublet; t, triplet; q, quarter; p, pentet, m, multiplet), coupling constant (Hz), integration. Data for <sup>13</sup>C NMR are reported in terms of chemical shift (δ, ppm). Mass spectrometric data were obtained using Bruker Apex IV RTMS. Enantiomeric excess (e.e.) was determined using Agilent high-performance liquid chromatography (HPLC) with a Hatachi detector (at appropriate wavelength) or SHIMADZU LC-20AD with SPD-20AV detector. Column conditions are reported in the experimental section below. X-ray diffraction was measured on a 'Bruker APEX-II CCD' diffractometer with Cu-Kα or Mo-Kα radiation.

#### 4. Synthesis of ligand

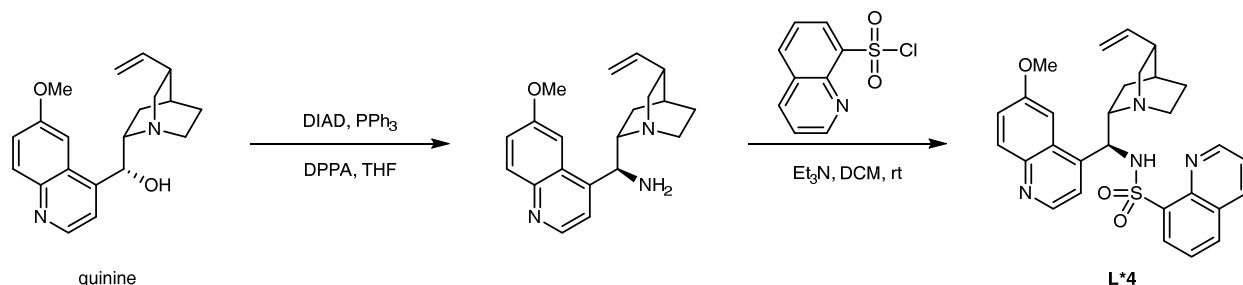

##### General procedure for preparation of L\*4:

According to the literature reported procedure<sup>1</sup> with slightly modification. Under an argon atmosphere, to a solution of quinine (16.2 g, 50.0 mmol, 1.0 equiv.) and triphenylphosphine (PPh<sub>3</sub>) (17.0 g, 65.0 mmol, 1.3 equiv.) in THF (150 mL) was added diisopropyl azodicarboxylate (DIAD) (13.1 g, 65.0 mmol, 1.3 equiv.) at once and stirred for 15 min at 0 °C. Then the reaction mixture was added diphenyl phosphoryl azide (DPPA) (15.8 g, 65.0 mmol, 1.3 equiv.) dropwise over 15 min at 0 °C. The reaction was allowed to warm to room temperature and stirred for 20 h. Next the reaction was heated to 50 °C for 4 h. Another portion of PPh<sub>3</sub> (18.3 g, 70.0 mmol, 1.4 equiv.) was then added and the reaction stirred at 50 °C for an additional 4 h. After cooling the solution to room temperature, H<sub>2</sub>O (20 mL) was added and the solution stirred overnight at room temperature. The mixture was concentrated under reduced pressure, dissolved in CH<sub>2</sub>Cl<sub>2</sub> (50 mL) and diluted with HCl aqueous solution (3.0 M, 50 mL). The aqueous layer was washed with CH<sub>2</sub>Cl<sub>2</sub> (50 mL × 3), alkalinized with ammonium hydroxide and washed with CH<sub>2</sub>Cl<sub>2</sub> (50 mL × 3). The combined organic phase was washed with brine, dried over Na<sub>2</sub>SO<sub>4</sub>, filtrated and concentrated to afford the crude product, which was purified by flash column chromatography on silica gel (CH<sub>2</sub>Cl<sub>2</sub>/CH<sub>3</sub>OH = 100/1 to 10/1) to afford the product quinine-derived chiral amine as a yellowish oil (14.9 g, 92% yield). All spectral data matched that reported in the literature.<sup>1</sup>

According to the literature reported procedure<sup>2</sup> with slightly modification. Under an argon atmosphere, to a solution of quinine-derived chiral amine (1.29 g, 4.0 mmol, 1.0 equiv.) and quinoline-8-sulfonyl chloride (0.95 g, 4.2 mmol, 1.05 equiv.) in CH<sub>2</sub>Cl<sub>2</sub> (20 mL) was added Et<sub>3</sub>N (0.49 g, 4.8 mmol, 1.2 equiv.) dropwise at 0 °C. Then the reaction mixture was warmed up to room temperature and stirred overnight. After completion (monitored by TLC), the reaction was quenched by water and extracted with CH<sub>2</sub>Cl<sub>2</sub> (10 mL × 3) three times. The combined organic phase was washed with brine, dried over Na<sub>2</sub>SO<sub>4</sub>, filtrated and concentrated to afford the crude product, which was purified by flash column chromatography on silica gel (CH<sub>2</sub>Cl<sub>2</sub>/CH<sub>3</sub>OH = 100/1 to 10/1) to afford the product L\*4 as a white solid (1.98 g, 96% yield).

***N*-((*S*)-(6-Methoxyquinolin-4-yl)((1*S*,2*S*,4*S*,5*R*)-5-vinylquinuclidin-2-yl)methyl)quinoline-8-sulfonamide (L\*4)**

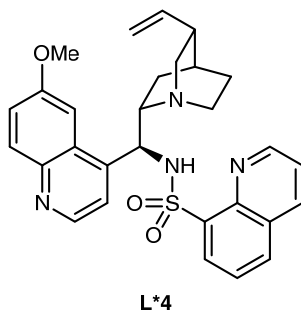

<sup>1</sup>H NMR (400 MHz, CDCl<sub>3</sub>) δ 9.11 – 9.03 (m, 1H), 8.64 – 8.48 (m, 1H), 8.22 – 8.20 (m, 1H),

8.13 – 8.11 (m, 1H), 8.00 – 7.92 (m, 2H), 7.70 – 7.02 (m, 6H), 5.70 – 5.49 (m, 1H), 4.91 – 4.80 (m, 3H), 3.89 (s, 3H), 3.38 – 2.88 (m, 2H), 2.67 – 2.53 (m, 1H), 2.22 – 2.04 (m, 2H), 1.87 – 1.80 (m, 1H), 1.55 – 1.42 (m, 1H), 1.30 – 1.08 (m, 3H), 0.67 – 0.59 (m, 1H).

<sup>13</sup>C NMR (100 MHz, CDCl<sub>3</sub>) δ 157.6, 156.7, 150.8, 147.4, 146.6, 145.0, 144.2, 143.2, 141.2, 136.5, 136.2, 135.9, 135.2, 133.2, 132.9, 131.6, 131.3, 130.8, 128.4, 128.2, 126.9, 124.9, 123.1, 122.0, 121.2, 120.8, 119.6, 114.4, 103.2, 100.9, 63.0, 61.0, 56.4, 55.7, 55.4, 53.0, 39.6, 39.3, 39.0, 27.6, 27.0, 25.9, 25.0.

HRMS (ESI) m/z calcd. for C<sub>29</sub>H<sub>31</sub>N<sub>4</sub>O<sub>3</sub>S [M + H]<sup>+</sup> 515.2111, found 515.2112.

#### Preparation of L\*4 (without column chromatography purification)

According to the **General procedure for preparation of L\*4** with slightly modification. Under an argon atmosphere, to a solution of quinine (64.8 g, 200.0 mmol, 1.0 equiv.) and triphenylphosphine (PPh<sub>3</sub>) (68.1 g, 260.0 mmol, 1.3 equiv.) in THF (600 mL) was added diisopropyl azodicarboxylate (DIAD) (52.5 g, 160.0 mmol, 1.3 equiv.) at once and stirred for 15 min at 0 °C. Then the reaction mixture was added diphenyl phosphoryl azide (DPPA) (63.2 g, 260.0 mmol, 1.3 equiv.) dropwise over 15 min at 0 °C. The reaction was allowed to warm to room temperature and stirred for 20 h. Next the reaction was heated to 50 °C for 4 h. Another portion of PPh<sub>3</sub> (73.4 g, 280.0 mmol, 1.4 equiv.) was then added and the reaction stirred at 50 °C for an additional 4 h. After cooling the solution to room temperature, H<sub>2</sub>O (80 mL) was added and the solution stirred overnight at room temperature. The mixture was concentrated under reduced pressure, dissolved in CH<sub>2</sub>Cl<sub>2</sub> (200 mL) and diluted with HCl aqueous solution (3.0 M, 200 mL). The aqueous layer was washed with CH<sub>2</sub>Cl<sub>2</sub> (200 mL × 3), alkalized with ammonium hydroxide and washed with CH<sub>2</sub>Cl<sub>2</sub> (200 mL × 3). The combined organic phase was washed with brine, dried over Na<sub>2</sub>SO<sub>4</sub>, filtrated and concentrated to afford the crude quinine-derived chiral amine, which was used in the next step without further purification.

Under an argon atmosphere, to a solution of the above quinine-derived chiral amine and quinoline-8-sulfonyl chloride (45.4 g, 200.0 mmol, 1.0 equiv.) in CH<sub>2</sub>Cl<sub>2</sub> (500 mL) was added Et<sub>3</sub>N (24.3 g, 240.0 mmol, 1.2 equiv.) dropwise at 0 °C. Then the reaction mixture was warmed up to room temperature and stirred overnight. After completion (monitored by TLC), the reaction was diluted with HCl aqueous solution (3.0 M, 300 mL). The aqueous layer was washed with CH<sub>2</sub>Cl<sub>2</sub> (200 mL × 3), alkalized with ammonium hydroxide and washed with CH<sub>2</sub>Cl<sub>2</sub> (200 mL × 3). The combined organic phase was washed with brine, dried over Na<sub>2</sub>SO<sub>4</sub>, filtrated and concentrated to afford L\*4 as a white solid (84.3 g, 82% yield), which can be directly used in the coupling reactions without purification.

#### Test L\*4 (without column chromatography purification)

According to **General procedure A** with 2-chloro-*N*-phenylpropanamide **E1** (54.9 mg, 0.30 mmol, 1.5 equiv.), benzylamine **A1** (21.4 mg, 0.20 mmol, 1.0 equiv.), and L\*4 (without column chromatography purification) for 72 h, the reaction mixture was purified by flash column chromatography on silica gel (petroleum ether/EtOAc = 1/1) to yield the product **1** as a white solid (48.4 mg, 95% yield, 92% e.e.).



## 5. Synthesis of $\alpha$ -carbonyl alkyl chloride substrates

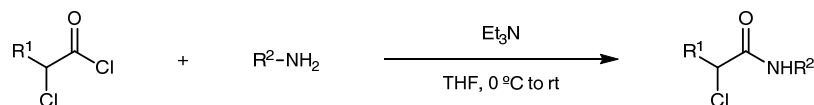

### General procedure 1:

According to the literature reported procedure<sup>3</sup> with slightly modification. To a solution of Et<sub>3</sub>N (1.21 g, 12.0 mmol, 1.2 equiv.) and amine (10.0 mmol, 1.0 equiv.) in THF (20 mL) was added  $\alpha$ -chloro acid chloride (12.0 mmol, 1.2 equiv.) dropwise at 0 °C. Then the reaction mixture was warmed up to room temperature and stirred overnight. After completion (monitored by TLC), the reaction was quenched with HCl aqueous solution (1.0 M, 20 mL) and extracted with EtOAc three times. The combined organic phase was washed with brine, dried over Na<sub>2</sub>SO<sub>4</sub>, filtrated and concentrated to afford the crude product, which was purified by flash column chromatography on silica gel to afford the desired product.

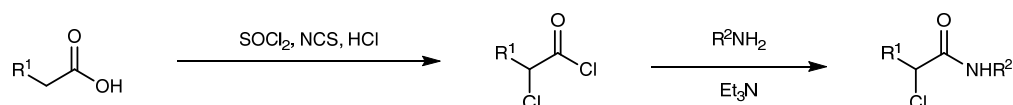

### General procedure 2:

According to the literature reported procedure<sup>4</sup> with slightly modification. The carboxylic acid (25 mmol) was dissolved in SOCl<sub>2</sub> (7.25 mL, 100 mmol), and the resulting solution was heated at reflux for 30 min. The mixture was allowed to cool to room temperature, and then *N*-chlorosuccinimide (8.34 g, 63 mmol), SOCl<sub>2</sub> (5 mL), and HCl (concentrated, 4 drops) were added. The resulting mixture was heated at 90 °C for 2.5 h. The mixture was then allowed to cool to room temperature, the precipitate was filtered off and washed by CCl<sub>4</sub>, and the solvent was removed by evaporation. The resulting liquid residue was used in the next step without further purification.

To a solution of amine (25.0 mmol, 1.0 equiv.) and Et<sub>3</sub>N (3.03 g, 30.0 mmol, 1.2 equiv.) in CH<sub>2</sub>Cl<sub>2</sub> (50 mL) was added the above  $\alpha$ -chloro acid chloride at 0 °C. Then the reaction mixture was warmed up to room temperature and stirred overnight. After completion (monitored by TLC), the reaction was quenched with HCl aqueous solution (1.0 M, 50 mL) and extracted with CH<sub>2</sub>Cl<sub>2</sub> three times. The combined organic phase was washed with brine, dried over Na<sub>2</sub>SO<sub>4</sub>, filtrated and concentrated to afford the crude product, which was purified by flash column chromatography on silica gel to afford the desired product.

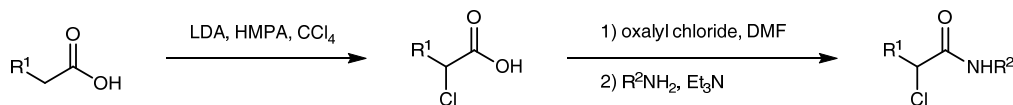

### General procedure 3:

According to the literature reported procedure.<sup>3</sup> To a solution of carboxylic acid (10.0 mmol, 1.0 equiv.) in anhydrous THF (20 mL) was added hexamethylphosphoramide (HMPA) (3 mL) and lithium diisopropylamide (LDA) (22.0 mmol, 2.2 equiv., 1.0 M in THF) via syringe at -78 °C under argon. The reaction was slowly warmed up to 0 °C and stirred for another 1 h. Then the reaction mixture was cooled down to -78 °C again and treated with a solution of CCl<sub>4</sub> (6.08 g, 40.0 mmol, 4.0 equiv.) in THF (3 mL). After being stirred at -78 °C for 2 h, the reaction mixture

was warmed up to room temperature over 1 h and stirred overnight. Then, the reaction was quenched with brine, acidified with 1.0 M aqueous HCl solution, and extracted with EtOAc three times. The combined organic phase was washed with brine, dried over Na<sub>2</sub>SO<sub>4</sub>, filtered and concentrated to afford the crude  $\alpha$ -chloro acid, which was used in the next step without further purification.

To a solution of the above  $\alpha$ -chloro acid in CH<sub>2</sub>Cl<sub>2</sub> (20 mL) was added oxalyl chloride (1.51 g, 12.0 mmol, 1.2 equiv.) and a drop of DMF at 0 °C. The reaction mixture was stirred at 40 °C for 3 h. Then the solvent was removed under reduced pressure to afford the  $\alpha$ -chloro acid chloride, which was used in the next step without further purification.

To a solution of amine (10.0 mmol, 1.0 equiv.) and Et<sub>3</sub>N (1.21 g, 12.0 mmol, 1.2 equiv.) in CH<sub>2</sub>Cl<sub>2</sub> (20 mL) was added the above  $\alpha$ -chloro acid chloride at 0 °C. Then the reaction mixture was warmed up to room temperature and stirred overnight. After completion (monitored by TLC), the reaction was quenched with HCl aqueous solution (1.0 M, 20 mL) and extracted with CH<sub>2</sub>Cl<sub>2</sub> three times. The combined organic phase was washed with brine, dried over Na<sub>2</sub>SO<sub>4</sub>, filtrated and concentrated to afford the crude product, which was purified by flash column chromatography on silica gel to afford the desired product.

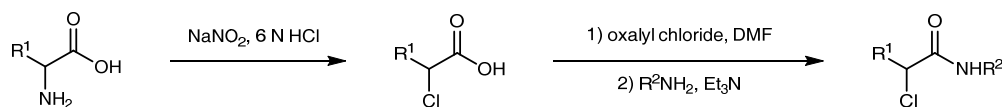

#### General procedure 4:

According to the literature reported procedure<sup>5</sup> with slightly modification. To a solution of amino acid (20 mmol, 1.0 equiv.) in HCl (6 N, 20 mL) was added sodium nitrite (4.14 g, 60 mmol, 3.0 equiv.) in small portions at 0 °C. Then the reaction mixture was stirred at 0 °C for 6 h. After completion, the reaction was diluted with brine and extracted with EtOAc three times. The combined organic phase was washed with brine, dried over Na<sub>2</sub>SO<sub>4</sub>, filtered and concentrated to afford the crude  $\alpha$ -chloro acid, which was used in the next step without further purification.

To a solution of the above  $\alpha$ -chloro acid in CH<sub>2</sub>Cl<sub>2</sub> (50 mL) was added oxalyl chloride (3.02 g, 24.0 mmol, 1.2 equiv.) and a drop of DMF 0 °C. The reaction mixture was stirred at 40 °C for 3 h. Then the solvent was removed under reduced pressure to afford the  $\alpha$ -chloro acid chloride, which was used in the next step without further purification.

To a solution of amine (20.0 mmol, 1.0 equiv.) and Et<sub>3</sub>N (2.43 g, 24.0 mmol, 1.2 equiv.) in CH<sub>2</sub>Cl<sub>2</sub> (50 mL) was added the above  $\alpha$ -chloro acid chloride at 0 °C. Then the reaction mixture was warmed up to room temperature and stirred overnight. After completion (monitored by TLC), the reaction was quenched with HCl aqueous solution (1.0 M, 50 mL) and extracted with CH<sub>2</sub>Cl<sub>2</sub> three times. The combined organic phase was washed with brine, dried over Na<sub>2</sub>SO<sub>4</sub>, filtrated and concentrated to afford the crude product, which was purified by flash column chromatography on silica gel to afford the desired product.

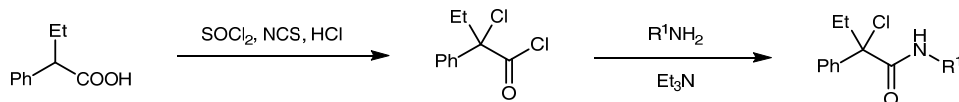

#### General procedure 5:

According to the literature reported procedure.<sup>4</sup> The carboxylic acid (25 mmol) was dissolved in SOCl<sub>2</sub> (7.25 mL, 100 mmol), and the resulting solution was heated at reflux for 30 min. The mixture was allowed to cool to room temperature, and then *N*-chlorosuccinimide (8.34 g, 63 mmol), SOCl<sub>2</sub> (5 mL), and HCl (concentrated, 4 drops) were added. The resulting mixture was

heated at 90 °C for 2.5 h. The mixture was then allowed to cool to room temperature, the precipitate was filtered off and washed by CCl<sub>4</sub>, and the solvent was removed by evaporation. The resulting liquid residue was used in the next step without further purification.

To a solution of amine (25.0 mmol, 1.0 equiv.) and Et<sub>3</sub>N (3.03 g, 30.0 mmol, 1.2 equiv.) in CH<sub>2</sub>Cl<sub>2</sub> (50 mL) was added the above α-chloro acid chloride at 0 °C. Then the reaction mixture was warmed up to room temperature and stirred overnight. After completion (monitored by TLC), the reaction was quenched with HCl aqueous solution (1.0 M, 50 mL) and extracted with CH<sub>2</sub>Cl<sub>2</sub> three times. The combined organic phase was washed with brine, dried over Na<sub>2</sub>SO<sub>4</sub>, filtrated and concentrated to afford the crude product, which was purified by flash column chromatography on silica gel to afford the desired product.

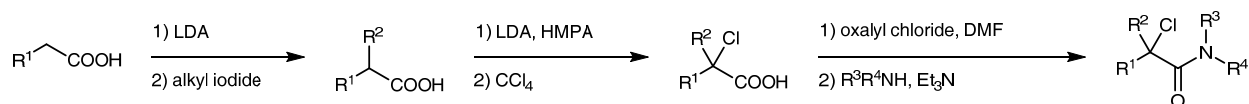

### General procedure 6:

According to the literature reported procedure<sup>6</sup> with slightly modification. To a solution of carboxylic acid (20.0 mmol, 1.0 equiv.) in anhydrous THF (40 mL) was added lithium diisopropylamide (LDA) (44.0 mmol, 2.2 equiv., 1.0 M in THF) via syringe at −78 °C under argon. After being stirred at −78 °C for 30 min, the reaction mixture was warmed up to 0 °C and stirred for another 1 h. The solution was then cooled to −78 °C again and alkyl iodide (21.0 mmol, 1.05 equiv.) was added in one portion. The reaction was warmed up to room temperature over 1 h and stirred overnight. The resulting solution was quenched with brine, acidified with 1.0 M aqueous HCl solution, and extracted with EtOAc three times. The combined organic phase was washed with brine, dried over Na<sub>2</sub>SO<sub>4</sub>, filtered and concentrated to afford the crude acid, which was used directly in the next step without further purification.

To a solution of the above acid in THF (40 mL) was added hexamethylphosphoramide (HMPA, 6 mL) and lithium diisopropylamide (LDA) (44.0 mmol, 2.2 equiv., 1.0 M in THF) via syringe at −78 °C under argon. The reaction was slowly warmed up to 0 °C and stirred for another 1 h. Then the reaction mixture was cooled down to −78 °C again and treated with a solution of CCl<sub>4</sub> (80.0 mmol, 4.0 equiv.) in THF (3 mL). After being stirred at −78 °C for 2 h, the reaction mixture was warmed up to room temperature over 1 h and stirred overnight. Then, the reaction was quenched with brine, acidified with 1.0 M aqueous HCl solution, and extracted with EtOAc three times. The combined organic phase was washed with brine, dried over Na<sub>2</sub>SO<sub>4</sub>, filtered and concentrated to afford the crude α-chloro acid, which was used directly in the next step without further purification.

To a solution of the above α-chloro acid in CH<sub>2</sub>Cl<sub>2</sub> (50 mL) was added oxalyl chloride (24.0 mmol, 1.2 equiv.) and a drop of DMF at 0 °C. The reaction mixture was stirred at 40 °C for 3 h. Then, the solvent was removed under reduced pressure to afford the α-chloro acid chloride, which was used directly in the next step without further purification.

To a solution of amine (20.0 mmol, 1.0 equiv.) and Et<sub>3</sub>N (2.43 g, 24.0 mmol, 1.2 equiv.) in CH<sub>2</sub>Cl<sub>2</sub> (50 mL) was added the above α-chloro acid chloride at 0 °C. Then the reaction mixture was warmed up to room temperature and stirred overnight. After completion (monitored by TLC), the reaction was quenched with HCl aqueous solution (1.0 M, 50 mL) and extracted with CH<sub>2</sub>Cl<sub>2</sub> three times. The combined organic phase was washed with brine, dried over Na<sub>2</sub>SO<sub>4</sub>, filtrated and concentrated to afford the crude product, which was purified by flash column chromatography on silica gel to afford the desired product.

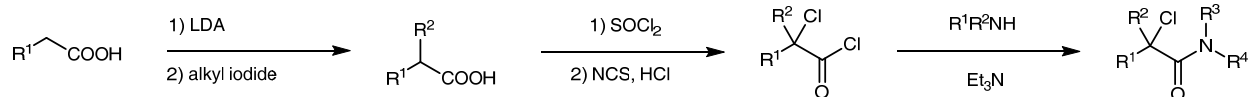

### General procedure 7:

According to the literature reported procedure<sup>4,6</sup> with slightly modification. To a solution of carboxylic acid (20.0 mmol, 1.0 equiv.) in anhydrous THF (40 mL) was added lithium diisopropylamide (LDA) (44.0 mmol, 2.2 equiv., 1.0 M in THF) via syringe at  $-78\text{ }^{\circ}\text{C}$  under argon. After being stirred at  $-78\text{ }^{\circ}\text{C}$  for 30 min, the reaction mixture was warmed up to  $0\text{ }^{\circ}\text{C}$  and stirred for another 1 h. The solution was then cooled to  $-78\text{ }^{\circ}\text{C}$  again and alkyl iodide (21.0 mmol, 1.05 equiv.) was added in one portion. The reaction was warmed up to room temperature over 1 h and stirred overnight. The resulting solution was quenched with brine, acidified with 1.0 M aqueous HCl solution, and extracted with EtOAc three times. The combined organic phase was washed with brine, dried over  $\text{Na}_2\text{SO}_4$ , filtered and concentrated to afford the crude acid, which was used directly in the next step without further purification.

The above acid was dissolved in  $\text{SOCl}_2$  (5.8 mL, 80 mmol), and the resulting solution was heated at reflux for 30 min. The mixture was allowed to cool to room temperature, and then *N*-chlorosuccinimide (6.65 g, 50 mmol),  $\text{SOCl}_2$  (4.0 mL), and HCl (concentrated, 4 drops) were added. The resulting mixture was heated at  $90\text{ }^{\circ}\text{C}$  for 2.5 h. The mixture was then allowed to cool to room temperature, the precipitate was filtered off and washed by  $\text{CCl}_4$ , and the solvent was removed by evaporation. The resulting liquid residue was used in the next step without further purification.

To a solution of amine (20.0 mmol, 1.0 equiv.) and  $\text{Et}_3\text{N}$  (2.43 g, 24.0 mmol, 1.2 equiv.) in  $\text{CH}_2\text{Cl}_2$  (50 mL) was added the above  $\alpha$ -chloro acid chloride at  $0\text{ }^{\circ}\text{C}$ . Then the reaction mixture was warmed up to room temperature and stirred overnight. After completion (monitored by TLC), the reaction was quenched with HCl aqueous solution (1.0 M, 30 mL) and extracted with  $\text{CH}_2\text{Cl}_2$  three times. The combined organic phase was washed with brine, dried over  $\text{Na}_2\text{SO}_4$ , filtrated and concentrated to afford the crude product, which was purified by flash column chromatography on silica gel to afford the desired product.

### 2-Chloro-*N*-phenylpropanamide (E1)

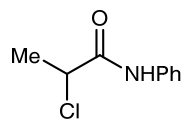

**E1**

According to **General procedure 1** with 2-chloropropionyl chloride (15.12 g, 120.0 mmol, 1.2 equiv.) and aniline (9.31 g, 100.0 mmol, 1.0 equiv.), the reaction mixture was purified by column chromatography on silica gel (petroleum ether/EtOAc = 10/1) to yield the product **E1** as a white solid (16.01 g, 87% yield).

**$^1\text{H}$  NMR** (400 MHz,  $\text{CDCl}_3$ )  $\delta$  8.32 (s, 1H), 7.55 – 7.53 (m, 2H), 7.37 – 7.33 (m, 2H), 7.17 – 7.14 (m, 1H), 4.54 (q,  $J = 7.0\text{ Hz}$ , 1H), 1.82 (d,  $J = 7.1\text{ Hz}$ , 3H).

**$^{13}\text{C}$  NMR** (100 MHz,  $\text{CDCl}_3$ )  $\delta$  167.5, 136.9, 129.0, 125.0, 120.0, 56.1, 22.6.

**HRMS** (ESI)  $m/z$  calcd. for  $\text{C}_9\text{H}_{11}\text{ClNO}$   $[\text{M} + \text{H}]^+$  184.0524, found 184.0523.

### 2-Chloro-*N*-(4-methoxyphenyl)propanamide (E2)

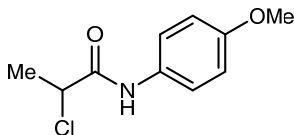

**E2**

According to **General procedure 1** with 2-chloropropionyl chloride (1.51 g, 12.0 mmol, 1.2 equiv.) and 4-methoxyaniline (1.23 g, 10.0 mmol, 1.0 equiv.), the reaction mixture was purified by column chromatography on silica gel (petroleum ether/EtOAc = 5/1) to yield the product **E2** as a white solid (2.09 g, 98% yield).

**<sup>1</sup>H NMR** (400 MHz, CDCl<sub>3</sub>) δ 8.05 (s, 1H), 7.45 – 7.41 (m, 2H), 6.89 – 6.85 (m, 2H), 4.54 (q, *J* = 7.0 Hz, 1H), 3.79 (s, 3H), 1.95 (d, *J* = 7.0 Hz, 3H).

**<sup>13</sup>C NMR** (100 MHz, CDCl<sub>3</sub>) δ 167.2, 156.9, 130.1, 121.9, 114.2, 55.5, 45.4, 23.0.

**HRMS** (ESI) *m/z* calcd. for C<sub>10</sub>H<sub>13</sub>ClNO<sub>2</sub> [*M* + *H*]<sup>+</sup> 214.0629, found 214.0627.

### 2-Chloro-*N*-(4-(trifluoromethyl)phenyl)propanamide (**E3**)

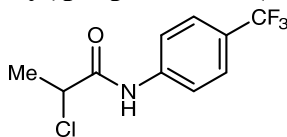

**E3**

According to **General procedure 1** with 2-chloropropionyl chloride (1.51 g, 12.0 mmol, 1.2 equiv.) and 4-(trifluoromethyl)aniline (1.61 g, 10.0 mmol, 1.0 equiv.), the reaction mixture was purified by column chromatography on silica gel (petroleum ether/EtOAc = 5/1) to yield the product **E3** as a white solid (2.50 g, 100% yield).

**<sup>1</sup>H NMR** (400 MHz, CDCl<sub>3</sub>) δ 8.45 (s, 1H), 7.70 – 7.68 (m, 2H), 7.61 – 7.59 (m, 2H), 4.56 (q, *J* = 7.1 Hz, 1H), 1.83 (d, *J* = 7.1 Hz, 3H).

**<sup>13</sup>C NMR** (100 MHz, CDCl<sub>3</sub>) δ 167.8, 140.0, 126.8 (q, *J* = 32.7 Hz), 126.3 (q, *J* = 3.8 Hz), 123.9 (q, *J* = 270.0 Hz), 119.7, 56.9, 22.4.

**<sup>19</sup>F NMR** (376 MHz, CDCl<sub>3</sub>) δ -62.24 (s, 3F).

**HRMS** (ESI) *m/z* calcd. for C<sub>10</sub>H<sub>10</sub>ClF<sub>3</sub>NO [*M* + *H*]<sup>+</sup> 252.0398, found 252.0395.

### *tert*-Butyl (2-chloropropanoyl)glycinate (**E4**)

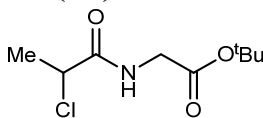

**E4**

According to **General procedure 1** with 2-chloropropionyl chloride (1.51 g, 12.0 mmol, 1.2 equiv.) and *tert*-butyl glycinate (1.31 g, 10.0 mmol, 1.0 equiv.), the reaction mixture was purified by column chromatography on silica gel (petroleum ether/EtOAc = 5/1) to yield the product **E4** as a white solid (1.23 g, 56% yield).

**<sup>1</sup>H NMR** (400 MHz, CDCl<sub>3</sub>) δ 7.11 (s, 1H), 4.46 (q, *J* = 7.0 Hz, 1H), 3.96 (d, *J* = 5.1 Hz, 2H), 1.75 (d, *J* = 7.0 Hz, 3H), 1.49 (s, 9H).

**<sup>13</sup>C NMR** (100 MHz, CDCl<sub>3</sub>) δ 169.8, 168.4, 82.7, 55.4, 42.3, 28.0, 22.5.

**HRMS** (ESI) *m/z* calcd. for C<sub>9</sub>H<sub>16</sub>ClNNaO<sub>3</sub> [*M* + *Na*]<sup>+</sup> 244.0711, found 244.0708.

### 2-Chloro-*N*-phenylbutanamide (E7)

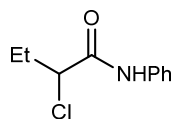

**E7**

According to **General procedure 1** with 2-chlorobutanoyl chloride (5.00 g, 35.7 mmol, 1.2 equiv.) and aniline (2.77 g, 29.8 mmol, 1.0 equiv.), the reaction mixture was purified by column chromatography on silica gel (petroleum ether/EtOAc = 10/1) to yield the product **E7** as a white solid (5.75 g, 98% yield).

**<sup>1</sup>H NMR** (400 MHz, CDCl<sub>3</sub>) δ 8.29 (s, 1H), 7.56 – 7.53 (m, 2H), 7.38 – 7.33 (m, 2H), 7.18 – 7.14 (m, 1H), 4.45 (dd, *J* = 7.7, 4.3 Hz, 1H), 2.28 – 2.18 (m, 1H), 2.15 – 2.04 (m, 1H), 1.11 (t, *J* = 7.3 Hz, 3H).

**<sup>13</sup>C NMR** (100 MHz, CDCl<sub>3</sub>) δ 166.8, 136.9, 129.1, 125.0, 120.0, 63.0, 29.0, 10.3.

**HRMS** (ESI) *m/z* calcd. for C<sub>10</sub>H<sub>13</sub>ClNO [*M* + *H*]<sup>+</sup> 198.0680, found 198.0679.

### 2-Chloro-*N*-phenylhexanamide (E8)

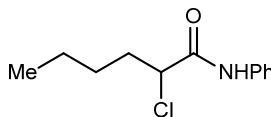

**E8**

According to **General procedure 2** with hexanoic acid (1.16 g, 10.0 mmol, 1.0 equiv.) and aniline (0.93 g, 10.0 mmol, 1.0 equiv.), the reaction mixture was purified by column chromatography on silica gel (petroleum ether/EtOAc = 20/1) to yield the product **E8** as a yellowish oil (1.36 g, 60% overall yield).

**<sup>1</sup>H NMR** (400 MHz, CDCl<sub>3</sub>) δ 8.31 (s, 1H), 7.56 – 7.53 (m, 2H), 7.37 – 7.32 (m, 2H), 7.17 – 7.13 (m, 1H), 4.46 (dd, *J* = 8.3, 4.4 Hz, 1H), 2.23 – 2.15 (m, 1H), 2.06 – 1.97 (m, 1H), 1.57 – 1.45 (m, 2H), 1.44 – 1.32 (m, 2H), 0.92 (t, *J* = 7.3 Hz, 3H).

**<sup>13</sup>C NMR** (100 MHz, CDCl<sub>3</sub>) δ 167.0, 136.9, 129.0, 125.0, 120.0, 61.6, 35.4, 28.0, 22.0, 13.8.

**HRMS** (ESI) *m/z* calcd. for C<sub>12</sub>H<sub>17</sub>ClNO [*M* + *H*]<sup>+</sup> 226.0993, found 226.0990.

### 2-Chloro-4-methyl-*N*-phenylpentanamide (E9)

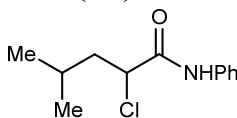

**E9**

According to **General procedure 2** with 4-methylpentanoic acid (2.32 g, 20.0 mmol, 1.0 equiv.) and aniline (1.86 g, 20.0 mmol, 1.0 equiv.), the reaction mixture was purified by column chromatography on silica gel (petroleum ether/EtOAc = 10/1) to yield the product **E9** as a white solid (3.51 g, 78% overall yield).

**<sup>1</sup>H NMR** (400 MHz, CDCl<sub>3</sub>) δ 8.27 (s, 1H), 7.56 – 7.53 (m, 2H), 7.37 – 7.32 (m, 2H), 7.17 – 7.13 (m, 1H), 4.47 (dd, *J* = 10.1, 4.1 Hz, 1H), 2.07 – 1.85 (m, 3H), 1.01 – 0.96 (m, 6H).

**<sup>13</sup>C NMR** (100 MHz, CDCl<sub>3</sub>) δ 167.4, 137.0, 129.1, 125.0, 120.0, 60.1, 44.4, 25.3, 22.9, 20.8.

**HRMS** (ESI) *m/z* calcd. for C<sub>12</sub>H<sub>17</sub>ClNO [*M* + *H*]<sup>+</sup> 226.0993, found 226.0990.

### 2-Chloro-*N*,5-diphenylpentanamide (E10)

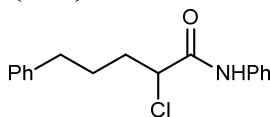

**E10**

According to **General procedure 3** with 5-phenylpentanoic acid (1.78 g, 10.0 mmol, 1.0 equiv.) and aniline (0.93 g, 10.0 mmol, 1.0 equiv.), the reaction mixture was purified by column chromatography on silica gel (petroleum ether/EtOAc = 10/1) to yield the product **E10** as a white solid (1.21 g, 42% overall yield).

**<sup>1</sup>H NMR** (400 MHz, CDCl<sub>3</sub>) δ 8.28 (s, 1H), 7.54 – 7.51 (m, 2H), 7.35 – 7.30 (m, 2H), 7.29 – 7.25 (m, 2H), 7.20 – 7.12 (m, 4H), 4.46 (dd, *J* = 8.3, 4.4 Hz, 1H), 2.72 – 2.60 (m, 2H), 2.27 – 2.18 (m, 1H), 2.10 – 2.01 (m, 1H), 1.94 – 1.77 (m, 2H).

**<sup>13</sup>C NMR** (100 MHz, CDCl<sub>3</sub>) δ 166.8, 141.4, 136.8, 129.0, 128.4, 128.3, 126.0, 125.0, 120.0, 61.3, 35.1, 35.0, 27.7.

**HRMS** (ESI) *m/z* calcd. for C<sub>17</sub>H<sub>19</sub>ClNO [*M* + *H*]<sup>+</sup> 288.1150, found 288.1146.

### 2-Chloro-*N*-phenylhex-5-enamide (E11)

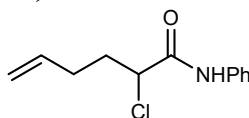

**E11**

According to **General procedure 3** with hex-5-enoic acid (1.14 g, 10.0 mmol, 1.0 equiv.) and aniline (0.93 g, 10.0 mmol, 1.0 equiv.), the reaction mixture was purified by column chromatography on silica gel (petroleum ether/EtOAc = 10/1) to yield the product **E11** as a white solid (0.98 g, 44% overall yield).

**<sup>1</sup>H NMR** (400 MHz, CDCl<sub>3</sub>) δ 8.29 (s, 1H), 7.56 – 7.53 (m, 2H), 7.38 – 7.33 (m, 2H), 7.18 – 7.14 (m, 1H), 5.85 – 5.75 (m, 1H), 5.14 – 5.04 (m, 2H), 4.48 (dd, *J* = 8.8, 3.3 Hz, 1H), 2.37 – 2.27 (m, 3H), 2.16 – 2.05 (m, 1H).

**<sup>13</sup>C NMR** (100 MHz, CDCl<sub>3</sub>) δ 166.8, 136.9, 136.2, 129.1, 125.1, 120.0, 116.4, 60.8, 34.6, 30.0.

**HRMS** (ESI) *m/z* calcd. for C<sub>12</sub>H<sub>15</sub>ClNO [*M* + *H*]<sup>+</sup> 224.0837, found 224.0834.

### 2-Chloro-*N*,6-diphenylhex-5-ynamide (E12)

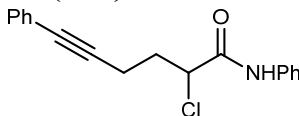

**E12**

According to **General procedure 3** with 6-phenylhex-5-ynoic acid (0.86 g, 4.6 mmol, 1.0 equiv.) and aniline (0.43 g, 4.6 mmol, 1.0 equiv.), the reaction mixture was purified by column chromatography on silica gel (petroleum ether/EtOAc = 10/1) to yield the product **E12** as a white solid (0.86 g, 63% overall yield).

**<sup>1</sup>H NMR** (400 MHz, CDCl<sub>3</sub>) δ 8.29 (s, 1H), 7.56 – 7.53 (m, 2H), 7.39 – 7.32 (m, 4H), 7.29 – 7.25 (m, 3H), 7.18 – 7.14 (m, 1H), 4.70 (dd, *J* = 9.1, 4.1 Hz, 1H), 2.73 – 2.69 (m, 2H), 2.62 – 2.53 (m, 1H), 2.30 – 2.21 (m, 1H).

**<sup>13</sup>C NMR** (100 MHz, CDCl<sub>3</sub>) δ 166.4, 136.8, 131.6, 129.1, 128.2, 127.9, 125.1, 123.3, 120.0,

87.2, 82.1, 60.0, 34.3, 16.6.

**HRMS** (ESI)  $m/z$  calcd. for  $C_{18}H_{17}ClNO$   $[M + H]^+$  298.0993, found 298.0990.

### 2-Chloro-4-(1,3-dioxoisindolin-2-yl)-*N*-phenylbutanamide (**E13**)

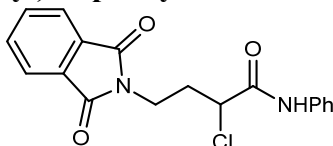

**E13**

According to **General procedure 2** with 4-(1,3-dioxoisindolin-2-yl)butanoic acid (2.33 g, 10.0 mmol, 1.0 equiv.) and aniline (0.93 g, 10.0 mmol, 1.0 equiv.), the reaction mixture was purified by column chromatography on silica gel (petroleum ether/EtOAc = 3/1) to yield the product **E13** as a yellowish solid (2.31 g, 68% overall yield).

**$^1H$  NMR** (400 MHz,  $CDCl_3$ )  $\delta$  8.41 (s, 1H), 7.82 – 7.78 (m, 2H), 7.71 – 7.66 (m, 2H), 7.53 – 7.50 (m, 2H), 7.32 – 7.28 (m, 2H), 7.14 – 7.10 (m, 1H), 4.52 (dd,  $J$  = 7.3, 5.2 Hz, 1H), 4.01 – 3.89 (m, 2H), 2.66 – 2.58 (m, 1H), 2.51 – 2.42 (m, 1H).

**$^{13}C$  NMR** (100 MHz,  $CDCl_3$ )  $\delta$  168.3, 165.8, 136.8, 134.1, 131.9, 129.0, 125.0, 123.3, 119.9, 58.3, 34.8, 34.2.

**HRMS** (ESI)  $m/z$  calcd. for  $C_{18}H_{16}ClN_2O_3$   $[M + H]^+$  343.0844, found 343.0838.

### 2-Chloro-4-phenoxy-*N*-phenylbutanamide (**E14**)

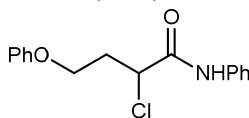

**E14**

According to **General procedure 3** with 4-phenoxybutanoic acid (1.80 g, 10.0 mmol, 1.0 equiv.) and aniline (0.93 g, 10.0 mmol, 1.0 equiv.), the reaction mixture was purified by column chromatography on silica gel (petroleum ether/EtOAc = 5/1) to yield the product **E14** as a white solid (1.13 g, 39% overall yield).

**$^1H$  NMR** (400 MHz,  $CDCl_3$ )  $\delta$  8.30 (s, 1H), 7.55 – 7.52 (m, 2H), 7.36 – 7.31 (m, 2H), 7.29 – 7.23 (m, 2H), 7.17 – 7.13 (m, 1H), 6.96 – 6.93 (m, 1H), 6.89 – 6.86 (m, 2H), 4.77 (dd,  $J$  = 8.6, 4.5 Hz, 1H), 4.20 – 4.17 (m, 2H), 2.78 – 2.70 (m, 1H), 2.45 – 2.37 (m, 1H).

**$^{13}C$  NMR** (100 MHz,  $CDCl_3$ )  $\delta$  166.6, 158.4, 136.9, 129.5, 129.1, 125.1, 121.0, 120.1, 114.5, 63.5, 57.7, 34.9.

**HRMS** (ESI)  $m/z$  calcd. for  $C_{16}H_{17}ClNO_2$   $[M + H]^+$  290.0942, found 290.0939.

### 2-Chloro-4-(methylthio)-*N*-phenylbutanamide (**E15**)

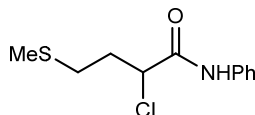

**E15**

According to **General procedure 4** with DL-methionine (1.49 g, 10.0 mmol, 1.0 equiv.) and aniline (0.93 g, 10.0 mmol, 1.0 equiv.), the reaction mixture was purified by column chromatography on silica gel (petroleum ether/EtOAc = 10/1) to yield the product **E15** as a white



solid (0.83 g, 34% overall yield).

**<sup>1</sup>H NMR** (400 MHz, CDCl<sub>3</sub>) δ 8.31 (s, 1H), 7.56 – 7.53 (m, 2H), 7.38 – 7.33 (m, 2H), 7.19 – 7.15 (m, 1H), 4.69 (dd, *J* = 8.8, 4.0 Hz, 1H), 2.79 – 2.66 (m, 2H), 2.57 – 2.48 (m, 1H), 2.31 – 2.22 (m, 1H), 2.12 (s, 3H).

**<sup>13</sup>C NMR** (100 MHz, CDCl<sub>3</sub>) δ 166.4, 136.8, 129.1, 125.1, 120.0, 59.6, 34.4, 30.4, 15.2.

**HRMS** (ESI) *m/z* calcd. for C<sub>11</sub>H<sub>15</sub>ClNOS [M + H]<sup>+</sup> 224.0557, found 244.0555.

### 2-Chloro-5,5,5-trifluoro-*N*-phenylpentanamide (E16)

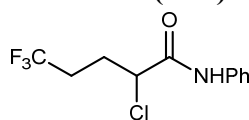

**E16**

According to **General procedure 2** with 5,5,5-trifluoropentanoic acid (1.00 g, 6.41 mmol, 1.0 equiv.) and aniline (1.86 g, 6.41 mmol, 1.0 equiv.), the reaction mixture was purified by column chromatography on silica gel (petroleum ether/EtOAc = 10/1) to yield the product **E16** as a yellowish solid (0.82 g, 48% overall yield).

**<sup>1</sup>H NMR** (400 MHz, CDCl<sub>3</sub>) δ 8.33 (s, 1H), 7.54 – 7.51 (m, 2H), 7.38 – 7.33 (m, 2H), 7.20 – 7.15 (m, 1H), 4.54 – 4.47 (m, 1H), 2.54 – 2.25 (m, 4H).

**<sup>13</sup>C NMR** (100 MHz, CDCl<sub>3</sub>) δ 165.6, 136.5, 129.1, 126.5 (q, *J* = 274.5 Hz), 125.4, 120.2, 59.0, 30.5 (q, *J* = 29.4 Hz), 28.1 (q, *J* = 3.3 Hz).

**<sup>19</sup>F NMR** (376 MHz, CDCl<sub>3</sub>) δ -66.09 (s, 3F).

**HRMS** (ESI) *m/z* calcd. for C<sub>11</sub>H<sub>12</sub>ClF<sub>3</sub>NO [M + H]<sup>+</sup> 266.0554, found 266.0550.

### Methyl 4-chloro-5-oxo-5-(phenylamino)pentanoate (E17)

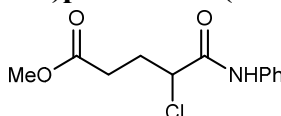

**E17**

According to **General procedure 2** with 5-methoxy-5-oxopentanoic acid (1.46 g, 10.0 mmol, 1.0 equiv.) and aniline (0.93 g, 10.0 mmol, 1.0 equiv.), the reaction mixture was purified by column chromatography on silica gel (petroleum ether/EtOAc = 5/1) to yield the product **E17** as a yellowish solid (1.21 g, 47% overall yield).

**<sup>1</sup>H NMR** (400 MHz, CDCl<sub>3</sub>) δ 8.28 (s, 1H), 7.56 – 7.52 (m, 2H), 7.37 – 7.32 (m, 2H), 7.18 – 7.14 (m, 1H), 4.60 – 4.57 (m, 1H), 3.69 (s, 3H), 2.61 – 2.50 (m, 3H), 2.41 – 2.29 (m, 1H).

**<sup>13</sup>C NMR** (100 MHz, CDCl<sub>3</sub>) δ 172.6, 166.1, 136.8, 129.1, 125.1, 120.1, 59.9, 51.8, 30.6, 30.3.

**HRMS** (ESI) *m/z* calcd. for C<sub>12</sub>H<sub>15</sub>ClNO<sub>3</sub> [M + H]<sup>+</sup> 256.0735, found 256.0733.

### 2-Chloro-*N*,2-diphenylacetamide (E18)

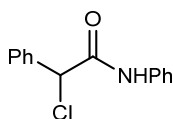

**E18**

According to **General procedure 1** with 2-chloro-2-phenylacetyl chloride (1.88 g, 10.0 mmol, 1.0 equiv.) and aniline (1.12 g, 12.0 mmol, 1.2 equiv.), the reaction mixture was purified by

column chromatography on silica gel (petroleum ether/EtOAc = 10/1) to yield the product **E18** as a white solid (2.02 g, 82% yield).

**<sup>1</sup>H NMR** (400 MHz, CDCl<sub>3</sub>) δ 8.42 (s, 1H), 7.56 – 7.54 (m, 2H), 7.50 – 7.47 (m, 2H), 7.41 – 7.31 (m, 5H), 7.18 – 7.13 (m, 1H), 5.49 (s, 1H).

**<sup>13</sup>C NMR** (100 MHz, CDCl<sub>3</sub>) δ 165.3, 136.8, 136.6, 129.3, 129.1, 129.0, 127.8, 125.2, 120.0, 62.0.

**HRMS** (ESI) m/z calcd. for C<sub>14</sub>H<sub>13</sub>ClNO [M + H]<sup>+</sup> 246.0680, found 246.0681.

### 2-Chloro-2-(3-methoxyphenyl)-N-phenylacetamide (**E19**)

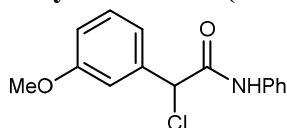

**E19**

According to **General procedure 3** with 2-(3-methoxyphenyl)acetic acid (1.66 g, 10.0 mmol, 1.0 equiv.) and aniline (0.93 g, 10.0 mmol, 1.0 equiv.), the reaction mixture was purified by column chromatography on silica gel (petroleum ether/EtOAc = 5/1) to yield the product **E19** as a white solid (0.80 g, 29% overall yield).

**<sup>1</sup>H NMR** (400 MHz, CDCl<sub>3</sub>) δ 8.34 (s, 1H), 7.56 – 7.54 (m, 2H), 7.37 – 7.29 (m, 3H), 7.18 – 7.14 (m, 1H), 7.10 – 7.07 (m, 1H), 7.04 – 7.03 (m, 1H), 6.92 – 6.89 (m, 1H), 5.46 (s, 1H), 3.81 (s, 3H).

**<sup>13</sup>C NMR** (100 MHz, CDCl<sub>3</sub>) δ 165.2, 159.9, 138.0, 136.8, 130.1, 129.1, 125.2, 120.00, 119.98, 114.8, 113.5, 62.0, 55.3.

**HRMS** (ESI) m/z calcd. for C<sub>15</sub>H<sub>15</sub>ClNO<sub>2</sub> [M + H]<sup>+</sup> 276.0786, found 276.0787.

### 2-Chloro-2-(naphthalen-2-yl)-N-phenylacetamide (**E20**)

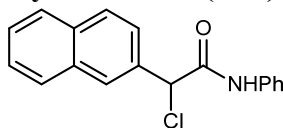

**E20**

According to **General procedure 3** with 2-(naphthalen-2-yl)acetic acid (0.93 g, 5.0 mmol, 1.0 equiv.) and aniline (0.47 g, 5.0 mmol, 1.0 equiv.), the reaction mixture was purified by column chromatography on silica gel (petroleum ether/EtOAc = 10/1) to yield the product **E20** as a white solid (0.35 g, 24% overall yield).

**<sup>1</sup>H NMR** (400 MHz, CDCl<sub>3</sub>) δ 8.45 (s, 1H), 7.96 (s, 1H), 7.88 – 7.82 (m, 3H), 7.59 – 7.56 (m, 3H), 7.54 – 7.49 (m, 2H), 7.37 – 7.33 (m, 2H), 7.19 – 7.14 (m, 1H), 5.67 (s, 1H).

**<sup>13</sup>C NMR** (100 MHz, CDCl<sub>3</sub>) δ 165.2, 136.8, 133.8, 133.4, 133.0, 129.2, 129.1, 128.2, 127.7, 127.6, 127.0, 126.7, 125.2, 124.6, 120.0, 62.4.

**HRMS** (ESI) m/z calcd. for C<sub>18</sub>H<sub>15</sub>ClNO [M + H]<sup>+</sup> 296.0837, found 296.0838.

### 2-Chloro-2-(naphthalen-1-yl)-N-phenylacetamide (**E21**)

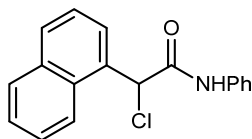

**E21**

According to **General procedure 3** with 2-(naphthalen-1-yl)acetic acid (0.93 g, 5.0 mmol, 1.0 equiv.) and aniline (0.47 g, 5.0 mmol, 1.0 equiv.), the reaction mixture was purified by column chromatography on silica gel (petroleum ether/EtOAc = 10/1) to yield the product **E21** as a white solid (0.25 g, 17% overall yield).

**<sup>1</sup>H NMR** (400 MHz, CDCl<sub>3</sub>) δ 8.52 (s, 1H), 8.14 – 8.12 (m, 1H), 7.92 – 7.89 (m, 2H), 7.68 – 7.66 (m, 1H), 7.62 – 7.52 (m, 4H), 7.49 – 7.45 (m, 1H), 7.38 – 7.34 (m, 2H), 7.20 – 7.16 (m, 1H), 6.22 (s, 1H).

**<sup>13</sup>C NMR** (100 MHz, CDCl<sub>3</sub>) δ 165.5, 136.9, 134.1, 132.5, 130.7, 130.5, 129.14, 129.11, 127.2, 126.6, 126.3, 125.3, 123.1, 120.0, 59.8.

**HRMS** (ESI) *m/z* calcd. for C<sub>18</sub>H<sub>15</sub>ClNO [M + H]<sup>+</sup> 296.0837, found 296.0838.

***N*-(3,5-Bis(trifluoromethyl)phenyl)-2-chloro-2-phenylbutanamide (E22)**

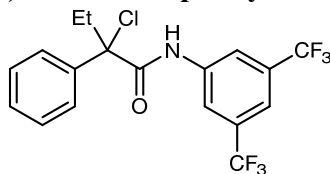

**E22**

According to **General procedure 5** with 2-phenylbutanoic acid (4.92 g, 30.0 mmol, 1.0 equiv.) and 3,5-bis(trifluoromethyl)aniline (6.87 g, 30.0 mmol, 1.0 equiv.), the reaction mixture was purified by column chromatography on silica gel (petroleum ether/EtOAc = 20/1) to yield the product **E22** as a white solid (8.22 g, 67% overall yield).

**<sup>1</sup>H NMR** (400 MHz, CDCl<sub>3</sub>) δ 8.61 (s, 1H), 8.05 (s, 2H), 7.62 – 7.58 (m, 3H), 7.41 – 7.32 (m, 3H), 2.68 – 2.59 (m, 1H), 2.48 – 2.39 (m, 1H), 1.05 (t, *J* = 7.2 Hz, 3H).

**<sup>13</sup>C NMR** (100 MHz, CDCl<sub>3</sub>) δ 168.8, 139.3, 138.6, 132.4 (q, *J* = 33.4 Hz), 128.78, 128.75, 126.2, 122.9 (q, *J* = 271.3 Hz), 119.58 – 119.55 (m), 118.2 – 118.0 (m), 79.1, 34.9, 9.3.

**<sup>19</sup>F NMR** (376 MHz, CDCl<sub>3</sub>) δ -63.02 (s, 6F).

**HRMS** (ESI) *m/z* calcd. for C<sub>18</sub>H<sub>15</sub>ClF<sub>6</sub>NO [M + H]<sup>+</sup> 410.0741, found 410.0738.

***N*-(3,5-Bis(trifluoromethyl)phenyl)-2-chloro-2-phenylhexanamide (E23)**

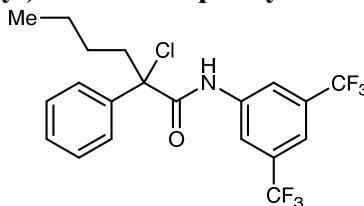

**E23**

According to **General procedure 6** with 2-phenylacetic acid (1.36 g, 10.0 mmol, 1.0 equiv.), 1-iodobutane (1.93 g, 10.5 mmol, 1.05 equiv.), and 3,5-bis(trifluoromethyl)aniline (2.29 g, 10.0 mmol, 1.0 equiv.), the reaction mixture was purified by column chromatography on silica gel (petroleum ether/EtOAc = 20/1) to yield the product **E23** as a white solid (2.63 g, 60% overall

yield).

**<sup>1</sup>H NMR** (400 MHz, CDCl<sub>3</sub>) δ 8.59 (s, 1H), 8.05 (s, 2H), 7.63 – 7.58 (m, 3H), 7.42 – 7.33 (m, 3H), 2.62 – 2.55 (m, 1H), 2.42 – 2.35 (m, 1H), 1.50 – 1.31 (m, 4H), 0.91 (t, *J* = 7.0 Hz, 3H).

**<sup>13</sup>C NMR** (100 MHz, CDCl<sub>3</sub>) δ 168.8, 139.6, 138.6, 132.5 (q, *J* = 33.5 Hz), 128.8, 126.1, 123.0 (q, *J* = 271.2 Hz), 119.6 – 119.5 (m), 118.2 – 118.1 (m), 78.4, 41.5, 27.0, 22.5, 13.8.

**<sup>19</sup>F NMR** (376 MHz, CDCl<sub>3</sub>) δ -63.04 (s, 6F).

**HRMS** (ESI) *m/z* calcd. for C<sub>20</sub>H<sub>17</sub>ClF<sub>6</sub>NO [M – H]<sup>–</sup> 436.0908, found 436.0904.

#### ***N*-(3,5-Bis(trifluoromethyl)phenyl)-2-chloro-2-phenylpent-4-enamide (E24)**

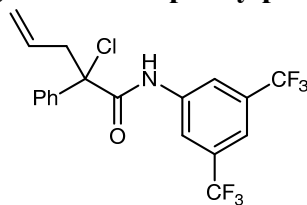

**E24**

According to **General procedure 6** with 2-phenylacetic acid (1.36 g, 10.0 mmol, 1.0 equiv.), 3-bromoprop-1-ene (1.26 g, 10.5 mmol, 1.05 equiv.) and 3,5-bis(trifluoromethyl)aniline (2.29 g, 20.0 mmol, 1.0 equiv.), the reaction mixture was purified by column chromatography on silica gel (petroleum ether/EtOAc = 20/1) to yield the product **E24** as a white solid (1.31 g, 31% overall yield).

**<sup>1</sup>H NMR** (400 MHz, CDCl<sub>3</sub>) δ 8.54 (s, 1H), 8.05 (s, 2H), 7.64 (s, 1H), 7.61 – 7.58 (m, 2H), 7.44 – 7.35 (m, 3H), 5.84 – 5.74 (m, 1H), 5.24 – 5.17 (m, 2H), 3.39 – 3.33 (m, 1H), 3.18 – 3.12 (m, 1H).

**<sup>13</sup>C NMR** (100 MHz, CDCl<sub>3</sub>) δ 168.3, 138.9, 138.5, 132.5 (q, *J* = 33.4 Hz), 131.5, 128.9, 128.8, 126.2, 122.9 (q, *J* = 271.3 Hz), 120.6, 119.61 – 119.56 (m), 118.3 – 118.2 (m), 76.8, 45.9.

**<sup>19</sup>F NMR** (376 MHz, CDCl<sub>3</sub>) δ -63.00 (s, 6F).

**HRMS** (ESI) *m/z* calcd. for C<sub>19</sub>H<sub>13</sub>ClF<sub>6</sub>NO [M – H]<sup>–</sup> 420.0595, found 420.0594.

#### ***N*-(3,5-Bis(trifluoromethyl)phenyl)-2-(4-(*tert*-butyl)phenyl)-2-chlorobutanamide (E25)**

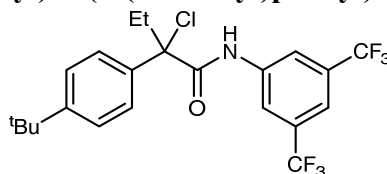

**E25**

According to **General procedure 6** with 2-(4-(*tert*-butyl)phenyl)acetic acid (1.92 g, 10.0 mmol, 1.0 equiv.), iodoethane (1.64 g, 10.5 mmol, 1.05 equiv.), and 3,5-bis(trifluoromethyl)aniline (2.29 g, 10.0 mmol, 1.0 equiv.), the reaction mixture was purified by column chromatography on silica gel (petroleum ether/EtOAc = 20/1) to yield the product **E25** as a white solid (2.51 g, 54% overall yield).

**<sup>1</sup>H NMR** (400 MHz, CDCl<sub>3</sub>) δ 8.63 (s, 1H), 8.07 (s, 2H), 7.63 (s, 1H), 7.52 – 7.49 (m, 2H), 7.42 – 7.39 (m, 2H), 2.65 (dq, *J* = 14.3, 7.1 Hz, 1H), 2.42 (dq, *J* = 14.5, 7.2 Hz, 1H), 1.31 (s, 9H), 1.07 (t, *J* = 7.2 Hz, 3H).

**<sup>13</sup>C NMR** (100 MHz, CDCl<sub>3</sub>) δ 168.9, 151.9, 138.7, 136.4, 132.4 (q, *J* = 33.4 Hz), 125.9, 125.7, 123.0 (q, *J* = 271.3 Hz), 119.6 – 119.5 (m), 118.2 – 118.0 (m), 79.2, 34.8, 34.6, 31.2, 9.5.

**<sup>19</sup>F NMR** (376 MHz, CDCl<sub>3</sub>) δ -62.99 (s, 6F).

**HRMS** (ESI) *m/z* calcd. for C<sub>22</sub>H<sub>21</sub>ClF<sub>6</sub>NO [M – H]<sup>–</sup> 464.1221, found 464.1216.

***N*-(3,5-Bis(trifluoromethyl)phenyl)-2-chloro-2-(3-methoxyphenyl)butanamide (E26)**

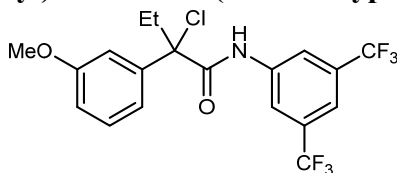

**E26**

According to **General procedure 6** with 2-(3-methoxyphenyl)acetic acid (1.66 g, 10.0 mmol, 1.0 equiv.), iodoethane (1.64 g, 10.5 mmol, 1.05 equiv.), and 3,5-bis(trifluoromethyl)aniline (2.29 g, 20.0 mmol, 1.0 equiv.), the reaction mixture was purified by column chromatography on silica gel (petroleum ether/EtOAc = 10/1) to yield the product **E26** as a white solid (1.02 g, 23% overall yield).

**<sup>1</sup>H NMR** (400 MHz, CDCl<sub>3</sub>) δ 8.50 (s, 1H), 8.05 (s, 2H), 7.63 (s, 1H), 7.34 – 7.30 (m, 1H), 7.17 – 7.14 (m, 2H), 6.91 – 6.88 (m, 1H), 3.83 (s, 3H), 2.62 (dq, *J* = 13.9, 7.1 Hz, 1H), 2.43 (dq, *J* = 14.0, 7.1 Hz, 1H), 1.04 (t, *J* = 7.2 Hz, 3H).

**<sup>13</sup>C NMR** (100 MHz, CDCl<sub>3</sub>) δ 168.7, 159.8, 140.7, 138.6, 132.4 (q, *J* = 33.4 Hz), 129.9, 123.0 (q, *J* = 271.2 Hz), 119.53 – 119.49 (m), 118.4, 118.2 – 118.0 (m), 113.6, 112.8, 78.8, 55.4, 34.8, 9.3.

**<sup>19</sup>F NMR** (376 MHz, CDCl<sub>3</sub>) δ -63.00 (s, 6F).

**HRMS** (ESI) *m/z* calcd. for C<sub>19</sub>H<sub>15</sub>ClF<sub>6</sub>NO<sub>2</sub> [M – H]<sup>–</sup> 438.0701, found 438.0698.

***N*-(3,5-Bis(trifluoromethyl)phenyl)-2-chloro-2-(naphthalen-2-yl)butanamide (E27)**

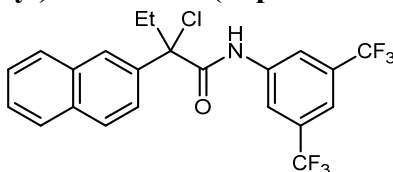

**E27**

According to **General procedure 6** with 2-(naphthalen-2-yl)acetic acid (1.86 g, 10.0 mmol, 1.0 equiv.), iodoethane (1.64 g, 10.5 mmol, 1.05 equiv.), and 3,5-bis(trifluoromethyl)aniline (2.29 g, 10.0 mmol, 1.0 equiv.), the reaction mixture was purified by column chromatography on silica gel (petroleum ether/EtOAc = 20/1) to yield the product **E27** as a white solid (1.67 g, 36% overall yield).

**<sup>1</sup>H NMR** (400 MHz, CDCl<sub>3</sub>) δ 8.56 (s, 1H), 8.10 (d, *J* = 1.5 Hz, 1H), 8.05 (s, 2H), 7.90 – 7.81 (m, 3H), 7.63 – 7.60 (m, 2H), 7.55 – 7.51 (m, 2H), 2.73 (dq, *J* = 14.3, 7.1 Hz, 1H), 2.56 (dq, *J* = 14.5, 7.2 Hz, 1H), 1.08 (t, *J* = 7.2 Hz, 3H).

**<sup>13</sup>C NMR** (100 MHz, CDCl<sub>3</sub>) δ 168.8, 138.6, 136.3, 133.0, 132.8, 132.4 (q, *J* = 33.4 Hz), 128.8, 128.5, 127.5, 127.1, 126.8, 125.7, 123.6, 122.9 (q, *J* = 271.1 Hz), 119.6 – 119.5 (m), 118.2 – 118.1 (m), 79.2, 34.7, 9.3.

**<sup>19</sup>F NMR** (376 MHz, CDCl<sub>3</sub>) δ -62.99 (s, 6F).

**HRMS** (ESI) *m/z* calcd. for C<sub>22</sub>H<sub>15</sub>ClF<sub>6</sub>NO [M – H]<sup>–</sup> 458.0752, found 458.0750.

**2-Chloro-*N*-(3,5-dibromophenyl)-2-phenylbutanamide (E28)**

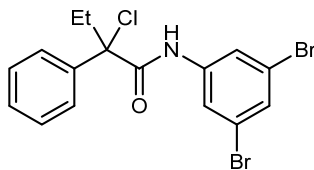

**E28**

According to **General procedure 5** with 2-phenylbutanoic acid (1.36 g, 10.0 mmol, 1.0 equiv.) and 3,5-dibromoaniline (2.49 g, 10.0 mmol, 1.0 equiv.), the reaction mixture was purified by column chromatography on silica gel (petroleum ether/EtOAc = 10/1) to yield the product **E28** as a white solid (3.12 g, 73% overall yield).

**<sup>1</sup>H NMR** (400 MHz, CDCl<sub>3</sub>) δ 8.35 (s, 1H), 7.68 (s, 2H), 7.56 – 7.54 (m, 2H), 7.39 – 7.31 (m, 4H), 2.60 (dq, *J* = 14.3, 7.1 Hz, 1H), 2.39 (dq, *J* = 14.3, 7.1 Hz, 1H), 1.03 (t, *J* = 7.2 Hz, 3H).

**<sup>13</sup>C NMR** (100 MHz, CDCl<sub>3</sub>) δ 168.2, 139.5, 139.1, 130.2, 128.6, 126.1, 123.0, 121.3, 79.1, 34.8, 9.3.

**HRMS** (ESI) *m/z* calcd. for C<sub>16</sub>H<sub>13</sub>Br<sub>2</sub>ClNO [M – H]<sup>–</sup> 427.9058, found 427.9053.

#### ***N*-(4-Bromophenyl)-2-chloro-2-phenylbutanamide (E29)**

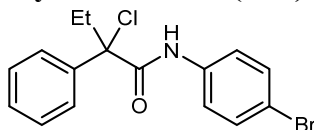

**E29**

According to **General procedure 5** with 2-phenylbutanoic acid (1.36 g, 10.0 mmol, 1.0 equiv.) and 4-bromoaniline (1.71 g, 10.0 mmol, 1.0 equiv.), the reaction mixture was purified by column chromatography on silica gel (petroleum ether/EtOAc = 10/1) to yield the product **E29** as a white solid (2.39 g, 68% overall yield).

**<sup>1</sup>H NMR** (400 MHz, CDCl<sub>3</sub>) δ 8.40 (s, 1H), 7.59 – 7.56 (m, 2H), 7.45 – 7.40 (m, 4H), 7.39 – 7.30 (m, 3H), 2.63 (dq, *J* = 14.2, 7.1 Hz, 1H), 2.40 (dq, *J* = 14.4, 7.2 Hz, 1H), 1.05 (t, *J* = 7.2 Hz, 3H).

**<sup>13</sup>C NMR** (100 MHz, CDCl<sub>3</sub>) δ 168.0, 140.0, 136.2, 131.9, 128.6, 128.5, 126.2, 121.4, 117.5, 79.3, 34.9, 9.4.

**HRMS** (ESI) *m/z* calcd. for C<sub>16</sub>H<sub>16</sub>BrClNO [M + H]<sup>+</sup> 352.0098, found 352.0104.

#### **2-Chloro-*N*-(4-(methylsulfonyl)phenyl)-2-phenylbutanamide (E30)**

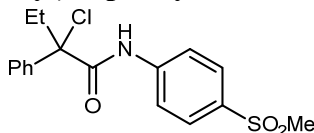

**E30**

According to **General procedure 5** with 2-phenylbutanoic acid (3.28 g, 20.0 mmol, 1.0 equiv.) and 4-(methylsulfonyl)aniline (3.42 g, 20.0 mmol, 1.0 equiv.), the reaction mixture was purified by column chromatography on silica gel (petroleum ether/EtOAc = 3/1) to yield the product **E30** as a white solid (3.90 g, 56% overall yield).

**<sup>1</sup>H NMR** (400 MHz, CDCl<sub>3</sub>) δ 8.56 (s, 1H), 7.90 – 7.87 (m, 2H), 7.77 – 7.73 (m, 2H), 7.60 – 7.57 (m, 2H), 7.42 – 7.32 (m, 3H), 3.02 (s, 3H), 2.63 (dq, *J* = 14.3, 7.1 Hz, 1H), 2.43 (dq, *J* = 14.4, 7.2 Hz, 1H), 1.05 (t, *J* = 7.2 Hz, 3H).

$^{13}\text{C}$  NMR (100 MHz,  $\text{CDCl}_3$ )  $\delta$  168.6, 142.0, 139.5, 136.0, 128.7, 126.2, 119.8, 79.1, 44.6, 34.9, 9.3.

HRMS (ESI)  $m/z$  calcd. for  $\text{C}_{17}\text{H}_{19}\text{ClNO}_3\text{S}$   $[\text{M} + \text{H}]^+$  352.0769, found 352.0771.

***N*-(3,5-Bis(trifluoromethyl)phenyl)-2,5-dichloro-2-phenylpentanamide (E31)**

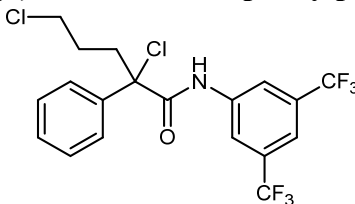

**E31**

According to **General procedure 7** with 2-phenylacetic acid (1.36 g, 10.0 mmol, 1.0 equiv.), 1-bromo-3-chloropropane (1.64 g, 10.5 mmol, 1.05 equiv.), and 3,5-bis(trifluoromethyl)aniline (1.71 g, 10.0 mmol, 1.0 equiv.), the reaction mixture was purified by column chromatography on silica gel (petroleum ether/EtOAc = 2/1) to yield the product **E31** as a white solid (1.83 g, 40% overall yield).

$^1\text{H}$  NMR (400 MHz,  $\text{CDCl}_3$ )  $\delta$  8.45 (s, 1H), 8.04 (s, 2H), 7.64 – 7.60 (m, 3H), 7.45 – 7.36 (m, 3H), 3.62 – 3.52 (m, 2H), 2.73 – 2.66 (m, 1H), 2.63 – 2.55 (m, 1H), 2.05 – 1.84 (m, 2H).

$^{13}\text{C}$  NMR (100 MHz,  $\text{CDCl}_3$ )  $\delta$  168.4, 138.7, 138.5, 132.5 (q,  $J$  = 33.4 Hz), 129.1, 129.0, 126.0, 122.9 (q,  $J$  = 271.2 Hz), 119.6 – 119.5 (m), 118.3 – 118.2 (m), 77.4, 44.3, 39.5, 28.1.

$^{19}\text{F}$  NMR (376 MHz,  $\text{CDCl}_3$ )  $\delta$  -63.00 (s, 6F).

HRMS (ESI)  $m/z$  calcd. for  $\text{C}_{19}\text{H}_{14}\text{Cl}_2\text{F}_6\text{NO}$   $[\text{M} - \text{H}]^+$  456.0362, found 456.0362.

**4-Chlorobutyl 4-(2-chloropropanamido)benzoate (E32)**

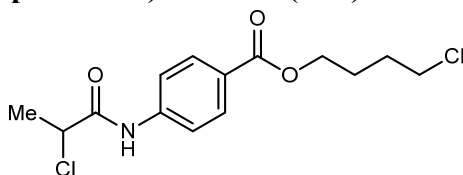

**E32**

According to the literature reported procedure<sup>7</sup> with slightly modification. To a solution of 4-aminobenzoic acid (4.93 g, 36.0 mmol, 1.2 equiv.) in THF (50 mL) was added 2-chloropropanoyl chloride (3.78 g, 30.0 mmol, 1.0 equiv.) dropwise at 0 °C. Then the reaction mixture was warmed up to room temperature and stirred overnight. After completion (monitored by TLC), the reaction was quenched with HCl aqueous solution (1.0 M, 50 mL) and extracted with EtOAc three times. The combined organic phase was washed with brine, dried over  $\text{Na}_2\text{SO}_4$ , filtrated and concentrated to afford the crude product (6.53 g, 96%), which was used directly in the next step without further purification.

To a solution of the above 4-(2-chloropropanamido)benzoic acid (2.27 g, 10.0 mmol, 1.0 equiv.), 1,1'-carbonyldiimidazole (CDI) (1.78 g, 11.0 mmol, 1.1 equiv.), and DMAP (0.12 g, 1.0 mmol, 0.1 equiv.) in  $\text{CH}_2\text{Cl}_2$  (20 mL) was added  $\text{Et}_3\text{N}$  (1.52 g, 15.0 mmol, 1.5 equiv.) dropwise at room temperature. Then the reaction mixture was stirred for 3 h at room temperature. To the resulting solution was added 4-chlorobutan-1-ol (2.16 g, 20.0 mmol, 2.0 equiv.) via syringe at room temperature under argon and stirred overnight. After completion (monitored by TLC), the reaction was quenched with HCl aqueous solution (1.0 M, 20 mL) and extracted with  $\text{CH}_2\text{Cl}_2$

three times. The combined organic phase was washed with brine, dried over Na<sub>2</sub>SO<sub>4</sub>, filtrated and concentrated to afford the crude product, which was purified by flash column chromatography on silica gel (petroleum ether/EtOAc = 5/1) to afford the desired product **E32** as a white solid (2.66 g, 84% yield).

**<sup>1</sup>H NMR** (400 MHz, CDCl<sub>3</sub>) δ 8.54 (s, 1H), 8.04 – 8.01 (m, 2H), 7.68 – 7.65 (m, 2H), 4.56 (q, *J* = 7.0 Hz, 1H), 4.38 – 4.32 (m, 2H), 3.65 – 3.58 (m, 2H), 1.98 – 1.91 (m, 4H), 1.82 (d, *J* = 7.0 Hz, 3H).

**<sup>13</sup>C NMR** (100 MHz, CDCl<sub>3</sub>) δ 167.6, 165.8, 141.1, 130.7, 126.3, 119.1, 64.1, 55.8, 44.4, 29.2, 26.1, 22.3.

**HRMS** (ESI) *m/z* calcd. for C<sub>14</sub>H<sub>18</sub>Cl<sub>2</sub>NO<sub>3</sub> [*M* + *H*]<sup>+</sup> 318.0658, found 318.0658.

### ***N*-Benzyl-2-chloropropanamide (E33)**

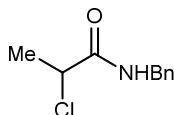

**E33**

According to **General procedure 1** with 2-chloropropionyl chloride (1.51 g, 12.0 mmol, 1.2 equiv.) and benzylamine (1.07 g, 10.0 mmol, 1.0 equiv.), the reaction mixture was purified by column chromatography on silica gel (petroleum ether/EtOAc = 5/1) to yield the product **E33** as a white solid (1.97 g, 100% yield).

**<sup>1</sup>H NMR** (400 MHz, CDCl<sub>3</sub>) δ 7.37 – 7.33 (m, 2H), 7.32 – 7.26 (m, 3H), 6.91 (s, 1H), 4.48 – 4.43 (m, 3H), 1.76 (d, *J* = 7.1 Hz, 3H).

**<sup>13</sup>C NMR** (100 MHz, CDCl<sub>3</sub>) δ 169.4, 137.4, 128.8, 127.7, 127.6, 55.9, 43.8, 22.7.

**HRMS** (ESI) *m/z* calcd. for C<sub>10</sub>H<sub>13</sub>ClNO [*M* + *H*]<sup>+</sup> 198.0680, found 198.0678.

### **2-Chloro-*N*-(4-((4-methylpiperazin-1-yl)methyl)-3-(trifluoromethyl)phenyl)propanamide (E34)**

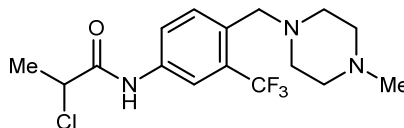

**E34**

According to **General procedure 1** with 2-chloropropanoyl chloride (0.40 g, 3.2 mmol, 1.2 equiv.) and 4-((4-methylpiperazin-1-yl)methyl)-3-(trifluoromethyl)aniline (Ponatinib fragment) (0.74 g, 2.7 mmol, 1.0 equiv.), the reaction mixture was purified by column chromatography on silica gel (CH<sub>2</sub>Cl<sub>2</sub>/CH<sub>3</sub>OH = 20/1) to yield the product **E34** as a colorless liquid (0.43 g, 44% yield).

**<sup>1</sup>H NMR** (400 MHz, CDCl<sub>3</sub>) δ 8.87 (s, 1H), 7.86 – 7.82 (m, 1H), 7.80 – 7.77 (m, 1H), 7.74 – 7.72 (m, 1H), 4.59 (q, *J* = 7.0 Hz, 1H), 3.61 (s, 2H), 2.78 – 2.37 (m, 8H), 2.33 (s, 3H), 1.80 (d, *J* = 7.0 Hz, 3H).

**<sup>13</sup>C NMR** (100 MHz, CDCl<sub>3</sub>) δ 167.9, 135.8, 133.8 (q, *J* = 0.8 Hz), 131.2, 129.0 (q, *J* = 30.4 Hz), 123.8 (q, *J* = 272.6 Hz), 123.1, 117.5 (q, *J* = 6.0 Hz), 57.5 (q, *J* = 1.7 Hz), 55.4, 54.9, 52.6, 45.6, 22.0.

**<sup>19</sup>F NMR** (376 MHz, CDCl<sub>3</sub>) δ -59.45 (s, 3F).

**HRMS** (ESI) *m/z* calcd. for C<sub>16</sub>H<sub>22</sub>ClF<sub>3</sub>N<sub>3</sub>O [*M* + *H*]<sup>+</sup> 364.1398, found 364.1398.



### 2-Chloro-*N*-(4-methoxyphenyl)butanamide (E35)

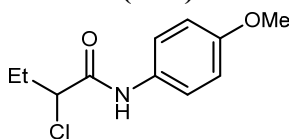

E35

According to **General procedure 1** with 2-chlorobutanoyl chloride (1.68 g, 12.0 mmol, 1.2 equiv.) and 4-methoxyaniline (1.23 g, 10.0 mmol, 1.0 equiv.), the reaction mixture was purified by column chromatography on silica gel (petroleum ether/EtOAc = 5/1) to yield the product **E35** as a white solid (2.27 g, 100% yield).

**<sup>1</sup>H NMR** (400 MHz, CDCl<sub>3</sub>) δ 8.24 (s, 1H), 7.46 – 7.42 (m, 2H), 6.89 – 6.85 (m, 2H), 4.43 (dd, *J* = 7.7, 4.3 Hz, 1H), 3.79 (s, 3H), 2.27 – 2.17 (m, 1H), 2.13 – 2.02 (m, 1H), 1.10 (t, *J* = 7.3 Hz, 3H).

**<sup>13</sup>C NMR** (100 MHz, CDCl<sub>3</sub>) δ 166.7, 156.9, 129.9, 122.0, 114.2, 62.9, 55.4, 29.0, 10.3.

**HRMS** (ESI) *m/z* calcd. for C<sub>11</sub>H<sub>15</sub>ClNO<sub>2</sub> [*M* + *H*]<sup>+</sup> 228.0786, found 228.0788.

### 2-Chloro-*N*-(4-(trifluoromethyl)phenyl)butanamide (E36)

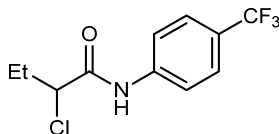

E36

According to **General procedure 1** with 2-chlorobutanoyl chloride (1.68 g, 12.0 mmol, 1.2 equiv.) and 4-(trifluoromethyl)aniline (1.61 g, 10.0 mmol, 1.0 equiv.), the reaction mixture was purified by column chromatography on silica gel (petroleum ether/EtOAc = 10/1) to yield the product **E36** as a white solid (2.61 g, 98% yield).

**<sup>1</sup>H NMR** (400 MHz, CDCl<sub>3</sub>) δ 8.45 (s, 1H), 7.70 – 7.68 (m, 2H), 7.62 – 7.59 (m, 2H), 4.46 (dd, *J* = 7.8, 4.4 Hz, 1H), 2.29 – 2.18 (m, 1H), 2.15 – 2.04 (m, 1H), 1.11 (t, *J* = 7.3 Hz, 3H).

**<sup>13</sup>C NMR** (100 MHz, CDCl<sub>3</sub>) δ 167.2, 139.9, 126.8 (q, *J* = 32.8 Hz), 126.3 (q, *J* = 3.8 Hz), 123.9 (q, *J* = 270.0 Hz), 119.7, 62.8, 29.0, 10.3.

**<sup>19</sup>F NMR** (376 MHz, CDCl<sub>3</sub>) δ -62.25 (s, 3F).

**HRMS** (ESI) *m/z* calcd. for C<sub>11</sub>H<sub>12</sub>ClF<sub>3</sub>NO [*M* + *H*]<sup>+</sup> 266.0554, found 266.0556.

### 2-Chloro-3-cyclohexyl-*N*-phenylpropanamide (E37)

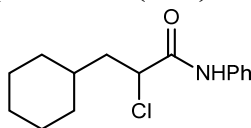

E37

According to **General procedure 2** with 3-cyclohexylpropanoic acid (3.12 g, 20.0 mmol, 1.0 equiv.) and aniline (1.86 g, 20.0 mmol, 1.0 equiv.), the reaction mixture was purified by column chromatography on silica gel (petroleum ether/EtOAc = 20/1) to yield the product **E37** as a white solid (4.09 g, 77% overall yield).

**<sup>1</sup>H NMR** (400 MHz, CDCl<sub>3</sub>) δ 8.28 (s, 1H), 7.56 – 7.53 (m, 2H), 7.37 – 7.32 (m, 2H), 7.17 – 7.13 (m, 1H), 4.50 (dd, *J* = 10.3, 4.2 Hz, 1H), 2.11 – 2.04 (m, 1H), 1.89 – 1.57 (m, 7H), 1.34 – 1.11 (m, 3H), 1.08 – 0.88 (m, 2H).

$^{13}\text{C}$  NMR (100 MHz,  $\text{CDCl}_3$ )  $\delta$  167.5, 137.0, 129.1, 124.9, 120.0, 59.5, 43.0, 34.4, 33.5, 31.5, 26.3, 26.1, 25.9.

HRMS (ESI)  $m/z$  calcd. for  $\text{C}_{15}\text{H}_{21}\text{ClNO}$   $[\text{M} + \text{H}]^+$  266.1306, found 266.1304.

### 2-Chloro-3-methyl-*N*-phenylbutanamide (E38)

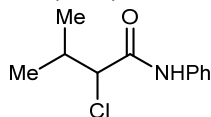

**E38**

According to **General procedure 2** with 3-methylbutanoic acid (2.04 g, 20.0 mmol, 1.0 equiv.) and aniline (1.86 g, 20.0 mmol, 1.0 equiv.), the reaction mixture was purified by column chromatography on silica gel (petroleum ether/EtOAc = 20/1) to yield the product **E38** as a white solid (2.10 g, 50% overall yield).

$^1\text{H}$  NMR (400 MHz,  $\text{CDCl}_3$ )  $\delta$  8.34 (s, 1H), 7.56 – 7.53 (m, 2H), 7.37 – 7.32 (m, 2H), 7.18 – 7.14 (m, 1H), 4.43 (d,  $J$  = 3.7 Hz, 1H), 2.72 – 2.61 (m, 1H), 1.13 (d,  $J$  = 6.8 Hz, 3H), 1.00 (d,  $J$  = 6.7 Hz, 3H).

$^{13}\text{C}$  NMR (100 MHz,  $\text{CDCl}_3$ )  $\delta$  166.6, 136.8, 129.0, 125.0, 120.1, 68.6, 32.5, 20.1, 16.6.

HRMS (ESI)  $m/z$  calcd. for  $\text{C}_{11}\text{H}_{15}\text{ClNO}$   $[\text{M} + \text{H}]^+$  212.0837, found 212.0835.

### 2-Chloro-2-cyclopentyl-*N*-phenylacetamide (E39)

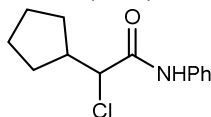

**E39**

According to **General procedure 2** with 2-cyclopentylacetic acid (2.56 g, 20.0 mmol, 1.0 equiv.) and aniline (1.86 g, 20.0 mmol, 1.0 equiv.), the reaction mixture was purified by column chromatography on silica gel (petroleum ether/EtOAc = 10/1) to yield the product **E39** as a white solid (3.43 g, 72% overall yield).

$^1\text{H}$  NMR (400 MHz,  $\text{CDCl}_3$ )  $\delta$  8.20 (s, 1H), 7.55 – 7.52 (m, 2H), 7.36 – 7.32 (m, 2H), 7.17 – 7.13 (m, 1H), 4.46 (d,  $J$  = 5.8 Hz, 1H), 2.75 – 2.65 (m, 1H), 1.88 – 1.77 (m, 2H), 1.75 – 1.46 (m, 6H).

$^{13}\text{C}$  NMR (100 MHz,  $\text{CDCl}_3$ )  $\delta$  166.9, 137.0, 129.0, 125.0, 120.1, 65.8, 44.2, 30.0, 28.3, 25.6, 25.3.

HRMS (ESI)  $m/z$  calcd. for  $\text{C}_{13}\text{H}_{17}\text{ClNO}$   $[\text{M} + \text{H}]^+$  238.0993, found 238.0989.

### 2-Chloro-3,3-dimethyl-*N*-phenylbutanamide (E40)

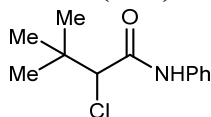

**E40**

According to **General procedure 2** with 3,3-dimethylbutanoic acid (1.16 g, 10.0 mmol, 1.0 equiv.) and aniline (0.93 g, 10.0 mmol, 1.0 equiv.), the reaction mixture was purified by column chromatography on silica gel (petroleum ether/EtOAc = 10/1) to yield the product **E40** as a yellowish solid (0.68 g, 30% overall yield).

**<sup>1</sup>H NMR** (400 MHz, CDCl<sub>3</sub>) δ 8.01 (s, 1H), 7.53 – 7.50 (m, 2H), 7.36 – 7.31 (m, 2H), 7.17 – 7.12 (m, 1H), 4.23 (s, 1H), 1.17 (s, 9H).

**<sup>13</sup>C NMR** (100 MHz, CDCl<sub>3</sub>) δ 165.9, 136.9, 129.0, 124.9, 120.1, 71.5, 35.9, 27.0.

**HRMS** (ESI) m/z calcd. For C<sub>12</sub>H<sub>17</sub>ClNO [M + H]<sup>+</sup> 226.0993, found 226.0991.

**2-Chloro-2-cyclopropyl-*N*-phenylacetamide (E46)**

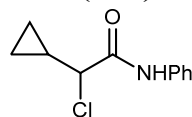

**E46**

According to **General procedure 2** with 2-cyclopropylacetic acid (1.00 g, 25.0 mmol, 1.0 equiv.) and aniline (2.33 g, 25.0 mmol, 1.0 equiv.), the reaction mixture was purified by column chromatography on silica gel (petroleum ether/EtOAc = 10/1) to yield the product **E46** as a white solid (2.19 g, 42% overall yield).

**<sup>1</sup>H NMR** (400 MHz, CDCl<sub>3</sub>) δ 8.19 (s, 1H), 7.57 – 7.54 (m, 2H), 7.37 – 7.32 (m, 2H), 7.17 – 7.13 (m, 1H), 3.93 (d, *J* = 8.9 Hz, 1H), 1.51 – 1.43 (m, 1H), 0.87 – 0.72 (m, 3H), 0.58 – 0.49 (m, 1H).

**<sup>13</sup>C NMR** (100 MHz, CDCl<sub>3</sub>) δ 166.4, 137.0, 129.0, 125.0, 120.0, 65.9, 16.9, 6.3, 4.8.

**HRMS** (ESI) m/z calcd. for C<sub>11</sub>H<sub>13</sub>ClNO [M + H]<sup>+</sup> 210.0680, found 210.0680.

## 6. Enantioconvergent N-alkylation of aliphatic amines and ammonia

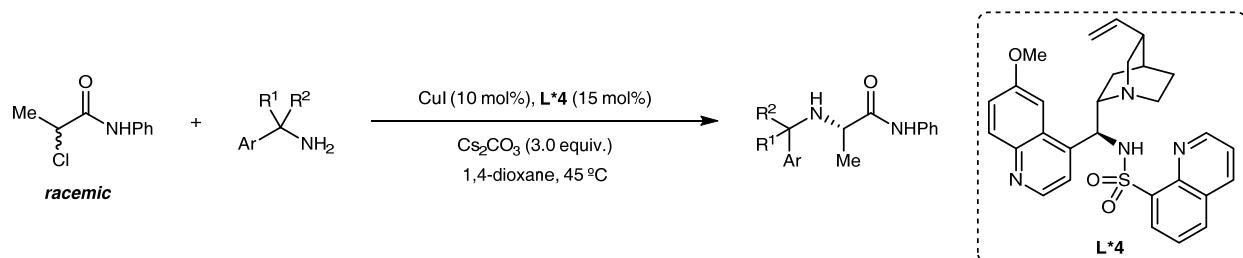

### General procedure A:

Under argon atmosphere, an oven-dried resealable Schlenk tube equipped with a magnetic stir bar was charged with CuI (3.8 mg, 0.02 mmol, 10 mol%), **L\*4** (15.4 mg, 0.03 mmol, 15 mol%), Cs<sub>2</sub>CO<sub>3</sub> (195.5 mg, 0.60 mmol, 3.0 equiv.), and anhydrous 1,4-dioxane (2.0 mL). Then, the mixture was stirred at room temperature for 1 h. After that, alkyl chloride (0.30 mmol, 1.5 equiv.), benzylic primary amine (0.20 mmol, 1.0 equiv.), and anhydrous 1,4-dioxane (2.0 mL) were sequentially added into the mixture and the reaction mixture was stirred at 45 °C for 72 h. Upon completion (monitored by TLC), the precipitate was filtered off and washed by EtOAc. The filtrate was evaporated and the residue was purified by flash column chromatography or preparative thin-layer chromatography on silica gel to afford the desired product.

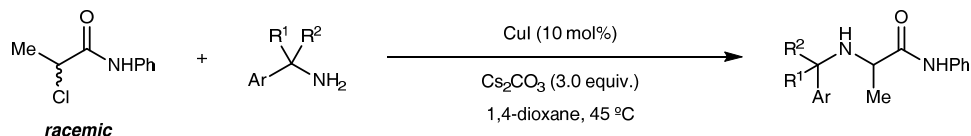

The racemates of products were prepared following the procedure: Under argon atmosphere, an oven-dried resealable Schlenk tube equipped with a magnetic stir bar was charged with CuI (3.8 mg, 0.02 mmol, 10 mol%), Cs<sub>2</sub>CO<sub>3</sub> (195.5 mg, 0.60 mmol, 3.0 equiv.), alkyl chloride (0.30 mmol, 1.5 equiv.), benzylic primary amine (0.20 mmol, 1.0 equiv.), and anhydrous 1,4-dioxane (4.0 mL) were sequentially added into the mixture and the reaction mixture was stirred at 45 °C for 72 h. Upon completion (monitored by TLC), the precipitate was filtered off and washed by EtOAc. The filtrate was evaporated and the residue was purified by flash column chromatography or preparative thin-layer chromatography on silica gel to afford the desired product.

### (S)-2-(Benzylamino)-N-phenylpropanamide (**1**)

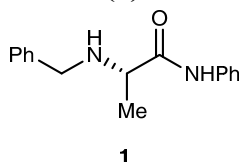

According to **General procedure A** with 2-chloro-N-phenylpropanamide **E1** (54.9 mg, 0.30 mmol, 1.5 equiv.) and benzylamine **A1** (21.4 mg, 0.20 mmol, 1.0 equiv.) for 72 h, the reaction mixture was purified by flash column chromatography on silica gel (petroleum ether/EtOAc = 1/1) to yield the product **1** as a white solid (48.6 mg, 96% yield, 92% e.e.).

[ $\alpha$ ]<sub>D</sub><sup>20</sup> = −8.6 (*c* 1.0, CHCl<sub>3</sub>).

HPLC analysis: Chiralcel IC (*n*-hexane/*i*-PrOH = 90/10, flow rate 1.0 mL/min,  $\lambda$  = 254 nm), *t*<sub>R</sub>

(major) = 12.37 min,  $t_R$  (minor) = 18.59 min.

**A gram-scale experiment:** According to **General Procedure A** with 2-chloro-*N*-phenylpropanamide **E1** (1372.8 mg, 7.5 mmol, 1.5 equiv.) and benzylamine **A1** (535.4 mg, 5.0 mmol, 1.0 equiv.) for 96 h, the reaction mixture was purified by flash column chromatography on silica gel (petroleum ether/EtOAc = 1/1) to yield the product **1** as a white solid (1240.6 mg, 98% yield, 91% e.e.).

**<sup>1</sup>H NMR** (400 MHz, CDCl<sub>3</sub>)  $\delta$  9.38 (s, 1H), 7.59 – 7.57 (m, 2H), 7.37 – 7.26 (m, 7H), 7.11 – 7.08 (m, 1H), 3.81 (s, 2H), 3.36 (q,  $J$  = 7.0 Hz, 1H), 1.80 (s, 1H), 1.40 (d,  $J$  = 7.0 Hz, 3H).

**<sup>13</sup>C NMR** (100 MHz, CDCl<sub>3</sub>)  $\delta$  172.9, 139.1, 137.7, 128.9, 128.7, 128.0, 127.4, 124.0, 119.3, 58.4, 52.7, 19.6.

**HRMS** (ESI)  $m/z$  calcd. for C<sub>16</sub>H<sub>19</sub>N<sub>2</sub>O [M + H]<sup>+</sup> 255.1492, found 255.1490.

**(*R*)-2-(Benzylamino)-*N*-phenylpropanamide ((+)-1)**

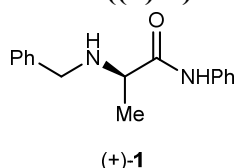

According to **General procedure A** with 2-chloro-*N*-phenylpropanamide **E1** (54.9 mg, 0.30 mmol, 1.5 equiv.), benzylamine **A1** (21.4 mg, 0.20 mmol, 1.0 equiv.), and (8*R*,9*R*)-**L\*4** (15.4 mg, 0.03 mmol, 15 mol%) for 72 h, the reaction mixture was purified by flash column chromatography on silica gel (petroleum ether/EtOAc = 1/1) to yield the product (+)-**1** as a white solid (47.7 mg, 94% yield, 92% e.e.).

$[\alpha]_D^{20}$  = 5.7 ( $c$  1.0, CHCl<sub>3</sub>).

**HPLC** analysis: Chiralcel IC (*n*-hexane/*i*-PrOH = 90/10, flow rate 1.0 mL/min,  $\lambda$  = 254 nm),  $t_R$  (minor) = 12.88 min,  $t_R$  (major) = 20.72 min.

**(*S*)-2-((4-Methoxybenzyl)amino)-*N*-phenylpropanamide (2)**

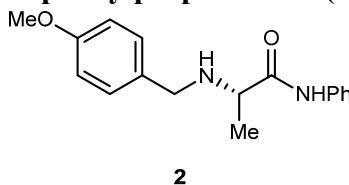

According to **General procedure A** with 2-chloro-*N*-phenylpropanamide **E1** (54.9 mg, 0.30 mmol, 1.5 equiv.) and (4-methoxyphenyl)methanamine **A2** (27.4 mg, 0.20 mmol, 1.0 equiv.) for 72 h, the reaction mixture was purified by flash column chromatography on silica gel (petroleum ether/EtOAc = 2/3) to yield the product **2** as a white solid (44.4 mg, 78% yield, 92% e.e.).

**HPLC** analysis: Chiralcel IC (*n*-hexane/*i*-PrOH = 90/10, flow rate 1.0 mL/min,  $\lambda$  = 254 nm),  $t_R$  (major) = 16.84 min,  $t_R$  (minor) = 26.73 min.

**<sup>1</sup>H NMR** (400 MHz, CDCl<sub>3</sub>)  $\delta$  9.38 (s, 1H), 7.59 – 7.57 (m, 2H), 7.34 – 7.31 (m, 2H), 7.25 – 7.21 (m, 2H), 7.11 – 7.07 (m, 1H), 6.90 – 6.86 (m, 2H), 3.79 (s, 3H), 3.74 (s, 2H), 3.34 (q,  $J$  = 7.0 Hz, 1H), 1.75 (s, 1H), 1.39 (d,  $J$  = 7.0 Hz, 3H).

**<sup>13</sup>C NMR** (100 MHz, CDCl<sub>3</sub>)  $\delta$  173.0, 158.9, 137.8, 131.3, 129.2, 128.9, 124.0, 119.3, 114.1, 58.3, 55.2, 52.2, 19.7.

**HRMS** (ESI)  $m/z$  calcd. for C<sub>17</sub>H<sub>21</sub>N<sub>2</sub>O<sub>2</sub> [M + H]<sup>+</sup> 285.1598, found 285.1594.

**(*S*)-*N*-Phenyl-2-((pyridin-3-ylmethyl)amino)propanamide (3)**

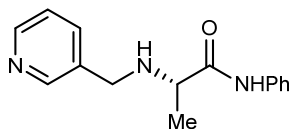

**3**

According to **General Procedure A** with 2-chloro-*N*-phenylpropanamide **E1** (54.9 mg, 0.30 mmol, 1.5 equiv.) and pyridin-3-ylmethanamine **A3** (21.6 mg, 0.20 mmol, 1.0 equiv.) for 72 h, the reaction mixture was purified by preparative thin-layer chromatography on silica gel (EtOAc) to yield the product **3** as a white solid (35.7 mg, 70% yield, 91% e.e.).

**HPLC** analysis: Chiralcel IG (*n*-hexane/*i*-PrOH = 90/10, flow rate 0.8 mL/min,  $\lambda$  = 254 nm),  $t_R$  (major) = 62.10 min,  $t_R$  (minor) = 70.80 min.

**$^1\text{H}$  NMR** (400 MHz,  $\text{CDCl}_3$ )  $\delta$  9.21 (s, 1H), 8.62 – 8.55 (m, 2H), 7.67 – 7.64 (m, 1H), 7.59 – 7.55 (m, 2H), 7.36 – 7.28 (m, 3H), 7.13 – 7.09 (m, 1H), 3.84 (s, 2H), 3.37 (q,  $J$  = 7.0 Hz, 1H), 1.86 (s, 1H), 1.43 (d,  $J$  = 7.0 Hz, 3H).

**$^{13}\text{C}$  NMR** (100 MHz,  $\text{CDCl}_3$ )  $\delta$  172.5, 149.5, 148.9, 137.6, 135.7, 134.6, 129.0, 124.2, 123.6, 119.3, 58.6, 50.1, 19.6.

**HRMS** (ESI)  $m/z$  calcd. for  $\text{C}_{15}\text{H}_{18}\text{N}_3\text{O}$  [ $\text{M} + \text{H}$ ] $^+$  256.1444, found 256.1441.

**(S)-2-((Furan-2-ylmethyl)amino)-*N*-phenylpropanamide (4)**

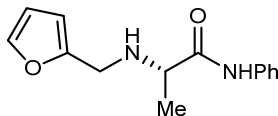

**4**

According to **General procedure A** with 2-chloro-*N*-phenylpropanamide **E1** (54.9 mg, 0.30 mmol, 1.5 equiv.) and furan-2-ylmethanamine **A4** (19.4 mg, 0.20 mmol, 1.0 equiv.) for 72 h, the reaction mixture was purified by flash column chromatography on silica gel (petroleum ether/EtOAc = 3/2) to yield the product **4** as a colorless oil (38.6 mg, 79% yield, 94% e.e.).

**HPLC** analysis: Chiralcel IC (*n*-hexane/*i*-PrOH = 90/10, flow rate 1.0 mL/min,  $\lambda$  = 254 nm),  $t_R$  (major) = 13.09 min,  $t_R$  (minor) = 18.07 min.

**$^1\text{H}$  NMR** (400 MHz,  $\text{CDCl}_3$ )  $\delta$  9.36 (s, 1H), 7.60 – 7.58 (m, 2H), 7.36 – 7.30 (m, 3H), 7.11 – 7.07 (m, 1H), 6.31 – 6.29 (m, 1H), 6.20 – 6.19 (m, 1H), 3.80 (s, 2H), 3.33 (q,  $J$  = 7.0 Hz, 1H), 1.86 (s, 1H), 1.38 (d,  $J$  = 7.0 Hz, 3H).

**$^{13}\text{C}$  NMR** (100 MHz,  $\text{CDCl}_3$ )  $\delta$  172.8, 152.5, 142.3, 137.8, 128.9, 124.0, 119.3, 110.2, 107.5, 58.0, 44.9, 19.7.

**HRMS** (ESI)  $m/z$  calcd. for  $\text{C}_{14}\text{H}_{17}\text{N}_2\text{O}_2$  [ $\text{M} + \text{H}$ ] $^+$  245.1285, found 245.1281.

**(S)-*N*-Phenyl-2-((thiophen-2-ylmethyl)amino)propanamide (5)**

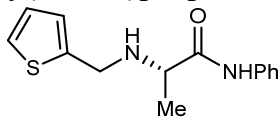

**5**

According to **General Procedure A** with 2-chloro-*N*-phenylpropanamide **E1** (54.9 mg, 0.30 mmol, 1.5 equiv.) and thiophen-2-ylmethanamine **A5** (22.6 mg, 0.20 mmol, 1.0 equiv.) for 72 h, the reaction mixture was purified by flash column chromatography on silica gel (petroleum ether/EtOAc = 3/2) to yield the product **5** as a colorless oil (41.7 mg, 80% yield, 93% e.e.).

**HPLC** analysis: Chiralcel IC (*n*-hexane/*i*-PrOH = 90/10, flow rate 1.0 mL/min,  $\lambda$  = 254 nm),  $t_R$  (major) = 13.31 min,  $t_R$  (minor) = 19.21 min.

**$^1\text{H}$  NMR** (400 MHz,  $\text{CDCl}_3$ )  $\delta$  9.38 (s, 1H), 7.62 – 7.60 (m, 2H), 7.35 – 7.31 (m, 2H), 7.25 – 7.23 (m, 1H), 7.11 – 7.08 (m, 1H), 6.97 – 6.95 (m, 2H), 4.10 – 3.95 (m, 2H), 3.40 (q,  $J$  = 7.0 Hz, 1H), 1.96 (s, 1H), 1.41 (d,  $J$  = 7.0 Hz, 3H).

**$^{13}\text{C}$  NMR** (100 MHz,  $\text{CDCl}_3$ )  $\delta$  172.6, 142.6, 137.7, 128.9, 126.9, 125.4, 124.8, 124.0, 119.3, 58.0, 47.1, 19.4.

**HRMS** (ESI)  $m/z$  calcd. for  $\text{C}_{14}\text{H}_{17}\text{N}_2\text{OS}$  [ $\text{M} + \text{H}$ ] $^+$  261.1056, found 261.1053.

**(*S*)-*N*-Phenyl-2-((thiazol-5-ylmethyl)amino)propanamide (6)**

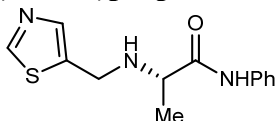

**6**

According to **General Procedure A** with 2-chloro-*N*-phenylpropanamide **E1** (54.9 mg, 0.30 mmol, 1.5 equiv.) and thiazol-5-ylmethanamine **A6** (22.8 mg, 0.20 mmol, 1.0 equiv.) for 72 h, the reaction mixture was purified by preparative thin-layer chromatography on silica gel (petroleum ether/EtOAc = 1/2) to yield the product **6** as a colorless oil (28.7 mg, 55% yield, 94% e.e.).

**HPLC** analysis: Chiralcel IG (*n*-hexane/*i*-PrOH = 80/20, flow rate 1.0 mL/min,  $\lambda$  = 254 nm),  $t_R$  (major) = 16.57 min,  $t_R$  (minor) = 18.34 min.

**$^1\text{H}$  NMR** (400 MHz,  $\text{CDCl}_3$ )  $\delta$  9.20 (s, 1H), 8.77 (s, 1H), 7.77 (s, 1H), 7.60 – 7.58 (m, 2H), 7.36 – 7.34 (m, 2H), 7.14 – 7.09 (m, 1H), 4.17 – 4.01 (m, 2H), 3.40 (q,  $J$  = 7.0 Hz, 1H), 1.94 (s, 1H), 1.43 (d,  $J$  = 7.0 Hz, 3H).

**$^{13}\text{C}$  NMR** (100 MHz,  $\text{CDCl}_3$ )  $\delta$  172.2, 153.1, 141.3, 137.6, 137.1, 129.0, 124.2, 119.3, 58.2, 44.2, 19.4.

**HRMS** (ESI)  $m/z$  calcd. For  $\text{C}_{13}\text{H}_{16}\text{N}_3\text{OS}$  [ $\text{M} + \text{H}$ ] $^+$  262.1009, found 262.1009.

**(*S*)-2-(Benzhydrylamino)-*N*-phenylpropanamide (7)**

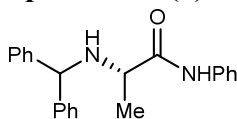

**7**

According to **General Procedure A** with 2-chloro-*N*-phenylpropanamide **E1** (54.9 mg, 0.30 mmol, 1.5 equiv.) and dibenzylamine **A7** (36.6 mg, 0.20 mmol, 1.0 equiv.) for 72 h, the reaction mixture was purified by flash column chromatography on silica gel (petroleum ether/EtOAc = 5/1) to yield the product **7** as a white solid (50.2 mg, 76% yield, 94% e.e.).

**HPLC** analysis: Chiralcel IG (*n*-hexane/*i*-PrOH = 90/10, flow rate 1.0 mL/min,  $\lambda$  = 254 nm),  $t_R$  (major) = 15.40 min,  $t_R$  (minor) = 16.71 min.

**$^1\text{H}$  NMR** (400 MHz,  $\text{CDCl}_3$ )  $\delta$  9.27 (s, 1H), 7.54 – 7.51 (m, 2H), 7.37 – 7.20 (m, 12H), 7.11 – 7.06 (m, 1H), 4.87 (s, 1H), 3.32 (q,  $J$  = 7.0 Hz, 1H), 1.98 (s, 1H), 1.40 (d,  $J$  = 7.0 Hz, 3H).

**$^{13}\text{C}$  NMR** (100 MHz,  $\text{CDCl}_3$ )  $\delta$  172.9, 142.8, 142.6, 137.7, 128.9, 128.8, 128.6, 127.5, 127.4, 127.22, 127.17, 124.0, 119.3, 65.5, 56.6, 19.5.

**HRMS** (ESI)  $m/z$  calcd. for  $\text{C}_{22}\text{H}_{23}\text{N}_2\text{O}$  [ $\text{M} + \text{H}$ ] $^+$  331.1805, found 331.1803.

**(S)-N-Phenyl-2-((2-phenylpropan-2-yl)amino)propanamide (8)**

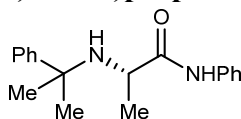

**8**

According to **General Procedure A** with 2-chloro-*N*-phenylpropanamide **E1** (54.9 mg, 0.30 mmol, 1.5 equiv.) and 2-phenylpropan-2-amine **A8** (27.0 mg, 0.20 mmol, 1.0 equiv.) for 72 h, the reaction mixture was purified by flash column chromatography on silica gel (petroleum ether/EtOAc = 5/1) to yield the product **8** as a white solid (50.8 mg, 90% yield, 96% e.e.).

**HPLC** analysis: Chiralcel IA (*n*-hexane/*i*-PrOH = 90/10, flow rate 0.8 mL/min,  $\lambda$  = 254 nm),  $t_R$  (minor) = 8.23 min,  $t_R$  (major) = 9.85 min.

**<sup>1</sup>H NMR** (400 MHz, CDCl<sub>3</sub>)  $\delta$  9.65 (s, 1H), 7.60 – 7.56 (m, 2H), 7.43 – 7.40 (m, 2H), 7.37 – 7.32 (m, 4H), 7.27 – 7.22 (m, 1H), 7.12 – 7.08 (m, 1H), 3.07 (q,  $J$  = 7.1 Hz, 1H), 1.68 (s, 1H), 1.50 (s, 3H), 1.49 (s, 3H), 1.26 (d,  $J$  = 7.1 Hz, 3H).

**<sup>13</sup>C NMR** (100 MHz, CDCl<sub>3</sub>)  $\delta$  174.4, 146.7, 137.8, 129.0, 128.4, 126.9, 125.4, 124.0, 119.2, 56.8, 53.7, 31.2, 26.6, 21.3.

**HRMS** (ESI)  $m/z$  calcd. for C<sub>18</sub>H<sub>23</sub>N<sub>2</sub>O [ $M + H$ ]<sup>+</sup> 283.1805, found 283.1802.

**(S)-2-(((1*H*-Indol-3-yl)methyl)amino)-*N*-phenylpropanamide (9)**

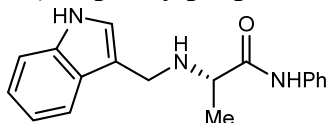

**9**

According to **General procedure A** with 2-chloro-*N*-phenylpropanamide **E1** (54.9 mg, 0.30 mmol, 1.5 equiv.) and (1*H*-indol-3-yl)methanamine **A9** (29.2 mg, 0.20 mmol, 1.0 equiv.) for 72 h, the reaction mixture was purified by preparative thin-layer chromatography on silica gel (EtOAc/CH<sub>3</sub>OH = 50/1) to yield the product **9** as a white solid (40.1 mg, 68% yield, 93% e.e.).

**HPLC** analysis: Chiralcel ADH (*n*-hexane/*i*-PrOH = 90/10, flow rate 1.0 mL/min,  $\lambda$  = 254 nm),  $t_R$  (major) = 19.62 min,  $t_R$  (minor) = 21.86 min.

**<sup>1</sup>H NMR** (400 MHz, CDCl<sub>3</sub>)  $\delta$  9.37 (s, 1H), 8.29 (s, 1H), 7.71 – 7.69 (m, 1H), 7.40 – 7.37 (m, 2H), 7.34 – 7.32 (m, 1H), 7.28 – 7.24 (m, 2H), 7.22 – 7.15 (m, 2H), 7.08 – 7.02 (m, 2H), 4.07 – 3.97 (m, 2H), 3.38 (q,  $J$  = 7.0 Hz, 1H), 1.83 (s, 1H), 1.38 (d,  $J$  = 7.0 Hz, 3H).

**<sup>13</sup>C NMR** (100 MHz, CDCl<sub>3</sub>)  $\delta$  173.5, 137.7, 136.5, 128.8, 126.7, 123.8, 123.0, 122.3, 119.8, 119.3, 118.4, 113.6, 111.6, 58.6, 44.0, 19.8.

**HRMS** (ESI)  $m/z$  calcd. for C<sub>18</sub>H<sub>20</sub>N<sub>3</sub>O [ $M + H$ ]<sup>+</sup> 294.1601, found 294.1604.

**(S)-2-(((1*H*-Indol-5-yl)methyl)amino)-*N*-phenylpropanamide (10)**

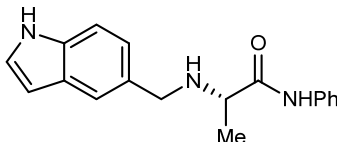

**10**

According to **General procedure A** with 2-chloro-*N*-phenylpropanamide **E1** (54.9 mg, 0.30 mmol, 1.5 equiv.) and (1*H*-indol-5-yl)methanamine **A10** (29.2 mg, 0.20 mmol, 1.0 equiv.) for 72



h, the reaction mixture was purified by preparative thin-layer chromatography on silica gel (EtOAc/CH<sub>3</sub>OH = 50/1) to yield the product **10** as a colorless oil (52.2 mg, 89% yield, 91% e.e.).  
**HPLC** analysis: Chiralcel IC (*n*-hexane/*i*-PrOH = 80/20, flow rate 1.0 mL/min,  $\lambda$  = 254 nm),  $t_R$  (major) = 10.54 min,  $t_R$  (minor) = 13.40 min.

**<sup>1</sup>H NMR** (400 MHz, CDCl<sub>3</sub>)  $\delta$  9.57 (s, 1H), 8.58 (s, 1H), 7.61 – 7.59 (m, 2H), 7.56 (d,  $J$  = 1.6 Hz, 1H), 7.34 – 7.30 (m, 3H), 7.18 – 7.16 (m, 1H), 7.12 – 7.08 (m, 2H), 6.51 – 6.50 (m, 1H), 3.91 – 3.82 (m, 2H), 3.42 (q,  $J$  = 7.0 Hz, 1H), 2.41 (s, 1H), 1.38 (d,  $J$  = 7.0 Hz, 3H).

**<sup>13</sup>C NMR** (100 MHz, CDCl<sub>3</sub>)  $\delta$  173.3, 137.7, 135.2, 130.1, 128.9, 128.0, 124.9, 124.0, 122.3, 120.1, 119.4, 111.4, 102.2, 58.1, 53.2, 19.6.

**HRMS** (ESI)  $m/z$  calcd. for C<sub>18</sub>H<sub>20</sub>N<sub>3</sub>O [M + H]<sup>+</sup> 294.1601, found 294.1602.

**(S)-2-((4-(*N*-(*tert*-Butyl)sulfamoyl)benzyl)amino)-*N*-phenylpropanamide (11)**

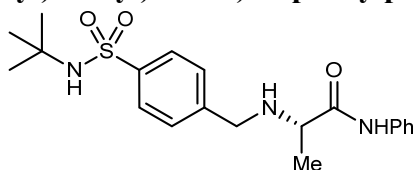

**11**

According to **General procedure A** with 2-chloro-*N*-phenylpropanamide **E1** (54.9 mg, 0.30 mmol, 1.5 equiv.), 4-(aminomethyl)-*N*-(*tert*-butyl)benzenesulfonamide **A11** (48.4 mg, 0.20 mmol, 1.0 equiv.) and Cs<sub>2</sub>CO<sub>3</sub> (260.6 mg, 0.80 mmol, 4.0 equiv.) for 72 h, the reaction mixture was purified by preparative thin-layer chromatography on silica gel (CH<sub>2</sub>Cl<sub>2</sub>/CH<sub>3</sub>OH = 40/1) to yield the product **11** as a colorless oil (53.9 mg, 69% yield, 90% e.e.).

**HPLC** analysis: Chiralcel IC (*n*-hexane/*i*-PrOH = 70/30, flow rate 1.0 mL/min,  $\lambda$  = 254 nm),  $t_R$  (major) = 23.28 min,  $t_R$  (minor) = 51.64 min.

**<sup>1</sup>H NMR** (400 MHz, CDCl<sub>3</sub>)  $\delta$  9.24 (s, 1H), 7.88 – 7.86 (m, 2H), 7.58 – 7.55 (m, 2H), 7.45 – 7.43 (m, 2H), 7.35 – 7.30 (m, 2H), 7.13 – 7.09 (m, 1H), 5.08 (s, 1H), 3.88 (s, 2H), 3.36 (q,  $J$  = 6.9 Hz, 1H), 1.89 (s, 1H), 1.42 (d,  $J$  = 6.9 Hz, 3H), 1.20 (s, 9H).

**<sup>13</sup>C NMR** (100 MHz, CDCl<sub>3</sub>)  $\delta$  172.7, 143.7, 142.4, 137.5, 129.0, 128.2, 127.2, 124.2, 119.3, 58.4, 54.6, 52.0, 30.0, 19.6.

**HRMS** (ESI)  $m/z$  calcd. for C<sub>20</sub>H<sub>28</sub>N<sub>3</sub>O<sub>3</sub>S [M + H]<sup>+</sup> 390.1846, found 390.1849.

**(S)-2-((4-(4-Methylphenylsulfonimidoyl)benzyl)amino)-*N*-phenylpropanamide (12)**

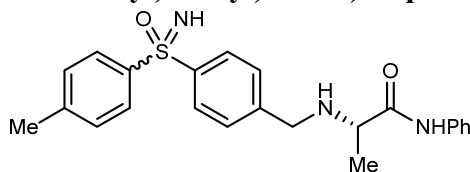

**12**

According to **General procedure A** with 2-chloro-*N*-phenylpropanamide **E1** (54.9 mg, 0.30 mmol, 1.5 equiv.), (4-(aminomethyl)phenyl)(imino)(*p*-tolyl)- $\lambda^6$ -sulfanone **A12** (52.0 mg, 0.20 mmol, 1.0 equiv.), and Cs<sub>2</sub>CO<sub>3</sub> (260.6 mg, 0.80 mmol, 4.0 equiv.) for 72 h, the reaction mixture was purified by preparative thin-layer chromatography on silica gel (CH<sub>2</sub>Cl<sub>2</sub>/CH<sub>3</sub>OH = 25/1) to yield the product **12** as a colorless oil (64.7 mg, 79% yield, 1:1 d.r., 94% e.e., 94% e.e.).

**HPLC** analysis: Chiralcel IC (*n*-hexane/*i*-PrOH = 40/60, flow rate 1.0 mL/min,  $\lambda$  = 254 nm),  $t_R$  (major) = 30.42 min,  $t_R$  (minor) = 78.32 min, 94% e.e.;  $t_R$  (major) = 37.21 min,  $t_R$  (minor) =

49.51 min, 94% e.e.; 1:1 d.r..

**<sup>1</sup>H NMR** (400 MHz, CDCl<sub>3</sub>) δ 9.17 (s, 1H), 7.99 – 7.97 (m, 2H), 7.90 – 7.88 (m, 2H), 7.54 – 7.52 (m, 2H), 7.43 – 7.41 (m, 2H), 7.32 – 7.25 (m, 4H), 7.11 – 7.07 (m, 1H), 3.82 (s, 2H), 3.30 (q, *J* = 6.9 Hz, 1H), 2.88 (s, 1H), 2.37 (s, 3H), 2.02 (s, 1H), 1.38 (d, *J* = 6.9 Hz, 3H).

**<sup>13</sup>C NMR** (100 MHz, CDCl<sub>3</sub>) δ 172.6, 144.1, 143.4, 142.6, 140.1, 137.5, 129.7, 128.9, 128.5, 128.1, 127.8, 124.1, 119.2, 58.3, 51.8, 21.4, 19.5.

**HRMS** (ESI) *m/z* calcd. for C<sub>23</sub>H<sub>26</sub>N<sub>3</sub>O<sub>2</sub>S [M + H]<sup>+</sup> 408.1740, found 408.1743.

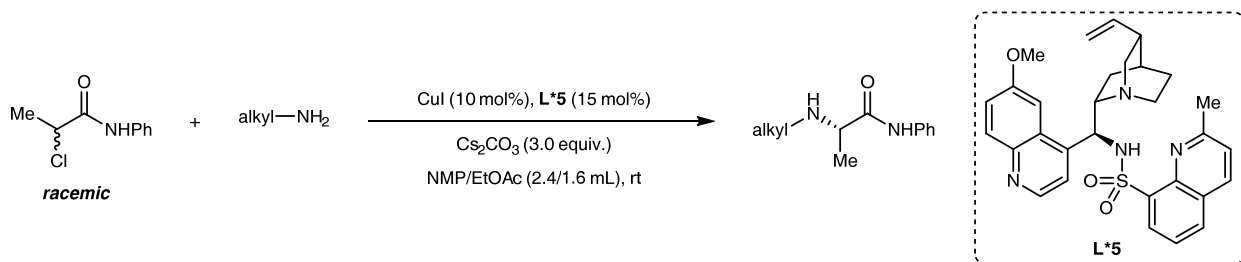

### General procedure B:

Under argon atmosphere, an oven-dried resealable Schlenk tube equipped with a magnetic stir bar was charged with CuI (3.8 mg, 0.02 mmol, 10 mol%), L\*5 (15.8 mg, 0.03 mmol, 15 mol%), Cs<sub>2</sub>CO<sub>3</sub> (195.5 mg, 0.60 mmol, 3.0 equiv.), and anhydrous NMP (2.4 mL). Then, the mixture was stirred at room temperature for 1 h. After that, alkyl chloride (0.30 mmol, 1.5 equiv.), non-benzylic primary amine (0.20 mmol, 1.0 equiv.), and anhydrous EtOAc (1.6 mL) were sequentially added into the mixture and the reaction mixture was stirred at room temperature for 96 h. Upon completion (monitored by TLC), The reaction mixture was diluted with 10 mL EtOAc and washed with brine (10 mL × 4). The organic layer was dried with anhydrous Na<sub>2</sub>SO<sub>4</sub> and filtered through a pad of celite. The organic solvent was evaporated and the residue was purified by flash column chromatography or preparative thin-layer chromatography on silica gel to afford the desired product.

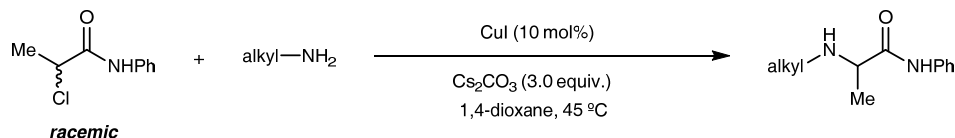

The racemates of products were prepared following the procedure: Under argon atmosphere, an oven-dried resealable Schlenk tube equipped with a magnetic stir bar was charged with CuI (3.8 mg, 0.02 mmol, 10 mol%), Cs<sub>2</sub>CO<sub>3</sub> (195.5 mg, 0.60 mmol, 3.0 equiv.), alkyl chloride (0.30 mmol, 1.5 equiv.), non-benzylic primary amine (0.20 mmol, 1.0 equiv.), and anhydrous 1,4-dioxane (4.0 mL) were sequentially added into the mixture and the reaction mixture was stirred at 45 °C for 72 or 96 h. Upon completion (monitored by TLC), the precipitate was filtered off and washed by EtOAc. The filtrate was evaporated and the residue was purified by flash column chromatography or preparative thin-layer chromatography on silica gel to afford the desired product.

### (S)-N-Phenyl-2-((3-phenylpropyl)amino)propanamide (13)

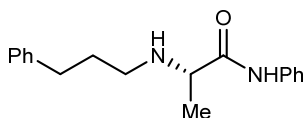

13

According to **General Procedure B** with 2-chloro-*N*-phenylpropanamide **E1** (54.9 mg, 0.30 mmol, 1.5 equiv.) and 3-phenylpropan-1-amine **A13** (27.0 mg, 0.20 mmol, 1.0 equiv.) for 96 h, the reaction mixture was purified by preparative thin-layer chromatography on silica gel (EtOAc/CH<sub>3</sub>OH = 50/1) to yield the product **13** as a colorless oil (47.4 mg, 84% yield, 92% e.e.). **HPLC** analysis: Chiralcel OD3 (*n*-hexane/*i*-PrOH = 90/10, flow rate 0.8 mL/min,  $\lambda$  = 254 nm),  $t_R$  (minor) = 13.04 min,  $t_R$  (major) = 18.26 min.

**<sup>1</sup>H NMR** (400 MHz, CDCl<sub>3</sub>)  $\delta$  9.37 (s, 1H), 7.58 – 7.56 (m, 2H), 7.34 – 7.25 (m, 4H), 7.20 – 7.17 (m, 3H), 7.11 – 7.07 (m, 1H), 3.24 (q,  $J$  = 7.0 Hz, 1H), 2.78 – 2.60 (m, 4H), 1.89 – 1.81 (m, 2H), 1.55 (s, 1H), 1.36 (d,  $J$  = 7.0 Hz, 3H).

**<sup>13</sup>C NMR** (100 MHz, CDCl<sub>3</sub>)  $\delta$  173.2, 141.5, 137.8, 129.0, 128.4, 128.2, 126.0, 124.0, 119.3, 59.0, 48.4, 33.6, 31.8, 19.7.

**HRMS** (ESI)  $m/z$  calcd. for C<sub>18</sub>H<sub>23</sub>N<sub>2</sub>O [M + H]<sup>+</sup> 283.1805, found 283.1804.

**(S)-N-Phenyl-2-((2-(pyridin-2-yl)ethyl)amino)propanamide (14)**

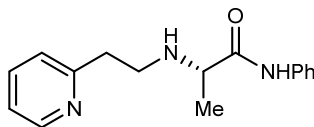

14

According to **General Procedure B** with 2-chloro-*N*-phenylpropanamide **E1** (54.9 mg, 0.30 mmol, 1.5 equiv.) and 2-(pyridin-2-yl)ethan-1-amine **A14** (24.4 mg, 0.20 mmol, 1.0 equiv.) for 96 h, the reaction mixture was purified by preparative thin-layer chromatography on silica gel (EtOAc/CH<sub>3</sub>OH = 10/1) to yield the product **14** as a colorless oil (41.0 mg, 76% yield, 96% e.e.). **HPLC** analysis: Chiralcel IC (*n*-hexane/*i*-PrOH = 80/20, flow rate 1.0 mL/min,  $\lambda$  = 254 nm),  $t_R$  (major) = 15.09 min,  $t_R$  (minor) = 18.84 min.

**<sup>1</sup>H NMR** (400 MHz, CDCl<sub>3</sub>)  $\delta$  9.48 (s, 1H), 8.56 – 8.54 (m, 1H), 7.66 – 7.61 (m, 1H), 7.53 – 7.51 (m, 2H), 7.31 – 7.27 (m, 2H), 7.20 – 7.16 (m, 2H), 7.10 – 7.06 (m, 1H), 3.42 (q,  $J$  = 7.0 Hz, 1H), 3.17 – 3.01 (m, 4H), 2.77 (s, 1H), 1.41 (d,  $J$  = 7.0 Hz, 3H).

**<sup>13</sup>C NMR** (100 MHz, CDCl<sub>3</sub>)  $\delta$  172.7, 159.6, 149.2, 137.8, 136.8, 128.8, 123.9, 123.4, 121.6, 119.5, 58.7, 47.5, 36.3, 19.4.

**HRMS** (ESI)  $m/z$  calcd. for C<sub>16</sub>H<sub>20</sub>N<sub>3</sub>O [M + H]<sup>+</sup> 270.1601, found 270.1598.

**(S)-2-((2-(1*H*-Indol-3-yl)ethyl)amino)-N-phenylpropanamide (15)**

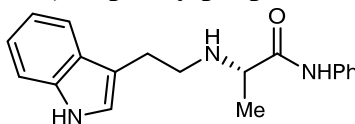

15

According to **General Procedure B** with 2-chloro-*N*-phenylpropanamide **E1** (54.9 mg, 0.30 mmol, 1.5 equiv.) and 2-(1*H*-indol-3-yl)ethan-1-amine **A15** (32.0 mg, 0.20 mmol, 1.0 equiv.) for 96 h, the reaction mixture was purified by preparative thin-layer chromatography on silica gel (EtOAc) to yield the product **15** as a colorless oil (31.4 mg, 51% yield, 95% e.e.).

**HPLC** analysis: Chiralcel IC (*n*-hexane/*i*-PrOH = 80/20, flow rate 1.0 mL/min,  $\lambda$  = 254 nm),  $t_R$  (major) = 8.96 min,  $t_R$  (minor) = 10.96 min.

**$^1\text{H}$  NMR** (400 MHz,  $\text{CDCl}_3$ )  $\delta$  9.26 (s, 1H), 8.09 (s, 1H), 7.64 – 7.61 (m, 1H), 7.40 – 7.38 (m, 1H), 7.32 – 7.29 (m, 2H), 7.27 – 7.19 (m, 3H), 7.14 – 7.10 (m, 1H), 7.07 – 7.03 (m, 2H), 3.29 (q,  $J$  = 7.0 Hz, 1H), 3.10 – 3.05 (m, 1H), 3.01 – 2.90 (m, 3H), 1.68 (s, 1H), 1.33 (d,  $J$  = 7.0 Hz, 3H).

**$^{13}\text{C}$  NMR** (100 MHz,  $\text{CDCl}_3$ )  $\delta$  173.2, 137.8, 136.4, 128.8, 127.4, 123.8, 122.2, 122.0, 119.6, 119.3, 118.8, 113.6, 111.3, 58.7, 48.8, 25.9, 19.7.

**HRMS** (ESI)  $m/z$  calcd. For  $\text{C}_{19}\text{H}_{22}\text{N}_3\text{O}$   $[\text{M} + \text{H}]^+$  308.1757, found 308.1754.

### (*S*)-2-((2-Morpholinoethyl)amino)-*N*-phenylpropanamide (**16**)

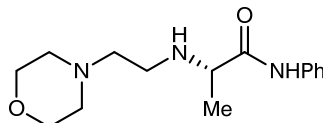

**16**

According to **General Procedure B** with 2-chloro-*N*-phenylpropanamide **E1** (54.9 mg, 0.30 mmol, 1.5 equiv.) and 2-morpholinoethan-1-amine **A16** (26.0 mg, 0.20 mmol, 1.0 equiv.) for 96 h, the reaction mixture was purified by preparative thin-layer chromatography on silica gel (EtOAc/ $\text{CH}_3\text{OH}$  = 20/1) to yield the product **16** as a colorless oil (28.3 mg, 51% yield, 89% e.e.).

**HPLC** analysis: Chiralcel IG (*n*-hexane/*i*-PrOH = 75/25, flow rate 1.0 mL/min,  $\lambda$  = 254 nm),  $t_R$  (major) = 8.49 min,  $t_R$  (minor) = 9.29 min.

**$^1\text{H}$  NMR** (400 MHz,  $\text{CDCl}_3$ )  $\delta$  9.43 (s, 1H), 7.61 – 7.59 (m, 2H), 7.35 – 7.31 (m, 2H), 7.12 – 7.08 (m, 1H), 3.75 – 3.67 (m, 4H), 3.28 (q,  $J$  = 7.0 Hz, 1H), 2.84 – 2.68 (m, 2H), 2.57 – 2.40 (m, 6H), 1.87 (s, 1H), 1.41 (d,  $J$  = 7.0 Hz, 3H).

**$^{13}\text{C}$  NMR** (100 MHz,  $\text{CDCl}_3$ )  $\delta$  173.2, 137.9, 129.0, 124.0, 119.4, 66.9, 59.1, 58.1, 53.6, 44.9, 19.7.

**HRMS** (ESI)  $m/z$  calcd. For  $\text{C}_{15}\text{H}_{24}\text{N}_3\text{O}_2$   $[\text{M} + \text{H}]^+$  278.1863, found 278.1861.

### (*S*)-2-((2-(Methylthio)ethyl)amino)-*N*-phenylpropanamide (**17**)

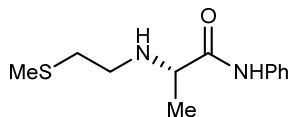

**17**

According to **General Procedure B** with 2-chloro-*N*-phenylpropanamide **E1** (54.9 mg, 0.30 mmol, 1.5 equiv.) and 2-(methylthio)ethan-1-amine **A17** (18.2 mg, 0.20 mmol, 1.0 equiv.) for 96 h, the reaction mixture was purified by preparative thin-layer chromatography on silica gel (EtOAc/ $\text{CH}_3\text{OH}$  = 50/1) to yield the product **17** as a colorless oil (30.0 mg, 63% yield, 93% e.e.).

**HPLC** analysis: Chiralcel IC (*n*-hexane/*i*-PrOH = 90/10, flow rate 1.0 mL/min,  $\lambda$  = 254 nm),  $t_R$  (major) = 14.53 min,  $t_R$  (minor) = 20.69 min.

**$^1\text{H}$  NMR** (400 MHz,  $\text{CDCl}_3$ )  $\delta$  9.55 (s, 1H), 7.66 – 7.63 (m, 2H), 7.35 – 7.30 (m, 2H), 7.12 – 7.07 (m, 1H), 3.30 (q,  $J$  = 7.0 Hz, 1H), 3.00 – 2.94 (m, 1H), 2.81 – 2.75 (m, 1H), 2.72 – 2.62 (m, 2H), 2.10 (s, 3H), 1.73 (s, 1H), 1.42 (d,  $J$  = 7.0 Hz, 3H).

**$^{13}\text{C}$  NMR** (100 MHz,  $\text{CDCl}_3$ )  $\delta$  173.0, 137.9, 128.9, 123.9, 119.2, 58.6, 46.4, 34.9, 19.8, 15.4.

**HRMS** (ESI)  $m/z$  calcd. for  $\text{C}_{12}\text{H}_{19}\text{N}_2\text{OS}$   $[\text{M} + \text{H}]^+$  239.1213, found 239.1208.

### (*S*)-2-((2-Methylallyl)amino)-*N*-phenylpropanamide (**18**)

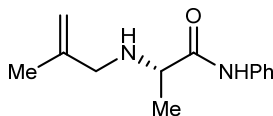

18

According to **General Procedure B** with 2-chloro-*N*-phenylpropanamide **E1** (54.9 mg, 0.30 mmol, 1.5 equiv.) and 2-methylprop-2-en-1-amine **A18** (14.2 mg, 0.20 mmol, 1.0 equiv.) for 96 h, the reaction mixture was purified by preparative thin-layer chromatography on silica gel (petroleum ether/EtOAc = 1/2) to yield the product **18** as a colorless oil (33.7 mg, 77% yield, 93% e.e.).

**HPLC** analysis: Chiralcel IC (*n*-hexane/*i*-PrOH = 85/15, flow rate 1.0 mL/min,  $\lambda$  = 254 nm),  $t_R$  (major) = 7.81 min,  $t_R$  (minor) = 9.22 min.

**$^1\text{H}$  NMR** (400 MHz,  $\text{CDCl}_3$ )  $\delta$  9.40 (s, 1H), 7.60 – 7.56 (m, 2H), 7.35 – 7.30 (m, 2H), 7.11 – 7.07 (m, 1H), 4.96 – 4.95 (m, 1H), 4.90 – 4.89 (m, 1H), 3.30 (q,  $J$  = 7.0 Hz, 1H), 3.26 – 3.12 (m, 2H), 1.79 (s, 3H), 1.66 (s, 1H), 1.41 (d,  $J$  = 7.0 Hz, 3H).

**$^{13}\text{C}$  NMR** (100 MHz,  $\text{CDCl}_3$ )  $\delta$  173.1, 143.0, 137.8, 128.9, 123.9, 119.2, 111.4, 58.2, 54.4, 20.8, 19.6.

**HRMS** (ESI)  $m/z$  calcd. for  $\text{C}_{13}\text{H}_{19}\text{N}_2\text{O}$  [ $\text{M} + \text{H}$ ] $^+$  219.1492, found 219.1491.

***tert*-Butyl (S)-(1-oxo-1-(phenylamino)propan-2-yl)glycinate (19)**

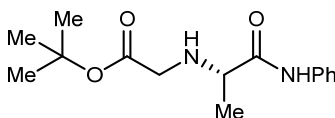

19

According to **General Procedure B** with 2-chloro-*N*-phenylpropanamide **E1** (54.9 mg, 0.30 mmol, 1.5 equiv.) and *tert*-butyl glycinate **A19** (26.2mg, 0.20 mmol, 1.0 equiv.) for 96 h, the reaction mixture was purified by flash column chromatography on silica gel (petroleum ether/EtOAc = 1/1) to yield the product **19** as a colorless oil (30.6 mg, 55% yield, 95% e.e.).

**HPLC** analysis: Chiralcel IC (*n*-hexane/*i*-PrOH = 80/20, flow rate 1.0 mL/min,  $\lambda$  = 254 nm),  $t_R$  (major) = 7.97 min,  $t_R$  (minor) = 10.55 min.

**$^1\text{H}$  NMR** (400 MHz,  $\text{CDCl}_3$ )  $\delta$  9.33 (s, 1H), 7.63 – 7.60 (m, 2H), 7.35 – 7.31 (m, 2H), 7.12 – 7.08 (m, 1H), 3.42 – 3.25 (m, 3H), 1.88 (s, 1H), 1.47 (s, 9H), 1.44 (d,  $J$  = 6.9 Hz, 3H).

**$^{13}\text{C}$  NMR** (100 MHz,  $\text{CDCl}_3$ )  $\delta$  172.8, 171.3, 137.8, 128.9, 124.0, 119.4, 81.9, 59.2, 50.4, 28.1, 19.8.

**HRMS** (ESI)  $m/z$  calcd. for  $\text{C}_{15}\text{H}_{23}\text{N}_2\text{O}_3$  [ $\text{M} + \text{H}$ ] $^+$  279.1703, found 279.1700.

***tert*-Butyl (S)-(2-((1-oxo-1-(phenylamino)propan-2-yl)amino)ethyl)carbamate (20)**

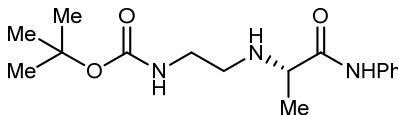

20

According to **General Procedure B** with 2-chloro-*N*-phenylpropanamide **E1** (54.9 mg, 0.30 mmol, 1.5 equiv.) and *tert*-butyl (2-aminoethyl)carbamate **A20** (32.0 mg, 0.20 mmol, 1.0 equiv.) for 96 h, the reaction mixture was purified by preparative thin-layer chromatography on silica gel (EtOAc/ $\text{CH}_3\text{OH}$  = 50/1) to yield the product **20** as a colorless oil (46.1 mg, 75% yield, 90% e.e.).

**HPLC** analysis: Chiralcel IC (*n*-hexane/*i*-PrOH = 80/20, flow rate 1.0 mL/min,  $\lambda$  = 254 nm),  $t_R$  (major) = 8.49 min,  $t_R$  (minor) = 9.55 min.

**$^1\text{H}$  NMR** (400 MHz,  $\text{CDCl}_3$ )  $\delta$  9.41 (s, 1H), 7.63 – 7.60 (m, 2H), 7.33 – 7.29 (m, 2H), 7.11 – 7.07 (m, 1H), 4.98 (s, 1H), 3.37 (q,  $J$  = 7.0 Hz, 1H), 3.30 – 3.26 (m, 2H), 2.89 – 2.83 (m, 1H), 2.73 – 2.67 (m, 1H), 2.59 (s, 1H), 1.45 (s, 9H), 1.41 (d,  $J$  = 6.9 Hz, 3H).

**$^{13}\text{C}$  NMR** (100 MHz,  $\text{CDCl}_3$ )  $\delta$  172.5, 156.3, 137.7, 128.9, 124.0, 119.4, 79.6, 58.6, 48.6, 40.3, 28.3, 19.4.

**HRMS** (ESI)  $m/z$  calcd. For  $\text{C}_{16}\text{H}_{26}\text{N}_3\text{O}_3$   $[\text{M} + \text{H}]^+$  308.1969, found 308.1964.

### (*S*)-2-((6-Hydroxyhexyl)amino)-*N*-phenylpropanamide (**21**)

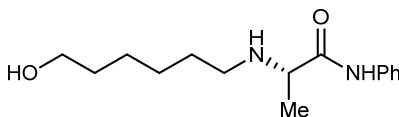

**21**

According to **General Procedure B** with 2-chloro-*N*-phenylpropanamide **E1** (54.9 mg, 0.30 mmol, 1.5 equiv.) and 6-aminohexan-1-ol **A21** (23.4 mg, 0.20 mmol, 1.0 equiv.) for 96 h, the reaction mixture was purified by preparative thin-layer chromatography on silica gel (EtOAc/ $\text{CH}_3\text{OH}$  = 10/1) to yield the product **21** as a colorless oil (34.4 mg, 65% yield, 92% e.e.).

**HPLC** analysis: Chiralcel IC (*n*-hexane/*i*-PrOH = 80/20, flow rate 1.0 mL/min,  $\lambda$  = 254 nm),  $t_R$  (major) = 15.57 min,  $t_R$  (minor) = 20.59 min.

**$^1\text{H}$  NMR** (400 MHz,  $\text{CDCl}_3$ )  $\delta$  9.41 (s, 1H), 7.60 – 7.57 (m, 2H), 7.35 – 7.30 (m, 2H), 7.11 – 7.07 (m, 1H), 3.62 (t,  $J$  = 6.5 Hz, 2H), 3.25 (q,  $J$  = 7.0 Hz, 1H), 2.73 – 2.67 (m, 1H), 2.61 – 2.54 (m, 1H), 1.72 (s, 2H), 1.62 – 1.49 (m, 4H), 1.44 – 1.35 (m, 7H).

**$^{13}\text{C}$  NMR** (100 MHz,  $\text{CDCl}_3$ )  $\delta$  173.4, 137.8, 128.9, 123.9, 119.2, 62.6, 59.0, 48.7, 32.6, 30.1, 27.0, 25.6, 19.7.

**HRMS** (ESI)  $m/z$  calcd. For  $\text{C}_{15}\text{H}_{25}\text{N}_2\text{O}_2$   $[\text{M} + \text{H}]^+$  265.1911, found 265.1907.

### (*S*)-2-(Oxetan-3-ylamino)-*N*-phenylpropanamide (**22**)

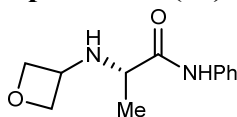

**22**

According to **General Procedure B** with 2-chloro-*N*-phenylpropanamide **E1** (54.9 mg, 0.30 mmol, 1.5 equiv.) and oxetan-3-amine **A22** (14.6 mg, 0.20 mmol, 1.0 equiv.) for 96 h, the reaction mixture was purified by preparative thin-layer chromatography on silica gel (EtOAc/ $\text{CH}_3\text{OH}$  = 50/1) to yield the product **22** as a colorless oil (22.9 mg, 52% yield, 89% e.e.).

**HPLC** analysis: Chiralcel IC (*n*-hexane/*i*-PrOH = 80/20, flow rate 1.0 mL/min,  $\lambda$  = 254 nm),  $t_R$  (major) = 19.53 min,  $t_R$  (minor) = 27.31 min.

**$^1\text{H}$  NMR** (400 MHz,  $\text{CDCl}_3$ )  $\delta$  9.05 (s, 1H), 7.58 – 7.55 (m, 2H), 7.35 – 7.30 (m, 2H), 7.13 – 7.09 (m, 1H), 4.85 (q,  $J$  = 6.8 Hz, 2H), 4.50 – 4.43 (m, 2H), 4.02 – 3.96 (m, 1H), 3.25 (q,  $J$  = 7.0 Hz, 1H), 1.88 (s, 1H), 1.41 (d,  $J$  = 7.0 Hz, 3H).

**$^{13}\text{C}$  NMR** (100 MHz,  $\text{CDCl}_3$ )  $\delta$  172.3, 137.5, 129.0, 124.3, 119.4, 80.0, 78.6, 56.7, 52.5, 19.9.

**HRMS** (ESI)  $m/z$  calcd. For  $\text{C}_{12}\text{H}_{17}\text{N}_2\text{O}_2$   $[\text{M} + \text{H}]^+$  221.1285, found 221.1282.

**(S)-2-((1,1-Dioxidotetrahydro-2H-thiopyran-4-yl)amino)-N-phenylpropanamide (23)**

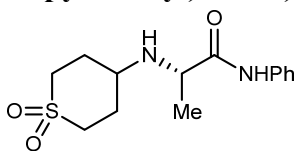

**23**

According to **General Procedure B** with 2-chloro-*N*-phenylpropanamide **E1** (54.9 mg, 0.30 mmol, 1.5 equiv.), 4-Aminotetrahydro-2*H*-thiopyran 1,1-dioxide hydrochloride **A23** (37.0 mg, 0.20 mmol, 1.0 equiv.), and Cs<sub>2</sub>CO<sub>3</sub> (260.6 mg, 0.80 mmol, 4.0 equiv.) for 96 h, the reaction mixture was purified by preparative thin-layer chromatography (EtOAc) on silica gel to yield the product **23** as a yellowish oil (32.0 mg, 54% yield, 93% e.e.).

**HPLC** analysis: Chiralcel IF (*n*-hexane/*i*-PrOH = 85/15, flow rate 1.0 mL/min,  $\lambda$  = 254 nm),  $t_R$  (major) = 22.59 min,  $t_R$  (minor) = 31.08 min.

**<sup>1</sup>H NMR** (400 MHz, CDCl<sub>3</sub>)  $\delta$  8.99 (s, 1H), 7.57 – 7.55 (m, 2H), 7.36 – 7.32 (m, 2H), 7.15 – 7.11 (m, 1H), 3.33 (q,  $J$  = 7.0 Hz, 1H), 3.18 – 3.07 (m, 2H), 3.02 – 2.93 (m, 2H), 2.86 – 2.80 (m, 1H), 2.32 – 2.19 (m, 2H), 2.11 – 2.01 (m, 2H), 1.69 (s, 1H) 1.42 (d,  $J$  = 6.9 Hz, 3H).

**<sup>13</sup>C NMR** (100 MHz, CDCl<sub>3</sub>)  $\delta$  172.8, 137.3, 129.1, 124.4, 119.4, 57.0, 52.7, 49.0, 48.9, 30.4, 30.0, 20.3.

**HRMS** (ESI)  $m/z$  calcd. for C<sub>14</sub>H<sub>21</sub>N<sub>2</sub>O<sub>3</sub>S [M + H]<sup>+</sup> 297.1267, found 297.1263.

**(S)-2-(Bicyclo[1.1.1]pentan-1-ylamino)-N-phenylpropanamide (24)**

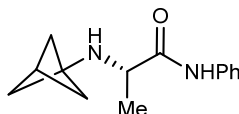

**24**

According to **General Procedure B** with 2-chloro-*N*-phenylpropanamide **E1** (54.9 mg, 0.30 mmol, 1.5 equiv.), bicyclo[1.1.1]pentan-1-amine hydrochloride **A24** (23.8 mg, 0.20 mmol, 1.0 equiv.), **L\*4** (15.4 mg, 0.03 mmol, 15 mol%), and Cs<sub>2</sub>CO<sub>3</sub> (260.6 mg, 0.80 mmol, 4.0 equiv.) for 96 h, the reaction mixture was purified by flash column chromatography on silica gel (petroleum ether/EtOAc = 2/1) to yield the product **24** as a colorless oil (39.0 mg, 85% yield, 92% e.e.).

**HPLC** analysis: Chiralcel IC (*n*-hexane/*i*-PrOH = 90/10, flow rate 1.0 mL/min,  $\lambda$  = 254 nm),  $t_R$  (major) = 9.05 min,  $t_R$  (minor) = 11.15 min.

**<sup>1</sup>H NMR** (400 MHz, CDCl<sub>3</sub>)  $\delta$  9.22 (s, 1H), 7.59 – 7.56 (m, 2H), 7.35 – 7.30 (m, 2H), 7.12 – 7.07 (m, 1H), 3.38 (q,  $J$  = 7.0 Hz, 1H), 2.38 (s, 1H), 1.87 – 1.83 (m, 4H), 1.77 – 1.74 (m, 3H), 1.37 (d,  $J$  = 7.1 Hz, 3H).

**<sup>13</sup>C NMR** (100 MHz, CDCl<sub>3</sub>)  $\delta$  173.3, 137.7, 128.9, 124.0, 119.3, 55.3, 55.2, 51.0, 22.6, 20.0.

**HRMS** (ESI)  $m/z$  calcd. for C<sub>14</sub>H<sub>19</sub>N<sub>2</sub>O [M + H]<sup>+</sup> 231.1492, found 231.1494.

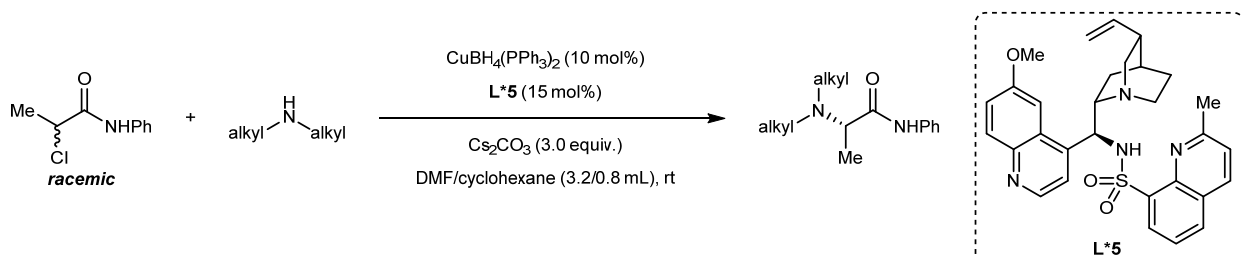

### General procedure C:

Under argon atmosphere, an oven-dried resealable Schlenk tube equipped with a magnetic stir bar was charged with  $\text{CuBH}_4(\text{PPh}_3)_2$  (12.0 mg, 0.02 mmol, 10 mol%), **L\*5** (15.8 mg, 0.03 mmol, 15 mol%),  $\text{Cs}_2\text{CO}_3$  (195.5 mg, 0.60 mmol, 3.0 equiv.), and anhydrous DMF (3.2 mL). Then, the mixture was stirred at room temperature for 1 h. After that, alkyl chloride (0.30 mmol, 1.5 equiv.), secondary alkyl amine (0.20 mmol, 1.0 equiv.), and anhydrous cyclohexane (0.8 mL) were sequentially added into the mixture and the reaction mixture was stirred at room temperature for 96 h. Upon completion (monitored by TLC), The reaction mixture was diluted with 10 mL EtOAc and washed with brine (10 mL  $\times$  3). The organic layer was dried with anhydrous  $\text{Na}_2\text{SO}_4$  and filtered through a pad of celite. The organic solvent was evaporated and the residue was purified by flash column chromatography or preparative thin-layer chromatography on silica gel to afford the desired product.

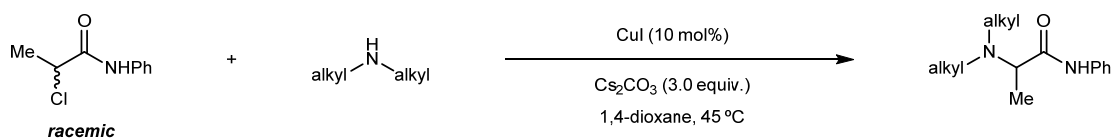

The racemates of products were prepared following the procedure: Under argon atmosphere, an oven-dried resealable Schlenk tube equipped with a magnetic stir bar was charged with CuI (3.8 mg, 0.02 mmol, 10 mol%),  $\text{Cs}_2\text{CO}_3$  (195.5 mg, 0.60 mmol, 3.0 equiv.), alkyl chloride (0.30 mmol, 1.5 equiv.), secondary alkyl amine (0.20 mmol, 1.0 equiv.), and anhydrous 1,4-dioxane (4.0 mL) were sequentially added into the mixture and the reaction mixture was stirred at 45 °C for 72 or 96 h. Upon completion (monitored by TLC), the precipitate was filtered off and washed by EtOAc. The filtrate was evaporated and the residue was purified by flash column chromatography or preparative thin-layer chromatography on silica gel to afford the desired product.

### (S)-2-(Butyl(methyl)amino)-N-phenylpropanamide (**25**)

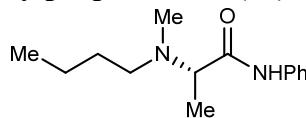

**25**

According to **General Procedure C** with 2-chloro-*N*-phenylpropanamide **E1** (54.9 mg, 0.30 mmol, 1.5 equiv.) and *N*-methylbutan-1-amine **A25** (17.4 mg, 0.20 mmol, 1.0 equiv.) for 96 h, the reaction mixture was purified by flash column chromatography on silica gel (petroleum ether/EtOAc = 2/1) to yield the product **25** as a colorless oil (36.1 mg, 77% yield, 90% e.e.).

**HPLC** analysis: Chiralcel IC (*n*-hexane/*i*-PrOH = 80/20, flow rate 0.8 mL/min,  $\lambda$  = 254 nm),  $t_R$  (major) = 9.39 min,  $t_R$  (minor) = 11.09 min.

**$^1\text{H}$  NMR** (400 MHz,  $\text{CDCl}_3$ )  $\delta$  9.42 (s, 1H), 7.58 – 7.56 (m, 2H), 7.34 – 7.30 (m, 2H), 7.10 – 7.06 (m, 1H), 3.32 (q,  $J$  = 7.0 Hz, 1H), 2.45 (t,  $J$  = 7.2 Hz, 2H), 2.28 (s, 3H), 1.55 – 1.47 (m, 2H), 1.42 – 1.33 (m, 2H), 1.27 (d,  $J$  = 7.0 Hz, 3H), 0.94 (t,  $J$  = 7.3 Hz, 3H).

**$^{13}\text{C}$  NMR** (100 MHz,  $\text{CDCl}_3$ )  $\delta$  172.4, 138.0, 128.9, 123.7, 119.1, 63.6, 54.2, 38.0, 30.0, 20.4, 14.0, 9.2.

**HRMS** (ESI)  $m/z$  calcd. for  $\text{C}_{14}\text{H}_{23}\text{N}_2\text{O}$  [ $\text{M} + \text{H}$ ] $^+$  235.1805, found 235.1809.



**(S)-2-((Furan-2-ylmethyl)(methyl)amino)-N-phenylpropanamide (26)**

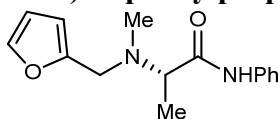

**26**

According to **General Procedure C** with 2-chloro-*N*-phenylpropanamide **E1** (54.9 mg, 0.30 mmol, 1.5 equiv.) and 1-(furan-2-yl)-*N*-methylmethanamine **A26** (22.2 mg, 0.20 mmol, 1.0 equiv.) for 96 h, the reaction mixture was purified by flash column chromatography on silica gel (petroleum ether/EtOAc = 5/1) to yield the product **26** as a colorless oil (24.8 mg, 48% yield, 91% e.e.).

**HPLC** analysis: Chiralcel IH (*n*-hexane/*i*-PrOH = 90/10, flow rate 0.8 mL/min,  $\lambda$  = 254 nm),  $t_R$  (major) = 8.93 min,  $t_R$  (minor) = 10.35 min.

**$^1\text{H}$  NMR** (400 MHz,  $\text{CDCl}_3$ )  $\delta$  9.51 (s, 1H), 7.65 – 7.61 (m, 2H), 7.423 – 7.416 (m, 1H), 7.36 – 7.30 (m, 2H), 7.11 – 7.07 (m, 1H), 6.34– 6.33 (m, 1H), 6.24 – 6.23 (m, 1H), 3.59 (q,  $J$  = 14.3 Hz, 2H), 3.38 (q,  $J$  = 7.0 Hz, 1H), 2.33 (s, 3H), 1.33 (d,  $J$  = 7.0 Hz, 3H).

**$^{13}\text{C}$  NMR** (100 MHz,  $\text{CDCl}_3$ )  $\delta$  172.0, 151.8, 142.4, 138.1, 128.9, 123.8, 119.2, 110.2, 108.7, 62.8, 50.8, 38.5, 9.8.

**HRMS** (ESI)  $m/z$  calcd. for  $\text{C}_{15}\text{H}_{19}\text{N}_2\text{O}_2$  [ $\text{M} + \text{H}$ ] $^+$  259.1441, found 259.1445.

**(S)-2-(Methyl(2-(pyridin-2-yl)ethyl)amino)-N-phenylpropanamide (27)**

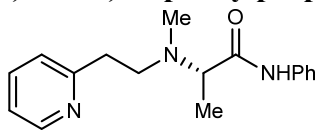

**27**

According to **General Procedure C** with 2-chloro-*N*-phenylpropanamide **E1** (54.9 mg, 0.30 mmol, 1.5 equiv.), *N*-methyl-2-(pyridin-2-yl)ethan-1-amine dihydrochloride **A27** (41.6 mg, 0.20 mmol, 1.0 equiv.), and  $\text{Cs}_2\text{CO}_3$  (325.6 mg, 1.0 mmol, 5.0 equiv.) for 96 h, the reaction mixture was purified by preparative thin-layer chromatography on silica gel (petroleum ether/EtOAc = 1/2) to yield the product **27** as a colorless oil (38.8 mg, 69% yield, 94% e.e.).

**HPLC** analysis: Chiralcel IH (*n*-hexane/*i*-PrOH = 95/5, flow rate 0.8 mL/min,  $\lambda$  = 254 nm),  $t_R$  (major) = 19.90 min,  $t_R$  (minor) = 22.43 min.

**$^1\text{H}$  NMR** (400 MHz,  $\text{CDCl}_3$ )  $\delta$  9.16 (s, 1H), 8.54 – 8.52 (m, 1H), 7.63 – 7.58 (m, 1H), 7.42 – 7.40 (m, 2H), 7.31 – 7.26 (m, 2H), 7.20 – 7.17 (m, 1H), 7.15 – 7.12 (m, 1H), 7.08 – 7.04 (m, 1H), 3.40 (q,  $J$  = 7.0 Hz, 1H), 3.04 – 2.94 (m, 4H), 2.31 (s, 3H), 1.28 (d,  $J$  = 7.0 Hz, 3H).

**$^{13}\text{C}$  NMR** (100 MHz,  $\text{CDCl}_3$ )  $\delta$  172.0, 160.0, 149.4, 138.0, 136.5, 128.8, 123.7, 123.2, 121.4, 119.3, 63.2, 54.4, 37.6, 36.5, 9.0.

**HRMS** (ESI)  $m/z$  calcd. for  $\text{C}_{17}\text{H}_{22}\text{N}_3\text{O}$  [ $\text{M} + \text{H}$ ] $^+$  284.1757, found 284.1761.

**(S)-2-(Allyl(methyl)amino)-N-phenylpropanamide (28)**

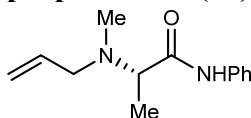

**28**

According to **General Procedure C** with 2-chloro-*N*-phenylpropanamide **E1** (54.9 mg, 0.30

mmol, 1.5 equiv.) and *N*-methylprop-2-en-1-amine **A28** (14.2 mg, 0.20 mmol, 1.0 equiv.) for 96 h, the reaction mixture was purified by flash column chromatography on silica gel (petroleum ether/EtOAc = 10/1) to yield the product **28** as a colorless oil (25.6 mg, 59% yield, 92% e.e.).

**HPLC** analysis: Chiralcel IH (*n*-hexane/*i*-PrOH = 95/5, flow rate 0.8 mL/min,  $\lambda$  = 254 nm),  $t_R$  (major) = 8.11 min,  $t_R$  (minor) = 9.70 min.

**$^1\text{H}$  NMR** (400 MHz,  $\text{CDCl}_3$ )  $\delta$  9.34 (s, 1H), 7.58 – 7.55 (m, 2H), 7.34 – 7.30 (m, 2H), 7.11 – 7.06 (m, 1H), 5.92 – 5.82 (m, 1H), 5.29 – 5.19 (m, 2H), 3.38 (q,  $J$  = 7.0 Hz, 1H), 3.16 – 3.04 (m, 2H), 2.30 (s, 3H), 1.29 (d,  $J$  = 7.0 Hz, 3H).

**$^{13}\text{C}$  NMR** (100 MHz,  $\text{CDCl}_3$ )  $\delta$  172.1, 138.0, 135.1, 129.0, 123.8, 119.2, 117.9, 62.8, 57.4, 38.2, 9.5.

**HRMS** (ESI)  $m/z$  calcd. for  $\text{C}_{13}\text{H}_{19}\text{N}_2\text{O}$  [ $\text{M} + \text{H}$ ] $^+$  219.1492, found 219.1496.

***tert*-Butyl (S)-(2-(methyl(1-oxo-1-(phenylamino)propan-2-yl)amino)ethyl)carbamate (29)**

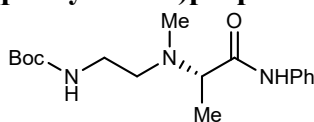

**29**

According to **General Procedure C** with 2-chloro-*N*-phenylpropanamide **E1** (54.9 mg, 0.30 mmol, 1.5 equiv.) and *tert*-butyl (2-(methylamino)ethyl)carbamate **A29** (34.8 mg, 0.20 mmol, 1.0 equiv.) for 96 h, the reaction mixture was purified by preparative thin-layer chromatography on silica gel (petroleum ether/EtOAc = 1/2) to yield the product **29** as a colorless oil (42.4 mg, 66% yield, 92% e.e.).

**HPLC** analysis: Chiralcel IA (*n*-hexane/*i*-PrOH = 95/5, flow rate 1.0 mL/min,  $\lambda$  = 254 nm),  $t_R$  (minor) = 14.11 min,  $t_R$  (major) = 17.36 min.

**$^1\text{H}$  NMR** (400 MHz,  $\text{CDCl}_3$ )  $\delta$  9.29 (s, 1H), 7.64 – 7.61 (m, 2H), 7.34 – 7.29 (m, 2H), 7.11 – 7.06 (m, 1H), 4.75 (s, 1H), 3.39 – 3.29 (m, 3H), 2.56 (t,  $J$  = 6.1 Hz, 2H), 2.35 (s, 3H), 1.43 (s, 9H), 1.29 (d,  $J$  = 7.0 Hz, 3H).

**$^{13}\text{C}$  NMR** (100 MHz,  $\text{CDCl}_3$ )  $\delta$  171.7, 156.0, 138.0, 128.9, 123.9, 119.3, 79.6, 64.0, 54.1, 38.5, 38.2, 28.3, 9.3.

**HRMS** (ESI)  $m/z$  calcd. for  $\text{C}_{17}\text{H}_{28}\text{N}_3\text{O}_3$  [ $\text{M} + \text{H}$ ] $^+$  322.2125, found 322.2130.

**(S)-2-((2-Hydroxyethyl)(methyl)amino)-*N*-phenylpropanamide (30)**

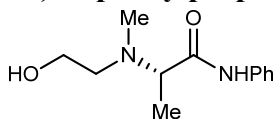

**30**

According to **General Procedure C** with 2-chloro-*N*-phenylpropanamide **E1** (54.9 mg, 0.30 mmol, 1.5 equiv.) and 2-(methylamino)ethan-1-ol **A30** (15.0 mg, 0.20 mmol, 1.0 equiv.) for 96 h, the reaction mixture was purified by preparative thin-layer chromatography on silica gel (EtOAc) to yield the product **30** as a colorless oil (36.0 mg, 81% yield, 90% e.e.).

**HPLC** analysis: Chiralcel IC (*n*-hexane/*i*-PrOH = 80/20, flow rate 1.0 mL/min,  $\lambda$  = 254 nm),  $t_R$  (major) = 11.88 min,  $t_R$  (minor) = 12.89 min.

**$^1\text{H}$  NMR** (400 MHz,  $\text{CDCl}_3$ )  $\delta$  9.65 (s, 1H), 7.63 – 7.60 (m, 2H), 7.32 – 7.28 (m, 2H), 7.09 – 7.05 (m, 1H), 3.82 – 3.72 (m, 2H), 3.49 (q,  $J$  = 7.0 Hz, 1H), 2.75 – 2.69 (m, 1H), 2.64 – 2.58 (m, 2H), 2.44 (s, 3H), 1.34 (d,  $J$  = 7.0 Hz, 3H).

$^{13}\text{C}$  NMR (100 MHz,  $\text{CDCl}_3$ )  $\delta$  171.5, 138.0, 128.8, 123.9, 119.5, 63.9, 59.1, 55.7, 38.5, 10.1.  
HRMS (ESI)  $m/z$  calcd. for  $\text{C}_{12}\text{H}_{19}\text{N}_2\text{O}_2$   $[\text{M} + \text{H}]^+$  223.1441, found 223.1442.

**(S)-2-((R)-3-Hydroxypyrrolidin-1-yl)-N-phenylpropanamide (31)**

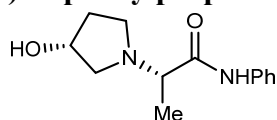

**31**

According to **General Procedure C** with 2-chloro-*N*-phenylpropanamide **E1** (54.9 mg, 0.30 mmol, 1.5 equiv.) and (*R*)-pyrrolidin-3-ol **A31** (17.4 mg, 0.20 mmol, 1.0 equiv.) for 96 h, the reaction mixture was purified by preparative thin-layer chromatography on silica gel ( $\text{EtOAc}/\text{CH}_3\text{OH} = 30/1$ ) to yield the product **31** as a colorless oil (25.3 mg, 54% yield, >20:1 d.r.). The diastereomeric ratio was determined by crude  $^1\text{H}$  NMR spectroscopy.

$^1\text{H}$  NMR (400 MHz,  $\text{CDCl}_3$ )  $\delta$  9.19 (s, 1H), 7.60 – 7.56 (m, 2H), 7.34 – 7.29 (m, 2H), 7.12 – 7.08 (m, 1H), 4.47 – 4.43 (m, 1H), 3.27 (q,  $J = 6.9$  Hz, 1H), 3.12 – 3.06 (m, 1H), 2.89 – 2.78 (m, 3H), 2.65 – 2.59 (m, 1H), 2.24 – 2.15 (m, 1H), 1.90 – 1.82 (m, 1H), 1.41 (d,  $J = 6.9$  Hz, 3H).

$^{13}\text{C}$  NMR (100 MHz,  $\text{CDCl}_3$ )  $\delta$  171.9, 137.8, 128.9, 124.2, 119.7, 70.6, 63.7, 59.3, 50.3, 34.4, 16.0.

HRMS (ESI)  $m/z$  calcd. for  $\text{C}_{13}\text{H}_{19}\text{N}_2\text{O}_2$   $[\text{M} + \text{H}]^+$  235.1441, found 235.1441.

**Ethyl (S)-1-(1-oxo-1-(phenylamino)propan-2-yl)piperidine-4-carboxylate (32)**

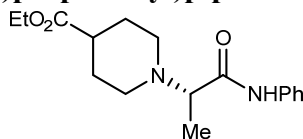

**32**

According to **General Procedure C** with 2-chloro-*N*-phenylpropanamide **E1** (54.9 mg, 0.30 mmol, 1.5 equiv.) and ethyl piperidine-4-carboxylate **A32** (31.4 mg, 0.20 mmol, 1.0 equiv.) for 96 h, the reaction mixture was purified by flash column chromatography on silica gel (petroleum ether/ $\text{EtOAc} = 1/1$ ) to yield the product **32** as a colorless oil (44.4 mg, 73% yield, 92% e.e.).

HPLC analysis: Chiralcel IC (*n*-hexane/*i*-PrOH = 60/40, flow rate 1.0 mL/min,  $\lambda = 254$  nm),  $t_R$  (major) = 10.15 min,  $t_R$  (minor) = 14.84 min.

$^1\text{H}$  NMR (400 MHz,  $\text{CDCl}_3$ )  $\delta$  9.31 (s, 1H), 7.58 – 7.54 (m, 2H), 7.35 – 7.30 (m, 2H), 7.11 – 7.07 (m, 1H), 4.16 (q,  $J = 7.1$  Hz, 2H), 3.23 (q,  $J = 7.0$  Hz, 1H), 2.88 – 2.80 (m, 2H), 2.48 – 2.42 (m, 1H), 2.37 – 2.29 (m, 1H), 2.27 – 2.21 (m, 1H), 2.03 – 1.97 (m, 2H), 1.89 – 1.71 (m, 2H), 1.30 – 1.26 (m, 6H).

$^{13}\text{C}$  NMR (100 MHz,  $\text{CDCl}_3$ )  $\delta$  174.8, 171.8, 137.8, 128.9, 123.9, 119.2, 64.6, 60.4, 51.7, 47.2, 40.7, 28.9, 28.7, 14.2, 10.6.

HRMS (ESI)  $m/z$  calcd. for  $\text{C}_{17}\text{H}_{25}\text{N}_2\text{O}_3$   $[\text{M} + \text{H}]^+$  305.1860, found 305.1861.

**(S)-1-(1-Oxo-1-(phenylamino)propan-2-yl)-N-phenylpiperidine-4-carboxamide (33)**

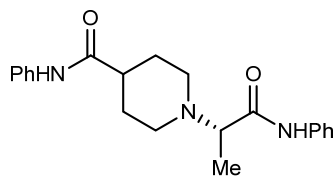

**33**

According to **General procedure C** with 2-chloro-*N*-phenylpropanamide **E1** (54.9 mg, 0.30 mmol, 1.5 equiv.), *N*-phenylpiperidine-4-carboxamide **A33** (40.8 mg, 0.20 mmol, 1.0 equiv.), and Cs<sub>2</sub>CO<sub>3</sub> (260.6 mg, 0.80 mmol, 4.0 equiv.) for 96 h, the reaction mixture was purified by preparative thin-layer chromatography on silica gel (petroleum ether/EtOAc = 1/2) to yield the product **33** as a white solid (42.0 mg, 60% yield, 86% e.e.).

**HPLC** analysis: Chiralcel IG (*n*-hexane/*i*-PrOH = 80/20, flow rate 1.0 mL/min,  $\lambda$  = 254 nm), *t*<sub>R</sub> (minor) = 11.19 min, *t*<sub>R</sub> (major) = 14.29 min.

**<sup>1</sup>H NMR** (400 MHz, CDCl<sub>3</sub>)  $\delta$  9.31 (s, 1H), 8.07 (s, 1H), 7.59 – 7.53 (m, 4H), 7.33 – 7.28 (m, 4H), 7.11 – 7.07 (m, 2H), 3.19 (q, *J* = 7.0 Hz, 1H), 2.90 – 2.80 (m, 2H), 2.37 – 2.22 (m, 2H), 2.15 – 2.08 (m, 1H), 2.02 – 1.83 (m, 4H), 1.26 (d, *J* = 7.0 Hz, 3H).

**<sup>13</sup>C NMR** (100 MHz, CDCl<sub>3</sub>)  $\delta$  173.3, 172.0, 138.0, 137.5, 129.0, 128.8, 124.2, 124.1, 119.8, 119.3, 64.5, 52.1, 46.8, 43.6, 29.4, 29.2, 10.8.

**HRMS** (ESI) *m/z* calcd. for C<sub>21</sub>H<sub>26</sub>N<sub>3</sub>O<sub>2</sub> [M + H]<sup>+</sup> 352.2020, found 352.2022.

**(S)-2-(4-(1*H*-Indol-3-yl)piperidin-1-yl)-*N*-phenylpropanamide (34)**

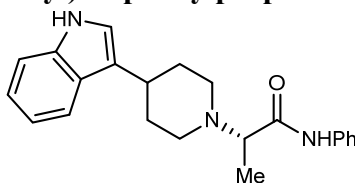

**34**

According to **General procedure C** with 2-chloro-*N*-phenylpropanamide **E1** (54.9 mg, 0.30 mmol, 1.5 equiv.), 3-(piperidin-4-yl)-1*H*-indole **A34** (40.0 mg, 0.20 mmol, 1.0 equiv.) and Cs<sub>2</sub>CO<sub>3</sub> (260.6 mg, 0.80 mmol, 4.0 equiv.) for 96 h, the reaction mixture was purified by flash column chromatography on silica gel (petroleum ether/EtOAc = 1/1) to yield the product **34** as a white solid (61.4 mg, 88% yield, 90% e.e.).

**HPLC** analysis: Chiralcel IC (*n*-hexane/*i*-PrOH = 80/20, flow rate 1.0 mL/min,  $\lambda$  = 254 nm), *t*<sub>R</sub> (minor) = 16.58 min, *t*<sub>R</sub> (major) = 19.53 min.

**<sup>1</sup>H NMR** (400 MHz, CDCl<sub>3</sub>)  $\delta$  9.51 (s, 1H), 8.23 (s, 1H), 7.64 (d, *J* = 7.9 Hz, 1H), 7.61 – 7.58 (m, 2H), 7.36 – 7.31 (m, 3H), 7.21 – 7.17 (m, 1H), 7.14 – 7.07 (m, 2H), 6.97 (d, *J* = 2.3 Hz, 1H), 3.29 (q, *J* = 7.0 Hz, 1H), 2.97 – 2.84 (m, 3H), 2.66 – 2.59 (m, 1H), 2.42 – 2.36 (m, 1H), 2.19 – 2.12 (m, 2H), 1.92 – 1.72 (m, 2H), 1.35 (d, *J* = 7.0 Hz, 3H).

**<sup>13</sup>C NMR** (100 MHz, CDCl<sub>3</sub>)  $\delta$  172.4, 137.9, 136.4, 129.0, 126.4, 123.9, 121.9, 120.7, 119.6, 119.3, 119.03, 118.95, 111.3, 64.7, 53.4, 47.9, 33.5, 33.4, 33.2, 10.8.

**HRMS** (ESI) *m/z* calcd. for C<sub>22</sub>H<sub>26</sub>N<sub>3</sub>O [M + H]<sup>+</sup> 348.2070, found 348.2072.

**(S)-2-(4-(6-Fluorobenzo[d]isoxazol-3-yl)piperidin-1-yl)-*N*-phenylpropanamide (35)**

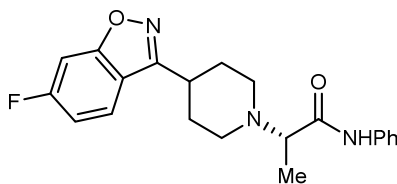

**35**

According to **General Procedure C** with 2-chloro-*N*-phenylpropanamide **E1** (54.9 mg, 0.30 mmol, 1.5 equiv.) and 6-fluoro-3-(piperidin-4-yl)benzo[*d*]isoxazole **A35** (44.0 mg, 0.20 mmol, 1.0 equiv.) for 96 h, the reaction mixture was purified by flash column chromatography on silica gel (petroleum ether/EtOAc = 1/1) to yield the product **35** as a colorless oil (70.6 mg, 96% yield, 96% e.e.).

**HPLC** analysis: Chiralcel IH (*n*-hexane/*i*-PrOH = 80/20, flow rate 1.0 mL/min,  $\lambda$  = 254 nm),  $t_R$  (major) = 9.62 min,  $t_R$  (minor) = 17.57 min.

**<sup>1</sup>H NMR** (400 MHz, CDCl<sub>3</sub>)  $\delta$  9.34 (s, 1H), 7.68 – 7.64 (m, 1H), 7.60 – 7.57 (m, 2H), 7.35 – 7.31 (m, 2H), 7.27 (dd,  $J$  = 8.5, 2.1 Hz, 1H), 7.12 – 7.06 (m, 2H), 3.33 (q,  $J$  = 7.0 Hz, 1H), 3.15 – 2.99 (m, 3H), 2.69 – 2.63 (m, 1H), 2.47 – 2.41 (m, 1H), 2.25 – 2.02 (m, 4H), 1.37 (d,  $J$  = 7.0 Hz, 3H).

**<sup>13</sup>C NMR** (100 MHz, CDCl<sub>3</sub>)  $\delta$  171.6, 164.1 (d,  $J$  = 249.3 Hz), 163.8 (d,  $J$  = 13.5 Hz), 160.7, 137.8, 129.0, 124.0, 122.1 (d,  $J$  = 11.0 Hz), 119.3, 117.3 (d,  $J$  = 1.2 Hz), 112.5 (d,  $J$  = 25.3 Hz), 97.5 (d,  $J$  = 26.6 Hz), 64.7, 52.4, 47.6, 33.9, 31.1, 30.9, 10.8.

**<sup>19</sup>F NMR** (376 MHz, CDCl<sub>3</sub>)  $\delta$  -109.24 (s, 1F).

**HRMS** (ESI)  $m/z$  calcd. for C<sub>21</sub>H<sub>23</sub>FN<sub>3</sub>O<sub>2</sub> [M + H]<sup>+</sup> 368.1769, found 368.1775.

**(S)-2-(4-(4-Chlorophenyl)-4-hydroxypiperidin-1-yl)-*N*-phenylpropanamide (36)**

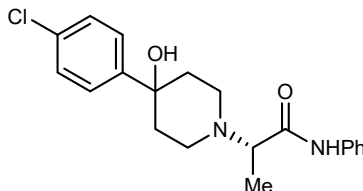

**36**

According to **General Procedure C** with 2-chloro-*N*-phenylpropanamide **E1** (54.9 mg, 0.30 mmol, 1.5 equiv.) and 4-(4-chlorophenyl)piperidin-4-ol **A36** (42.2 mg, 0.20 mmol, 1.0 equiv.) for 96 h, the reaction mixture was purified by preparative thin-layer chromatography on silica gel (EtOAc /CH<sub>3</sub>OH = 20/1) to yield the product **36** as a colorless oil (61.0 mg, 85% yield, 91% e.e.).

**HPLC** analysis: Chiralcel IC (*n*-hexane/*i*-PrOH = 80/20, flow rate 1.0 mL/min,  $\lambda$  = 254 nm),  $t_R$  (major) = 9.22 min,  $t_R$  (minor) = 11.27 min.

**<sup>1</sup>H NMR** (400 MHz, CDCl<sub>3</sub>)  $\delta$  9.37 (s, 1H), 7.56 – 7.53 (m, 2H), 7.48 – 7.44 (m, 2H), 7.35 – 7.30 (m, 4H), 7.12 – 7.08 (m, 1H), 3.28 (q,  $J$  = 7.0 Hz, 1H), 2.96 – 2.90 (m, 1H), 2.76 – 2.70 (m, 3H), 2.20 – 2.04 (m, 3H), 1.88 – 1.81 (m, 2H), 1.35 (d,  $J$  = 7.0 Hz, 3H).

**<sup>13</sup>C NMR** (100 MHz, CDCl<sub>3</sub>)  $\delta$  172.0, 146.5, 137.8, 133.0, 129.0, 128.5, 126.1, 124.1, 119.4, 70.4, 64.6, 48.6, 43.4, 38.7, 38.6, 11.2.

**HRMS** (ESI)  $m/z$  calcd. for C<sub>20</sub>H<sub>24</sub>ClN<sub>2</sub>O<sub>2</sub> [M + H]<sup>+</sup> 359.1521, found 359.1522.

**(S)-2-(4,7-Dihydrothieno[2,3-*c*]pyridin-6(5*H*)-yl)-*N*-phenylpropanamide (37)**

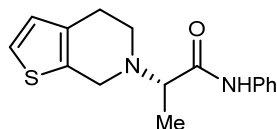

**37**

According to **General Procedure C** with 2-chloro-*N*-phenylpropanamide **E1** (54.9 mg, 0.30 mmol, 1.5 equiv.) and 4,5,6,7-tetrahydrothieno[2,3-*c*]pyridine **A37** (27.8 mg, 0.20 mmol, 1.0 equiv.) for 96 h, the reaction mixture was purified by flash column chromatography on silica gel (petroleum ether/EtOAc = 2/1) to yield the product **37** as a colorless oil (40.0 mg, 70% yield, 88% e.e.).

**HPLC** analysis: Chiralcel IH (*n*-hexane/*i*-PrOH = 90/10, flow rate 0.8 mL/min,  $\lambda$  = 254 nm),  $t_R$  (major) = 11.28 min,  $t_R$  (minor) = 13.94 min.

**<sup>1</sup>H NMR** (400 MHz, CDCl<sub>3</sub>)  $\delta$  9.30 (s, 1H), 7.57 – 7.54 (m, 2H), 7.34 – 7.29 (m, 2H), 7.14 (d,  $J$  = 5.1 Hz, 1H), 7.11 – 7.06 (m, 1H), 6.77 (d,  $J$  = 5.1 Hz, 1H), 3.86 – 3.82 (m, 1H), 3.71 – 3.67 (m, 1H), 3.44 (q,  $J$  = 7.0 Hz, 1H), 2.96 – 2.83 (m, 4H), 1.41 (d,  $J$  = 7.0 Hz, 3H).

**<sup>13</sup>C NMR** (100 MHz, CDCl<sub>3</sub>)  $\delta$  171.8, 137.8, 133.5, 133.1, 129.0, 125.2, 124.0, 123.2, 119.3, 64.0, 49.8, 47.7, 26.0, 11.3.

**HRMS** (ESI)  $m/z$  calcd. for C<sub>16</sub>H<sub>19</sub>N<sub>2</sub>OS [M + H]<sup>+</sup> 287.1213, found 287.1217.

**(S)-*N*-Phenyl-2-(4-(pyrimidin-2-yl)piperazin-1-yl)propanamide (38)**

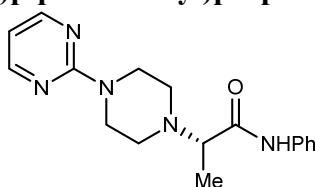

**38**

According to **General Procedure C** with 2-chloro-*N*-phenylpropanamide **E1** (54.9 mg, 0.30 mmol, 1.5 equiv.) and 2-(piperazin-1-yl)pyrimidine **A38** (32.8 mg, 0.20 mmol, 1.0 equiv.) for 96 h, the reaction mixture was purified by preparative thin-layer chromatography on silica gel (EtOAc/CH<sub>3</sub>OH = 25/1) to yield the product **38** as a colorless oil (52.9 mg, 85% yield, 91% e.e.).

**HPLC** analysis: Chiralcel IC (*n*-hexane/*i*-PrOH = 50/50, flow rate 1.0 mL/min,  $\lambda$  = 254 nm),  $t_R$  (major) = 8.70 min,  $t_R$  (minor) = 22.77 min.

**<sup>1</sup>H NMR** (400 MHz, CDCl<sub>3</sub>)  $\delta$  9.32 (s, 1H), 8.33 – 8.32 (m, 2H), 7.60 – 7.57 (m, 2H), 7.36 – 7.31 (m, 2H), 7.13 – 7.08 (m, 1H), 6.53 – 6.51 (m, 1H), 3.97 – 3.85 (m, 4H), 3.27 (q,  $J$  = 7.0 Hz, 1H), 2.73 – 2.68 (m, 2H), 2.65 – 2.59 (m, 2H), 1.33 (d,  $J$  = 7.1 Hz, 3H).

**<sup>13</sup>C NMR** (100 MHz, CDCl<sub>3</sub>)  $\delta$  171.5, 161.5, 157.7, 137.8, 129.0, 124.0, 119.2, 110.2, 64.6, 49.7, 44.0, 11.2.

**HRMS** (ESI)  $m/z$  calcd. for C<sub>17</sub>H<sub>22</sub>N<sub>5</sub>O [M + H]<sup>+</sup> 312.1819, found 312.1819.

**(S)-2-(4-(Benzo[*d*]isothiazol-3-yl)piperazin-1-yl)-*N*-phenylpropanamide (39)**

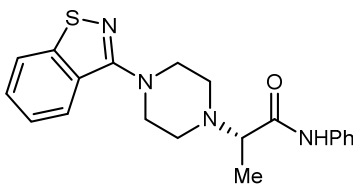

**39**

According to **General Procedure A** with 2-chloro-*N*-phenylpropanamide **E1** (54.9 mg, 0.30 mmol, 1.5 equiv.) and 3-(piperazin-1-yl)benzo[*d*]isothiazole **A39** (43.8 mg, 0.20 mmol, 1.0 equiv.) for 96 h, the reaction mixture was purified by flash column chromatography on silica gel (petroleum ether/EtOAc = 1/1) to yield the product **39** as a colorless oil (57.9 mg, 79% yield, 90% e.e.).

**HPLC** analysis: Chiralcel IC (*n*-hexane/*i*-PrOH = 80/20, flow rate 1.0 mL/min,  $\lambda$  = 254 nm),  $t_R$  (major) = 17.30 min,  $t_R$  (minor) = 22.72 min.

**<sup>1</sup>H NMR** (400 MHz, CDCl<sub>3</sub>)  $\delta$  9.31 (s, 1H), 7.92 – 7.89 (m, 1H), 7.83 – 7.81 (m, 1H), 7.59 – 7.57 (m, 2H), 7.50 – 7.46 (m, 1H), 7.39 – 7.30 (m, 3H), 7.12 – 7.08 (m, 1H), 3.67 – 3.56 (m, 4H), 3.32 (q,  $J$  = 7.0 Hz, 1H), 2.91 – 2.77 (m, 4H), 1.39 (d,  $J$  = 7.1 Hz, 3H).

**<sup>13</sup>C NMR** (100 MHz, CDCl<sub>3</sub>)  $\delta$  171.5, 163.7, 152.7, 137.7, 129.0, 127.9, 127.6, 124.02, 124.00, 123.7, 120.6, 119.2, 64.6, 50.5, 49.6, 11.3.

**HRMS** (ESI)  $m/z$  calcd. for C<sub>20</sub>H<sub>23</sub>N<sub>4</sub>OS [M + H]<sup>+</sup> 367.1587, found 367.1588.

***tert*-Butyl (S)-4-(1-oxo-1-(phenylamino)propan-2-yl)-1,4-diazepane-1-carboxylate (40)**

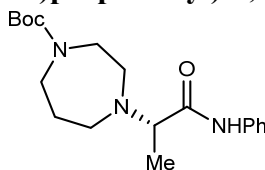

**40**

According to **General Procedure C** with 2-chloro-*N*-phenylpropanamide **E1** (54.9 mg, 0.30 mmol, 1.5 equiv.) and *tert*-butyl 1,4-diazepane-1-carboxylate **A40** (40.0 mg, 0.20 mmol, 1.0 equiv.) for 96 h, the reaction mixture was purified by flash column chromatography on silica gel (petroleum ether/EtOAc = 1/2) to yield the product **40** as a colorless oil (52.1 mg, 75% yield, 93% e.e.).

**HPLC** analysis: Chiralcel IC (*n*-hexane/*i*-PrOH = 60/40, flow rate 1.0 mL/min,  $\lambda$  = 254 nm),  $t_R$  (major) = 9.25 min,  $t_R$  (minor) = 24.08 min.

**<sup>1</sup>H NMR** (400 MHz, CDCl<sub>3</sub>)  $\delta$  9.28 (s, 1H), 7.60 – 7.58 (m, 2H), 7.35 – 7.31 (m, 2H), 7.11 – 7.07 (m, 1H), 3.65 – 3.41 (m, 5H), 2.86 – 2.69 (m, 3H), 2.66 – 2.56 (m, 1H), 1.89 – 1.81 (m, 2H), 1.48 (d,  $J$  = 5.6 Hz, 9H), 1.31 (d,  $J$  = 7.0 Hz, 3H).

**<sup>13</sup>C NMR** (100 MHz, CDCl<sub>3</sub>)  $\delta$  171.5, 155.6, 155.5, 137.8, 129.01, 128.96, 123.9, 119.2, 119.0, 79.6, 65.7, 65.3, 53.4, 53.2, 52.6, 51.6, 47.4, 46.8, 45.82, 45.78, 28.8, 28.6, 28.4, 9.6.

**HRMS** (ESI)  $m/z$  calcd. for C<sub>19</sub>H<sub>30</sub>N<sub>3</sub>O<sub>3</sub> [M + H]<sup>+</sup> 348.2282, found 348.2283.

**(2S)-*N*-Phenyl-2-(1,2,4,5-tetrahydro-3*H*-1,5-methanobenzo[*d*]azepin-3-yl)propanamide (41)**

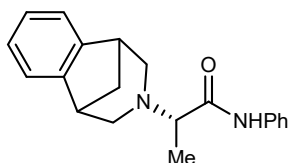

41

According to **General Procedure C** with 2-chloro-*N*-phenylpropanamide **E1** (54.9 mg, 0.30 mmol, 1.5 equiv.), 2,3,4,5-tetrahydro-1*H*-1,5-methanobenzo[*d*]azepine hydrochloride **A41** (39.0 mg, 0.20 mmol, 1.0 equiv.), and Cs<sub>2</sub>CO<sub>3</sub> (260.6 mg, 0.80 mmol, 4.0 equiv.) for 96 h, the reaction mixture was purified by flash column chromatography on silica gel (petroleum ether/EtOAc = 1/2) to yield the product **41** as a colorless oil (51.5 mg, 84% yield, 93% e.e.).

**HPLC** analysis: Chiralcel IC (*n*-hexane/*i*-PrOH = 80/20, flow rate 1.0 mL/min,  $\lambda$  = 254 nm), *t*<sub>R</sub> (minor) = 11.88 min, *t*<sub>R</sub> (major) = 13.96 min.

**<sup>1</sup>H NMR** (400 MHz, CDCl<sub>3</sub>)  $\delta$  8.18 (s, 1H), 7.32 – 7.14 (m, 8H), 7.02 – 6.98 (m, 1H), 3.20 – 3.10 (m, 3H), 2.91 – 2.87 (m, 1H), 2.78 – 2.75 (m, 1H), 2.71 – 2.62 (m, 2H), 2.34 – 2.28 (m, 1H), 1.73 (d, *J* = 10.6 Hz, 1H), 1.27 (d, *J* = 7.2 Hz, 3H).

**<sup>13</sup>C NMR** (100 MHz, CDCl<sub>3</sub>)  $\delta$  171.9, 146.0, 145.7, 137.8, 128.5, 126.94, 126.91, 123.4, 122.0, 121.8, 119.0, 62.8, 56.3, 50.0, 43.4, 41.2, 40.6, 10.6.

**HRMS** (ESI) *m/z* calcd. for C<sub>20</sub>H<sub>23</sub>N<sub>2</sub>O [M + H]<sup>+</sup> 307.1805, found 307.1805.

**(2S)-2-(3-Oxo-8-azabicyclo[3.2.1]octan-8-yl)-N-phenylpropanamide (42)**

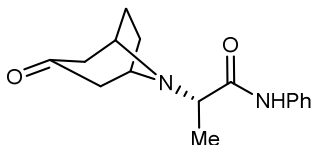

42

According to **General Procedure C** with 2-chloro-*N*-phenylpropanamide **E1** (54.9 mg, 0.30 mmol, 1.5 equiv.), nortropinone hydrochloride **A42** (32.2 mg, 0.20 mmol, 1.0 equiv.), and Cs<sub>2</sub>CO<sub>3</sub> (260.6 mg, 0.80 mmol, 4.0 equiv.) for 96 h, the reaction mixture was purified by flash column chromatography on silica gel (petroleum ether/EtOAc = 1/2) to yield the product **42** as a colorless oil (35.9 mg, 66% yield, 94% e.e.).

**HPLC** analysis: Chiralcel IC (*n*-hexane/*i*-PrOH = 70/30, flow rate 1.0 mL/min,  $\lambda$  = 254 nm), *t*<sub>R</sub> (minor) = 21.72 min, *t*<sub>R</sub> (major) = 24.70 min.

**<sup>1</sup>H NMR** (400 MHz, CDCl<sub>3</sub>)  $\delta$  9.02 (s, 1H), 7.58 – 7.55 (m, 2H), 7.36 – 7.32 (m, 2H), 7.14 – 7.10 (m, 1H), 3.76 – 3.73 (m, 1H), 3.65 – 3.62 (m, 1H), 3.32 (q, *J* = 6.8 Hz, 1H), 2.80 – 2.74 (m, 1H), 2.63 – 2.58 (m, 1H), 2.33 – 2.32 (m, 1H), 2.29 – 2.28 (m, 1H), 2.20 – 2.10 (m, 1H), 2.04 – 1.94 (m, 1H), 1.78 – 1.72 (m, 1H), 1.68 – 1.61 (m, 1H), 1.46 (d, *J* = 6.9 Hz, 3H).

**<sup>13</sup>C NMR** (100 MHz, CDCl<sub>3</sub>)  $\delta$  208.5, 172.5, 137.5, 129.0, 124.2, 119.4, 59.6, 58.1, 55.7, 48.2, 47.6, 28.8, 27.3, 18.0.

**HRMS** (ESI) *m/z* calcd. for C<sub>16</sub>H<sub>21</sub>N<sub>2</sub>O<sub>2</sub> [M + H]<sup>+</sup> 273.1598, found 273.1598.



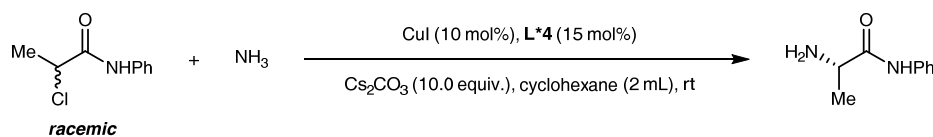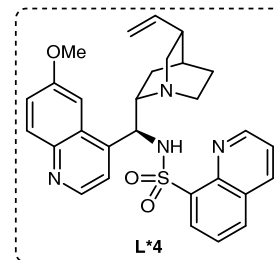

### General procedure D:

Under argon atmosphere, an oven-dried resealable Schlenk tube equipped with a magnetic stir bar was charged with CuI (3.8 mg, 0.02 mmol, 10 mol%), L\*4 (15.4 mg, 0.03 mmol, 15 mol%), Cs<sub>2</sub>CO<sub>3</sub> (651.6 mg, 2.0 mmol, 10.0 equiv.), and anhydrous cyclohexane (2.0 mL). Then, the mixture was stirred at room temperature for 1 h. After that, alkyl chloride (0.20 mmol, 1.0 equiv.), NH<sub>3</sub> (5.0 mL, 2.0 mmol, 10.0 equiv., 0.4 M in 1,4-dioxane) were sequentially added into the mixture and the reaction mixture was stirred at room temperature for 96 h. Upon completion (monitored by TLC), the precipitate was filtered off and washed by EtOAc. The filtrate was evaporated and the residue was purified by preparative thin-layer chromatography on silica gel to afford the desired product.

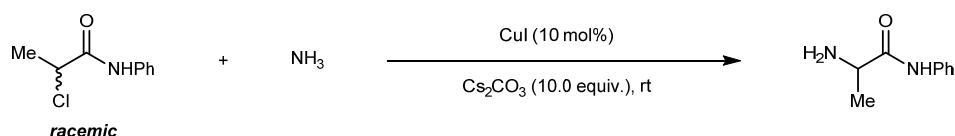

The racemates of products were prepared following the procedure: Under argon atmosphere, an oven-dried resealable Schlenk tube equipped with a magnetic stir bar was charged with CuI (3.8 mg, 0.02 mmol, 10 mol%), Cs<sub>2</sub>CO<sub>3</sub> (651.6 mg, 2.0 mmol, 10.0 equiv.), alkyl chloride (0.20 mmol, 1.0 equiv.), and NH<sub>3</sub> (5.0 mL, 2.0 mmol, 10.0 equiv., 0.4 M in 1,4-dioxane) were sequentially added into the mixture and the reaction mixture was stirred at room temperature for 96 h. Upon completion (monitored by TLC), the precipitate was filtered off and washed by EtOAc. The filtrate was evaporated and the residue was purified by preparative thin-layer chromatography on silica gel to afford the desired product.

### (S)-2-Amino-N-phenylpropanamide (43)

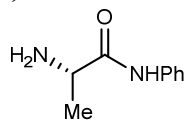

43

According to **General Procedure D** with 2-chloro-N-phenylpropanamide **E1** (36.6 mg, 0.20 mmol, 1.0 equiv.), ammonia **A43** (5.0 mL, 2.0 mmol, 10.0 equiv., 0.4 M in 1,4-dioxane) for 96 h, the reaction mixture was purified by preparative thin-layer chromatography on silica gel (CH<sub>2</sub>Cl<sub>2</sub>/CH<sub>3</sub>OH = 10/1) to yield the product **43** as a colorless oil (7.2 mg, 22% yield, 96% e.e.). **HPLC** analysis: Chiralcel OD3 (*n*-hexane/*i*-PrOH = 90/10, flow rate 0.8 mL/min, λ = 254 nm), *t*<sub>R</sub> (major) = 15.86 min, *t*<sub>R</sub> (minor) = 24.52 min.

**<sup>1</sup>H NMR** (400 MHz, CDCl<sub>3</sub>) δ 9.48 (s, 1H), 7.60 – 7.58 (m, 2H), 7.33 – 7.29 (m, 2H), 7.10 – 7.07 (m, 1H), 3.60 (q, *J* = 7.0 Hz, 1H), 1.76 (s, 2H), 1.41 (d, *J* = 7.0 Hz, 3H).

**<sup>13</sup>C NMR** (100 MHz, CDCl<sub>3</sub>) δ 173.7, 137.8, 128.9, 123.9, 119.3, 51.1, 21.5.

**HRMS** (ESI)  $m/z$  calcd. for  $C_9H_{13}N_2O$   $[M + H]^+$  165.1022, found 165.1022.

**(S)-2-(Methylamino)-*N*-phenylpropanamide (44)**

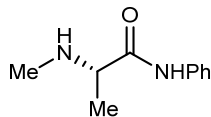

**44**

According to **General Procedure B** with 2-chloro-*N*-phenylpropanamide **E1** (54.9 mg, 0.30 mmol, 1.5 equiv.), methylamine hydrochloride **A44** (13.4 mg, 0.20 mmol, 1.0 equiv.), and  $Cs_2CO_3$  (260.6 mg, 0.80 mmol, 4.0 equiv.) for 96 h, the reaction mixture was purified by preparative thin-layer chromatography on silica gel (EtOAc/CH<sub>3</sub>OH = 4/1) to yield the product **44** as a colorless oil (21.7 mg, 61% yield, 92% e.e.).

**HPLC** analysis: Chiralcel IC (*n*-hexane/*i*-PrOH = 95/5, flow rate 1.0 mL/min,  $\lambda$  = 254 nm),  $t_R$  (major) = 20.36 min,  $t_R$  (minor) = 23.77 min.

**<sup>1</sup>H NMR** (400 MHz, CDCl<sub>3</sub>)  $\delta$  9.36 (s, 1H), 7.63 – 7.60 (m, 2H), 7.35 – 7.30 (m, 2H), 7.13 – 7.08 (m, 1H), 3.38 (q,  $J$  = 7.0 Hz, 1H), 2.70 (s, 1H), 2.50 (s, 3H), 1.44 (d,  $J$  = 7.0 Hz, 3H).

**<sup>13</sup>C NMR** (100 MHz, CDCl<sub>3</sub>)  $\delta$  172.2, 137.7, 129.0, 124.2, 119.5, 60.6, 34.9, 19.1.

**HRMS** (ESI)  $m/z$  calcd. for  $C_{10}H_{15}N_2O$   $[M + H]^+$  179.1179, found 179.1178.

**(S)-2-(Ethylamino)-*N*-phenylpropanamide (45)**

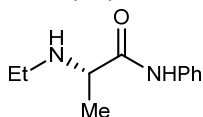

**45**

According to **General Procedure B** with 2-chloro-*N*-phenylpropanamide **E1** (54.9 mg, 0.30 mmol, 1.5 equiv.), ethylamine hydrochloride **A45** (16.2 mg, 0.20 mmol, 1.0 equiv.), and  $Cs_2CO_3$  (260.6 mg, 0.80 mmol, 4.0 equiv.) for 96 h, the reaction mixture was purified by preparative thin-layer chromatography on silica gel (EtOAc/CH<sub>3</sub>OH = 4/1) to yield the product **45** as a colorless oil (27.3 mg, 71% yield, 96% e.e.).

**HPLC** analysis: Chiralcel IC (*n*-hexane/*i*-PrOH = 95/5, flow rate 1.0 mL/min,  $\lambda$  = 254 nm),  $t_R$  (major) = 16.84 min,  $t_R$  (minor) = 22.10 min.

**<sup>1</sup>H NMR** (400 MHz, CDCl<sub>3</sub>)  $\delta$  9.50 (s, 1H), 7.62 – 7.59 (m, 2H), 7.35 – 7.30 (m, 2H), 7.12 – 7.08 (m, 1H), 3.40 (q,  $J$  = 7.0 Hz, 1H), 2.82 – 2.64 (m, 2H), 2.45 (s, 1H), 1.42 (d,  $J$  = 7.0 Hz, 3H), 1.17 (t,  $J$  = 7.1 Hz, 3H).

**<sup>13</sup>C NMR** (100 MHz, CDCl<sub>3</sub>)  $\delta$  172.8, 137.7, 128.9, 124.0, 119.4, 58.6, 43.0, 19.5, 15.1.

**HRMS** (ESI)  $m/z$  calcd. for  $C_{11}H_{17}N_2O$   $[M + H]^+$  193.1335, found 193.1335.

**(S)-*N*-Phenyl-2-(propylamino)propanamide (46)**

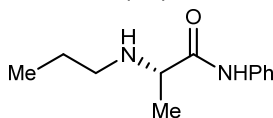

**46**

According to **General Procedure B** with 2-chloro-*N*-phenylpropanamide **E1** (54.9 mg, 0.30 mmol, 1.5 equiv.) and propan-1-amine **A46** (11.8 mg, 0.20 mmol, 1.0 equiv.) for 96 h, the

reaction mixture was purified by preparative thin-layer chromatography on silica gel (EtOAc/CH<sub>3</sub>OH = 25/1) to yield the product **46** as a colorless oil (36.1 mg, 88% yield, 94% e.e.).  
**HPLC** analysis: Chiralcel IC (*n*-hexane/*i*-PrOH = 90/10, flow rate 1.0 mL/min,  $\lambda$  = 254 nm),  $t_R$  (major) = 9.42 min,  $t_R$  (minor) = 11.66 min.

**<sup>1</sup>H NMR** (400 MHz, CDCl<sub>3</sub>)  $\delta$  9.57 (s, 1H), 7.63 – 7.59 (m, 2H), 7.35 – 7.30 (m, 2H), 7.12 – 7.07 (m, 1H), 3.39 (q,  $J$  = 7.0 Hz, 1H), 2.77 – 2.70 (m, 1H), 2.61 – 2.51 (m, 2H), 1.62 – 1.53 (m, 2H), 1.43 (d,  $J$  = 7.0 Hz, 3H), 0.97 (t,  $J$  = 7.4 Hz, 3H).

**<sup>13</sup>C NMR** (100 MHz, CDCl<sub>3</sub>)  $\delta$  172.6, 137.8, 129.0, 124.0, 119.3, 58.8, 50.4, 23.0, 19.4, 11.6.

**HRMS** (ESI)  $m/z$  calcd. for C<sub>12</sub>H<sub>19</sub>N<sub>2</sub>O [M + H]<sup>+</sup> 207.1492, found 207.1491.

### (S)-2-(Allylamino)-*N*-phenylpropanamide (**47**)

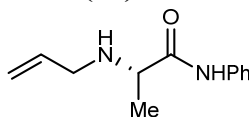

**47**

According to **General Procedure B** with 2-chloro-*N*-phenylpropanamide **E1** (54.9 mg, 0.30 mmol, 1.5 equiv.) and prop-2-en-1-amine **A47** (11.4 mg, 0.20 mmol, 1.0 equiv.) for 96 h, the reaction mixture was purified by preparative thin-layer chromatography on silica gel (petroleum ether/EtOAc = 1/3) to yield the product **47** as a colorless oil (26.6 mg, 65% yield, 90% e.e.).

**HPLC** analysis: Chiralcel IC (*n*-hexane/*i*-PrOH = 80/20, flow rate 1.0 mL/min,  $\lambda$  = 254 nm),  $t_R$  (major) = 6.17 min,  $t_R$  (minor) = 6.99 min.

**<sup>1</sup>H NMR** (400 MHz, CDCl<sub>3</sub>)  $\delta$  9.35 (s, 1H), 7.60 – 7.57 (m, 2H), 7.35 – 7.30 (m, 2H), 7.12 – 7.08 (m, 1H), 5.95 – 5.85 (m, 1H), 5.27 – 5.14 (m, 2H), 3.34 – 3.28 (m, 3H), 1.64 (s, 1H), 1.40 (d,  $J$  = 7.0 Hz, 3H).

**<sup>13</sup>C NMR** (100 MHz, CDCl<sub>3</sub>)  $\delta$  173.1, 137.8, 135.7, 129.0, 124.0, 119.4, 116.6, 58.2, 51.0, 19.7.

**HRMS** (ESI)  $m/z$  calcd. For C<sub>12</sub>H<sub>17</sub>N<sub>2</sub>O [M + H]<sup>+</sup> 205.1335, found 205.1334.

### (S)-2-(Isopropylamino)-*N*-phenylpropanamide (**48**)

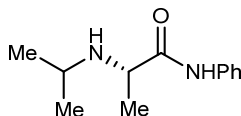

**48**

According to **General Procedure B** with 2-chloro-*N*-phenylpropanamide **E1** (54.9 mg, 0.30 mmol, 1.5 equiv.), propan-2-amine **A48** (11.8 mg, 0.20 mmol, 1.0 equiv.), and **L\*4** (15.4 mg, 0.03 mmol, 15 mol%) for 96 h, the reaction mixture was purified by preparative thin-layer chromatography on silica gel (EtOAc/CH<sub>3</sub>OH = 50/1) to yield the product **48** as a colorless oil (32.3 mg, 78% yield, 93% e.e.).

**HPLC** analysis: Chiralcel IC (*n*-hexane/*i*-PrOH = 95/5, flow rate 1.0 mL/min,  $\lambda$  = 254 nm),  $t_R$  (major) = 15.15 min,  $t_R$  (minor) = 19.07 min.

**<sup>1</sup>H NMR** (400 MHz, CDCl<sub>3</sub>)  $\delta$  9.59 (s, 1H), 7.60 – 7.57 (m, 2H), 7.35 – 7.30 (m, 2H), 7.11 – 7.07 (m, 1H), 3.31 (q,  $J$  = 7.0 Hz, 1H), 2.91 – 2.81 (m, 1H), 1.47 (s, 1H), 1.39 (d,  $J$  = 7.1 Hz, 3H), 1.12 (d,  $J$  = 6.2 Hz, 3H), 1.08 (d,  $J$  = 6.4 Hz, 3H).

**<sup>13</sup>C NMR** (100 MHz, CDCl<sub>3</sub>)  $\delta$  173.9, 137.8, 128.9, 123.9, 119.2, 56.7, 48.7, 23.4, 23.0, 20.3.

**HRMS** (ESI)  $m/z$  calcd. for C<sub>12</sub>H<sub>19</sub>N<sub>2</sub>O [M + H]<sup>+</sup> 207.1492, found 207.1492.

**(S)-2-(tert-Butylamino)-N-phenylpropanamide (49)**

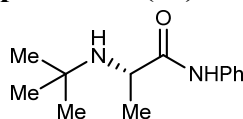

**49**

According to **General Procedure B** with 2-chloro-*N*-phenylpropanamide **E1** (54.9 mg, 0.30 mmol, 1.5 equiv.), 2-methylpropan-2-amine **A49** (14.6 mg, 0.20 mmol, 1.0 equiv.), and **L\*4** (15.4 mg, 0.03 mmol, 15 mol%) for 96 h, the reaction mixture was purified by flash column chromatography on silica gel (petroleum ether/EtOAc = 5/1) to yield the product **49** as a colorless oil (40.7 mg, 92% yield, 93% e.e.).

**HPLC** analysis: Chiralcel IC (*n*-hexane/*i*-PrOH = 90/10, flow rate 1.0 mL/min,  $\lambda$  = 254 nm),  $t_R$  (major) = 9.75 min,  $t_R$  (minor) = 11.99 min.

**<sup>1</sup>H NMR** (400 MHz, CDCl<sub>3</sub>)  $\delta$  9.81 (s, 1H), 7.60 – 7.56 (m, 2H), 7.35 – 7.30 (m, 2H), 7.11 – 7.06 (m, 1H), 3.37 (q,  $J$  = 7.1 Hz, 1H), 1.38 (d,  $J$  = 7.1 Hz, 3H), 1.30 (s, 1H), 1.12 (s, 9H).

**<sup>13</sup>C NMR** (100 MHz, CDCl<sub>3</sub>)  $\delta$  174.6, 137.8, 128.9, 123.8, 119.1, 52.6, 51.4, 29.1, 21.5.

**HRMS** (ESI)  $m/z$  calcd. for C<sub>13</sub>H<sub>21</sub>N<sub>2</sub>O [M + H]<sup>+</sup> 221.1648, found 221.1647.

**(S)-2-(Dimethylamino)-N-phenylpropanamide (50)**

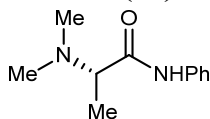

**50**

According to **General Procedure C** with 2-chloro-*N*-phenylpropanamide **E1** (54.9 mg, 0.30 mmol, 1.5 equiv.) and dimethylamine hydrochloride **A50** (16.2 mg, 0.20 mmol, 1.0 equiv.), and Cs<sub>2</sub>CO<sub>3</sub> (260.6 mg, 0.80 mmol, 4.0 equiv.) for 96 h, the reaction mixture was purified by preparative thin-layer chromatography on silica gel (EtOAc/CH<sub>3</sub>OH = 10/1) to yield the product **50** as a colorless oil (33.2 mg, 86% yield, 88% e.e.).

**HPLC** analysis: Chiralcel OJH (*n*-hexane/*i*-PrOH = 98/2, flow rate 1.0 mL/min,  $\lambda$  = 254 nm),  $t_R$  (minor) = 11.98 min,  $t_R$  (major) = 13.94 min.

**<sup>1</sup>H NMR** (400 MHz, CDCl<sub>3</sub>)  $\delta$  9.25 (s, 1H), 7.61 – 7.58 (m, 2H), 7.35 – 7.30 (m, 2H), 7.11 – 7.07 (m, 1H), 3.19 (q,  $J$  = 7.0 Hz, 1H), 2.34 (s, 6H), 1.30 (d,  $J$  = 7.0 Hz, 3H).

**<sup>13</sup>C NMR** (100 MHz, CDCl<sub>3</sub>)  $\delta$  172.0, 138.0, 128.9, 123.9, 119.3, 65.0, 42.1, 11.0.

**HRMS** (ESI)  $m/z$  calcd. for C<sub>11</sub>H<sub>17</sub>N<sub>2</sub>O [M + H]<sup>+</sup> 193.1335, found 193.1335.

**(S)-2-(Diethylamino)-N-phenylpropanamide (51)**

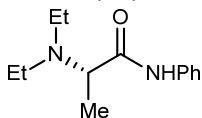

**51**

According to **General Procedure C** with 2-chloro-*N*-phenylpropanamide **E1** (54.9 mg, 0.30 mmol, 1.5 equiv.) and diethylamine **A51** (14.6 mg, 0.20 mmol, 1.0 equiv.) for 96 h, the reaction mixture was purified by preparative thin-layer chromatography on silica gel (EtOAc/CH<sub>3</sub>OH = 10/1) to yield the product **51** as a colorless oil (35.7 mg, 81% yield, 90% e.e.).

**HPLC** analysis: Chiralcel IA (*n*-hexane/*i*-PrOH = 97/3, flow rate 1.0 mL/min,  $\lambda$  = 254 nm),  $t_R$

(major) = 9.21 min,  $t_R$  (minor) = 10.30 min.

**$^1\text{H}$  NMR** (400 MHz,  $\text{CDCl}_3$ )  $\delta$  9.58 (s, 1H), 7.58 – 7.55 (m, 2H), 7.35 – 7.30 (m, 2H), 7.10 – 7.06 (m, 1H), 3.48 (q,  $J$  = 7.0 Hz, 1H), 2.68 – 2.59 (m, 2H), 2.54 – 2.45 (m, 2H), 1.27 (d,  $J$  = 7.0 Hz, 3H), 1.11 (t,  $J$  = 7.1 Hz, 6H).

**$^{13}\text{C}$  NMR** (100 MHz,  $\text{CDCl}_3$ )  $\delta$  173.1, 138.0, 129.0, 123.7, 119.0, 59.8, 44.3, 13.6, 9.0.

**HRMS** (ESI)  $m/z$  calcd. for  $\text{C}_{13}\text{H}_{21}\text{N}_2\text{O}$   $[\text{M} + \text{H}]^+$  221.1648, found 221.1647.

### (S)-2-(Dipropylamino)-*N*-phenylpropanamide (**52**)

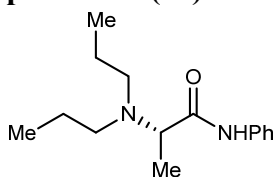

**52**

According to **General Procedure C** with 2-chloro-*N*-phenylpropanamide **E1** (54.9 mg, 0.30 mmol, 1.5 equiv.) and dipropylamine **A52** (20.2 mg, 0.20 mmol, 1.0 equiv.) for 96 h, the reaction mixture was purified by flash column chromatography on silica gel (petroleum ether/EtOAc = 5/1) to yield the product **52** as a colorless oil (35.8 mg, 72% yield, 91% e.e.).

**HPLC** analysis: Chiralcel IC (*n*-hexane/*i*-PrOH = 95/5, flow rate 1.0 mL/min,  $\lambda$  = 254 nm),  $t_R$  (major) = 13.01 min,  $t_R$  (minor) = 14.26 min.

**$^1\text{H}$  NMR** (400 MHz,  $\text{CDCl}_3$ )  $\delta$  9.61 (s, 1H), 7.59 – 7.55 (m, 2H), 7.35 – 7.30 (m, 2H), 7.10 – 7.06 (m, 1H), 3.47 (q,  $J$  = 7.0 Hz, 1H), 2.49 – 2.38 (m, 4H), 1.62 – 1.43 (m, 4H), 1.27 (d,  $J$  = 7.0 Hz, 3H), 0.94 (t,  $J$  = 7.4 Hz, 6H).

**$^{13}\text{C}$  NMR** (100 MHz,  $\text{CDCl}_3$ )  $\delta$  172.9, 138.1, 129.0, 123.6, 118.8, 60.1, 52.5, 21.3, 11.9, 8.2.

**HRMS** (ESI)  $m/z$  calcd. for  $\text{C}_{15}\text{H}_{25}\text{N}_2\text{O}$   $[\text{M} + \text{H}]^+$  249.1961, found 249.1959.

### (S)-2-(Diallylamino)-*N*-phenylpropanamide (**53**)

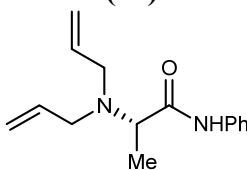

**53**

According to **General Procedure C** with 2-chloro-*N*-phenylpropanamide **E1** (54.9 mg, 0.30 mmol, 1.5 equiv.) and diallylamine **A53** (19.4 mg, 0.20 mmol, 1.0 equiv.) for 96 h, the reaction mixture was purified by flash column chromatography on silica gel (petroleum ether/EtOAc = 5/1) to yield the product **53** as a colorless oil (29.8 mg, 61% yield, 88% e.e.).

**HPLC** analysis: Chiralcel IA (*n*-hexane/*i*-PrOH = 97/3, flow rate 1.0 mL/min,  $\lambda$  = 254 nm),  $t_R$  (major) = 11.15 min,  $t_R$  (minor) = 11.99 min.

**$^1\text{H}$  NMR** (400 MHz,  $\text{CDCl}_3$ )  $\delta$  9.42 (s, 1H), 7.57 – 7.53 (m, 2H), 7.34 – 7.29 (m, 2H), 7.11 – 7.06 (m, 1H), 5.91 – 5.81 (m, 2H), 5.30 – 5.20 (m, 4H), 3.61 (q,  $J$  = 7.0 Hz, 1H), 3.31 – 3.25 (m, 2H), 3.03 – 2.98 (m, 2H), 1.28 (d,  $J$  = 7.0 Hz, 3H).

**$^{13}\text{C}$  NMR** (100 MHz,  $\text{CDCl}_3$ )  $\delta$  172.3, 137.9, 135.3, 129.0, 123.8, 119.1, 117.9, 59.0, 53.3, 8.2.

**HRMS** (ESI)  $m/z$  calcd. for  $\text{C}_{15}\text{H}_{21}\text{N}_2\text{O}$   $[\text{M} + \text{H}]^+$  245.1648, found 245.1647.

### (S)-*N*-Phenyl-2-(pyrrolidin-1-yl)propanamide (**54**)

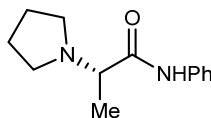

**54**

According to **General Procedure C** with 2-chloro-*N*-phenylpropanamide **E1** (54.9 mg, 0.30 mmol, 1.5 equiv.) and pyrrolidine **A54** (14.2 mg, 0.20 mmol, 1.0 equiv.) for 96 h, the reaction mixture was purified by flash column chromatography on silica gel (petroleum ether/EtOAc = 1/1) to yield the product **54** as a colorless oil (42.8 mg, 98% yield, 90% e.e.).

**HPLC** analysis: Chiralcel ADH (*n*-hexane/*i*-PrOH = 95/5, flow rate 0.5 mL/min,  $\lambda$  = 254 nm),  $t_R$  (major) = 18.12 min,  $t_R$  (minor) = 19.72 min.

**$^1\text{H}$  NMR** (400 MHz,  $\text{CDCl}_3$ )  $\delta$  9.00 (s, 1H), 7.59 – 7.56 (m, 2H), 7.35 – 7.30 (m, 2H), 7.11 – 7.07 (m, 1H), 3.07 (q,  $J$  = 7.0 Hz, 1H), 2.71 – 2.60 (m, 4H), 1.87 – 1.80 (m, 4H), 1.39 (d,  $J$  = 6.9 Hz, 3H).

**$^{13}\text{C}$  NMR** (100 MHz,  $\text{CDCl}_3$ )  $\delta$  172.8, 138.0, 128.9, 123.9, 119.4, 64.3, 51.2, 23.5, 16.6.

**HRMS** (ESI)  $m/z$  calcd. for  $\text{C}_{13}\text{H}_{19}\text{N}_2\text{O}$   $[\text{M} + \text{H}]^+$  219.1492, found 219.1495.

**(S)-N-Phenyl-2-(piperidin-1-yl)propanamide (55)**

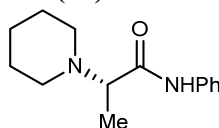

**55**

According to **General Procedure C** with 2-chloro-*N*-phenylpropanamide **E1** (54.9 mg, 0.30 mmol, 1.5 equiv.) and piperidine **A55** (17.0 mg, 0.20 mmol, 1.0 equiv.) for 96 h, the reaction mixture was purified by flash column chromatography on silica gel (petroleum ether/EtOAc = 1/1) to yield the product **55** as a colorless oil (37.1 mg, 80% yield, 93% e.e.).

**HPLC** analysis: Chiralcel IC (*n*-hexane/*i*-PrOH = 90/10, flow rate 1.0 mL/min,  $\lambda$  = 254 nm),  $t_R$  (major) = 14.58 min,  $t_R$  (minor) = 18.07 min.

**$^1\text{H}$  NMR** (400 MHz,  $\text{CDCl}_3$ )  $\delta$  9.49 (s, 1H), 7.59 – 7.55 (m, 2H), 7.35 – 7.30 (m, 2H), 7.10 – 7.06 (m, 1H), 3.18 (q,  $J$  = 7.1 Hz, 1H), 2.60 – 2.54 (m, 2H), 2.49 – 2.45 (m, 2H), 1.72 – 1.57 (m, 4H), 1.52 – 1.45 (m, 2H), 1.28 (d,  $J$  = 7.1 Hz, 3H).

**$^{13}\text{C}$  NMR** (100 MHz,  $\text{CDCl}_3$ )  $\delta$  172.3, 138.0, 128.9, 123.7, 119.1, 64.9, 50.9, 26.6, 24.1, 10.4.

**HRMS** (ESI)  $m/z$  calcd. for  $\text{C}_{14}\text{H}_{21}\text{N}_2\text{O}$   $[\text{M} + \text{H}]^+$  233.1648, found 233.1647.

**(S)-2-(Azepan-1-yl)-N-phenylpropanamide (56)**

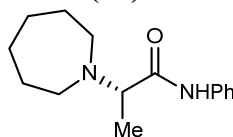

**56**

According to **General Procedure C** with 2-chloro-*N*-phenylpropanamide **E1** (54.9 mg, 0.30 mmol, 1.5 equiv.) and azepane **A56** (19.8 mg, 0.20 mmol, 1.0 equiv.) for 96 h, the reaction mixture was purified by flash column chromatography on silica gel (petroleum ether/EtOAc = 1/1) to yield the product **56** as a colorless oil (40.3 mg, 82% yield, 93% e.e.).

**HPLC** analysis: Chiralcel IC (*n*-hexane/*i*-PrOH = 80/20, flow rate 1.0 mL/min,  $\lambda$  = 254 nm),  $t_R$  (major) = 9.44 min,  $t_R$  (minor) = 15.03 min.

**<sup>1</sup>H NMR** (400 MHz, CDCl<sub>3</sub>) δ 9.53 (s, 1H), 7.59 – 7.56 (m, 2H), 7.35 – 7.30 (m, 2H), 7.10 – 7.06 (m, 1H), 3.41 (q, *J* = 6.9 Hz, 1H), 2.75 – 2.62 (m, 4H), 1.78 – 1.66 (m, 8H), 1.30 (d, *J* = 6.9 Hz, 3H).

**<sup>13</sup>C NMR** (100 MHz, CDCl<sub>3</sub>) δ 172.3, 138.0, 129.0, 123.7, 118.9, 65.7, 53.0, 29.3, 26.8, 9.4.

**HRMS** (ESI) *m/z* calcd. for C<sub>15</sub>H<sub>23</sub>N<sub>2</sub>O [*M* + *H*]<sup>+</sup> 247.1805, found 247.1808.

**(*S*)-*N*-Phenyl-2-((4-(trifluoromethyl)benzyl)amino)propanamide (**57**)**

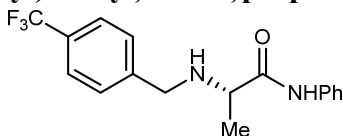

**57**

According to **General procedure A** with 2-chloro-*N*-phenylpropanamide **E1** (54.9 mg, 0.30 mmol, 1.5 equiv.) and (4-(trifluoromethyl)phenyl)methanamine **A57** (35.0 mg, 0.20 mmol, 1.0 equiv.) for 72 h, the reaction mixture was purified by flash column chromatography on silica gel (petroleum ether/EtOAc = 1/1) to yield the product **57** as a colorless oil (49.6 mg, 77% yield, 95% e.e.).

**HPLC** analysis: Chiralcel IC (*n*-hexane/*i*-PrOH = 90/10, flow rate 1.0 mL/min, λ = 254 nm), *t<sub>R</sub>* (major) = 7.50 min, *t<sub>R</sub>* (minor) = 10.83 min.

**<sup>1</sup>H NMR** (400 MHz, CDCl<sub>3</sub>) δ 9.21 (s, 1H), 7.62 – 7.60 (m, 2H), 7.56 – 7.54 (m, 2H), 7.46 – 7.44 (m, 2H), 7.34 – 7.30 (m, 2H), 7.12 – 7.09 (m, 1H), 3.88 (s, 2H), 3.36 (q, *J* = 7.0 Hz, 1H), 1.95 (s, 1H), 1.42 (d, *J* = 6.9 Hz, 3H).

**<sup>13</sup>C NMR** (100 MHz, CDCl<sub>3</sub>) δ 172.6, 143.2, 137.6, 129.8 (q, *J* = 32.2 Hz), 129.0, 128.2, 125.7 (q, *J* = 3.8 Hz), 124.2, 124.0 (q, *J* = 270.4 Hz), 119.3, 58.6, 52.2, 19.7.

**<sup>19</sup>F NMR** (376 MHz, CDCl<sub>3</sub>) δ -62.50 (s, 3F).

**HRMS** (ESI) *m/z* calcd. for C<sub>17</sub>H<sub>18</sub>F<sub>3</sub>N<sub>2</sub>O [*M* + *H*]<sup>+</sup> 323.1366, found 323.1361.

**(*S*)-2-((3-Nitrobenzyl)amino)-*N*-phenylpropanamide (**58**)**

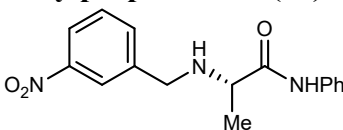

**58**

According to **General procedure A** with 2-chloro-*N*-phenylpropanamide **E1** (54.9 mg, 0.30 mmol, 1.5 equiv.), (3-nitrophenyl)methanamine hydrochloride **A58** (37.6 mg, 0.20 mmol, 1.0 equiv.), and Cs<sub>2</sub>CO<sub>3</sub> (260.6 mg, 0.80 mmol, 4.0 equiv.) for 72 h, the reaction mixture was purified by flash column chromatography on silica gel (petroleum ether/EtOAc = 1/2) to yield the product **58** as a white solid (41.3 mg, 69% yield, 95% e.e.).

**HPLC** analysis: Chiralcel IG (*n*-hexane/*i*-PrOH = 90/10, flow rate 1.0 mL/min, λ = 254 nm), *t<sub>R</sub>* (major) = 28.26 min, *t<sub>R</sub>* (minor) = 30.67 min.

**<sup>1</sup>H NMR** (400 MHz, CDCl<sub>3</sub>) δ 9.13 (s, 1H), 8.26 – 8.25 (m, 1H), 8.15 – 8.12 (m, 1H), 7.66 – 7.64 (m, 1H), 7.58 – 7.55 (m, 2H), 7.54 – 7.50 (m, 1H), 7.35 – 7.30 (m, 2H), 7.13 – 7.09 (m, 1H), 3.99 – 3.90 (m, 2H), 3.37 (q, *J* = 7.0 Hz, 1H), 1.88 (s, 1H), 1.45 (d, *J* = 6.9 Hz, 3H).

**<sup>13</sup>C NMR** (100 MHz, CDCl<sub>3</sub>) δ 172.4, 148.5, 141.3, 137.5, 134.1, 129.6, 129.0, 124.2, 122.7, 122.5, 119.3, 58.6, 51.8, 19.6.

**HRMS** (ESI) *m/z* calcd. for C<sub>16</sub>H<sub>18</sub>N<sub>3</sub>O<sub>3</sub> [*M* + *H*]<sup>+</sup> 300.1343, found 300.1339.

**(S)-2-((Benzo[d][1,3]dioxol-5-ylmethyl)amino)-N-phenylpropanamide (59)**

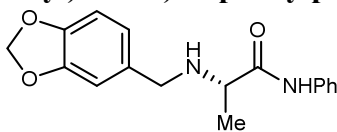

59

According to **General procedure A** with 2-chloro-*N*-phenylpropanamide **E1** (54.9 mg, 0.30 mmol, 1.5 equiv.) and benzo[d][1,3]dioxol-5-ylmethanamine **A59** (30.2 mg, 0.20 mmol, 1.0 equiv.) for 72 h, the reaction mixture was purified by flash column chromatography on silica gel (petroleum ether/EtOAc = 1/2) to yield the product **59** as a white solid (49.5 mg, 83% yield, 93% e.e.).

**HPLC** analysis: Chiralcel IC (*n*-hexane/*i*-PrOH = 90/10, flow rate 1.0 mL/min,  $\lambda$  = 254 nm),  $t_R$  (major) = 19.76 min,  $t_R$  (minor) = 34.00 min.

**<sup>1</sup>H NMR** (400 MHz, CDCl<sub>3</sub>)  $\delta$  9.34 (s, 1H), 7.58 – 7.56 (m, 2H), 7.34 – 7.30 (m, 2H), 7.11 – 7.08 (m, 1H), 6.81 (s, 1H), 6.76 (s, 2H), 5.93 – 5.91 (m, 2H), 3.72 (s, 2H), 3.36 (q,  $J$  = 7.0 Hz, 1H), 2.11 (s, 1H), 1.40 (d,  $J$  = 7.0 Hz, 3H).

**<sup>13</sup>C NMR** (100 MHz, CDCl<sub>3</sub>)  $\delta$  172.7, 147.9, 146.9, 137.7, 132.8, 128.9, 124.0, 121.4, 119.3, 108.5, 108.3, 101.0, 58.2, 52.5, 19.6.

**HRMS** (ESI)  $m/z$  calcd. for C<sub>17</sub>H<sub>19</sub>N<sub>2</sub>O<sub>3</sub> [M + H]<sup>+</sup> 299.1390, found 299.1387.

**(S)-2-(Phenethylamino)-N-phenylpropanamide (60)**

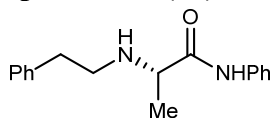

60

According to **General Procedure B** with 2-chloro-*N*-phenylpropanamide **E1** (54.9 mg, 0.30 mmol, 1.5 equiv.), 2-phenylethan-1-amine **A60** (24.2 mg, 0.20 mmol, 1.0 equiv.), anhydrous NMP (2.8 mL) and anhydrous EtOAc (1.2 mL) for 96 h, the reaction mixture was purified by flash column chromatography on silica gel (petroleum ether/EtOAc = 1/1) to yield the product **60** as a colorless oil (38.1 mg, 71% yield, 91% e.e.).

**HPLC** analysis: Chiralcel IC (*n*-hexane/*i*-PrOH = 90/10, flow rate 1.0 mL/min,  $\lambda$  = 254 nm),  $t_R$  (major) = 13.96 min,  $t_R$  (minor) = 19.20 min.

**<sup>1</sup>H NMR** (400 MHz, CDCl<sub>3</sub>)  $\delta$  9.14 (s, 1H), 7.39 – 7.35 (m, 2H), 7.34 – 7.20 (m, 7H), 7.08 – 7.04 (m, 1H), 3.25 (q,  $J$  = 7.0 Hz, 1H), 3.04 – 2.98 (m, 1H), 2.87 – 2.73 (m, 3H), 1.47 (s, 1H), 1.34 (d,  $J$  = 7.0 Hz, 3H).

**<sup>13</sup>C NMR** (100 MHz, CDCl<sub>3</sub>)  $\delta$  173.1, 139.6, 137.7, 128.762, 128.757, 128.6, 126.3, 123.8, 119.2, 58.7, 49.6, 36.4, 19.6.

**HRMS** (ESI)  $m/z$  calcd. for C<sub>17</sub>H<sub>21</sub>N<sub>2</sub>O [M + H]<sup>+</sup> 269.1648, found 269.1647.

**(S)-N-Phenyl-2-((2-(thiophen-2-yl)ethyl)amino)propanamide (61)**

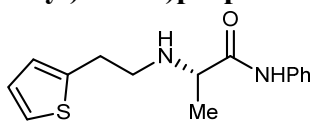

61



According to **General Procedure B** with 2-bromo-*N*-phenylpropanamide **E1** (54.9 mg, 0.30 mmol, 1.5 equiv.) and 2-(thiophen-2-yl)ethan-1-amine **A61** (25.4 mg, 0.20 mmol, 1.0 equiv.) for 96 h, the reaction mixture was purified by flash column chromatography on silica gel (petroleum ether/EtOAc = 1/1) to yield the product **61** as a colorless oil (25.0 mg, 46% yield, 92% e.e.).

**HPLC** analysis: Chiralcel IC (*n*-hexane/*i*-PrOH = 90/10, flow rate 1.0 mL/min,  $\lambda$  = 254 nm),  $t_R$  (major) = 14.36 min,  $t_R$  (minor) = 20.48 min.

**$^1\text{H}$  NMR** (400 MHz,  $\text{CDCl}_3$ )  $\delta$  9.24 (s, 1H), 7.47 – 7.44 (m, 2H), 7.31 – 7.26 (m, 2H), 7.19 – 7.18 (m, 1H), 7.09 – 7.05 (m, 1H), 6.98 – 6.96 (m, 1H), 6.87 – 6.85 (m, 1H), 3.28 (q,  $J$  = 7.0 Hz, 1H), 3.10 – 2.95 (m, 3H), 2.89 – 2.82 (m, 1H), 1.58 (s, 1H), 1.37 (d,  $J$  = 7.0 Hz, 3H).

**$^{13}\text{C}$  NMR** (100 MHz,  $\text{CDCl}_3$ )  $\delta$  173.0, 141.9, 137.7, 128.8, 127.0, 125.4, 123.9, 123.8, 119.3, 58.7, 49.7, 30.5, 19.6.

**HRMS** (ESI)  $m/z$  calcd. for  $\text{C}_{15}\text{H}_{19}\text{N}_2\text{OS}$   $[\text{M} + \text{H}]^+$  275.1213, found 275.1208.

***tert*-Butyl (S)-methyl(2-((1-oxo-1-(phenylamino)propan-2-yl)amino)ethyl)carbamate (62)**

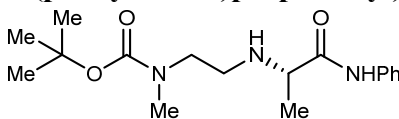

**62**

According to **General Procedure B** with 2-chloro-*N*-phenylpropanamide **E1** (54.9 mg, 0.30 mmol, 1.5 equiv.) and *tert*-butyl (2-aminoethyl)(methyl)carbamate **A62** (34.8 mg, 0.20 mmol, 1.0 equiv.) for 96 h, the reaction mixture was purified by preparative thin-layer chromatography on silica gel (EtOAc) to yield the product **62** as a colorless oil (48.2 mg, 75% yield, 94% e.e.).

**HPLC** analysis: Chiralcel IC (*n*-hexane/*i*-PrOH = 90/10, flow rate 1.0 mL/min,  $\lambda$  = 254 nm),  $t_R$  (minor) = 24.36 min,  $t_R$  (major) = 26.00 min.

**$^1\text{H}$  NMR** (400 MHz,  $\text{CDCl}_3$ )  $\delta$  9.35 (d,  $J$  = 40.3 Hz, 1H), 7.64 – 7.60 (m, 2H), 7.35 – 7.30 (m, 2H), 7.11 – 7.07 (m, 1H), 3.49 – 3.26 (m, 3H), 2.90 (s, 3H), 2.86 – 2.74 (m, 2H), 1.75 (s, 1H), 1.47 (s, 9H), 1.39 (d,  $J$  = 6.9 Hz, 3H).

**$^{13}\text{C}$  NMR** (100 MHz,  $\text{CDCl}_3$ )  $\delta$  173.1, 156.2, 137.8, 128.9, 123.9, 119.2, 79.8, 58.8, 48.4, 46.5, 34.6, 28.4, 19.7.

**HRMS** (ESI)  $m/z$  calcd. For  $\text{C}_{17}\text{H}_{28}\text{N}_3\text{O}_3$   $[\text{M} + \text{H}]^+$  322.2125, found 322.2122.

**(S)-2-((2-Methoxyethyl)amino)-*N*-phenylpropanamide (63)**

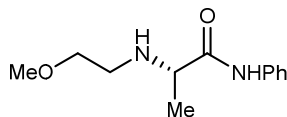

**63**

According to **General Procedure B** with 2-chloro-*N*-phenylpropanamide **E1** (54.9 mg, 0.30 mmol, 1.5 equiv.) and 2-methoxyethan-1-amine **A63** (15.0 mg, 0.20 mmol, 1.0 equiv.) for 96 h, the reaction mixture was purified by preparative thin-layer chromatography on silica gel (EtOAc/ $\text{CH}_3\text{OH}$  = 25/1) to yield the product **63** as a colorless oil (33.8 mg, 76% yield, 89% e.e.).

**HPLC** analysis: Chiralcel IC (*n*-hexane/*i*-PrOH = 80/20, flow rate 1.0 mL/min,  $\lambda$  = 254 nm),  $t_R$  (major) = 8.88 min,  $t_R$  (minor) = 10.48 min.

**$^1\text{H}$  NMR** (400 MHz,  $\text{CDCl}_3$ )  $\delta$  9.60 (s, 1H), 7.64 – 7.61 (m, 2H), 7.35 – 7.30 (m, 2H), 7.12 – 7.07 (m, 1H), 3.57 – 3.44 (m, 3H), 3.39 (s, 3H), 3.01 – 2.96 (m, 1H), 2.83 – 2.78 (m, 1H), 2.30 (s, 1H), 1.45 (d,  $J$  = 7.0 Hz, 3H).

$^{13}\text{C}$  NMR (100 MHz,  $\text{CDCl}_3$ )  $\delta$  172.4, 137.9, 128.9, 124.0, 119.4, 71.0, 58.9, 58.6, 47.9, 19.4.  
HRMS (ESI)  $m/z$  calcd. for  $\text{C}_{12}\text{H}_{19}\text{N}_2\text{O}_2$   $[\text{M} + \text{H}]^+$  223.1441, found 223.1439.

**(S)-2-((2-Fluoroethyl)amino)-N-phenylpropanamide (64)**

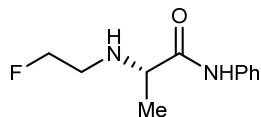

64

According to **General Procedure B** with 2-chloro-*N*-phenylpropanamide **E1** (54.9 mg, 0.30 mmol, 1.5 equiv.), 2-fluoroethan-1-amine hydrochloride **A64** (19.8 mg, 0.20 mmol, 1.0 equiv.), and  $\text{Cs}_2\text{CO}_3$  (260.6 mg, 0.80 mmol, 4.0 equiv.) for 96 h, the reaction mixture was purified by preparative thin-layer chromatography on silica gel ( $\text{EtOAc}/\text{CH}_3\text{OH} = 25/1$ ) to yield the product **64** as a colorless oil (26.9 mg, 64% yield, 91% e.e.).

HPLC analysis: Chiralcel IC (*n*-hexane/*i*-PrOH = 80/20, flow rate 1.0 mL/min,  $\lambda = 254$  nm),  $t_R$  (major) = 8.44 min,  $t_R$  (minor) = 12.87 min.

$^1\text{H}$  NMR (400 MHz,  $\text{CDCl}_3$ )  $\delta$  9.31 (s, 1H), 7.61 – 7.57 (m, 2H), 7.35 – 7.30 (m, 2H), 7.12 – 7.08 (m, 1H), 4.65 – 4.57 (m, 1H), 4.53 – 4.45 (m, 1H), 3.33 (q,  $J = 7.0$  Hz, 1H), 3.14 – 3.01 (m, 1H), 2.94 – 2.81 (m, 1H), 1.67 (s, 1H), 1.43 (d,  $J = 7.0$  Hz, 3H).

$^{13}\text{C}$  NMR (100 MHz,  $\text{CDCl}_3$ )  $\delta$  172.7, 137.7, 129.0, 124.1, 119.4, 82.9 (d,  $J = 165.6$  Hz), 58.6, 48.5 (d,  $J = 19.3$  Hz), 19.7.

$^{19}\text{F}$  NMR (376 MHz,  $\text{CDCl}_3$ )  $\delta$  -223.98 (s, 1F).

HRMS (ESI)  $m/z$  calcd. For  $\text{C}_{11}\text{H}_{16}\text{FN}_2\text{O}$   $[\text{M} + \text{H}]^+$  211.1241, found 211.1239.

**(S)-2-((2-Cyanoethyl)amino)-N-phenylpropanamide (65)**

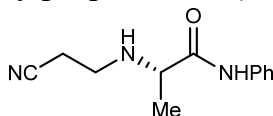

65

According to **General Procedure B** with 2-chloro-*N*-phenylpropanamide **E1** (54.9 mg, 0.30 mmol, 1.5 equiv.) and 3-aminopropanenitrile **A65** (14.0 mg, 0.20 mmol, 1.0 equiv.) for 96 h, the reaction mixture was purified by preparative thin-layer chromatography on silica gel ( $\text{EtOAc}/\text{CH}_3\text{OH} = 50/1$ ) to yield the product **65** as a colorless oil (21.7 mg, 50% yield, 90% e.e.).

HPLC analysis: Chiralcel IC (*n*-hexane/*i*-PrOH = 60/40, flow rate 1.0 mL/min,  $\lambda = 254$  nm),  $t_R$  (major) = 7.89 min,  $t_R$  (minor) = 12.51 min.

$^1\text{H}$  NMR (400 MHz,  $\text{CDCl}_3$ )  $\delta$  9.22 (s, 1H), 7.68 – 7.64 (m, 2H), 7.35 – 7.30 (m, 2H), 7.13 – 7.08 (m, 1H), 3.32 (q,  $J = 7.0$  Hz, 1H), 3.09 – 3.03 (m, 1H), 2.89 – 2.82 (m, 1H), 2.61 – 2.49 (m, 2H), 1.65 (s, 1H), 1.44 (d,  $J = 7.0$  Hz, 3H).

$^{13}\text{C}$  NMR (100 MHz,  $\text{CDCl}_3$ )  $\delta$  172.2, 137.6, 129.0, 124.2, 119.4, 118.6, 58.5, 43.9, 19.6, 19.2.

HRMS (ESI)  $m/z$  calcd. For  $\text{C}_{12}\text{H}_{16}\text{N}_3\text{O}$   $[\text{M} + \text{H}]^+$  218.1288, found 218.1285.

**Methyl (S)-3-((1-oxo-1-(phenylamino)propan-2-yl)amino)propanoate (66)**

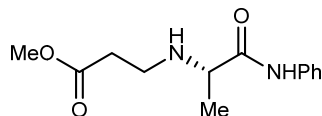

66

According to **General Procedure B** with 2-chloro-*N*-phenylpropanamide **E1** (54.9 mg, 0.30 mmol, 1.5 equiv.), methyl 3-aminopropionate hydrochloride **A66** (27.8 mg, 0.20 mmol, 1.0 equiv.), and Cs<sub>2</sub>CO<sub>3</sub> (260.6 mg, 0.80 mmol, 4.0 equiv.) for 96 h, the reaction mixture was purified by preparative thin-layer chromatography on silica gel (EtOAc/CH<sub>3</sub>OH = 25/1) to yield the product **66** as a colorless oil (30.3 mg, 61% yield, 92% e.e.).

**HPLC** analysis: Chiralcel IC (*n*-hexane/*i*-PrOH = 80/20, flow rate 1.0 mL/min, λ = 254 nm), *t*<sub>R</sub> (major) = 15.18 min, *t*<sub>R</sub> (minor) = 18.50 min.

**<sup>1</sup>H NMR** (400 MHz, CDCl<sub>3</sub>) δ 9.41 (s, 1H), 7.70 – 7.66 (m, 2H), 7.35 – 7.30 (m, 2H), 7.11 – 7.07 (m, 1H), 3.73 (s, 3H), 3.28 (q, *J* = 7.0 Hz, 1H), 3.00 – 2.86 (m, 2H), 2.59 – 2.47 (m, 2H), 1.65 (s, 1H), 1.40 (d, *J* = 7.0 Hz, 3H).

**<sup>13</sup>C NMR** (100 MHz, CDCl<sub>3</sub>) δ 173.0, 172.9, 138.1, 128.9, 124.0, 119.6, 58.8, 51.8, 43.7, 34.2, 19.8.

**HRMS** (ESI) *m/z* calcd. For C<sub>13</sub>H<sub>19</sub>N<sub>2</sub>O<sub>3</sub> [M + H]<sup>+</sup> 251.1390, found 251.1387.

#### (*S*)-2-((3-Morpholino-3-oxopropyl)amino)-*N*-phenylpropanamide (**67**)

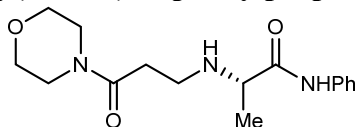

67

According to **General Procedure B** with 2-chloro-*N*-phenylpropanamide **E1** (54.9 mg, 0.30 mmol, 1.5 equiv.), 3-amino-1-morpholinopropan-1-one hydrochloride **A67** (38.8 mg, 0.20 mmol, 1.0 equiv.), and Cs<sub>2</sub>CO<sub>3</sub> (260.6 mg, 0.80 mmol, 4.0 equiv.) for 96 h, the reaction mixture was purified by preparative thin-layer chromatography on silica gel (EtOAc/CH<sub>3</sub>OH = 20/1) to yield the product **67** as a colorless oil (31.1 mg, 51% yield, 95% e.e.).

**HPLC** analysis: Chiralcel IC (*n*-hexane/*i*-PrOH = 70/30, flow rate 0.8 mL/min, λ = 254 nm), *t*<sub>R</sub> (major) = 36.88 min, *t*<sub>R</sub> (minor) = 42.92 min.

**<sup>1</sup>H NMR** (400 MHz, CDCl<sub>3</sub>) δ 9.71 (s, 1H), 7.73 – 7.70 (m, 2H), 7.34 – 7.30 (m, 2H), 7.11 – 7.06 (m, 1H), 3.73 – 3.60 (m, 6H), 3.46 – 3.43 (m, 2H), 3.36 (q, *J* = 7.0 Hz, 1H), 3.06 – 3.00 (m, 1H), 2.95 – 2.90 (m, 1H), 2.58 – 2.46 (m, 2H), 2.29 (s, 1H), 1.42 (d, *J* = 6.9 Hz, 3H).

**<sup>13</sup>C NMR** (100 MHz, CDCl<sub>3</sub>) δ 173.0, 170.1, 138.2, 128.8, 123.8, 119.5, 66.8, 66.4, 58.8, 45.6, 43.5, 41.9, 32.4, 19.7.

**HRMS** (ESI) *m/z* calcd. for C<sub>16</sub>H<sub>24</sub>N<sub>3</sub>O<sub>3</sub> [M + H]<sup>+</sup> 306.1812, found 306.1810.

#### (*S*)-2-(Butylamino)-*N*-phenylpropanamide (**68**)

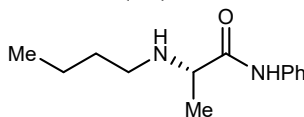

68

According to **General Procedure B** with 2-chloro-*N*-phenylpropanamide **E1** (54.9 mg, 0.30 mmol, 1.5 equiv.) and butan-1-amine **A68** (14.6 mg, 0.20 mmol, 1.0 equiv.) for 96 h, the reaction

mixture was purified by preparative thin-layer chromatography on silica gel (EtOAc) to yield the product **68** as a colorless oil (30.8 mg, 70% yield, 93% e.e.).

**HPLC** analysis: Chiralcel IC (*n*-hexane/*i*-PrOH = 80/20, flow rate 1.0 mL/min,  $\lambda$  = 254 nm),  $t_R$  (major) = 5.86 min,  $t_R$  (minor) = 6.67 min.

**$^1\text{H}$  NMR** (400 MHz,  $\text{CDCl}_3$ )  $\delta$  9.70 (s, 1H), 7.64 – 7.61 (m, 2H), 7.34 – 7.30 (m, 2H), 7.12 – 7.07 (m, 1H), 3.64 – 3.51 (m, 2H), 2.82 – 2.75 (m, 1H), 2.70 – 2.63 (m, 1H), 1.61 – 1.53 (m, 2H), 1.47 (d,  $J$  = 7.0 Hz, 3H), 1.44 – 1.33 (m, 2H), 0.92 (t,  $J$  = 7.3 Hz, 3H).

**$^{13}\text{C}$  NMR** (100 MHz,  $\text{CDCl}_3$ )  $\delta$  171.9, 137.8, 128.9, 124.1, 119.4, 58.7, 48.0, 31.4, 20.2, 19.0, 13.8

**HRMS** (ESI)  $m/z$  calcd. For  $\text{C}_{13}\text{H}_{21}\text{N}_2\text{O}$   $[\text{M} + \text{H}]^+$  221.1648, found 221.1646.

### (*S*)-2-((3-Chloropropyl)amino)-*N*-phenylpropanamide (**69**)

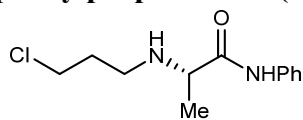

**69**

According to **General Procedure B** with 2-chloro-*N*-phenylpropanamide **E1** (54.9 mg, 0.30 mmol, 1.5 equiv.), 3-chloropropan-1-amine hydrochloride **A69** (25.8 mg, 0.20 mmol, 1.0 equiv.), and  $\text{Cs}_2\text{CO}_3$  (260.6 mg, 0.80 mmol, 4.0 equiv.) for 96 h, the reaction mixture was purified by preparative thin-layer chromatography on silica gel (EtOAc/ $\text{CH}_3\text{OH}$  = 50/1) to yield the product **69** as a colorless oil (25.0 mg, 52% yield, 97% e.e.).

**HPLC** analysis: Chiralcel IC (*n*-hexane/*i*-PrOH = 80/20, flow rate 1.0 mL/min,  $\lambda$  = 254 nm),  $t_R$  (major) = 6.74 min,  $t_R$  (minor) = 8.70 min.

**$^1\text{H}$  NMR** (400 MHz,  $\text{CDCl}_3$ )  $\delta$  9.24 (s, 1H), 7.62 – 7.58 (m, 2H), 7.35 – 7.30 (m, 2H), 7.12 – 7.08 (m, 1H), 3.74 – 3.63 (m, 2H), 3.28 (q,  $J$  = 7.0 Hz, 1H), 2.91 – 2.77 (m, 2H), 2.02 – 1.96 (m, 2H), 1.52 (s, 1H), 1.41 (d,  $J$  = 7.0 Hz, 3H).

**$^{13}\text{C}$  NMR** (100 MHz,  $\text{CDCl}_3$ )  $\delta$  172.9, 137.7, 129.0, 124.0, 119.4, 59.1, 45.6, 42.5, 32.5, 19.8.

**HRMS** (ESI)  $m/z$  calcd. For  $\text{C}_{12}\text{H}_{18}\text{ClN}_2\text{O}$   $[\text{M} + \text{H}]^+$  241.1102, found 241.1098.

### (*S*)-2-((4,4-Diethoxybutyl)amino)-*N*-phenylpropanamide (**70**)

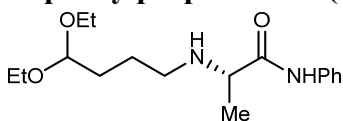

**70**

According to **General Procedure B** with 2-chloro-*N*-phenylpropanamide **E1** (54.9 mg, 0.30 mmol, 1.5 equiv.) and 4,4-diethoxybutan-1-amine **A70** (32.2 mg, 0.20 mmol, 1.0 equiv.) for 96 h, the reaction mixture was purified by preparative thin-layer chromatography on silica gel (EtOAc/ $\text{CH}_3\text{OH}$  = 50/1) to yield the product **70** as a colorless oil (47.6 mg, 77% yield, 91% e.e.).

**HPLC** analysis: Chiralcel IC (*n*-hexane/*i*-PrOH = 80/20, flow rate 1.0 mL/min,  $\lambda$  = 254 nm),  $t_R$  (major) = 7.28 min,  $t_R$  (minor) = 10.02 min.

**$^1\text{H}$  NMR** (400 MHz,  $\text{CDCl}_3$ )  $\delta$  9.39 (s, 1H), 7.61 – 7.57 (m, 2H), 7.35 – 7.30 (m, 2H), 7.11 – 7.07 (m, 1H), 4.49 (t,  $J$  = 5.4 Hz, 1H), 3.69 – 3.61 (m, 2H), 3.53 – 3.44 (m, 2H), 3.25 (q,  $J$  = 7.0 Hz, 1H), 2.73 (dt,  $J$  = 11.5, 6.5 Hz, 1H), 2.60 (dt,  $J$  = 11.7, 7.2 Hz, 1H), 1.76 – 1.58 (m, 5H), 1.38 (d,  $J$  = 7.0 Hz, 3H), 1.20 (td,  $J$  = 7.1, 3.3 Hz, 6H).

**$^{13}\text{C}$  NMR** (100 MHz,  $\text{CDCl}_3$ )  $\delta$  173.3, 137.8, 128.9, 123.9, 119.2, 102.6, 61.25, 61.21, 59.0, 48.5,

31.3, 25.4, 19.7, 15.3, 15.2.

**HRMS** (ESI)  $m/z$  calcd. for  $C_{17}H_{29}N_2O_3$   $[M + H]^+$  309.2173, found 309.2171.

**(S)-2-(Cyclopropylamino)-N-phenylpropanamide (71)**

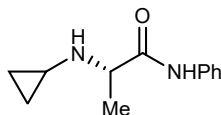

**71**

According to **General Procedure B** with 2-chloro-*N*-phenylpropanamide **E1** (54.9 mg, 0.30 mmol, 1.5 equiv.) and cyclopropanamine **A71** (11.4 mg, 0.20 mmol, 1.0 equiv.) for 96 h, the reaction mixture was purified by preparative thin-layer chromatography on silica gel (EtOAc) to yield the product **71** as a colorless oil (26.1 mg, 64% yield, 91% e.e.).

**HPLC** analysis: Chiralcel IC (*n*-hexane/*i*-PrOH = 80/20, flow rate 1.0 mL/min,  $\lambda$  = 254 nm),  $t_R$  (major) = 6.11 min,  $t_R$  (minor) = 7.10 min.

**$^1H$  NMR** (400 MHz,  $CDCl_3$ )  $\delta$  9.10 (s, 1H), 7.58 – 7.55 (m, 2H), 7.35 – 7.30 (m, 2H), 7.12 – 7.07 (m, 1H), 3.44 (q,  $J$  = 7.0 Hz, 1H), 2.30 – 2.25 (m, 1H), 1.96 (s, 1H), 1.42 (d,  $J$  = 7.0 Hz, 3H), 0.59 – 0.38 (m, 4H).

**$^{13}C$  NMR** (100 MHz,  $CDCl_3$ )  $\delta$  173.4, 137.7, 129.0, 124.0, 119.3, 59.2, 30.2, 19.4, 6.5, 6.2.

**HRMS** (ESI)  $m/z$  calcd. for  $C_{12}H_{17}N_2O$   $[M + H]^+$  205.1335, found 205.1333.

**(S)-2-(Cyclopentylamino)-N-phenylpropanamide (72)**

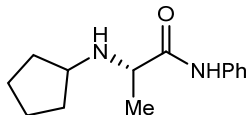

**72**

According to **General Procedure B** with 2-chloro-*N*-phenylpropanamide **E1** (54.9 mg, 0.30 mmol, 1.5 equiv.), cyclopentanamine **A72** (17.0 mg, 0.20 mmol, 1.0 equiv.), and **L\*2** (14.8 mg, 0.03 mmol, 15 mol%) for 96 h, the reaction mixture was purified by preparative thin-layer chromatography on silica gel (EtOAc) to yield the product **72** as a colorless oil (37.4 mg, 81% yield, 95% e.e.).

**HPLC** analysis: Chiralcel IG (*n*-hexane/*i*-PrOH = 95/5, flow rate 1.0 mL/min,  $\lambda$  = 254 nm),  $t_R$  (major) = 22.18 min,  $t_R$  (minor) = 26.53 min.

**$^1H$  NMR** (400 MHz,  $CDCl_3$ )  $\delta$  9.55 (s, 1H), 7.61 – 7.58 (m, 2H), 7.35 – 7.30 (m, 2H), 7.11 – 7.07 (m, 1H), 3.30 (q,  $J$  = 7.0 Hz, 1H), 3.17 – 3.11 (m, 1H), 1.95 – 1.87 (m, 1H), 1.83 – 1.64 (m, 3H), 1.63 – 1.49 (m, 2H), 1.42 – 1.29 (m, 6H).

**$^{13}C$  NMR** (100 MHz,  $CDCl_3$ )  $\delta$  173.8, 137.8, 128.9, 123.8, 119.2, 59.4, 57.7, 33.2, 33.0, 23.6, 23.5, 20.1.

**HRMS** (ESI)  $m/z$  calcd. for  $C_{14}H_{21}N_2O$   $[M + H]^+$  233.1648, found 233.1646.

**(S)-2-(Cyclohexylamino)-N-phenylpropanamide (73)**

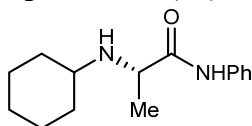

**73**

According to **General Procedure B** with 2-chloro-*N*-phenylpropanamide **E1** (54.9 mg, 0.30 mmol, 1.5 equiv.), cyclohexanamine **A73** (19.8 mg, 0.20 mmol, 1.0 equiv.), **L\*2** (14.8 mg, 0.03 mmol, 15 mol%), anhydrous NMP (2.8 mL) and EtOAc (1.2 mL) for 96 h, the reaction mixture was purified by preparative thin-layer chromatography on silica gel (EtOAc/CH<sub>3</sub>OH = 25/1) to yield the product **73** as a colorless oil (26.8 mg, 54% yield, 91% e.e.).

**HPLC** analysis: Chiralcel IC (*n*-hexane/*i*-PrOH = 90/10, flow rate 1.0 mL/min,  $\lambda$  = 254 nm),  $t_R$  (major) = 10.64 min,  $t_R$  (minor) = 14.01 min.

**<sup>1</sup>H NMR** (400 MHz, CDCl<sub>3</sub>)  $\delta$  9.62 (s, 1H), 7.61 – 7.59 (m, 2H), 7.35 – 7.31 (m, 2H), 7.11 – 7.07 (m, 1H), 3.35 (q,  $J$  = 7.0 Hz, 1H), 2.49 – 2.42 (m, 1H), 1.96 – 1.92 (m, 1H), 1.89 – 1.84 (m, 1H), 1.76 – 1.68 (m, 2H), 1.63 – 1.59 (m, 1H), 1.51 (s, 1H), 1.38 (d,  $J$  = 7.0 Hz, 3H), 1.31 – 1.24 (m, 2H), 1.17 – 1.04 (m, 3H).

**<sup>13</sup>C NMR** (100 MHz, CDCl<sub>3</sub>)  $\delta$  174.0, 137.9, 129.0, 123.8, 119.2, 56.6, 56.5, 34.3, 33.8, 25.8, 24.983, 24.979, 20.4.

**HRMS** (ESI)  $m/z$  calcd. for C<sub>15</sub>H<sub>23</sub>N<sub>2</sub>O [M + H]<sup>+</sup> 247.1805, found 247.1804.

**(*S*)-*N*-Phenyl-2-((tetrahydro-2*H*-thiopyran-4-yl)amino)propanamide (74)**

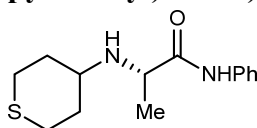

**74**

According to **General Procedure B** with 2-chloro-*N*-phenylpropanamide **E1** (54.9 mg, 0.30 mmol, 1.5 equiv.), tetrahydro-2*H*-thiopyran-4-amine hydrochloride **A74** (30.6 mg, 0.20 mmol, 1.0 equiv.), **L\*2** (14.8 mg, 0.03 mmol, 15 mol%), Cs<sub>2</sub>CO<sub>3</sub> (260.6 mg, 0.80 mmol, 4.0 equiv.), anhydrous NMP (2.8 mL), and EtOAc (1.2 mL) for 96 h, the reaction mixture was purified by preparative thin-layer chromatography on silica gel (EtOAc) to yield the product **74** as a yellowish oil (23.9 mg, 45% yield, 95% e.e.).

**HPLC** analysis: Chiralcel IF (*n*-hexane/*i*-PrOH = 90/10, flow rate 1.0 mL/min,  $\lambda$  = 254 nm),  $t_R$  (major) = 11.57 min,  $t_R$  (minor) = 15.67 min.

**<sup>1</sup>H NMR** (400 MHz, CDCl<sub>3</sub>)  $\delta$  9.44 (s, 1H), 7.60 – 7.56 (m, 2H), 7.36 – 7.31 (m, 2H), 7.12 – 7.08 (m, 1H), 3.35 (q,  $J$  = 7.0 Hz, 1H), 2.67 – 2.62 (m, 4H), 2.51 – 2.43 (m, 1H), 2.27 – 2.13 (m, 2H), 1.58 – 1.48 (m, 2H), 1.43 – 1.38 (m, 4H).

**<sup>13</sup>C NMR** (100 MHz, CDCl<sub>3</sub>)  $\delta$  173.6, 137.6, 129.0, 124.0, 119.2, 56.4, 56.0, 35.4, 34.9, 27.7, 20.4.

**HRMS** (ESI)  $m/z$  calcd. for C<sub>14</sub>H<sub>21</sub>N<sub>2</sub>OS [M + H]<sup>+</sup> 265.1369, found 265.1368.

**(*S*)-2-((1-(Methylsulfonyl)piperidin-4-yl)amino)-*N*-phenylpropanamide (75)**

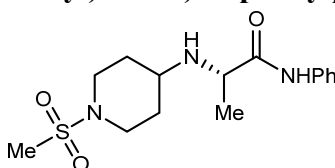

**75**

According to **General Procedure B** with 2-chloro-*N*-phenylpropanamide **E1** (54.9 mg, 0.30 mmol, 1.5 equiv.), 1-(methylsulfonyl)piperidin-4-amine **A75** (35.6 mg, 0.20 mmol, 1.0 equiv.), **L\*2** (14.8 mg, 0.03 mmol, 15 mol%), anhydrous NMP (2.8 mL), and EtOAc (1.2 mL) for 96 h,

the reaction mixture was purified by preparative thin-layer chromatography on silica gel (EtOAc/CH<sub>3</sub>OH = 20/1) to yield the product **75** as a yellowish oil (22.7 mg, 35% yield, 96% e.e.).

**HPLC** analysis: Chiralcel IE (*n*-hexane/*i*-PrOH = 70/30, flow rate 1.0 mL/min,  $\lambda$  = 254 nm),  $t_R$  (major) = 20.75 min,  $t_R$  (minor) = 23.72 min.

**<sup>1</sup>H NMR** (400 MHz, CDCl<sub>3</sub>)  $\delta$  9.30 (s, 1H), 7.59 – 7.56 (m, 2H), 7.36 – 7.31 (m, 2H), 7.13 – 7.09 (m, 1H), 3.82 – 3.72 (m, 2H), 3.37 (q,  $J$  = 7.0 Hz, 1H), 2.76 (s, 3H), 2.73 – 2.66 (m, 2H), 2.63 – 2.56 (m, 1H), 2.08 – 2.02 (m, 1H), 1.97 – 1.91 (m, 1H), 1.57 – 1.46 (m, 3H), 1.40 (d,  $J$  = 7.0 Hz, 3H).

**<sup>13</sup>C NMR** (100 MHz, CDCl<sub>3</sub>)  $\delta$  173.3, 137.5, 129.0, 124.1, 119.2, 56.6, 54.1, 44.92, 44.89, 34.8, 32.8, 32.2, 20.3.

**HRMS** (ESI)  $m/z$  calcd. for C<sub>15</sub>H<sub>24</sub>N<sub>3</sub>O<sub>3</sub>S [M + H]<sup>+</sup> 326.1533, found 326.1533.

### (*S*)-2-(Adamantan-1-ylamino)-*N*-phenylpropanamide (**76**)

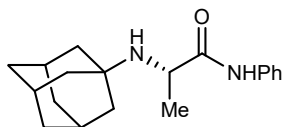

**76**

According to **General Procedure B** with 2-chloro-*N*-phenylpropanamide **E1** (54.9 mg, 0.30 mmol, 1.5 equiv.), amantadine **A76** (30.2 mg, 0.20 mmol, 1.0 equiv.), **L\*4** (15.4 mg, 0.03 mmol, 15 mol%), anhydrous NMP (2.8 mL), and EtOAc (1.2 mL) for 96 h, the reaction mixture was purified by flash column chromatography on silica gel (petroleum ether/EtOAc = 1/1) to yield the product **76** as a colorless oil (50.0 mg, 84% yield, 92% e.e.).

**HPLC** analysis: Chiralcel IC (*n*-hexane/*i*-PrOH = 90/10, flow rate 1.0 mL/min,  $\lambda$  = 254 nm),  $t_R$  (major) = 11.50 min,  $t_R$  (minor) = 16.23 min.

**<sup>1</sup>H NMR** (400 MHz, CDCl<sub>3</sub>)  $\delta$  9.85 (s, 1H), 7.61 – 7.58 (m, 2H), 7.35 – 7.30 (m, 2H), 7.11 – 7.06 (m, 1H), 3.51 (q,  $J$  = 7.1 Hz, 1H), 2.07 – 2.04 (m, 3H), 1.71 – 1.63 (m, 6H), 1.60 – 1.54 (m, 6H), 1.36 (d,  $J$  = 7.1 Hz, 3H), 1.30 (s, 1H).

**<sup>13</sup>C NMR** (100 MHz, CDCl<sub>3</sub>)  $\delta$  174.8, 137.8, 128.9, 123.8, 119.0, 51.5, 50.5, 42.9, 36.4, 29.3, 21.6.

**HRMS** (ESI)  $m/z$  calcd. for C<sub>19</sub>H<sub>27</sub>N<sub>2</sub>O [M + H]<sup>+</sup> 299.2118, found 299.2115.

### (*S*)-2-((((1*R*,4*aS*,10*aR*)-7-Isopropyl-1,4*a*-dimethyl-1,2,3,4,4*a*,9,10,10*a*-octahydrophenanthren-1-yl)methyl)amino)-*N*-phenylpropanamide (**77**)

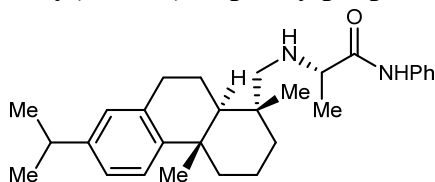

**77**

According to **General Procedure B** with 2-chloro-*N*-phenylpropanamide **E1** (54.9 mg, 0.30 mmol, 1.5 equiv.), dehydroabietylamine **A77** (57.0 mg, 0.20 mmol, 1.0 equiv.), **L\*4** (15.4 mg, 0.03 mmol, 15 mol%), anhydrous NMP (2.8 mL), and EtOAc (1.2 mL) for 96 h, the reaction mixture was purified by column chromatography on silica gel (petroleum ether/EtOAc = 3/1) to yield the product **77** as a white solid (61.6 mg, 71% yield, >20:1 d.r.). The diastereomeric ratio

was determined by crude  $^1\text{H}$  NMR spectroscopy.

**$^1\text{H}$  NMR** (400 MHz,  $\text{CDCl}_3$ )  $\delta$  9.25 (s, 1H), 7.54 – 7.50 (m, 2H), 7.34 – 7.29 (m, 2H), 7.19 – 7.17 (m, 1H), 7.11 – 7.07 (m, 1H), 7.02 – 6.99 (m, 1H), 6.88 (d,  $J$  = 2.0 Hz, 1H), 3.19 (q,  $J$  = 7.0 Hz, 1H), 2.95 – 2.78 (m, 3H), 2.54 – 2.43 (m, 2H), 2.34 – 2.29 (m, 1H), 1.88 – 1.69 (m, 5H), 1.58 – 1.53 (m, 1H), 1.46 – 1.33 (m, 5H), 1.24 (s, 3H), 1.22 (s, 6H), 0.95 (s, 3H), 0.90 – 0.79 (m, 1H).

**$^{13}\text{C}$  NMR** (100 MHz,  $\text{CDCl}_3$ )  $\delta$  173.3, 147.4, 145.7, 137.8, 134.4, 129.0, 126.8, 124.0, 123.94, 123.88, 119.2, 60.5, 59.8, 45.2, 38.5, 37.4, 36.9, 36.7, 33.4, 29.9, 25.1, 24.0, 19.7, 19.4, 18.9, 18.7.

**HRMS** (ESI)  $m/z$  calcd. for  $\text{C}_{29}\text{H}_{41}\text{N}_2\text{O}$   $[\text{M} + \text{H}]^+$  433.3213, found 433.3213.

**(S)-2-(Benzyl(methyl)amino)-N-phenylpropanamide (78)**

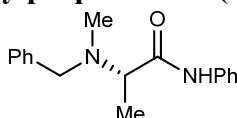

**78**

According to **General Procedure C** with 2-chloro-*N*-phenylpropanamide **E1** (54.9 mg, 0.30 mmol, 1.5 equiv.) and *N*-methyl-1-benzylamine **A78** (24.2 mg, 0.20 mmol, 1.0 equiv.) for 96 h, the reaction mixture was purified by flash column chromatography on silica gel (petroleum ether/EtOAc = 5/1) to yield the product **78** as a colorless oil (46.3 mg, 86% yield, 91% e.e.).

**HPLC** analysis: Chiralcel IC (*n*-hexane/*i*-PrOH = 80/20, flow rate 1.0 mL/min,  $\lambda$  = 254 nm),  $t_R$  (major) = 8.04 min,  $t_R$  (minor) = 10.95 min.

**$^1\text{H}$  NMR** (400 MHz,  $\text{CDCl}_3$ )  $\delta$  9.41 (s, 1H), 7.58 – 7.56 (m, 2H), 7.39 – 7.27 (m, 7H), 7.11 – 7.07 (m, 1H), 3.70 – 3.56 (m, 2H), 3.41 (q,  $J$  = 7.0 Hz, 1H), 2.28 (s, 3H), 1.34 (d,  $J$  = 7.0 Hz, 3H).

**$^{13}\text{C}$  NMR** (100 MHz,  $\text{CDCl}_3$ )  $\delta$  172.0, 138.3, 138.0, 129.0, 128.65, 128.62, 127.5, 123.9, 119.2, 62.6, 59.1, 38.0, 8.9.

**HRMS** (ESI)  $m/z$  calcd. for  $\text{C}_{17}\text{H}_{21}\text{N}_2\text{O}$   $[\text{M} + \text{H}]^+$  269.1648, found 269.1651.

**(S)-2-((2,2-Dimethoxyethyl)(methyl)amino)-N-phenylpropanamide (79)**

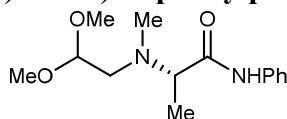

**79**

According to **General Procedure C** with 2-chloro-*N*-phenylpropanamide **E1** (54.9 mg, 0.30 mmol, 1.5 equiv.) and 2,2-dimethoxy-*N*-methylethan-1-amine **A79** (23.8 mg, 0.20 mmol, 1.0 equiv.) for 96 h, the reaction mixture was purified by flash column chromatography on silica gel (petroleum ether/EtOAc = 1/1) to yield the product **79** as a colorless oil (30.7 mg, 58% yield, 91% e.e.).

**HPLC** analysis: Chiralcel IH (*n*-hexane/*i*-PrOH = 95/5, flow rate 1.0 mL/min,  $\lambda$  = 254 nm),  $t_R$  (major) = 8.88 min,  $t_R$  (minor) = 11.57 min.

**$^1\text{H}$  NMR** (400 MHz,  $\text{CDCl}_3$ )  $\delta$  9.63 (s, 1H), 7.62 – 7.59 (m, 2H), 7.34 – 7.29 (m, 2H), 7.10 – 7.06 (m, 1H), 4.56 – 4.53 (m, 1H), 3.44 (s, 3H), 3.39 – 3.34 (m, 4H), 2.67 – 2.62 (m, 1H), 2.57 – 2.52 (m, 1H), 2.42 (s, 3H), 1.30 (d,  $J$  = 7.0 Hz, 3H).

**$^{13}\text{C}$  NMR** (100 MHz,  $\text{CDCl}_3$ )  $\delta$  171.9, 138.3, 128.8, 123.7, 119.3, 102.6, 64.2, 55.4, 54.2, 53.6, 40.1, 9.4.



**HRMS** (ESI)  $m/z$  calcd. for  $C_{14}H_{23}N_2O_3$   $[M + H]^+$  267.1703, found 267.1707.

**(S)-2-((2-Cyanoethyl)(methyl)amino)-N-phenylpropanamide (80)**

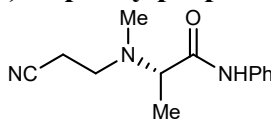

**80**

According to **General Procedure C** with 2-chloro-*N*-phenylpropanamide **E1** (54.9 mg, 0.30 mmol, 1.5 equiv.) and 3-(methylamino)propanenitrile **A80** (16.8 mg, 0.20 mmol, 1.0 equiv.) for 96 h, the reaction mixture was purified by flash column chromatography on silica gel (petroleum ether/EtOAc = 2/1) to yield the product **80** as a colorless oil (23.6 mg, 51% yield, 93% e.e.).

**HPLC** analysis: Chiralcel IC (*n*-hexane/*i*-PrOH = 70/30, flow rate 1.0 mL/min,  $\lambda$  = 254 nm),  $t_R$  (major) = 22.25 min,  $t_R$  (minor) = 29.37 min.

**$^1H$  NMR** (400 MHz,  $CDCl_3$ )  $\delta$  9.26 (s, 1H), 7.69 – 7.65 (m, 2H), 7.34 – 7.30 (m, 2H), 7.11 – 7.06 (m, 1H), 3.41 (q,  $J$  = 7.0 Hz, 1H), 2.83 – 2.73 (m, 2H), 2.61 (t,  $J$  = 6.4 Hz, 2H), 2.36 (s, 3H), 1.32 (d,  $J$  = 7.0 Hz, 3H).

**$^{13}C$  NMR** (100 MHz,  $CDCl_3$ )  $\delta$  171.0, 137.9, 128.9, 123.9, 119.3, 118.5, 63.8, 49.5, 37.4, 17.4, 9.4.

**HRMS** (ESI)  $m/z$  calcd. for  $C_{13}H_{18}N_3O$   $[M + H]^+$  232.1444, found 232.1445.

**(S)-2-((2-Methoxyethyl)(methyl)amino)-N-phenylpropanamide (81)**

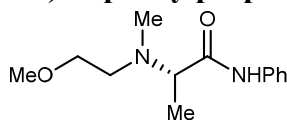

**81**

According to **General Procedure C** with 2-chloro-*N*-phenylpropanamide **E1** (54.9 mg, 0.30 mmol, 1.5 equiv.) and 2-methoxy-*N*-methylethan-1-amine **A81** (17.8 mg, 0.20 mmol, 1.0 equiv.) for 96 h, the reaction mixture was purified by flash column chromatography on silica gel (petroleum ether/EtOAc = 1/1) to yield the product **81** as a colorless oil (24.6 mg, 52% yield, 90% e.e.).

**HPLC** analysis: Chiralcel IC (*n*-hexane/*i*-PrOH = 70/30, flow rate 1.0 mL/min,  $\lambda$  = 254 nm),  $t_R$  (major) = 8.55 min,  $t_R$  (minor) = 9.38 min.

**$^1H$  NMR** (400 MHz,  $CDCl_3$ )  $\delta$  9.69 (s, 1H), 7.63 – 7.61 (m, 2H), 7.33 – 7.29 (m, 2H), 7.09 – 7.05 (m, 1H), 3.58 – 3.52 (m, 1H), 3.49 – 3.45 (m, 1H), 3.41 (s, 3H), 3.37 (q,  $J$  = 7.0 Hz, 1H), 2.74 – 2.68 (m, 1H), 2.57 – 2.51 (m, 1H), 2.40 (s, 3H), 1.31 (d,  $J$  = 7.0 Hz, 3H).

**$^{13}C$  NMR** (100 MHz,  $CDCl_3$ )  $\delta$  172.0, 138.4, 128.8, 123.6, 119.2, 69.8, 63.9, 58.9, 53.2, 39.0, 9.6.

**HRMS** (ESI)  $m/z$  calcd. for  $C_{13}H_{21}N_2O_2$   $[M + H]^+$  237.1598, found 237.1598.

***tert*-Butyl (S)-methyl(2-(methyl(1-oxo-1-(phenylamino)propan-2-yl)amino)ethyl)carbamate (82)**

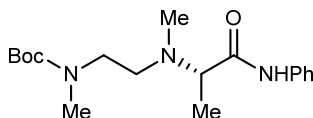

**82**

According to **General Procedure C** with 2-chloro-*N*-phenylpropanamide **E1** (54.9 mg, 0.30 mmol, 1.5 equiv.) and *tert*-butyl methyl(2-(methylamino)ethyl)carbamate **A82** (37.6 mg, 0.20 mmol, 1.0 equiv.) for 96 h, the reaction mixture was purified by flash column chromatography on silica gel (petroleum ether/EtOAc = 1/1) to yield the product **82** as a colorless oil (36.9 mg, 55% yield, 91% e.e.).

**HPLC** analysis: Chiralcel ID (*n*-hexane/*i*-PrOH = 80/20, flow rate 1.0 mL/min,  $\lambda$  = 254 nm),  $t_R$  (minor) = 9.36 min,  $t_R$  (major) = 11.74 min.

**<sup>1</sup>H NMR** (400 MHz, CDCl<sub>3</sub>)  $\delta$  9.27 (d,  $J$  = 93.2 Hz, 1H), 7.63 – 7.61 (m, 2H), 7.33 – 7.29 (m, 2H), 7.10 – 7.05 (m, 1H), 3.45 – 3.32 (m, 3H), 2.87 (s, 3H), 2.66 – 2.53 (m, 2H), 2.36 (s, 3H), 1.43 (s, 9H), 1.29 (d,  $J$  = 6.9 Hz, 3H).

**<sup>13</sup>C NMR** (100 MHz, CDCl<sub>3</sub>)  $\delta$  172.0, 156.0, 138.0, 128.8, 123.8, 119.2, 79.7, 64.0, 52.0, 46.7, 38.4, 34.4, 28.3, 9.2.

**HRMS** (ESI)  $m/z$  calcd. for C<sub>18</sub>H<sub>30</sub>N<sub>3</sub>O<sub>3</sub> [M + H]<sup>+</sup> 336.2282, found 336.2285.

**(S)-2-(2,5-Dihydro-1H-pyrrol-1-yl)-*N*-phenylpropanamide (83)**

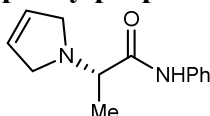

**83**

According to **General Procedure C** with 2-chloro-*N*-phenylpropanamide **E1** (54.9 mg, 0.30 mmol, 1.5 equiv.) and 2,5-dihydro-1H-pyrrole **A83** (13.8 mg, 0.20 mmol, 1.0 equiv.) for 96 h, the reaction mixture was purified by flash column chromatography on silica gel (petroleum ether/EtOAc = 1/1) to yield the product **83** as a colorless oil (33.7 mg, 78% yield, 93% e.e.).

**HPLC** analysis: Chiralcel IH (*n*-hexane/*i*-PrOH = 90/10, flow rate 0.8 mL/min,  $\lambda$  = 254 nm),  $t_R$  (major) = 8.69 min,  $t_R$  (minor) = 10.00 min.

**<sup>1</sup>H NMR** (400 MHz, CDCl<sub>3</sub>)  $\delta$  8.95 (s, 1H), 7.60 – 7.58 (m, 2H), 7.34 – 7.30 (m, 2H), 7.12 – 7.07 (m, 1H), 5.83 (s, 2H), 3.72 – 3.64 (m, 2H), 3.58 – 3.51 (m, 2H), 3.36 (q,  $J$  = 6.9 Hz, 1H), 1.42 (d,  $J$  = 6.9 Hz, 3H).

**<sup>13</sup>C NMR** (100 MHz, CDCl<sub>3</sub>)  $\delta$  171.9, 137.9, 128.9, 127.1, 124.1, 119.5, 63.8, 57.1, 16.1.

**HRMS** (ESI)  $m/z$  calcd. for C<sub>13</sub>H<sub>17</sub>N<sub>2</sub>O [M + H]<sup>+</sup> 217.1335, found 217.1339.

**(S)-2-(Isoindolin-2-yl)-*N*-phenylpropanamide (84)**

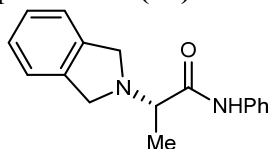

**84**

According to **General Procedure C** with 2-chloro-*N*-phenylpropanamide **E1** (54.9 mg, 0.30 mmol, 1.5 equiv.), isoindoline hydrochloride **A84** (31.0 mg, 0.20 mmol, 1.0 equiv.), and Cs<sub>2</sub>CO<sub>3</sub> (260.6 mg, 0.80 mmol, 4.0 equiv.) for 96 h, the reaction mixture was purified by flash column

chromatography on silica gel (petroleum ether/EtOAc = 5/1) to yield the product **84** as a colorless oil (41.0 mg, 77% yield, 96% e.e.).

**HPLC** analysis: Chiralcel IH (*n*-hexane/*i*-PrOH = 95/5, flow rate 1.0 mL/min,  $\lambda$  = 254 nm),  $t_R$  (major) = 11.64 min,  $t_R$  (minor) = 16.52 min.

**$^1\text{H}$  NMR** (400 MHz,  $\text{CDCl}_3$ )  $\delta$  8.94 (s, 1H), 7.60 – 7.56 (m, 2H), 7.34 – 7.29 (m, 2H), 7.27 – 7.22 (m, 4H), 7.12 – 7.07 (m, 1H), 4.15 – 4.10 (m, 2H), 4.03 – 3.99 (m, 2H), 3.43 (q,  $J$  = 6.9 Hz, 1H), 1.50 (d,  $J$  = 6.9 Hz, 3H).

**$^{13}\text{C}$  NMR** (100 MHz,  $\text{CDCl}_3$ )  $\delta$  172.3, 139.2, 137.9, 129.0, 127.1, 124.0, 122.4, 119.4, 64.1, 56.4, 16.5.

**HRMS** (ESI)  $m/z$  calcd. for  $\text{C}_{17}\text{H}_{19}\text{N}_2\text{O}$  [ $\text{M} + \text{H}$ ] $^+$  267.1492, found 267.1494.

### (*S*)-2-(3,4-Dihydroisoquinolin-2(1*H*)-yl)-*N*-phenylpropanamide (**85**)

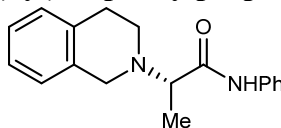

**85**

According to **General Procedure C** with 2-chloro-*N*-phenylpropanamide **E1** (54.9 mg, 0.30 mmol, 1.5 equiv.) and 1,2,3,4-tetrahydroisoquinoline **A85** (26.6 mg, 0.20 mmol, 1.0 equiv.) for 96 h, the reaction mixture was purified by flash column chromatography on silica gel (petroleum ether/EtOAc = 2/1) to yield the product **85** as a colorless oil (43.9 mg, 78% yield, 90% e.e.).

**HPLC** analysis: Chiralcel IH (*n*-hexane/*i*-PrOH = 90/10, flow rate 0.8 mL/min,  $\lambda$  = 254 nm),  $t_R$  (major) = 9.54 min,  $t_R$  (minor) = 11.22 min.

**$^1\text{H}$  NMR** (400 MHz,  $\text{CDCl}_3$ )  $\delta$  9.34 (s, 1H), 7.56 – 7.53 (m, 2H), 7.33 – 7.28 (m, 2H), 7.21 – 7.14 (m, 3H), 7.10 – 7.05 (m, 2H), 3.94 – 3.90 (m, 1H), 3.78 – 3.75 (m, 1H), 3.42 (q,  $J$  = 7.0 Hz, 1H), 2.98 – 2.95 (m, 2H), 2.89 – 2.77 (m, 2H), 1.42 (d,  $J$  = 7.0 Hz, 3H).

**$^{13}\text{C}$  NMR** (100 MHz,  $\text{CDCl}_3$ )  $\delta$  171.9, 137.8, 134.3, 133.8, 128.9, 128.8, 126.6, 126.4, 125.9, 123.9, 119.3, 64.2, 52.6, 47.6, 29.7, 11.1.

**HRMS** (ESI)  $m/z$  calcd. for  $\text{C}_{18}\text{H}_{21}\text{N}_2\text{O}$  [ $\text{M} + \text{H}$ ] $^+$  281.1648, found 281.1652.

### (*S*)-2-(4-Methoxypiperidin-1-yl)-*N*-phenylpropanamide (**86**)

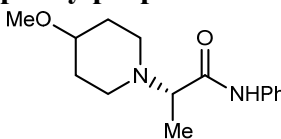

**86**

According to **General Procedure C** with 2-chloro-*N*-phenylpropanamide **E1** (54.9 mg, 0.30 mmol, 1.5 equiv.) and 4-methoxypiperidine **A86** (23.0 mg, 0.20 mmol, 1.0 equiv.) for 96 h, the reaction mixture was purified by flash column chromatography on silica gel (petroleum ether/EtOAc = 1/2) to yield the product **86** as a colorless oil (48.0 mg, 92% yield, 94% e.e.).

**HPLC** analysis: Chiralcel IG (*n*-hexane/*i*-PrOH = 85/15, flow rate 0.8 mL/min,  $\lambda$  = 254 nm),  $t_R$  (minor) = 19.52 min,  $t_R$  (major) = 21.49 min.

**$^1\text{H}$  NMR** (400 MHz,  $\text{CDCl}_3$ )  $\delta$  9.41 (s, 1H), 7.58 – 7.55 (m, 2H), 7.34 – 7.30 (m, 2H), 7.11 – 7.07 (m, 1H), 3.36 (s, 3H), 3.30 – 3.23 (m, 2H), 2.84 – 2.76 (m, 2H), 2.51 – 2.45 (m, 1H), 2.36 – 2.31 (m, 1H), 2.04 – 1.96 (m, 2H), 1.73 – 1.58 (m, 2H), 1.31 (d,  $J$  = 7.0 Hz, 3H).

$^{13}\text{C}$  NMR (100 MHz,  $\text{CDCl}_3$ )  $\delta$  171.8, 137.9, 129.0, 123.9, 119.1, 75.6, 64.4, 55.6, 48.6, 46.3, 31.4, 31.3, 10.9.

HRMS (ESI)  $m/z$  calcd. for  $\text{C}_{15}\text{H}_{23}\text{N}_2\text{O}_2$   $[\text{M} + \text{H}]^+$  263.1754, found 263.1757.

**(S)-2-(4-Hydroxypiperidin-1-yl)-N-phenylpropanamide (87)**

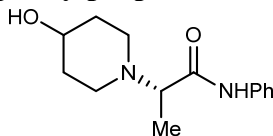

**87**

According to **General Procedure C** with 2-chloro-*N*-phenylpropanamide **E1** (54.9 mg, 0.30 mmol, 1.5 equiv.) and piperidin-4-ol **A87** (20.2 mg, 0.20 mmol, 1.0 equiv.) for 96 h, the reaction mixture was purified by preparative thin-layer chromatography on silica gel (EtOAc) to yield the product **87** as a colorless oil (28.4 mg, 57% yield, 92% e.e.).

HPLC analysis: Chiralcel IG (*n*-hexane/*i*-PrOH = 90/10, flow rate 0.8 mL/min,  $\lambda$  = 254 nm),  $t_R$  (minor) = 33.62 min,  $t_R$  (major) = 38.13 min.

$^1\text{H}$  NMR (400 MHz,  $\text{CDCl}_3$ )  $\delta$  9.40 (s, 1H), 7.58 – 7.55 (m, 2H), 7.35 – 7.30 (m, 2H), 7.12 – 7.08 (m, 1H), 3.81 – 3.73 (m, 1H), 3.27 (q,  $J$  = 7.0 Hz, 1H), 2.86 – 2.79 (m, 2H), 2.54 – 2.48 (m, 1H), 2.38 – 2.32 (m, 1H), 2.04 – 1.94 (m, 3H), 1.74 – 1.57 (m, 2H), 1.31 (d,  $J$  = 7.1 Hz, 3H).

$^{13}\text{C}$  NMR (100 MHz,  $\text{CDCl}_3$ )  $\delta$  171.8, 137.8, 129.0, 124.0, 119.2, 67.2, 64.4, 48.8, 46.1, 34.9, 34.7, 10.9.

HRMS (ESI)  $m/z$  calcd. for  $\text{C}_{14}\text{H}_{21}\text{N}_2\text{O}_2$   $[\text{M} + \text{H}]^+$  249.1598, found 249.1601.

**(S)-N-Phenyl-2-(1,4-dioxo-8-azaspiro[4.5]decan-8-yl)propanamide (88)**

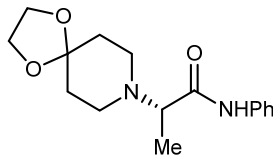

**88**

According to **General Procedure C** with 2-chloro-*N*-phenylpropanamide **E1** (54.9 mg, 0.30 mmol, 1.5 equiv.) and 1,4-dioxo-8-azaspiro[4.5]decan-8-yl **A88** (28.6 mg, 0.20 mmol, 1.0 equiv.) for 96 h, the reaction mixture was purified by flash column chromatography on silica gel (petroleum ether/EtOAc = 1/1) to yield the product **88** as a colorless oil (52.6 mg, 91% yield, 93% e.e.).

HPLC analysis: Chiralcel IH (*n*-hexane/*i*-PrOH = 95/5, flow rate 1.0 mL/min,  $\lambda$  = 254 nm),  $t_R$  (major) = 14.76 min,  $t_R$  (minor) = 23.33 min.

$^1\text{H}$  NMR (400 MHz,  $\text{CDCl}_3$ )  $\delta$  9.38 (s, 1H), 7.58 – 7.54 (m, 2H), 7.35 – 7.30 (m, 2H), 7.11 – 7.07 (m, 1H), 3.97 (s, 4H), 3.28 (q,  $J$  = 7.0 Hz, 1H), 2.75 – 2.60 (m, 4H), 1.87 – 1.75 (m, 4H), 1.31 (d,  $J$  = 7.1 Hz, 3H).

$^{13}\text{C}$  NMR (100 MHz,  $\text{CDCl}_3$ )  $\delta$  171.9, 137.9, 129.0, 123.8, 119.1, 106.5, 64.3, 64.1, 47.9, 35.4, 10.8.

HRMS (ESI)  $m/z$  calcd. for  $\text{C}_{16}\text{H}_{23}\text{N}_2\text{O}_3$   $[\text{M} + \text{H}]^+$  291.1703, found 291.1706.

**(S)-2-Morpholino-N-phenylpropanamide (89)**

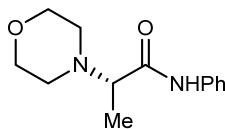

**89**

According to **General Procedure C** with 2-chloro-*N*-phenylpropanamide **E1** (54.9 mg, 0.30 mmol, 1.5 equiv.) and morpholine **A89** (17.4 mg, 0.20 mmol, 1.0 equiv.) for 96 h, the reaction mixture was purified by flash column chromatography on silica gel (petroleum ether/EtOAc = 1/2) to yield the product **89** as a colorless oil (46.3 mg, 99% yield, 93% e.e.).

**HPLC** analysis: Chiralcel IC (*n*-hexane/*i*-PrOH = 80/20, flow rate 1.0 mL/min,  $\lambda$  = 254 nm),  $t_R$  (major) = 13.55 min,  $t_R$  (minor) = 16.13 min.

**<sup>1</sup>H NMR** (400 MHz, CDCl<sub>3</sub>)  $\delta$  9.18 (s, 1H), 7.57 – 7.54 (m, 2H), 7.35 – 7.31 (m, 2H), 7.13 – 7.08 (m, 1H), 3.83 – 3.74 (m, 4H), 3.17 (q,  $J$  = 7.1 Hz, 1H), 2.67 – 2.54 (m, 4H), 1.33 (d,  $J$  = 7.0 Hz, 3H).

**<sup>13</sup>C NMR** (100 MHz, CDCl<sub>3</sub>)  $\delta$  171.5, 137.7, 129.0, 124.1, 119.2, 67.2, 65.0, 50.3, 11.7.

**HRMS** (ESI)  $m/z$  calcd. for C<sub>13</sub>H<sub>19</sub>N<sub>2</sub>O<sub>2</sub> [M + H]<sup>+</sup> 235.1441, found 235.1444.

#### (*S*)-*N*-Phenyl-2-thiomorpholinopropanamide (**90**)

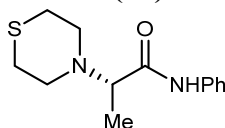

**90**

According to **General Procedure C** with 2-chloro-*N*-phenylpropanamide **E1** (54.9 mg, 0.30 mmol, 1.5 equiv.) and thiomorpholine **A90** (20.6 mg, 0.20 mmol, 1.0 equiv.) for 96 h, the reaction mixture was purified by flash column chromatography on silica gel (petroleum ether/EtOAc = 1/2) to yield the product **90** as a colorless oil (33.1 mg, 66% yield, 92% e.e.).

**HPLC** analysis: Chiralcel IC (*n*-hexane/*i*-PrOH = 80/20, flow rate 0.8 mL/min,  $\lambda$  = 254 nm),  $t_R$  (major) = 15.23 min,  $t_R$  (minor) = 16.54 min.

**<sup>1</sup>H NMR** (400 MHz, CDCl<sub>3</sub>)  $\delta$  9.23 (s, 1H), 7.57 – 7.54 (m, 2H), 7.36 – 7.31 (m, 2H), 7.12 – 7.08 (m, 1H), 3.28 (q,  $J$  = 7.0 Hz, 1H), 2.93 – 2.88 (m, 2H), 2.84 – 2.69 (m, 6H), 1.30 (d,  $J$  = 7.0 Hz, 3H).

**<sup>13</sup>C NMR** (100 MHz, CDCl<sub>3</sub>)  $\delta$  171.2, 137.7, 129.0, 124.0, 119.1, 65.5, 51.9, 28.6, 9.5.

**HRMS** (ESI)  $m/z$  calcd. for C<sub>13</sub>H<sub>19</sub>N<sub>2</sub>OS [M + H]<sup>+</sup> 251.1213, found 251.1217

#### (*S*)-2-(4-Methylpiperazin-1-yl)-*N*-phenylpropanamide (**91**)

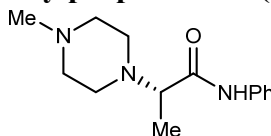

**91**

According to **General Procedure C** with 2-chloro-*N*-phenylpropanamide **E1** (54.9 mg, 0.30 mmol, 1.5 equiv.) and 1-methylpiperazine **A91** (20.0 mg, 0.20 mmol, 1.0 equiv.) for 96 h, the reaction mixture was purified by preparative thin-layer chromatography on silica gel (EtOAc/CH<sub>3</sub>OH = 20/1) to yield the product **91** as a colorless oil (48.0 mg, 97% yield, 95% e.e.).

**HPLC** analysis: Chiralcel OD3 (*n*-hexane/*i*-PrOH = 90/10, flow rate 0.8 mL/min,  $\lambda$  = 254 nm),  $t_R$  (minor) = 7.93 min,  $t_R$  (major) = 9.13 min.

**$^1\text{H}$  NMR** (400 MHz,  $\text{CDCl}_3$ )  $\delta$  9.24 (s, 1H), 7.59 – 7.56 (m, 2H), 7.35 – 7.31 (m, 2H), 7.12 – 7.08 (m, 1H), 3.24 (q,  $J$  = 7.0 Hz, 1H), 2.78 – 2.57 (m, 8H), 2.41 (s, 3H), 1.32 (d,  $J$  = 7.0 Hz, 3H).

**$^{13}\text{C}$  NMR** (100 MHz,  $\text{CDCl}_3$ )  $\delta$  171.5, 137.8, 128.9, 124.0, 119.2, 64.2, 55.2, 49.1, 45.4, 11.5.

**HRMS** (ESI)  $m/z$  calcd. for  $\text{C}_{14}\text{H}_{22}\text{N}_3\text{O}$   $[\text{M} + \text{H}]^+$  248.1757, found 248.1761.

**(*S*)-2-(4-Methyl-3-oxopiperazin-1-yl)-*N*-phenylpropanamide (92)**

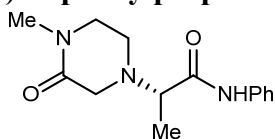

**92**

According to **General Procedure C** with 2-chloro-*N*-phenylpropanamide **E1** (54.9 mg, 0.30 mmol, 1.5 equiv.) and 1-methylpiperazin-2-one **A92** (22.8 mg, 0.20 mmol, 1.0 equiv.) for 96 h, the reaction mixture was purified by preparative thin-layer chromatography on silica gel (EtOAc/ $\text{CH}_3\text{OH}$  = 20/1) to yield the product **92** as a colorless oil (28.2 mg, 54% yield, 90% e.e.).

**HPLC** analysis: Chiralcel AD3 (*n*-hexane/*i*-PrOH = 60/40, flow rate 1.0 mL/min,  $\lambda$  = 254 nm),  $t_R$  (minor) = 8.89 min,  $t_R$  (major) = 9.49 min.

**$^1\text{H}$  NMR** (400 MHz,  $\text{CDCl}_3$ )  $\delta$  8.88 (s, 1H), 7.56 – 7.54 (m, 2H), 7.35 – 7.31 (m, 2H), 7.14 – 7.09 (m, 1H), 3.47 – 3.32 (m, 3H), 3.28 – 3.23 (m, 2H), 3.00 (s, 3H), 2.85 – 2.75 (m, 2H), 1.35 (d,  $J$  = 7.0 Hz, 3H).

**$^{13}\text{C}$  NMR** (100 MHz,  $\text{CDCl}_3$ )  $\delta$  170.7, 166.4, 137.5, 129.0, 124.3, 119.4, 63.7, 54.1, 48.7, 46.8, 33.8, 11.6.

**HRMS** (ESI)  $m/z$  calcd. for  $\text{C}_{14}\text{H}_{20}\text{N}_3\text{O}_2$   $[\text{M} + \text{H}]^+$  262.1550, found 262.1550.

***tert*-Butyl (*S*)-4-(1-oxo-1-(phenylamino)propan-2-yl)piperazine-1-carboxylate (93)**

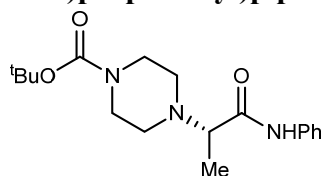

**93**

According to **General Procedure C** with 2-chloro-*N*-phenylpropanamide **E1** (54.9 mg, 0.30 mmol, 1.5 equiv.) and *tert*-butyl piperazine-1-carboxylate **A93** (37.2 mg, 0.20 mmol, 1.0 equiv.) for 96 h, the reaction mixture was purified by preparative thin-layer chromatography on silica gel (petroleum ether/EtOAc = 1/2) to yield the product **93** as a colorless oil (54.7 mg, 82% yield, 92% e.e.).

**HPLC** analysis: Chiralcel IC (*n*-hexane/*i*-PrOH = 60/40, flow rate 1.0 mL/min,  $\lambda$  = 254 nm),  $t_R$  (major) = 8.89 min,  $t_R$  (minor) = 28.83 min.

**$^1\text{H}$  NMR** (400 MHz,  $\text{CDCl}_3$ )  $\delta$  9.20 (s, 1H), 7.57 – 7.54 (m, 2H), 7.35 – 7.30 (m, 2H), 7.12 – 7.08 (m, 1H), 3.57 – 3.45 (m, 4H), 3.24 (q,  $J$  = 7.0 Hz, 1H), 2.62 – 2.57 (m, 2H), 2.54 – 2.48 (m, 2H), 1.47 (s, 9H), 1.31 (d,  $J$  = 7.1 Hz, 3H).

**$^{13}\text{C}$  NMR** (100 MHz,  $\text{CDCl}_3$ )  $\delta$  171.4, 154.6, 137.7, 129.0, 124.0, 119.2, 79.9, 64.6, 49.6, 44.0, 28.3, 11.2.

**HRMS** (ESI)  $m/z$  calcd. for  $\text{C}_{18}\text{H}_{28}\text{N}_3\text{O}_3$   $[\text{M} + \text{H}]^+$  334.2125, found 334.2125.

**(S)-2-(4-Formylpiperazin-1-yl)-N-phenylpropanamide (94)**

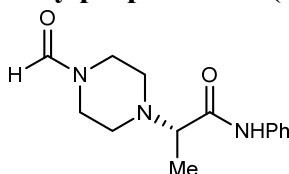

**94**

According to **General Procedure C** with 2-chloro-*N*-phenylpropanamide **E1** (54.9 mg, 0.30 mmol, 1.5 equiv.) and piperazine-1-carbaldehyde **A94** (22.8 mg, 0.20 mmol, 1.0 equiv.) for 96 h, the reaction mixture was purified by preparative thin-layer chromatography on silica gel (petroleum ether/EtOAc = 1/2) to yield the product **94** as a colorless oil (29.8 mg, 57% yield, 93% e.e.).

**HPLC** analysis: Chiralcel IC (*n*-hexane/*i*-PrOH = 40/60, flow rate 1.0 mL/min,  $\lambda$  = 254 nm),  $t_R$  (major) = 18.21 min,  $t_R$  (minor) = 29.07 min.

**$^1\text{H}$  NMR** (400 MHz,  $\text{CDCl}_3$ )  $\delta$  9.06 (s, 1H), 8.06 (s, 1H), 7.57 – 7.55 (m, 2H), 7.36 – 7.32 (m, 2H), 7.14 – 7.10 (m, 1H), 3.70 – 3.60 (m, 2H), 3.53 – 3.42 (m, 2H), 3.29 (q,  $J$  = 7.0 Hz, 1H), 2.69 – 2.52 (m, 4H), 1.33 (d,  $J$  = 7.0 Hz, 3H).

**$^{13}\text{C}$  NMR** (100 MHz,  $\text{CDCl}_3$ )  $\delta$  170.9, 160.7, 137.6, 129.1, 124.3, 119.3, 64.7, 50.3, 49.2, 45.8, 40.2, 11.1.

**HRMS** (ESI)  $m/z$  calcd. for  $\text{C}_{14}\text{H}_{20}\text{N}_3\text{O}_2$  [ $\text{M} + \text{H}$ ] $^+$  262.1550, found 262.1553.

**(S)-2-(4-(Methylsulfonyl)piperazin-1-yl)-N-phenylpropanamide (95)**

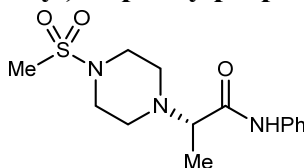

**95**

According to **General Procedure C** with 2-chloro-*N*-phenylpropanamide **E1** (54.9 mg, 0.30 mmol, 1.5 equiv.) and 1-(methylsulfonyl)piperazine **A95** (32.8 mg, 0.20 mmol, 1.0 equiv.) for 96 h, the reaction mixture was purified by preparative thin-layer chromatography on silica gel (EtOAc/ $\text{CH}_3\text{OH}$  = 25/1) to yield the product **95** as a colorless oil (46.7 mg, 75% yield, 93% e.e.).

**HPLC** analysis: Chiralcel IC (*n*-hexane/*i*-PrOH = 50/50, flow rate 1.0 mL/min,  $\lambda$  = 254 nm),  $t_R$  (major) = 20.94 min,  $t_R$  (minor) = 44.43 min.

**$^1\text{H}$  NMR** (400 MHz,  $\text{CDCl}_3$ )  $\delta$  8.98 (s, 1H), 7.56 – 7.53 (m, 2H), 7.36 – 7.31 (m, 2H), 7.13 – 7.09 (m, 1H), 3.37 – 3.26 (m, 5H), 2.83 (s, 3H), 2.77 – 2.72 (m, 2H), 2.69 – 2.64 (m, 2H), 1.33 (d,  $J$  = 7.0 Hz, 3H).

**$^{13}\text{C}$  NMR** (100 MHz,  $\text{CDCl}_3$ )  $\delta$  170.9, 137.5, 129.0, 124.2, 119.3, 64.4, 49.2, 46.0, 34.9, 11.2.

**HRMS** (ESI)  $m/z$  calcd. for  $\text{C}_{14}\text{H}_{22}\text{N}_3\text{O}_3\text{S}$  [ $\text{M} + \text{H}$ ] $^+$  312.1376, found 312.1375.

**(S)-2-(Azocan-1-yl)-N-phenylpropanamide (96)**

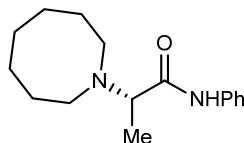

**96**

According to **General Procedure C** with 2-chloro-*N*-phenylpropanamide **E1** (54.9 mg, 0.30 mmol, 1.5 equiv.) and azocane **A96** (22.6 mg, 0.20 mmol, 1.0 equiv.) for 96 h, the reaction mixture was purified by flash column chromatography on silica gel (petroleum ether/EtOAc = 1/1) to yield the product **96** as a colorless oil (37.0 mg, 71% yield, 94% e.e.).

**HPLC** analysis: Chiralcel IC (*n*-hexane/*i*-PrOH = 80/20, flow rate 1.0 mL/min,  $\lambda$  = 254 nm),  $t_R$  (major) = 8.72 min,  $t_R$  (minor) = 11.96 min.

**<sup>1</sup>H NMR** (400 MHz, CDCl<sub>3</sub>)  $\delta$  9.46 (s, 1H), 7.60 – 7.58 (m, 2H), 7.35 – 7.31 (m, 2H), 7.10 – 7.07 (m, 1H), 3.40 (q,  $J$  = 7.0 Hz, 1H), 2.65 – 2.62 (m, 4H), 1.78 – 1.61 (m, 10H), 1.30 (d,  $J$  = 6.9 Hz, 3H).

**<sup>13</sup>C NMR** (100 MHz, CDCl<sub>3</sub>)  $\delta$  172.5, 138.1, 129.0, 123.7, 118.8, 65.5, 51.3, 28.0, 27.9, 25.7, 9.7.

**HRMS** (ESI)  $m/z$  calcd. for C<sub>16</sub>H<sub>25</sub>N<sub>2</sub>O [M + H]<sup>+</sup> 261.1961, found 261.1962.

**(S)-2-(Azonan-1-yl)-*N*-phenylpropanamide (97)**

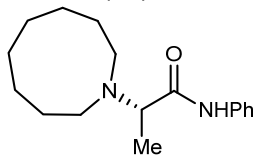

**97**

According to **General Procedure C** with 2-chloro-*N*-phenylpropanamide **E1** (54.9 mg, 0.30 mmol, 1.5 equiv.) and azonane **A97** (25.4 mg, 0.20 mmol, 1.0 equiv.) for 96 h, the reaction mixture was purified by flash column chromatography on silica gel (petroleum ether/EtOAc = 1/1) to yield the product **97** as a colorless oil (31.0 mg, 57% yield, 95% e.e.).

**HPLC** analysis: Chiralcel IC (*n*-hexane/*i*-PrOH = 80/20, flow rate 1.0 mL/min,  $\lambda$  = 254 nm),  $t_R$  (major) = 7.75 min,  $t_R$  (minor) = 10.23 min.

**<sup>1</sup>H NMR** (400 MHz, CDCl<sub>3</sub>)  $\delta$  9.40 (s, 1H), 7.60 – 7.58 (m, 2H), 7.35 – 7.31 (m, 2H), 7.11 – 7.06 (m, 1H), 3.39 (q,  $J$  = 6.9 Hz, 1H), 2.62 – 2.52 (m, 4H), 1.73 – 1.47 (m, 12H), 1.31 (d,  $J$  = 7.0 Hz, 3H).

**<sup>13</sup>C NMR** (100 MHz, CDCl<sub>3</sub>)  $\delta$  172.6, 138.1, 129.0, 123.7, 118.7, 63.7, 49.4, 26.1, 25.3, 22.6, 9.1.

**HRMS** (ESI)  $m/z$  calcd. for C<sub>17</sub>H<sub>27</sub>N<sub>2</sub>O [M + H]<sup>+</sup> 275.2118, found 275.2123.

**(S)-2-(4-(Dibenzo[*b,f*][1,4]thiazepin-11-yl)piperazin-1-yl)-*N*-phenylpropanamide (98)**



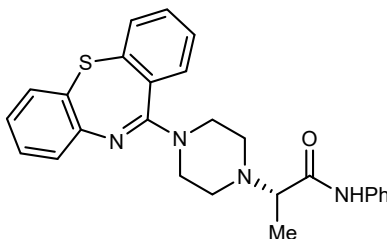

**98**

According to **General Procedure C** with 2-chloro-*N*-phenylpropanamide **E1** (54.9 mg, 0.30 mmol, 1.5 equiv.), 11-(piperazin-1-yl)dibenzo[*b,f*][1,4]thiazepine dihydrochloride **A98** (73.4 mg, 0.20 mmol, 1.0 equiv.), and Cs<sub>2</sub>CO<sub>3</sub> (325.8 mg, 1.00 mmol, 5.0 equiv.) for 96 h, the reaction mixture was purified by preparative thin-layer chromatography on silica gel (petroleum ether/EtOAc = 1/2) to yield the product **98** as a white solid (75.2 mg, 85% yield, 93% e.e.).

**HPLC** analysis: Chiralcel IG (*n*-hexane/*i*-PrOH = 80/20, flow rate 1.0 mL/min,  $\lambda$  = 254 nm), *t*<sub>R</sub> (minor) = 15.86 min, *t*<sub>R</sub> (major) = 18.63 min.

**<sup>1</sup>H NMR** (400 MHz, CDCl<sub>3</sub>)  $\delta$  9.26 (s, 1H), 7.57 – 7.50 (m, 3H), 7.41 – 7.39 (m, 1H), 7.35 – 7.27 (m, 5H), 7.20 – 7.16 (m, 1H), 7.10 – 7.06 (m, 2H), 6.92 – 6.88 (m, 1H), 3.69 – 3.42 (m, 4H), 3.26 (q, *J* = 7.0 Hz, 1H), 2.75 – 2.56 (m, 4H), 1.34 (dd, *J* = 7.0, 3.0 Hz, 3H).

**<sup>13</sup>C NMR** (100 MHz, CDCl<sub>3</sub>)  $\delta$  171.5, 171.4, 160.9, 148.5, 139.9, 137.7, 133.89, 133.87, 132.1, 130.9, 129.1, 129.0, 128.90, 128.88, 128.3, 127.9, 125.3, 124.0, 123.1, 119.19, 119.18, 64.52, 64.49, 49.6, 47.1, 11.3, 11.2.

**HRMS** (ESI) *m/z* calcd. for C<sub>26</sub>H<sub>27</sub>N<sub>4</sub>OS [M + H]<sup>+</sup> 443.1900, found 443.1901.

#### (*S*)-2-(Benzylamino)-*N*-(4-methoxyphenyl)propanamide (**99**)

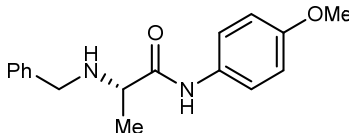

**99**

According to **General Procedure A** with 2-chloro-*N*-(4-methoxyphenyl)propanamide **E2** (63.9 mg, 0.30 mmol, 1.5 equiv.) and benzylamine **A1** (21.4 mg, 0.20 mmol, 1.0 equiv.) for 72 h, the reaction mixture was purified by flash column chromatography on silica gel (petroleum ether/EtOAc = 1/1) to yield the product **99** as a white solid (54.5 mg, 96% yield, 93% e.e.).

**HPLC** analysis: Chiralcel IA (*n*-hexane/*i*-PrOH = 90/10, flow rate 0.8 mL/min,  $\lambda$  = 254 nm), *t*<sub>R</sub> (minor) = 21.65 min, *t*<sub>R</sub> (major) = 23.65 min.

**<sup>1</sup>H NMR** (400 MHz, CDCl<sub>3</sub>)  $\delta$  9.30 (s, 1H), 7.50 – 7.46 (m, 2H), 7.37 – 7.25 (m, 5H), 6.88 – 6.84 (m, 2H), 3.81 (s, 2H), 3.78 (s, 3H), 3.38 (q, *J* = 7.0 Hz, 1H), 2.20 (s, 1H), 1.40 (d, *J* = 7.0 Hz, 3H).

**<sup>13</sup>C NMR** (100 MHz, CDCl<sub>3</sub>)  $\delta$  172.4, 156.1, 138.9, 130.9, 128.6, 128.0, 127.4, 121.0, 114.0, 58.3, 55.4, 52.6, 19.6.

**HRMS** (ESI) *m/z* calcd. for C<sub>17</sub>H<sub>21</sub>N<sub>2</sub>O<sub>2</sub> [M + H]<sup>+</sup> 285.1598, found 285.1592.

#### (*S*)-2-(Benzylamino)-*N*-(4-(trifluoromethyl)phenyl)propanamide (**100**)

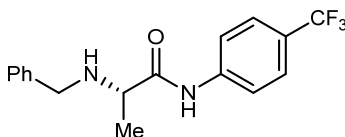

**100**

According to **General Procedure A** with 2-chloro-*N*-(4-(trifluoromethyl)phenyl)propanamide **E3** (75.3 mg, 0.30 mmol, 1.5 equiv.) and benzylamine **A1** (21.4 mg, 0.20 mmol, 1.0 equiv.) for 72 h, the reaction mixture was purified by flash column chromatography on silica gel (petroleum ether/EtOAc = 2/1) to yield the product **100** as a colorless oil (43.6 mg, 68% yield, 90% e.e.).

**HPLC** analysis: Chiralcel IA (*n*-hexane/*i*-PrOH = 90/10, flow rate 0.8 mL/min,  $\lambda$  = 254 nm),  $t_R$  (minor) = 11.29 min,  $t_R$  (major) = 12.28 min.

**<sup>1</sup>H NMR** (400 MHz, CDCl<sub>3</sub>)  $\delta$  9.63 (s, 1H), 7.70 – 7.68 (m, 2H), 7.58 – 7.56 (m, 2H), 7.38 – 7.27 (m, 5H), 3.87 – 3.79 (m, 2H), 3.42 (q,  $J$  = 7.0 Hz, 1H), 2.09 (s, 1H), 1.42 (d,  $J$  = 7.0 Hz, 3H).

**<sup>13</sup>C NMR** (100 MHz, CDCl<sub>3</sub>)  $\delta$  173.2, 140.7 (d,  $J$  = 1.2 Hz), 138.7, 128.8, 128.0, 127.6, 126.2 (q,  $J$  = 3.8 Hz), 125.8 (q,  $J$  = 31.6 Hz), 124.1 (q,  $J$  = 269.8 Hz), 118.9, 58.4, 52.8, 19.5.

**<sup>19</sup>F NMR** (376 MHz, CDCl<sub>3</sub>)  $\delta$  -62.02 (s, 3F).

**HRMS** (ESI)  $m/z$  calcd. for C<sub>17</sub>H<sub>18</sub>F<sub>3</sub>N<sub>2</sub>O [M + H]<sup>+</sup> 323.1366, found 323.1361.

#### *tert*-Butyl benzyl-*L*-alanylglycinate (**101**)

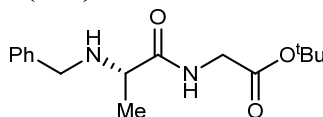

**101**

According to **General Procedure A** with *tert*-butyl (2-chloropropanoyl)glycinate **E4** (66.3 mg, 0.30 mmol, 1.5 equiv.) and benzylamine **A1** (21.4 mg, 0.20 mmol, 1.0 equiv.) for 72 h, the reaction mixture was purified by preparative thin-layer chromatography on silica gel (EtOAc/CH<sub>3</sub>OH = 15/1) to yield the product **101** as a colorless oil (42.7 mg, 73% yield, 92% e.e.).

**HPLC** analysis: Chiralcel IF (*n*-hexane/*i*-PrOH = 97/3, flow rate 0.8 mL/min,  $\lambda$  = 214 nm),  $t_R$  (major) = 33.21 min,  $t_R$  (minor) = 40.35 min.

**<sup>1</sup>H NMR** (400 MHz, CDCl<sub>3</sub>)  $\delta$  7.72 (s, 1H), 7.35 – 7.32 (m, 4H), 7.30 – 7.24 (m, 1H), 4.01 – 3.87 (m, 2H), 3.86 – 3.71 (m, 2H), 3.28 (q,  $J$  = 6.9 Hz, 1H), 1.78 (s, 1H), 1.48 (s, 9H), 1.33 (d,  $J$  = 7.0 Hz, 3H).

**<sup>13</sup>C NMR** (100 MHz, CDCl<sub>3</sub>)  $\delta$  175.0, 168.9, 139.5, 128.5, 128.1, 127.2, 82.0, 57.6, 52.5, 41.5, 28.0, 19.7.

**HRMS** (ESI)  $m/z$  calcd. for C<sub>16</sub>H<sub>25</sub>N<sub>2</sub>O<sub>3</sub> [M + H]<sup>+</sup> 293.1860, found 293.1854.

#### 3-Ethyl 5-methyl (*S*)-2-((2-((*S*)-2-(benzylamino)propanamido)ethoxy)methyl)-4-(2-chlorophenyl)-6-methyl-1,4-dihydropyridine-3,5-dicarboxylate (**102**)

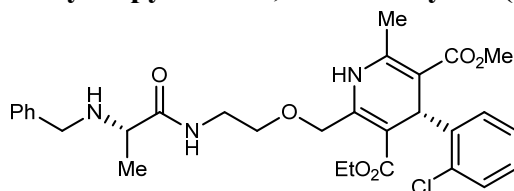

**102**

According to **General Procedure A** with 3-ethyl 5-methyl (4*S*)-4-(2-chlorophenyl)-2-((2-(2-chloropropanamido)ethoxy)methyl)-6-methyl-1,4-dihydropyridine-3,5-dicarboxylate **E5** (149.4 mg, 0.30 mmol, 1.5 equiv.) and benzylamine **A1** (21.4 mg, 0.20 mmol, 1.0 equiv.) for 72 h, the reaction mixture was purified by preparative thin-layer chromatography on silica gel (EtOAc) to yield the product **102** as a yellowish oil (95.8 mg, 84% yield, >20:1 d.r.). The diastereomeric ratio was determined by crude  $^1\text{H}$  NMR spectroscopy.

According to **General Procedure A** with 3-ethyl 5-methyl (4*S*)-4-(2-chlorophenyl)-2-((2-(2-chloropropanamido)ethoxy)methyl)-6-methyl-1,4-dihydropyridine-3,5-dicarboxylate **E5** (99.6 mg, 0.20 mmol, 1.0 equiv.) and benzylamine **A1** (21.4 mg, 0.20 mmol, 1.0 equiv.) for 72 h, the reaction mixture was purified by preparative thin-layer chromatography on silica gel (EtOAc) to yield the product **102** as a yellowish oil (78.2 mg, 69% yield, 18:1 d.r.). The diastereomeric ratio was determined by crude  $^1\text{H}$  NMR spectroscopy.

$^1\text{H}$  NMR (400 MHz,  $\text{CDCl}_3$ )  $\delta$  7.64 – 7.61 (m, 1H), 7.38 – 7.26 (m, 7H), 7.23 – 7.21 (m, 1H), 7.10 – 7.06 (m, 1H), 7.04 – 7.00 (m, 1H), 5.41 (s, 1H), 4.78 – 4.65 (m, 2H), 4.09 – 3.96 (m, 2H), 3.75 (s, 2H), 3.68 – 3.58 (m, 5H), 3.56 – 3.51 (m, 2H), 3.29 (q,  $J$  = 6.8 Hz, 1H), 2.34 (s, 3H), 1.73 (s, 1H), 1.34 (d,  $J$  = 7.0 Hz, 3H), 1.18 (t,  $J$  = 7.1 Hz, 3H).

$^{13}\text{C}$  NMR (100 MHz,  $\text{CDCl}_3$ )  $\delta$  175.4, 168.0, 167.1, 145.8, 145.0, 144.3, 139.2, 132.2, 131.4, 129.1, 128.6, 127.8, 127.3, 127.2, 126.8, 103.6, 101.3, 70.6, 67.9, 59.7, 58.0, 52.6, 50.7, 38.5, 36.9, 19.7, 19.2, 14.2.

HRMS (ESI)  $m/z$  calcd. for  $\text{C}_{30}\text{H}_{37}\text{ClN}_3\text{O}_6$   $[\text{M} + \text{H}]^+$  570.2365, found 570.2360.

### (*S*)-2-(Benzylamino)propanamide (**103**)

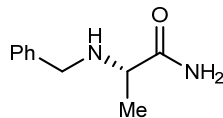

**103**

According to **General Procedure A** with 2-chloropropanamide **E6** (21.4 mg, 0.20 mmol, 1.0 equiv.) and benzylamine **A1** (32.1 mg, 0.30 mmol, 1.5 equiv.) for 72 h, the reaction mixture was purified by preparative thin-layer chromatography on silica gel (EtOAc/ $\text{CH}_3\text{OH}$  = 10/1) to yield the product **103** as a white solid (23.3 mg, 65% yield, 95% e.e.).

HPLC analysis: Chiralcel OD3 ( $n$ -hexane/ $i$ -PrOH = 80/20, flow rate 0.8 mL/min,  $\lambda$  = 214 nm),  $t_R$  (major) = 9.78 min,  $t_R$  (minor) = 14.53 min.

$^1\text{H}$  NMR (400 MHz,  $\text{CDCl}_3$ )  $\delta$  7.36 – 7.25 (m, 5H), 7.10 (s, 1H), 5.95 (s, 1H), 3.77 (q,  $J$  = 13.1 Hz, 2H), 3.26 (q,  $J$  = 7.0 Hz, 1H), 1.77 (s, 1H), 1.35 (d,  $J$  = 6.9 Hz, 3H).

$^{13}\text{C}$  NMR (100 MHz,  $\text{CDCl}_3$ )  $\delta$  178.1, 139.4, 128.5, 128.0, 127.3, 57.7, 52.5, 19.6.

HRMS (ESI)  $m/z$  calcd. for  $\text{C}_{10}\text{H}_{15}\text{N}_2\text{O}$   $[\text{M} + \text{H}]^+$  179.1179, found 179.1178.

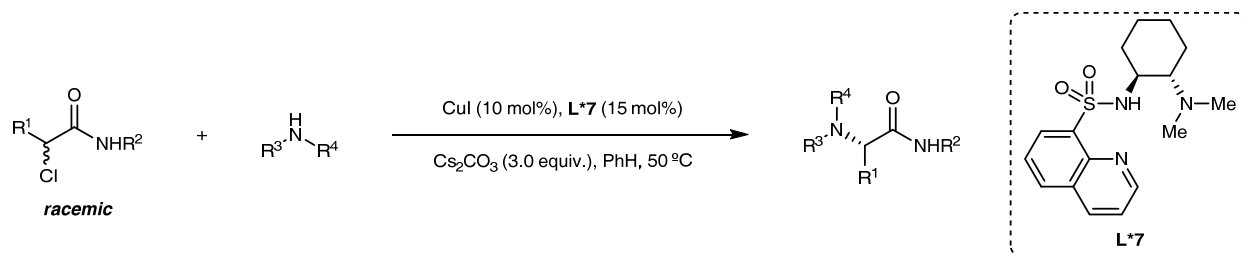

### General procedure E:

Under argon atmosphere, an oven-dried resealable Schlenk tube equipped with a magnetic stir

bar was charged with CuI (3.8 mg, 0.02 mmol, 10 mol%), **L\*7** (10.0 mg, 0.03 mmol, 15 mol%), Cs<sub>2</sub>CO<sub>3</sub> (195.5 mg, 0.60 mmol, 3.0 equiv.), and anhydrous PhH (2.0 mL). Then, the mixture was stirred at room temperature for 1 h. After that,  $\alpha$ -alkyl secondary alkyl chloride (0.30 mmol, 1.5 equiv.), alkyl amine (0.20 mmol, 1.0 equiv.), and anhydrous PhH (2.0 mL) were sequentially added into the mixture and the reaction mixture was stirred at 50 °C for 96 h. Upon completion (monitored by TLC), the precipitate was filtered off and washed by EtOAc. The filtrate was evaporated and the residue was purified by flash column chromatography or preparative thin-layer chromatography on silica gel to afford the desired product.

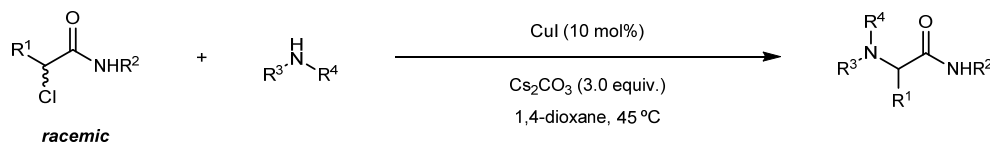

The racemates of products were prepared following the procedure: Under argon atmosphere, an oven-dried resealable Schlenk tube equipped with a magnetic stir bar was charged with CuI (3.8 mg, 0.02 mmol, 10 mol%), Cs<sub>2</sub>CO<sub>3</sub> (195.5 mg, 0.60 mmol, 3.0 equiv.),  $\alpha$ -alkyl secondary alkyl chloride (0.30 mmol, 1.5 equiv.), alkyl amine (0.20 mmol, 1.0 equiv.), and anhydrous 1,4-dioxane (4.0 mL) were sequentially added into the mixture and the reaction mixture was stirred at 45 °C for 72 or 96 h. Upon completion (monitored by TLC), the precipitate was filtered off and washed by EtOAc. The filtrate was evaporated and the residue was purified by flash column chromatography or preparative thin-layer chromatography on silica gel to afford the desired product.

#### (S)-2-(Diethylamino)-N-phenylbutanamide (**104**)

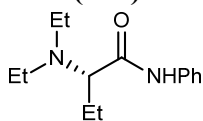

**104**

According to **General Procedure E** with 2-chloro-*N*-phenylbutanamide **E7** (59.1 mg, 0.30 mmol, 1.5 equiv.) and diethylamine **A51** (14.6 mg, 0.20 mmol, 1.0 equiv.) for 96 h, the reaction mixture was purified by flash column chromatography on silica gel (petroleum ether/EtOAc = 1/2) to yield the product **104** as a colorless oil (32.3 mg, 69% yield, 96% e.e.).

**HPLC** analysis: Chiralcel IG (*n*-hexane/*i*-PrOH = 95/5, flow rate 1.0 mL/min,  $\lambda$  = 254 nm),  $t_R$  (major) = 11.30 min,  $t_R$  (minor) = 14.58 min.

**A gram-scale experiment:** According to **General Procedure E** with 2-chloro-*N*-phenylbutanamide **E7** (1478.0 mg, 7.5 mmol, 1.5 equiv.) and diethylamine **A51** (365.4 mg, 5.0 mmol, 1.0 equiv.) for 96 h, the reaction mixture was purified by flash column chromatography on silica gel (petroleum ether/EtOAc = 1/2) to yield the product **104** as a colorless oil (804.8 mg, 69% yield, 95% e.e.).

**<sup>1</sup>H NMR** (400 MHz, CDCl<sub>3</sub>)  $\delta$  9.47 (s, 1H), 7.57 – 7.55 (m, 2H), 7.34 – 7.30 (m, 2H), 7.10 – 7.06 (m, 1H), 3.22 (dd,  $J$  = 7.7, 4.9 Hz, 1H), 2.75 – 2.67 (m, 2H), 2.65 – 2.56 (m, 2H), 1.96 – 1.85 (m, 1H), 1.76 – 1.66 (m, 1H), 1.12 – 1.07 (m, 9H).

**<sup>13</sup>C NMR** (100 MHz, CDCl<sub>3</sub>)  $\delta$  172.6, 138.0, 128.9, 123.7, 119.1, 66.6, 44.3, 19.6, 13.3, 12.8.

**HRMS** (ESI)  $m/z$  calcd. for C<sub>14</sub>H<sub>23</sub>N<sub>2</sub>O [ $M$  +  $H$ ]<sup>+</sup> 235.1805, found 235.1801.

**(S)-2-(Diethylamino)-*N*-phenylhexanamide (105)**

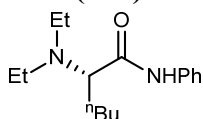

**105**

According to **General Procedure E** with 2-chloro-*N*-phenylhexanamide **E8** (67.5 mg, 0.30 mmol, 1.5 equiv.) and diethylamine **A51** (14.6 mg, 0.20 mmol, 1.0 equiv.) for 96 h, the reaction mixture was purified by flash column chromatography on silica gel (petroleum ether/EtOAc = 3/1) to yield the product **105** as a colorless oil (41.4 mg, 79% yield, 95% e.e.).

**HPLC** analysis: Chiralcel IG (*n*-hexane/*i*-PrOH = 99/1, flow rate 0.8 mL/min,  $\lambda$  = 254 nm),  $t_R$  (major) = 20.56 min,  $t_R$  (minor) = 31.66 min.

**$^1\text{H}$  NMR** (400 MHz,  $\text{CDCl}_3$ )  $\delta$  9.49 (s, 1H), 7.58 – 7.54 (m, 2H), 7.34 – 7.29 (m, 2H), 7.10 – 7.06 (m, 1H), 3.28 – 3.25 (m, 1H), 2.72 – 2.63 (m, 2H), 2.61 – 2.52 (m, 2H), 1.91 – 1.81 (m, 1H), 1.66 – 1.54 (m, 2H), 1.42 – 1.31 (m, 3H), 1.13 (t,  $J$  = 7.1 Hz, 6H), 0.95 (t,  $J$  = 7.2 Hz, 3H).

**$^{13}\text{C}$  NMR** (101 MHz,  $\text{CDCl}_3$ )  $\delta$  173.0, 138.1, 129.0, 123.6, 119.0, 64.8, 44.4, 30.6, 25.9, 23.0, 14.0, 13.5.

**HRMS** (ESI)  $m/z$  calcd. for  $\text{C}_{16}\text{H}_{27}\text{N}_2\text{O}$  [ $\text{M} + \text{H}$ ] $^+$  263.2118, found 263.2114.

**(S)-2-(Diethylamino)-4-methyl-*N*-phenylpentanamide (106)**

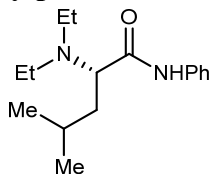

**106**

According to **General Procedure E** with 2-chloro-4-methyl-*N*-phenylpentanamide **E9** (67.5 mg, 0.30 mmol, 1.5 equiv.), diethylamine **A51** (14.6 mg, 0.20 mmol, 1.0 equiv.) for 96 h, the reaction mixture was purified by flash column chromatography on silica gel (petroleum ether/EtOAc = 5/1) to yield the product **106** (35.7 mg, 68% yield, 93% e.e.).

**HPLC** analysis: Chiralcel IG (*n*-hexane/*i*-PrOH = 99/1, flow rate 0.8 mL/min,  $\lambda$  = 254 nm),  $t_R$  (major) = 15.21 min,  $t_R$  (minor) = 21.10 min.

**$^1\text{H}$  NMR** (400 MHz,  $\text{CDCl}_3$ )  $\delta$  9.55 (s, 1H), 7.57 – 7.54 (m, 2H), 7.34 – 7.29 (m, 2H), 7.10 – 7.05 (m, 1H), 3.37 – 3.34 (m, 1H), 2.68 – 2.59 (m, 2H), 2.55 – 2.46 (m, 2H), 1.96 – 1.79 (m, 2H), 1.35 – 1.28 (m, 1H), 1.11 (t,  $J$  = 7.1 Hz, 6H), 0.99 (d,  $J$  = 6.6 Hz, 3H), 0.94 (d,  $J$  = 6.5 Hz, 3H).

**$^{13}\text{C}$  NMR** (100 MHz,  $\text{CDCl}_3$ )  $\delta$  173.2, 138.1, 129.0, 123.6, 119.0, 62.0, 44.4, 34.3, 26.5, 23.5, 22.0, 13.9.

**HRMS** (ESI)  $m/z$  calcd. for  $\text{C}_{16}\text{H}_{27}\text{N}_2\text{O}$  [ $\text{M} + \text{H}$ ] $^+$  263.2118, found 263.2114.

**(S)-2-(Diethylamino)-*N*,5-diphenylpentanamide (107)**

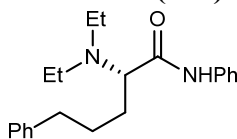

**107**

According to **General Procedure E** with 2-chloro-*N*,5-diphenylpentanamide **E10** (86.1 mg, 0.30

mmol, 1.5 equiv.) and diethylamine **A51** (14.6 mg, 0.20 mmol, 1.0 equiv.) for 96 h, the reaction mixture was purified by flash column chromatography on silica gel (petroleum ether/EtOAc = 3/1) to yield the product **107** as a colorless oil (55.2 mg, 85% yield, 94% e.e.).

**HPLC** analysis: Chiralcel IA (*n*-hexane/*i*-PrOH = 95/5, flow rate 1.0 mL/min,  $\lambda$  = 254 nm),  $t_R$  (major) = 7.57 min,  $t_R$  (minor) = 12.38 min.

**$^1\text{H}$  NMR** (400 MHz,  $\text{CDCl}_3$ )  $\delta$  9.50 (s, 1H), 7.57 – 7.54 (m, 2H), 7.33 – 7.25 (m, 4H), 7.21 – 7.14 (m, 3H), 7.10 – 7.05 (m, 1H), 3.32 – 3.29 (m, 1H), 2.73 – 2.61 (m, 4H), 2.58 – 2.49 (m, 2H), 2.04 – 1.89 (m, 2H), 1.77 – 1.63 (m, 2H), 1.08 (t,  $J$  = 7.1 Hz, 6H).

**$^{13}\text{C}$  NMR** (100 MHz,  $\text{CDCl}_3$ )  $\delta$  172.6, 142.0, 138.0, 128.9, 128.4, 128.2, 125.7, 123.7, 119.1, 64.8, 44.4, 36.1, 30.0, 25.8, 13.4.

**HRMS** (ESI)  $m/z$  calcd. for  $\text{C}_{21}\text{H}_{29}\text{N}_2\text{O}$  [ $\text{M} + \text{H}$ ] $^+$  325.2274, found 325.2270.

### (*S*)-2-(Diethylamino)-*N*-phenylhex-5-enamide (**108**)

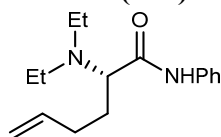

**108**

According to **General Procedure E** with 2-chloro-*N*-phenylhex-5-enamide **E11** (66.9 mg, 0.30 mmol, 1.5 equiv.) and diethylamine **A51** (14.6 mg, 0.20 mmol, 1.0 equiv.) for 96 h, the reaction mixture was purified by flash column chromatography on silica gel (petroleum ether/EtOAc = 3/1) to yield the product **108** as a colorless oil (37.0 mg, 71% yield, 95% e.e.).

**HPLC** analysis: Chiralcel IA (*n*-hexane/*i*-PrOH = 95/5, flow rate 1.0 mL/min,  $\lambda$  = 254 nm),  $t_R$  (major) = 6.02 min,  $t_R$  (minor) = 7.48 min.

**$^1\text{H}$  NMR** (400 MHz,  $\text{CDCl}_3$ )  $\delta$  9.50 (s, 1H), 7.57 – 7.55 (m, 2H), 7.34 – 7.30 (m, 2H), 7.10 – 7.06 (m, 1H), 5.88 – 5.78 (m, 1H), 5.10 – 4.99 (m, 2H), 3.34 – 3.31 (m, 1H), 2.72 – 2.63 (m, 2H), 2.59 – 2.51 (m, 2H), 2.46 – 2.37 (m, 1H), 2.25 – 2.16 (m, 1H), 2.05 – 1.96 (m, 1H), 1.71 – 1.63 (m, 1H), 1.11 (t,  $J$  = 7.1 Hz, 6H).

**$^{13}\text{C}$  NMR** (100 MHz,  $\text{CDCl}_3$ )  $\delta$  172.8, 138.2, 138.0, 129.0, 123.8, 119.1, 115.3, 63.5, 44.5, 32.4, 24.8, 13.7.

**HRMS** (ESI)  $m/z$  calcd. for  $\text{C}_{16}\text{H}_{25}\text{N}_2\text{O}$  [ $\text{M} + \text{H}$ ] $^+$  261.1961, found 261.1958.

### (*S*)-2-(Diethylamino)-*N*,6-diphenylhex-5-ynamide (**109**)

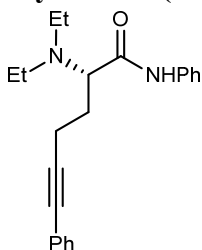

**109**

According to **General Procedure E** with 2-chloro-*N*,6-diphenylhex-5-ynamide **E12** (89.1 mg, 0.30 mmol, 1.5 equiv.) and diethylamine **A51** (14.6 mg, 0.20 mmol, 1.0 equiv.) for 96 h, the reaction mixture was purified by flash column chromatography on silica gel (petroleum ether/EtOAc = 3/1) to yield the product **109** as a colorless oil (37.4 mg, 56% yield, 93% e.e.).

**HPLC** analysis: Chiralcel IG (*n*-hexane/*i*-PrOH = 90/10, flow rate 0.8 mL/min,  $\lambda$  = 254 nm),  $t_R$

(major) = 12.39 min,  $t_R$  (minor) = 16.51 min.

**$^1\text{H}$  NMR** (400 MHz,  $\text{CDCl}_3$ )  $\delta$  9.54 (s, 1H), 7.57 – 7.55 (m, 2H), 7.41 – 7.36 (m, 2H), 7.35 – 7.31 (m, 2H), 7.29 – 7.26 (m, 3H), 7.11 – 7.07 (m, 1H), 3.66 (dd,  $J$  = 8.9, 3.0 Hz, 1H), 2.79 – 2.76 (m, 2H), 2.70 – 2.61 (m, 2H), 2.60 – 2.52 (m, 2H), 2.21 – 2.13 (m, 1H), 1.88 – 1.79 (m, 1H), 1.15 (t,  $J$  = 7.1 Hz, 6H).

**$^{13}\text{C}$  NMR** (101 MHz,  $\text{CDCl}_3$ )  $\delta$  172.7, 137.9, 131.5, 129.0, 128.2, 127.6, 123.79, 123.77, 119.1, 89.7, 81.4, 62.0, 44.6, 23.8, 18.7, 14.1.

**HRMS** (ESI)  $m/z$  calcd. for  $\text{C}_{22}\text{H}_{27}\text{N}_2\text{O}$   $[\text{M} + \text{H}]^+$  335.2118, found 335.2112.

**(S)-2-(Diethylamino)-4-(1,3-dioxoisindolin-2-yl)-N-phenylbutanamide (110)**

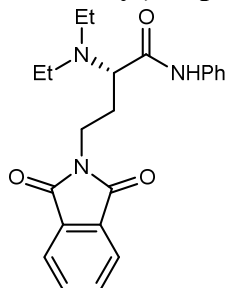

**110**

According to **General Procedure E** with 2-chloro-4-(1,3-dioxoisindolin-2-yl)-N-phenylbutanamide **E13** (102.6 mg, 0.30 mmol, 1.5 equiv.) and diethylamine **A51** (14.6 mg, 0.20 mmol, 1.0 equiv.) for 96 h, the reaction mixture was purified by flash column chromatography on silica gel (petroleum ether/EtOAc = 1/1) to yield the product **110** as a colorless oil (46.3 mg, 61% yield, 94% e.e.).

**HPLC** analysis: Chiralcel IA ( $n$ -hexane/ $i$ -PrOH = 95/5, flow rate 0.8 mL/min,  $\lambda$  = 254 nm),  $t_R$  (minor) = 34.79 min,  $t_R$  (major) = 38.30 min.

**$^1\text{H}$  NMR** (400 MHz,  $\text{CDCl}_3$ )  $\delta$  9.41 (s, 1H), 7.87 – 7.82 (m, 2H), 7.74 – 7.69 (m, 2H), 7.57 – 7.53 (m, 2H), 7.34 – 7.29 (m, 2H), 7.10 – 7.06 (m, 1H), 4.11 – 4.04 (m, 1H), 3.93 – 3.86 (m, 1H), 3.47 (dd,  $J$  = 8.9, 3.2 Hz, 1H), 2.67 – 2.58 (m, 2H), 2.52 – 2.44 (m, 2H), 2.31 – 2.23 (m, 1H), 1.96 – 1.89 (m, 1H), 1.08 (t,  $J$  = 7.1 Hz, 6H).

**$^{13}\text{C}$  NMR** (100 MHz,  $\text{CDCl}_3$ )  $\delta$  171.9, 168.4, 137.8, 133.9, 132.1, 128.9, 123.8, 123.2, 119.1, 62.1, 44.6, 37.3, 24.4, 13.9.

**HRMS** (ESI)  $m/z$  calcd. for  $\text{C}_{22}\text{H}_{26}\text{N}_3\text{O}_3$   $[\text{M} + \text{H}]^+$  380.1969, found 380.1963.

**(S)-2-(Diethylamino)-4-phenoxy-N-phenylbutanamide (111)**

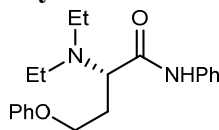

**111**

According to **General Procedure E** with 2-chloro-4-phenoxy-N-phenylbutanamide **E14** (86.7 mg, 0.30 mmol, 1.5 equiv.) and diethylamine **A51** (14.6 mg, 0.20 mmol, 1.0 equiv.) for 96 h, the reaction mixture was purified by flash column chromatography on silica gel (petroleum ether/EtOAc = 3/1) to yield the product **111** as a colorless oil (42.4 mg, 65% yield, 89% e.e.).

**HPLC** analysis: Chiralcel IA ( $n$ -hexane/ $i$ -PrOH = 95/5, flow rate 1.0 mL/min,  $\lambda$  = 254 nm),  $t_R$  (major) = 7.82 min,  $t_R$  (minor) = 26.45 min.

**<sup>1</sup>H NMR** (400 MHz, CDCl<sub>3</sub>) δ 9.55 (s, 1H), 7.56 – 7.54 (m, 2H), 7.35 – 7.25 (m, 4H), 7.11 – 7.07 (m, 1H), 6.95 – 6.90 (m, 3H), 4.34 – 4.29 (m, 1H), 4.23 – 4.17 (m, 1H), 3.70 – 3.67 (m, 1H), 2.70 – 2.61 (m, 2H), 2.57 – 2.48 (m, 2H), 2.36 – 2.28 (m, 1H), 2.08 – 2.00 (m, 1H), 1.16 (t, *J* = 7.1 Hz, 6H).

**<sup>13</sup>C NMR** (100 MHz, CDCl<sub>3</sub>) δ 172.8, 158.8, 137.9, 129.4, 129.0, 123.9, 120.6, 119.1, 114.4, 66.4, 60.0, 44.8, 24.2, 14.1.

**HRMS** (ESI) *m/z* calcd. for C<sub>20</sub>H<sub>27</sub>N<sub>2</sub>O<sub>2</sub> [*M* + *H*]<sup>+</sup> 327.2067, found 327.2062.

**(*S*)-2-(Diethylamino)-4-(methylthio)-*N*-phenylbutanamide (112)**

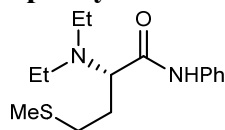

112

According to **General Procedure E** with 2-chloro-4-(methylthio)-*N*-phenylbutanamide **E15** (72.9 mg, 0.30 mmol, 1.5 equiv.) and diethylamine **A51** (14.6 mg, 0.20 mmol, 1.0 equiv.) for 96 h, the reaction mixture was purified by flash column chromatography on silica gel (petroleum ether/EtOAc = 3/1) to yield the product **112** as a colorless oil (38.7 mg, 69% yield, 92% e.e.).

**HPLC** analysis: Chiralcel IA (*n*-hexane/*i*-PrOH = 95/5, flow rate 1.0 mL/min, λ = 254 nm), *t<sub>R</sub>* (major) = 7.28 min, *t<sub>R</sub>* (minor) = 12.64 min.

**<sup>1</sup>H NMR** (400 MHz, CDCl<sub>3</sub>) δ 9.52 (s, 1H), 7.56 – 7.53 (m, 2H), 7.35 – 7.30 (m, 2H), 7.11 – 7.07 (m, 1H), 3.58 – 3.55 (m, 1H), 2.93 – 2.86 (m, 1H), 2.74 – 2.69 (m, 1H), 2.68 – 2.61 (m, 2H), 2.56 – 2.47 (m, 2H), 2.25 – 2.16 (m, 1H), 2.14 (s, 3H), 1.83 – 1.75 (m, 1H), 1.14 (t, *J* = 7.1 Hz, 6H).

**<sup>13</sup>C NMR** (100 MHz, CDCl<sub>3</sub>) δ 172.6, 137.9, 129.0, 123.8, 119.1, 62.3, 44.7, 33.2, 24.2, 15.4, 14.0.

**HRMS** (ESI) *m/z* calcd. for C<sub>15</sub>H<sub>25</sub>N<sub>2</sub>OS [*M* + *H*]<sup>+</sup> 281.1682, found 281.1678.

**(*S*)-2-(Diethylamino)-5,5,5-trifluoro-*N*-phenylpentanamide (113)**

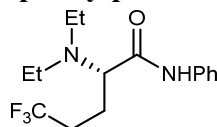

113

According to **General Procedure E** with 2-chloro-5,5,5-trifluoro-*N*-phenylpentanamide **E16** (79.5 mg, 0.30 mmol, 1.5 equiv.) and diethylamine **A51** (14.6 mg, 0.20 mmol, 1.0 equiv.) for 96 h, the reaction mixture was purified by flash column chromatography on silica gel (petroleum ether/EtOAc = 3/1) to yield the product **113** as a colorless oil (31.4 mg, 52% yield, 93% e.e.).

**HPLC** analysis: Chiralcel IA (*n*-hexane/*i*-PrOH = 95/5, flow rate 0.8 mL/min, λ = 254 nm), *t<sub>R</sub>* (major) = 7.73 min, *t<sub>R</sub>* (minor) = 11.65 min.

**<sup>1</sup>H NMR** (400 MHz, CDCl<sub>3</sub>) δ 9.39 (s, 1H), 7.55 – 7.52 (m, 2H), 7.36 – 7.31 (m, 2H), 7.13 – 7.08 (m, 1H), 3.36 (dd, *J* = 9.7, 3.1 Hz, 1H), 2.77 – 2.61 (m, 3H), 2.56 – 2.48 (m, 2H), 2.30 – 2.14 (m, 1H), 2.10 – 2.00 (m, 1H), 1.86 – 1.78 (m, 1H), 1.13 (t, *J* = 7.1 Hz, 6H).

**<sup>13</sup>C NMR** (100 MHz, CDCl<sub>3</sub>) δ 171.9, 137.6, 129.1, 127.1 (q, *J* = 273.2 Hz), 124.1, 119.2, 62.8, 44.5, 32.8 (q, *J* = 28.2 Hz), 17.6 (q, *J* = 2.8 Hz), 13.8.

**<sup>19</sup>F NMR** (376 MHz, CDCl<sub>3</sub>) δ -66.56 (s, 3F).

**HRMS** (ESI) *m/z* calcd. for C<sub>15</sub>H<sub>22</sub>F<sub>3</sub>N<sub>2</sub>O [*M* + *H*]<sup>+</sup> 303.1679, found 303.1675.



### Methyl (S)-4-(diethylamino)-5-oxo-5-(phenylamino)pentanoate (**114**)

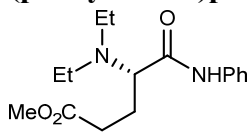

**114**

According to **General Procedure E** with methyl 3-chloro-4-oxo-4-(phenylamino)butanoate **E17** (76.5 mg, 0.30 mmol, 1.5 equiv.) and diethylamine **A51** (14.6 mg, 0.20 mmol, 1.0 equiv.) for 96 h, the reaction mixture was purified by flash column chromatography on silica gel (petroleum ether/EtOAc = 2/1) to yield the product **114** as a colorless oil (34.6 mg, 59% yield, 97% e.e.).

**HPLC** analysis: Chiralcel IA (*n*-hexane/*i*-PrOH = 95/5, flow rate 1.0 mL/min,  $\lambda$  = 254 nm),  $t_R$  (major) = 9.08 min,  $t_R$  (minor) = 12.47 min.

**$^1\text{H}$  NMR** (400 MHz,  $\text{CDCl}_3$ )  $\delta$  9.44 (s, 1H), 7.55 – 7.53 (m, 2H), 7.34 – 7.30 (m, 2H), 7.11 – 7.07 (m, 1H), 3.68 (s, 3H), 3.39 – 3.35 (m, 1H), 2.81 – 2.73 (m, 1H), 2.70 – 2.52 (m, 5H), 2.10 – 1.92 (m, 2H), 1.12 (t,  $J$  = 7.1 Hz, 6H).

**$^{13}\text{C}$  NMR** (100 MHz,  $\text{CDCl}_3$ )  $\delta$  174.0, 172.5, 137.8, 129.0, 123.8, 119.1, 62.9, 51.6, 44.4, 32.4, 20.3, 13.8.

**HRMS** (ESI)  $m/z$  calcd. for  $\text{C}_{16}\text{H}_{25}\text{N}_2\text{O}_3$   $[\text{M} + \text{H}]^+$  293.1860, found 293.1857.

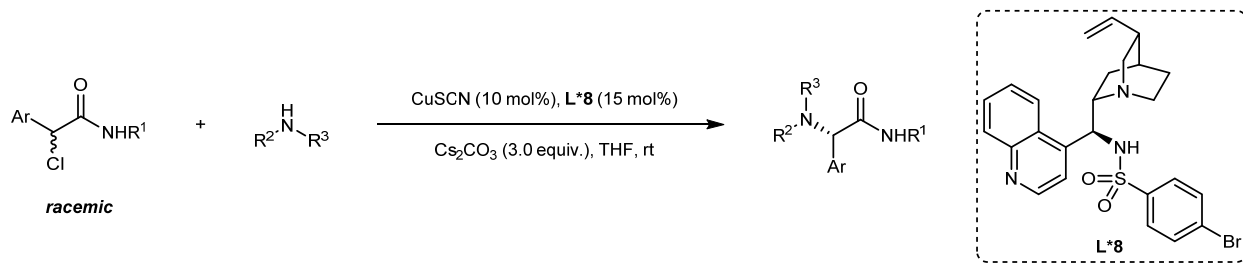

### General procedure F:

Under argon atmosphere, an oven-dried resealable Schlenk tube equipped with a magnetic stir bar was charged with CuSCN (2.4 mg, 0.02 mmol, 10 mol%), **L\*8** (15.3 mg, 0.03 mmol, 15 mol%),  $\text{Cs}_2\text{CO}_3$  (195.5 mg, 0.60 mmol, 3.0 equiv.), and anhydrous THF (2.0 mL). Then, the mixture was stirred at room temperature for 1 h. After that,  $\alpha$ -aryl secondary alkyl chloride (0.30 mmol, 1.5 equiv.), alkyl amine (0.20 mmol, 1.0 equiv.), and anhydrous THF (2.0 mL) were sequentially added into the mixture and the reaction mixture was stirred at room temperature for 72 h. Upon completion (monitored by TLC), the precipitate was filtered off and washed by EtOAc. The filtrate was evaporated and the residue was purified by flash column chromatography on silica gel to afford the desired product.

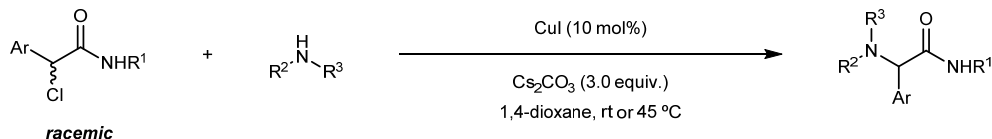

The racemates of products were prepared following the procedure: Under argon atmosphere, an oven-dried resealable Schlenk tube equipped with a magnetic stir bar was charged with CuI (3.8 mg, 0.02 mmol, 10 mol%),  $\text{Cs}_2\text{CO}_3$  (195.5 mg, 0.60 mmol, 3.0 equiv.),  $\alpha$ -aryl secondary alkyl

chloride (0.30 mmol, 1.5 equiv.), alkyl amine (0.20 mmol, 1.0 equiv.), and anhydrous 1,4-dioxane (4.0 mL) were sequentially added into the mixture and the reaction mixture was stirred at rt or 45 °C for 72 h. Upon completion (monitored by TLC), the precipitate was filtered off and washed by EtOAc. The filtrate was evaporated and the residue was purified by flash column chromatography on silica gel to afford the desired product.

**(S)-2-(Benzylamino)-N,2-diphenylacetamide (115)**

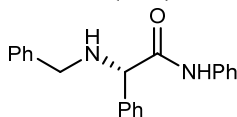

**115**

According to **General Procedure F** with 2-chloro-*N*,2-diphenylacetamide **E18** (73.5 mg, 0.30 mmol, 1.5 equiv.) and benzylamine **A1** (21.4 mg, 0.20 mmol, 1.0 equiv.) for 72 h, the reaction mixture was purified by flash column chromatography on silica gel (petroleum ether/EtOAc = 3/1) to yield the product **115** as a white solid (44.0 mg, 70% yield, 94% e.e.).

**HPLC** analysis: Chiralcel IA (*n*-hexane/*i*-PrOH = 80/20, flow rate 1.0 mL/min,  $\lambda$  = 254 nm),  $t_R$  (minor) = 9.54 min,  $t_R$  (major) = 11.78 min.

**$^1\text{H}$  NMR** (400 MHz,  $\text{CDCl}_3$ )  $\delta$  9.39 (s, 1H), 7.59 – 7.57 (m, 2H), 7.41 – 7.38 (m, 2H), 7.36 – 7.27 (m, 10H), 7.11 – 7.08 (m, 1H), 4.34 (s, 1H), 3.87 (s, 2H), 2.05 (s, 1H).

**$^{13}\text{C}$  NMR** (100 MHz,  $\text{CDCl}_3$ )  $\delta$  170.1, 138.85, 138.83, 137.6, 129.0, 128.9, 128.7, 128.3, 128.1, 127.5, 127.2, 124.2, 119.4, 67.6, 52.8.

**HRMS** (ESI)  $m/z$  calcd. for  $\text{C}_{21}\text{H}_{21}\text{N}_2\text{O}$   $[\text{M} + \text{H}]^+$  317.1648, found 317.1653.

**(S)-2-(Benzylamino)-2-(3-methoxyphenyl)-N-phenylacetamide (116)**

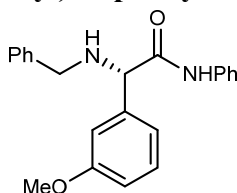

**116**

According to **General Procedure F** with 2-chloro-2-(3-methoxyphenyl)-*N*-phenylacetamide **E19** (82.5 mg, 0.30 mmol, 1.5 equiv.) and benzylamine **A1** (21.4 mg, 0.20 mmol, 1.0 equiv.) for 72 h, the reaction mixture was purified by flash column chromatography on silica gel (petroleum ether/EtOAc = 2/1) to yield the product **116** as a white solid (53.8 mg, 78% yield, 94% e.e.).

**HPLC** analysis: Chiralcel IA (*n*-hexane/*i*-PrOH = 80/20, flow rate 1.0 mL/min,  $\lambda$  = 254 nm),  $t_R$  (minor) = 10.18 min,  $t_R$  (major) = 12.29 min.

**$^1\text{H}$  NMR** (400 MHz,  $\text{CDCl}_3$ )  $\delta$  9.34 (s, 1H), 7.58 – 7.55 (m, 2H), 7.38 – 7.28 (m, 7H), 7.24 – 7.22 (m, 1H), 7.11 – 7.07 (m, 1H), 6.98 (d,  $J$  = 7.7 Hz, 1H), 6.94 (t,  $J$  = 2.1 Hz, 1H), 6.84 – 6.81 (m, 1H), 4.30 (s, 1H), 3.85 (s, 2H), 3.76 (s, 3H), 2.07 (s, 1H).

**$^{13}\text{C}$  NMR** (100 MHz,  $\text{CDCl}_3$ )  $\delta$  170.0, 159.9, 140.3, 138.8, 137.6, 129.9, 128.9, 128.7, 128.1, 127.5, 124.2, 119.41, 119.35, 113.6, 113.0, 67.5, 55.2, 52.7.

**HRMS** (ESI)  $m/z$  calcd. for  $\text{C}_{22}\text{H}_{23}\text{N}_2\text{O}_2$   $[\text{M} + \text{H}]^+$  347.1754, found 347.1760.

**(S)-2-(Benzylamino)-2-(naphthalen-2-yl)-N-phenylacetamide (117)**

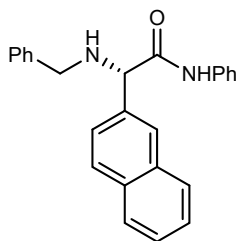

117

According to **General Procedure F** with 2-chloro-2-(naphthalen-2-yl)-*N*-phenylacetamide **E20** (88.5 mg, 0.30 mmol, 1.5 equiv.) and benzylamine **A1** (21.4 mg, 0.20 mmol, 1.0 equiv.) for 72 h, the reaction mixture was purified by flash column chromatography on silica gel (petroleum ether/EtOAc = 5/1) to yield the product **117** as a white solid (60.0 mg, 82% yield, 90% e.e.).

**HPLC** analysis: Chiralcel IA (*n*-hexane/*i*-PrOH = 80/20, flow rate 1.0 mL/min,  $\lambda$  = 254 nm),  $t_R$  (minor) = 12.78 min,  $t_R$  (major) = 16.18 min.

**$^1\text{H}$  NMR** (400 MHz,  $\text{CDCl}_3$ )  $\delta$  9.38 (s, 1H), 7.86 – 7.78 (m, 4H), 7.60 – 7.57 (m, 2H), 7.53 – 7.50 (m, 1H), 7.49 – 7.44 (m, 2H), 7.40 – 7.28 (m, 7H), 7.12 – 7.08 (m, 1H), 4.51 (s, 1H), 3.91 (s, 2H), 2.01 (s, 1H).

**$^{13}\text{C}$  NMR** (100 MHz,  $\text{CDCl}_3$ )  $\delta$  170.0, 138.9, 137.6, 136.2, 133.3, 133.2, 129.0, 128.9, 128.8, 128.2, 128.0, 127.65, 127.58, 126.45, 126.38, 126.3, 124.8, 124.2, 119.5, 67.7, 52.8.

**HRMS** (ESI)  $m/z$  calcd. for  $\text{C}_{25}\text{H}_{23}\text{N}_2\text{O}$   $[\text{M} + \text{H}]^+$  367.1805, found 367.1811.

#### (*S*)-2-(Benzylamino)-2-(naphthalen-1-yl)-*N*-phenylacetamide (**118**)

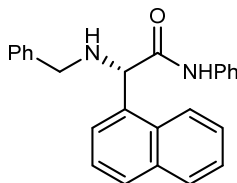

118

According to **General Procedure F** with 2-chloro-2-(naphthalen-1-yl)-*N*-phenylacetamide **E21** (88.5 mg, 0.30 mmol, 1.5 equiv.) and benzylamine **A1** (21.4 mg, 0.20 mmol, 1.0 equiv.) for 72 h, the reaction mixture was purified by flash column chromatography on silica gel (petroleum ether/EtOAc = 5/1) to yield the product **118** as a white solid (43.5 mg, 59% yield, 97% e.e.).

**HPLC** analysis: Chiralcel IH (*n*-hexane/*i*-PrOH = 90/10, flow rate 0.8 mL/min,  $\lambda$  = 254 nm),  $t_R$  (major) = 21.38 min,  $t_R$  (minor) = 28.89 min.

**$^1\text{H}$  NMR** (400 MHz,  $\text{CDCl}_3$ )  $\delta$  9.54 (s, 1H), 8.05 – 8.01 (m, 1H), 7.88 – 7.83 (m, 1H), 7.82 – 7.80 (m, 1H), 7.63 – 7.60 (m, 2H), 7.56 – 7.47 (m, 3H), 7.44 – 7.40 (m, 1H), 7.39 – 7.28 (m, 7H), 7.14 – 7.09 (m, 1H), 5.07 (s, 1H), 3.97 (s, 2H), 2.01 (s, 1H).

**$^{13}\text{C}$  NMR** (100 MHz,  $\text{CDCl}_3$ )  $\delta$  170.4, 138.8, 137.7, 135.1, 134.2, 131.2, 129.02, 129.00, 128.98, 128.8, 128.4, 127.6, 126.8, 125.9, 125.4, 125.2, 124.2, 123.2, 119.4, 63.8, 53.2.

**HRMS** (ESI)  $m/z$  calcd. for  $\text{C}_{25}\text{H}_{23}\text{N}_2\text{O}$   $[\text{M} + \text{H}]^+$  367.1805, found 367.1810.

#### (*S*)-*N*,2-Diphenyl-2-((3-phenylpropyl)amino)acetamide (**119**)

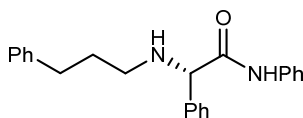

119

According to **General Procedure F** with 2-chloro-*N*,2-diphenylacetamide **E18** (73.5 mg, 0.30 mmol, 1.5 equiv.) and 3-phenylpropan-1-amine **A13** (27.0 mg, 0.20 mmol, 1.0 equiv.) for 72 h, the reaction mixture was purified by flash column chromatography on silica gel (petroleum ether/EtOAc = 1/1) to yield the product **119** as a colorless oil (45.4 mg, 66% yield, 95% e.e.).

**HPLC** analysis: Chiralcel IH (*n*-hexane/*i*-PrOH = 90/10, flow rate 1.0 mL/min,  $\lambda$  = 254 nm),  $t_R$  (major) = 10.14 min,  $t_R$  (minor) = 14.99 min.

**$^1\text{H}$  NMR** (400 MHz,  $\text{CDCl}_3$ )  $\delta$  9.46 (s, 1H), 7.58 – 7.55 (m, 2H), 7.42 – 7.39 (m, 2H), 7.35 – 7.24 (m, 7H), 7.20 – 7.15 (m, 3H), 7.11 – 7.07 (m, 1H), 4.32 (s, 1H), 2.83 – 2.62 (m, 4H), 2.47 (s, 1H), 1.94 – 1.87 (m, 2H).

**$^{13}\text{C}$  NMR** (100 MHz,  $\text{CDCl}_3$ )  $\delta$  170.1, 141.4, 137.6, 129.0, 128.9, 128.4, 128.3, 128.2, 127.2, 126.0, 124.2, 119.5, 68.2, 48.4, 33.5, 31.5.

**HRMS** (ESI)  $m/z$  calcd. for  $\text{C}_{23}\text{H}_{25}\text{N}_2\text{O}$   $[\text{M} + \text{H}]^+$  345.1961, found 345.1966.

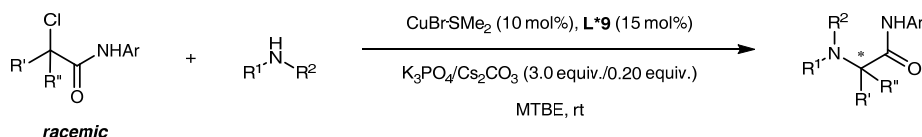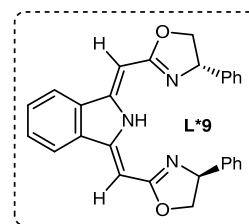

### General procedure G:

Under argon atmosphere, an oven-dried resealable Schlenk tube equipped with a magnetic stir bar was charged with  $\text{CuBrSMe}_2$  (4.1 mg, 0.02 mmol, 10 mol%), **L\*9** (13.0 mg, 0.03 mmol, 15 mol%),  $\text{K}_3\text{PO}_4$  (127.1 mg, 0.60 mmol, 3.0 equiv.),  $\text{Cs}_2\text{CO}_3$  (13.0 mg, 0.04 mmol, 0.2 equiv.), and anhydrous MTBE (1.0 mL). Then, the mixture was stirred at room temperature for 3 h. After that, racemic tertiary alkyl chloride (0.20 mmol, 1.0 equiv.), alkyl amine (0.24 mmol, 1.2 equiv.), and anhydrous MTBE (1.0 mL) were sequentially added into the mixture and the reaction mixture was stirred at room temperature for 7 d. Upon completion (monitored by TLC), the precipitate was filtered off and washed by EtOAc. The filtrate was evaporated and the residue was purified by flash column chromatography or preparative thin-layer chromatography on silica gel on silica gel to afford the desired product.

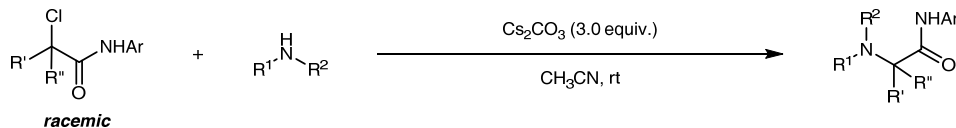

The racemates of products were prepared following the procedure: Under argon atmosphere, an oven-dried resealable Schlenk tube equipped with a magnetic stir bar was charged with  $\text{Cs}_2\text{CO}_3$  (195.5 mg, 0.60 mmol, 3.0 equiv.), racemic tertiary alkyl chloride (0.20 mmol, 1.0 equiv.), amine (0.24 mmol, 1.2 equiv.), and anhydrous  $\text{CH}_3\text{CN}$  (4.0 mL) were sequentially added into the mixture and the reaction mixture was stirred at room temperature for 72 h. Upon completion (monitored by TLC), the precipitate was filtered off and washed by EtOAc. The filtrate was

evaporated and the residue was purified by flash column chromatography or preparative thin-layer chromatography on silica gel on silica gel to afford the desired product.

**(S)-2-(benzylamino)-N-(3,5-bis(trifluoromethyl)phenyl)-2-phenylbutanamide (120)**

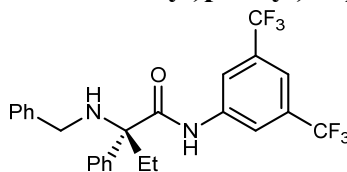

**120**

According to **General Procedure G** with *N*-(3,5-bis(trifluoromethyl)phenyl)-2-chloro-2-phenylbutanamide **E22** (82.0 mg, 0.2 mmol, 1.0 equiv.) and benzylamine **A1** (25.7 mg, 0.24 mmol, 1.2 equiv.) for 7 d, the reaction mixture was purified by flash column chromatography on silica gel (petroleum ether/EtOAc = 10/1) to yield the product **120** as a yellowish solid (68.2 mg, 71% yield, 91% e.e.).

**HPLC** analysis: Chiralcel ODH (*n*-hexane/*i*-PrOH = 85/15, flow rate 1.0 mL/min,  $\lambda$  = 254 nm),  $t_R$  (major) = 6.95 min,  $t_R$  (minor) = 11.39 min.

**$^1\text{H}$  NMR** (400 MHz,  $\text{CDCl}_3$ )  $\delta$  9.62 (s, 1H), 7.94 (s, 2H), 7.61 – 7.59 (m, 2H), 7.53 (s, 1H), 7.43 – 7.37 (m, 6H), 7.35 – 7.28 (m, 2H), 3.76 (d,  $J$  = 12.9 Hz, 1H), 3.55 (d,  $J$  = 12.9 Hz, 1H), 2.57 – 2.41 (m, 2H), 2.25 (s, 1H), 0.85 (t,  $J$  = 7.4 Hz, 3H).

**$^{13}\text{C}$  NMR** (100 MHz,  $\text{CDCl}_3$ )  $\delta$  172.8, 140.0, 139.4, 139.2, 132.2 (q,  $J$  = 33.2 Hz), 128.93, 128.87, 127.9, 127.8, 127.7, 125.8, 123.0 (q,  $J$  = 271.3 Hz), 118.83 – 118.80 (m), 117.2 – 117.0 (m), 68.8, 47.3, 24.9, 7.4.

**$^{19}\text{F}$  NMR** (376 MHz,  $\text{CDCl}_3$ )  $\delta$  -62.97 (s, 6F).

**HRMS** (ESI)  $m/z$  calcd. for  $\text{C}_{25}\text{H}_{23}\text{F}_6\text{N}_2\text{O}$  [ $\text{M} + \text{H}$ ] $^+$  481.1709, found 481.1716.

**(S)-2-(Benzylamino)-N-(3,5-bis(trifluoromethyl)phenyl)-2-phenylhexanamide (121)**

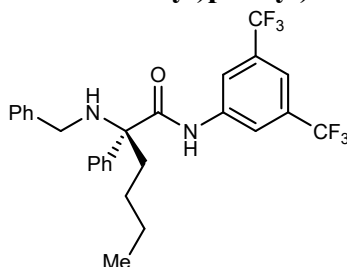

**121**

According to **General Procedure G** with *N*-(3,5-bis(trifluoromethyl)phenyl)-2-chloro-2-phenylhexanamide **E23** (87.6 mg, 0.2 mmol, 1.0 equiv.) and benzylamine **A1** (25.7 mg, 0.24 mmol, 1.2 equiv.) for 7 d, the reaction mixture was purified by flash column chromatography on silica gel (petroleum ether/EtOAc = 10/1) to yield the product **121** as a white solid (54.9 mg, 54% yield, 90% e.e.).

**HPLC** analysis: Chiralcel ODH (*n*-hexane/*i*-PrOH = 80/20, flow rate 1.0 mL/min,  $\lambda$  = 254 nm),  $t_R$  (major) = 4.68 min,  $t_R$  (minor) = 6.72 min.

**$^1\text{H}$  NMR** (400 MHz,  $\text{CDCl}_3$ )  $\delta$  9.62 (s, 1H), 7.94 (s, 2H), 7.62 – 7.59 (m, 2H), 7.53 (s, 1H), 7.43 – 7.28 (m, 8H), 3.76 (d,  $J$  = 12.9 Hz, 1H), 3.56 (d,  $J$  = 12.9 Hz, 1H), 2.51 – 2.36 (m, 2H), 2.24 (s, 1H), 1.50 – 1.37 (m, 2H), 1.22 – 1.07 (m, 2H), 0.93 (t,  $J$  = 7.3 Hz, 3H).

**<sup>13</sup>C NMR** (100 MHz, CDCl<sub>3</sub>) δ 172.8, 140.3, 139.4, 139.2, 132.2 (q, *J* = 33.3 Hz), 128.93, 128.87, 127.9, 127.8, 127.7, 125.8, 123.0 (q, *J* = 271.2 Hz), 118.84 – 118.80 (m), 117.2 – 117.0 (m), 68.4, 47.4, 32.0, 25.3, 22.9, 14.0.

**<sup>19</sup>F NMR** (376 MHz, CDCl<sub>3</sub>) δ -62.99 (s, 6F).

**HRMS** (ESI) *m/z* calcd. for C<sub>27</sub>H<sub>27</sub>F<sub>6</sub>N<sub>2</sub>O [*M* + *H*]<sup>+</sup> 509.2022, found 509.2028.

**(*S*)-2-(Benzylamino)-*N*-(3,5-bis(trifluoromethyl)phenyl)-2-phenylpent-4-enamide (**122**)**

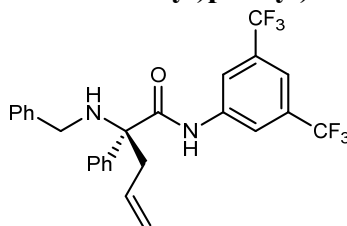

**122**

According to **General Procedure G** with *N*-(3,5-bis(trifluoromethyl)phenyl)-2-chloro-2-phenylpent-4-enamide **E24** (84.2 mg, 0.2 mmol, 1.0 equiv.) and benzylamine **A1** (25.7 mg, 0.24 mmol, 1.2 equiv.) for 7 d, the reaction mixture was purified by flash column chromatography on silica gel (petroleum ether/EtOAc = 10/1) to yield the product **122** as a white solid (61.1 mg, 62% yield, 82% e.e.).

**HPLC** analysis: Chiralcel ODH (*n*-hexane/*i*-PrOH = 80/20, flow rate 1.0 mL/min, λ = 254 nm), *t*<sub>R</sub> (major) = 5.36 min, *t*<sub>R</sub> (minor) = 7.72 min.

**<sup>1</sup>H NMR** (400 MHz, CDCl<sub>3</sub>) δ 9.55 (s, 1H), 7.93 (s, 2H), 7.63 – 7.60 (m, 2H), 7.54 (s, 1H), 7.43 – 7.38 (m, 4H), 7.36 – 7.30 (m, 4H), 5.65 – 5.54 (m, 1H), 5.35 – 5.30 (m, 1H), 7.24 – 7.21 (m, 1H), 3.78 (d, *J* = 12.7 Hz, 1H), 3.56 (d, *J* = 12.7 Hz, 1H), 3.36 – 3.31 (m, 1H), 3.24 – 3.18 (m, 1H), 2.33 (s, 1H).

**<sup>13</sup>C NMR** (100 MHz, CDCl<sub>3</sub>) δ 172.2, 139.6, 139.4, 139.0, 132.4, 132.2 (q, *J* = 33.3 Hz), 129.0, 128.9, 128.04, 128.03, 127.7, 125.9, 123.0 (q, *J* = 271.2 Hz), 120.4, 119.0 – 118.9 (m), 117.3 – 117.2 (m), 67.8, 47.1, 36.8.

**<sup>19</sup>F NMR** (376 MHz, CDCl<sub>3</sub>) δ -62.99 (s, 6F).

**HRMS** (ESI) *m/z* calcd. for C<sub>26</sub>H<sub>23</sub>F<sub>6</sub>N<sub>2</sub>O [*M* + *H*]<sup>+</sup> 493.1709, found 493.1714.

**(*S*)-2-(Benzylamino)-*N*-(3,5-bis(trifluoromethyl)phenyl)-2-(4-(*tert*-butyl)phenyl)butanamide (**123**)**

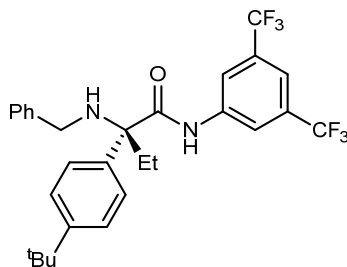

**123**

According to **General Procedure G** with *N*-(3,5-bis(trifluoromethyl)phenyl)-2-(4-(*tert*-butyl)phenyl)-2-chlorobutanamide **E25** (93.0 mg, 0.2 mmol, 1.0 equiv.) and benzylamine **A1** (25.7 mg, 0.24 mmol, 1.2 equiv.) for 7 d, the reaction mixture was purified by flash column chromatography on silica gel (petroleum ether/EtOAc = 30/1) to yield the product **123** as a

yellowish oil (71.9 mg, 67% yield, 87% e.e.).

**HPLC** analysis: Chiralcel ODH (*n*-hexane/*i*-PrOH = 80/20, flow rate 1.0 mL/min,  $\lambda$  = 254 nm),  $t_R$  (major) = 5.73 min,  $t_R$  (minor) = 8.15 min.

**$^1\text{H}$  NMR** (400 MHz,  $\text{CDCl}_3$ )  $\delta$  9.65 (s, 1H), 7.95 (s, 2H), 7.52 – 7.49 (m, 3H), 7.43 – 7.31 (m, 7H), 3.77 (d,  $J$  = 12.9 Hz, 1H), 3.54 (d,  $J$  = 12.9 Hz, 1H), 2.56 – 2.40 (m, 2H), 2.04 (s, 1H), 1.30 (s, 9H), 0.86 (t,  $J$  = 7.4 Hz, 3H).

**$^{13}\text{C}$  NMR** (100 MHz,  $\text{CDCl}_3$ )  $\delta$  173.0, 150.7, 139.5, 139.3, 136.8, 132.2 (q,  $J$  = 33.2 Hz), 128.9, 127.9, 127.6, 125.8, 125.5, 123.1 (q,  $J$  = 271.1 Hz), 118.81 – 118.77 (m), 117.1 – 117.0 (m), 68.5, 47.2, 34.4, 31.2, 24.7, 7.5.

**$^{19}\text{F}$  NMR** (376 MHz,  $\text{CDCl}_3$ )  $\delta$  -62.98 (s, 6F).

**HRMS** (ESI)  $m/z$  calcd. for  $\text{C}_{29}\text{H}_{31}\text{F}_6\text{N}_2\text{O}$   $[\text{M} + \text{H}]^+$  537.2335, found 537.2341.

**(*S*)-2-(Benzylamino)-*N*-(3,5-bis(trifluoromethyl)phenyl)-2-(3-methoxyphenyl)butanamide (124)**

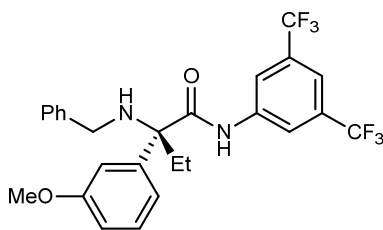

**124**

According to **General Procedure G** with *N*-(3,5-bis(trifluoromethyl)phenyl)-2-chloro-2-(3-methoxyphenyl)butanamide **E26** (87.8 mg, 0.2 mmol, 1.0 equiv.) and benzylamine **A1** (25.7 mg, 0.24 mmol, 1.2 equiv.) for 7 d, the reaction mixture was purified by flash column chromatography on silica gel (petroleum ether/EtOAc = 10/1) to yield the product **124** as a yellowish oil (80.7 mg, 79% yield, 92% e.e.).

**HPLC** analysis: Chiralcel ODH (*n*-hexane/*i*-PrOH = 80/20, flow rate 1.0 mL/min,  $\lambda$  = 254 nm),  $t_R$  (major) = 6.26 min,  $t_R$  (minor) = 10.43 min.

**$^1\text{H}$  NMR** (400 MHz,  $\text{CDCl}_3$ )  $\delta$  9.55 (s, 1H), 7.94 (s, 2H), 7.53 (s, 1H), 7.43 – 7.30 (m, 6H), 7.19 – 7.15 (m, 2H), 6.85 – 6.82 (m, 1H), 3.81 (s, 3H), 3.77 (d,  $J$  = 12.9 Hz, 1H), 3.55 (d,  $J$  = 12.9 Hz, 1H), 2.55 – 2.38 (m, 2H), 2.07 (s, 1H), 0.84 (t,  $J$  = 7.4 Hz, 3H).

**$^{13}\text{C}$  NMR** (100 MHz,  $\text{CDCl}_3$ )  $\delta$  172.6, 159.9, 141.7, 139.4, 139.2, 132.2 (q,  $J$  = 33.3 Hz), 129.9, 128.9, 127.9, 127.7, 123.0 (q,  $J$  = 271.1 Hz), 118.84 – 118.76 (m), 118.2, 117.2 – 117.0 (m), 112.7, 112.2, 68.7, 55.3, 47.2, 24.9, 7.4.

**$^{19}\text{F}$  NMR** (376 MHz,  $\text{CDCl}_3$ )  $\delta$  -62.99 (s, 6F).

**HRMS** (ESI)  $m/z$  calcd. for  $\text{C}_{26}\text{H}_{25}\text{F}_6\text{N}_2\text{O}_2$   $[\text{M} + \text{H}]^+$  511.1815, found 511.1823.

**(*S*)-2-(Benzylamino)-*N*-(3,5-bis(trifluoromethyl)phenyl)-2-(naphthalen-2-yl)butanamide (125)**

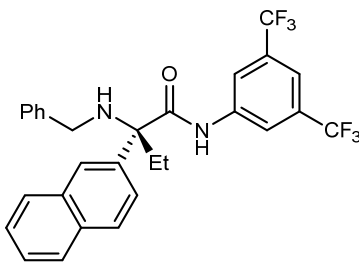

**125**

According to **General Procedure G** with *N*-(3,5-bis(trifluoromethyl)phenyl)-2-chloro-2-(naphthalen-2-yl)butanamide **E27** (92.0 mg, 0.2 mmol, 1.0 equiv.) and benzylamine **A1** (25.7 mg, 0.24 mmol, 1.2 equiv.) for 7 d, the reaction mixture was purified by flash column chromatography on silica gel (petroleum ether/EtOAc = 10/1) to yield the product **125** as a yellowish oil (70.0 mg, 66% yield, 87% e.e.).

**HPLC** analysis: Chiralcel ODH (*n*-hexane/*i*-PrOH = 80/20, flow rate 1.0 mL/min,  $\lambda$  = 254 nm),  $t_R$  (major) = 7.27 min,  $t_R$  (minor) = 8.99 min.

**$^1\text{H}$  NMR** (400 MHz,  $\text{CDCl}_3$ )  $\delta$  9.62 (s, 1H), 8.05 (s, 1H), 7.94 (s, 2H), 7.88 – 7.86 (m, 2H), 7.83 – 7.80 (m, 1H), 7.71 – 7.68 (m, 1H), 7.52 (s, 1H), 7.51 – 7.46 (m, 2H), 7.45 – 7.39 (m, 4H), 7.38 – 7.33 (m, 1H), 3.80 (d,  $J$  = 12.9 Hz, 1H), 3.60 (d,  $J$  = 12.8 Hz, 1H), 2.69 – 2.42 (m, 3H), 0.87 (t,  $J$  = 7.4 Hz, 3H).

**$^{13}\text{C}$  NMR** (100 MHz,  $\text{CDCl}_3$ )  $\delta$  172.6, 139.4, 139.2, 137.4, 133.2, 132.6, 132.2 (q,  $J$  = 33.3 Hz), 129.0, 128.8, 128.2, 128.0, 127.8, 127.5, 126.48, 126.46, 125.0, 123.6, 123.0 (q,  $J$  = 271.2 Hz), 119.0 – 118.8 (m), 117.2 – 117.1 (m), 69.0, 47.4, 25.0, 7.4.

**$^{19}\text{F}$  NMR** (376 MHz,  $\text{CDCl}_3$ )  $\delta$  -62.97 (s, 6F).

**HRMS** (ESI)  $m/z$  calcd. for  $\text{C}_{29}\text{H}_{25}\text{F}_6\text{N}_2\text{O}$  [ $\text{M} + \text{H}$ ] $^+$  531.1866, found 531.1872.

#### (*S*)-2-(Benzylamino)-*N*-(3,5-dibromophenyl)-2-phenylbutanamide (**126**)

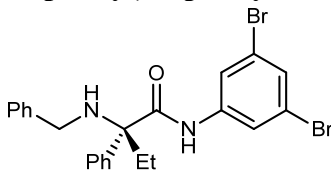

**126**

According to **General Procedure G** with 2-chloro-*N*-(3,5-dibromophenyl)-2-phenylbutanamide **E28** (86.3 mg, 0.2 mmol, 1.0 equiv.) and benzylamine **A1** (25.7 mg, 0.24 mmol, 1.2 equiv.) for 7 d, the reaction mixture was purified by flash column chromatography on silica gel (petroleum ether/EtOAc = 10/1) to yield the product **126** as a yellowish oil (54.2 mg, 54% yield, 92% e.e.).

**HPLC** analysis: Chiralcel IC (*n*-hexane/*i*-PrOH = 95/5, flow rate 0.8 mL/min,  $\lambda$  = 254 nm),  $t_R$  (major) = 7.70 min,  $t_R$  (minor) = 8.91 min.

**$^1\text{H}$  NMR** (400 MHz,  $\text{CDCl}_3$ )  $\delta$  9.34 (s, 1H), 7.62 (d,  $J$  = 1.7 Hz, 2H), 7.57 – 7.54 (m, 2H), 7.44 – 7.27 (m, 9H), 3.71 (d,  $J$  = 12.7 Hz, 1H), 3.52 (d,  $J$  = 12.8 Hz, 1H), 2.53 – 2.38 (m, 2H), 2.18 (s, 1H), 0.82 (t,  $J$  = 7.4 Hz, 3H).

**$^{13}\text{C}$  NMR** (100 MHz,  $\text{CDCl}_3$ )  $\delta$  172.3, 140.1, 139.9, 139.4, 129.3, 128.9, 128.8, 128.0, 127.7, 127.6, 125.8, 122.9, 120.7, 68.6, 47.2, 24.9, 7.4.

**HRMS** (ESI)  $m/z$  calcd. for  $\text{C}_{23}\text{H}_{23}\text{Br}_2\text{N}_2\text{O}$  [ $\text{M} + \text{H}$ ] $^+$  501.0172, found 501.0177.

#### (*S*)-2-(Benzylamino)-*N*-(4-bromophenyl)-2-phenylbutanamide (**127**)



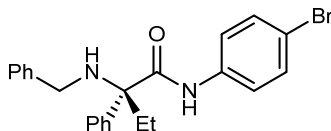

**127**

According to **General Procedure G** with *N*-(4-bromophenyl)-2-chloro-2-phenylbutanamide **E29** (70.5 mg, 0.2 mmol, 1.0 equiv.) and benzylamine **A1** (25.7 mg, 0.24 mmol, 1.2 equiv.) for 7 d, the reaction mixture was purified by flash column chromatography on silica gel (petroleum ether/EtOAc = 10/1) to yield the product **127** as a yellowish oil (43.2 mg, 51% yield, 90% e.e.).

**HPLC** analysis: Chiralcel IA (*n*-hexane/*i*-PrOH = 90/10, flow rate 1.0 mL/min,  $\lambda$  = 254 nm),  $t_R$  (major) = 12.21 min,  $t_R$  (minor) = 14.97 min.

**$^1\text{H}$  NMR** (400 MHz,  $\text{CDCl}_3$ )  $\delta$  9.33 (s, 1H), 7.59 – 7.57 (m, 2H), 7.43 – 7.31 (m, 11H), 7.29 – 7.25 (m, 1H), 3.69 (d,  $J$  = 12.7 Hz, 1H), 3.53 (d,  $J$  = 12.7 Hz, 1H), 2.53 – 2.37 (m, 2H), 2.15 (s, 1H), 0.83 (t,  $J$  = 7.4 Hz, 3H).

**$^{13}\text{C}$  NMR** (100 MHz,  $\text{CDCl}_3$ )  $\delta$  172.0, 140.5, 139.6, 136.9, 131.8, 128.8, 128.7, 128.0, 127.5, 125.9, 120.8, 116.4, 68.5, 47.2, 25.0, 7.4.

**HRMS** (ESI)  $m/z$  calcd. for  $\text{C}_{23}\text{H}_{24}\text{BrN}_2\text{O}$  [ $\text{M} + \text{H}$ ] $^+$  423.1067, found 423.1070.

**(S)-2-(Benzylamino)-N-(4-(methylsulfonyl)phenyl)-2-phenylbutanamide (128)**

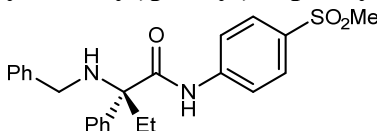

**128**

According to **General Procedure G** with 2-chloro-*N*-(4-(methylsulfonyl)phenyl)-2-phenylbutanamide **E30** (70.2 mg, 0.2 mmol, 1.0 equiv.) and benzylamine **A1** (25.7 mg, 0.24 mmol, 1.2 equiv.) for 7 d, the reaction mixture was purified by preparative thin-layer chromatography on silica gel (DCM/EtOAc = 20/1) to yield the product **128** as a yellowish solid (46.5 mg, 55% yield, 91% e.e.).

**HPLC** analysis: Chiralcel IG (*n*-hexane/*i*-PrOH = 50/50, flow rate 0.6 mL/min,  $\lambda$  = 254 nm),  $t_R$  (major) = 29.13 min,  $t_R$  (minor) = 45.94 min.

**$^1\text{H}$  NMR** (400 MHz,  $\text{CDCl}_3$ )  $\delta$  9.62 (s, 1H), 7.83 – 7.81 (m, 2H), 7.68 – 7.65 (m, 2H), 7.59 – 7.58 (m, 2H), 7.44 – 7.26 (m, 8H), 3.74 (d,  $J$  = 12.8 Hz, 1H), 3.54 (d,  $J$  = 12.8 Hz, 1H), 2.98 (s, 3H), 2.55 – 2.38 (m, 2H), 2.23 (s, 1H), 0.84 (t,  $J$  = 7.3 Hz, 3H).

**$^{13}\text{C}$  NMR** (100 MHz,  $\text{CDCl}_3$ )  $\delta$  172.6, 142.6, 140.0, 139.3, 134.9, 128.8, 128.7, 128.6, 127.9, 127.7, 127.6, 125.8, 119.1, 68.7, 47.3, 44.6, 25.0, 7.3.

**HRMS** (ESI)  $m/z$  calcd. for  $\text{C}_{24}\text{H}_{27}\text{N}_2\text{O}_3\text{S}$  [ $\text{M} + \text{H}$ ] $^+$  423.1737, found 423.1738.

**(S)-N-(3,5-Bis(trifluoromethyl)phenyl)-1-ethyl-2-phenylpyrrolidine-2-carboxamide (129)**

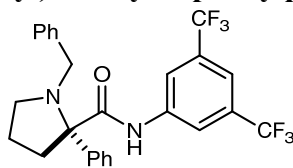

**129**

According to **General Procedure G** with *N*-(3,5-bis(trifluoromethyl)phenyl)-2,5-dichloro-2-

phenylpentanamide **E31** (91.6 mg, 0.2 mmol, 1.0 equiv.) and benzylamine **A1** (25.7 mg, 0.24 mmol, 1.2 equiv.) for 7 d, the reaction mixture was purified by flash column chromatography on silica gel (petroleum ether/EtOAc = 10/1) to yield the product **129** as a yellowish oil (51.2 mg, 52% yield, 87% e.e.).

**HPLC** analysis: Chiralcel IG (*n*-hexane/*i*-PrOH = 99/1, flow rate 0.6 mL/min,  $\lambda$  = 254 nm),  $t_R$  (major) = 9.55 min,  $t_R$  (minor) = 11.07 min.

**<sup>1</sup>H NMR** (400 MHz, CDCl<sub>3</sub>)  $\delta$  10.57 (s, 1H), 8.11 (s, 2H), 7.61 (s, 1H), 7.45 – 7.30 (m, 8H), 7.24 – 7.23 (m, 2H), 3.57 (d,  $J$  = 13.7 Hz, 1H), 3.27 (t,  $J$  = 8.3 Hz, 1H), 2.87 (d,  $J$  = 13.7 Hz, 1H), 2.81 – 2.70 (m, 3H), 2.10 – 2.04 (m, 1H), 1.98 – 1.86 (m, 1H).

**<sup>13</sup>C NMR** (100 MHz, CDCl<sub>3</sub>)  $\delta$  174.2, 139.3, 138.3, 132.4 (q,  $J$  = 33.1 Hz), 128.9, 128.43, 128.36, 128.3, 127.8, 127.6, 123.1 (q,  $J$  = 271.1 Hz), 118.70 – 118.67 (m), 117.3 – 117.1 (m), 76.8, 55.9, 53.0, 39.3, 23.2.

**<sup>19</sup>F NMR** (376 MHz, CDCl<sub>3</sub>)  $\delta$  -62.94 (s, 6F).

**HRMS** (ESI)  $m/z$  calcd. for C<sub>26</sub>H<sub>23</sub>F<sub>6</sub>N<sub>2</sub>O [ $M + H$ ]<sup>+</sup> 493.1709, found 493.1715.

### (*S*)-2-Amino-*N*-(3,5-bis(trifluoromethyl)phenyl)-2-phenylbutanamide (**130**)

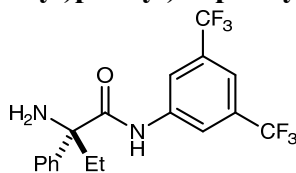

**130**

According to **General Procedure G** with *N*-(3,5-bis(trifluoromethyl)phenyl)-2-chloro-2-phenylbutanamide **E22** (82.0 mg, 0.20 mmol, 1.0 equiv.), Ammonia **A43** (1.50 mL, 0.60 mmol, 3.0 equiv., 0.4 M in 1,4-dioxane), CuBH<sub>4</sub>(PPh<sub>3</sub>)<sub>2</sub> (12.0 mg, 0.02 mmol, 10 mol%), and anhydrous Et<sub>2</sub>O (4.0 mL). for 96 h, the reaction mixture was purified by column chromatography on silica gel (petroleum ether/EtOAc = 5/1) to yield the product **130** (39.5 mg, 51% yield, 85% e.e.).

**HPLC** analysis: Chiralcel ODH (*n*-hexane/*i*-PrOH = 80/20, flow rate 1.0 mL/min,  $\lambda$  = 254 nm),  $t_R$  (major) = 5.04 min,  $t_R$  (minor) = 8.38 min.

**<sup>1</sup>H NMR** (400 MHz, CDCl<sub>3</sub>)  $\delta$  10.24 (s, 1H), 8.11 (s, 2H), 7.58 – 7.55 (m, 3H), 7.40 – 7.36 (m, 2H), 7.32 – 7.28 (m, 1H), 2.37 (dq,  $J$  = 14.8, 7.4 Hz, 1H), 2.27 (dq,  $J$  = 14.5, 7.4 Hz, 1H), 1.94 (s, 2H), 0.95 (t,  $J$  = 7.4 Hz, 3H).

**<sup>13</sup>C NMR** (100 MHz, CDCl<sub>3</sub>)  $\delta$  173.7, 141.9, 139.2, 132.2 (q,  $J$  = 33.2 Hz), 128.8, 127.8, 125.3, 123.1 (q,  $J$  = 271.1 Hz), 118.93 – 118.90 (m), 117.2 – 117.1 (m), 64.1, 32.3, 8.1.

**<sup>19</sup>F NMR** (376 MHz, CDCl<sub>3</sub>)  $\delta$  -62.98 (s, 6F).

**HRMS** (ESI)  $m/z$  calcd. for C<sub>18</sub>H<sub>17</sub>F<sub>6</sub>N<sub>2</sub>O [ $M + H$ ]<sup>+</sup> 391.1240, found 391.1243.

### 4-Chlorobutyl (*S*)-4-(2-(benzylamino)propanamido)benzoate (**131**)

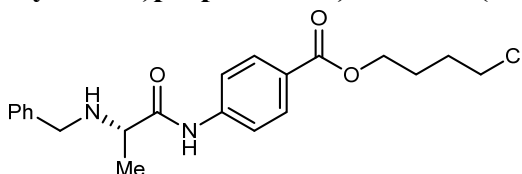

**131**

According to **General Procedure A** with 4-chlorobutyl 4-(2-chloropropanamido)benzoate **E32**

(95.1 mg, 0.30 mmol, 1.5 equiv.) and benzylamine **A1** (21.4 mg, 0.20 mmol, 1.0 equiv.) for 72 h, the reaction mixture was purified by flash column chromatography on silica gel (petroleum ether/EtOAc = 1/2) to yield the product **131** (69.2 mg, 89% yield, 90% e.e.).

**HPLC** analysis: Chiralcel IC (*n*-hexane/*i*-PrOH = 80/20, flow rate 1.0 mL/min,  $\lambda$  = 254 nm),  $t_R$  (major) = 12.98 min,  $t_R$  (minor) = 15.05 min.

**$^1\text{H}$  NMR** (400 MHz,  $\text{CDCl}_3$ )  $\delta$  9.62 (s, 1H), 8.02 – 7.99 (m, 2H), 7.66 – 7.63 (m, 2H), 7.38 – 7.26 (m, 5H), 4.35 – 4.30 (m, 2H), 3.82 (s, 2H), 3.62 – 3.59 (m, 2H), 3.37 (q,  $J$  = 7.0 Hz, 1H), 1.95 – 1.92 (m, 4H), 1.80 (s, 1H), 1.41 (d,  $J$  = 7.0 Hz, 3H).

**$^{13}\text{C}$  NMR** (100 MHz,  $\text{CDCl}_3$ )  $\delta$  173.3, 166.0, 141.9, 139.0, 130.7, 128.7, 127.9, 127.5, 125.3, 118.4, 63.9, 58.4, 52.8, 44.4, 29.2, 26.1, 19.5.

**HRMS** (ESI)  $m/z$  calcd. for  $\text{C}_{21}\text{H}_{26}\text{ClN}_2\text{O}_3$   $[\text{M} + \text{H}]^+$  389.1626, found 389.1626.

### (*S*)-*N*-Benzyl-2-(benzylamino)propanamide (**132**)

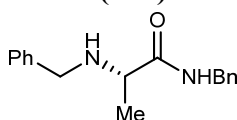

**132**

According to **General Procedure A** with *N*-benzyl-2-chloropropanamide **E33** (59.1 mg, 0.30 mmol, 1.5 equiv.) and benzylamine **A1** (21.4 mg, 0.20 mmol, 1.0 equiv.) for 72 h, the reaction mixture was purified by preparative thin-layer chromatography on silica gel (EtOAc) to yield the product **132** as a colorless oil (30.1 mg, 56% yield, 82% e.e.).

**HPLC** analysis: Chiralcel OD (*n*-hexane/*i*-PrOH = 90/10, flow rate 0.8 mL/min,  $\lambda$  = 214 nm),  $t_R$  (minor) = 18.12 min,  $t_R$  (major) = 20.28 min.

**$^1\text{H}$  NMR** (400 MHz,  $\text{CDCl}_3$ )  $\delta$  7.61 (s, 1H), 7.36 – 7.20 (m, 10H), 4.45 (d,  $J$  = 5.9 Hz, 2H), 3.73 (s, 2H), 3.31 (q,  $J$  = 6.9 Hz, 1H), 1.71 (s, 1H), 1.36 (d,  $J$  = 6.9 Hz, 3H).

**$^{13}\text{C}$  NMR** (100 MHz,  $\text{CDCl}_3$ )  $\delta$  174.6, 139.3, 138.5, 128.7, 128.6, 128.0, 127.6, 127.4, 127.3, 57.9, 52.7, 43.0, 19.8.

**HRMS** (ESI)  $m/z$  calcd. for  $\text{C}_{17}\text{H}_{21}\text{N}_2\text{O}$   $[\text{M} + \text{H}]^+$  269.1648, found 269.1642.

### (*S*)-*N*-Benzyl-2-(diethylamino)propanamide (**133**)

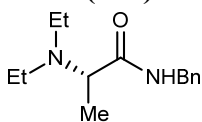

**133**

According to **General Procedure C** with *N*-benzyl-2-chloropropanamide **E33** (59.1 mg, 0.30 mmol, 1.5 equiv.) and diethylamine **A51** (14.6 mg, 0.20 mmol, 1.0 equiv.) for 96 h, the reaction mixture was purified by preparative thin-layer chromatography on silica gel (EtOAc/ $\text{CH}_3\text{OH}$  = 20/1) to yield the product **133** as a colorless oil (29.7 mg, 63% yield, 84% e.e.).

**HPLC** analysis: Chiralcel IH (*n*-hexane/*i*-PrOH = 90/10, flow rate 1.0 mL/min,  $\lambda$  = 214 nm),  $t_R$  (major) = 8.84 min,  $t_R$  (minor) = 13.75 min.

**$^1\text{H}$  NMR** (400 MHz,  $\text{CDCl}_3$ )  $\delta$  7.80 (s, 1H), 7.36 – 7.31 (m, 2H), 7.28 – 7.24 (m, 3H), 4.53 – 4.48 (m, 1H), 4.41 – 4.36 (m, 1H), 3.42 (q,  $J$  = 6.7 Hz, 1H), 2.59 – 2.50 (m, 2H), 2.47 – 2.38 (m, 2H), 1.24 (d,  $J$  = 7.1 Hz, 3H), 0.99 (t,  $J$  = 7.1 Hz, 6H).

**$^{13}\text{C}$  NMR** (100 MHz,  $\text{CDCl}_3$ )  $\delta$  174.8, 138.7, 128.6, 127.5, 127.2, 59.3, 44.0, 43.1, 13.2, 9.5.

**HRMS** (ESI)  $m/z$  calcd. for  $\text{C}_{14}\text{H}_{23}\text{N}_2\text{O}$   $[\text{M} + \text{H}]^+$  235.1805, found 235.1801.

**(S)-N-Benzyl-2-morpholinopropanamide (134)**

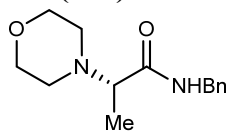

**134**

According to **General Procedure C** with *N*-benzyl-2-chloropropanamide **E33** (59.1 mg, 0.30 mmol, 1.5 equiv.) and morpholine **A89** (17.4 mg, 0.20 mmol, 1.0 equiv.) for 96 h, the reaction mixture was purified by preparative thin-layer chromatography on silica gel (EtOAc) to yield the product **134** as a colorless oil (33.2 mg, 67% yield, 94% e.e.).

**HPLC** analysis: Chiralcel OD3 (*n*-hexane/*i*-PrOH = 95/5, flow rate 1.0 mL/min,  $\lambda$  = 214 nm),  $t_R$  (minor) = 29.14 min,  $t_R$  (major) = 30.37 min.

**$^1\text{H}$  NMR** (400 MHz,  $\text{CDCl}_3$ )  $\delta$  7.69 – 7.44 (m, 1H), 7.36 – 7.32 (m, 2H), 7.30 – 7.25 (m, 3H), 4.51 – 4.41 (m, 2H), 3.73 – 3.64 (m, 4H), 3.11 (q,  $J$  = 7.3 Hz, 1H), 2.61 – 2.48 (m, 4H), 1.29 (d,  $J$  = 7.0 Hz, 3H).

**$^{13}\text{C}$  NMR** (100 MHz,  $\text{CDCl}_3$ )  $\delta$  173.1, 138.4, 128.6, 127.5, 127.4, 66.8, 64.4, 50.2, 43.0, 12.3.

**HRMS** (ESI)  $m/z$  calcd. for  $\text{C}_{14}\text{H}_{21}\text{N}_2\text{O}_2$   $[\text{M} + \text{H}]^+$  249.1598, found 249.1595.

***tert*-Butyl diethyl-*L*-alanylglycinate (135)**

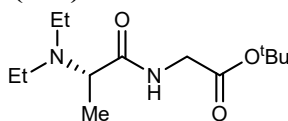

**135**

According to **General Procedure E** with *tert*-butyl (2-chloropropanoyl)glycinate **E4** (66.3 mg, 0.30 mmol, 1.5 equiv.) and diethylamine **A51** (14.6 mg, 0.20 mmol, 1.0 equiv.) for 96 h, the reaction mixture was purified by preparative thin-layer chromatography on silica gel (EtOAc/ $\text{CH}_3\text{OH}$  = 15/1) to yield the product **135** as a colorless oil (40.3 mg, 78% yield, 98% e.e.).

**HPLC** analysis: Chiralcel IC (*n*-hexane/*i*-PrOH = 95/5, flow rate 0.8 mL/min,  $\lambda$  = 214 nm),  $t_R$  (major) = 51.08 min,  $t_R$  (minor) = 55.26 min.

According to **General Procedure E** with *tert*-butyl (2-chloropropanoyl)glycinate **E4** (44.2 mg, 0.20 mmol, 1.0 equiv.) and diethylamine **A51** (14.6 mg, 0.20 mmol, 1.0 equiv.) for 96 h, the reaction mixture was purified by preparative thin-layer chromatography on silica gel (EtOAc/ $\text{CH}_3\text{OH}$  = 15/1) to yield the product **135** as a colorless oil (49.9 mg, 97% yield, 92% e.e.).

**$^1\text{H}$  NMR** (400 MHz,  $\text{CDCl}_3$ )  $\delta$  7.91 (s, 1H), 4.03 – 3.85 (m, 2H), 3.39 (q,  $J$  = 7.0 Hz, 1H), 2.58 (dq,  $J$  = 12.8, 7.3 Hz, 2H), 2.44 (dq,  $J$  = 13.6, 6.9 Hz, 2H), 1.48 (s, 9H), 1.20 (d,  $J$  = 7.0 Hz, 3H), 1.07 (t,  $J$  = 7.1 Hz, 6H).

**$^{13}\text{C}$  NMR** (100 MHz,  $\text{CDCl}_3$ )  $\delta$  175.1, 169.0, 81.8, 59.0, 43.9, 41.7, 28.0, 13.3, 9.2.

**HRMS** (ESI)  $m/z$  calcd. for  $\text{C}_{13}\text{H}_{27}\text{N}_2\text{O}_3$   $[\text{M} + \text{H}]^+$  259.2016, found 259.2011.

**(S)-2-((*R*)-8-Chloro-1-methyl-1,2,4,5-tetrahydro-3*H*-benzo[d]azepin-3-yl)-*N*-(4-((4-methylpiperazin-1-yl)methyl)-3-(trifluoromethyl)phenyl)propanamide (136)**

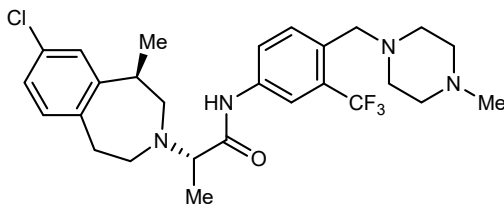

136

According to **General Procedure C** with 2-chloro-*N*-(4-((4-methylpiperazin-1-yl)methyl)-3-(trifluoromethyl)phenyl)propanamide **E34** (108.9 mg, 0.30 mmol, 1.5 equiv.), lorcaserin hydrochloride **A99** (46.2 mg, 0.20 mmol, 1.0 equiv.), and Cs<sub>2</sub>CO<sub>3</sub> (260.6 mg, 0.80 mmol, 4.0 equiv.) for 96 h, the reaction mixture was purified by preparative thin-layer chromatography on silica gel (CH<sub>2</sub>Cl<sub>2</sub>/CH<sub>3</sub>OH = 15/1) to yield the product **136** as a colorless oil (79.6 mg, 76% yield, >20:1 d.r.).

**<sup>1</sup>H NMR** (400 MHz, CDCl<sub>3</sub>) δ 9.28 (s, 1H), 7.80 (d, *J* = 2.3 Hz, 1H), 7.65 – 7.62 (m, 1H), 7.55 – 7.52 (m, 1H), 7.19 – 7.15 (m, 2H), 7.08 – 7.05 (m, 1H), 3.66 (s, 2H), 3.46 (q, *J* = 7.0 Hz, 1H), 3.20 – 3.12 (m, 1H), 3.04 – 3.03 (m, 1H), 2.99 – 2.91 (m, 1H), 2.89 – 2.68 (m, 11H), 2.54 – 2.47 (m, 4H), 1.39 (d, *J* = 7.1 Hz, 3H), 1.26 (d, *J* = 7.0 Hz, 3H).

**<sup>13</sup>C NMR** (100 MHz, CDCl<sub>3</sub>) δ 171.8, 145.9, 138.2, 136.8, 132.3, 131.8, 131.4, 130.6, 129.3 (q, *J* = 30.3 Hz), 126.5, 126.2, 123.9 (q, *J* = 272.7 Hz), 121.7, 116.3 (q, *J* = 6.0 Hz), 65.6, 57.5, 57.4, 54.5, 51.3, 44.8, 38.7, 35.1, 29.2, 17.8, 9.2.

**<sup>19</sup>F NMR** (376 MHz, CDCl<sub>3</sub>) δ -59.29 (s, 3F).

**HRMS** (ESI) *m/z* calcd. for C<sub>27</sub>H<sub>35</sub>ClF<sub>3</sub>N<sub>4</sub>O [M + H]<sup>+</sup> 523.2446, found 523.2450.

#### (*S*)-2-((3-Phenylpropyl)amino)propanamide (**137**)

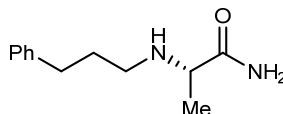

137

According to **General Procedure A** with 2-chloropropanamide **E6** (21.4 mg, 0.20 mmol, 1.0 equiv.), 3-phenylpropan-1-amine **A13** (40.5 mg, 0.30 mmol, 1.5 equiv.), and **L\*5** (15.8 mg, 0.03 mmol, 15 mol%), for 72 h, the reaction mixture was purified by preparative thin-layer chromatography on silica gel (EtOAc/CH<sub>3</sub>OH = 10/1) to yield the product **137** as a white solid (16.8 mg, 41% yield, 93% e.e.).

**HPLC** analysis: Chiralcel OD3 (*n*-hexane/*i*-PrOH = 80/20, flow rate 0.8 mL/min, λ = 214 nm), *t<sub>R</sub>* (minor) = 9.67 min, *t<sub>R</sub>* (major) = 14.88 min.

**<sup>1</sup>H NMR** (400 MHz, CDCl<sub>3</sub>) δ 7.31 – 7.26 (m, 2H), 7.21 – 7.16 (m, 3H), 7.04 (s, 1H), 5.49 (s, 1H), 3.14 (q, *J* = 7.0 Hz, 1H), 2.73 – 2.56 (m, 4H), 1.85 – 1.77 (m, 2H), 1.58 (s, 1H), 1.31 (d, *J* = 7.0 Hz, 3H).

**<sup>13</sup>C NMR** (100 MHz, CDCl<sub>3</sub>) δ 178.2, 141.7, 128.4, 128.3, 125.9, 58.4, 48.2, 33.5, 31.7, 19.7.

**HRMS** (ESI) *m/z* calcd. for C<sub>12</sub>H<sub>19</sub>N<sub>2</sub>O [M + H]<sup>+</sup> 207.1492, found 207.1491.

#### (*S*)-2-(Diethylamino)propanamide (**138**)

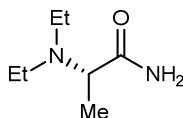

**138**

According to **General Procedure E** with 2-chloropropanamide **E6** (32.1 mg, 0.30 mmol, 1.5 equiv.) and diethylamine **A51** (14.6 mg, 0.20 mmol, 1.0 equiv.) for 96 h, the reaction mixture was purified by preparative thin-layer chromatography on silica gel (EtOAc/CH<sub>3</sub>OH = 10/1) to yield the product **138** as a white solid (25.1 mg, 87% yield, 88% e.e.).

**HPLC** analysis: Chiralcel IG (*n*-hexane/*i*-PrOH = 90/10, flow rate 0.9 mL/min,  $\lambda$  = 214 nm),  $t_R$  (major) = 39.92 min,  $t_R$  (minor) = 49.83 min.

**<sup>1</sup>H NMR** (400 MHz, CDCl<sub>3</sub>)  $\delta$  7.28 (s, 1H), 6.03 (s, 1H), 3.37 (q,  $J$  = 7.0 Hz, 1H), 2.61 – 2.52 (m, 2H), 2.46 – 2.38 (m, 2H), 1.19 (d,  $J$  = 7.0 Hz, 3H), 1.04 (t,  $J$  = 7.1 Hz, 6H).

**<sup>13</sup>C NMR** (100 MHz, CDCl<sub>3</sub>)  $\delta$  178.4, 59.0, 44.0, 13.4, 8.9.

**HRMS** (ESI)  $m/z$  calcd. for C<sub>7</sub>H<sub>17</sub>N<sub>2</sub>O [M + H]<sup>+</sup> 145.1335, found 145.1334.

**(S)-2-(Diethylamino)-N-(4-methoxyphenyl)butanamide (139)**

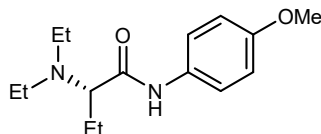

**139**

According to **General Procedure E** with 2-chloro-*N*-(4-methoxyphenyl)butanamide **E35** (68.1 mg, 0.30 mmol, 1.5 equiv.) and diethylamine **A51** (14.6 mg, 0.20 mmol, 1.0 equiv.) for 96 h, the reaction mixture was purified by preparative thin-layer chromatography on silica gel (EtOAc/CH<sub>3</sub>OH = 50/1) to yield the product **139** as a colorless oil (38.3 mg, 72% yield, 97% e.e.).

**HPLC** analysis: Chiralcel IG (*n*-hexane/*i*-PrOH = 80/20, flow rate 1.0 mL/min,  $\lambda$  = 254 nm),  $t_R$  (major) = 12.28 min,  $t_R$  (minor) = 15.09 min.

**<sup>1</sup>H NMR** (400 MHz, CDCl<sub>3</sub>)  $\delta$  9.39 (s, 1H), 7.50 – 7.46 (m, 2H), 6.88 – 6.84 (m, 2H), 3.79 (s, 3H), 3.23 (dd,  $J$  = 7.8, 4.9 Hz, 1H), 2.76 – 2.68 (m, 2H), 2.66 – 2.57 (m, 2H), 1.97 – 1.86 (m, 1H), 1.76 – 1.66 (m, 1H), 1.12 – 1.07 (m, 9H).

**<sup>13</sup>C NMR** (100 MHz, CDCl<sub>3</sub>)  $\delta$  172.0, 156.0, 131.3, 120.7, 114.1, 66.5, 55.4, 44.3, 19.6, 13.1, 12.7.

**HRMS** (ESI)  $m/z$  calcd. for C<sub>15</sub>H<sub>25</sub>N<sub>2</sub>O<sub>2</sub> [M + H]<sup>+</sup> 265.1911, found 265.1907.

**(S)-2-(Diethylamino)-N-(4-(trifluoromethyl)phenyl)butanamide (140)**

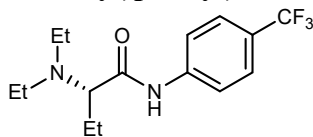

**140**

According to **General Procedure E** with 2-chloro-*N*-(4-(trifluoromethyl)phenyl)butanamide **E36** (79.5 mg, 0.30 mmol, 1.5 equiv.) and diethylamine **A51** (14.6 mg, 0.20 mmol, 1.0 equiv.) for 96 h, the reaction mixture was purified by flash column chromatography on silica gel (petroleum ether/EtOAc = 1/2) to yield the product **140** as a colorless oil (33.6 mg, 56% yield, 95%

e.e.).

**HPLC** analysis: Chiralcel IG (*n*-hexane/*i*-PrOH = 95/5, flow rate 1.0 mL/min,  $\lambda$  = 254 nm),  $t_R$  (major) = 8.20 min,  $t_R$  (minor) = 9.33 min.

**$^1\text{H}$  NMR** (400 MHz,  $\text{CDCl}_3$ )  $\delta$  9.67 (s, 1H), 7.69 – 7.67 (m, 2H), 7.58 – 7.56 (m, 2H), 3.22 (dd,  $J$  = 7.7, 4.9 Hz, 1H), 2.74 – 2.65 (m, 2H), 2.64 – 2.55 (m, 2H), 1.96 – 1.85 (m, 1H), 1.77 – 1.66 (m, 1H), 1.13 – 1.08 (m, 9H).

**$^{13}\text{C}$  NMR** (100 MHz,  $\text{CDCl}_3$ )  $\delta$  173.3, 141.0, 126.2 (q,  $J$  = 3.8 Hz), 125.4 (q,  $J$  = 32.7 Hz), 124.2 (q,  $J$  = 269.7 Hz), 118.6, 66.6, 44.4, 19.4, 13.4, 12.9.

**$^{19}\text{F}$  NMR** (376 MHz,  $\text{CDCl}_3$ )  $\delta$  -62.02 (s, 3F).

**HRMS** (ESI)  $m/z$  calcd. for  $\text{C}_{15}\text{H}_{22}\text{F}_3\text{N}_2\text{O}$  [ $\text{M} + \text{H}$ ] $^+$  303.1679, found 303.1675.

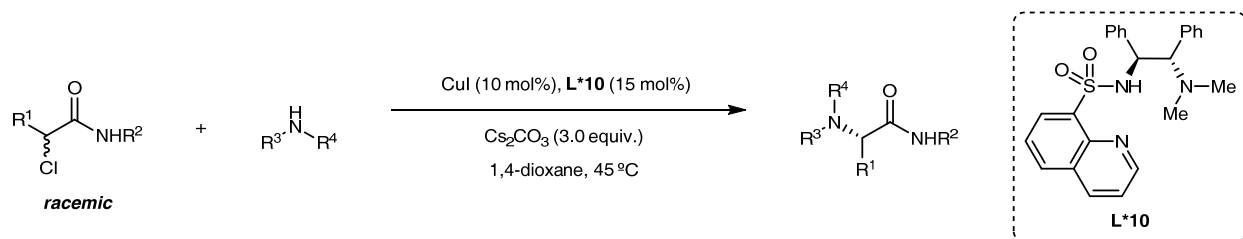

### General procedure H:

Under argon atmosphere, an oven-dried resealable Schlenk tube equipped with a magnetic stir bar was charged with  $\text{CuI}$  (3.8 mg, 0.02 mmol, 10 mol%),  $\text{L}^*\mathbf{10}$  (12.9 mg, 0.03 mmol, 15 mol%),  $\text{Cs}_2\text{CO}_3$  (195.5 mg, 0.60 mmol, 3.0 equiv.), and anhydrous 1,4-dioxane (2.0 mL). Then, the mixture was stirred at room temperature for 1 h. After that,  $\alpha$ -alkyl secondary alkyl chloride (0.30 mmol, 1.5 equiv.), alkyl amine (0.20 mmol, 1.0 equiv.), and anhydrous 1,4-dioxane (2.0 mL) were sequentially added into the mixture and the reaction mixture was stirred at 45 °C for 72 h. Upon completion (monitored by TLC), the precipitate was filtered off and washed by EtOAc. The filtrate was evaporated and the residue was purified by flash column chromatography or preparative thin-layer chromatography on silica gel to afford the desired product.

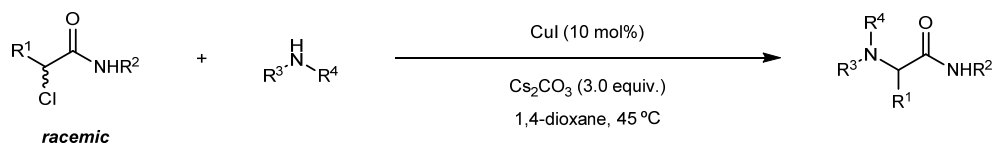

The racemates of products were prepared following the procedure: Under argon atmosphere, an oven-dried resealable Schlenk tube equipped with a magnetic stir bar was charged with  $\text{CuI}$  (3.8 mg, 0.02 mmol, 10 mol%),  $\text{Cs}_2\text{CO}_3$  (195.5 mg, 0.60 mmol, 3.0 equiv.),  $\alpha$ -alkyl secondary alkyl chloride (0.30 mmol, 1.5 equiv.), alkyl amine (0.20 mmol, 1.0 equiv.), and anhydrous 1,4-dioxane (4.0 mL) were sequentially added into the mixture and the reaction mixture was stirred at 45 °C for 72 or 96 h. Upon completion (monitored by TLC), the precipitate was filtered off and washed by EtOAc. The filtrate was evaporated and the residue was purified by flash column chromatography or preparative thin-layer chromatography on silica gel to afford the desired product.

### (*S*)-2-(Benzylamino)-*N*-phenylbutanamide (**141**)

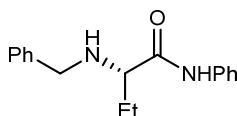

**141**

According to **General Procedure H** with 2-chloro-*N*-phenylbutanamide **E7** (78.8 mg, 0.40 mmol, 2.0 equiv.) and benzylamine **A1** (21.4 mg, 0.20 mmol, 1.0 equiv.) for 72 h, the reaction mixture was purified by flash column chromatography on silica gel (petroleum ether/EtOAc = 2/1) to yield the product **141** as a colorless oil (45.6 mg, 85% yield, 92% e.e.).

**HPLC** analysis: Chiralcel IC (*n*-hexane/*i*-PrOH = 93/7, flow rate 1.0 mL/min,  $\lambda$  = 254 nm),  $t_R$  (major) = 12.27 min,  $t_R$  (minor) = 16.37 min.

**$^1\text{H}$  NMR** (400 MHz,  $\text{CDCl}_3$ )  $\delta$  9.37 (s, 1H), 7.60 – 7.56 (m, 2H), 7.38 – 7.26 (m, 7H), 7.12 – 7.07 (m, 1H), 3.79 (q,  $J$  = 13.1 Hz, 2H), 3.21 (dd,  $J$  = 7.4, 5.0 Hz, 1H), 1.92 – 1.65 (m, 3H), 0.98 (t,  $J$  = 7.5 Hz, 3H).

**$^{13}\text{C}$  NMR** (100 MHz,  $\text{CDCl}_3$ )  $\delta$  172.3, 139.2, 137.7, 128.9, 128.7, 128.0, 127.4, 124.0, 119.3, 64.3, 53.0, 26.6, 10.2.

**HRMS** (ESI)  $m/z$  calcd. for  $\text{C}_{17}\text{H}_{21}\text{N}_2\text{O}$  [ $\text{M} + \text{H}$ ] $^+$  269.1648, found 269.1646.

#### (*S*)-2-morpholino-*N*-phenylbutanamide (**142**)

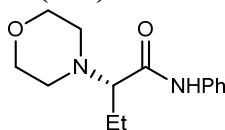

**142**

According to **General Procedure H** with 2-chloro-*N*-phenylbutanamide **E7** (59.1 mg, 0.30 mmol, 1.5 equiv.) and morpholine **A89** (17.4 mg, 0.20 mmol, 1.0 equiv.) for 72 h, the reaction mixture was purified by flash column chromatography on silica gel (petroleum ether/EtOAc = 1/1) to yield the product **142** as a colorless oil (49.5 mg, 99% yield, 96% e.e.).

**HPLC** analysis: Chiralcel OD3 (*n*-hexane/*i*-PrOH = 95/5, flow rate 0.8 mL/min,  $\lambda$  = 254 nm),  $t_R$  (major) = 18.62 min,  $t_R$  (minor) = 20.86 min.

**$^1\text{H}$  NMR** (400 MHz,  $\text{CDCl}_3$ )  $\delta$  8.90 (s, 1H), 7.57 – 7.54 (m, 2H), 7.35 – 7.30 (m, 2H), 7.13 – 7.08 (m, 1H), 3.81 – 3.72 (m, 4H), 2.90 (dd,  $J$  = 7.5, 5.0 Hz, 1H), 2.69 – 2.55 (m, 4H), 1.90 – 1.72 (m, 2H), 1.03 (t,  $J$  = 7.5 Hz, 3H).

**$^{13}\text{C}$  NMR** (100 MHz,  $\text{CDCl}_3$ )  $\delta$  170.9, 137.6, 129.0, 124.1, 119.3, 71.4, 67.2, 50.9, 21.2, 10.8.

**HRMS** (ESI)  $m/z$  calcd. for  $\text{C}_{14}\text{H}_{21}\text{N}_2\text{O}_2$  [ $\text{M} + \text{H}$ ] $^+$  249.1598, found 249.1596.

#### (*S*)-2-(benzylamino)-*N*-phenylhexanamide (**143**)

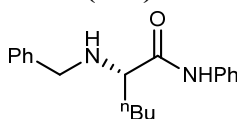

**143**

According to **General Procedure H** with 2-chloro-*N*-phenylhexanamide **E8** (90.0 mg, 0.40 mmol, 2.0 equiv.) and benzylamine **A1** (21.4 mg, 0.20 mmol, 1.0 equiv.) for 72 h, the reaction mixture was purified by flash column chromatography on silica gel (petroleum ether/EtOAc = 5/1) to yield the product **143** as a colorless oil (57.8 mg, 98% yield, 90% e.e.).

**HPLC** analysis: Chiralcel IC (*n*-hexane/*i*-PrOH = 90/10, flow rate 1.0 mL/min,  $\lambda$  = 254 nm),  $t_R$



(major) = 8.61 min,  $t_R$  (minor) = 11.40 min.

**$^1\text{H}$  NMR** (400 MHz,  $\text{CDCl}_3$ )  $\delta$  9.41 (s, 1H), 7.60 – 7.57 (m, 2H), 7.38 – 7.26 (m, 7H), 7.12 – 7.07 (m, 1H), 3.84 – 3.73 (m, 2H), 3.26 (dd,  $J$  = 7.8, 4.9 Hz, 1H), 2.05 (s, 1H), 1.88 – 1.79 (m, 1H), 1.69 – 1.60 (m, 1H), 1.40 – 1.25 (m, 4H), 0.88 (t,  $J$  = 7.1 Hz, 3H).

**$^{13}\text{C}$  NMR** (100 MHz,  $\text{CDCl}_3$ )  $\delta$  172.4, 139.0, 137.7, 128.9, 128.6, 128.1, 127.4, 123.9, 119.3, 63.1, 53.0, 33.3, 27.9, 22.5, 13.8.

**HRMS** (ESI)  $m/z$  calcd. for  $\text{C}_{19}\text{H}_{25}\text{N}_2\text{O}$   $[\text{M} + \text{H}]^+$  297.1961, found 297.1957.

### (S)-2-Morpholino-*N*-phenylhexanamide (**144**)

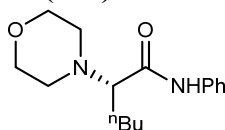

**144**

According to **General Procedure H** with 2-chloro-*N*-phenylhexanamide **E8** (67.5 mg, 0.30 mmol, 1.5 equiv.) and morpholine **A89** (17.4 mg, 0.20 mmol, 1.0 equiv.) for 72 h, the reaction mixture was purified by flash column chromatography on silica gel (petroleum ether/EtOAc = 2/1) to yield the product **144** as a colorless oil (54.6 mg, 99% yield, 95% e.e.).

**HPLC** analysis: Chiralcel IG (*n*-hexane/*i*-PrOH = 90/10, flow rate 1.0 mL/min,  $\lambda$  = 254 nm),  $t_R$  (minor) = 15.43 min,  $t_R$  (major) = 17.46 min.

**$^1\text{H}$  NMR** (400 MHz,  $\text{CDCl}_3$ )  $\delta$  8.96 (s, 1H), 7.57 – 7.55 (m, 2H), 7.35 – 7.31 (m, 2H), 7.12 – 7.09 (m, 1H), 3.81 – 3.72 (m, 4H), 2.96 (dd,  $J$  = 7.2, 5.4 Hz, 1H), 2.69 – 2.55 (m, 4H), 1.82 – 1.68 (m, 2H), 1.50 – 1.29 (m, 4H), 0.90 (t,  $J$  = 7.0 Hz, 3H).

**$^{13}\text{C}$  NMR** (100 MHz,  $\text{CDCl}_3$ )  $\delta$  171.0, 137.6, 129.0, 124.0, 119.3, 70.1, 67.2, 50.8, 28.6, 27.7, 22.8, 13.8.

**HRMS** (ESI)  $m/z$  calcd. for  $\text{C}_{16}\text{H}_{25}\text{N}_2\text{O}_2$   $[\text{M} + \text{H}]^+$  277.1911, found 277.1907.

### (S)-3-Cyclohexyl-2-(diethylamino)-*N*-phenylpropanamide (**145**)

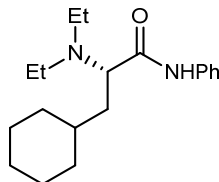

**145**

According to **General Procedure E** with 2-chloro-3-cyclohexyl-*N*-phenylpropanamide **E37** (79.5 mg, 0.30 mmol, 1.5 equiv.) and diethylamine **A51** (14.6 mg, 0.20 mmol, 1.0 equiv.) for 96 h, the reaction mixture was purified by flash column chromatography on silica gel (petroleum ether/EtOAc = 5/1) to yield the product **145** as a colorless oil (53.5 mg, 89% yield, 95% e.e.).

**HPLC** analysis: Chiralcel IA (*n*-hexane/*i*-PrOH = 95/5, flow rate 0.8 mL/min,  $\lambda$  = 254 nm),  $t_R$  (major) = 6.14 min,  $t_R$  (minor) = 9.09 min.

**$^1\text{H}$  NMR** (400 MHz,  $\text{CDCl}_3$ )  $\delta$  9.59 (s, 1H), 7.58 – 7.55 (m, 2H), 7.34 – 7.29 (m, 2H), 7.09 – 7.05 (m, 1H), 3.41 (dd,  $J$  = 8.8, 3.6 Hz, 1H), 2.67 – 2.58 (m, 2H), 2.53 – 2.45 (m, 2H), 1.86 – 1.77 (m, 3H), 1.73 – 1.63 (m, 3H), 1.62 – 1.51 (m, 1H), 1.35 – 1.16 (m, 4H), 1.11 (t,  $J$  = 7.1 Hz, 6H), 1.02 – 0.92 (m, 1H), 0.89 – 0.79 (m, 1H).

**$^{13}\text{C}$  NMR** (100 MHz,  $\text{CDCl}_3$ )  $\delta$  173.2, 138.1, 128.9, 123.6, 119.0, 61.1, 44.5, 35.8, 34.2, 32.8, 32.6, 26.6, 26.3, 26.2, 13.9.

**HRMS** (ESI)  $m/z$  calcd. for  $C_{19}H_{31}N_2O$   $[M + H]^+$  303.2431, found 303.2428.

**(S)-3-Methyl-2-morpholino-*N*-phenylbutanamide (146)**

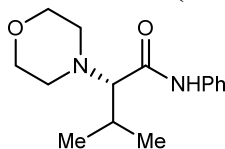

**146**

According to **General Procedure H** with 2-chloro-3-methyl-*N*-phenylbutanamide **E38** (63.3 mg, 0.30 mmol, 1.5 equiv.) and morpholine **A89** (17.4 mg, 0.20 mmol, 1.0 equiv.) for 72 h, the reaction mixture was purified by flash column chromatography on silica gel (petroleum ether/EtOAc = 2/1) to yield the product **146** as a colorless oil (18.9 mg, 36% yield, 87% e.e.).

**HPLC** analysis: Chiralcel IG (*n*-hexane/*i*-PrOH = 90/10, flow rate 1.0 mL/min,  $\lambda$  = 254 nm),  $t_R$  (major) = 15.16 min,  $t_R$  (minor) = 16.98 min.

**$^1H$  NMR** (400 MHz,  $CDCl_3$ )  $\delta$  8.46 (s, 1H), 7.56 – 7.53 (m, 2H), 7.36 – 7.31 (m, 2H), 7.13 – 7.09 (m, 1H), 3.80 – 3.72 (m, 4H), 2.74 (d,  $J$  = 5.0 Hz, 1H), 2.66 – 2.54 (m, 4H), 2.29 – 2.18 (m, 1H), 1.09 (d,  $J$  = 6.9 Hz, 3H), 0.97 (d,  $J$  = 6.8 Hz, 3H).

**$^{13}C$  NMR** (100 MHz,  $CDCl_3$ )  $\delta$  169.2, 137.4, 129.0, 124.2, 119.6, 76.0, 67.2, 51.4, 26.4, 20.2, 17.0.

**HRMS** (ESI)  $m/z$  calcd. for  $C_{15}H_{23}N_2O_2$   $[M + H]^+$  263.1754, found 263.1749.

**(S)-2-Cyclopentyl-2-morpholino-*N*-phenylacetamide (147)**

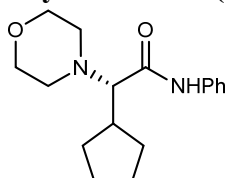

**147**

According to **General Procedure H** with 2-chloro-2-cyclopentyl-*N*-phenylacetamide **E39** (71.1 mg, 0.30 mmol, 1.5 equiv.) and morpholine **A89** (17.2 mg, 0.20 mmol, 1.0 equiv.) for 72 h, the reaction mixture was purified by flash column chromatography on silica gel (petroleum ether/EtOAc = 2/1) to yield the product **147** as a colorless oil (32.8 mg, 57% yield, 81% e.e.).

**HPLC** analysis: Chiralcel IG (*n*-hexane/*i*-PrOH = 90/10, flow rate 0.7 mL/min,  $\lambda$  = 254 nm),  $t_R$  (major) = 23.92 min,  $t_R$  (minor) = 26.42 min.

**$^1H$  NMR** (400 MHz,  $CDCl_3$ )  $\delta$  8.64 (s, 1H), 7.55 – 7.52 (m, 2H), 7.35 – 7.30 (m, 2H), 7.12 – 7.08 (m, 1H), 3.78 – 3.70 (m, 4H), 2.91 (d,  $J$  = 6.8 Hz, 1H), 2.72 – 2.60 (m, 4H), 2.32 – 2.22 (m, 1H), 1.89 – 1.81 (m, 1H), 1.72 – 1.58 (m, 4H), 1.56 – 1.39 (m, 3H).

**$^{13}C$  NMR** (101 MHz,  $CDCl_3$ )  $\delta$  170.2, 137.5, 129.0, 124.1, 119.6, 74.5, 67.3, 51.3, 38.8, 30.8, 28.9, 25.3, 25.0.

**HRMS** (ESI)  $m/z$  calcd. for  $C_{17}H_{25}N_2O_2$   $[M + H]^+$  289.1911, found 289.1905.

**(S)-2-(Benzylamino)-3,3-dimethyl-*N*-phenylbutanamide (148)**

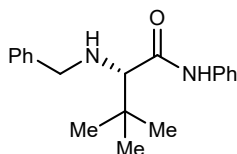

**148**

According to **General Procedure H** with 2-chloro-3,3-dimethyl-*N*-phenylbutanamide **E40** (90.0 mg, 0.40 mmol, 2.0 equiv.) and benzylamine **A1** (21.4 mg, 0.20 mmol, 1.0 equiv.) for 72 h, the reaction mixture was purified by flash column chromatography on silica gel (petroleum ether/EtOAc = 10/1) to yield the product **148** as a colorless oil (46.9 mg, 79% yield, 87% e.e.).

**HPLC** analysis: Chiralcel IC (*n*-hexane/*i*-PrOH = 95/5, flow rate 0.8 mL/min,  $\lambda$  = 254 nm),  $t_R$  (major) = 12.55 min,  $t_R$  (minor) = 14.13 min.

**$^1\text{H}$  NMR** (400 MHz,  $\text{CDCl}_3$ )  $\delta$  9.13 (s, 1H), 7.60 – 7.56 (m, 2H), 7.38 – 7.27 (m, 7H), 7.12 – 7.08 (m, 1H), 3.82 (d,  $J$  = 13.1 Hz, 1H), 3.66 (d,  $J$  = 13.1 Hz, 1H), 2.95 (s, 1H), 1.85 (s, 1H), 1.04 (s, 9H).

**$^{13}\text{C}$  NMR** (100 MHz,  $\text{CDCl}_3$ )  $\delta$  170.8, 139.3, 137.7, 129.0, 128.6, 128.2, 127.4, 124.0, 119.4, 72.6, 53.4, 34.1, 27.2.

**HRMS** (ESI)  $m/z$  calcd. for  $\text{C}_{19}\text{H}_{25}\text{N}_2\text{O}$   $[\text{M} + \text{H}]^+$  297.1961, found 297.1957.

#### (*S*)-3,3-Dimethyl-2-morpholino-*N*-phenylbutanamide (**149**)

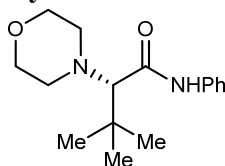

**149**

According to **General Procedure H** with 2-chloro-3,3-dimethyl-*N*-phenylbutanamide **E40** (67.5 mg, 0.30 mmol, 1.5 equiv.) and morpholine **A89** (17.4 mg, 0.20 mmol, 1.0 equiv.) for 72 h, the reaction mixture was purified by flash column chromatography on silica gel (petroleum ether/EtOAc = 3/1) to yield the product **149** as a colorless oil (40.8 mg, 74% yield, 87% e.e.).

**HPLC** analysis: Chiralcel IA (*n*-hexane/*i*-PrOH = 90/10, flow rate 0.8 mL/min,  $\lambda$  = 254 nm),  $t_R$  (minor) = 7.50 min,  $t_R$  (major) = 10.48 min.

**$^1\text{H}$  NMR** (400 MHz,  $\text{CDCl}_3$ )  $\delta$  7.86 (s, 1H), 7.53 – 7.50 (m, 2H), 7.35 – 7.30 (m, 2H), 7.14 – 7.09 (m, 1H), 3.76 – 3.68 (m, 4H), 2.91 – 2.86 (m, 2H), 2.71 – 2.66 (m, 2H), 2.64 (s, 1H), 1.12 (s, 9H).

**$^{13}\text{C}$  NMR** (100 MHz,  $\text{CDCl}_3$ )  $\delta$  169.1, 137.4, 129.0, 124.4, 120.0, 79.0, 67.6, 53.2, 35.3, 27.9.

**HRMS** (ESI)  $m/z$  calcd. for  $\text{C}_{16}\text{H}_{25}\text{N}_2\text{O}_2$   $[\text{M} + \text{H}]^+$  277.1911, found 277.1907.

#### (*S*)-2-(Benzylamino)-*N*,5-diphenylpentanamide (**150**)

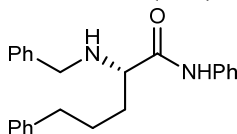

**150**

According to **General Procedure H** with 2-chloro-*N*,5-diphenylpentanamide **E10** (114.8 mg, 0.40 mmol, 2.0 equiv.) and benzylamine **A1** (21.4 mg, 0.20 mmol, 1.0 equiv.) for 96 h, the

reaction mixture was purified by flash column chromatography on silica gel (petroleum ether/EtOAc = 3/1) to yield the product **150** as a colorless oil (63.1 mg, 88% yield, 85% e.e.).

**HPLC** analysis: Chiralcel IC (*n*-hexane/*i*-PrOH = 95/5, flow rate 1.0 mL/min,  $\lambda$  = 254 nm),  $t_R$  (major) = 17.07 min,  $t_R$  (minor) = 26.52 min.

**$^1\text{H}$  NMR** (400 MHz,  $\text{CDCl}_3$ )  $\delta$  9.34 (s, 1H), 7.58 – 7.56 (m, 2H), 7.36 – 7.22 (m, 9H), 7.18 – 7.16 (m, 1H), 7.15 – 7.07 (m, 3H), 3.81 – 3.70 (m, 2H), 3.30 – 3.27 (m, 1H), 2.73 (s, 1H), 2.59 (t,  $J$  = 7.1 Hz, 2H), 1.89 – 1.81 (m, 1H), 1.75 – 1.63 (m, 3H).

**$^{13}\text{C}$  NMR** (100 MHz,  $\text{CDCl}_3$ )  $\delta$  172.2, 141.6, 138.9, 137.6, 129.0, 128.7, 128.34, 128.32, 128.1, 127.5, 125.9, 124.0, 119.3, 62.9, 52.9, 35.5, 33.2, 27.6.

**HRMS** (ESI)  $m/z$  calcd. for  $\text{C}_{24}\text{H}_{27}\text{N}_2\text{O}$   $[\text{M} + \text{H}]^+$  359.2118, found 359.2112.

### (*S*)-2-(Benzylamino)-*N*-phenylhex-5-enamide (**151**)

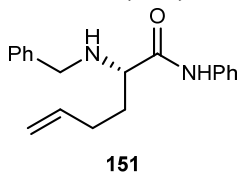

According to **General Procedure H** with 2-chloro-*N*-phenylhex-5-enamide **E11** (89.2 mg, 0.40 mmol, 2.0 equiv.) and benzylamine **A1** (21.4 mg, 0.20 mmol, 1.0 equiv.) for 96 h, the reaction mixture was purified by flash column chromatography on silica gel (petroleum ether/EtOAc = 3/1) to yield the product **151** as a colorless oil (45.9 mg, 78% yield, 92% e.e.).

**HPLC** analysis: Chiralcel IC (*n*-hexane/*i*-PrOH = 95/5, flow rate 1.0 mL/min,  $\lambda$  = 254 nm),  $t_R$  (major) = 13.24 min,  $t_R$  (minor) = 18.63 min.

**$^1\text{H}$  NMR** (400 MHz,  $\text{CDCl}_3$ )  $\delta$  9.36 (s, 1H), 7.59 – 7.57 (m, 2H), 7.39 – 7.27 (m, 7H), 7.13 – 7.08 (m, 1H), 5.84 – 5.74 (m, 1H), 5.06 – 4.98 (m, 2H), 3.84 – 3.74 (m, 2H), 3.28 (dd,  $J$  = 8.0, 4.7 Hz, 1H), 2.26 – 2.11 (m, 2H), 2.01 – 1.92 (m, 1H), 1.78 – 1.71 (m, 2H).

**$^{13}\text{C}$  NMR** (100 MHz,  $\text{CDCl}_3$ )  $\delta$  172.2, 139.2, 137.7, 137.3, 129.0, 128.7, 128.1, 127.5, 124.0, 119.3, 115.7, 62.7, 53.0, 32.8, 30.3.

**HRMS** (ESI)  $m/z$  calcd. for  $\text{C}_{19}\text{H}_{23}\text{N}_2\text{O}$   $[\text{M} + \text{H}]^+$  295.1805, found 295.1801.

### (*S*)-2-(Benzylamino)-*N*,6-diphenylhex-5-ynamide (**152**)

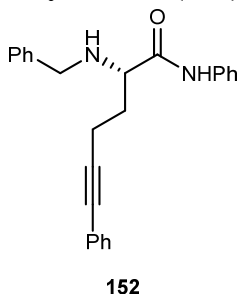

According to **General Procedure H** with 2-chloro-*N*,6-diphenylhex-5-ynamide **E12** (118.8 mg, 0.40 mmol, 2.0 equiv.) and benzylamine **A1** (21.4 mg, 0.20 mmol, 1.0 equiv.) for 72 h, the reaction mixture was purified by flash column chromatography on silica gel (petroleum ether/EtOAc = 3/1) to yield the product **152** as a colorless oil (37.6 mg, 51% yield, 94% e.e.).

**HPLC** analysis: Chiralcel IG (*n*-hexane/*i*-PrOH = 90/10, flow rate 0.8 mL/min,  $\lambda$  = 254 nm),  $t_R$  (major) = 28.83 min,  $t_R$  (minor) = 33.14 min.

**$^1\text{H}$  NMR** (400 MHz,  $\text{CDCl}_3$ )  $\delta$  9.44 (s, 1H), 7.60 – 7.57 (m, 2H), 7.35 – 7.22 (m, 12H), 7.13 –

7.08 (m, 1H), 3.84 (s, 2H), 3.46 (dd,  $J = 8.0, 4.6$  Hz, 1H), 2.67 – 2.53 (m, 2H), 2.31 (s, 1H), 2.23 – 2.15 (m, 1H), 1.99 – 1.90 (m, 1H).

$^{13}\text{C}$  NMR (101 MHz,  $\text{CDCl}_3$ )  $\delta$  171.8, 139.0, 137.6, 131.5, 129.0, 128.7, 128.2, 128.1, 127.8, 127.4, 124.1, 123.2, 119.4, 88.7, 82.0, 63.0, 53.0, 31.8, 16.8.

HRMS (ESI)  $m/z$  calcd. for  $\text{C}_{25}\text{H}_{25}\text{N}_2\text{O}$   $[\text{M} + \text{H}]^+$  369.1961, found 369.1955.

**(S)-2-(Benzylamino)-4-(1,3-dioxoisindolin-2-yl)-N-phenylbutanamide (153)**

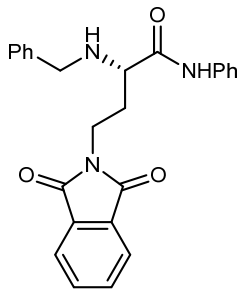

**153**

According to **General Procedure H** with 2-chloro-4-(1,3-dioxoisindolin-2-yl)-*N*-phenylbutanamide **E13** (136.8 mg, 0.40 mmol, 2.0 equiv.) and benzylamine **A1** (21.4 mg, 0.20 mmol, 1.0 equiv.) for 72 h, the reaction mixture was purified by flash column chromatography on silica gel (petroleum ether/EtOAc = 1/1) to yield the product **153** as a colorless oil (47.9 mg, 58% yield, 88% e.e.).

HPLC analysis: Chiralcel IG (*n*-hexane/*i*-PrOH = 85/15, flow rate 1.0 mL/min,  $\lambda = 214$  nm),  $t_R$  (major) = 114.44 min,  $t_R$  (minor) = 131.36 min.

$^1\text{H}$  NMR (400 MHz,  $\text{CDCl}_3$ )  $\delta$  9.37 (s, 1H), 7.82 – 7.77 (m, 2H), 7.71 – 7.65 (m, 2H), 7.55 – 7.52 (m, 2H), 7.36 – 7.22 (m, 7H), 7.09 – 7.05 (m, 1H), 3.87 – 3.75 (m, 4H), 3.27 (t,  $J = 6.3$  Hz, 1H), 2.26 – 2.17 (m, 1H), 2.14 – 2.06 (m, 2H).

$^{13}\text{C}$  NMR (100 MHz,  $\text{CDCl}_3$ )  $\delta$  171.4, 168.4, 139.1, 137.6, 134.0, 131.8, 128.9, 128.6, 128.1, 127.4, 124.0, 123.3, 119.3, 60.4, 52.4, 34.3, 31.4.

HRMS (ESI)  $m/z$  calcd. for  $\text{C}_{25}\text{H}_{24}\text{N}_3\text{O}_3$   $[\text{M} + \text{H}]^+$  414.1812, found 414.1806.

**(S)-2-(Benzylamino)-4-(methylthio)-N-phenylbutanamide (154)**

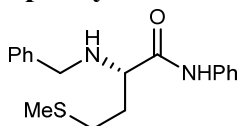

**154**

According to **General Procedure H** with 2-chloro-4-(methylthio)-*N*-phenylbutanamide **E15** (97.2 mg, 0.40 mmol, 2.0 equiv.) and benzylamine **A1** (21.4 mg, 0.20 mmol, 1.0 equiv.) for 72 h, the reaction mixture was purified by flash column chromatography on silica gel (petroleum ether/EtOAc = 3/1) to yield the product **154** as a colorless oil (47.2 mg, 75% yield, 85% e.e.).

HPLC analysis: Chiralcel IC (*n*-hexane/*i*-PrOH = 95/5, flow rate 1.0 mL/min,  $\lambda = 254$  nm),  $t_R$  (major) = 23.29 min,  $t_R$  (minor) = 28.02 min.

$^1\text{H}$  NMR (400 MHz,  $\text{CDCl}_3$ )  $\delta$  9.34 (s, 1H), 7.59 – 7.56 (m, 2H), 7.39 – 7.27 (m, 7H), 7.14 – 7.09 (m, 1H), 3.86 – 3.77 (m, 2H), 3.41 (dd,  $J = 7.6, 5.1$  Hz, 1H), 2.67 – 2.56 (m, 2H), 2.22 – 2.12 (m, 1H), 2.11 (s, 3H), 1.98 – 1.89 (m, 1H), 1.31 (s, 1H).

$^{13}\text{C}$  NMR (100 MHz,  $\text{CDCl}_3$ )  $\delta$  171.8, 139.1, 137.6, 129.0, 128.8, 128.1, 127.6, 124.2, 119.4, 62.4, 52.9, 32.5, 30.9, 15.4.

HRMS (ESI)  $m/z$  calcd. for  $\text{C}_{18}\text{H}_{23}\text{N}_2\text{OS}$   $[\text{M} + \text{H}]^+$  315.1526, found 315.1520.

**(S)-2-(Benzylamino)-5,5,5-trifluoro-N-phenylpentanamide (155)**

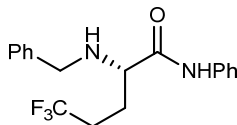

**155**

According to **General Procedure H** with 2-chloro-5,5,5-trifluoro-N-phenylpentanamide **E16** (106.0 mg, 0.40 mmol, 2.0 equiv.) and benzylamine **A1** (21.4 mg, 0.20 mmol, 1.0 equiv.) for 72 h, the reaction mixture was purified by flash column chromatography on silica gel (petroleum ether/EtOAc = 5/1) to yield the product **155** as a colorless oil (52.8 mg, 79% yield, 97% e.e.).

HPLC analysis: Chiralcel IA (*n*-hexane/*i*-PrOH = 90/10, flow rate 0.8 mL/min,  $\lambda$  = 254 nm),  $t_R$  (major) = 9.55 min,  $t_R$  (minor) = 10.57 min.

$^1\text{H}$  NMR (400 MHz,  $\text{CDCl}_3$ )  $\delta$  9.20 (s, 1H), 7.57 – 7.54 (m, 2H), 7.40 – 7.28 (m, 7H), 7.15 – 7.11 (m, 1H), 3.87 – 3.76 (m, 2H), 3.30 (t,  $J$  = 6.5 Hz, 1H), 2.33 – 2.16 (m, 2H), 2.07 – 1.90 (m, 2H), 1.73 (s, 1H).

$^{13}\text{C}$  NMR (100 MHz,  $\text{CDCl}_3$ )  $\delta$  170.9, 138.7, 137.4, 129.1, 128.9, 128.1, 127.8, 126.8 (q,  $J$  = 274.6 Hz), 124.5, 119.5, 61.4, 52.7, 30.5 (q,  $J$  = 29.0 Hz), 26.1 (q,  $J$  = 2.8 Hz).

$^{19}\text{F}$  NMR (376 MHz,  $\text{CDCl}_3$ )  $\delta$  -66.43 (s, 3F).

HRMS (ESI)  $m/z$  calcd. for  $\text{C}_{18}\text{H}_{20}\text{F}_3\text{N}_2\text{O}$   $[\text{M} + \text{H}]^+$  337.1522, found 337.1517.

**(S)-2-Morpholino-N,2-diphenylacetamide (156)**

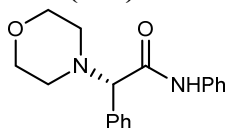

**156**

According to **General Procedure F** with 2-chloro-N,2-diphenylacetamide **E18** (73.5 mg, 0.30 mmol, 1.5 equiv.) and morpholine **A89** (17.4 mg, 0.20 mmol, 1.0 equiv.) for 72 h, the reaction mixture was purified by flash column chromatography on silica gel (petroleum ether/EtOAc = 2/1) to yield the product **156** as a white solid (52.6 mg, 89% yield, 94% e.e.).

HPLC analysis: Chiralcel IA (*n*-hexane/*i*-PrOH = 80/20, flow rate 1.0 mL/min,  $\lambda$  = 254 nm),  $t_R$  (minor) = 7.73 min,  $t_R$  (major) = 9.89 min.

$^1\text{H}$  NMR (400 MHz,  $\text{CDCl}_3$ )  $\delta$  9.06 (s, 1H), 7.58 – 7.55 (m, 2H), 7.37 – 7.30 (m, 7H), 7.13 – 7.09 (m, 1H), 3.96 (s, 1H), 3.79 – 3.73 (m, 4H), 2.55 – 2.47 (m, 4H).

$^{13}\text{C}$  NMR (100 MHz,  $\text{CDCl}_3$ )  $\delta$  169.0, 137.5, 134.7, 129.0, 128.83, 128.77, 128.5, 124.3, 119.5, 76.7, 67.0, 52.1.

HRMS (ESI)  $m/z$  calcd. for  $\text{C}_{18}\text{H}_{21}\text{N}_2\text{O}_2$   $[\text{M} + \text{H}]^+$  297.1598, found 297.1602.

**(S)-N,2-Diphenyl-2-(piperidin-1-yl)acetamide (157)**

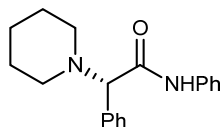

**157**

According to **General Procedure F** with 2-chloro-*N*,2-diphenylacetamide **E18** (73.5 mg, 0.30 mmol, 1.5 equiv.) and piperidine **A55** (17.0 mg, 0.20 mmol, 1.0 equiv.) for 72 h, the reaction mixture was purified by flash column chromatography on silica gel (petroleum ether/EtOAc = 3/1) to yield the product **156** as a white solid (50.3 mg, 85% yield, 94% e.e.).

**HPLC** analysis: Chiralcel IH (*n*-hexane/*i*-PrOH = 95/5, flow rate 1.0 mL/min,  $\lambda$  = 254 nm),  $t_R$  (major) = 9.35 min,  $t_R$  (minor) = 11.44 min.

**$^1\text{H}$  NMR** (400 MHz,  $\text{CDCl}_3$ )  $\delta$  9.44 (s, 1H), 7.61 – 7.57 (m, 2H), 7.34 – 7.29 (m, 7H), 7.11 – 7.07 (m, 1H), 4.05 (s, 1H), 2.51 – 2.42 (m, 4H), 1.66 – 1.61 (m, 4H), 1.48 – 1.42 (m, 2H).

**$^{13}\text{C}$  NMR** (100 MHz,  $\text{CDCl}_3$ )  $\delta$  169.8, 137.8, 135.0, 129.2, 129.0, 128.4, 128.1, 124.0, 119.4, 76.3, 52.6, 26.3, 24.0.

**HRMS** (ESI)  $m/z$  calcd. for  $\text{C}_{19}\text{H}_{23}\text{N}_2\text{O}$  [ $\text{M} + \text{H}$ ] $^+$  295.1805, found 295.1810.

## 7. Procedure for synthetic applications

### Catalyst-controlled stereoselectivity in the *N*-alkylation of chiral aliphatic amines (*S*)-*N*-Phenyl-2-(((*R*)-1-phenylethyl)amino)propanamide (**158**)

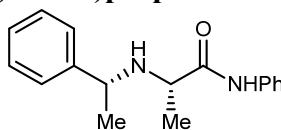

**158**

According to **General procedure A** with 2-chloro-*N*-phenylpropanamide **E1** (54.9 mg, 0.30 mmol, 1.5 equiv.) and (*R*)-1-phenylethan-1-amine **A100** (24.2 mg, 0.20 mmol, 1.0 equiv.) for 72 h, the reaction mixture was purified by flash column chromatography on silica gel (petroleum ether/EtOAc = 1/1) to yield the product **158** as a colorless oil (47.0 mg, 88% yield, >20:1 d.r.). The diastereomeric ratio was determined by crude  $^1\text{H}$  NMR spectroscopy.

**$^1\text{H}$  NMR** (400 MHz,  $\text{CDCl}_3$ )  $\delta$  9.31 (s, 1H), 7.45 – 7.42 (m, 2H), 7.34 – 7.19 (m, 7H), 7.08 – 7.03 (m, 1H), 3.86 (q,  $J$  = 6.6 Hz, 1H), 3.27 (q,  $J$  = 7.0 Hz, 1H), 1.59 (s, 1H), 1.45 (d,  $J$  = 6.6 Hz, 3H), 1.41 (d,  $J$  = 7.0 Hz, 3H).

**$^{13}\text{C}$  NMR** (100 MHz,  $\text{CDCl}_3$ )  $\delta$  173.0, 144.2, 137.7, 128.8, 128.7, 127.4, 126.5, 123.8, 119.2, 57.2, 56.6, 23.6, 19.1.

**HRMS** (ESI)  $m/z$  calcd. For  $\text{C}_{17}\text{H}_{21}\text{N}_2\text{O}$  [ $\text{M} + \text{H}$ ] $^+$  269.1648, found 269.1651.

### (*R*)-*N*-Phenyl-2-(((*R*)-1-phenylethyl)amino)propanamide ((*R*)-**158**)

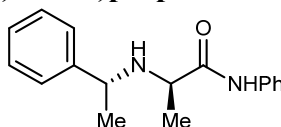

(*R*)-**158**

According to **General procedure A** with 2-chloro-*N*-phenylpropanamide **E1** (54.9 mg, 0.30 mmol, 1.5 equiv.), (*R*)-1-phenylethan-1-amine **A100** (24.2 mg, 0.20 mmol, 1.0 equiv.), and (8*R*,9*R*)-**L\*4** (15.4 mg, 0.03 mmol, 15 mol%) for 72 h, the reaction mixture was purified by flash

column chromatography on silica gel (petroleum ether/EtOAc = 3/1) to yield the product (*R*)-**158** as a white solid (45.8 mg, 85% yield, >20:1 d.r.). The diastereomeric ratio was determined by crude  $^1\text{H}$  NMR spectroscopy.

$^1\text{H}$  NMR (400 MHz,  $\text{CDCl}_3$ )  $\delta$  9.40 (s, 1H), 7.62 – 7.61 (m, 2H), 7.36 – 7.32 (m, 4H), 7.28 – 7.24 (m, 3H), 7.13 – 7.09 (m, 1H), 3.75 (q,  $J$  = 6.7 Hz, 1H), 3.13 (q,  $J$  = 7.0 Hz, 1H), 1.79 (s, 1H), 1.40 (d,  $J$  = 6.7 Hz, 3H), 1.28 (d,  $J$  = 7.1 Hz, 3H).

$^{13}\text{C}$  NMR (100 MHz,  $\text{CDCl}_3$ )  $\delta$  173.5, 144.4, 137.8, 129.0, 128.7, 127.4, 126.2, 124.0, 119.3, 57.4, 56.6, 24.1, 20.2.

HRMS (ESI)  $m/z$  calcd. for  $\text{C}_{17}\text{H}_{21}\text{N}_2\text{O}$   $[\text{M} + \text{H}]^+$  269.1648, found 269.1650.

**(*S*)-2-(((1*S*,2*S*)-2-(Dimethylamino)cyclohexyl)amino)-*N*-phenylpropanamide (**159**)**

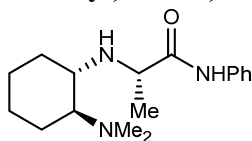

**159**

According to **General Procedure B** with 2-chloro-*N*-phenylpropanamide **E1** (54.9 mg, 0.30 mmol, 1.5 equiv.) and (1*S*,2*S*)-*N*<sup>1</sup>, *N*<sup>1</sup>-dimethylcyclohexane-1,2-diamine **A101** (28.4 mg, 0.20 mmol, 1.0 equiv.) for 96 h, the reaction mixture was purified by preparative thin-layer chromatography on silica gel (EtOAc/ $\text{CH}_3\text{OH}$  = 20/1) to yield the product **159** as a colorless oil (42.5 mg, 73% yield, >20:1 d.r.). The diastereomeric ratio was determined by crude  $^1\text{H}$  NMR spectroscopy.

$^1\text{H}$  NMR (400 MHz,  $\text{CDCl}_3$ )  $\delta$  9.88 (s, 1H), 7.68 – 7.65 (m, 2H), 7.34 – 7.29 (m, 2H), 7.10 – 7.05 (m, 1H), 3.25 (q,  $J$  = 7.0 Hz, 1H), 3.01 (s, 1H), 2.50 – 2.38 (m, 2H), 2.33 (s, 6H), 2.02 – 1.97 (m, 1H), 1.87 – 1.79 (m, 2H), 1.67 – 1.62 (m, 1H), 1.41 (d,  $J$  = 7.0 Hz, 3H), 1.23 – 1.02 (m, 4H).

$^{13}\text{C}$  NMR (100 MHz,  $\text{CDCl}_3$ )  $\delta$  174.4, 138.1, 128.8, 123.8, 119.5, 67.0, 58.5, 57.4, 39.8, 32.6, 25.1, 24.4, 20.9, 19.6.

HRMS (ESI)  $m/z$  calcd. For  $\text{C}_{17}\text{H}_{28}\text{N}_3\text{O}$   $[\text{M} + \text{H}]^+$  290.2227, found 290.2228.

**(*R*)-2-(((1*S*,2*S*)-2-(Dimethylamino)cyclohexyl)amino)-*N*-phenylpropanamide ((*R*)-**159**)**

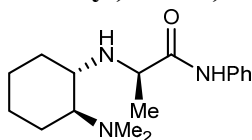

**(*R*)-159**

According to **General Procedure B** with 2-chloro-*N*-phenylpropanamide **E1** (54.9 mg, 0.30 mmol, 1.5 equiv.), (1*S*,2*S*)-*N*<sup>1</sup>, *N*<sup>1</sup>-dimethylcyclohexane-1,2-diamine **A101** (28.4 mg, 0.20 mmol, 1.0 equiv.), and (8*R*,9*R*)-**L\*5** (15.8 mg, 0.03 mmol, 15 mol%) for 96 h, the reaction mixture was purified by preparative thin-layer chromatography on silica gel (EtOAc/ $\text{CH}_3\text{OH}$  = 20/1) to yield the product (*R*)-**159** as a colorless oil (43.6 mg, 75% yield, >20:1 d.r.). The diastereomeric ratio was determined by crude  $^1\text{H}$  NMR spectroscopy.

$^1\text{H}$  NMR (400 MHz,  $\text{CDCl}_3$ )  $\delta$  10.40 (s, 1H), 7.97 – 7.95 (m, 2H), 7.31 – 7.27 (m, 2H), 7.08 – 7.04 (m, 1H), 5.34 (s, 1H), 3.92 (q,  $J$  = 6.8 Hz, 1H), 3.11 – 3.05 (m, 1H), 2.64 – 2.40 (m, 8H), 1.99 – 1.95 (m, 1H), 1.89 – 1.85 (m, 1H), 1.81 – 1.77 (m, 1H), 1.56 (d,  $J$  = 6.8 Hz, 3H), 1.38 – 1.16 (m, 4H).



<sup>13</sup>C NMR (100 MHz, CDCl<sub>3</sub>) δ 172.9, 138.5, 128.6, 123.8, 119.9, 67.6, 56.1, 55.8, 40.0, 30.2, 24.19, 24.16, 22.6, 20.0.

HRMS (ESI) *m/z* calcd. For C<sub>17</sub>H<sub>28</sub>N<sub>3</sub>O [M + H]<sup>+</sup> 290.2227, found 290.2230.

**(S)-2-(((R)-1-(7-(But-2-yn-1-yl)-3-methyl-1-((4-methylquinazolin-2-yl)methyl)-2,6-dioxo-2,3,6,7-tetrahydro-1H-purin-8-yl)piperidin-3-yl)amino)-N-phenylpropanamide (160)**

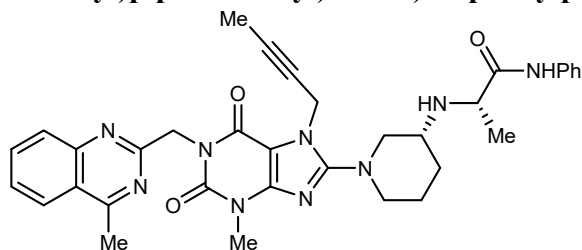

**160**

According to **General Procedure B** with 2-chloro-*N*-phenylpropanamide **E1** (54.9 mg, 0.30 mmol, 1.5 equiv.), linagliptin **A102** (94.4 mg, 0.20 mmol, 1.0 equiv.) for 96 h, the reaction mixture was purified by preparative thin-layer chromatography on silica gel (CH<sub>2</sub>Cl<sub>2</sub>/CH<sub>3</sub>OH = 20/1) to yield the product **160** as a white solid (115.3 mg, 93% yield, >20:1 d.r.). The diastereomeric ratio was determined by crude <sup>1</sup>H NMR spectroscopy.

<sup>1</sup>H NMR (400 MHz, CDCl<sub>3</sub>) δ 9.38 (s, 1H), 7.99 – 7.97 (m, 1H), 7.86 – 7.84 (m, 1H), 7.75 – 7.71 (m, 1H), 7.57 – 7.54 (m, 2H), 7.52 – 7.47 (m, 1H), 7.31 – 7.27 (m, 2H), 7.08 – 7.04 (m, 1H), 5.54 (s, 2H), 4.86 – 4.84 (m, 2H), 3.68 – 3.64 (m, 1H), 3.53 – 3.42 (m, 5H), 3.26 – 3.19 (m, 1H), 3.14 – 3.08 (m, 1H), 2.97 – 2.92 (m, 1H), 2.86 (s, 3H), 2.04 – 1.97 (m, 1H), 1.94 – 1.87 (m, 1H), 1.80 – 1.67 (m, 4H), 1.55 – 1.49 (m, 1H), 1.44 (d, *J* = 6.9 Hz, 3H), 1.26 (s, 1H).

<sup>13</sup>C NMR (100 MHz, CDCl<sub>3</sub>) δ 173.0, 168.3, 161.0, 155.6, 154.1, 151.6, 149.7, 147.6, 137.4, 133.1, 128.8, 128.6, 126.5, 124.7, 124.0, 122.9, 119.3, 104.4, 81.5, 73.0, 56.5, 55.7, 52.8, 50.4, 46.1, 35.5, 30.2, 29.4, 22.8, 21.6, 20.1, 3.5.

HRMS (ESI) *m/z* calcd. for C<sub>34</sub>H<sub>38</sub>N<sub>9</sub>O<sub>3</sub> [M + H]<sup>+</sup> 620.3092, found 620.3094.

**(R)-2-(((R)-1-(7-(But-2-yn-1-yl)-3-methyl-1-((4-methylquinazolin-2-yl)methyl)-2,6-dioxo-2,3,6,7-tetrahydro-1H-purin-8-yl)piperidin-3-yl)amino)-N-phenylpropanamide ((R)-160)**

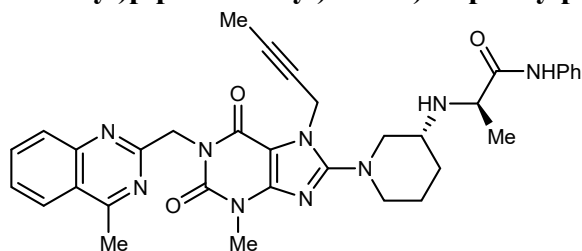

**(R)-160**

According to **General Procedure B** with 2-chloro-*N*-phenylpropanamide **E1** (54.9 mg, 0.30 mmol, 1.5 equiv.), linagliptin **A102** (94.4 mg, 0.20 mmol, 1.0 equiv.), and (8*R*,9*R*)-**L\*5** (15.8 mg, 0.03 mmol, 15 mol%) for 96 h, the reaction mixture was purified by preparative thin-layer chromatography on silica gel (CH<sub>2</sub>Cl<sub>2</sub>/CH<sub>3</sub>OH = 20/1) to yield the product (*R*)-**160** as a white solid (119.1 mg, 96% yield, >20:1 d.r.). The diastereomeric ratio was determined by crude <sup>1</sup>H NMR spectroscopy.

**<sup>1</sup>H NMR** (400 MHz, CDCl<sub>3</sub>) δ 9.38 (s, 1H), 7.99 – 7.97 (m, 1H), 7.85 – 7.83 (m, 1H), 7.75 – 7.71 (m, 1H), 7.60 – 7.54 (m, 2H), 7.52 – 7.48 (m, 1H), 7.33 – 7.29 (m, 2H), 7.10 – 7.07 (m, 1H), 5.57 (s, 2H), 4.90 – 4.80 (m, 2H), 3.81 – 3.77 (m, 1H), 3.59 – 3.44 (m, 5H), 3.22 – 3.12 (m, 1H), 3.04 – 2.99 (m, 1H), 2.88 – 2.82 (m, 4H), 2.03 – 1.97 (m, 1H), 1.93 – 1.88 (m, 1H), 1.81 – 1.68 (m, 4H), 1.53 – 1.46 (m, 1H), 1.39 (d, *J* = 6.9 Hz, 3H), 1.26 (s, 1H).

**<sup>13</sup>C NMR** (100 MHz, CDCl<sub>3</sub>) δ 173.1, 168.3, 160.9, 155.8, 154.2, 151.6, 149.7, 147.7, 137.6, 133.1, 128.8, 128.6, 126.5, 124.7, 123.9, 122.9, 119.0, 104.4, 81.5, 73.1, 56.3, 54.9, 52.7, 50.4, 46.1, 35.5, 31.6, 29.6, 23.0, 21.6, 20.1, 3.5.

**HRMS** (ESI) *m/z* calcd. for C<sub>34</sub>H<sub>38</sub>N<sub>9</sub>O<sub>3</sub> [*M* + *H*]<sup>+</sup> 620.3092, found 620.3096.

### Late-stage N-alkylation of amine drug molecules

#### 3-Ethyl 5-methyl (*S*)-4-(2-chlorophenyl)-6-methyl-2-((2-(((*S*)-1-oxo-1-(phenylamino)propan-2-yl)amino)ethoxy)methyl)-1,4-dihydropyridine-3,5-dicarboxylate (**161**)

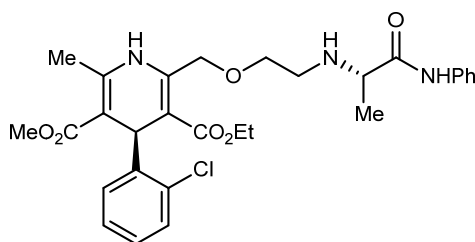

**161**

According to **General Procedure B** with 2-chloro-*N*-phenylpropanamide **E1** (54.9 mg, 0.30 mmol, 1.5 equiv.) and (*S*)-amlodipine **A103** (81.6 mg, 0.20 mmol, 1.0 equiv.) for 96 h, the reaction mixture was purified by preparative thin-layer chromatography on silica gel (EtOAc/CH<sub>3</sub>OH = 50/1) to yield the product **161** as a yellowish oil (84.6 mg, 76% yield, >20:1 d.r.). The diastereomeric ratio was determined by crude <sup>1</sup>H NMR spectroscopy.

**<sup>1</sup>H NMR** (400 MHz, CDCl<sub>3</sub>) δ 9.27 (s, 1H), 7.59 – 7.57 (m, 2H), 7.38 – 7.36 (m, 1H), 7.32 – 7.28 (m, 2H), 7.25 – 7.22 (m, 1H), 7.14 – 7.02 (m, 4H), 5.41 (s, 1H), 4.81 – 4.70 (m, 2H), 4.10 – 3.98 (m, 2H), 3.73 – 3.66 (m, 2H), 3.62 (s, 3H), 3.39 – 3.33 (m, 1H), 3.06 – 3.00 (m, 1H), 2.89 – 2.83 (m, 1H), 2.30 (s, 3H), 1.89 (s, 1H), 1.43 (d, *J* = 7.0 Hz, 3H), 1.18 (t, *J* = 7.1 Hz, 3H).

**<sup>13</sup>C NMR** (100 MHz, CDCl<sub>3</sub>) δ 172.9, 167.9, 167.0, 145.6, 144.8, 143.9, 137.7, 132.3, 131.4, 129.2, 129.0, 127.3, 126.8, 124.1, 119.2, 103.9, 101.8, 71.0, 68.0, 59.8, 59.0, 50.7, 47.9, 37.2, 19.8, 19.3, 14.2.

**HRMS** (ESI) *m/z* calcd. for C<sub>29</sub>H<sub>35</sub>ClN<sub>3</sub>O<sub>6</sub> [*M* + *H*]<sup>+</sup> 556.2209, found 556.2206.

#### (2*S*)-2-(((3,5-Dimethyladamantan-1-yl)amino)-*N*-phenylpropanamide (**162**)

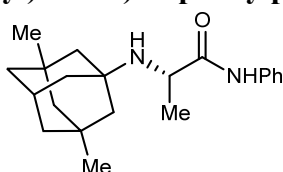

**162**

According to **General Procedure B** with 2-chloro-*N*-phenylpropanamide **E1** (54.9 mg, 0.30 mmol, 1.5 equiv.), memantine hydrochloride **A104** (43.0 mg, 0.20 mmol, 1.0 equiv.), **L\*4** (15.4 mg, 0.03 mmol, 15 mol%), Cs<sub>2</sub>CO<sub>3</sub> (260.6 mg, 0.80 mmol, 4.0 equiv.), anhydrous NMP (2.8 mL),

and EtOAc (1.2 mL) for 96 h, the reaction mixture was purified by flash column chromatography on silica gel (petroleum ether/EtOAc = 1/1) to yield the product **162** as a colorless oil (59.7 mg, 91% yield, 94% e.e.).

**HPLC** analysis: Chiralcel IC (*n*-hexane/*i*-PrOH = 95/5, flow rate 1.0 mL/min,  $\lambda$  = 254 nm),  $t_R$  (major) = 12.39 min,  $t_R$  (minor) = 17.83 min.

**$^1\text{H}$  NMR** (400 MHz,  $\text{CDCl}_3$ )  $\delta$  9.86 (s, 1H), 7.60 – 7.58 (m, 2H), 7.35 – 7.31 (m, 2H), 7.11 – 7.07 (m, 1H), 3.49 (q,  $J$  = 7.1 Hz, 1H), 2.13 – 2.10 (m, 1H), 1.54 – 1.49 (m, 1H), 1.43 – 1.33 (m, 6H), 1.28 – 1.21 (m, 6H), 1.18 – 1.06 (m, 3H), 0.83 (s, 6H).

**$^{13}\text{C}$  NMR** (100 MHz,  $\text{CDCl}_3$ )  $\delta$  174.7, 137.8, 128.9, 123.8, 119.1, 53.3, 50.7, 49.2, 49.0, 42.7, 42.6, 41.4, 32.33, 32.30, 30.1, 30.0, 21.6.

**HRMS** (ESI)  $m/z$  calcd. for  $\text{C}_{21}\text{H}_{31}\text{N}_2\text{O}$  [ $\text{M} + \text{H}$ ] $^+$  327.2431, found 327.2429.

**(*S*)-2-(Methyl(*S*)-3-(naphthalen-1-yloxy)-3-(thiophen-2-yl)propyl)amino)-*N*-phenylpropanamide (**163**)**

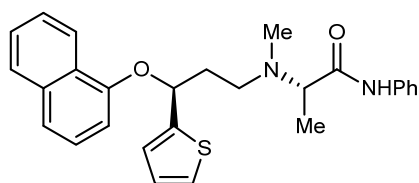

**163**

According to **General Procedure C** with 2-chloro-*N*-phenylpropanamide **E1** (54.9 mg, 0.30 mmol, 1.5 equiv.), duloxetine hydrochloride **A105** (66.6 mg, 0.20 mmol, 1.0 equiv.), and  $\text{Cs}_2\text{CO}_3$  (260.6 mg, 0.80 mmol, 4.0 equiv.) for 96 h, the reaction mixture was purified by preparative thin-layer chromatography on silica gel (petroleum ether/EtOAc = 1/2) to yield the product **163** as a colorless oil (60.5 mg, 68% yield, >20:1 d.r.). The diastereomeric ratio was determined by crude  $^1\text{H}$  NMR spectroscopy.

**$^1\text{H}$  NMR** (400 MHz,  $\text{CDCl}_3$ )  $\delta$  9.15 (s, 1H), 8.27 – 8.25 (m, 1H), 7.76 – 7.74 (m, 1H), 7.47 – 7.36 (m, 5H), 7.30 – 7.26 (m, 2H), 7.24 – 7.19 (m, 2H), 7.09 – 7.04 (m, 2H), 6.93 – 6.91 (m, 1H), 6.82 – 6.80 (m, 1H), 5.74 – 5.71 (m, 1H), 3.39 – 3.33 (m, 1H), 2.94 – 2.81 (m, 2H), 2.54 – 2.26 (m, 5H), 1.28 (d,  $J$  = 7.0 Hz, 3H).

**$^{13}\text{C}$  NMR** (100 MHz,  $\text{CDCl}_3$ )  $\delta$  171.8, 153.2, 144.7, 137.8, 134.6, 128.9, 127.5, 126.7, 126.4, 126.0, 125.6, 125.4, 124.9, 124.7, 123.9, 121.8, 120.9, 119.4, 106.8, 74.5, 63.8, 51.1, 37.9, 37.3, 9.2.

**HRMS** (ESI)  $m/z$  calcd. for  $\text{C}_{27}\text{H}_{29}\text{N}_2\text{O}_2\text{S}$  [ $\text{M} + \text{H}$ ] $^+$  445.1944, found 445.1944.

**(*S*)-2-((3-(10,11-Dihydro-5*H*-dibenzo[*a,d*][7]annulen-5-ylidene)propyl)(methyl)amino)-*N*-phenylpropanamide (**164**)**

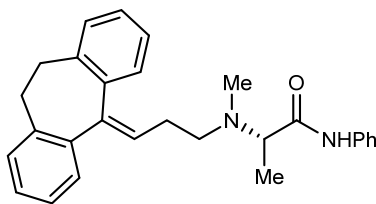

**164**

According to **General Procedure C** with 2-chloro-*N*-phenylpropanamide **E1** (54.9 mg, 0.30 mmol, 1.5 equiv.), nortriptyline hydrochloride **A106** (59.8 mg, 0.20 mmol, 1.0 equiv.), and

Cs<sub>2</sub>CO<sub>3</sub> (260.6 mg, 0.80 mmol, 4.0 equiv.) for 96 h, the reaction mixture was purified by preparative thin-layer chromatography on silica gel (petroleum ether/EtOAc = 1/2) to yield the product **164** as a colorless oil (41.3 mg, 50% yield, 92% e.e.).

**HPLC** analysis: Chiralcel ID (*n*-hexane/*i*-PrOH = 95/5, flow rate 0.5 mL/min,  $\lambda$  = 254 nm),  $t_R$  (minor) = 26.35 min,  $t_R$  (major) = 27.84 min.

**<sup>1</sup>H NMR** (400 MHz, CDCl<sub>3</sub>)  $\delta$  9.32 – 9.28 (m, 1H), 7.30 – 7.05 (m, 12H), 7.02 – 6.96 (m, 1H), 5.93 – 5.87 (m, 1H), 3.38 (q,  $J$  = 12.8 Hz, 1H), 3.28 – 3.22 (m, 2H), 2.99 – 2.72 (m, 2H), 2.57 – 2.28 (m, 4H), 2.10 (s, 3H), 1.22 (d,  $J$  = 7.0 Hz, 3H).

**<sup>13</sup>C NMR** (100 MHz, CDCl<sub>3</sub>)  $\delta$  172.2, 171.8, 144.7, 144.5, 140.8, 139.8, 139.4, 137.8, 137.0, 130.2, 128.9, 128.8, 128.6, 128.2, 128.0, 127.6, 127.3, 126.2, 125.7, 123.5, 118.7, 64.4, 63.6, 54.8, 52.4, 38.5, 36.7, 33.7, 32.0, 27.7, 10.6, 8.3.

**HRMS** (ESI)  $m/z$  calcd. for C<sub>28</sub>H<sub>31</sub>N<sub>2</sub>O [M + H]<sup>+</sup> 411.2431, found 411.2435.

**(S)-2-(Methyl((R)-3-phenyl-3-(*o*-tolylloxy)propyl)amino)-N-phenylpropanamide (165)**

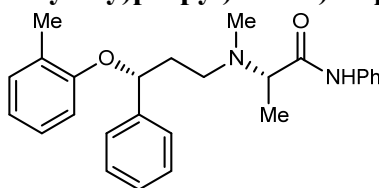

**165**

According to **General Procedure C** with 2-chloro-*N*-phenylpropanamide **E1** (54.9 mg, 0.30 mmol, 1.5 equiv.), atomoxetine hydrochloride **A107** (58.2 mg, 0.20 mmol, 1.0 equiv.), and Cs<sub>2</sub>CO<sub>3</sub> (260.6 mg, 0.80 mmol, 4.0 equiv.) for 96 h, the reaction mixture was purified by preparative thin-layer chromatography (petroleum ether/EtOAc = 1/2) to yield the product **165** as a colorless oil (66.0 mg, 82% yield, >20:1 d.r.). The diastereomeric ratio was determined by crude <sup>1</sup>H NMR spectroscopy.

**<sup>1</sup>H NMR** (400 MHz, CDCl<sub>3</sub>)  $\delta$  9.25 (s, 1H), 7.47 – 7.45 (m, 2H), 7.33 – 7.21 (m, 7H), 7.10 – 7.05 (m, 2H), 6.96 – 6.91 (m, 1H), 6.79 – 6.75 (m, 1H), 6.58 – 6.56 (m, 1H), 5.21 (dd,  $J$  = 8.6, 4.1 Hz, 1H), 3.56 – 3.24 (m, 1H), 2.92 – 2.65 (m, 2H), 2.33 (s, 3H), 2.27 (s, 3H), 2.25 – 2.11 (m, 2H), 1.29 (d,  $J$  = 7.0 Hz, 3H).

**<sup>13</sup>C NMR** (100 MHz, CDCl<sub>3</sub>)  $\delta$  171.9, 155.8, 141.7, 137.8, 130.7, 128.9, 128.7, 127.6, 126.9, 126.6, 125.6, 123.9, 120.4, 119.2, 112.6, 77.6, 63.2, 51.0, 38.3, 37.0, 16.4, 9.7.

**HRMS** (ESI)  $m/z$  calcd. for C<sub>26</sub>H<sub>31</sub>N<sub>2</sub>O<sub>2</sub> [M + H]<sup>+</sup> 403.2380, found 403.2381.

**(S)-2-(4-(2-Chlorodibenzo[*b,f*][1,4]oxazepin-11-yl)piperazin-1-yl)-N-phenylpropanamide (166)**

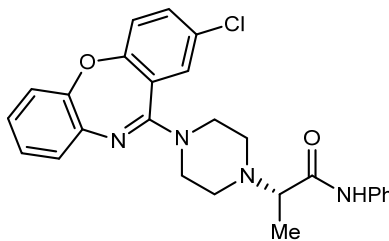

**166**

According to **General Procedure C** with 2-chloro-*N*-phenylpropanamide **E1** (54.9 mg, 0.30 mmol, 1.5 equiv.) and amoxapine **A108** (62.6 mg, 0.20 mmol, 1.0 equiv.) for 96 h, the reaction

mixture was purified by preparative thin-layer chromatography on silica gel (petroleum ether/EtOAc = 1/3) to yield the product **166** as a colorless oil (88.3 mg, 96% yield, 92% e.e.).

**HPLC** analysis: Chiralcel IG (*n*-hexane/*i*-PrOH = 80/20, flow rate 1.0 mL/min,  $\lambda$  = 254 nm),  $t_R$  (minor) = 15.23 min,  $t_R$  (major) = 17.76 min.

**$^1\text{H}$  NMR** (400 MHz,  $\text{CDCl}_3$ )  $\delta$  9.24 (s, 1H), 7.57 – 7.55 (m, 2H), 7.40 – 7.37 (m, 1H), 7.34 – 7.30 (m, 3H), 7.19 – 7.15 (m, 2H), 7.11 – 7.07 (m, 3H), 7.02 – 6.98 (m, 1H), 3.60 – 3.58 (m, 4H), 3.28 (q,  $J$  = 7.0 Hz, 1H), 2.77 – 2.68 (m, 4H), 1.36 (d,  $J$  = 7.0 Hz, 3H).

**$^{13}\text{C}$  NMR** (100 MHz,  $\text{CDCl}_3$ )  $\delta$  171.4, 159.2, 158.9, 151.7, 139.8, 137.6, 132.6, 130.2, 129.0, 128.9, 127.1, 125.8, 124.8, 124.0, 122.7, 120.1, 119.2, 64.5, 49.6, 47.8, 11.4.

**HRMS** (ESI)  $m/z$  calcd. for  $\text{C}_{26}\text{H}_{26}\text{ClN}_4\text{O}_2$   $[\text{M} + \text{H}]^+$  461.1739, found 461.1736.

**(*S*)-2-((3*S*,4*R*)-3-((benzo[*d*][1,3]dioxol-5-yloxy)methyl)-4-(4-fluorophenyl)piperidin-1-yl)-*N*-phenylpropanamide (**167**)**

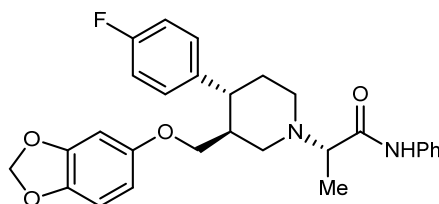

**167**

According to **General Procedure C** with 2-chloro-*N*-phenylpropanamide **E1** (54.9 mg, 0.30 mmol, 1.5 equiv.), paroxetine hydrochloride **A109** (73.0 mg, 0.20 mmol, 1.0 equiv.), and  $\text{Cs}_2\text{CO}_3$  (260.6 mg, 0.80 mmol, 4.0 equiv.) for 96 h, the reaction mixture was purified by flash column chromatography on silica gel (petroleum ether/EtOAc = 2/1) to yield the product **167** as a colorless oil (90.5 mg, 95% yield, >20:1 d.r.). The diastereomeric ratio was determined by crude  $^1\text{H}$  NMR spectroscopy.

**$^1\text{H}$  NMR** (400 MHz,  $\text{CDCl}_3$ )  $\delta$  9.33 (s, 1H), 7.59 – 7.56 (m, 2H), 7.36 – 7.32 (m, 2H), 7.22 – 7.17 (m, 2H), 7.13 – 7.09 (m, 1H), 7.03 – 6.97 (m, 2H), 6.58 (d,  $J$  = 8.4 Hz, 1H), 6.29 (d,  $J$  = 2.5 Hz, 1H), 6.09 (dd,  $J$  = 8.5, 2.5 Hz, 1H), 5.86 – 5.85 (m, 2H), 3.61 – 3.58 (m, 1H), 3.49 – 3.44 (m, 1H), 3.33 – 3.31 (m, 1H), 3.21 – 3.18 (m, 1H), 3.00 – 2.97 (m, 1H), 2.60 – 2.49 (m, 2H), 2.34 – 2.17 (m, 2H), 1.95 – 1.89 (m, 2H), 1.38 (d,  $J$  = 7.1 Hz, 3H).

**$^{13}\text{C}$  NMR** (100 MHz,  $\text{CDCl}_3$ )  $\delta$  171.8, 1621.6 (d,  $J$  = 243.3 Hz), 154.0, 148.1, 141.6, 139.0, 137.8, 129.0, 128.7 (d,  $J$  = 7.7 Hz), 124.0, 119.5, 115.5 (d,  $J$  = 21.3 Hz), 107.8, 105.5, 101.0, 97.9, 69.2, 64.8, 53.4, 51.4, 43.8, 42.7, 34.8, 11.2.

**$^{19}\text{F}$  NMR** (376 MHz,  $\text{CDCl}_3$ )  $\delta$  -116.04 (s, 1F).

**HRMS** (ESI)  $m/z$  calcd. for  $\text{C}_{28}\text{H}_{30}\text{FN}_2\text{O}_4$   $[\text{M} + \text{H}]^+$  477.2184, found 477.2190.

**(*S*)-2-(4-(2-((2,4-Dimethylphenyl)thio)phenyl)piperazin-1-yl)-*N*-phenylpropanamide (**168**)**

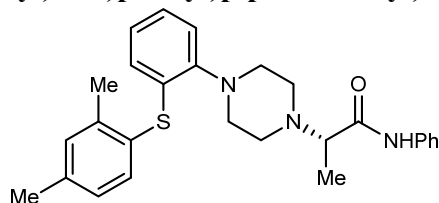

**168**

According to **General Procedure C** with 2-chloro-*N*-phenylpropanamide **E1** (54.9 mg, 0.30

mmol, 1.5 equiv.) and vortioxetine **A110** (59.6 mg, 0.20 mmol, 1.0 equiv.) for 96 h, the reaction mixture was purified by preparative thin-layer chromatography on silica gel (petroleum ether/EtOAc = 1/2) to yield the product **168** as a colorless oil (74.9 mg, 84% yield, 92% e.e.).

**HPLC** analysis: Chiralcel IC (*n*-hexane/*i*-PrOH = 80/20, flow rate 1.0 mL/min,  $\lambda$  = 254 nm),  $t_R$  (major) = 11.36 min,  $t_R$  (minor) = 12.64 min.

**$^1\text{H}$  NMR** (400 MHz,  $\text{CDCl}_3$ )  $\delta$  9.41 (s, 1H), 7.62 – 7.59 (m, 2H), 7.38 – 7.31 (m, 3H), 7.16 – 7.13 (m, 1H), 7.12 – 7.06 (m, 3H), 7.03 – 7.01 (m, 1H), 6.91 – 6.85 (m, 1H), 6.55 – 6.53 (m, 1H), 3.29 (q,  $J$  = 7.0 Hz, 1H), 3.23 – 3.11 (m, 4H), 2.86 – 2.81 (m, 2H), 2.78 – 2.73 (m, 2H), 2.35 (s, 3H), 2.31 (s, 3H), 1.37 (d,  $J$  = 7.0 Hz, 3H).

**$^{13}\text{C}$  NMR** (100 MHz,  $\text{CDCl}_3$ )  $\delta$  171.8, 148.7, 142.3, 139.2, 137.9, 136.0, 134.5, 131.6, 129.0, 127.8, 126.3, 125.4, 124.5, 123.9, 119.7, 119.2, 64.5, 52.0, 50.1, 21.1, 20.5, 11.4.

**HRMS** (ESI)  $m/z$  calcd. for  $\text{C}_{27}\text{H}_{32}\text{N}_3\text{OS}$  [ $\text{M} + \text{H}$ ] $^+$  446.2261, found 446.2261.

**(*S*)-2-(4-(4-((5-Chloro-4-((2-(isopropylsulfonyl)phenyl)amino)pyrimidin-2-yl)amino)-5-isopropoxy-2-methylphenyl)piperidin-1-yl)-*N*-phenylpropanamide (169)**

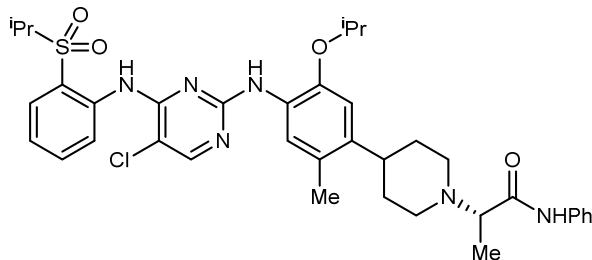

**169**

According to **General Procedure C** with 2-chloro-*N*-phenylpropanamide **E1** (54.9 mg, 0.30 mmol, 1.5 equiv.) and ceritinib **A111** (111.4 mg, 0.20 mmol, 1.0 equiv.) for 96 h, the reaction mixture was purified by preparative thin-layer chromatography on silica gel (petroleum ether/EtOAc = 1/1) to yield the product **169** as a colorless oil (125.5 mg, 89% yield, 93% e.e.).

**HPLC** analysis: Chiralcel AD (*n*-hexane/*i*-PrOH = 80/20, flow rate 1.0 mL/min,  $\lambda$  = 254 nm),  $t_R$  (major) = 16.40 min,  $t_R$  (minor) = 18.99 min.

**$^1\text{H}$  NMR** (400 MHz,  $\text{CDCl}_3$ )  $\delta$  9.52 (s, 1H), 9.36 (s, 1H), 8.59 (d,  $J$  = 8.4 Hz, 1H), 8.16 (s, 1H), 8.03 (s, 1H), 7.94 – 7.91 (m, 1H), 7.65 – 7.58 (m, 4H), 7.36 – 7.32 (m, 2H), 7.28 – 7.24 (m, 1H), 7.12 – 7.08 (m, 1H), 6.83 (s, 1H), 4.64 – 4.58 (m, 1H), 3.31 – 3.23 (m, 2H), 3.02 – 2.93 (m, 2H), 2.75 – 2.67 (m, 1H), 2.62 – 2.56 (m, 1H), 2.40 – 2.34 (m, 1H), 2.18 (s, 3H), 1.90 – 1.65 (m, 4H), 1.41 (d,  $J$  = 6.1 Hz, 6H), 1.36 (d,  $J$  = 7.0 Hz, 3H), 1.31 (d,  $J$  = 6.9 Hz, 6H).

**$^{13}\text{C}$  NMR** (100 MHz,  $\text{CDCl}_3$ )  $\delta$  172.0, 157.3, 155.21, 155.16, 144.6, 138.3, 137.8, 137.1, 134.5, 131.1, 128.9, 127.7, 127.2, 124.7, 123.8, 123.5, 123.0, 120.7, 119.3, 111.0, 105.6, 71.7, 64.7, 55.3, 53.7, 48.1, 37.9, 33.3, 33.2, 22.2, 18.8, 15.2, 10.9.

**HRMS** (ESI)  $m/z$  calcd. for  $\text{C}_{37}\text{H}_{46}\text{ClN}_6\text{O}_4\text{S}$  [ $\text{M} + \text{H}$ ] $^+$  705.2984, found 705.2982.

**(*S*)-2-((*R*)-8-Chloro-1-methyl-1,2,4,5-tetrahydro-3*H*-benzo[*d*]azepin-3-yl)-*N*-phenylpropanamide (170)**

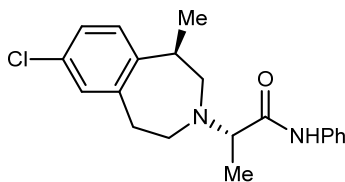

170

According to **General Procedure C** with 2-chloro-*N*-phenylpropanamide **E1** (54.9 mg, 0.30 mmol, 1.5 equiv.), lorcaserin hydrochloride **A99** (46.2 mg, 0.20 mmol, 1.0 equiv.), and Cs<sub>2</sub>CO<sub>3</sub> (260.6 mg, 0.80 mmol, 4.0 equiv.) for 96 h, the reaction mixture was purified by flash column chromatography on silica gel (petroleum ether/EtOAc = 1/1) to yield the product **170** as a colorless oil (58.0 mg, 85% yield, >20:1 d.r.). The diastereomeric ratio was determined by crude <sup>1</sup>H NMR spectroscopy.

<sup>1</sup>H NMR (400 MHz, CDCl<sub>3</sub>) δ 9.19 (s, 1H), 7.47 – 7.45 (m, 2H), 7.33 – 7.29 (m, 2H), 7.16 – 7.14 (m, 2H), 7.09 – 7.03 (m, 2H), 3.44 (q, *J* = 7.1 Hz, 1H), 3.18 – 3.10 (m, 1H), 3.07 – 2.91 (m, 2H), 2.86 – 2.68 (m, 3H), 2.53 – 2.48 (m, 1H), 1.39 (d, *J* = 7.2 Hz, 3H), 1.25 (d, *J* = 7.0 Hz, 3H).

<sup>13</sup>C NMR (100 MHz, CDCl<sub>3</sub>) δ 171.4, 146.1, 138.4, 137.8, 132.4, 130.6, 129.0, 126.6, 126.2, 123.8, 118.8, 65.7, 57.5, 52.1, 38.9, 35.3, 17.9, 9.2.

HRMS (ESI) *m/z* calcd. for C<sub>20</sub>H<sub>24</sub>ClN<sub>2</sub>O [M + H]<sup>+</sup> 343.1572, found 343.1576.

**(S)-2-(4-(Isoquinolin-5-ylsulfonyl)-1,4-diazepan-1-yl)-*N*-phenylpropanamide (171)**

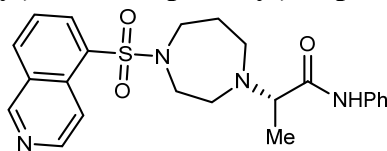

171

According to **General Procedure C** with 2-chloro-*N*-phenylpropanamide **E1** (54.9 mg, 0.30 mmol, 1.5 equiv.), fasudil dihydrochloride **A112** (72.6 mg, 0.20 mmol, 1.0 equiv.), and Cs<sub>2</sub>CO<sub>3</sub> (325.8 mg, 1.00 mmol, 5.0 equiv.) for 96 h, the reaction mixture was purified by preparative thin-layer chromatography on silica gel (EtOAc) to yield the product **171** as a colorless oil (64.5 mg, 74% yield, 92% e.e.).

HPLC analysis: Chiralcel OD3 (*n*-hexane/*i*-PrOH = 80/20, flow rate 0.8 mL/min, λ = 254 nm), *t*<sub>R</sub> (minor) = 18.06 min, *t*<sub>R</sub> (major) = 21.00 min.

<sup>1</sup>H NMR (400 MHz, CDCl<sub>3</sub>) δ 9.40 (s, 1H), 9.36 (d, *J* = 1.0 Hz, 1H), 8.72 – 8.68 (m, 1H), 8.41 – 8.37 (m, 2H), 8.22 – 8.19 (m, 1H), 7.71 – 7.65 (m, 3H), 7.36 – 7.31 (m, 2H), 7.11 – 7.07 (m, 1H), 3.58 – 3.38 (m, 5H), 2.95 – 2.78 (m, 3H), 2.74 – 2.67 (m, 1H), 2.01 – 1.90 (m, 2H), 1.31 (d, *J* = 6.9 Hz, 3H).

<sup>13</sup>C NMR (100 MHz, CDCl<sub>3</sub>) δ 171.3, 153.3, 145.1, 138.0, 134.1, 133.6, 133.5, 131.5, 129.1, 128.9, 125.8, 123.8, 119.3, 117.3, 65.5, 53.4, 51.7, 48.2, 47.2, 29.9, 9.5.

HRMS (ESI) *m/z* calcd. for C<sub>23</sub>H<sub>27</sub>N<sub>4</sub>O<sub>3</sub>S [M + H]<sup>+</sup> 439.1798, found 439.1800.

**(S)-2-((1*R*,5*S*)-8-Oxo-1,5,6,8-tetrahydro-2*H*-1,5-methanopyrido[1,2-*a*][1,5]diazocin-3(4*H*)-yl)-*N*-phenylpropanamide (172)**

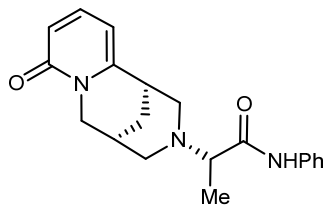

**172**

According to **General Procedure C** with 2-chloro-*N*-phenylpropanamide **E1** (54.9 mg, 0.30 mmol, 1.5 equiv.) and cytosine **A113** (38.0 mg, 0.20 mmol, 1.0 equiv.) for 96 h, the reaction mixture was purified by preparative thin-layer chromatography on silica gel (EtOAc) to yield the product **172** as a colorless oil (43.9 mg, 65% yield, >20:1 d.r.). The diastereomeric ratio was determined by crude  $^1\text{H}$  NMR spectroscopy.

$^1\text{H}$  NMR (400 MHz,  $\text{CDCl}_3$ )  $\delta$  8.20 (s, 1H), 7.28 – 7.17 (m, 5H), 7.06 – 7.00 (m, 1H), 6.57 – 6.54 (m, 1H), 5.99 – 5.97 (m, 1H), 4.28 – 4.24 (m, 1H), 4.03 – 3.97 (m, 1H), 3.26 (q,  $J$  = 7.0 Hz, 1H), 3.07 – 3.04 (m, 1H), 2.97 – 2.93 (m, 1H), 2.88 – 2.85 (m, 1H), 2.79 – 2.74 (m, 1H), 2.63 – 2.55 (m, 2H), 1.99 – 1.93 (m, 1H), 1.88 – 1.82 (m, 1H), 1.25 (d,  $J$  = 7.1 Hz, 3H).

$^{13}\text{C}$  NMR (100 MHz,  $\text{CDCl}_3$ )  $\delta$  170.4, 163.4, 150.6, 139.2, 137.2, 128.6, 123.9, 119.4, 117.1, 105.0, 63.8, 59.2, 54.1, 50.1, 34.9, 28.0, 25.5, 8.6.

HRMS (ESI)  $m/z$  calcd. for  $\text{C}_{20}\text{H}_{24}\text{N}_3\text{O}_2$   $[\text{M} + \text{H}]^+$  338.1863, found 338.1863.

### Catalytic enantioselective synthesis of Xadago

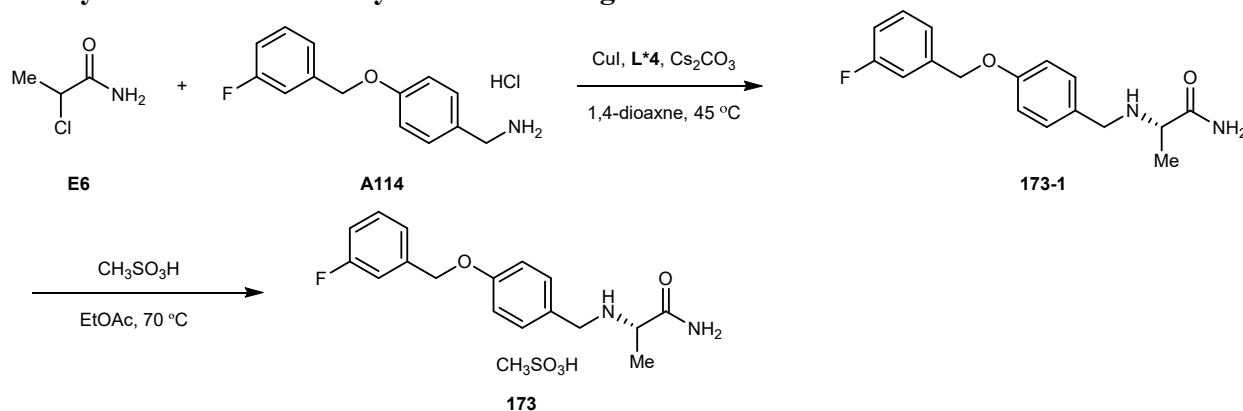

### (*S*)-2-((4-((3-Fluorobenzyl)oxy)benzyl)amino)propanamide (**173-1**)

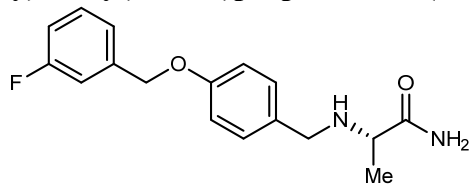

**173-1**

According to **General Procedure A** with 2-chloropropanamide **E6** (32.1 mg, 0.30 mmol, 1.5 equiv.), (4-((3-fluorobenzyl)oxy)phenyl)methanamine hydrochloride **A114** (53.4 mg, 0.20 mmol, 1.0 equiv.), and  $\text{Cs}_2\text{CO}_3$  (260.6 mg, 0.80 mmol, 4.0 equiv.) for 72 h, the reaction mixture was purified by preparative thin-layer chromatography on silica gel (EtOAc/ $\text{CH}_3\text{OH}$  = 25/1) to yield the product **173-1** as a white solid (44.4 mg, 73% yield, 94% e.e.).

HPLC analysis: Chiralcel OD3 (*n*-hexane/*i*-PrOH = 80/20, flow rate 0.8 mL/min,  $\lambda$  = 214 nm),  $t_R$  (major) = 13.55 min,  $t_R$  (minor) = 23.90 min.



**<sup>1</sup>H NMR** (400 MHz, CDCl<sub>3</sub>) δ 7.36 – 7.31 (m, 1H), 7.23 – 7.09 (m, 5H), 7.03 – 6.98 (m, 1H), 6.94 – 6.90 (m, 2H), 6.06 (s, 1H), 5.04 (s, 2H), 3.70 (q, *J* = 13.0 Hz, 2H), 3.23 (q, *J* = 6.9 Hz, 1H), 1.89 (s, 1H), 1.33 (d, *J* = 6.9 Hz, 3H).

**<sup>13</sup>C NMR** (100 MHz, CDCl<sub>3</sub>) δ 178.2, 162.9 (d, *J* = 244.8 Hz), 157.7, 139.5 (d, *J* = 7.2 Hz), 132.1, 130.1 (d, *J* = 8.1 Hz), 129.2, 122.6 (d, *J* = 3.0 Hz), 114.8, 114.7 (d, *J* = 20.3 Hz), 114.1 (d, *J* = 22.0 Hz), 69.1 (d, *J* = 1.8 Hz), 57.5, 51.8, 19.6.

**<sup>19</sup>F NMR** (376 MHz, CDCl<sub>3</sub>) δ -112.76 (s, 1F).

**HRMS** (ESI) *m/z* calcd. for C<sub>17</sub>H<sub>20</sub>FN<sub>2</sub>O<sub>2</sub> [M + H]<sup>+</sup> 303.1503, found 303.1504.

**(S)-1-Amino-N-(4-((3-fluorobenzyl)oxy)benzyl)-1-oxopropan-2-aminium methanesulfonate (173)**

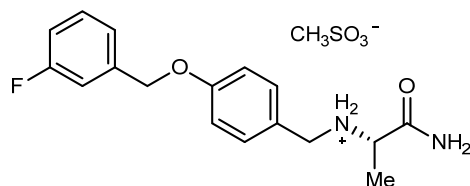

**173**

To a solution of **173-1** (30.2 mg, 0.1 mmol, 1.0 equiv.) in EtOAc (1.0 mL) was added methanesulfonic acid (8.0 μL, 0.12 mmol, 1.2 equiv.) at 70 °C. After being stirred for 2 h at 70 °C, the reaction mixture was cooled down to room temperature and filtered. The solid was washed with EtOAc (5 mL) and dried in vacuo to yield **173** as a white solid (33.9 mg, 85% yield).

**<sup>1</sup>H NMR** (400 MHz, DMSO-*d*<sub>6</sub>) δ 9.02 (s, 2H), 7.93 (s, 1H), 7.63 (s, 1H), 7.47 – 7.40 (m, 3H), 7.30 – 7.26 (m, 2H), 7.18 – 7.13 (m, 1H), 7.08 – 7.06 (m, 2H), 5.17 (s, 2H), 4.06 – 3.95 (m, 2H), 3.79 – 3.74 (m, 1H), 2.33 (s, 3H), 1.42 (d, *J* = 6.9 Hz, 3H).

**<sup>13</sup>C NMR** (100 MHz, DMSO-*d*<sub>6</sub>) δ 171.0, 162.7 (d, *J* = 242.0 Hz), 159.0, 140.4 (d, *J* = 7.2 Hz), 132.2, 131.0 (d, *J* = 8.2 Hz), 124.4, 124.0 (d, *J* = 2.8 Hz), 115.4, 115.1 (d, *J* = 20.5 Hz), 114.7 (d, *J* = 21.7 Hz), 68.8 (d, *J* = 21.3 Hz), 54.6, 48.4, 40.2, 16.4.

**<sup>19</sup>F NMR** (376 MHz, DMSO-*d*<sub>6</sub>) δ -113.11 (s, 1F).

**Modular construction of hybrid chiral amine-containing drug molecules**

**The synthesis of 174-176**

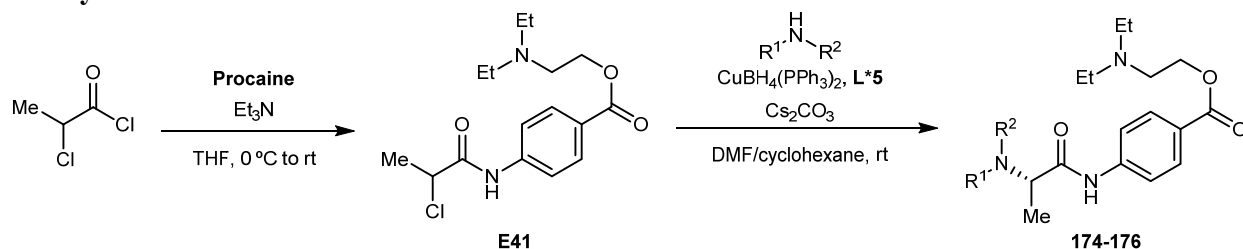

**2-(Diethylamino)ethyl 4-(2-chloropropanamido)benzoate (E41)**

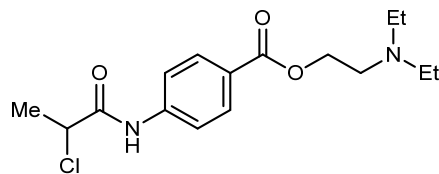

**E41**

According to **General procedure 1** with 2-chloropropanoyl chloride (1.51 g, 12.0 mmol, 1.2 equiv.) and procaine (2.36 g, 10.0 mmol, 1.0 equiv.), the reaction mixture was purified by column chromatography on silica gel (CH<sub>2</sub>Cl<sub>2</sub>/CH<sub>3</sub>OH = 25/1) to yield the product **E41** as a yellowish oil (3.07 g, 94% yield).

**<sup>1</sup>H NMR** (400 MHz, CDCl<sub>3</sub>) δ 9.19 (s, 1H), 8.00 – 7.97 (m, 2H), 7.73 – 7.71 (m, 2H), 4.67 (q, *J* = 7.0 Hz, 1H), 4.56 – 4.52 (m, 2H), 3.13 – 3.10 (m, 2H), 2.90 (q, *J* = 7.1 Hz, 4H), 1.79 (d, *J* = 6.2 Hz, 3H), 1.20 (t, *J* = 7.2 Hz, 6H).

**<sup>13</sup>C NMR** (100 MHz, CDCl<sub>3</sub>) δ 168.1 165.5, 142.0, 130.6, 125.1, 119.2, 67.8, 61.1, 50.1, 47.2, 25.4, 10.2.

**HRMS** (ESI) *m/z* calcd. for C<sub>16</sub>H<sub>24</sub>ClN<sub>2</sub>O<sub>3</sub> [*M* + *H*]<sup>+</sup> 327.1470, found 327.1469.

**2-(Diethylamino)ethyl (S)-4-(2-(4-(3-chlorodibenzo[*b,f*][1,4]oxazepin-11-yl)piperazin-1-yl)propanamido)benzoate (174)**

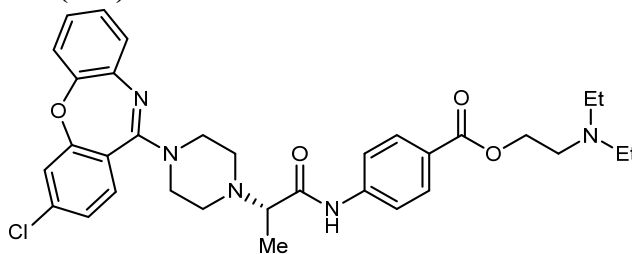

**174**

According to **General Procedure C** with 2-(diethylamino)ethyl 4-(2-chloropropanamido)benzoate **E41** (97.8 mg, 0.30 mmol, 1.5 equiv.), amoxapine **A108** (62.6 mg, 0.20 mmol, 1.0 equiv.) for 96 h, the reaction mixture was purified by preparative thin-layer chromatography on silica gel (CH<sub>2</sub>Cl<sub>2</sub>/CH<sub>3</sub>OH = 25/1) to yield the product **174** as a colorless oil (99.1 mg, 82% yield, 86% e.e.).

**HPLC** analysis: Chiralcel IG (*n*-hexane/*i*-PrOH = 50/50, flow rate 1.0 mL/min, λ = 254 nm), *t<sub>R</sub>* (minor) = 19.87 min, *t<sub>R</sub>* (major) = 23.74 min.

**<sup>1</sup>H NMR** (400 MHz, CDCl<sub>3</sub>) δ 9.48 (s, 1H), 8.03 – 7.99 (m, 2H), 7.65 – 7.62 (m, 2H), 7.41 – 7.39 (m, 1H), 7.33 – 7.32 (m, 1H), 7.21 – 7.14 (m, 2H), 7.12 – 7.07 (m, 2H), 7.04 – 6.99 (m, 1H), 4.38 (t, *J* = 6.2 Hz, 2H), 3.74 – 3.45 (m, 4H), 3.33 (q, *J* = 7.0 Hz, 1H), 2.87 – 2.71 (m, 6H), 2.62 (q, *J* = 7.1 Hz, 4H), 1.38 (d, *J* = 7.0 Hz, 3H), 1.07 (t, *J* = 7.1 Hz, 6H).

**<sup>13</sup>C NMR** (100 MHz, CDCl<sub>3</sub>) δ 171.7, 166.0, 159.3, 159.0, 151.8, 141.8, 139.8, 132.7, 130.9, 130.3, 128.9, 127.1, 125.8, 125.6, 124.9, 124.8, 122.8, 120.1, 118.4, 64.6, 63.3, 51.0, 49.6, 47.9, 47.8, 12.0, 11.1.

**HRMS** (ESI) *m/z* calcd. for C<sub>33</sub>H<sub>39</sub>ClN<sub>5</sub>O<sub>4</sub> [*M* + *H*]<sup>+</sup> 604.2685, found 604.2684.

**2-(Diethylamino)ethyl 4-((S)-2-((3*S*,4*R*)-3-((benzo[*d*][1,3]dioxol-5-yloxy)methyl)-4-(4-fluorophenyl)piperidin-1-yl)propanamido)benzoate (175)**

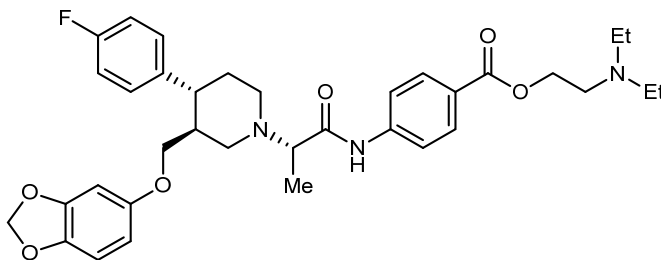

175

According to **General Procedure C** with 2-(diethylamino)ethyl 4-(2-chloropropanamido)benzoate **E41** (97.8 mg, 0.30 mmol, 1.5 equiv.), paroxetine hydrochloride **A109** (73.0 mg, 0.20 mmol, 1.0 equiv.), and  $\text{Cs}_2\text{CO}_3$  (260.6 mg, 0.80 mmol, 4.0 equiv.) for 96 h, the reaction mixture was purified by preparative thin-layer chromatography on silica gel ( $\text{CH}_2\text{Cl}_2/\text{CH}_3\text{OH} = 25/1$ ) to yield the product **175** as a colorless oil (93.0 mg, 75% yield, 13:1 d.r.). The diastereomeric ratio was determined by crude  $^1\text{H}$  NMR spectroscopy.

$^1\text{H}$  NMR (400 MHz,  $\text{CDCl}_3$ )  $\delta$  9.53 (s, 1H), 8.05 – 8.01 (m, 2H), 7.66 – 7.62 (m, 2H), 7.22 – 7.18 (m, 2H), 7.05 – 6.99 (m, 2H), 6.60 – 6.58 (m, 1H), 6.31 (d,  $J = 2.5$  Hz, 0.07H), 6.28 (d,  $J = 2.5$  Hz, 0.93H), 6.09 – 6.06 (m, 1H), 5.87 (s, 2H), 4.42 (t,  $J = 6.2$  Hz, 2H), 3.62 – 3.59 (m, 1H), 3.49 – 3.45 (m, 1H), 3.33 (q,  $J = 7.0$  Hz, 1H), 3.17 – 3.13 (m, 1H), 2.98 – 2.95 (m, 1H), 2.90 (t,  $J = 6.2$  Hz, 2H), 2.68 (q,  $J = 7.2$  Hz, 4H), 2.62 – 2.49 (m, 2H), 2.29 (t,  $J = 11.0$  Hz, 1H), 2.22 – 2.15 (m, 1H), 1.95 – 1.89 (m, 2H), 1.37 (d,  $J = 7.0$  Hz, 3H), 1.10 (t,  $J = 7.1$  Hz, 6H).

$^{13}\text{C}$  NMR (100 MHz,  $\text{CDCl}_3$ )  $\delta$  172.3, 165.9, 161.6 (d,  $J = 243.3$  Hz), 153.8, 148.1, 142.0, 141.6, 138.9 (d,  $J = 3.3$  Hz), 130.8, 128.7 (d,  $J = 7.8$  Hz), 125.2, 118.6, 114.0 (d,  $J = 20.9$  Hz), 107.7, 105.4, 101.0, 97.8, 69.1, 64.8, 62.5, 53.4, 51.2, 50.7, 47.6, 43.8, 42.6, 34.9, 11.4, 10.7.

$^{19}\text{F}$  NMR (376 MHz,  $\text{CDCl}_3$ )  $\delta$  -115.94 (s, 0.07F), -115.96 (s, 0.93F).

HRMS (ESI)  $m/z$  calcd. for  $\text{C}_{35}\text{H}_{43}\text{FN}_3\text{O}_6$   $[\text{M} + \text{H}]^+$  620.3130, found 620.3131.

## 2-(Diethylamino)ethyl 4-((*S*)-2-(methyl(*R*)-3-phenyl-3-(o-tolyloxy)propyl)amino)propanamido)benzoate (176)

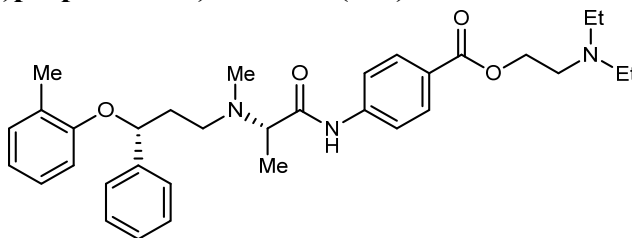

176

According to **General Procedure C** with 2-(diethylamino)ethyl 4-(2-chloropropanamido)benzoate **E41** (97.8 mg, 0.30 mmol, 1.5 equiv.), atomoxetine hydrochloride **A107** (58.2 mg, 0.20 mmol, 1.0 equiv.), and  $\text{Cs}_2\text{CO}_3$  (260.6 mg, 0.80 mmol, 4.0 equiv.) for 96 h, the reaction mixture was purified by preparative thin-layer chromatography on silica gel ( $\text{CH}_2\text{Cl}_2/\text{CH}_3\text{OH} = 25/1$ ) to yield the product **176** as a colorless oil (85.1 mg, 78% yield, 15:1 d.r.). The diastereomeric ratio was determined by crude  $^1\text{H}$  NMR spectroscopy.

$^1\text{H}$  NMR (400 MHz,  $\text{CDCl}_3$ )  $\delta$  9.43 (s, 0.94H), 9.34 (s, 0.06H), 7.96 – 7.92 (m, 2H), 7.50 – 7.43 (m, 2H), 7.33 – 7.30 (m, 4H), 7.25 – 7.21 (m, 1H), 7.09 – 7.04 (m, 1H), 6.96 – 6.91 (m, 1H), 6.79 – 6.76 (m, 1H), 6.59 – 6.55 (m, 1H), 5.22 – 5.20 (m, 1H), 4.51 (t,  $J = 6.0$  Hz, 2H), 3.40 –

3.35 (m, 1H), 3.02 (t,  $J = 6.0$  Hz, 2H), 2.81 (q,  $J = 7.2$  Hz, 4H), 2.76 – 2.69 (m, 2H), 2.31 (s, 3H), 2.25 (s, 3H), 2.21 – 2.04 (m, 2H), 1.27 (d,  $J = 7.0$  Hz, 3H), 1.17 (t,  $J = 7.2$  Hz, 6H).

$^{13}\text{C}$  NMR (100 MHz,  $\text{CDCl}_3$ )  $\delta$  172.4, 165.9, 155.8, 142.1, 141.7, 130.8, 130.7, 128.7, 127.6, 126.9, 126.6, 125.5, 124.8, 120.4, 118.4, 112.5, 77.5, 63.3, 61.9, 50.8, 50.5, 47.5, 38.3, 37.1, 16.4, 11.0, 9.2.

HRMS (ESI)  $m/z$  calcd. for  $\text{C}_{33}\text{H}_{44}\text{N}_3\text{O}_4$   $[\text{M} + \text{H}]^+$  546.3326, found 546.3328.

### The synthesis of 177

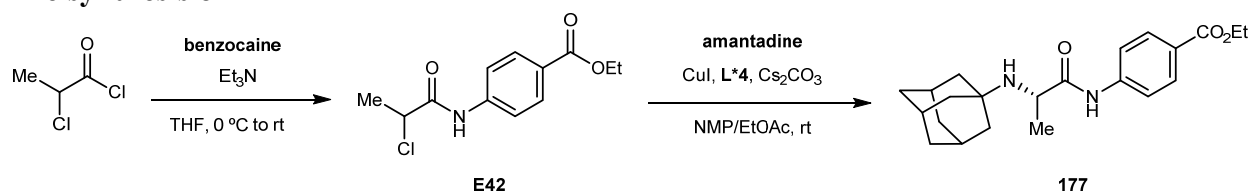

### Ethyl 4-(2-chloropropanamido)benzoate (E42)

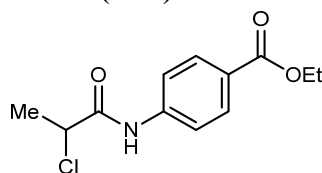

**E42**

According to **General procedure 1** with 2-chloropropanoyl chloride (1.51 g, 12.0 mmol, 1.2 equiv.) and benzocaine (1.65 g, 10.0 mmol, 1.0 equiv.), the reaction mixture was purified by column chromatography on silica gel (petroleum ether/EtOAc = 5/1) to yield the product **E42** as a white solid (2.43 g, 95% yield).

$^1\text{H}$  NMR (400 MHz,  $\text{CDCl}_3$ )  $\delta$  8.49 (s, 1H), 8.05 – 8.03 (m, 2H), 7.67 – 7.64 (m, 2H), 4.56 (q,  $J = 7.0$  Hz, 1H), 4.37 (q,  $J = 7.1$  Hz, 2H), 1.83 (d,  $J = 7.1$ , 3H), 1.39 (t,  $J = 7.1$  Hz, 3H).

$^{13}\text{C}$  NMR (100 MHz,  $\text{CDCl}_3$ )  $\delta$  167.6, 166.0, 141.0, 130.8, 126.7, 119.0, 61.0, 56.0, 22.4, 14.3.

HRMS (ESI)  $m/z$  calcd. for  $\text{C}_{12}\text{H}_{15}\text{ClNO}_3$   $[\text{M} + \text{H}]^+$  256.0735, found 256.0735.

### Ethyl 4-((S)-2-((adamantan-1-yl)amino)propanamido)benzoate (177)

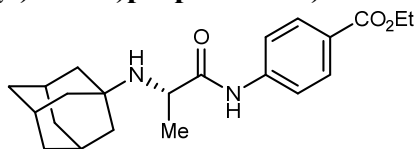

**177**

According to **General Procedure B** with ethyl 4-(2-chloropropanamido)benzoate **E42** (76.5 mg, 0.30 mmol, 1.5 equiv.), amantadine **A76** (30.2 mg, 0.20 mmol, 1.0 equiv.), **L\*4** (15.4 mg, 0.03 mmol, 15 mol%), anhydrous NMP (2.8 mL), and EtOAc (1.2 mL) for 96 h, the reaction mixture was purified by flash column chromatography on silica gel (petroleum ether/EtOAc = 2/1) to yield the product **177** as a white solid (66.7 mg, 90% yield, 88% e.e.).

**HPLC** analysis: Chiralcel IF ( $n$ -hexane/ $i$ -PrOH = 80/20, flow rate 1.0 mL/min,  $\lambda = 254$  nm),  $t_R$  (minor) = 11.68 min,  $t_R$  (major) = 19.55 min.

$^1\text{H}$  NMR (400 MHz,  $\text{CDCl}_3$ )  $\delta$  10.11 (s, 1H), 8.03 – 8.01 (m, 2H), 7.68 – 7.66 (m, 2H), 4.36 (q,  $J = 7.1$  Hz, 2H), 3.55 (q,  $J = 7.3$  Hz, 1H), 2.09 – 2.06 (m, 3H), 1.71 – 1.65 (m, 6H), 1.60 – 1.57 (m, 6H), 1.41 – 1.37 (m, 7H).

$^{13}\text{C}$  NMR (100 MHz,  $\text{CDCl}_3$ )  $\delta$  175.2, 166.2, 141.8, 130.8, 125.5, 118.2, 60.7, 51.6, 50.6, 42.9,

36.3, 29.3, 21.5, 14.3.

**HRMS** (ESI)  $m/z$  calcd. for  $C_{22}H_{31}N_2O_3$   $[M + H]^+$  371.2329, found 371.2329.

### The synthesis of 178-179

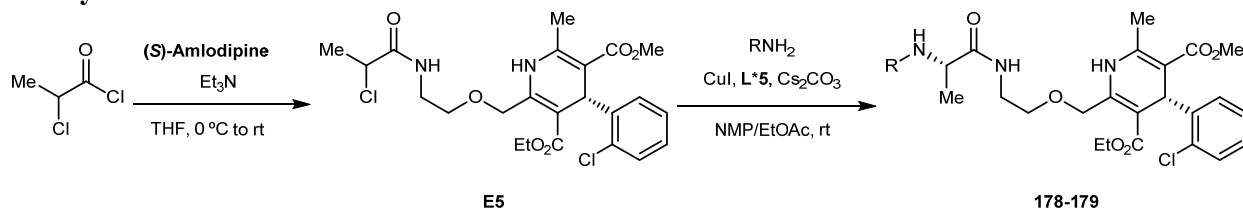

### 3-Ethyl 5-methyl (4S)-4-(2-chlorophenyl)-2-((2-(2-chloropropanamido)ethoxy)methyl)-6-methyl-1,4-dihydropyridine-3,5-dicarboxylate (**E5**)

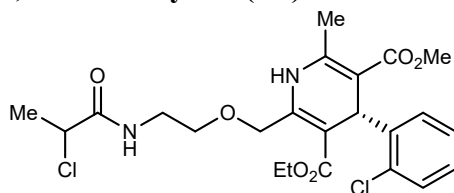

**E5**

According to **General procedure 1** with 2-chloropropanoyl chloride (1.51 g, 12.0 mmol, 1.2 equiv.) and (S)-amlodipine (4.08 g, 10.0 mmol, 1.0 equiv.), the reaction mixture was purified by column chromatography on silica gel (petroleum ether/EtOAc = 1/1) to yield the product **E5** as a yellowish oil (4.83 g, 97% yield).

**$^1H$  NMR** (400 MHz,  $CDCl_3$ )  $\delta$  7.39 – 7.36 (m, 1H), 7.24 – 7.22 (m, 1H), 7.19 – 7.11 (m, 2H), 7.06 – 7.02 (m, 1H), 6.93 (s, 1H), 5.41 (s, 1H), 4.80 – 4.75 (m, 1H), 4.71 – 4.66 (m, 1H), 4.45 (q,  $J$  = 7.1 Hz, 1H), 4.09 – 3.99 (m, 2H), 3.72 – 3.65 (m, 2H), 3.62 (s, 3H), 3.60 – 3.53 (m, 2H), 2.37 (s, 3H), 1.76 (dd,  $J$  = 7.0, 3.1 Hz, 3H), 1.18 (t,  $J$  = 7.1 Hz, 3H).

**$^{13}C$  NMR** (100 MHz,  $CDCl_3$ )  $\delta$  170.1, 170.0, 168.0, 167.1, 145.673, 145.667, 144.81, 144.78, 144.2, 144.1, 132.2, 131.40, 131.38, 129.2, 127.3, 126.82, 126.80, 103.81, 103.78, 101.6, 101.5, 70.0, 68.0, 59.8, 56.0, 50.7, 39.6, 37.0, 22.6, 19.34, 19.28, 14.2.

**HRMS** (ESI)  $m/z$  calcd. for  $C_{23}H_{28}Cl_2N_2NaO_6$   $[M + Na]^+$  521.1217, found 521.1220.

### 3-Ethyl 5-methyl (S)-4-(2-chlorophenyl)-2-((S)-2-((3,5-dimethyladamantan-1-yl)amino)propanamido)ethoxy)methyl)-6-methyl-1,4-dihydropyridine-3,5-dicarboxylate (**178**)

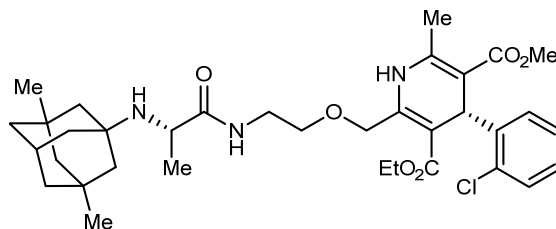

**178**

According to **General Procedure B** with 3-ethyl 5-methyl (4S)-4-(2-chlorophenyl)-2-((2-(2-chloropropanamido)ethoxy)methyl)-6-methyl-1,4-dihydropyridine-3,5-dicarboxylate **E5** (149.4 mg, 0.30 mmol, 1.5 equiv.), memantine hydrochloride **A104** (43.0 mg, 0.20 mmol, 1.0 equiv.), **L\*4** (15.4 mg, 0.03 mmol, 15 mol%),  $Cs_2CO_3$  (260.6 mg, 0.80 mmol, 4.0 equiv.), anhydrous

NMP (2.8 mL), and EtOAc (1.2 mL) for 96 h, the reaction mixture was purified by preparative thin-layer chromatography on silica gel (EtOAc) to yield the product **178** as a yellowish oil (120.3 mg, 94% yield, 14:1 d.r.). The diastereomeric ratio was determined by crude  $^1\text{H}$  NMR spectroscopy.

According to **General Procedure B** with 3-ethyl 5-methyl (4*S*)-4-(2-chlorophenyl)-2-((2-(2-chloropropanamido)ethoxy)methyl)-6-methyl-1,4-dihydropyridine-3,5-dicarboxylate **E5** (99.6 mg, 0.20 mmol, 1.0 equiv.), memantine hydrochloride **A104** (43.0 mg, 0.20 mmol, 1.0 equiv.), **L\*4** (15.4 mg, 0.03 mmol, 15 mol%),  $\text{Cs}_2\text{CO}_3$  (260.6 mg, 0.80 mmol, 4.0 equiv.), anhydrous NMP (2.8 mL), and EtOAc (1.2 mL) for 96 h, the reaction mixture was purified by preparative thin-layer chromatography on silica gel (EtOAc) to yield the product **178** as a yellowish oil (99.8 mg, 78% yield, 10:1 d.r.). The diastereomeric ratio was determined by crude  $^1\text{H}$  NMR spectroscopy.

$^1\text{H}$  NMR (400 MHz,  $\text{CDCl}_3$ )  $\delta$  8.11 – 8.08 (m, 1H), 7.43 – 7.36 (m, 2H), 7.23 – 7.21 (m, 1H), 7.14 – 7.09 (m, 1H), 7.05 – 7.00 (m, 1H), 5.41 (s, 1H), 4.78 – 4.63 (m, 2H), 4.09 – 3.98 (m, 2H), 3.69 – 3.36 (m, 9H), 2.42 (s, 0.20H), 2.40 (s, 2.80H), 2.14 – 2.09 (m, 1H), 1.50 – 1.46 (m, 1H), 1.37 – 1.24 (m, 10H), 1.19 – 1.04 (m, 7H), 0.82 (s, 6H).

$^{13}\text{C}$  NMR (100 MHz,  $\text{CDCl}_3$ )  $\delta$  177.3, 167.9, 167.0, 145.8, 145.0, 144.2, 132.2, 131.4, 129.0, 127.2, 126.7, 103.6, 101.2, 70.6, 67.9, 59.6, 53.1, 50.6, 50.2, 49.2, 49.0, 42.6, 41.3, 38.4, 37.0, 32.23, 32.21, 30.1, 30.0, 21.7, 19.4, 14.2.

HRMS (ESI)  $m/z$  calcd. for  $\text{C}_{35}\text{H}_{49}\text{ClN}_3\text{O}_6$   $[\text{M} + \text{H}]^+$  642.3304, found 1642.3308.

**3-Ethyl 5-methyl (S)-2-(((S)-2-(((R)-1-(7-(but-2-yn-1-yl)-3-methyl-1-((4-methylquinazolin-2-yl)methyl)-2,6-dioxo-2,3,6,7-tetrahydro-1H-purin-8-yl)piperidin-3-yl)amino)propanamido)ethoxy)methyl)-4-(2-chlorophenyl)-6-methyl-1,4-dihydropyridine-3,5-dicarboxylate (179)**

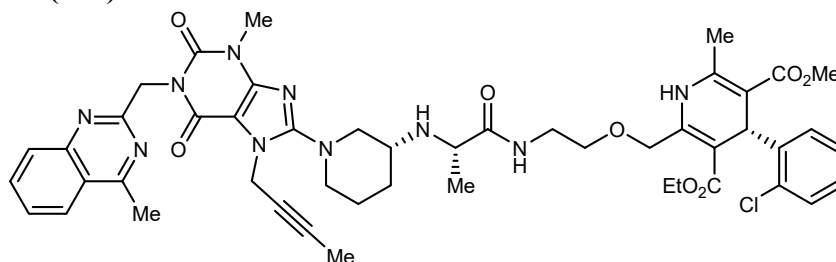

**179**

According to **General Procedure B** with 3-ethyl 5-methyl (4*S*)-4-(2-chlorophenyl)-2-((2-(2-chloropropanamido)ethoxy)methyl)-6-methyl-1,4-dihydropyridine-3,5-dicarboxylate **E5** (149.4 mg, 0.30 mmol, 1.5 equiv.), linagliptin **A102** (94.4 mg, 0.20 mmol, 1.0 equiv.), and **L\*4** (15.4 mg, 0.03 mmol, 15 mol%), the reaction mixture was purified by preparative thin-layer chromatography on silica gel ( $\text{CH}_2\text{Cl}_2/\text{CH}_3\text{OH} = 25/1$ ) to yield the product **179** as a colorless oil (179.3 mg, 96% yield, 13:1 d.r.). The diastereomeric ratio was determined by crude  $^1\text{H}$  NMR spectroscopy.

According to **General Procedure B** with 3-ethyl 5-methyl (4*S*)-4-(2-chlorophenyl)-2-((2-(2-chloropropanamido)ethoxy)methyl)-6-methyl-1,4-dihydropyridine-3,5-dicarboxylate **E5** (99.6 mg, 0.20 mmol, 1.0 equiv.), linagliptin **A102** (94.4 mg, 0.20 mmol, 1.0 equiv.), and **L\*4** (15.4 mg, 0.03 mmol, 15 mol%), the reaction mixture was purified by preparative thin-layer chromatography on silica gel ( $\text{CH}_2\text{Cl}_2/\text{CH}_3\text{OH} = 25/1$ ) to yield the product **179** as a colorless oil (124.3 mg, 67% yield, 13:1 d.r.). The diastereomeric ratio was determined by crude  $^1\text{H}$  NMR

spectroscopy.

**<sup>1</sup>H NMR** (400 MHz, CDCl<sub>3</sub>) δ 8.01 – 7.98 (m, 1H), 7.86 – 7.83 (m, 1H), 7.76 – 7.65 (m, 2H), 7.52 – 7.48 (m, 1H), 7.40 – 7.35 (m, 2H), 7.23 – 7.20 (m, 1H), 7.13 – 7.08 (m, 1H), 7.04 – 7.00 (m, 1H), 5.57 (s, 2H), 5.39 (s, 0.07H), 5.38 (s, 0.93H), 4.89 – 4.84 (m, 2H), 4.77 – 4.62 (m, 2H), 4.07 – 3.99 (m, 2H), 3.71 – 3.53 (m, 11H), 3.45 – 3.36 (m, 2H), 3.15 – 3.08 (m, 1H), 2.98 – 2.93 (m, 1H), 2.89 – 2.83 (m, 4H), 2.37 (s, 3H), 2.03 – 1.69 (m, 7H), 1.49 – 1.41 (m, 1H), 1.38 – 1.32 (m, 3H), 1.16 (t, *J* = 7.1 Hz, 3H).

**<sup>13</sup>C NMR** (100 MHz, CDCl<sub>3</sub>) δ 175.6, 168.3, 167.8, 166.8, 160.8, 155.7, 154.1, 151.6, 149.6, 147.6, 145.6, 144.8, 144.2, 133.0, 132.0, 131.2, 129.0, 128.5, 127.1, 126.6, 126.5, 124.6, 122.8, 104.3, 103.4, 101.2, 81.2, 73.0, 70.5, 67.8, 59.5, 56.0, 55.7, 52.7, 50.51, 50.46, 46.0, 38.5, 36.9, 35.4, 30.2, 29.5, 23.0, 21.5, 20.0, 19.1, 14.0, 3.4.

**HRMS** (ESI) *m/z* calcd. for C<sub>48</sub>H<sub>56</sub>ClN<sub>10</sub>O<sub>8</sub> [*M* + *H*]<sup>+</sup> 935.3966, found 935.3967.

## Synthesis of chiral unnatural α-amino carboxamide via late-stage C(sp<sup>3</sup>)-H functionalization of bioactive carboxylic acid molecules.

### The synthesis of 180-181

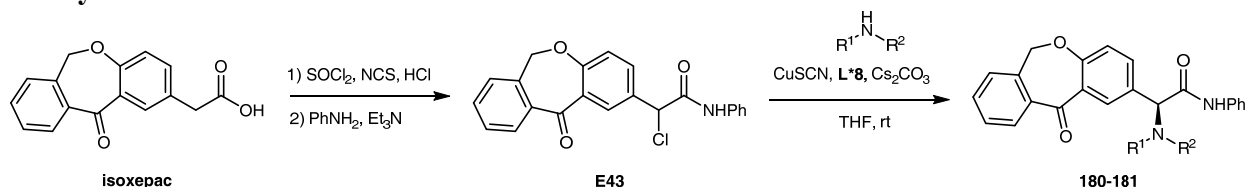

### 2-Chloro-2-(11-oxo-6,11-dihydrodibenzo[*b,e*]oxepin-2-yl)-*N*-phenylacetamide (E43)

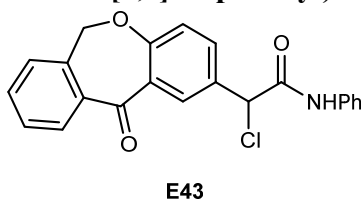

According to **General procedure 4** with isoxepac (6.70 g, 25.0 mmol, 1.0 equiv.) and aniline (2.33 g, 25.0 mmol, 1.0 equiv.), the reaction mixture was purified by column chromatography on silica gel (petroleum ether/EtOAc = 5/1) to yield the product **E43** as a white solid (2.42 g, 26% overall yield).

**<sup>1</sup>H NMR** (400 MHz, CDCl<sub>3</sub>) δ 8.59 (s, 1H), 8.35 (d, *J* = 2.5 Hz, 1H), 7.87 – 7.85 (m, 1H), 7.64 (dd, *J* = 8.6, 2.5 Hz, 1H), 7.57 – 7.53 (m, 3H), 7.48 – 7.44 (m, 1H), 7.36 – 7.30 (m, 3H), 7.16 – 7.12 (m, 1H), 7.07 (d, *J* = 8.6 Hz, 1H), 5.54 (s, 1H), 5.17 (s, 2H).

**<sup>13</sup>C NMR** (100 MHz, CDCl<sub>3</sub>) δ 190.4, 165.2, 161.8, 140.2, 136.8, 135.2, 134.5, 132.9, 131.8, 130.5, 129.5, 129.4, 129.0, 127.9, 125.2, 125.0, 121.9, 120.2, 73.5, 61.0.

**HRMS** (ESI) *m/z* calcd. for C<sub>22</sub>H<sub>17</sub>ClNO<sub>3</sub> [*M* + *H*]<sup>+</sup> 378.0891, found 378.0891.

### (*S*)-2-(Benzylamino)-2-(11-oxo-6,11-dihydrodibenzo[*b,e*]oxepin-2-yl)-*N*-phenylacetamide (180)

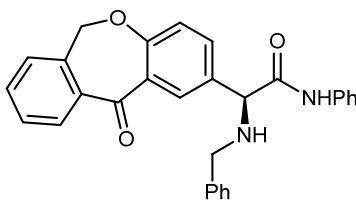

**180**

According to **General Procedure F** with 2-chloro-2-(11-oxo-6,11-dihydrodibenzo[*b,e*]oxepin-2-yl)-*N*-phenylacetamide **E43** (113.1 mg, 0.30 mmol, 1.5 equiv.) and benzylamine **A1** (21.4 mg, 0.20 mmol, 1.0 equiv.) for 72 h, the reaction mixture was purified by flash column chromatography on silica gel (petroleum ether/EtOAc = 2/1) to yield the product **180** as a yellowish solid (40.0 mg, 45% yield, 90% e.e.).

**HPLC** analysis: Chiralcel OD3 (*n*-hexane/*i*-PrOH = 80/20, flow rate 0.8 mL/min,  $\lambda$  = 254 nm),  $t_R$  (major) = 21.37 min,  $t_R$  (minor) = 30.19 min.

**<sup>1</sup>H NMR** (400 MHz, CDCl<sub>3</sub>)  $\delta$  9.40 (s, 1H), 8.28 (d,  $J$  = 2.4 Hz, 1H), 7.85 (dd,  $J$  = 7.7, 1.4 Hz, 1H), 7.58 – 7.55 (m, 2H), 7.54 – 7.50 (m, 2H), 7.45 – 7.41 (m, 1H), 7.37 – 7.26 (m, 8H), 7.10 – 7.06 (m, 1H), 7.01 (d,  $J$  = 8.5 Hz, 1H), 5.13 (s, 2H), 4.37 (s, 1H), 3.86 (s, 2H), 2.31 (s, 1H).

**<sup>13</sup>C NMR** (100 MHz, CDCl<sub>3</sub>)  $\delta$  190.6, 169.8, 161.1, 140.2, 138.7, 137.5, 135.3, 134.3, 132.8, 132.6, 130.2, 129.4, 129.2, 128.9, 128.7, 128.1, 127.8, 127.5, 125.2, 124.2, 121.4, 119.5, 73.5, 66.6, 52.6.

**HRMS** (ESI)  $m/z$  calcd. for C<sub>29</sub>H<sub>25</sub>N<sub>2</sub>O<sub>3</sub> [M + H]<sup>+</sup> 449.1860, found 449.1861.

**(S)-2-Morpholino-2-(11-oxo-6,11-dihydrodibenzo[*b,e*]oxepin-2-yl)-*N*-phenylacetamide (181)**

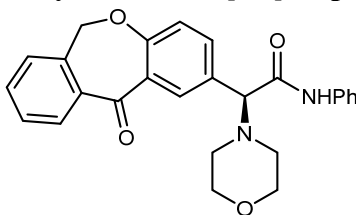

**181**

According to **General Procedure F** with 2-chloro-2-(11-oxo-6,11-dihydrodibenzo[*b,e*]oxepin-2-yl)-*N*-phenylacetamide **E43** (113.1 mg, 0.30 mmol, 1.5 equiv.) and morpholine **A89** (17.4 mg, 0.20 mmol, 1.0 equiv.) for 72 h, the reaction mixture was purified by flash column chromatography on silica gel (petroleum ether/EtOAc = 2/1) to yield the product **181** as a colorless oil (70.7 mg, 83% yield, 88% e.e.).

**HPLC** analysis: Chiralcel IA (*n*-hexane/*i*-PrOH = 80/20, flow rate 1.0 mL/min,  $\lambda$  = 254 nm),  $t_R$  (minor) = 14.50 min,  $t_R$  (major) = 25.18 min.

According to **General Procedure F** with 2-chloro-2-(11-oxo-6,11-dihydrodibenzo[*b,e*]oxepin-2-yl)-*N*-phenylacetamide **E43** (75.4 mg, 0.20 mmol, 1.0 equiv.) and morpholine **A89** (17.4 mg, 0.20 mmol, 1.0 equiv.) for 72 h, the reaction mixture was purified by flash column chromatography on silica gel (petroleum ether/EtOAc = 2/1) to yield the product **181** as a colorless oil (53.2 mg, 62% yield, 89% e.e.).

**<sup>1</sup>H NMR** (400 MHz, CDCl<sub>3</sub>)  $\delta$  9.15 (s, 1H), 8.23 (d,  $J$  = 2.4 Hz, 1H), 7.87 (dd,  $J$  = 7.7, 1.4 Hz, 1H), 7.59 – 7.43 (m, 5H), 7.35 – 7.30 (m, 3H), 7.12 – 7.08 (m, 1H), 7.04 (d,  $J$  = 8.5 Hz, 1H), 5.16 (s, 2H), 4.06 (s, 1H), 3.78 – 3.75 (m, 4H), 2.53 – 2.51 (m, 4H).

**<sup>13</sup>C NMR** (100 MHz, CDCl<sub>3</sub>)  $\delta$  190.6, 168.7, 161.3, 140.2, 137.4, 135.5, 135.3, 132.8, 132.5,



129.4, 129.2, 129.0, 128.2, 127.8, 125.1, 124.4, 121.3, 119.6, 75.4, 73.5, 66.9, 51.8.

**HRMS** (ESI)  $m/z$  calcd. for  $C_{26}H_{25}N_2O_4$   $[M + H]^+$  429.1809, found 429.1809.

### The synthesis of 182-184

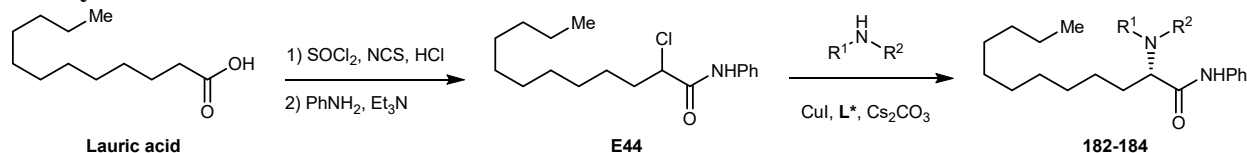

### 2-Chloro-*N*-phenyldodecanamide (**E44**)

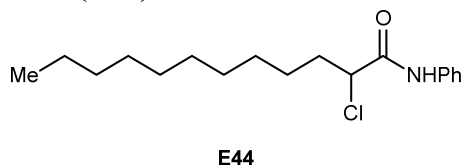

According to **General procedure 4** with lauric acid (5.00 g, 25.0 mmol, 1.0 equiv.) and aniline (2.33 g, 25.0 mmol, 1.0 equiv.), the reaction mixture was purified by column chromatography on silica gel (petroleum ether/EtOAc = 20/1) to yield the product **E44** as a white solid (5.40 g, 70% overall yield).

**$^1H$  NMR** (400 MHz,  $CDCl_3$ )  $\delta$  8.32 (s, 1H), 7.56 – 7.53 (m, 2H), 7.37 – 7.31 (m, 2H), 7.17 – 7.13 (m, 1H), 4.45 (dd,  $J$  = 8.3, 4.4 Hz, 1H), 2.22 – 2.13 (m, 1H), 2.05 – 1.96 (m, 1H), 1.58 – 1.45 (m, 2H), 1.37 – 1.26 (m, 14H), 0.88 (t,  $J$  = 6.8 Hz, 3H).

**$^{13}C$  NMR** (100 MHz,  $CDCl_3$ )  $\delta$  167.1, 136.9, 129.0, 125.0, 120.0, 61.6, 35.6, 31.8, 29.51, 29.47, 29.32, 29.26, 28.8, 25.9, 22.6, 14.1.

**HRMS** (ESI)  $m/z$  calcd. for  $C_{18}H_{29}ClNO$   $[M + H]^+$  310.1932, found 310.1930.

### (*S*)-2-(Benzylamino)-*N*-phenyldodecanamide (**182**)

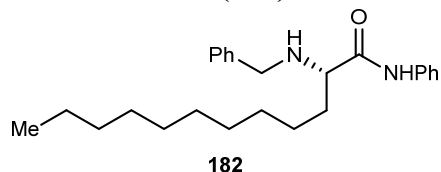

According to **General Procedure H** with 2-chloro-*N*-phenyldodecanamide **E44** (123.7 mg, 0.40 mmol, 2.0 equiv.) and benzylamine **A1** (21.4 mg, 0.20 mmol, 1.0 equiv.) for 72 h, the reaction mixture was purified by flash column chromatography on silica gel (petroleum ether/EtOAc = 5/1) to yield the product **182** as a colorless oil (67.4 mg, 89% yield, 86% e.e.).

**HPLC** analysis: Chiralcel IC (*n*-hexane/*i*-PrOH = 95/5, flow rate 0.8 mL/min,  $\lambda$  = 254 nm),  $t_R$  (major) = 13.54 min,  $t_R$  (minor) = 19.85 min.

**$^1H$  NMR** (400 MHz,  $CDCl_3$ )  $\delta$  9.39 (s, 1H), 7.60 – 7.57 (m, 2H), 7.38 – 7.27 (m, 7H), 7.12 – 7.08 (m, 1H), 3.85 – 3.74 (m, 2H), 3.26 (dd,  $J$  = 7.9, 4.7 Hz, 1H), 1.87 – 1.79 (m, 2H), 1.68 – 1.59 (m, 1H), 1.40 – 1.34 (m, 2H), 1.31 – 1.24 (m, 14H), 0.87 (t,  $J$  = 6.9 Hz, 3H).

**$^{13}C$  NMR** (100 MHz,  $CDCl_3$ )  $\delta$  172.5, 139.1, 137.8, 129.0, 128.7, 128.1, 127.5, 124.0, 119.3, 63.2, 53.1, 33.7, 31.9, 29.52, 29.51, 29.40, 29.39, 29.3, 25.9, 22.6, 14.1.

**HRMS** (ESI)  $m/z$  calcd. for  $C_{25}H_{37}N_2O$   $[M + H]^+$  381.2900, found 381.2897.

### (*S*)-2-(Diethylamino)-*N*-phenyldodecanamide (**183**)

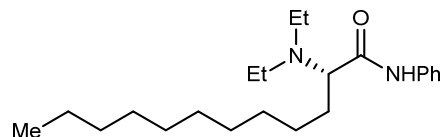

**183**

According to **General Procedure E** with 2-chloro-*N*-phenyldodecanamide **E44** (92.8 mg, 0.30 mmol, 1.5 equiv.) and diethylamine **A51** (14.6 mg, 0.20 mmol, 1.0 equiv.) for 96 h, the reaction mixture was purified by flash column chromatography on silica gel (petroleum ether/EtOAc = 10/1) to yield the product **183** as a colorless oil (50.7 mg, 73% yield, 95% e.e.).

**HPLC** analysis: Chiralcel IA (*n*-hexane/*i*-PrOH = 90/10, flow rate 1.0 mL/min,  $\lambda$  = 254 nm),  $t_R$  (major) = 4.42 min,  $t_R$  (minor) = 5.33 min.

According to **General Procedure E** with 2-chloro-*N*-phenyldodecanamide **E44** (61.8 mg, 0.20 mmol, 1.0 equiv.) and diethylamine **A51** (14.6 mg, 0.20 mmol, 1.0 equiv.) for 96 h, the reaction mixture was purified by flash column chromatography on silica gel (petroleum ether/EtOAc = 10/1) to yield the product **183** as a colorless oil (47.9 mg, 69% yield, 94% e.e.).

**<sup>1</sup>H NMR** (400 MHz, CDCl<sub>3</sub>)  $\delta$  9.55 (s, 1H), 7.58 – 7.55 (m, 2H), 7.34 – 7.29 (m, 2H), 7.10 – 7.06 (m, 1H), 3.31 – 3.28 (m, 1H), 2.74 – 2.66 (m, 2H), 2.63 – 2.54 (m, 2H), 1.91 – 1.82 (m, 1H), 1.66 – 1.55 (m, 2H), 1.43 – 1.26 (m, 15H), 1.11 (t,  $J$  = 7.1 Hz, 6H), 0.88 (t,  $J$  = 6.8 Hz, 3H).

**<sup>13</sup>C NMR** (100 MHz, CDCl<sub>3</sub>)  $\delta$  172.7, 138.0, 128.9, 123.7, 119.1, 64.9, 44.4, 31.9, 29.9, 29.61, 29.58, 29.5, 29.3, 28.3, 26.2, 22.6, 14.1, 13.4.

**HRMS** (ESI)  $m/z$  calcd. for C<sub>22</sub>H<sub>39</sub>N<sub>2</sub>O [M + H]<sup>+</sup> 347.3057, found 347.3053.

#### (*S*)-2-Morpholino-*N*-phenyldodecanamide (**184**)

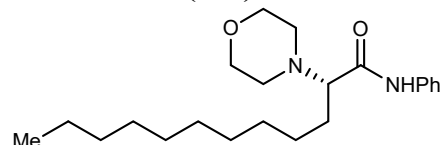

**184**

According to **General Procedure H** with 2-chloro-*N*-phenyldodecanamide **E44** (92.8 mg, 0.30 mmol, 1.5 equiv.) and morpholine **A89** (17.4 mg, 0.20 mmol, 1.0 equiv.) for 72 h, the reaction mixture was purified by flash column chromatography on silica gel (petroleum ether/EtOAc = 3/1) to yield the product **184** as a white solid (71.4 mg, 99% yield, 92% e.e.).

**HPLC** analysis: Chiralcel OD3 (*n*-hexane/*i*-PrOH = 98/2, flow rate 0.8 mL/min,  $\lambda$  = 254 nm),  $t_R$  (minor) = 22.17 min,  $t_R$  (major) = 23.73 min.

According to **General Procedure H** with 2-chloro-*N*-phenyldodecanamide **E44** (61.8 mg, 0.20 mmol, 1.0 equiv.) and morpholine **A89** (17.4 mg, 0.20 mmol, 1.0 equiv.) for 72 h, the reaction mixture was purified by flash column chromatography on silica gel (petroleum ether/EtOAc = 3/1) to yield the product **184** as a white solid (64.1 mg, 89% yield, 92% e.e.).

**<sup>1</sup>H NMR** (400 MHz, CDCl<sub>3</sub>)  $\delta$  8.95 (s, 1H), 7.57 – 7.55 (m, 2H), 7.35 – 7.31 (m, 2H), 7.12 – 7.08 (m, 1H), 3.80 – 3.71 (m, 4H), 2.95 (dd,  $J$  = 7.1, 5.5 Hz, 1H), 2.68 – 2.63 (m, 2H), 2.60 – 2.55 (m, 2H), 1.81 – 1.67 (m, 2H), 1.51 – 1.37 (m, 2H), 1.34 – 1.25 (m, 14H), 0.87 (t,  $J$  = 6.8 Hz, 3H).

**<sup>13</sup>C NMR** (100 MHz, CDCl<sub>3</sub>)  $\delta$  171.1, 137.6, 129.0, 124.0, 119.3, 70.2, 67.2, 50.8, 31.8, 29.8, 29.51, 29.48, 29.4, 29.2, 28.0, 26.5, 22.6, 14.0.

**HRMS** (ESI)  $m/z$  calcd. for C<sub>22</sub>H<sub>37</sub>N<sub>2</sub>O<sub>2</sub> [M + H]<sup>+</sup> 361.2850, found 361.2848.

## The synthesis of 185-187

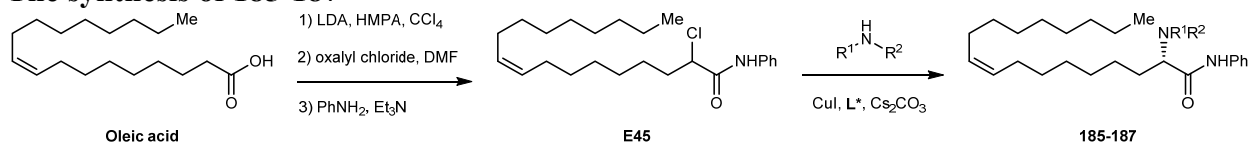

### (Z)-2-Chloro-*N*-phenyloctadec-9-enamide (E45)

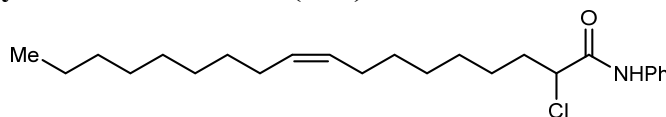

E45

According to **General procedure 6** with oleic acid (5.65 g, 20.0 mmol, 1.0 equiv.) and aniline (1.86 g, 20.0 mmol, 1.0 equiv.), the reaction mixture was purified by column chromatography on silica gel (petroleum ether/EtOAc = 20/1) to yield the product **E45** as a yellowish oil (3.67 g, 47% overall yield).

**<sup>1</sup>H NMR** (400 MHz, CDCl<sub>3</sub>) δ 8.32 (s, 1H), 7.56 – 7.53 (m, 2H), 7.36 – 7.31 (m, 2H), 7.17 – 7.12 (m, 1H), 5.44 – 5.24 (m, 2H), 4.45 (dd, *J* = 8.3, 4.4 Hz, 1H), 2.22 – 2.14 (m, 1H), 2.10 – 1.94 (m, 5H), 1.58 – 1.46 (m, 2H), 1.36 – 1.25 (m, 18H), 0.88 (t, *J* = 6.8 Hz, 3H).

**<sup>13</sup>C NMR** (100 MHz, CDCl<sub>3</sub>) δ 167.0, 136.9, 130.0, 129.6, 129.0, 125.0, 120.0, 61.6, 35.6, 31.9, 29.7, 29.6, 29.5, 29.31, 29.27, 28.9, 28.7, 27.2, 27.1, 25.9, 22.6, 14.1.

**HRMS** (ESI) *m/z* calcd. for C<sub>24</sub>H<sub>39</sub>ClNO [*M* + *H*]<sup>+</sup> 392.2715, found 392.2712.

### (*S,Z*)-2-(Benzylamino)-*N*-phenyloctadec-9-enamide (185)

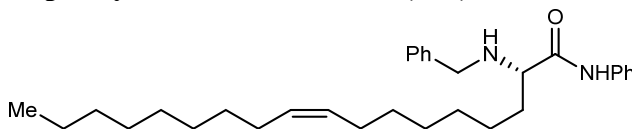

185

According to **General Procedure H** with (*Z*)-2-chloro-*N*-phenyloctadec-9-enamide **E45** (156.5 mg, 0.40 mmol, 2.0 equiv.) and benzylamine **A1** (21.4 mg, 0.20 mmol, 1.0 equiv.) for 72 h, the reaction mixture was purified by flash column chromatography on silica gel (petroleum ether/EtOAc = 5/1) to yield the product **185** as a colorless oil (68.6 mg, 74% yield, 90% e.e.).

**HPLC** analysis: Chiralcel IC (*n*-hexane/*i*-PrOH = 90/10, flow rate 1.0 mL/min, λ = 254 nm), *t<sub>R</sub>* (major) = 6.29 min, *t<sub>R</sub>* (minor) = 7.94 min.

**<sup>1</sup>H NMR** (400 MHz, CDCl<sub>3</sub>) δ 9.39 (s, 1H), 7.59 – 7.57 (m, 2H), 7.38 – 7.27 (m, 7H), 7.12 – 7.08 (m, 1H), 5.38 – 5.28 (m, 2H), 3.85 – 3.74 (m, 2H), 3.29 – 3.25 (m, 1H), 2.33 (s, 1H), 2.03 – 1.97 (m, 4H), 1.88 – 1.79 (m, 1H), 1.69 – 1.59 (m, 1H), 1.42 – 1.23 (m, 20H), 0.88 (t, *J* = 6.7 Hz, 3H).

**<sup>13</sup>C NMR** (100 MHz, CDCl<sub>3</sub>) δ 172.4, 139.1, 137.8, 130.0, 129.6, 129.0, 128.7, 128.1, 127.5, 124.0, 119.3, 63.1, 53.1, 33.7, 31.9, 29.7, 29.6, 29.5, 29.32, 29.29, 29.0, 27.2, 27.1, 25.9, 22.7, 14.1.

**HRMS** (ESI) *m/z* calcd. for C<sub>31</sub>H<sub>47</sub>N<sub>2</sub>O [*M* + *H*]<sup>+</sup> 463.3683, found 463.3679.

### (*S,Z*)-2-(Diethylamino)-*N*-phenyloctadec-9-enamide (186)

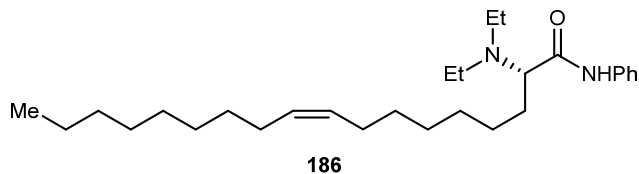

According to **General Procedure E** with (Z)-2-chloro-N-phenyloctadec-9-enamide **E45** (117.4 mg, 0.30 mmol, 1.5 equiv.) and diethylamine **A51** (14.6 mg, 0.20 mmol, 1.0 equiv.) for 96 h, the reaction mixture was purified by flash column chromatography on silica gel (petroleum ether/EtOAc = 10/1) to yield the product **186** as a colorless oil (80.0 mg, 93% yield, 95% e.e.).

**HPLC** analysis: Chiralcel IA (*n*-hexane/*i*-PrOH = 95/5, flow rate 0.8 mL/min,  $\lambda$  = 254 nm),  $t_R$  (major) = 5.70 min,  $t_R$  (minor) = 6.89 min.

According to **General Procedure E** with (Z)-2-chloro-N-phenyloctadec-9-enamide **E45** (78.3 mg, 0.20 mmol, 1.0 equiv.) and diethylamine **A51** (14.6 mg, 0.20 mmol, 1.0 equiv.) for 96 h, the reaction mixture was purified by flash column chromatography on silica gel (petroleum ether/EtOAc = 10/1) to yield the product **186** as a colorless oil (70.1 mg, 82% yield, 95% e.e.).

**<sup>1</sup>H NMR** (400 MHz, CDCl<sub>3</sub>)  $\delta$  9.53 (s, 1H), 7.58 – 7.56 (m, 2H), 7.34 – 7.29 (m, 2H), 7.10 – 7.05 (m, 1H), 5.39 – 5.30 (m, 2H), 3.30 – 3.27 (m, 1H), 2.74 – 2.65 (m, 2H), 2.62 – 2.54 (m, 2H), 2.03 – 1.98 (m, 3H), 1.91 – 1.84 (m, 1H), 1.66 – 1.55 (m, 2H), 1.41 – 1.25 (m, 20H), 1.11 (t,  $J$  = 7.2 Hz, 6H), 0.88 (t,  $J$  = 6.8 Hz, 3H).

**<sup>13</sup>C NMR** (100 MHz, CDCl<sub>3</sub>)  $\delta$  172.7, 138.0, 129.9, 129.7, 128.9, 123.7, 119.0, 64.9, 44.4, 31.9, 29.8, 29.73, 29.71, 29.6, 29.5, 29.3, 29.1, 28.3, 27.18, 27.15, 26.2, 22.6, 14.1, 13.4.

**HRMS** (ESI)  $m/z$  calcd. for C<sub>28</sub>H<sub>49</sub>N<sub>2</sub>O [M + H]<sup>+</sup> 429.3839, found 429.3837.

#### (S,Z)-2-Morpholino-N-phenyloctadec-9-enamide (**187**)

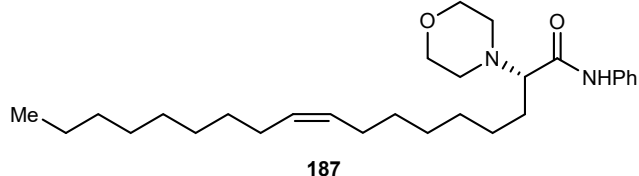

According to **General Procedure H** with (Z)-2-chloro-N-phenyloctadec-9-enamide **E45** (117.4 mg, 0.30 mmol, 1.5 equiv.) and morpholine **A89** (17.4 mg, 0.20 mmol, 1.0 equiv.) for 72 h, the reaction mixture was purified by flash column chromatography on silica gel (petroleum ether/EtOAc = 3/1) to yield the product **187** as a colorless oil (80.2 mg, 91% yield, 91% e.e.).

**HPLC** analysis: Chiralcel OD3 (*n*-hexane/*i*-PrOH = 98/2, flow rate 0.8 mL/min,  $\lambda$  = 254 nm),  $t_R$  (minor) = 19.52 min,  $t_R$  (major) = 21.22 min.

According to **General Procedure H** with (Z)-2-chloro-N-phenyloctadec-9-enamide **E45** (78.3 mg, 0.20 mmol, 1.0 equiv.) and morpholine **A89** (17.4 mg, 0.20 mmol, 1.0 equiv.) for 72 h, the reaction mixture was purified by flash column chromatography on silica gel (petroleum ether/EtOAc = 3/1) to yield the product **187** as a colorless oil (68.4 mg, 77% yield, 91% e.e.).

**<sup>1</sup>H NMR** (400 MHz, CDCl<sub>3</sub>)  $\delta$  8.94 (s, 1H), 7.56 – 7.54 (m, 2H), 7.35 – 7.31 (m, 2H), 7.12 – 7.08 (m, 1H), 5.41 – 5.25 (m, 2H), 3.80 – 3.71 (m, 4H), 2.97 – 2.93 (m, 1H), 2.68 – 2.63 (m, 2H), 2.60 – 2.55 (m, 2H), 2.06 – 1.94 (m, 4H), 1.81 – 1.68 (m, 2H), 1.50 – 1.24 (m, 20H), 0.88 (t,  $J$  = 6.8 Hz, 3H).

**<sup>13</sup>C NMR** (100 MHz, CDCl<sub>3</sub>)  $\delta$  171.0, 137.6, 129.9, 129.6, 129.0, 124.0, 119.3, 70.1, 67.2, 50.8, 31.8, 29.7, 29.62, 29.56, 29.4, 29.3, 29.2, 29.0, 28.0, 27.1, 27.0, 26.5, 22.6, 14.0.

**HRMS** (ESI)  $m/z$  calcd. for C<sub>28</sub>H<sub>47</sub>N<sub>2</sub>O<sub>2</sub> [M + H]<sup>+</sup> 443.3632, found 443.3632.

## The synthesis of vicinal diamine **188**

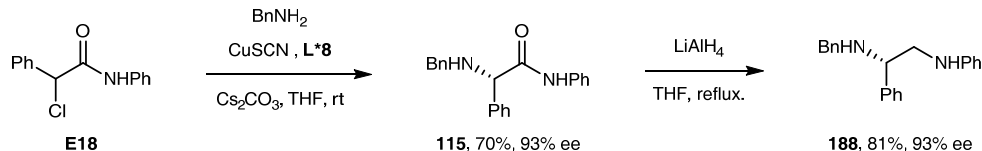

According to **General Procedure F** with 2-chloro-*N*,2-diphenylacetamide **E18** (367.6 mg, 1.5 mmol, 1.5 equiv.) and benzylamine **A1** (107.1 mg, 1.0 mmol, 1.0 equiv.) for 72 h, the reaction mixture was purified by column chromatography on silica gel (petroleum ether/EtOAc = 3/1) to yield the product **115** as a white solid (222.0 mg, 70% yield, 93% e.e.).

To a solution of **115** (63.2 mg, 0.20 mmol, 1.0 equiv.) in anhydrous THF (4.0 mL) was added LiAlH<sub>4</sub> (0.32 mL, 0.80 mmol, 4.0 equiv., 2.5 M in THF) dropwise at 0 °C. Then the reaction mixture was heated at reflux for 12 h. After completion (monitored by TLC), the reaction was quenched by saturated NH<sub>4</sub>Cl solution (10 mL) and extracted with CH<sub>2</sub>Cl<sub>2</sub> three times. The combined organic phase was washed with brine, dried over Na<sub>2</sub>SO<sub>4</sub>, filtrated and concentrated to afford the crude product, which was purified by flash column chromatography on silica gel (petroleum ether/EtOAc = 3/1) to yield the product **188** as a yellowish oil (49.0 mg, 81% yield, 93% e.e.).

## (*S*)-*N*<sup>1</sup>-Benzyl-*N*<sup>2</sup>,1-diphenylethane-1,2-diamine (**188**)

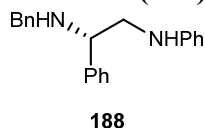

**HPLC** analysis: Chiralcel AD3 (*n*-hexane/*i*-PrOH = 95/5, flow rate 1.0 mL/min, λ = 254 nm), *t*<sub>R</sub> (major) = 9.01 min, *t*<sub>R</sub> (minor) = 10.35 min.

**<sup>1</sup>H NMR** (400 MHz, CDCl<sub>3</sub>) δ 7.41 – 7.36 (m, 4H), 7.33 – 7.21 (m, 6H), 7.18 – 7.13 (m, 2H), 6.72 – 6.68 (m, 1H), 6.62 – 6.59 (m, 2H), 3.94 – 3.91 (m, 1H), 3.73 (d, *J* = 13.2 Hz, 1H), 3.57 (d, *J* = 13.1 Hz, 1H), 3.34 – 3.24 (m, 2H), 2.19 (s, 1H).

**<sup>13</sup>C NMR** (100 MHz, CDCl<sub>3</sub>) δ 148.0, 141.7, 140.1, 129.2, 128.7, 128.4, 128.1, 127.6, 127.2, 127.0, 117.6, 113.1, 61.3, 51.2, 50.6.

**HRMS** (ESI) *m/z* calcd. for C<sub>21</sub>H<sub>23</sub>N<sub>2</sub> [M + H]<sup>+</sup> 303.1856, found 303.1851.

## The synthesis of γ-secretase inhibitor

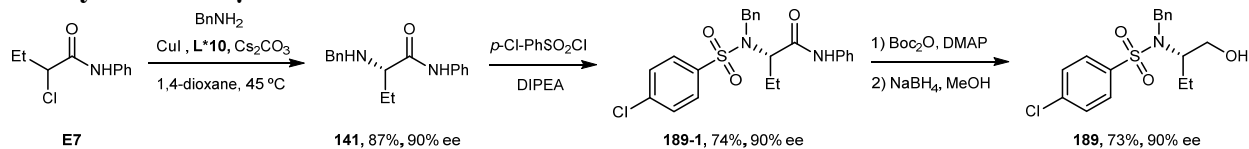

According to **General Procedure H** with 2-chloro-*N*-phenylbutanamide **E7** (394.1 mg, 2.0 mmol, 2.0 equiv.) and benzylamine **A1** (107.1 mg, 1.0 mmol, 1.0 equiv.) for 72 h, the reaction mixture was purified by column chromatography on silica gel (petroleum ether/EtOAc = 2/1) to yield the product **141** as a colorless oil (234.5 mg, 87% yield, 90% e.e.).

To a solution of **141** (26.8 mg, 0.1 mmol, 1.0 equiv.) and 4-chlorobenzenesulfonyl chloride (84.0 mg, 0.4 mmol, 4.0 equiv.) in CH<sub>3</sub>CN (2.0 mL) was added DIPEA (25.8 mg, 0.2 mmol, 2.0 equiv.) at 0 °C. Then the reaction mixture was warmed up to room temperature and stirred for 48 h. After completion (monitored by TLC), the reaction was quenched with HCl aqueous solution

(1.0 M, 5 mL) and extracted with EtOAc three times. The combined organic phase was washed with brine, dried over Na<sub>2</sub>SO<sub>4</sub>, filtrated and concentrated to afford the crude product, which was purified by flash column chromatography on silica gel (petroleum ether/EtOAc = 5/1) to yield the product **189-1** as a white solid (32.9 mg, 74% yield, 90% e.e.).

To a solution of **189-1** (32.9 mg, 0.0744 mmol, 1.0 equiv.) in CH<sub>3</sub>CN (2.0 mL) was added Boc<sub>2</sub>O (81.1 mg, 0.372 mmol, 5.0 equiv.) and DMAP (19.2 mg, 0.1488 mmol, 2.0 equiv.) at 0 °C. Then the reaction mixture was warmed up to room temperature and stirred for 1 h. After completion (monitored by TLC), the reaction was quenched with HCl aqueous solution (1.0 M, 5 mL) and extracted with EtOAc three times. The combined organic phase was washed with brine, dried over Na<sub>2</sub>SO<sub>4</sub>, filtrated and concentrated to afford the crude product, which was used in the next step without further purification.

To a solution of the above crude product in CH<sub>3</sub>OH (2.0 mL) was added NaBH<sub>4</sub> (11.3 mg, 0.2976 mmol, 4.0 equiv.) slowly at 0 °C. Then the reaction mixture was warmed up to room temperature and stirred for 1 h. After completion (monitored by TLC), the reaction was quenched by saturated NH<sub>4</sub>Cl solution (10 mL) and extracted with CH<sub>2</sub>Cl<sub>2</sub> three times. The combined organic phase was washed with brine, dried over Na<sub>2</sub>SO<sub>4</sub>, filtrated and concentrated to afford the crude product, which was purified by flash column chromatography on silica gel (petroleum ether/EtOAc = 3/1) to yield the product **189** as a yellowish oil (19.3 mg, 73% yield, 90% e.e.).

**(S)-2-((N-Benzyl-4-chlorophenyl)sulfonamido)-N-phenylbutanamide (189-1)**

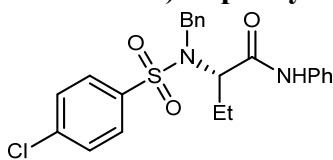

**189-1**

**HPLC** analysis: Chiralcel IA (*n*-hexane/*i*-PrOH = 90/10, flow rate 1.0 mL/min,  $\lambda$  = 254 nm), *t*<sub>R</sub> (minor) = 11.56 min, *t*<sub>R</sub> (major) = 16.11 min.

**<sup>1</sup>H NMR** (400 MHz, CDCl<sub>3</sub>)  $\delta$  8.18 (s, 1H), 7.75 – 7.71 (m, 2H), 7.48 – 7.45 (m, 2H), 7.36 – 7.34 (m, 2H), 7.27 – 7.16 (m, 7H), 7.09 – 7.05 (m, 1H), 4.79 (d, *J* = 15.2 Hz, 1H), 4.26 – 4.18 (m, 2H), 2.11 – 2.00 (m, 1H), 1.55 – 1.44 (m, 1H), 0.63 (t, *J* = 7.4 Hz, 3H).

**<sup>13</sup>C NMR** (100 MHz, CDCl<sub>3</sub>)  $\delta$  167.2, 139.6, 138.4, 137.3, 135.6, 129.5, 128.9, 128.7, 128.53, 128.51, 127.9, 124.2, 119.6, 62.0, 48.5, 21.3, 11.0.

**HRMS** (ESI) *m/z* calcd. for C<sub>23</sub>H<sub>24</sub>ClN<sub>2</sub>O<sub>3</sub>S [*M* + *H*]<sup>+</sup> 443.1191, found 443.1192.

**(S)-N-Benzyl-4-chloro-N-(1-hydroxybutan-2-yl)benzenesulfonamide (189)**

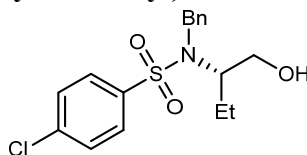

**189**

**HPLC** analysis: Chiralcel ID (*n*-hexane/*i*-PrOH = 80/20, flow rate 1.0 mL/min,  $\lambda$  = 254 nm), *t*<sub>R</sub> (minor) = 12.18 min, *t*<sub>R</sub> (major) = 13.93 min.

**<sup>1</sup>H NMR** (400 MHz, CDCl<sub>3</sub>)  $\delta$  7.75 – 7.73 (m, 2H), 7.46 – 7.44 (m, 2H), 7.39 – 7.37 (m, 2H), 7.34 – 7.28 (m, 3H), 4.60 (d, *J* = 15.5 Hz, 1H), 4.21 (d, *J* = 15.6 Hz, 1H), 3.81 – 3.74 (m, 1H), 3.44 – 3.31 (m, 2H), 1.50 – 1.39 (m, 1H), 1.37 – 1.26 (m, 2H), 0.68 (t, *J* = 7.4 Hz, 3H).

$^{13}\text{C}$  NMR (100 MHz,  $\text{CDCl}_3$ )  $\delta$  139.5, 138.9, 137.4, 129.2, 128.7, 128.6, 128.2, 127.9, 63.3, 62.5, 47.8, 22.2, 11.2.

HRMS (ESI)  $m/z$  calcd. for  $\text{C}_{17}\text{H}_{21}\text{ClINO}_3\text{S}$   $[\text{M} + \text{H}]^+$  354.0925, found 354.0918.

### The synthesis of (*R*)- $\gamma$ -secretase inhibitor

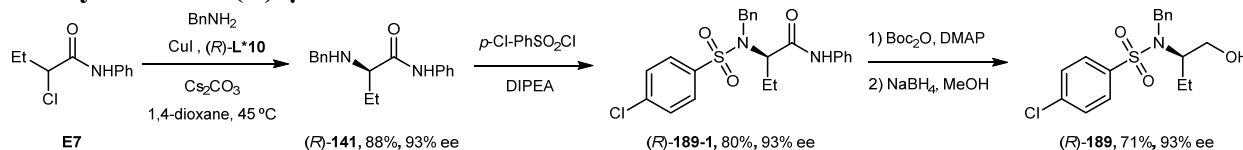

According to **General Procedure H** with 2-chloro-*N*-phenylbutanamide **E7** (788.2 mg, 4.0 mmol, 2.0 equiv.), benzylamine **A1** (214.1 mg, 2.0 mmol, 1.0 equiv.), and (*R*)-**L\*10** (129.4 mg, 0.3 mmol, 15 mol%) for 72 h, the reaction mixture was purified by column chromatography on silica gel (petroleum ether/EtOAc = 2/1) to yield the product (*R*)-**141** as a colorless oil (473.5 mg, 88% yield, 93% e.e.).

To a solution of (*R*)-**141** (53.6 mg, 0.2 mmol, 1.0 equiv.) and 4-chlorobenzenesulfonyl chloride (167.9 mg, 0.8 mmol, 4.0 equiv.) in  $\text{CH}_3\text{CN}$  (4.0 mL) was added DIPEA (51.7 mg, 0.4 mmol, 2.0 equiv.) at 0 °C. Then the reaction mixture was warmed up to room temperature and stirred for 48 h. After completion (monitored by TLC), the reaction was quenched with HCl aqueous solution (1.0 M, 10 mL) and extracted with EtOAc three times. The combined organic phase was washed with brine, dried over  $\text{Na}_2\text{SO}_4$ , filtrated and concentrated to afford the crude product, which was purified by flash column chromatography on silica gel (petroleum ether/EtOAc = 5/1) to yield the product (*R*)-**189-1** as a white solid (70.8 mg, 80% yield, 93% e.e.).

To a solution of (*R*)-**189-1** (53.1 mg, 0.12 mmol, 1.0 equiv.) in  $\text{CH}_3\text{CN}$  (2.0 mL) was added  $\text{Boc}_2\text{O}$  (130.9 mg, 0.6 mmol, 5.0 equiv.) and DMAP (29.3 mg, 0.24 mmol, 2.0 equiv.) at 0 °C. Then the reaction mixture was warmed up to room temperature and stirred for 1 h. After completion (monitored by TLC), the reaction was quenched with HCl aqueous solution (1.0 M, 10 mL) and extracted with EtOAc three times. The combined organic phase was washed with brine, dried over  $\text{Na}_2\text{SO}_4$ , filtrated and concentrated to afford the crude product, which was used in the next step without further purification.

To a solution of the above crude product in  $\text{CH}_3\text{OH}$  (2.0 mL) was added  $\text{NaBH}_4$  (18.3 mg, 0.48 mmol, 4.0 equiv.) slowly at 0 °C. Then the reaction mixture was warmed up to room temperature and stirred for 1 h. After completion (monitored by TLC), the reaction was quenched by saturated  $\text{NH}_4\text{Cl}$  solution (10 mL) and extracted with  $\text{CH}_2\text{Cl}_2$  three times. The combined organic phase was washed with brine, dried over  $\text{Na}_2\text{SO}_4$ , filtrated and concentrated to afford the crude product, which was purified by flash column chromatography on silica gel (petroleum ether/EtOAc = 3/1) to yield the product (*R*)-**189** as a yellowish oil (30.0 mg, 71% yield, 93% e.e.).

### (*R*)-2-((*N*-Benzyl-4-chlorophenyl)sulfonamido)-*N*-phenylbutanamide ((*R*)-189-1)

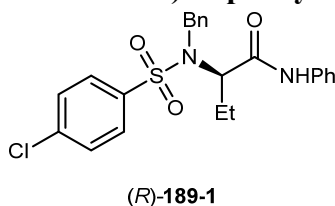

HPLC analysis: Chiralcel IA (*n*-hexane/*i*-PrOH = 90/10, flow rate 1.0 mL/min,  $\lambda$  = 254 nm),  $t_R$

(minor) = 11.59 min,  $t_R$  (major) = 15.97 min.

**(*R*)-*N*-Benzyl-4-chloro-*N*-(1-hydroxybutan-2-yl)benzenesulfonamide ((*R*)-189)**

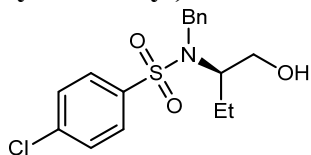

**(*R*)-189**

**HPLC** analysis: Chiralcel ID (*n*-hexane/*i*-PrOH = 80/20, flow rate 1.0 mL/min,  $\lambda$  = 254 nm),  $t_R$  (minor) = 12.07 min,  $t_R$  (major) = 14.00 min.



## 8. Mechanistic studies

### Catalytic activity of the in situ formed catalyst in reactions with repeated addition of additional substrates

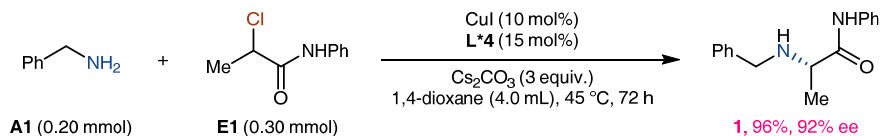

Under argon atmosphere, an oven-dried resealable Schlenk tube equipped with a magnetic stir bar was charged with CuI (3.8 mg, 0.02 mmol, 10 mol%), L\*4 (15.4 mg, 0.03 mmol, 15 mol%), Cs<sub>2</sub>CO<sub>3</sub> (195.5 mg, 0.60 mmol, 3.0 equiv.), and anhydrous 1,4-dioxane (2.0 mL). Then, the mixture was stirred at room temperature for 1 h. After that, 2-chloro-*N*-phenylpropanamide **E1** (54.9 mg, 0.30 mmol, 1.5 equiv.), benzylamine **A1** (21.4 mg, 0.20 mmol, 1.0 equiv.), and anhydrous 1,4-dioxane (2.0 mL) were sequentially added into the mixture and the reaction mixture was stirred at 45 °C for 72 h. Upon completion (monitored by TLC), the precipitate was filtered off and washed by EtOAc. The filtrate was evaporated and the residue was purified by flash column chromatography on silica gel (petroleum ether/EtOAc = 1/1) to yield the product **1** as a white solid (48.6 mg, 96% yield, 92% e.e.).

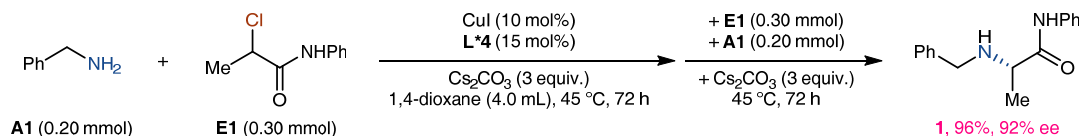

Under argon atmosphere, an oven-dried resealable Schlenk tube equipped with a magnetic stir bar was charged with CuI (3.8 mg, 0.02 mmol, 10 mol%), L\*4 (15.4 mg, 0.03 mmol, 15 mol%), Cs<sub>2</sub>CO<sub>3</sub> (195.5 mg, 0.60 mmol, 3.0 equiv.), and anhydrous 1,4-dioxane (2.0 mL). Then, the mixture was stirred at room temperature for 1 h. After that, 2-chloro-*N*-phenylpropanamide **E1** (54.9 mg, 0.30 mmol, 1.5 equiv.), benzylamine **A1** (21.4 mg, 0.20 mmol, 1.0 equiv.), and anhydrous 1,4-dioxane (2.0 mL) were sequentially added into the mixture and the reaction mixture was stirred at 45 °C for 72 h. Next, Cs<sub>2</sub>CO<sub>3</sub> (195.5 mg, 0.60 mmol, 3.0 equiv.), 2-chloro-*N*-phenylpropanamide **E1** (54.9 mg, 0.30 mmol, 1.5 equiv.), and benzylamine **A1** (21.4 mg, 0.20 mmol, 1.0 equiv.), were sequentially added into the mixture and the reaction mixture was stirred at 45 °C for 72 h. Upon completion (monitored by TLC), the precipitate was filtered off and washed by EtOAc. The filtrate was evaporated and the residue was purified by flash column chromatography on silica gel (petroleum ether/EtOAc = 1/1) to yield the product **1** as a white solid (97.6 mg, 96% yield, 92% e.e.).

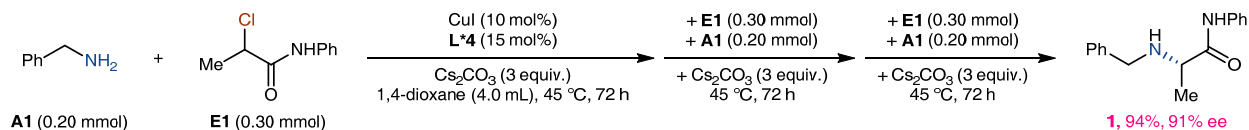

Under argon atmosphere, an oven-dried resealable Schlenk tube equipped with a magnetic stir bar was charged with CuI (3.8 mg, 0.02 mmol, 10 mol%), L\*4 (15.4 mg, 0.03 mmol, 15 mol%), Cs<sub>2</sub>CO<sub>3</sub> (195.5 mg, 0.60 mmol, 3.0 equiv.), and anhydrous 1,4-dioxane (2.0 mL). Then, the mixture was stirred at room temperature for 1 h. After that, 2-chloro-*N*-phenylpropanamide **E1** (54.9 mg, 0.30 mmol, 1.5 equiv.), benzylamine **A1** (21.4 mg, 0.20 mmol, 1.0 equiv.), and anhydrous 1,4-dioxane (2.0 mL) were sequentially added into the mixture and the reaction

mixture was stirred at 45 °C for 72 h. Next, Cs<sub>2</sub>CO<sub>3</sub> (195.5 mg, 0.60 mmol, 3.0 equiv.), 2-chloro-*N*-phenylpropanamide **E1** (54.9 mg, 0.30 mmol, 1.5 equiv.), and benzylamine **A1** (21.4 mg, 0.20 mmol, 1.0 equiv.), were sequentially added into the mixture and the reaction mixture was stirred at 45 °C for 72 h. Then, Cs<sub>2</sub>CO<sub>3</sub> (195.5 mg, 0.60 mmol, 3.0 equiv.), 2-chloro-*N*-phenylpropanamide **E1** (54.9 mg, 0.30 mmol, 1.5 equiv.), and benzylamine **A1** (21.4 mg, 0.20 mmol, 1.0 equiv.), were sequentially added into the mixture and the reaction mixture was stirred at 45 °C for 72 h. Upon completion (monitored by TLC), the precipitate was filtered off and washed by EtOAc. The filtrate was evaporated and the residue was purified by flash column chromatography on silica gel (petroleum ether/EtOAc = 1/1) to yield the product **1** as a white solid (142.9 mg, 94% yield, 91% e.e.).

#### UV spectroscopic analysis on the stability of L\*4CuOAc in the presence of benzylamine

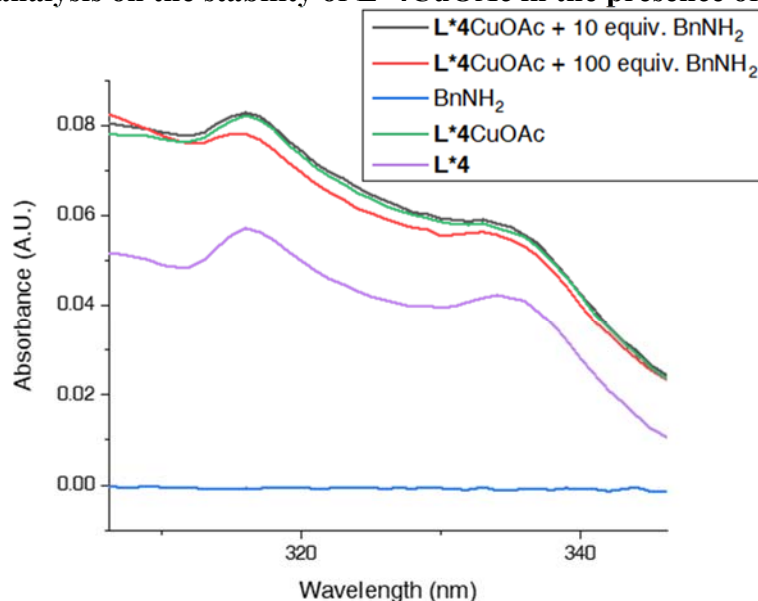

A solution of L\*4CuOAc and benzylamine **A1** (10 or 100 equiv.) in acetonitrile was stirred at 80 °C for 0.5 h under argon and then, was evacuated under reduced pressure. The residue was dissolved in dichloromethane to make a 0.01 mM solution for UV–vis spectroscopic analysis. The ligand displacement hardly occurred in the presence of 10 equiv. of benzylamine and only slightly occurred (ca. 16%) when the amount of benzylamine was increased to 100 equiv.

#### Preparation and characterization of complex C1

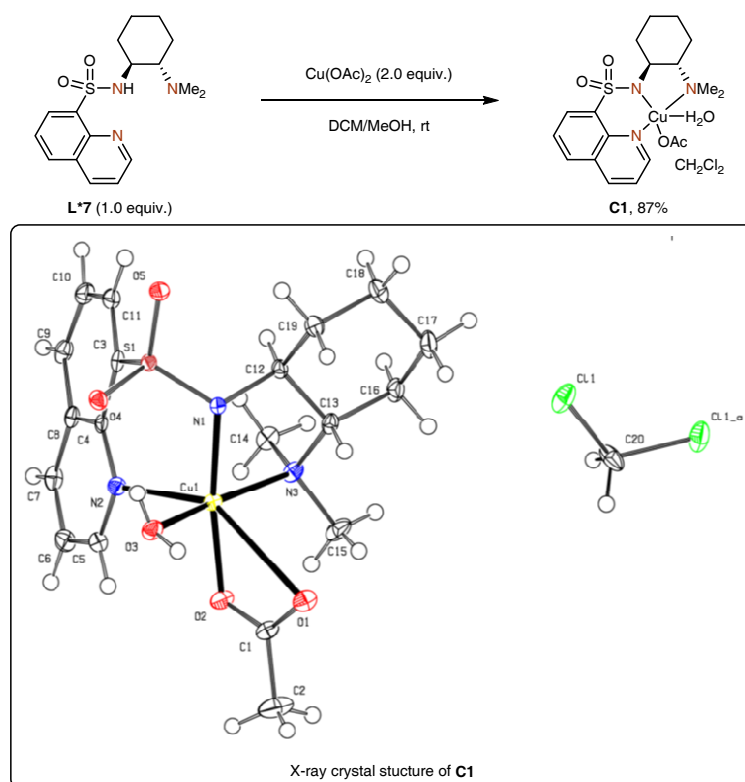

To a solution of  $\text{Cu}(\text{OAc})_2$  (36.2 mg, 0.20 mmol) in methanol (4 mL), **L\*7** (33.3 mg, 0.10 mmol) was added and stirred overnight. Then the solution was concentrated in vacuo, the residue dissolved in  $\text{CH}_2\text{Cl}_2$  (10 mL) and filtered. The crude reaction product was recrystallized from dichloromethane/hexane to obtain pure product **C1** (48.6 mg, 87% yield).

### The catalytic activity of complex **C1**

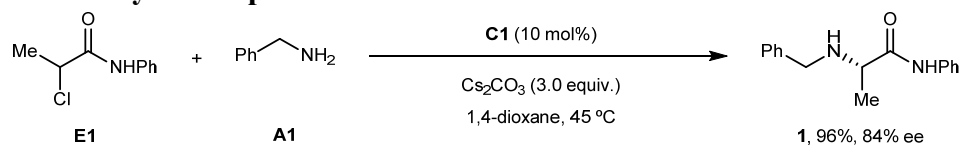

Under argon atmosphere, an oven-dried resealable Schlenk tube equipped with a magnetic stir bar was charged with **C1** (2.8 mg, 0.005 mmol, 10 mol%),  $\text{Cs}_2\text{CO}_3$  (48.9 mg, 0.15 mmol, 3.0 equiv.), 2-chloro-*N*-phenylpropanamide **E1** (13.73, 0.075 mmol, 1.5 equiv.), benzylamine **A1** (5.4 mg, 0.05 mmol, 1.0 equiv.) and anhydrous 1,4-dioxane (1.0 mL) were sequentially added into the mixture and the reaction mixture was stirred at 45 °C for 72 h. Upon completion (monitored by TLC), the precipitate was filtered off and washed by EtOAc. The filtrate was evaporated and afforded the desired product **1** (yield of **1** was based on  $^1\text{H}$  NMR analysis of the crude product using 1,3,5-trimethoxybenzene as an internal standard, 96%, 84% e.e.).

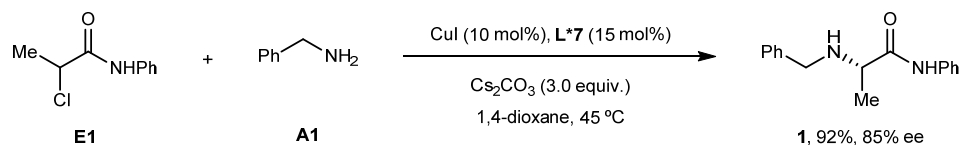

Under argon atmosphere, an oven-dried resealable Schlenk tube equipped with a magnetic stir

bar was charged with CuI (0.9 mg, 0.005 mmol, 10 mol%), **L\*7** (2.5 mg, 0.0075 mmol, 15 mol%), Cs<sub>2</sub>CO<sub>3</sub> (48.9 mg, 0.15 mmol, 3.0 equiv.), and anhydrous 1,4-dioxane (0.5 mL). Then, the mixture was stirred at room temperature for 1 h. After that, 2-chloro-*N*-phenylpropanamide **E1** (13.7, 0.075 mmol, 1.5 equiv.), benzylamine **A1** (5.4 mg, 0.05 mmol, 1.0 equiv.), and anhydrous 1,4-dioxane (0.5 mL) were sequentially added into the mixture and the reaction mixture was stirred at 45 °C for 72 h. Upon completion (monitored by TLC), the precipitate was filtered off and washed by EtOAc. The filtrate was evaporated and afforded the desired product **1** (yield of **1** was based on <sup>1</sup>H NMR analysis of the crude product using 1,3,5-trimethoxybenzene as an internal standard, 92%, 85% e.e.).

### The effect of ligand and copper salt on the reaction

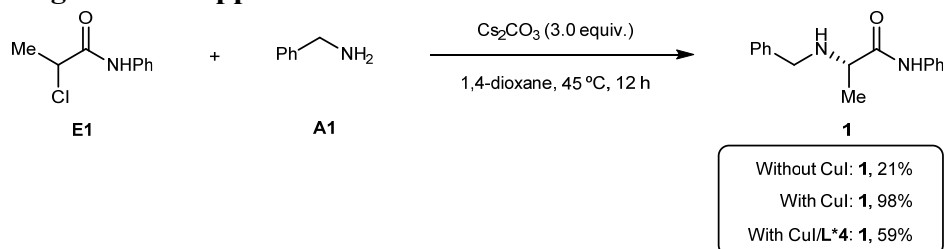

Under argon atmosphere, an oven-dried resealable Schlenk tube equipped with a magnetic stir bar was charged with CuI (0.9 mg, 0.005 mmol, 10 mol%), **L\*4** (3.9 mg, 0.0075 mmol, 15 mol%), Cs<sub>2</sub>CO<sub>3</sub> (48.9 mg, 0.15 mmol, 3.0 equiv.), and anhydrous 1,4-dioxane (0.5 mL). Then, the mixture was stirred at room temperature for 1 h. After that, 2-chloro-*N*-phenylpropanamide **E1** (13.73, 0.075 mmol, 1.5 equiv.), benzylamine **A1** (5.4 mg, 0.05 mmol, 1.0 equiv.) and anhydrous 1,4-dioxane (0.5 mL) were sequentially added into the mixture and the reaction mixture was stirred at 45 °C for 12 h. Upon completion, the precipitate was filtered off and washed by EtOAc. The filtrate was evaporated and afforded the desired product **1** (yield of **1** was based on <sup>1</sup>H NMR analysis of the crude product using 1,3,5-trimethoxybenzene as an internal standard, 59%, 92% e.e.).

The procedure for the reaction without CuI and **L\*4** was the same with that described above except that CuI and **L\*4** was not added. The desired product **1** (yield of **1** was based on <sup>1</sup>H NMR analysis of the crude product using 1,3,5-trimethoxybenzene as an internal standard, 21%).

The procedure for the reaction without **L\*4** was the same with that described above except that **L\*4** was not added. The desired product **1** (yield of **1** was based on <sup>1</sup>H NMR analysis of the crude product using 1,3,5-trimethoxybenzene as an internal standard, 98%).

### The non-linear effect of catalyst

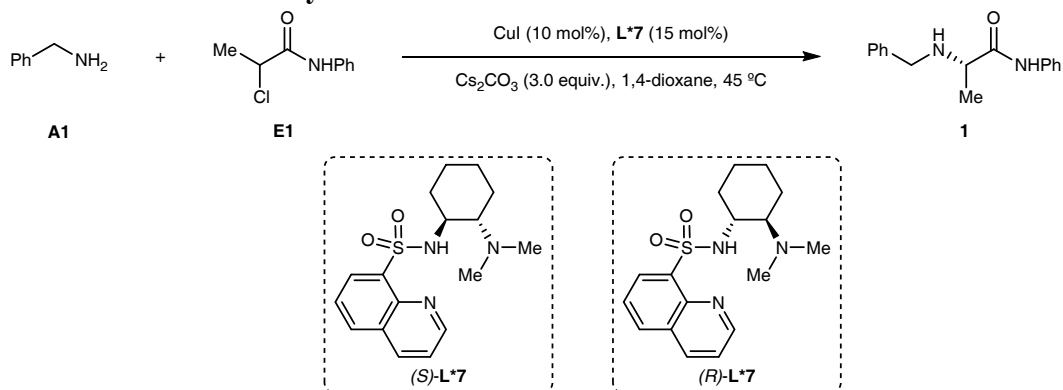

Under argon atmosphere, an oven-dried resealable Schlenk tube equipped with a magnetic stir bar was charged with CuI (0.9 mg, 0.005 mmol, 10 mol%), **L\*7** (2.5 mg, 0.0075 mmol, 15 mol%), Cs<sub>2</sub>CO<sub>3</sub> (48.9 mg, 0.15 mmol, 3.0 equiv.), and anhydrous 1,4-dioxane (0.5 mL). Then, the mixture was stirred at room temperature for 1 h. After that, 2-chloro-*N*-phenylpropanamide **E1** (13.7, 0.075 mmol, 1.5 equiv.), benzylamine **A1** (5.4 mg, 0.05 mmol, 1.0 equiv.), and anhydrous 1,4-dioxane (0.5 mL) were sequentially added into the mixture and the reaction mixture was stirred at 45 °C for 72 h. Upon completion (monitored by TLC), the products were separated by preparative thin-layer chromatography on silica gel. The e.e. values of products were then determined by HPLC, which indicated a linear relationship between e.e. values of products and corresponding catalysts. The catalyst **L\*7** with different e.e. values were prepared by mixing (*S*)-**L\*7** (99% e.e.) and (*R*)-**L\*7** (99% e.e.) in appropriate ratios.

| Entry | Catalyst e.e. (%) | Product e.e. (%) |
|-------|-------------------|------------------|
| 1     | 99                | 86               |
| 2     | 60                | 44               |
| 3     | 20                | 13               |
| 4     | 0                 | 0                |
| 5     | -20               | -15              |
| 6     | -60               | -46              |
| 7     | -99               | -88              |

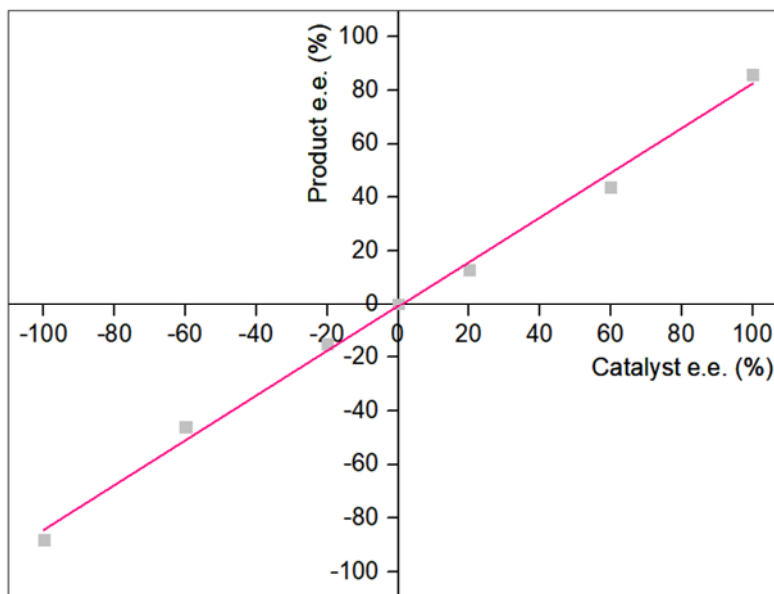

#### EPR and HRMS Experiments for the detection of intermediate during the reaction

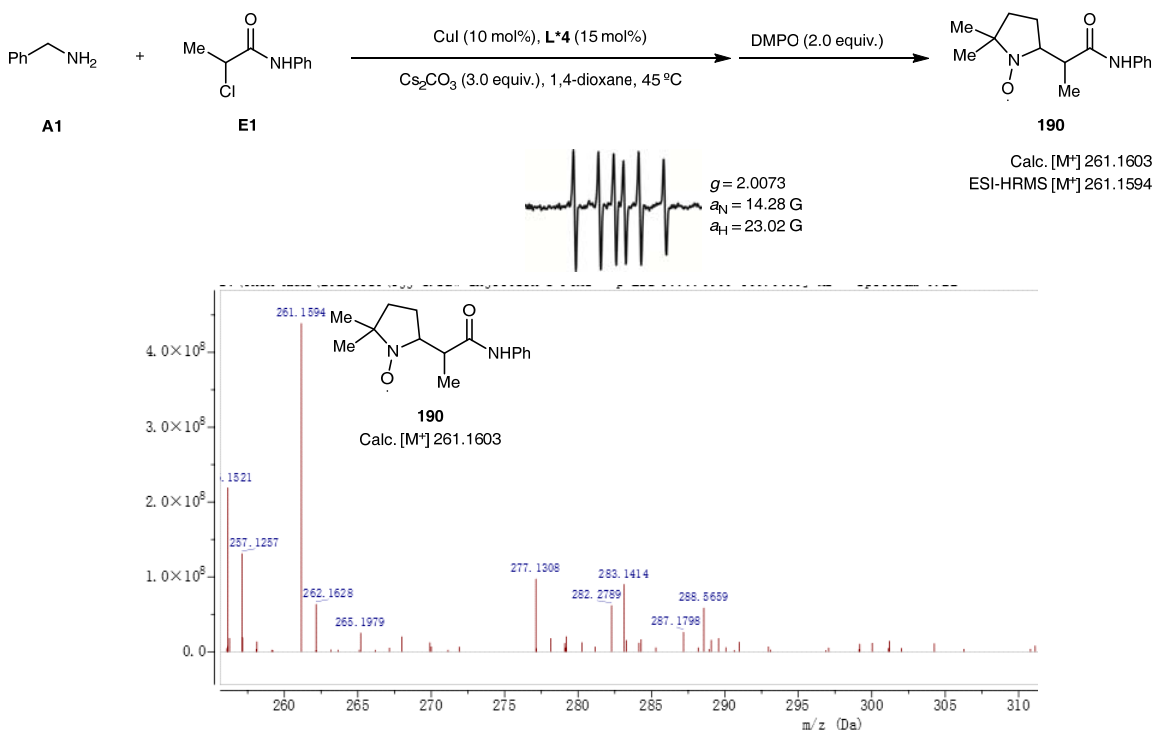

Under argon atmosphere, an oven-dried resealable Schlenk tube equipped with a magnetic stir bar was charged with CuI (0.9 mg, 0.005 mmol, 10 mol%), **L\*4** (3.9 mg, 0.0075 mmol, 15 mol%), Cs<sub>2</sub>CO<sub>3</sub> (48.9 mg, 0.15 mmol, 3.0 equiv.), and anhydrous 1,4-dioxane (0.5 mL). Then, the mixture was stirred at room temperature for 1 h. After that, 2-chloro-*N*-phenylpropanamide **E1** (13.7, 0.075 mmol, 1.5 equiv.), benzylamine **A1** (5.4 mg, 0.05 mmol, 1.0 equiv.), and anhydrous 1,4-dioxane (0.5 mL) were sequentially added into the mixture and the reaction mixture was stirred at 45 °C for 4 h. Next, 5,5-dimethyl-1-pyrroline *N*-oxide DMPO (2.0 equiv.) was added and the reaction mixture was stirred at 45 °C for another 1 h. The resulting reaction mixture was analyzed by EPR. Spin trapping experiments support the intermediacy of carbon-centered radicals in the alkylation reaction. Persistent nitroxyl radical **190** was formed. Meanwhile, the proposed radical adducts **190** were consistent with the results of ESI-HRMS. Therefore, we can conclude the formation of carbon center radical in this system.

### Radical clock experiments

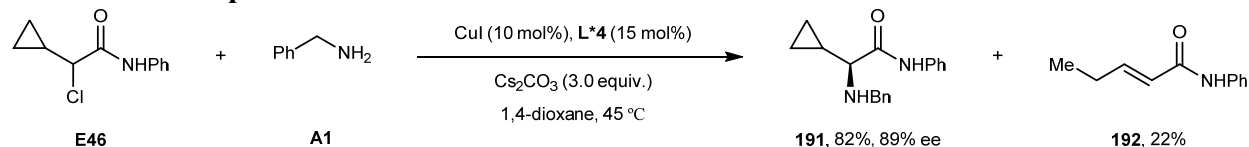

Under argon atmosphere, an oven-dried resealable Schlenk tube equipped with a magnetic stir bar was charged with CuI (3.8 mg, 0.02 mmol, 10 mol%), **L\*4** (15.4 mg, 0.03 mmol, 15 mol%), Cs<sub>2</sub>CO<sub>3</sub> (195.5 mg, 0.60 mmol, 3.0 equiv.), and anhydrous 1,4-dioxane (2.0 mL). Then, the mixture was stirred for at room temperature 1 h. After that, 2-chloro-2-cyclopropyl-*N*-phenylacetamide **E46** (62.7 mg, 0.30 mmol, 1.5 equiv.), benzylamine **A1** (21.4 mg, 0.20 mmol, 1.0 equiv.) and anhydrous 1,4-dioxane (2.0 mL) were sequentially added into the mixture and the reaction mixture was stirred at 45 °C for 72 h. Upon completion (monitored by TLC), the precipitate was filtered off and washed by EtOAc. The filtrate was evaporated and the residue

was purified by flash column chromatography on silica gel (petroleum ether/EtOAc = 10/1 to 2/1) to yield the product **191** as a colorless oil (46.2 mg, 82% yield, 89% e.e.) and **192** as a colorless oil (7.6 mg, 22% yield).

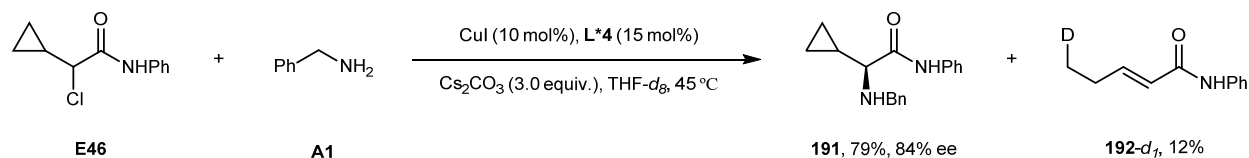

Under argon atmosphere, an oven-dried resealable Schlenk tube equipped with a magnetic stir bar was charged with CuI (3.8 mg, 0.02 mmol, 10 mol%), **L\*4** (15.4 mg, 0.03 mmol, 15 mol%), Cs<sub>2</sub>CO<sub>3</sub> (195.5 mg, 0.60 mmol, 3.0 equiv.), and THF-*d*<sub>8</sub> (1.0 mL). Then, the mixture was stirred at room temperature for 1 h. After that, 2-chloro-2-cyclopropyl-*N*-phenylacetamide **E46** (62.7 mg, 0.30 mmol, 1.5 equiv.), benzylamine **A1** (21.4 mg, 0.20 mmol, 1.0 equiv.) and THF-*d*<sub>8</sub> (1.0 mL) were sequentially added into the mixture and the reaction mixture was stirred at 45 °C for 72 h. Upon completion (monitored by TLC), the precipitate was filtered off and washed by EtOAc. The filtrate was evaporated and the residue was purified by flash column chromatography on silica gel (petroleum ether/EtOAc = 10/1 to 2/1) to yield the product **191** as a colorless oil (44.2 mg, 79% yield, 84% e.e.) and **192-*d*<sub>1</sub>** as a colorless oil (4.1 mg, 12% yield).

#### (*S*)-2-(Benzylamino)-2-cyclopropyl-*N*-phenylacetamide (**191**)

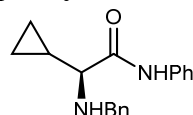

**191**

**HPLC** analysis: Chiralcel IC (*n*-hexane/*i*-PrOH = 93/7, flow rate 1.0 mL/min, λ = 254 nm), *t*<sub>R</sub> (major) = 12.89 min, *t*<sub>R</sub> (minor) = 23.14 min.

**<sup>1</sup>H NMR** (400 MHz, CDCl<sub>3</sub>) δ 9.28 (s, 1H), 7.62 – 7.59 (m, 2H), 7.37 – 7.26 (m, 7H), 7.12 – 7.07 (m, 1H), 3.81 (d, *J* = 13.3 Hz, 1H), 3.70 (d, *J* = 13.3 Hz, 1H), 2.50 (d, *J* = 9.1 Hz, 1H), 2.10 (s, 1H), 1.06 – 0.97 (m, 1H), 0.72 – 0.49 (m, 3H), 0.24 – 0.18 (m, 1H).

**<sup>13</sup>C NMR** (100 MHz, CDCl<sub>3</sub>) δ 171.5, 139.1, 137.8, 128.9, 128.6, 128.0, 127.4, 123.9, 119.3, 67.9, 52.7, 15.8, 3.7, 3.4.

**HRMS** (ESI) *m/z* calcd. for C<sub>18</sub>H<sub>21</sub>N<sub>2</sub>O [*M* + *H*]<sup>+</sup> 281.1648, found 281.1647.

#### (*E*)-*N*-Phenylpent-2-enamide (**192**)

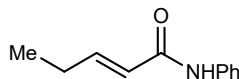

**192**

**<sup>1</sup>H NMR** (400 MHz, CDCl<sub>3</sub>) δ 7.57 – 7.55 (m, 2H), 7.35 – 7.30 (m, 2H), 7.23 (s, 1H), 7.13 – 7.09 (m, 1H), 7.04 (dt, *J* = 15.2, 6.4 Hz, 1H), 5.92 (dt, *J* = 15.2, 1.7 Hz, 1H), 2.30 – 2.22 (m, 2H), 1.10 (t, *J* = 7.4 Hz, 3H).

**<sup>13</sup>C NMR** (100 MHz, CDCl<sub>3</sub>) δ 164.2, 147.9, 138.0, 129.0, 124.2, 122.9, 119.8, 25.2, 12.4.

**HRMS** (ESI) *m/z* calcd. for C<sub>11</sub>H<sub>14</sub>NO [*M* + *H*]<sup>+</sup> 176.1070, found 176.1069.

#### (*E*)-5-*d*-*N*-Phenylpent-2-enamide (**192-*d*<sub>1</sub>**)

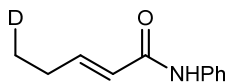

**192-d<sub>1</sub>**

**<sup>1</sup>H NMR** (400 MHz, CDCl<sub>3</sub>) δ 7.57 – 7.52 (m, 2H), 7.35 – 7.30 (m, 2H), 7.17 (s, 1H), 7.13 – 7.09 (m, 1H), 7.04 (dt, *J* = 15.2, 6.4 Hz, 1H), 5.91 (dt, *J* = 15.3, 1.8 Hz, 1H), 2.31 – 2.20 (m, 2H), 1.10 (t, *J* = 7.4 Hz, 2H).

**<sup>13</sup>C NMR** (100 MHz, CDCl<sub>3</sub>) δ 164.1, 147.9, 138.0, 129.0, 124.2, 122.9, 119.9, 25.2, 12.4.

**<sup>2</sup>H NMR** (92 MHz, CHCl<sub>3</sub>) δ 1.11 (s, 1H).

**HRMS** (ESI) *m/z* calcd. for C<sub>11</sub>H<sub>13</sub>DNO [M + H]<sup>+</sup> 177.1133, found 177.1135.

### The likely formation of alkyl radicals in the absence of amines

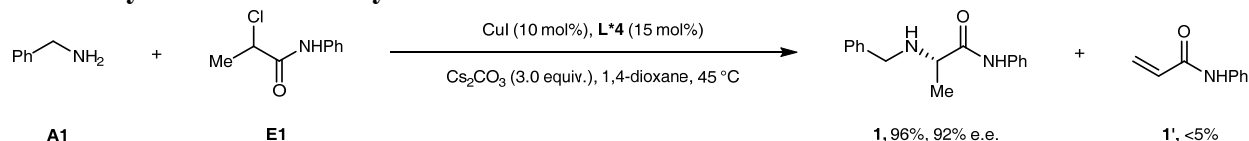

Under argon atmosphere, an oven-dried resealable Schlenk tube equipped with a magnetic stir bar was charged with CuI (3.8 mg, 0.02 mmol, 10 mol%), **L\*4** (15.4 mg, 0.03 mmol, 15 mol%), Cs<sub>2</sub>CO<sub>3</sub> (195.5 mg, 0.60 mmol, 3.0 equiv.), and anhydrous 1,4-dioxane (2.0 mL). Then, the mixture was stirred at room temperature for 1 h. After that, 2-chloro-*N*-phenylpropanamide **E1** (54.9 mg, 0.30 mmol, 1.5 equiv.), benzylamine **A1** (21.4 mg, 0.20 mmol, 1.0 equiv.), and anhydrous 1,4-dioxane (2.0 mL) were sequentially added into the mixture and the reaction mixture was stirred at 45 °C for 72 h. Upon completion (monitored by TLC), the precipitate was filtered off and washed by EtOAc. The filtrate was evaporated and the residue was purified by flash column chromatography on silica gel (petroleum ether/EtOAc = 1/1) to yield the product **1** as a white solid (48.6 mg, 96% yield, 92% e.e.).

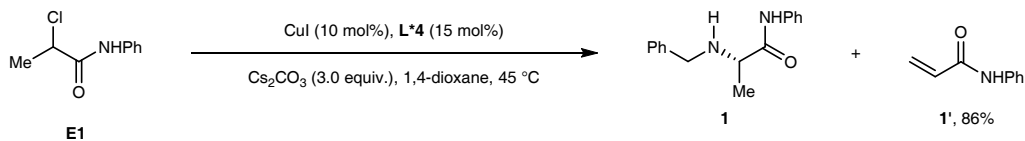

Under argon atmosphere, an oven-dried resealable Schlenk tube equipped with a magnetic stir bar was charged with CuI (3.8 mg, 0.02 mmol, 10 mol%), **L\*4** (15.4 mg, 0.03 mmol, 15 mol%), Cs<sub>2</sub>CO<sub>3</sub> (195.5 mg, 0.60 mmol, 3.0 equiv.), and anhydrous 1,4-dioxane (2.0 mL). Then, the mixture was stirred at room temperature for 1 h. After that, 2-chloro-*N*-phenylpropanamide **E1** (36.6 mg, 0.20 mmol, 1.0 equiv.) and anhydrous 1,4-dioxane (2.0 mL) were sequentially added into the mixture and the reaction mixture was stirred at 45 °C for 24 h. Upon completion (monitored by TLC), the precipitate was filtered off and washed by EtOAc. The filtrate was evaporated and the residue was purified by flash column chromatography on silica gel (petroleum ether/EtOAc = 5/1) to yield the product **1'** as a white solid (25.4 mg, 86% yield).

### *N*-Phenylacrylamide (**1'**)

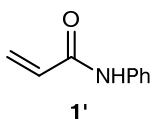



**<sup>1</sup>H NMR** (400 MHz, CDCl<sub>3</sub>) δ 7.72 (s, 1H), 7.60 – 7.58 (m, 2H), 7.34 – 7.30 (m, 2H), 7.14 – 7.10 (m, 1H), 6.45 – 6.40 (m, 1H), 6.31 – 6.25 (m, 1H), 5.76 – 5.73 (m, 1H).

**<sup>13</sup>C NMR** (100MHz, CDCl<sub>3</sub>) δ 163.7, 137.7, 131.2, 129.0, 127.8, 124.5, 120.0.

**HRMS** (ESI) *m/z* calcd. for C<sub>9</sub>H<sub>10</sub>NO [M + H]<sup>+</sup> 148.0757, found 148.0759.

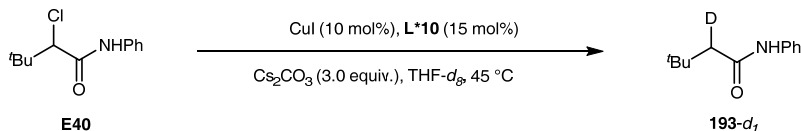

Under argon atmosphere, an oven-dried resealable Schlenk tube equipped with a magnetic stir bar was charged with CuI (3.8 mg, 0.02 mmol, 10 mol%), **L\*10** (12.9 mg, 0.03 mmol, 15 mol%), Cs<sub>2</sub>CO<sub>3</sub> (195.5 mg, 0.60 mmol, 3.0 equiv.), and THF-*d*<sub>8</sub> (0.5 mL). Then, the mixture was stirred at room temperature for 1 h. After that, 2-chloro-3,3-dimethyl-*N*-phenylbutanamide **E40** (45.0 mg, 0.20 mmol, 1.0 equiv.) and THF-*d*<sub>8</sub> (0.5 mL) were sequentially added into the mixture and the reaction mixture was stirred at 45 °C for 96 h. Upon completion (monitored by TLC), the precipitate was filtered off and washed by EtOAc. The filtrate was evaporated and the residue was purified by flash column chromatography on silica gel (petroleum ether/EtOAc = 10/1) to yield the product **193-d<sub>1</sub>** as a white solid (2.6 mg, 7% yield).

### 2-*d*-3,3-Dimethyl-*N*-phenylbutanamide (**193-d<sub>1</sub>**)

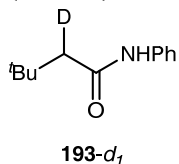

**<sup>1</sup>H NMR** (400 MHz, CDCl<sub>3</sub>) δ 7.52 – 7.50 (m, 2H), 7.34 – 7.30 (m, 2H), 7.12 – 7.04 (m, 2H), 2.23 (s, 1H), 1.11 (s, 9H).

**<sup>13</sup>C NMR** (100 MHz, CDCl<sub>3</sub>) δ 170.0, 137.8, 129.0, 124.2, 119.8, 51.7, 31.3, 29.8.

**<sup>2</sup>H NMR** (61 MHz, CHCl<sub>3</sub>) δ 2.23 (s, 1H).

**HRMS** (ESI) *m/z* calcd. for C<sub>12</sub>H<sub>17</sub>DNO [M + H]<sup>+</sup> 193.1446, found 193.1450.

### Mechanistic difference of the current N-alkylation with our previous C–N coupling

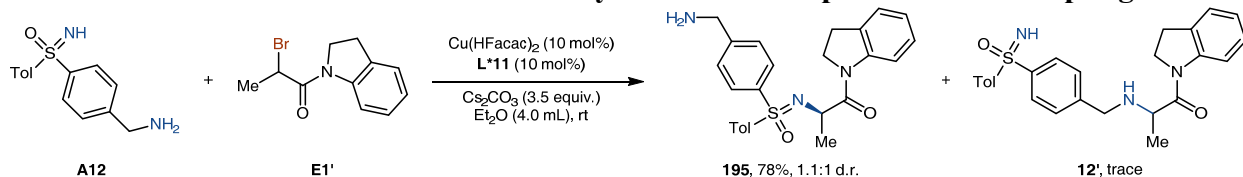

Under argon atmosphere, an oven-dried resealable Schlenk tube equipped with a magnetic stir bar was charged with (4-(aminomethyl)phenyl)(imino)(*p*-tolyl)-λ<sup>6</sup>-sulfanone **A12** (52.0 mg, 0.20 mmol, 1.0 equiv.), Cu(HFacac)<sub>2</sub> (8.8 mg, 0.020 mmol, 10 mol%), **L\*11** (20.5 mg, 0.020 mmol, 10 mol%), Cs<sub>2</sub>CO<sub>3</sub> (228.1 mg, 0.70 mmol, 3.5 equiv.) and anhydrous Et<sub>2</sub>O (4.0 mL). Then, 2-bromo-1-(indolin-1-yl)propan-1-one **E1'** (50.6 mg, 0.20 mmol, 1.0 equiv.) was added into the mixture and stirred at room temperature for 96 h. Upon completion (monitored by TLC), the precipitate was filtered off and washed with EtOAc. The filtrate was concentrated and the residue was purified by preparative thin-layer chromatography on silica gel (CH<sub>2</sub>Cl<sub>2</sub>/CH<sub>3</sub>OH = 10/1) to yield the product **195** as a yellowish oil (68.0 mg, 78% yield, 1:1.1 d.r.). The diastereomeric ratio was determined by crude <sup>1</sup>H NMR spectroscopy.

**(*S*)-(4-(Aminomethyl)phenyl)((1-(indolin-1-yl)-1-oxopropan-2-yl)imino)(*p*-tolyl)- $\lambda^6$ -sulfanone (195)**

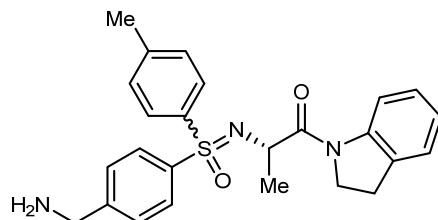

**195**

**<sup>1</sup>H NMR** (400 MHz, CDCl<sub>3</sub>)  $\delta$  8.23 – 8.19 (m, 1H), 7.95 – 7.93 (m, 1H), 7.86 – 7.84 (m, 2H), 7.78 – 7.76 (m, 1H), 7.47 – 7.45 (m, 1H), 7.38 – 7.36 (m, 1H), 7.24 – 7.22 (m, 1H), 7.17 – 7.10 (m, 3H), 7.00 – 6.95 (m, 1H), 4.27 – 4.19 (m, 1H), 4.08 – 3.87 (m, 6H), 3.10 – 2.94 (m, 2H), 2.35 (s, 1.43H), 2.26 (s, 1.57H), 1.44 – 1.40 (m, 3H).

**<sup>13</sup>C NMR** (100 MHz, CDCl<sub>3</sub>)  $\delta$  172.2, 172.1, 143.4, 143.3, 143.0, 140.3, 139.6, 138.0, 137.8, 131.32, 131.27, 129.8, 129.7, 128.5, 128.39, 128.35, 128.31, 128.26, 127.22, 127.20, 124.2, 123.6, 117.5, 51.9, 51.7, 47.6, 44.9, 44.7, 28.04, 28.01, 21.4, 21.3, 21.0, 20.9.

**HRMS** (ESI)  $m/z$  calcd. for C<sub>25</sub>H<sub>28</sub>N<sub>3</sub>O<sub>2</sub>S [M + H]<sup>+</sup> 434.1897, found 434.1904.

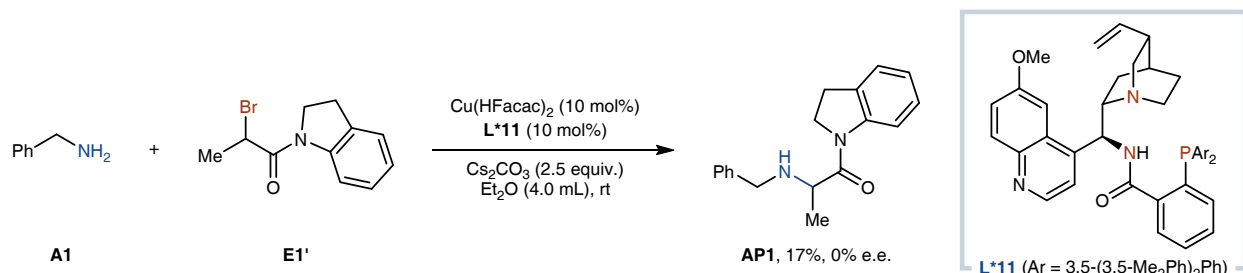

Under argon atmosphere, an oven-dried resealable Schlenk tube equipped with a magnetic stir bar was charged with 2-bromo-1-(indolin-1-yl)propan-1-one **E1'** (50.6 mg, 0.20 mmol, 1.0 equiv.) Cu(HFacac)<sub>2</sub> (8.8 mg, 0.020 mmol, 10 mol%), **L\*11** (20.5 mg, 0.02 mmol, 10 mol%), Cs<sub>2</sub>CO<sub>3</sub> (163.0 mg, 0.50 mmol, 2.5 equiv.) and anhydrous Et<sub>2</sub>O (4.0 mL). Then, benzylamine **A1** (21.4 mg, 0.20 mmol, 1.0 equiv.) was added into the mixture and stirred at room temperature for 36 h. Upon completion (monitored by TLC), the precipitate was filtered off and washed with EtOAc. The filtrate was concentrated and the residue was purified by column chromatography on silica gel (petroleum ether/EtOAc = 1/2) to afford the desired product **AP1** as a colorless oil (9.7 mg, 17% yield, 0% e.e.).

**2-(Benzylamino)-1-(indolin-1-yl)propan-1-one (AP1)**

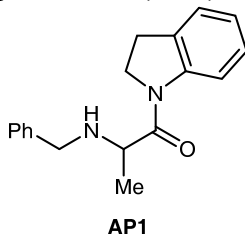

**AP1**

**HPLC analysis:** Chiralcel IG (*n*-hexane /*i*-PrOH = 80/20, flow rate 1.0 mL/min,  $\lambda$  = 254 nm),  $t_R$  (minor) = 14.22 min,  $t_R$  (major) = 18.91 min.

**<sup>1</sup>H NMR** (400 MHz, CDCl<sub>3</sub>) δ 8.32 (d, *J* = 8.0 Hz, 1H), 7.37 – 7.29 (m, 4H), 7.26 – 7.19 (m, 3H), 7.07 – 7.03 (m, 1H), 3.98 – 3.93 (m, 2H), 3.88 (d, *J* = 12.8 Hz, 1H), 3.62 (d, *J* = 12.8 Hz, 1H), 3.51 (q, *J* = 6.8 Hz, 1H), 3.18 (t, *J* = 8.5 Hz, 2H), 2.16 (s, 1H), 1.33 (d, *J* = 6.8 Hz, 3H).

**<sup>13</sup>C NMR** (100 MHz, CDCl<sub>3</sub>) δ 173.8, 142.8, 139.7, 131.1, 128.4, 128.3, 127.6, 127.0, 124.6, 124.0, 117.3, 54.8, 51.9, 47.3, 28.0, 19.0.

**HRMS** (ESI) *m/z* calcd. for C<sub>18</sub>H<sub>20</sub>N<sub>2</sub>O [M + H]<sup>+</sup> 281.1648, found 281.1651.

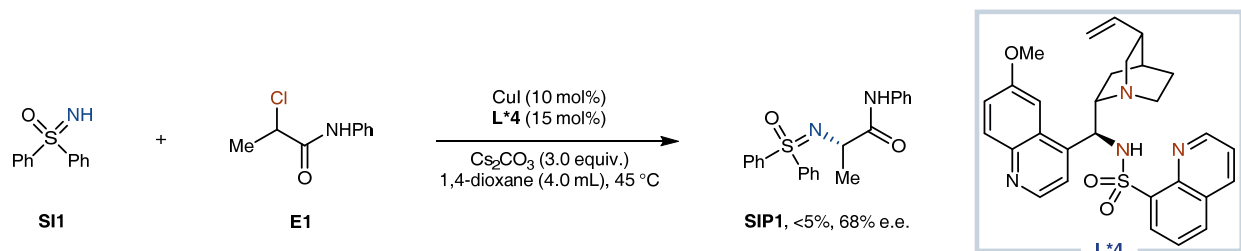

Under argon atmosphere, an oven-dried resealable Schlenk tube equipped with a magnetic stir bar was charged with CuI (3.8 mg, 0.02 mmol, 10 mol%), **L\*4** (15.4 mg, 0.03 mmol, 15 mol%), Cs<sub>2</sub>CO<sub>3</sub> (195.5 mg, 0.60 mmol, 3.0 equiv.), and anhydrous 1,4-dioxane (2.0 mL). Then, the mixture was stirred at room temperature for 1 h. After that, 2-chloro-*N*-phenylpropanamide **E1** (754.9 mg, 0.30 mmol, 1.5 equiv.), iminodiphenyl-λ<sup>6</sup>-sulfanone **SI1** (43.4 mg, 0.20 mmol, 1.0 equiv.) and anhydrous 1,4-dioxane (2.0 mL) were sequentially added into the mixture and the reaction mixture was stirred at 45 °C for 72 h. Upon completion (monitored by TLC), the precipitate was filtered off and washed by EtOAc. The filtrate was evaporated and afforded the desired product **SIP1** (yield of **SIP1** was based on <sup>1</sup>H NMR analysis of the crude product using 1,3,5-trimethoxybenzene as an internal standard, <5%, 68% e.e.)<sup>3</sup>.

## High resolution mass spectrum of [L\*4CuE-H]<sup>-</sup>

Zoom in, [C<sub>44</sub>H<sub>42</sub>CuFN<sub>5</sub>O<sub>4</sub>S]<sup>-</sup> weak

2 #200-203 RT: 2.18-2.20 AV: 4 NL: 1.89E6  
T: FTMS - p ESI Full ms [200.0000-850.0000]

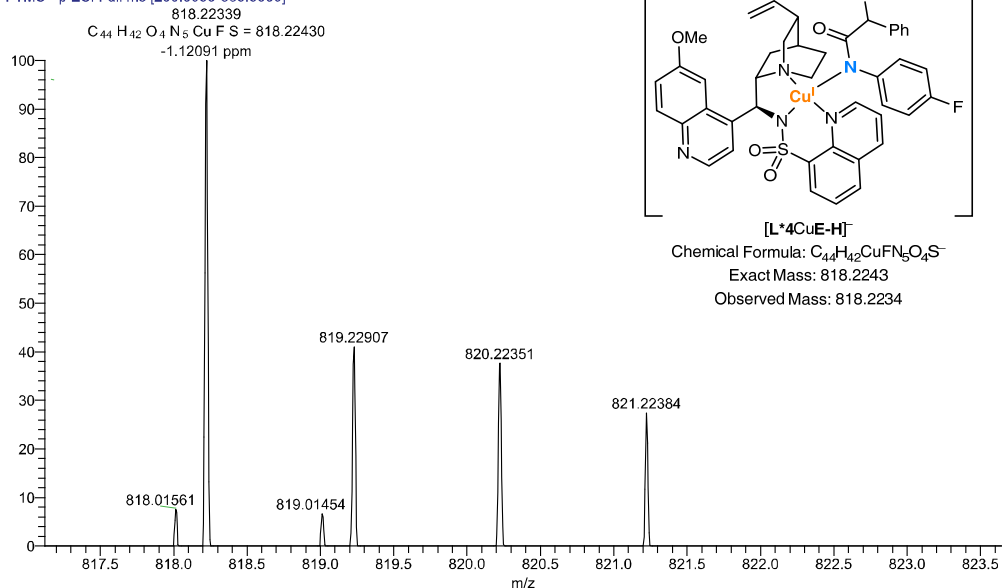

Theoretical spectrum of [C<sub>44</sub>H<sub>42</sub>CuFN<sub>5</sub>O<sub>4</sub>S]<sup>-</sup>

C<sub>44</sub>H<sub>42</sub>CuFN<sub>5</sub>O<sub>4</sub>S: C<sub>44</sub> H<sub>42</sub> Cu F<sub>1</sub> N<sub>5</sub> O<sub>4</sub> S<sub>1</sub> pa Chrg -1

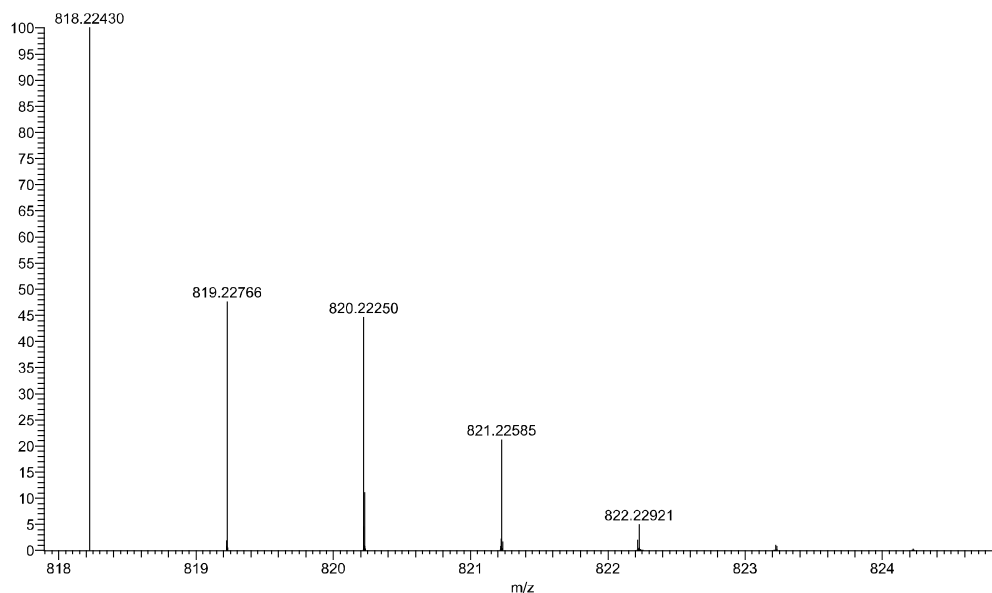

A solution of CuI (10 mol%), **L\*4** (15 mol%), and Cs<sub>2</sub>CO<sub>3</sub> (2.1 equiv.) in MeCN (2.0 mL) was stirred overnight at rt under argon and then, *N*-(4-fluorophenyl)-2-phenylpropanamide **E-H** (0.050 mmol) was added. The resulting mixture was stirred under the same conditions for 1 h before direct high-resolution mass spectroscopic analysis.

## High resolution mass spectrum of [L\*7CuE-H]<sup>-</sup>

Zoom in, [C<sub>32</sub>H<sub>35</sub>CuFN<sub>4</sub>O<sub>3</sub>S]<sup>-</sup>

3 #74-92 RT: 0.86-0.95 AV: 19 NL: 4.04E7  
T: FTMS - p ESI Full ms [200.0000-800.0000]

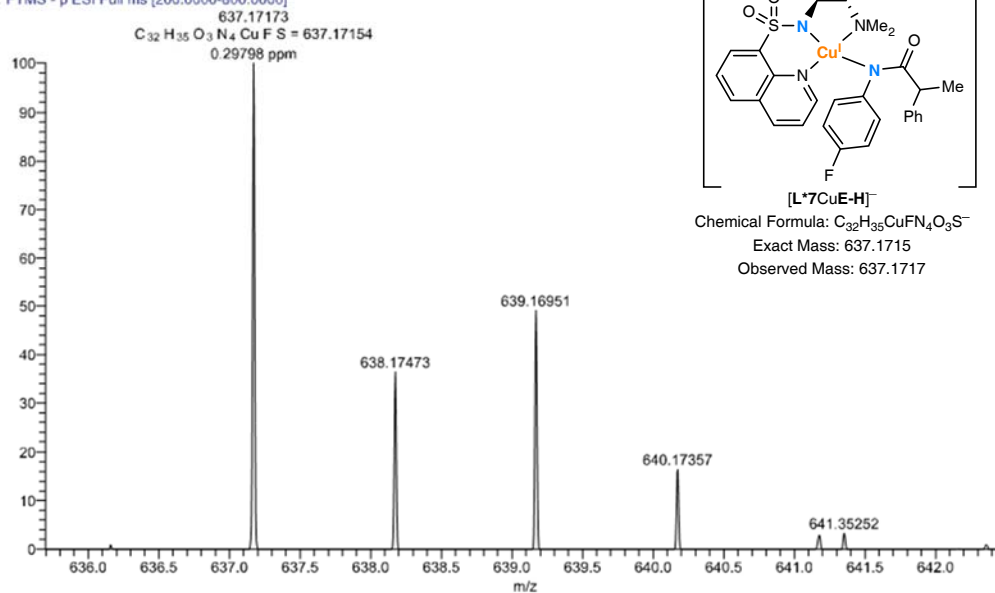

## Theoretical spectrum of [C<sub>32</sub>H<sub>35</sub>CuFN<sub>4</sub>O<sub>3</sub>S]<sup>-</sup>

C32H35CuFN4O3S: C32 H35 Cu1 F1 N4 O3 S1 pa Chrg -1

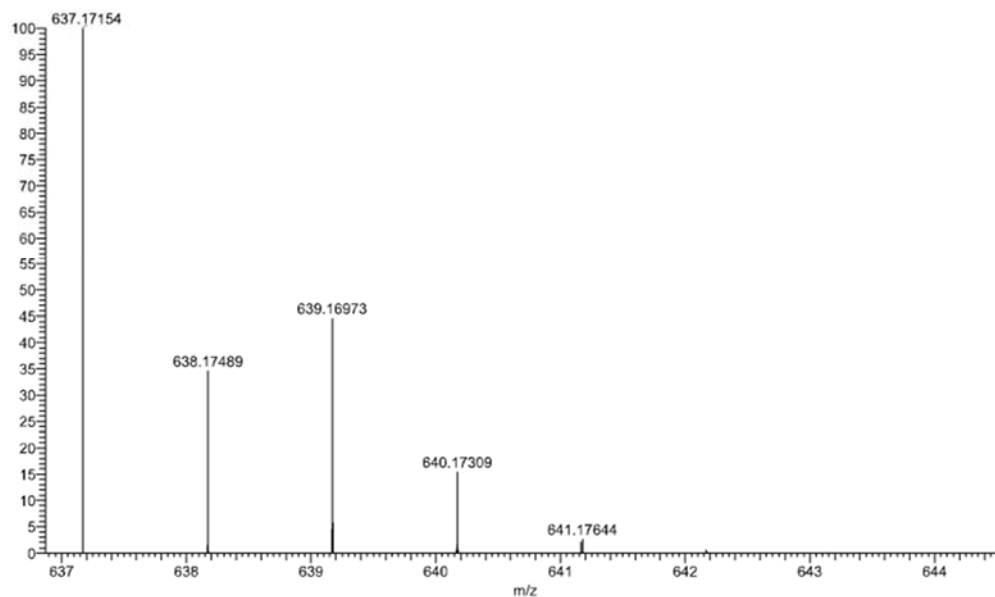

A solution of CuI (10 mol%), **L\*7** (15 mol%), and Cs<sub>2</sub>CO<sub>3</sub> (2.1 equiv.) in MeCN (2.0 mL) was stirred overnight at rt under argon and then, *N*-(4-fluorophenyl)-2-phenylpropanamide **E-H** (0.050 mmol) was added. The resulting mixture was stirred under the same conditions for 1 h before direct high-resolution mass spectroscopic analysis.

## Spectra supporting the formation of [L\*7CuE-H]K

### TOCSY spectrum supporting the formation of [L\*7CuE-H]K

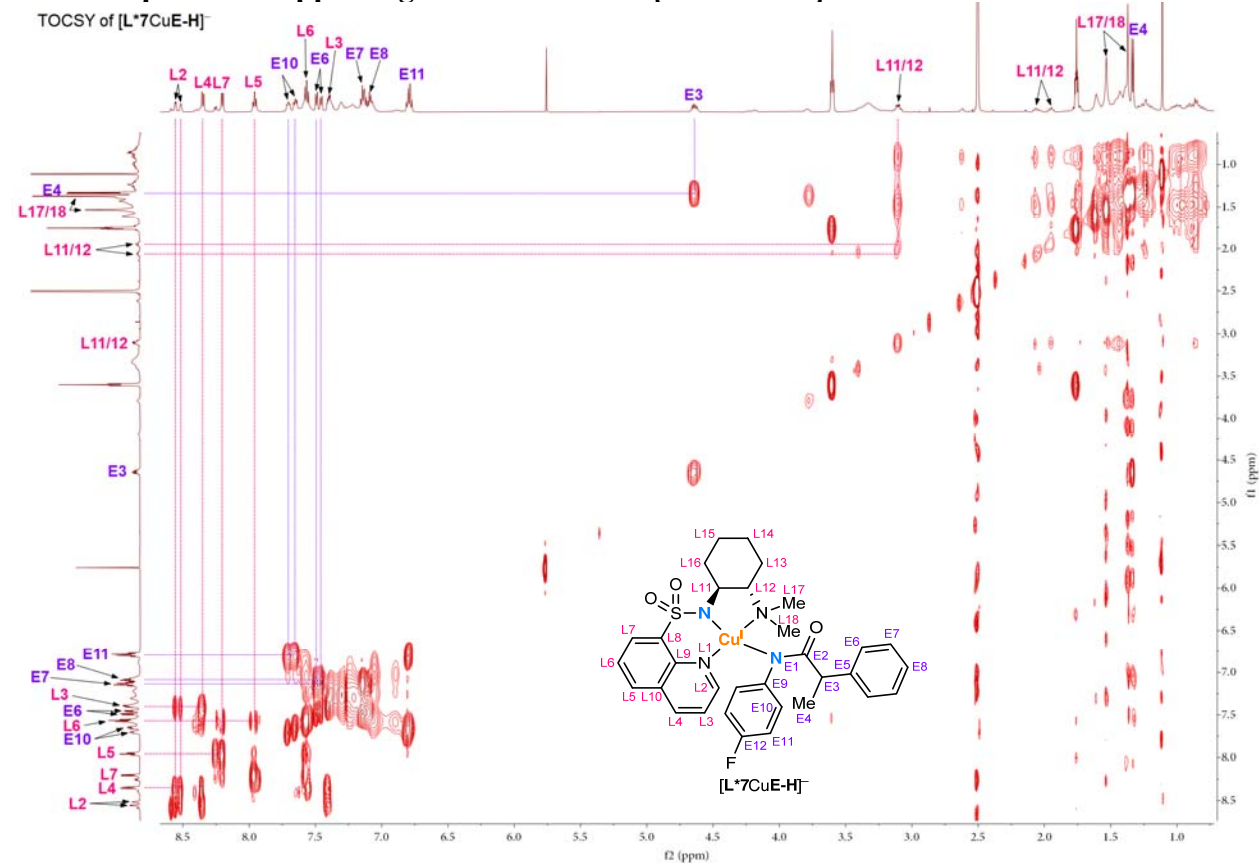

Protocol: A mixture of *N*-(4-fluorophenyl)-2-phenylpropanamide **E-H**, **L\*7** (1.0 equiv.), CuI (1.0 equiv.), and KO<sup>t</sup>Bu (2.0 equiv.) in anhydrous THF was stirred at rt for 1 h under argon. Upon completion, the mixture was concentrated under reduced pressure and the residue was dissolved in DMSO-*d*<sub>6</sub> for further NMR spectroscopic characterization.

## TOCSY local zoom spectrum supporting the formation of $[L^*7CuE-H]K$

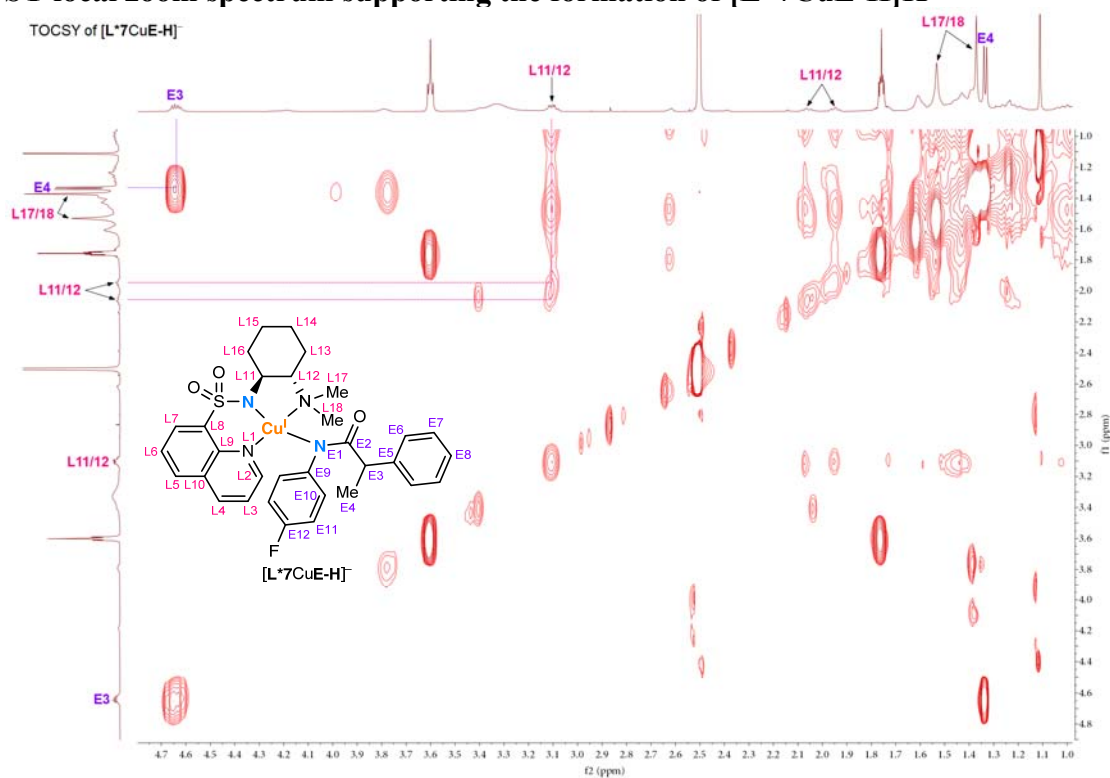

## TOCSY local zoom spectrum supporting the formation of $[L^*7CuE-H]K$

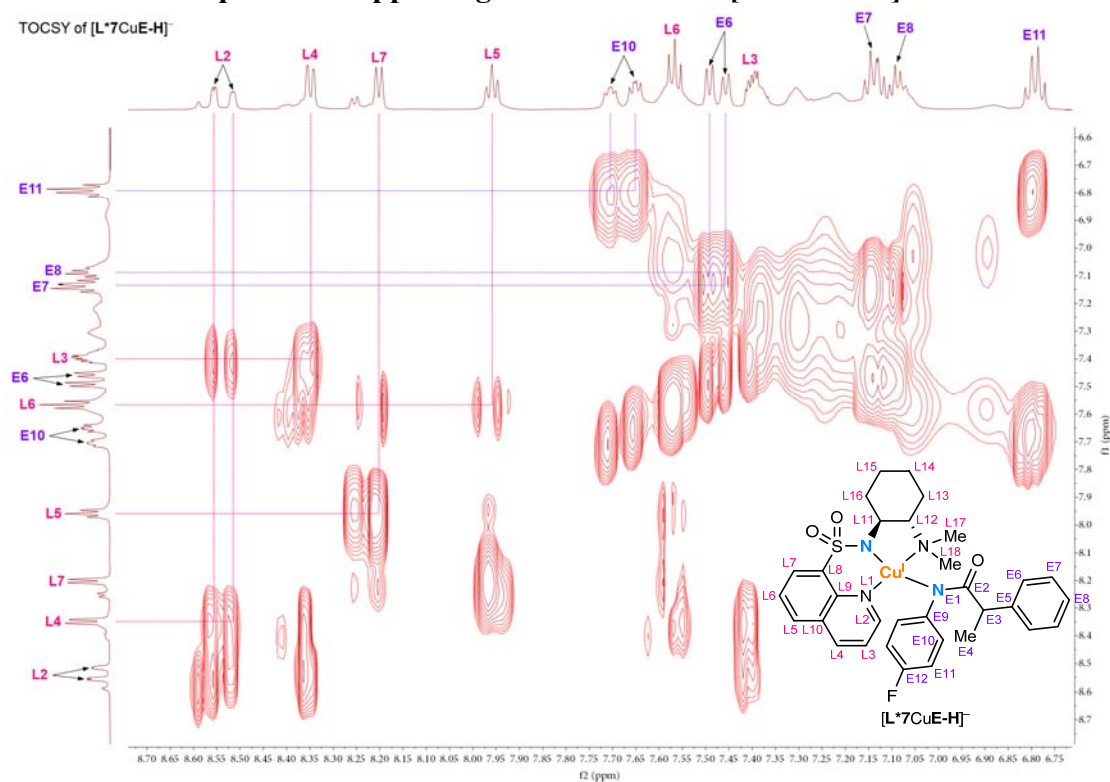

## HSQC spectrum supporting the formation of [L\*7CuE-H]K

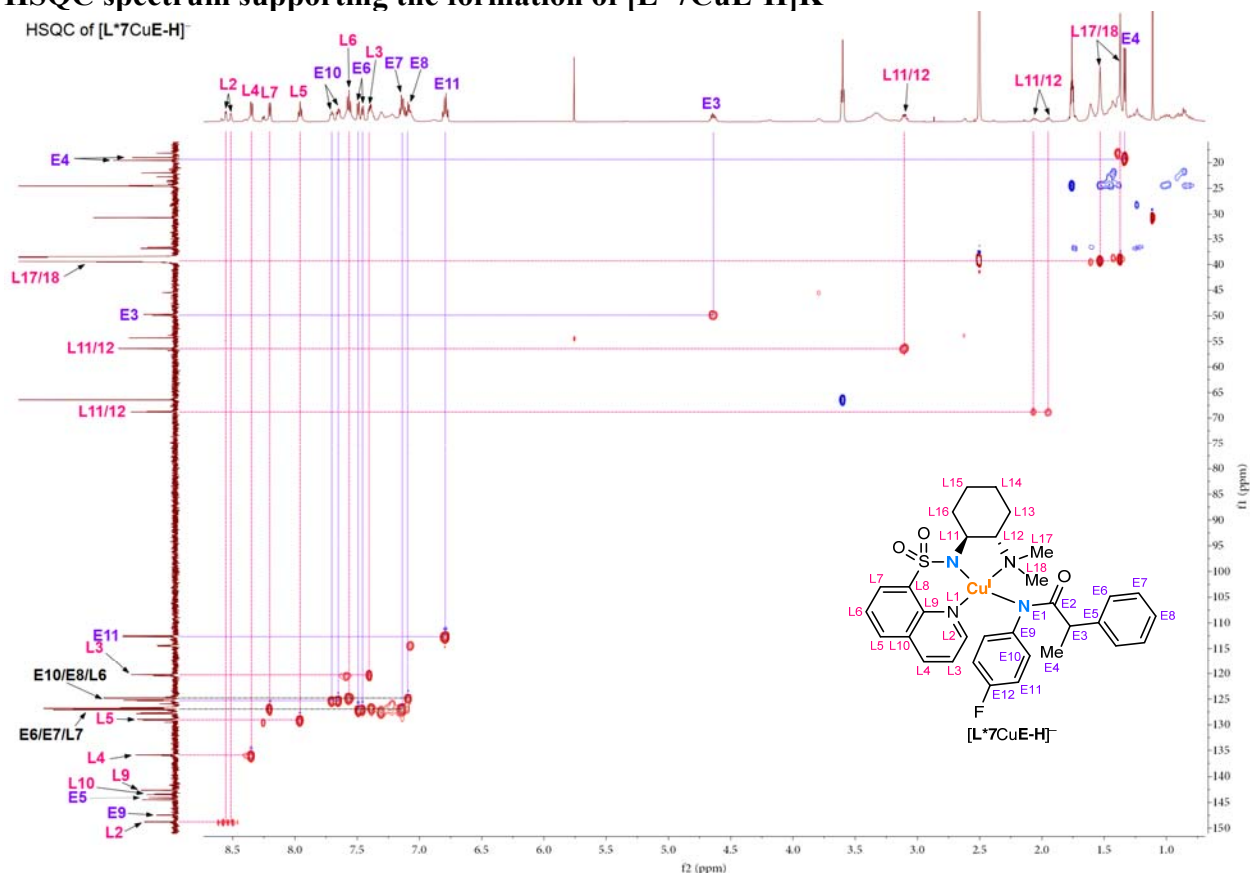

Protocol: A mixture of *N*-(4-fluorophenyl)-2-phenylpropanamide **E-H**, **L\*7** (1.0 equiv.), CuI (1.0 equiv.), and KO<sup>t</sup>Bu (2.0 equiv.) in anhydrous THF was stirred at rt for 1 h under argon. Upon completion, the mixture was concentrated under reduced pressure and the residue was dissolved in DMSO-*d*<sub>6</sub> for further NMR spectroscopic characterization.



## HSQC local zoom spectrum supporting the formation of [L\*7CuE-H]K

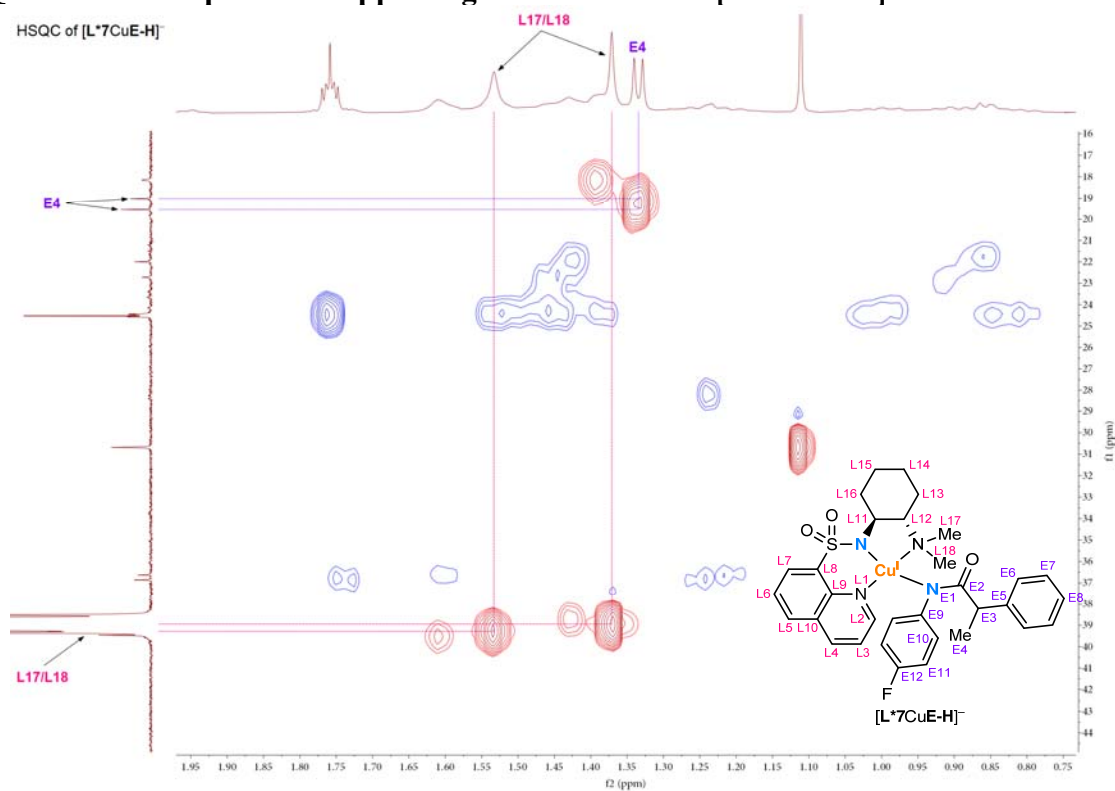

## HSQC local zoom spectrum supporting the formation of [L\*7CuE-H]K

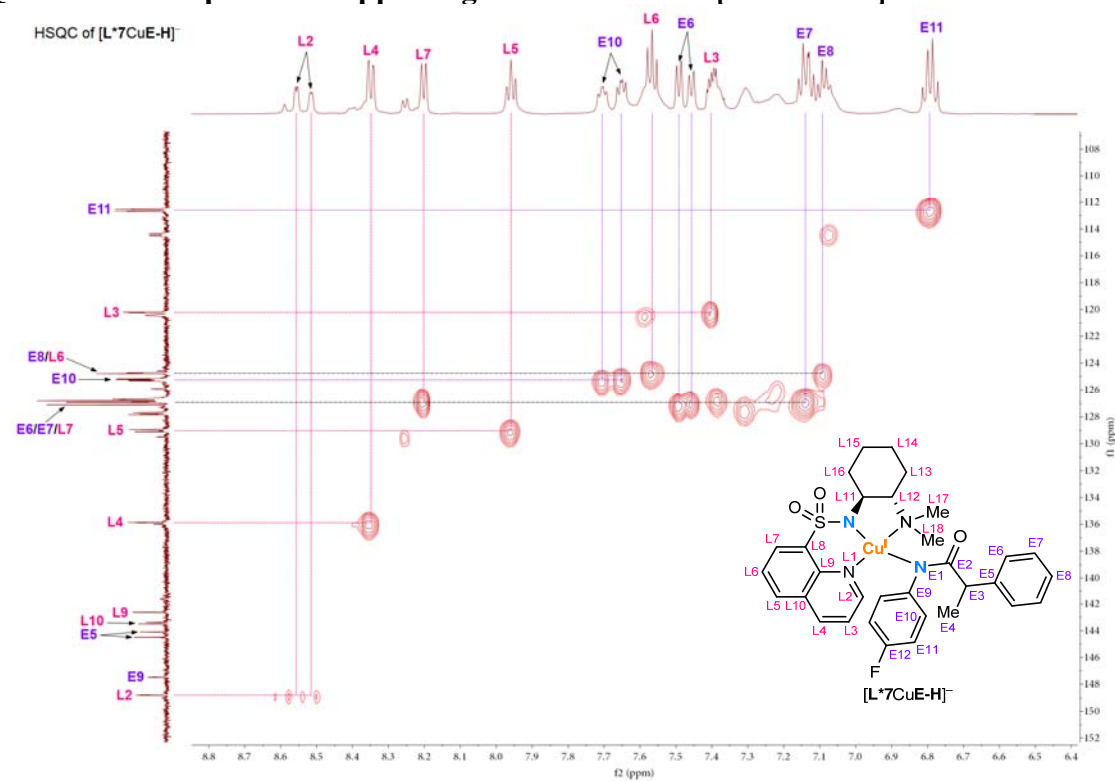

## HSQC local zoom spectrum supporting the formation of [L\*7CuE-H]<sup>-</sup>K

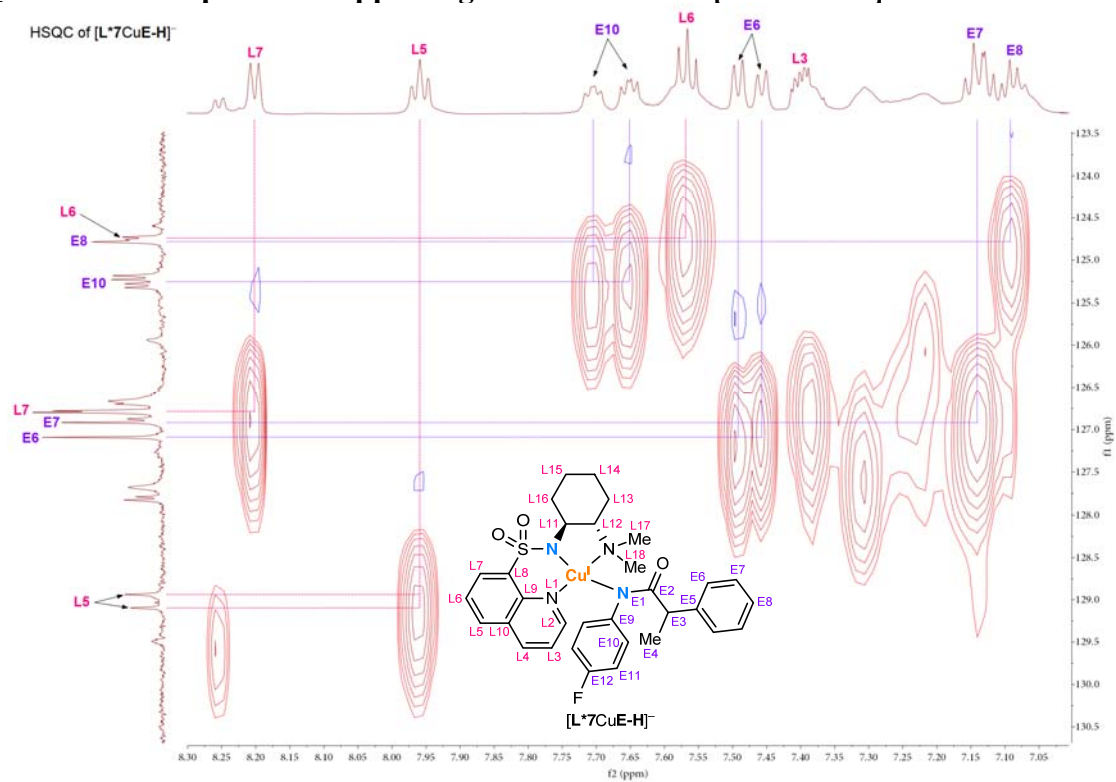

## HMBC spectrum supporting the formation of [L\*7CuE-H]K

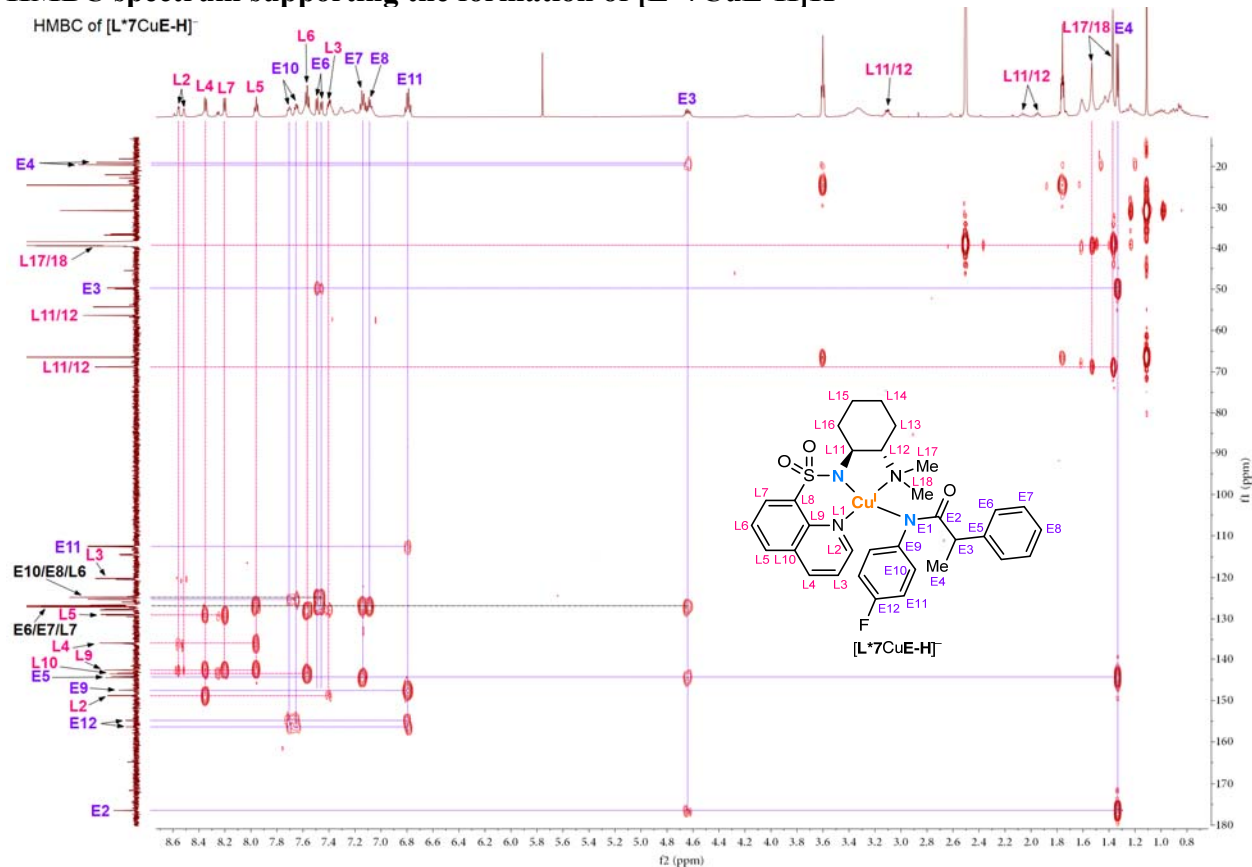

Protocol: A mixture of *N*-(4-fluorophenyl)-2-phenylpropanamide **E-H**, **L\*7** (1.0 equiv.), CuI (1.0 equiv.), and KO<sup>t</sup>Bu (2.0 equiv.) in anhydrous THF was stirred at rt for 1 h under argon. Upon completion, the mixture was concentrated under reduced pressure and the residue was dissolved in DMSO-*d*<sub>6</sub> for further NMR spectroscopic characterization.

## HMBC local zoom spectrum supporting the formation of [L\*7CuE-H]K

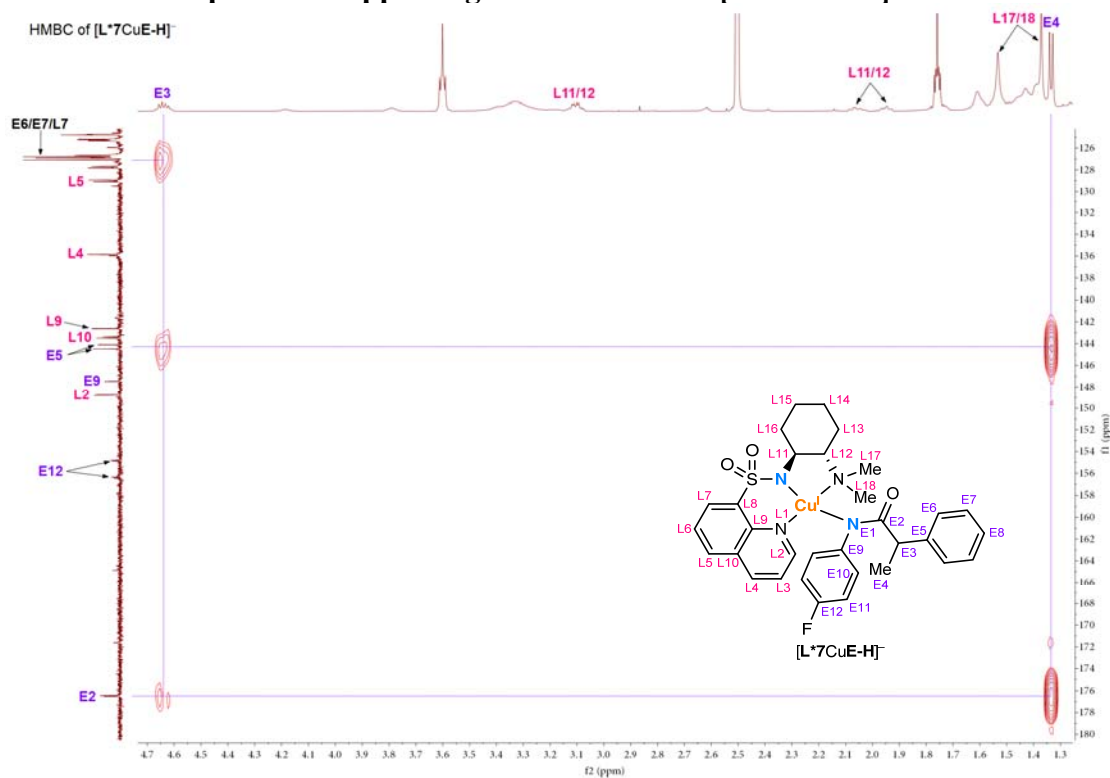

## HMBC local zoom spectrum supporting the formation of [L\*7CuE-H]K

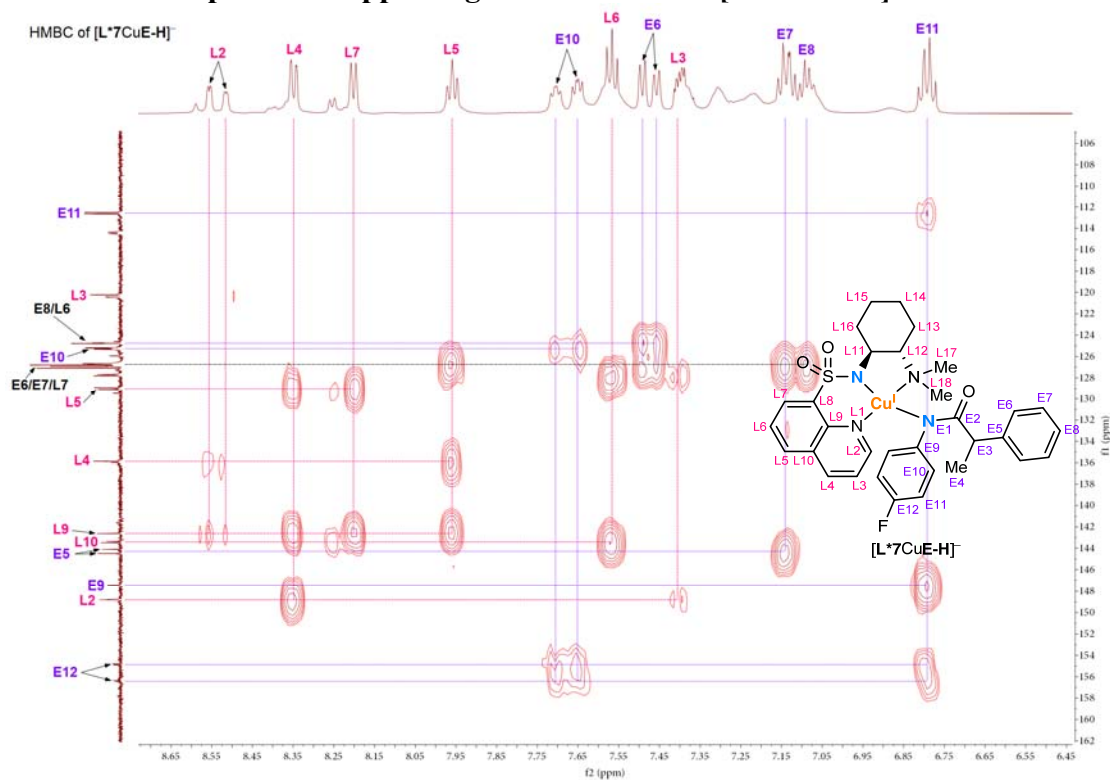

## HMBC local zoom spectrum supporting the formation of [L\*7CuE-H]K

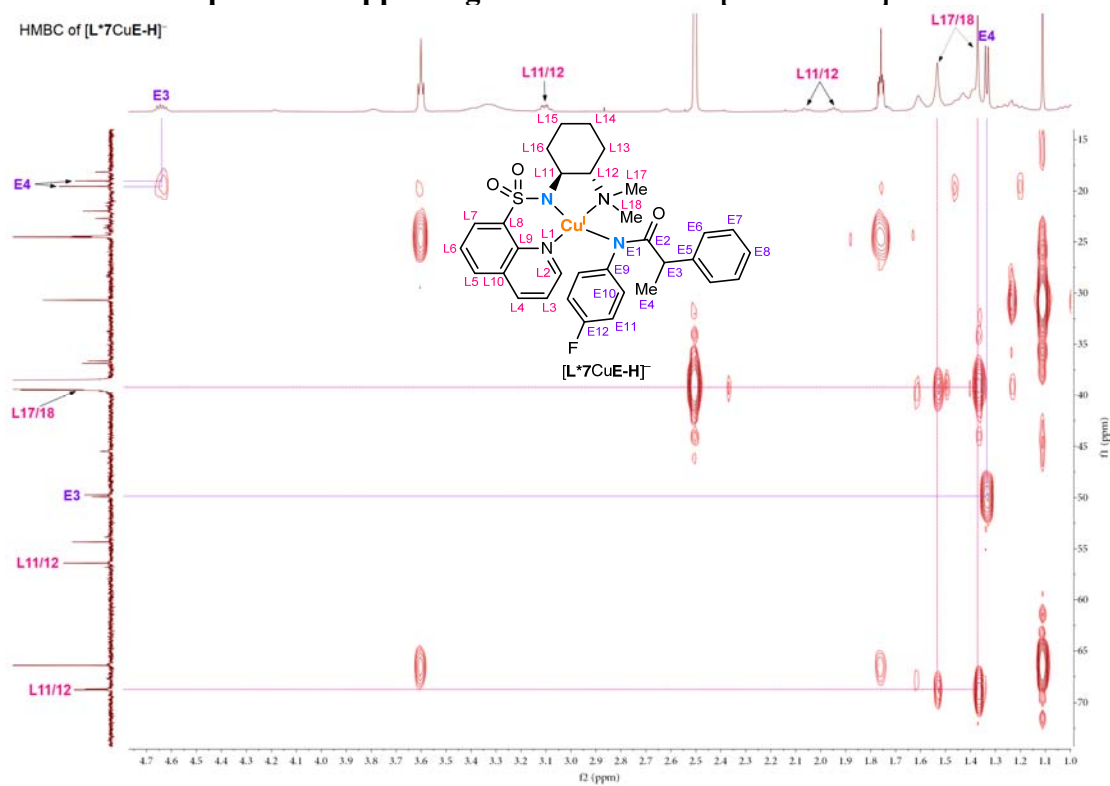

## NOESY spectrum supporting the formation of [L\*7CuE-H]K

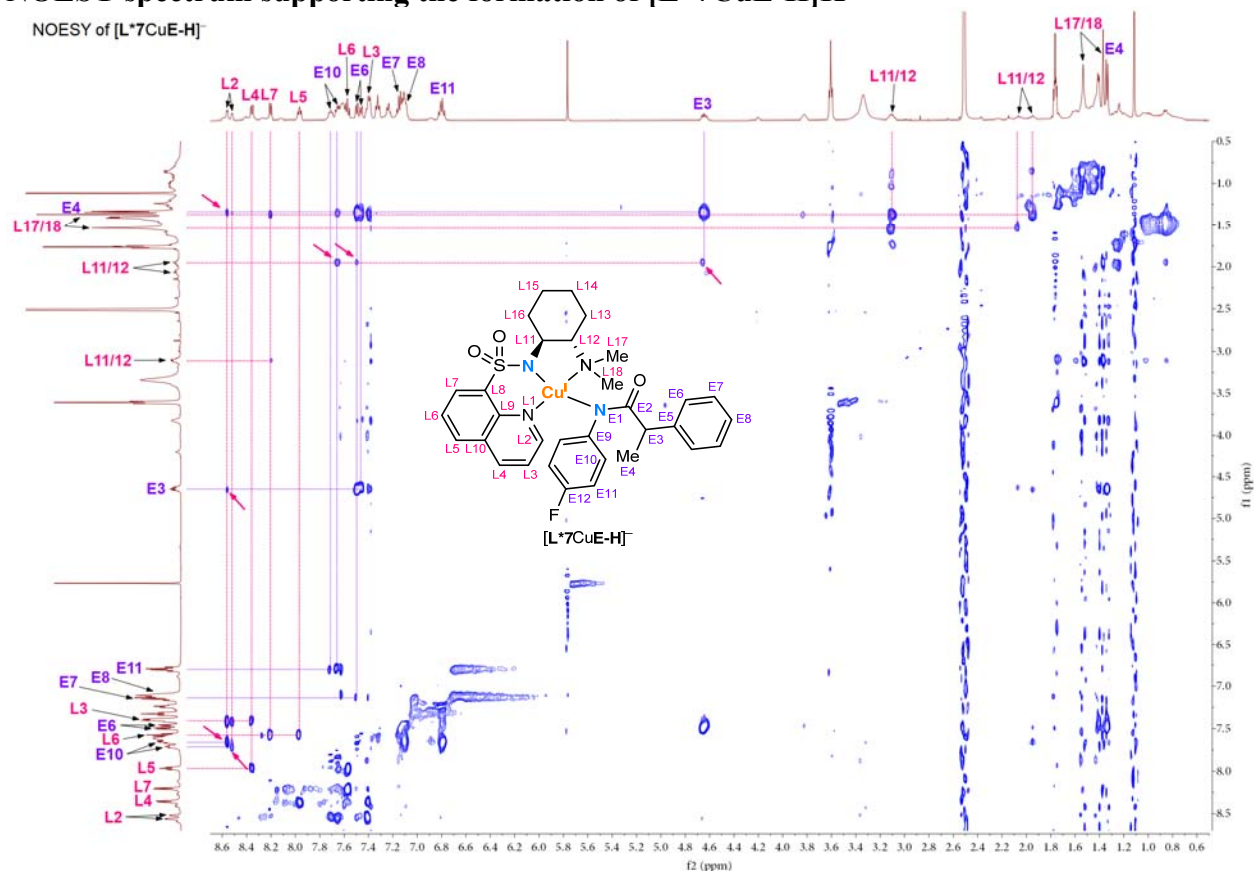

A series of cross-peaks (indicated by pink arrows) corresponding to hydrogen atoms of **L\*7** and **E-H**, respectively, were identified in this spectrum, which indicated the coexistence of these two fragments within one complex molecule.

Protocol: A mixture of *N*-(4-fluorophenyl)-2-phenylpropanamide **E-H**, **L\*7** (1.0 equiv.), CuI (1.0 equiv.), and KO<sup>t</sup>Bu (2.0 equiv.) in anhydrous THF was stirred at rt for 1 h under argon. Upon completion, the mixture was concentrated under reduced pressure and the residue was dissolved in DMSO-*d*<sub>6</sub> for further NMR spectroscopic characterization.

## NOESY local zoom spectrum supporting the formation of $[L^*7CuE-H]K$

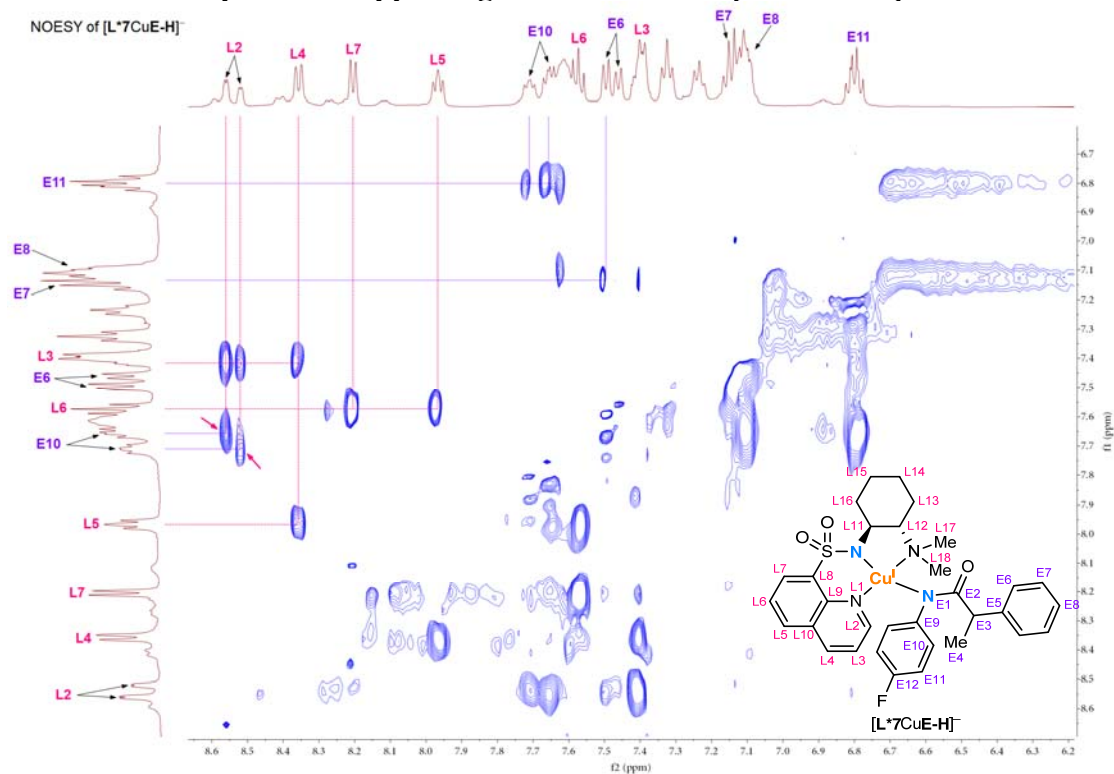

## NOESY local zoom spectrum supporting the formation of $[L^*7CuE-H]K$

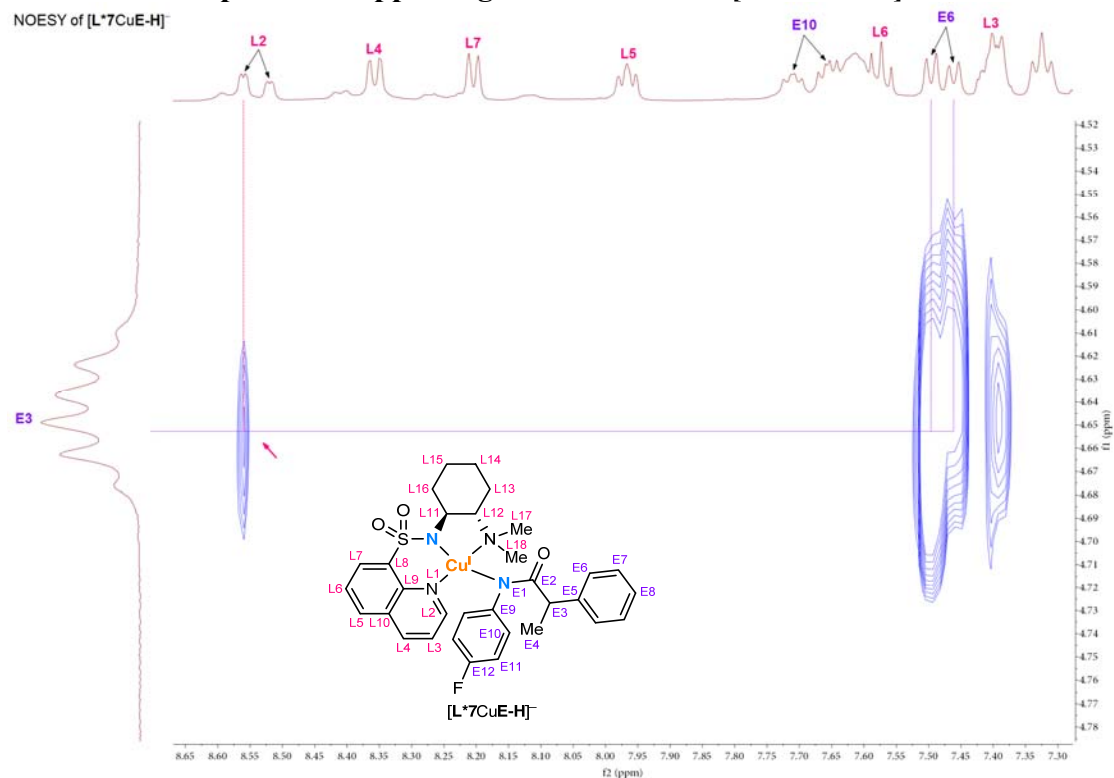



## NOESY local zoom spectrum supporting the formation of [L\*7CuE-H]K

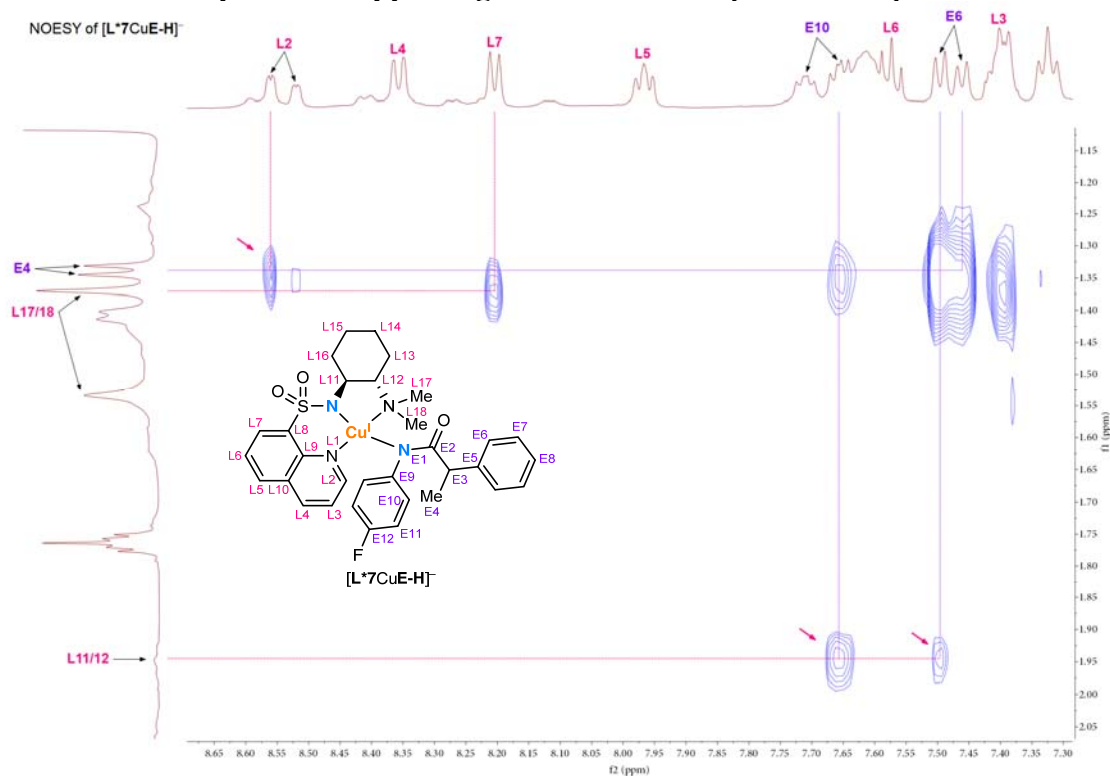

## NOESY local zoom spectrum supporting the formation of [L\*7CuE-H]K

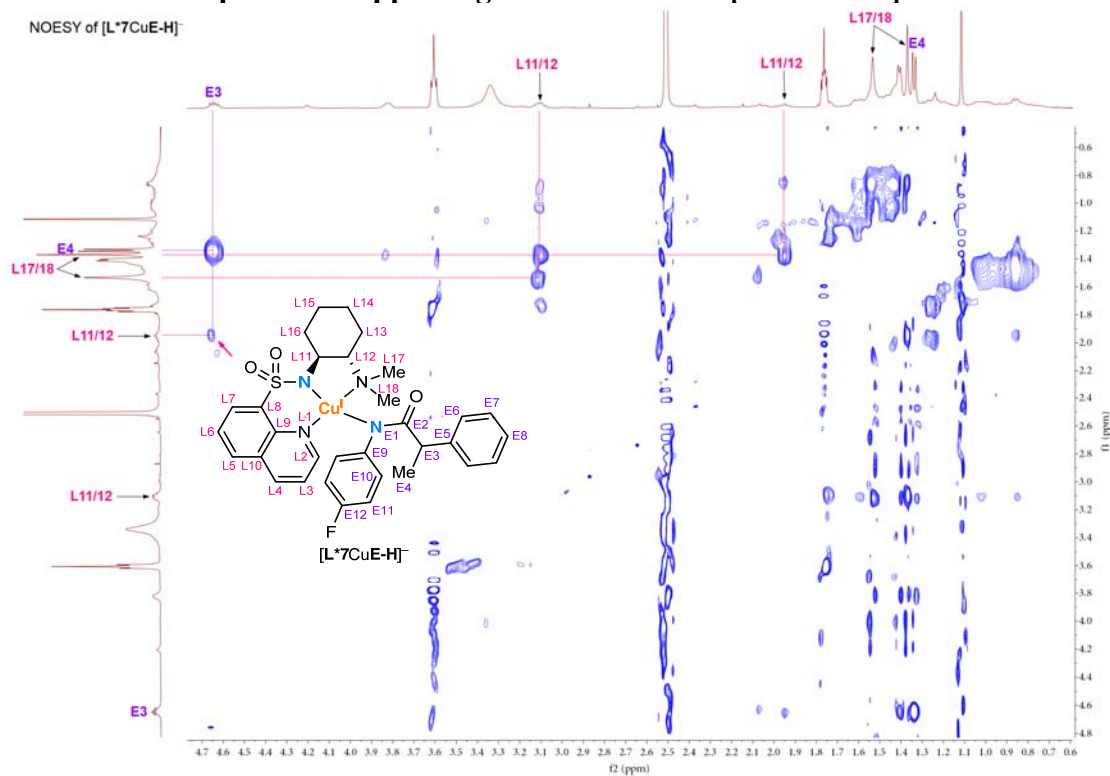



**$^{19}\text{F}$  NMR spectra supporting the formation of  $[\text{L}^*\text{7CuE-H}]\text{K}$**

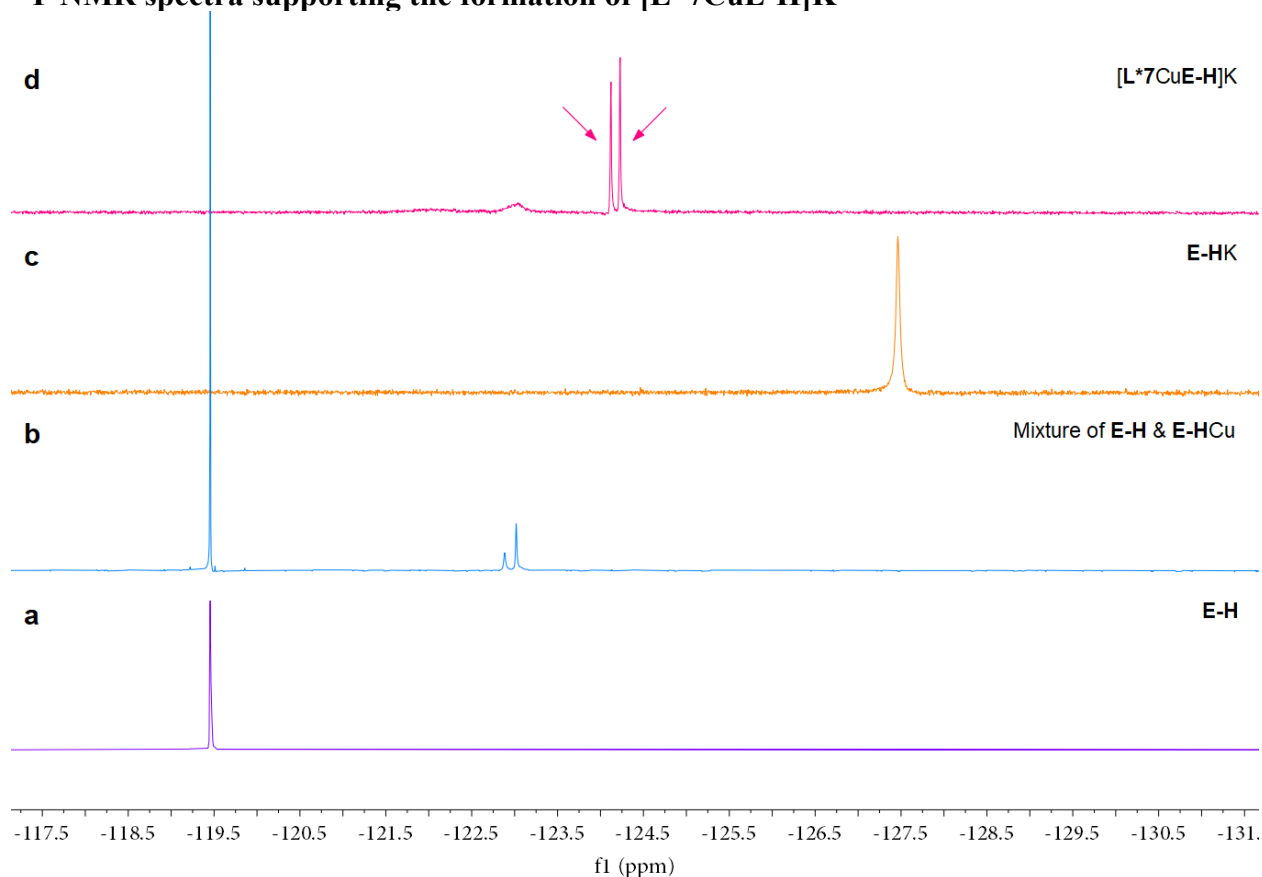

The two peaks (indicated by pink arrows) corresponding to the proposed  $[\text{L}^*\text{7CuE-H}]\text{K}$  appeared downfield relative to that of **E-HK** and upfield relative to that of **E-H** and **E-HCu**, respectively, which were consistent with the corresponding electron densities of the phenyl rings attached to the amide N. **a**,  $^{19}\text{F}$  NMR spectrum of **E-H** in  $\text{DMSO-}d_6$ . **b**,  $^{19}\text{F}$  NMR spectrum of the crude reaction mixture in  $\text{DMSO-}d_6$ , which was prepared by stirring **E-H**, CuI (1.0 equiv.), and KO<sup>t</sup>Bu (1.0 equiv.) in anhydrous THF at rt under argon for 1 h. **c**,  $^{19}\text{F}$  NMR spectrum of **E-HK** in  $\text{DMSO-}d_6$ , which was prepared by stirring **E-H** and KO<sup>t</sup>Bu (1.0 equiv.) in anhydrous THF at rt under argon for 2 h. **d**,  $^{19}\text{F}$  NMR spectrum of  $[\text{L}^*\text{7CuE-H}]\text{K}$  in  $\text{DMSO-}d_6$ , which was prepared by stirring **E-H**, **L\*7** (1.0 equiv.), CuI (1.0 equiv.), and KO<sup>t</sup>Bu (2.0 equiv.) in anhydrous THF at rt under argon for 1 h.

# <sup>1</sup>H NMR spectra supporting the formation of [L\*7CuE-H]K

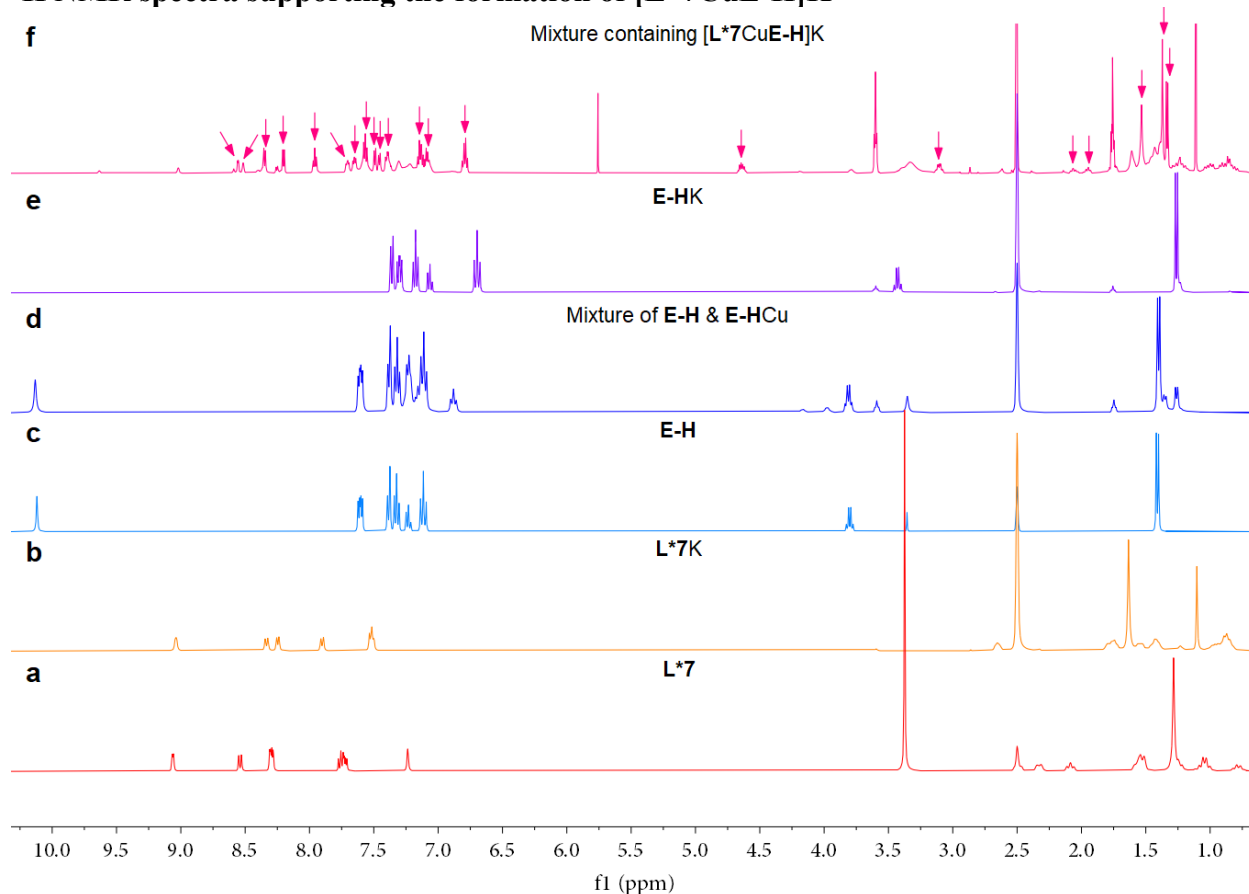

The two sets of peaks (indicated by pink arrows) corresponding to the proposed [L\*7CuE-H]K were identified by comparing the <sup>1</sup>H NMR spectrum of the mixture with that of others. **a**, <sup>1</sup>H NMR spectrum of L\*7 in DMSO-*d*<sub>6</sub>. **b**, <sup>1</sup>H NMR spectrum of L\*7K in DMSO-*d*<sub>6</sub>, which was prepared by stirring L\*7 and KO<sup>t</sup>Bu (1.0 equiv.) in anhydrous THF at rt under argon for 1 h. **c**, <sup>1</sup>H NMR spectrum of E-H in DMSO-*d*<sub>6</sub>. **d**, <sup>1</sup>H NMR spectrum of the crude reaction mixture in DMSO-*d*<sub>6</sub>, which was prepared by stirring E-H, CuI (1.0 equiv.), and KO<sup>t</sup>Bu (1.0 equiv.) in anhydrous THF at rt under argon for 1 h. **e**, <sup>1</sup>H NMR spectrum of E-HK in DMSO-*d*<sub>6</sub>, which was prepared by stirring E-H and KO<sup>t</sup>Bu (1.0 equiv.) in anhydrous THF at rt under argon for 2 h. **f**, <sup>1</sup>H NMR spectrum of [L\*7CuE-H]K in DMSO-*d*<sub>6</sub>, which was prepared by stirring E-H, L\*7 (1.0 equiv.), CuI (1.0 equiv.), and KO<sup>t</sup>Bu (2.0 equiv.) in anhydrous THF at rt under argon for 1 h.

**$^1\text{H}$  NMR local zoom spectra supporting the formation of  $[\text{L}^*7\text{CuE-H}]\text{K}$**

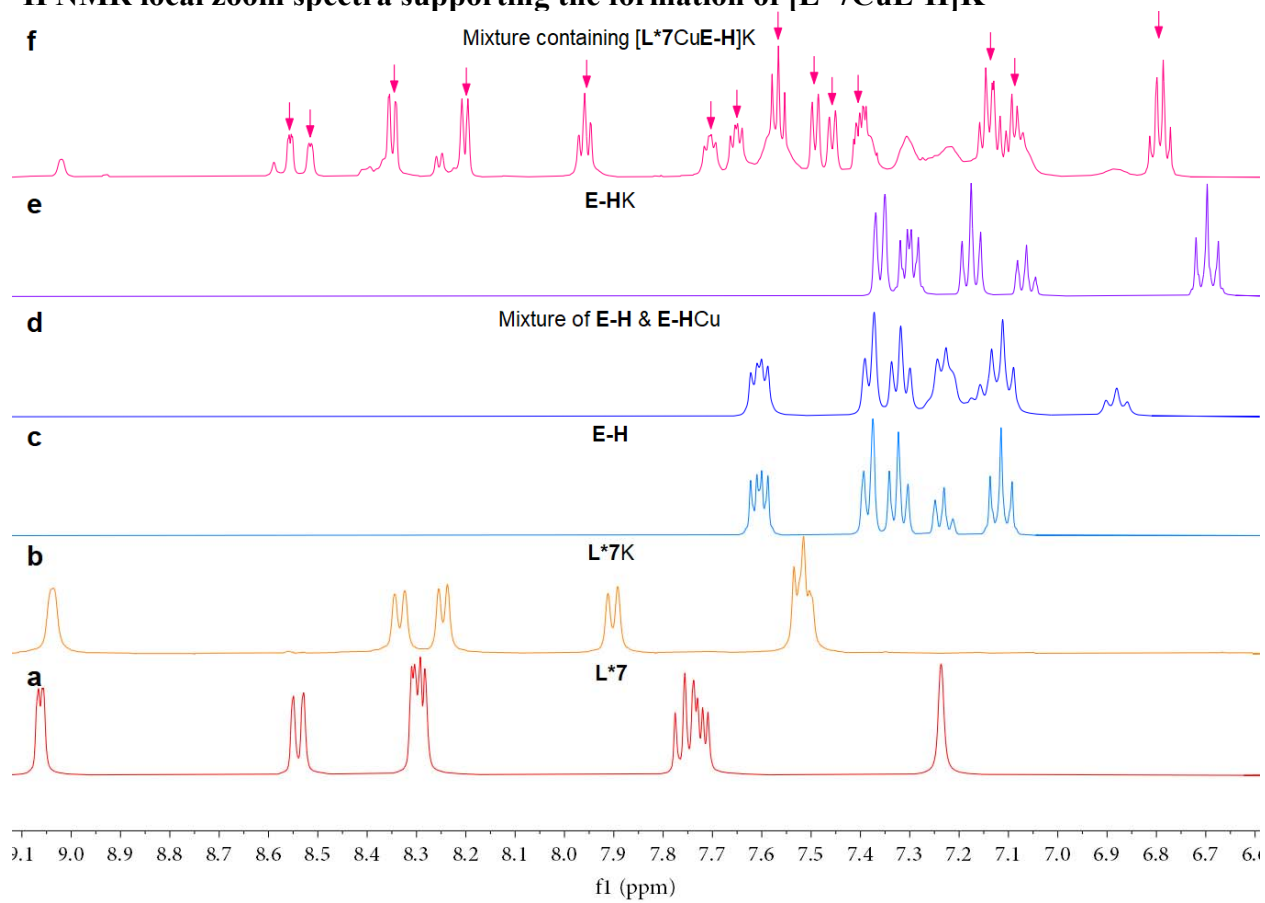

## Deprotometalation of model amide in presence of CuI and Cs<sub>2</sub>CO<sub>3</sub>

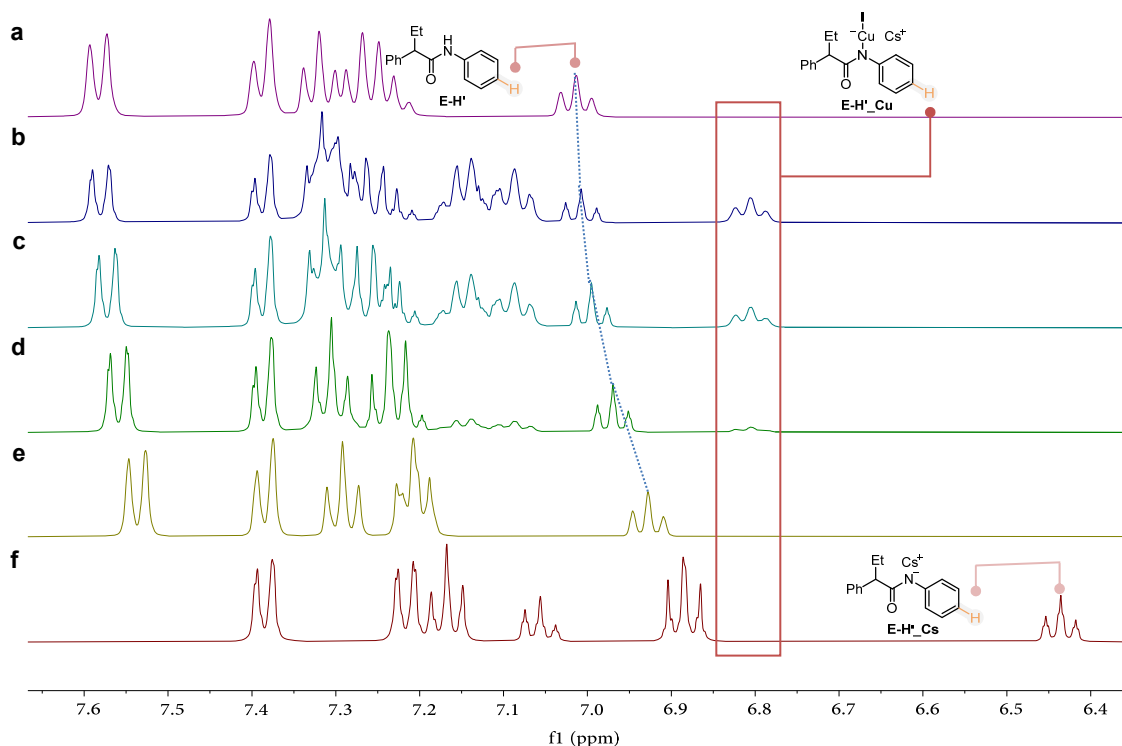

**a**, <sup>1</sup>H-NMR spectrum of **E-H'** (25 mM) in DMSO-*d*<sub>6</sub>. **b**, <sup>1</sup>H-NMR spectrum of **E-H'** (25 mM), CuI (1.0 equiv.), and Cs<sub>2</sub>CO<sub>3</sub> (2.0 equiv.) in DMSO-*d*<sub>6</sub>. **c**, <sup>1</sup>H-NMR spectrum of **E-H'** (25 mM), CuI (0.50 equiv.), and Cs<sub>2</sub>CO<sub>3</sub> (2.0 equiv.) in DMSO-*d*<sub>6</sub>. **d**, <sup>1</sup>H-NMR spectrum of **E-H'** (25 mM), CuI (0.25 equiv.), and Cs<sub>2</sub>CO<sub>3</sub> (2.0 equiv.) in DMSO-*d*<sub>6</sub>. **e**, <sup>1</sup>H-NMR spectrum of **E-H'** (25 mM) and Cs<sub>2</sub>CO<sub>3</sub> (2.0 equiv.) in DMSO-*d*<sub>6</sub>. **f**, <sup>1</sup>H-NMR spectrum of **E-H'\_Cs** (25 mM) in DMSO-*d*<sub>6</sub>. Procedure for panels **b–d**: A mixture of **E-H'** (6.0 mg, 0.025 mmol), CuI (0.25–1.0 equiv.), and Cs<sub>2</sub>CO<sub>3</sub> (2.0 equiv.) in DMSO-*d*<sub>6</sub> (1.0 mL) was stirred at rt for 2 h under argon atmosphere. Upon completion, the mixture was filtered through a 0.22 μm filter and the filtrate was transferred into an NMR tube in a glove box for <sup>1</sup>H NMR spectroscopic analysis.

## Computational study

### Computational Details

All density functional theory (DFT) calculations were performed using Gaussian 16 program<sup>8</sup> with default parameters. Geometry optimizations were conducted with B3LYP functional,<sup>9</sup> employing the D3 version of Grimme's dispersion corrections<sup>10</sup> with Becke-Johnson damping<sup>11</sup>. LANL2DZ basis set<sup>12</sup> was used for copper and 6-31G(d) basis set was used for all other atoms. (5d,7f) keyword in Gaussian 16 software is used. Single-point energies and solvent effects at 1,4-dioxane were evaluated with B3LYP functional and D3 version of Grimme's dispersion corrections with Becke-Johnson damping. SDD basis set<sup>13</sup> was used for copper and 6-311+G(d,p) basis set was used for all other atoms. The solvation energies were calculated with a self-consistent reaction field (SCRF) using the SMD implicit solvent model<sup>14</sup>. Frequency analysis was also performed at the same level of theory as geometry optimization to confirm whether optimized stationary points were either local minimum or transition state, as well as to evaluate zero-point vibrational energies and thermal corrections for enthalpies and free energies at 298.15 K.

To correct the Gibbs free energies under 1 atm to the standard state in solution (1 mol/L), a correction of  $RT\ln(c_s/c_g)$  is added to energies of all species.  $c_s$  stands for the standard molar concentration in solution (1 mol/L),  $c_g$  stands for the standard molar concentration in gas phase (about 0.040876 mol/L), and  $R$  is the gas constant. For calculated intermediates at the standard state of 1 mol/L at 298.15 K, the correction value equaling to 1.89 kcal/mol was used.

The 3D diagrams of optimized structures shown in the main text and below here in supplementary information for computations were generated with CYLview software<sup>15</sup>.

### Computational study on the complexation of L\*4Cu(I) with the deprotonated amide substrate

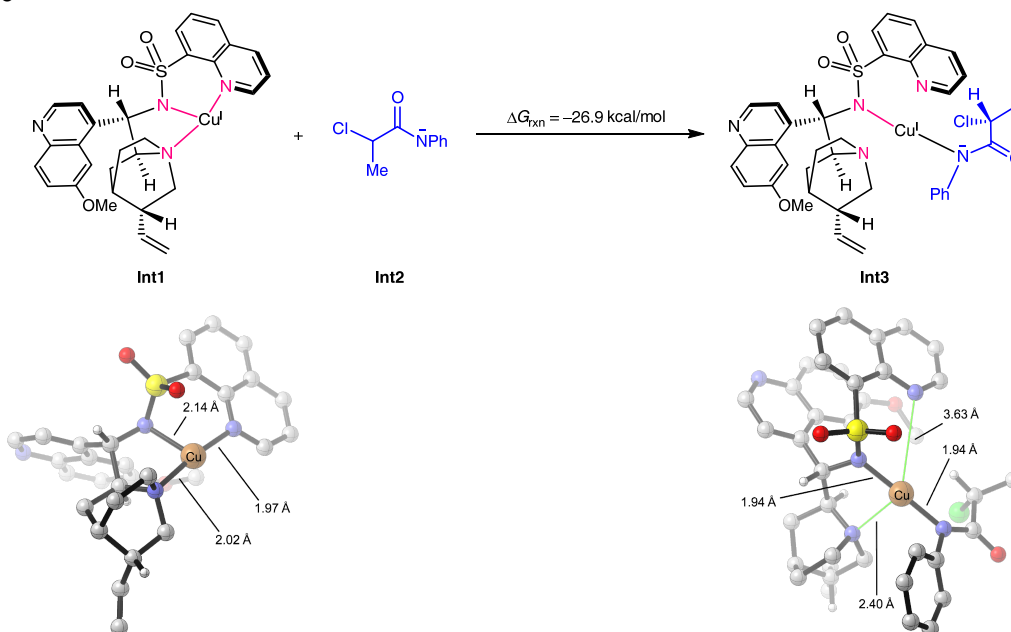

Computational study of complexation of LCu(I) and deprotonated amide substrate. Trivial hydrogen atoms are omitted for clarity in 3D diagrams. The complexation process of LCu(I) species **Int1** and deprotonated amide species **Int2** has an exergonic free energy change of 26.9 kcal/mol.

## Table of Energies

**Supplementary Fig. 17** Zero-point correction (*ZPE*), thermal correction to enthalpy (*TCH*), thermal correction to Gibbs free energy (*TCG*), energies (*E*), enthalpies (*H*), and Gibbs free energies (*G*) (in Hartree) of the structures calculated at B3LYP-D3(BJ)/6-311+G(d,p)-SDD-SMD(1,4-Dioxane)//B3LYP-D3(BJ)/6-31G(d)-LANL2DZ level of theory.

| Structure   | <i>ZPE</i> | <i>TCH</i> | <i>TCG</i> | <i>E</i>     | <i>H</i>     | <i>G</i>     | Imaginary Frequency |
|-------------|------------|------------|------------|--------------|--------------|--------------|---------------------|
| <b>Int1</b> | 0.541692   | 0.574744   | 0.477100   | -2163.356067 | -2162.781323 | -2162.878967 |                     |
| <b>Int2</b> | 0.161531   | 0.173485   | 0.122866   | -938.868764  | -938.695279  | -938.745898  |                     |
| <b>Int3</b> | 0.704427   | 0.750284   | 0.622882   | -3102.287592 | -3101.537308 | -3101.664710 |                     |

## Coordinates of Computed Species

### Int1

Charge = 0, Multiplicity = 1

|   |             |             |             |
|---|-------------|-------------|-------------|
| C | 1.06297600  | 0.29645200  | -1.27288000 |
| H | 1.31397700  | -0.05341200 | -2.28365500 |
| C | 1.43475800  | 1.77188100  | -1.20238700 |
| C | 1.09158800  | 2.58641600  | -0.07659600 |
| C | 2.18386700  | 2.35139300  | -2.20408400 |
| C | 0.27083400  | 2.13736600  | 0.99387500  |
| C | 1.60666400  | 3.92075100  | -0.04368900 |
| C | 2.62158700  | 3.69073800  | -2.08273000 |
| H | 2.44594200  | 1.78153900  | -3.09121800 |
| C | -0.01083500 | 2.96987400  | 2.05539300  |
| H | -0.18300000 | 1.16330900  | 0.90978300  |
| C | 1.31062200  | 4.74142800  | 1.08113100  |
| H | 3.21556700  | 4.13605100  | -2.88022700 |
| C | 0.52750900  | 4.28308500  | 2.10951000  |
| H | 1.72040300  | 5.74614900  | 1.08547500  |
| H | 0.28628800  | 4.90587300  | 2.96506900  |
| N | 2.36831900  | 4.45614300  | -1.04056200 |
| N | -0.33785000 | 0.06647700  | -0.93641100 |
| C | 1.97896500  | -0.46466900 | -0.26632900 |
| C | 3.47074800  | -0.44543000 | -0.68185000 |
| N | 1.52193600  | -1.87828000 | -0.02082700 |
| H | 1.86080300  | 0.02670900  | 0.70312600  |
| C | 4.05518600  | -1.85673600 | -0.52532400 |
| H | 4.02198000  | 0.28770500  | -0.08659100 |
| H | 3.57158100  | -0.13204400 | -1.72698700 |
| C | 2.27386000  | -2.40561200 | 1.14753100  |
| C | 1.80510300  | -2.74233000 | -1.20602900 |
| C | 3.81877000  | -2.38896700 | 0.91075800  |
| H | 5.12968900  | -1.84723100 | -0.73351400 |
| C | 3.32531800  | -2.78271100 | -1.51194300 |
| H | 1.91728100  | -3.42184200 | 1.33671500  |
| H | 2.00595100  | -1.79422700 | 2.01425300  |
| H | 1.41416500  | -3.73578100 | -0.97034600 |
| H | 1.21152000  | -2.36599600 | -2.03930800 |
| H | 3.71028400  | -3.80526500 | -1.42471000 |
| H | 3.51685700  | -2.45267500 | -2.53903000 |
| H | 4.19702400  | -3.41795900 | 0.94930600  |

|    |             |             |             |
|----|-------------|-------------|-------------|
| S  | -1.30714600 | -0.46472400 | -2.08589300 |
| O  | -1.19730500 | -1.94256500 | -2.30543100 |
| O  | -1.33347700 | 0.34565300  | -3.32083900 |
| Cu | -0.47405700 | -1.71076600 | 0.24211300  |
| C  | 4.53461500  | -1.58914500 | 1.96233500  |
| C  | 5.52222700  | -2.05336500 | 2.72816900  |
| H  | 4.20098400  | -0.55881900 | 2.09352300  |
| H  | 6.01011900  | -1.43190500 | 3.47371700  |
| H  | 5.88197400  | -3.07624200 | 2.63496300  |
| C  | -2.88564500 | -0.20835200 | -1.22877600 |
| C  | -3.24149600 | -0.79853200 | 0.02570300  |
| C  | -3.78538600 | 0.59719300  | -1.89303800 |
| C  | -4.54200700 | -0.50396100 | 0.55753800  |
| C  | -5.06472700 | 0.87382100  | -1.36326500 |
| H  | -3.47478500 | 1.02272800  | -2.84104400 |
| C  | -2.78094200 | -2.13834200 | 1.88826400  |
| C  | -4.90885000 | -1.06229900 | 1.80520000  |
| H  | -5.74499400 | 1.51566200  | -1.91411300 |
| C  | -4.03309300 | -1.88202000 | 2.47496800  |
| H  | -5.88926400 | -0.83410400 | 2.21451900  |
| H  | -4.28347100 | -2.33312900 | 3.42878500  |
| C  | -5.43590800 | 0.33484200  | -0.15710500 |
| H  | -6.41311300 | 0.53706800  | 0.27229300  |
| N  | -2.38481000 | -1.61987800 | 0.72941400  |
| O  | -0.81754900 | 2.62292700  | 3.10212300  |
| C  | -1.44704600 | 1.35405100  | 3.03884100  |
| H  | -0.71072000 | 0.53818100  | 3.02702000  |
| H  | -2.06168600 | 1.27607600  | 3.93754300  |
| H  | -2.08113100 | 1.26304800  | 2.14724100  |
| H  | -2.07032100 | -2.79193000 | 2.38311200  |

## Int2

Charge = -1, Multiplicity = 1

|   |             |             |             |
|---|-------------|-------------|-------------|
| C | 0.96445900  | 0.28151700  | 0.16367700  |
| O | 0.95337100  | 1.50431000  | -0.10905300 |
| N | -0.00899100 | -0.62463300 | 0.28922400  |
| C | 2.33594600  | -0.34918600 | 0.49356600  |
| H | 2.20231700  | -1.37784200 | 0.82263300  |
| C | 3.12565700  | 0.49750800  | 1.47307100  |
| H | 2.58362700  | 0.52231900  | 2.42801500  |
| H | 4.13180000  | 0.10160300  | 1.64762600  |
| H | 3.18247900  | 1.51873300  | 1.08816400  |
| C | -1.33564100 | -0.27993500 | 0.11236400  |
| C | -2.28218500 | -1.31943500 | 0.30972700  |
| C | -1.86047000 | 0.99351800  | -0.24401400 |
| C | -3.64920400 | -1.11446400 | 0.16687600  |
| H | -1.88845800 | -2.29612300 | 0.58038100  |
| C | -3.23365700 | 1.18691000  | -0.38486900 |
| H | -1.15817200 | 1.80110800  | -0.40035300 |
| C | -4.14613100 | 0.14683500  | -0.18344800 |
| H | -4.33685600 | -1.94443700 | 0.32889800  |
| H | -3.60030300 | 2.17631000  | -0.65963600 |
| H | -5.21573300 | 0.31269300  | -0.29709100 |

|    |            |             |             |
|----|------------|-------------|-------------|
| Cl | 3.35427200 | -0.51388400 | -1.06661600 |
|----|------------|-------------|-------------|

### Int3

Charge = -1, Multiplicity = 1

|    |             |             |             |
|----|-------------|-------------|-------------|
| C  | -0.46104600 | 1.75233900  | -0.58690800 |
| H  | -0.18419900 | 2.49161200  | -1.35018700 |
| C  | -1.89417000 | 2.08942500  | -0.19135400 |
| C  | -2.67392800 | 1.31294500  | 0.72483200  |
| C  | -2.51141500 | 3.16811700  | -0.79132400 |
| C  | -2.18180200 | 0.15977900  | 1.39418000  |
| C  | -4.02747800 | 1.72403500  | 0.95402600  |
| C  | -3.85508200 | 3.48289800  | -0.49662700 |
| H  | -1.97058500 | 3.75476200  | -1.52724900 |
| C  | -2.98533200 | -0.52854900 | 2.28185500  |
| H  | -1.19794800 | -0.20330000 | 1.13915400  |
| C  | -4.83104900 | 0.97101700  | 1.85296700  |
| H  | -4.32773900 | 4.33493600  | -0.98642000 |
| C  | -4.32665000 | -0.12177400 | 2.50736700  |
| H  | -5.85479200 | 1.30070900  | 1.99930300  |
| H  | -4.92629300 | -0.70227500 | 3.20169600  |
| N  | -4.60499500 | 2.79972800  | 0.34537000  |
| N  | -0.31681100 | 0.39949700  | -1.12030300 |
| C  | 0.51702000  | 1.93242600  | 0.59528400  |
| C  | 0.56660900  | 3.39254900  | 1.12128200  |
| N  | 1.87009300  | 1.46776000  | 0.23242200  |
| H  | 0.19897200  | 1.27277100  | 1.40609600  |
| C  | 2.04367200  | 3.77202400  | 1.33631500  |
| H  | -0.01448000 | 3.49282800  | 2.04386800  |
| H  | 0.12027300  | 4.08308700  | 0.39462000  |
| C  | 2.67772600  | 1.34528400  | 1.44898100  |
| C  | 2.53462100  | 2.39338200  | -0.69993500 |
| C  | 2.76173900  | 2.71180600  | 2.21867700  |
| H  | 2.11829800  | 4.75346100  | 1.81817100  |
| C  | 2.73030900  | 3.79138800  | -0.04171000 |
| H  | 3.67142500  | 0.99515600  | 1.15498500  |
| H  | 2.23732200  | 0.56294800  | 2.07531500  |
| H  | 3.48767900  | 1.94150600  | -0.98295900 |
| H  | 1.93248800  | 2.45199100  | -1.60974200 |
| H  | 3.79647800  | 4.02398500  | 0.07337800  |
| H  | 2.29155400  | 4.58260300  | -0.66241000 |
| H  | 3.81261100  | 3.01630200  | 2.31019800  |
| S  | -1.01656100 | 0.13109000  | -2.55198200 |
| O  | -0.36582600 | -1.01333100 | -3.20977400 |
| O  | -1.17441600 | 1.38573800  | -3.33116800 |
| Cu | 1.28286600  | -0.63120400 | -0.76804300 |
| C  | 2.18298700  | 2.61537200  | 3.59998600  |
| C  | 2.81453400  | 2.95952500  | 4.72349400  |
| H  | 1.16957900  | 2.21650500  | 3.66732000  |
| H  | 2.34763800  | 2.85847700  | 5.69989900  |
| H  | 3.83099600  | 3.34884100  | 4.70679300  |
| C  | -2.70859900 | -0.35903000 | -2.13342000 |
| C  | -2.96456200 | -1.47978700 | -1.28732900 |
| C  | -3.73918300 | 0.46551800  | -2.52806500 |



|    |             |             |             |
|----|-------------|-------------|-------------|
| C  | -4.30639300 | -1.68787300 | -0.82922500 |
| C  | -5.06218600 | 0.23989400  | -2.08519300 |
| H  | -3.50117300 | 1.31734500  | -3.15339700 |
| C  | -2.20861600 | -3.30316700 | -0.10713100 |
| C  | -4.53710200 | -2.76939700 | 0.05588500  |
| H  | -5.84957000 | 0.92351300  | -2.38819700 |
| C  | -3.49193300 | -3.58169300 | 0.42261300  |
| H  | -5.54150400 | -2.93366800 | 0.43897600  |
| H  | -3.62906200 | -4.41194700 | 1.10829600  |
| C  | -5.33998600 | -0.80851800 | -1.24085900 |
| H  | -6.34650800 | -0.97098700 | -0.86338400 |
| N  | -1.94226500 | -2.29846200 | -0.91417000 |
| O  | -2.59325400 | -1.62219800 | 2.99277800  |
| C  | -1.21182700 | -1.95903500 | 2.94345600  |
| H  | -0.58888900 | -1.11965200 | 3.27138700  |
| H  | -1.07607800 | -2.80210200 | 3.62161800  |
| H  | -0.90531300 | -2.25003900 | 1.93539000  |
| H  | -1.36483300 | -3.93984400 | 0.15926400  |
| C  | 3.19813900  | -2.63956500 | 0.26287100  |
| O  | 4.27864900  | -3.20179100 | 0.49447800  |
| N  | 2.93618200  | -1.62949000 | -0.58934700 |
| C  | 1.85892600  | -4.65123700 | 1.03383200  |
| H  | 2.79839500  | -5.05709000 | 1.41601700  |
| H  | 1.02152600  | -4.99543400 | 1.64904300  |
| H  | 1.71712900  | -5.01433000 | 0.00786100  |
| C  | 3.98226100  | -0.98457900 | -1.27331500 |
| C  | 3.69377200  | -0.41943600 | -2.53243600 |
| C  | 5.26514000  | -0.77266900 | -0.72820800 |
| C  | 4.63581500  | 0.35476000  | -3.20525400 |
| H  | 2.70806800  | -0.58678200 | -2.96066600 |
| C  | 6.19840900  | 0.00992500  | -1.40711300 |
| H  | 5.50975400  | -1.22871400 | 0.22205300  |
| C  | 5.89537800  | 0.58466400  | -2.64453700 |
| H  | 4.37933200  | 0.78488400  | -4.17075900 |
| H  | 7.17722100  | 0.17321300  | -0.95999800 |
| H  | 6.62997400  | 1.19376300  | -3.16562400 |
| C  | 1.94135700  | -3.14000500 | 0.99700000  |
| H  | 1.03994600  | -2.68130500 | 0.58635300  |
| Cl | 2.02982600  | -2.49808300 | 2.73769400  |

## 9. References

1. Line, N. J., Witherspoon, B. P., Hancock, E. N. & Brown, M. K. Synthesis of *ent*-[3]-ladderanol: Development and application of intramolecular chirality transfer [2+2] cycloadditions of allenic ketones and alkenes. *J. Am. Chem. Soc.* **139**, 14392–14395 (2017).
2. Wang, P.-F., Yu, J., Guo, K.-X., Jiang, S.-P., Chen, J.-J., Gu, Q.-S., Liu, J.-R., Hong, X., Li, Z.-L. & Liu, X.-Y. Design of hemilabile N,N,N-Ligands in copper-catalyzed enantioconvergent radical cross-coupling of benzyl/propargyl halides with alkenylboronate esters. *J. Am. Chem. Soc.* **144**, 6442–6452 (2022).
3. Zhang, Y.-F., Dong, X.-Y., Cheng, J.-T., Yang, N.-Y., Wang, L.-L., Wang, F.-L., Luan, C., Liu, J., Li, Z.-L., Gu, Q.-S. & Liu, X.-Y. Enantioconvergent Cu-catalyzed radical C–N coupling of racemic secondary alkyl halides to access  $\alpha$ -chiral primary amines. *J. Am. Chem. Soc.* **143**, 15413–15419 (2021).
4. Kainz, Q. M., Matier, C. D., Bartoszewicz, A., Zultanski, S. L., Peters, J. C. & Fu, G. C. Asymmetric copper-catalyzed C–N cross-couplings induced by visible light. *Science* **351**, 681–684 (2016).
5. Tanasova, M., Yang, Q., Olmsted, C. C., Vasileiou, C., Li, X., Anyika, M. & Borhan, B. An unusual conformation of  $\alpha$ -haloamides due to cooperative binding with zincated porphyrins. *Eur. J. Org. Chem.* **2009**, 4242–4253 (2009).
6. Wang, F.-L., Yang, C.-J., Liu, J.-R., Yang, N.-Y., Dong, X.-Y., Jiang, R.-Q., Chang, X.-Y., Li, Z.-L., Xu, G.-X., Yuan, D.-L., Zhang, Y.-S., Gu, Q.-S., Hong, X.; Liu, X.-Y. Mechanism-based ligand design for copper-catalysed enantioconvergent C( $sp^3$ ) – C( $sp$ ) cross-coupling of tertiary electrophiles with alkynes. *Nat. Chem.* **14**, 949–957 (2022).
7. Murata, Y., Takeuchi, K. & Nishikata, T. The synthetic protocol for  $\alpha$ -bromocarbonyl compounds via brominations. *Tetrahedron* **75**, 2726–2736 (2019).
8. Gaussian 16, Revision A.03, Frisch, M. J., Trucks, G. W., Schlegel, H. B., Scuseria, G. E., Robb, M. A., Cheeseman, J. R., Scalmani, G., Barone, V., Petersson, G. A., Nakatsuji, H., Li, X., Caricato, M., Marenich, A. V., Bloino, J., Janesko, B. G., Gomperts, R., Mennucci, B., Hratchian, H. P., Ortiz, J. V., Izmaylov, A. F., Sonnenberg, J. L., Williams-Young, D., Ding, F., Lipparini, F., Egidi, F., Goings, J., Peng, B., Petrone, A., Henderson, T., Ranasinghe, D., Zakrzewski, V. G., Gao, J., Rega, N., Zheng, G., Liang, W., Hada, M., Ehara, M., Toyota, K., Fukuda, R., Hasegawa, J., Ishida, M., Nakajima, T., Honda, Y., Kitao, O., Nakai, H., Vreven, T., Throssell, K., Montgomery, J. A. Jr., Peralta, J. E., Ogliaro, F., Bearpark, M. J., Heyd, J. J., Brothers, E. N., Kudin, K. N., Staroverov, V. N., Keith, T. A., Kobayashi, R., Normand, J., Raghavachari, K., Rendell, A. P., Burant, J. C., Iyengar, S. S., Tomasi, J., Cossi, M., Millam, J. M., Klene, M., Adamo, C., Cammi, R., Ochterski, J. W., Martin, R. L., Morokuma, K., Farkas, O., Foresman, J. B. & Fox, D. J., Gaussian, Inc., Wallingford CT, 2016.
9. (a) Lee, C., Yang, W. & Parr, R. G. Development of the colle-Salvetti correlation-energy formula into a functional of the electron density. *Phys. Rev. B: Condens. Matter Mater. Phys.* **37**, 785–789 (1988). (b) Becke, A. D. Density-functional thermochemistry. III. The role of exact exchange. *J. Chem. Phys.* **98**, 5648–5652 (1993).
10. Grimme, S., Antony, J., Ehrlich, S. & Krieg, H. A consistent and accurate ab initio parametrization of density functional dispersion correction (DFT-D) for the 94 elements H-Pu. *J. Chem. Phys.* **132**, 154104 (2010).
11. Grimme, S., Ehrlich, S. & Goerigk, L. Effect of the damping function in dispersion corrected density functional theory. *J. Comp. Chem.* **32**, 1456–1465 (2011).
12. (a) Hay, P. J. & Wadt, W. R. *Ab initio* effective core potentials for molecular calculations.

Potentials for the transition metal atoms Sc to Hg. *J. Chem. Phys.* **82**, 270–283 (1985). (b) Wadt, W. R. & Hay, P. J. *Ab initio* effective core potentials for molecular calculations. Potentials for main group elements Na to Bi. *J. Chem. Phys.* **82**, 284–298 (1985). (c) Hay, P. J. & Wadt, W. R. *Ab initio* effective core potentials for molecular calculations. Potentials for K to Au including the outermost core orbitals. *J. Chem. Phys.* **82**, 299–310 (1985).

13. (a) Dunning Jr., T. H. & Hay, P. J. *Modern Theoretical Chemistry*, Ed. Schaefer III, H. F. Vol. 3 (Plenum, New York, 1977) 1–28. (b) Stoll, H., Fuentealba, P., Schwerdtfeger, P., Flad, J., Szentpály, L. V. & Preuss, H. Cu and Ag as one-valence-electron atoms: CI results and quadrupole corrections for Cu<sub>2</sub>, Ag<sub>2</sub>, CuH, and AgH. *J. Chem. Phys.* **81**, 2732–2736 (1984). (c) Dolg, M., Wedig, U., Stoll, H. & Preuss, H. Energy-adjusted *ab initio* pseudopotentials for the first-row transition elements. *J. Chem. Phys.* **86**, 866–872 (1987). (d) Häussermann, U. et al. Accuracy of energy-adjusted quasirelativistic *ab initio* pseudopotentials. *Mole. Phys.* **78**, 1211–1224 (1993). (e) Bergner, A., Dolg, M., Küchle, W., Stoll, H. & Preuss, H. *Ab initio* energy-adjusted pseudopotentials for elements of groups 13–17. *Mole. Phys.* **80**, 1431–1441 (2006).

14. Marenich, A. V., Cramer, C. J. & Truhlar, D. G. Universal solvation model based on solute electron density and on a continuum model of the solvent defined by the bulk dielectric constant and atomic surface tensions. *J. Phys. Chem. B* **113**, 6378–6396 (2009).

15. Legault, C. Y. *CYLView, 1.0b*; Université de Sherbrooke: Québec, Montreal, Canada, 2009; (<http://www.cylview.org>).

## 10. NMR spectra

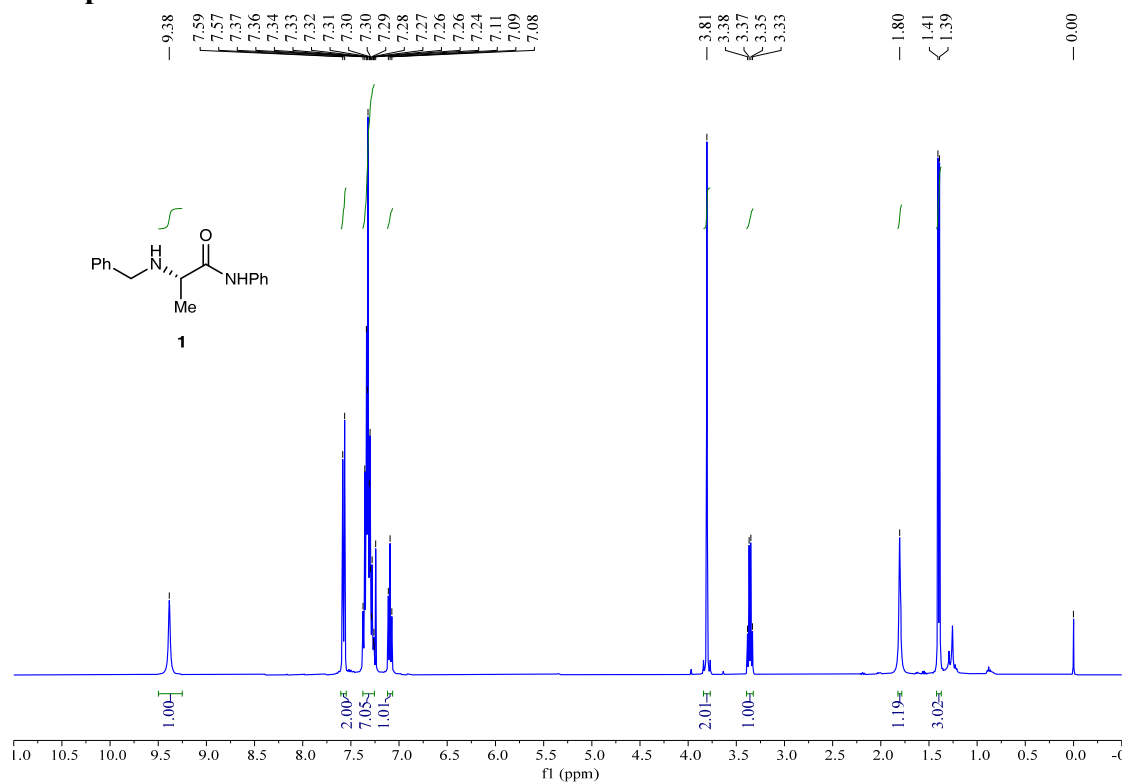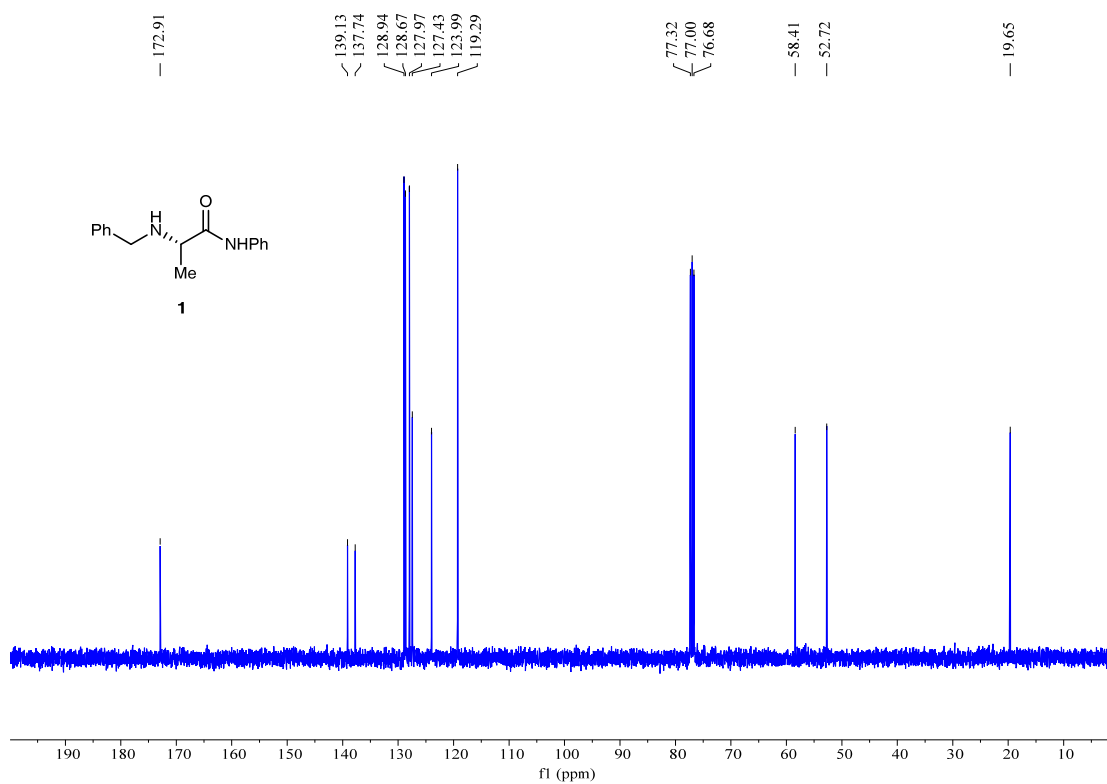

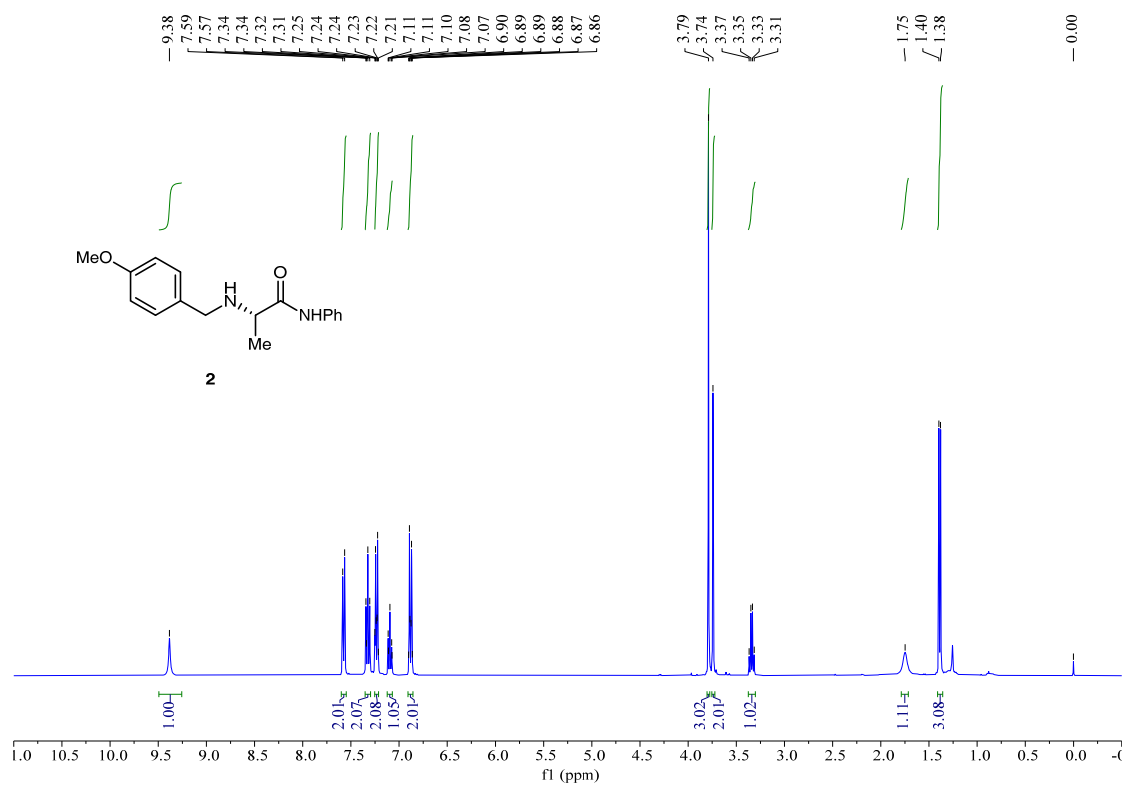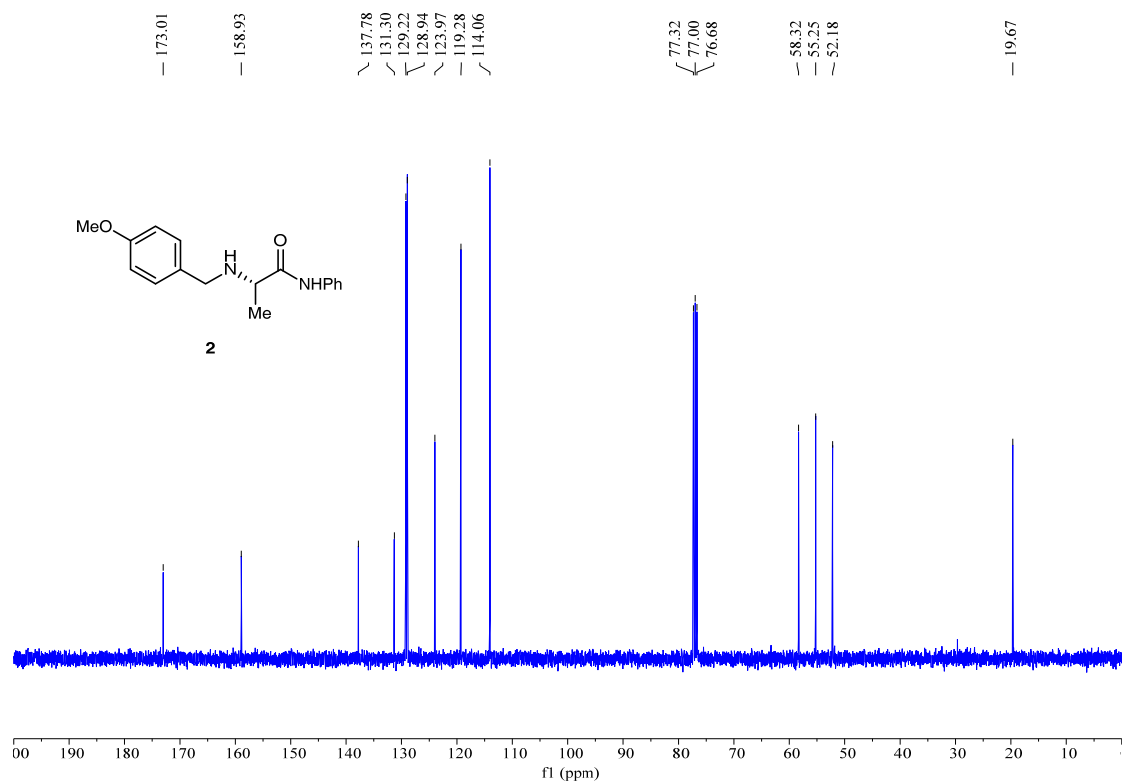

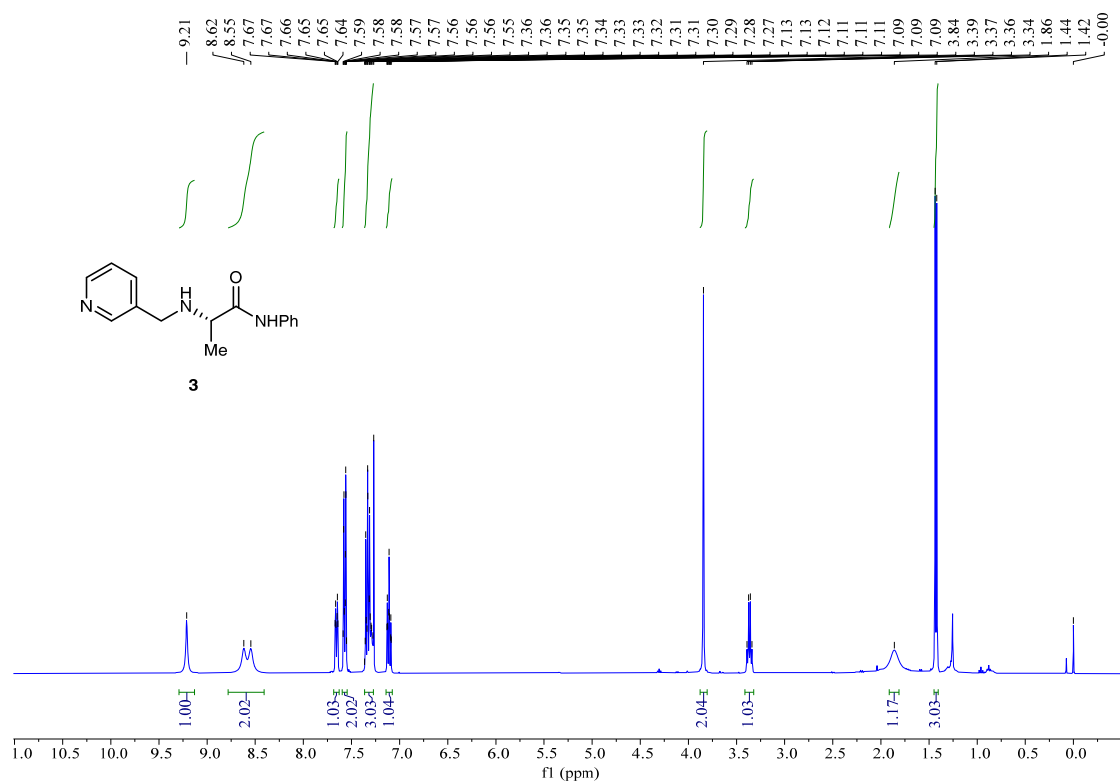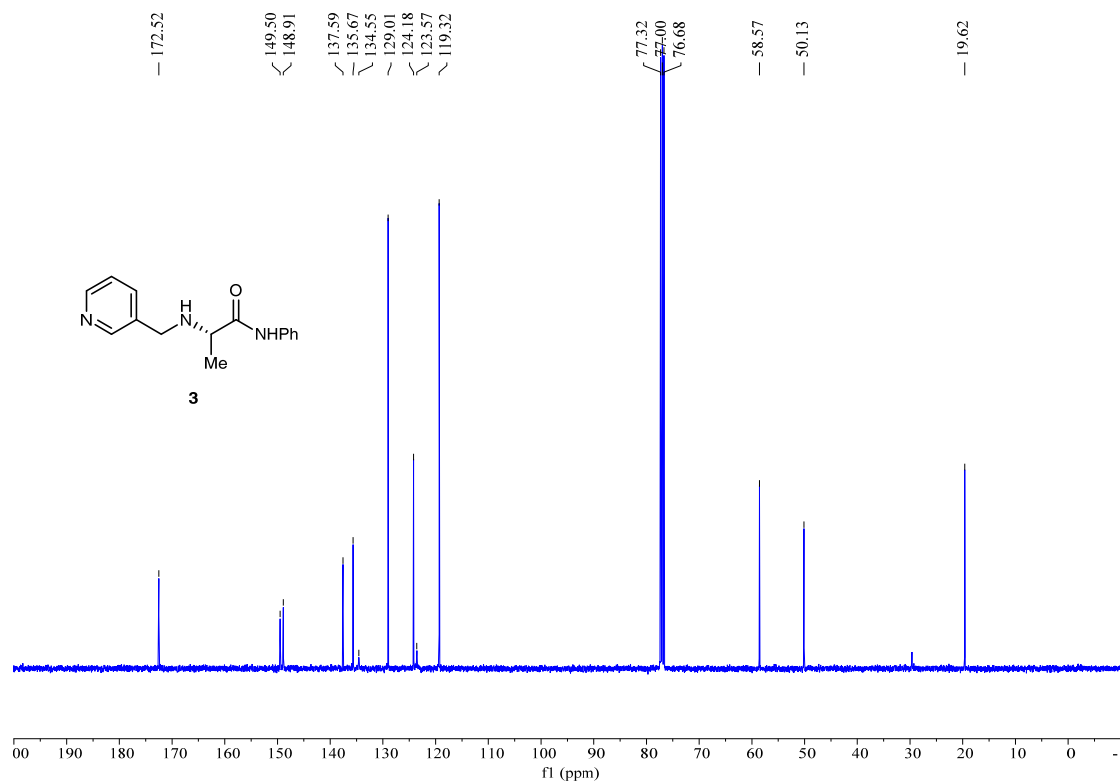

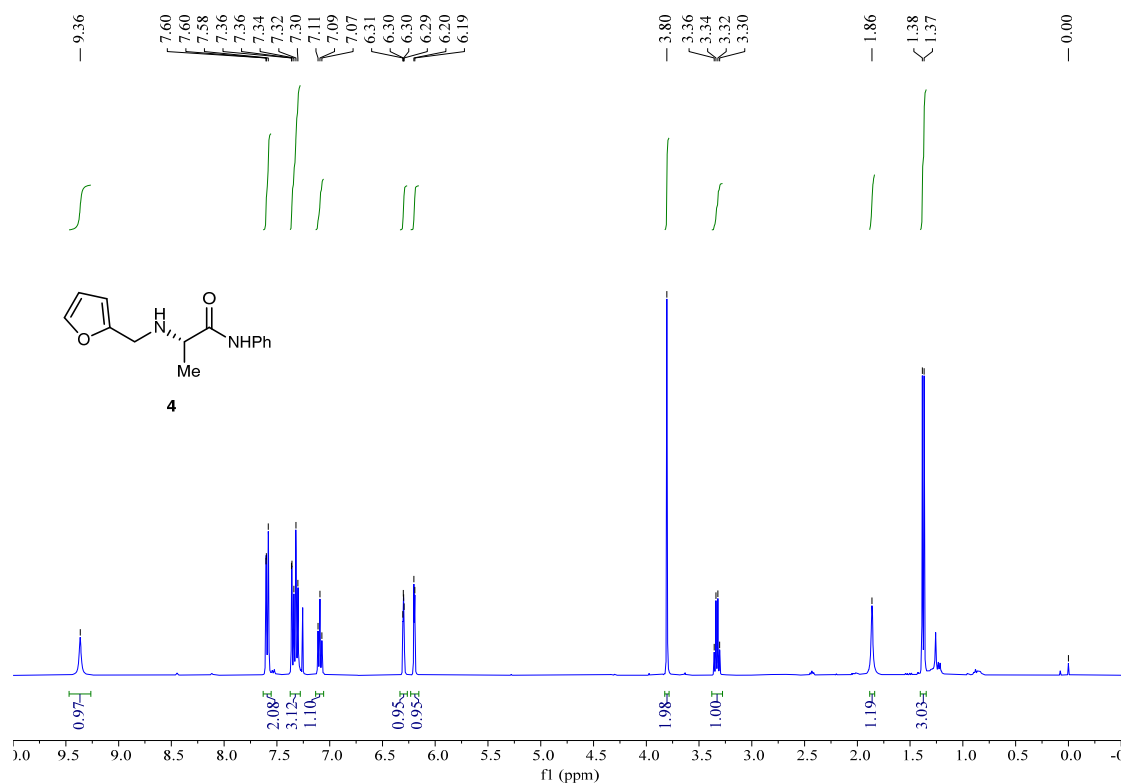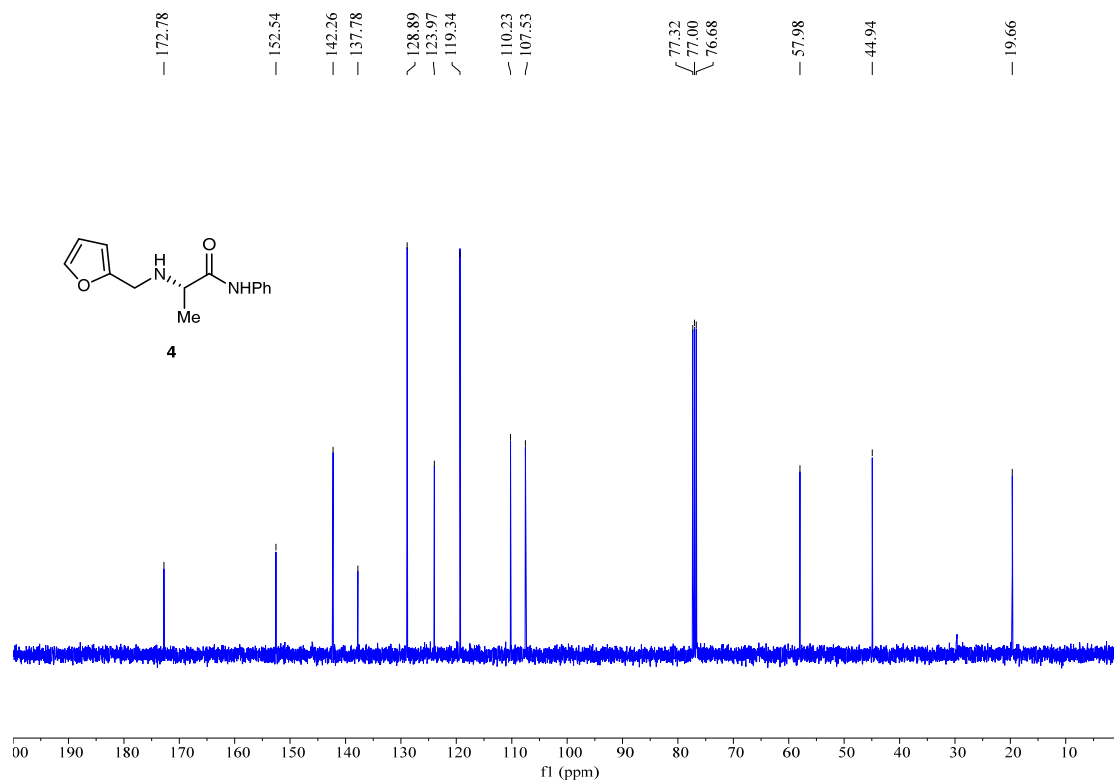

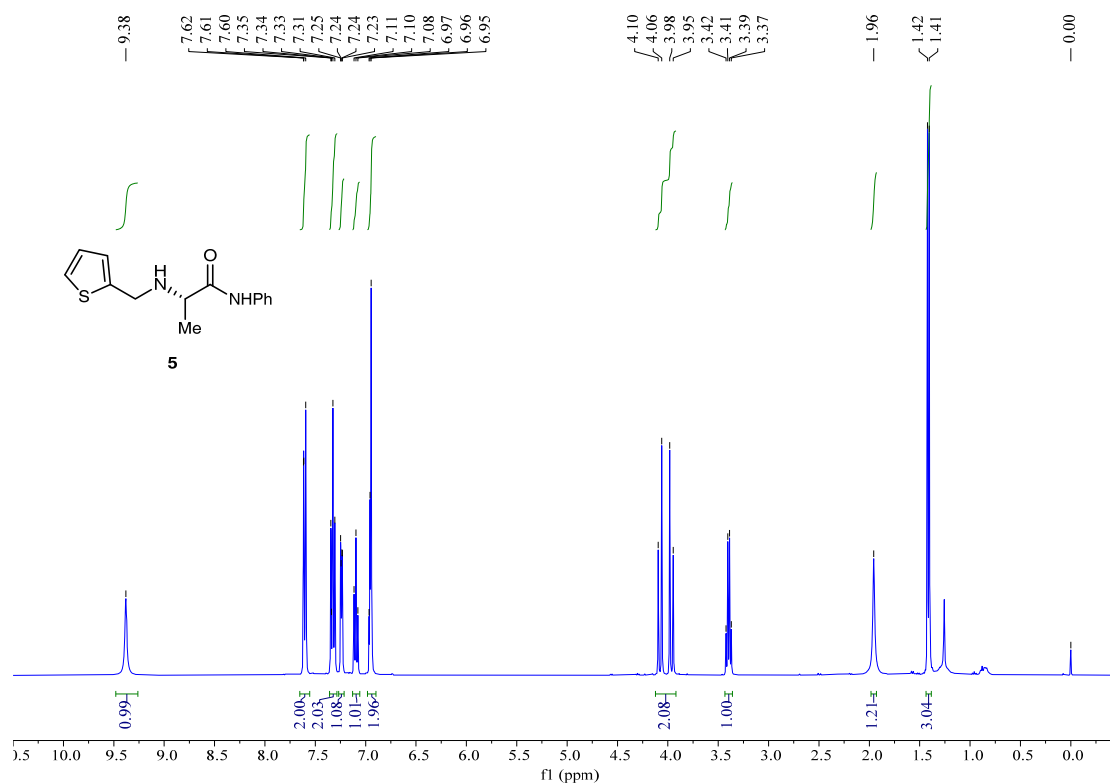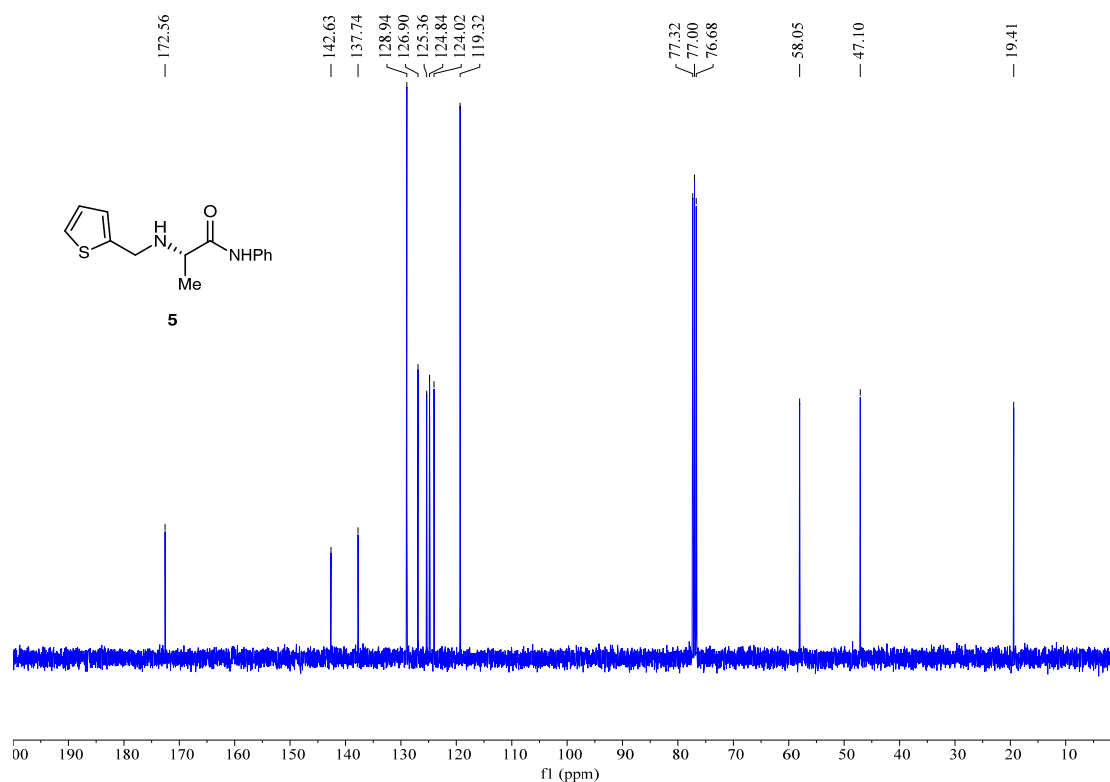



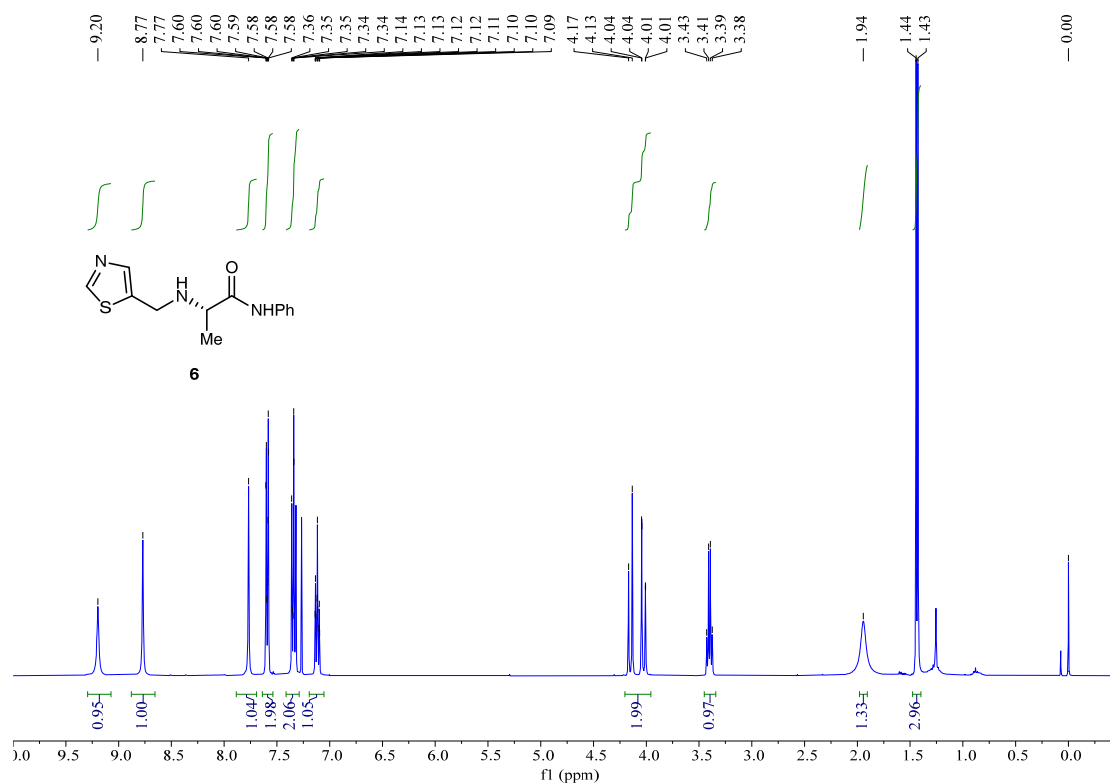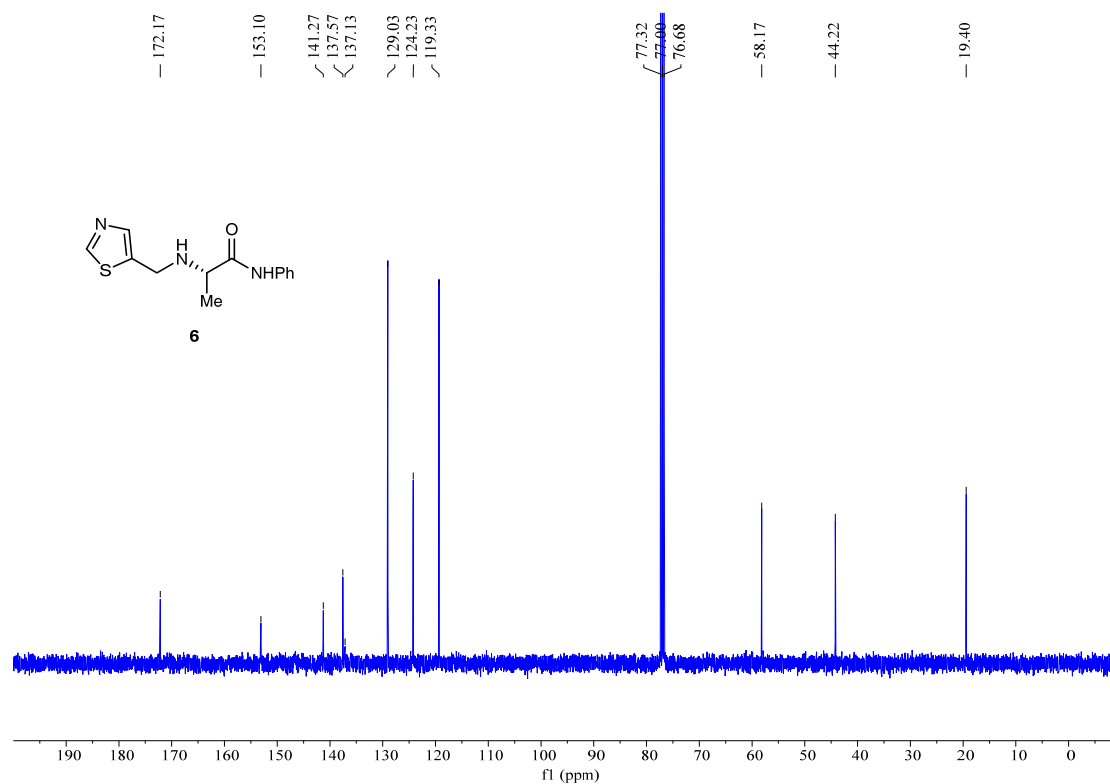

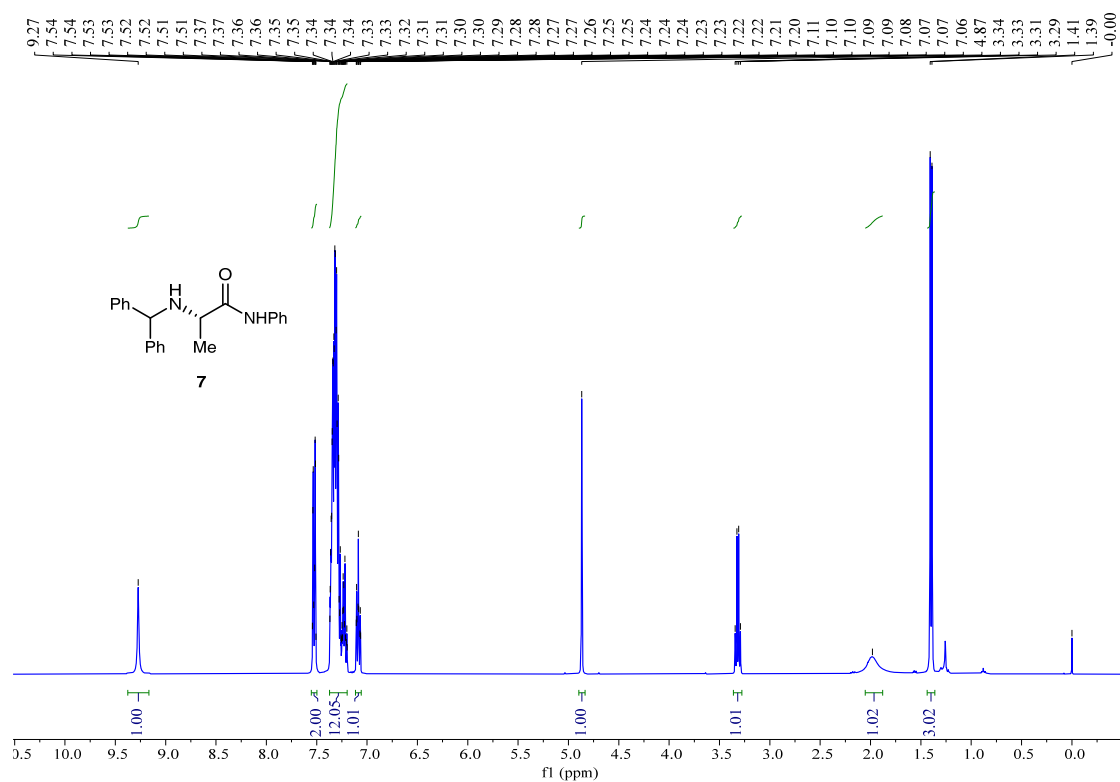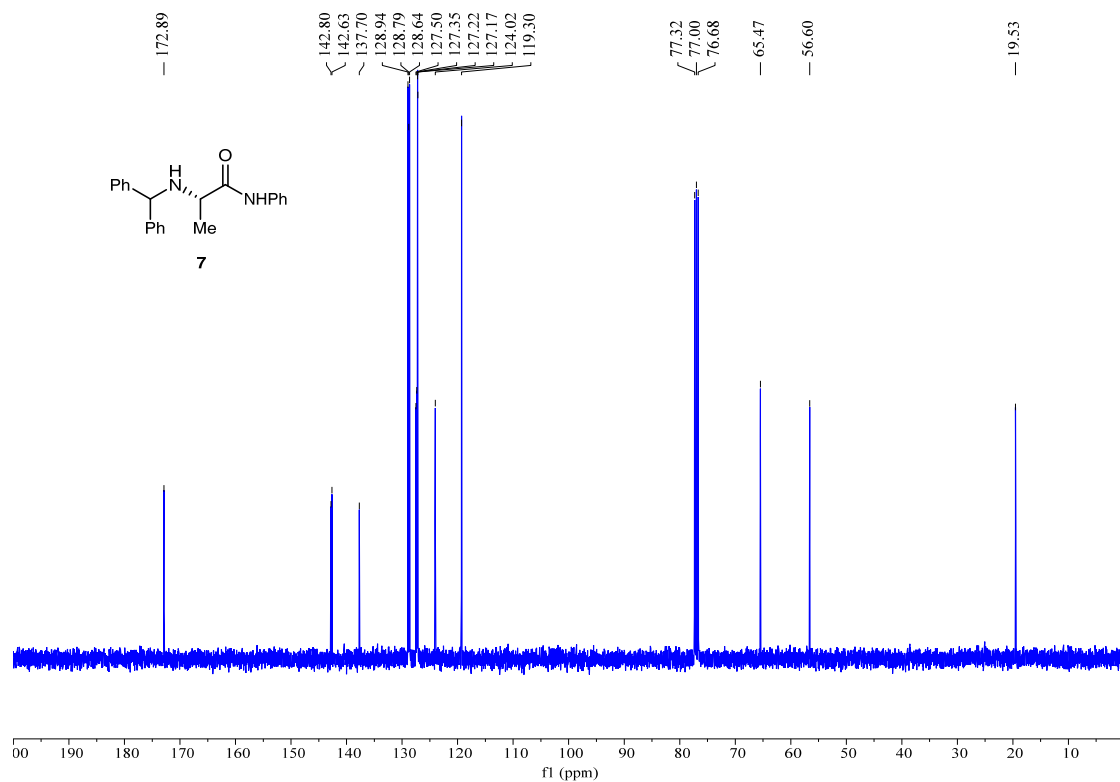

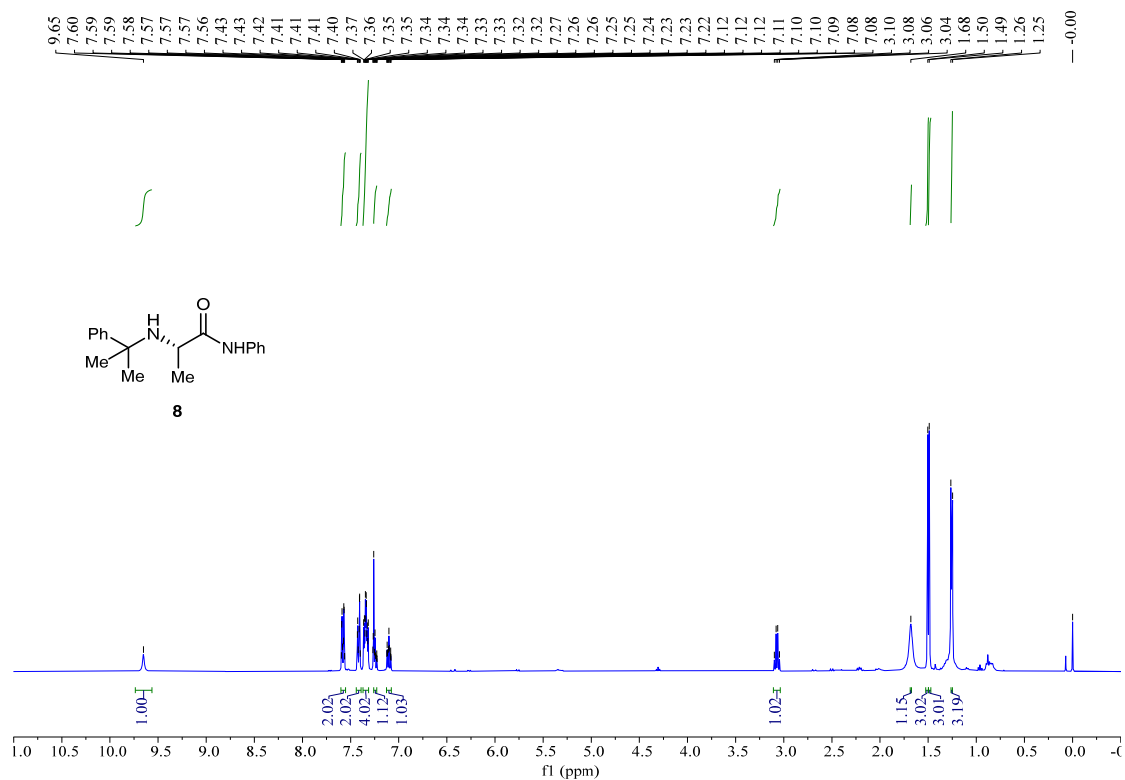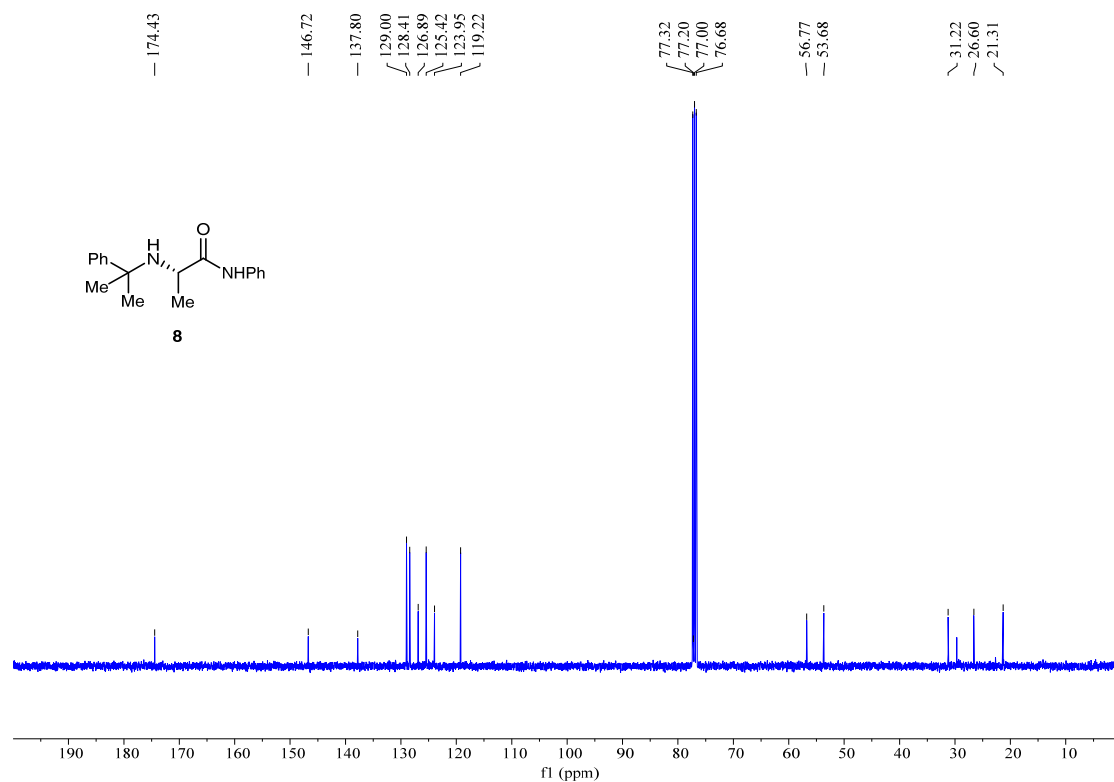

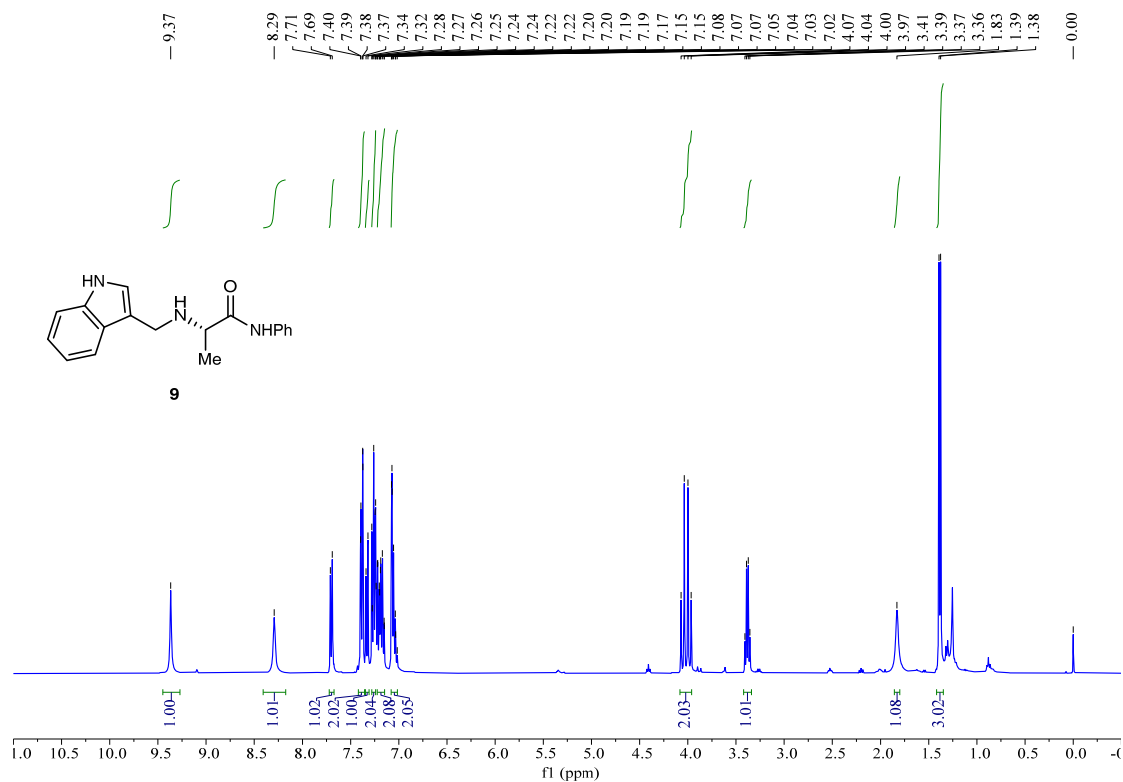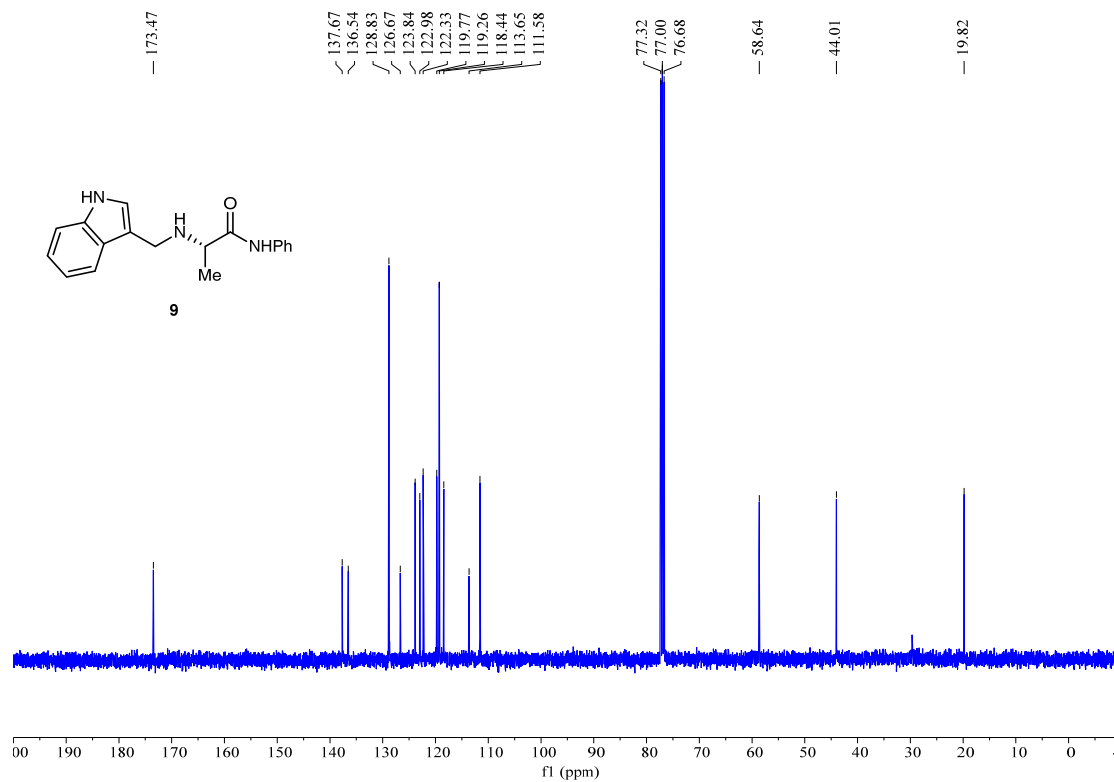

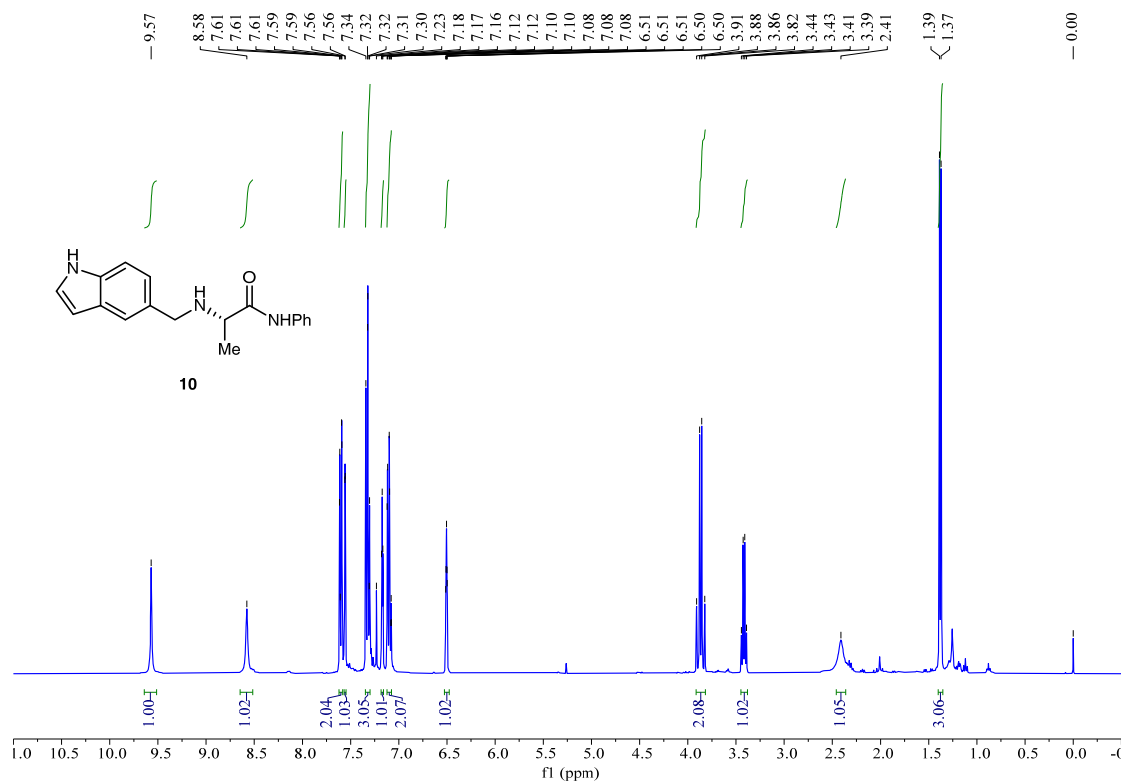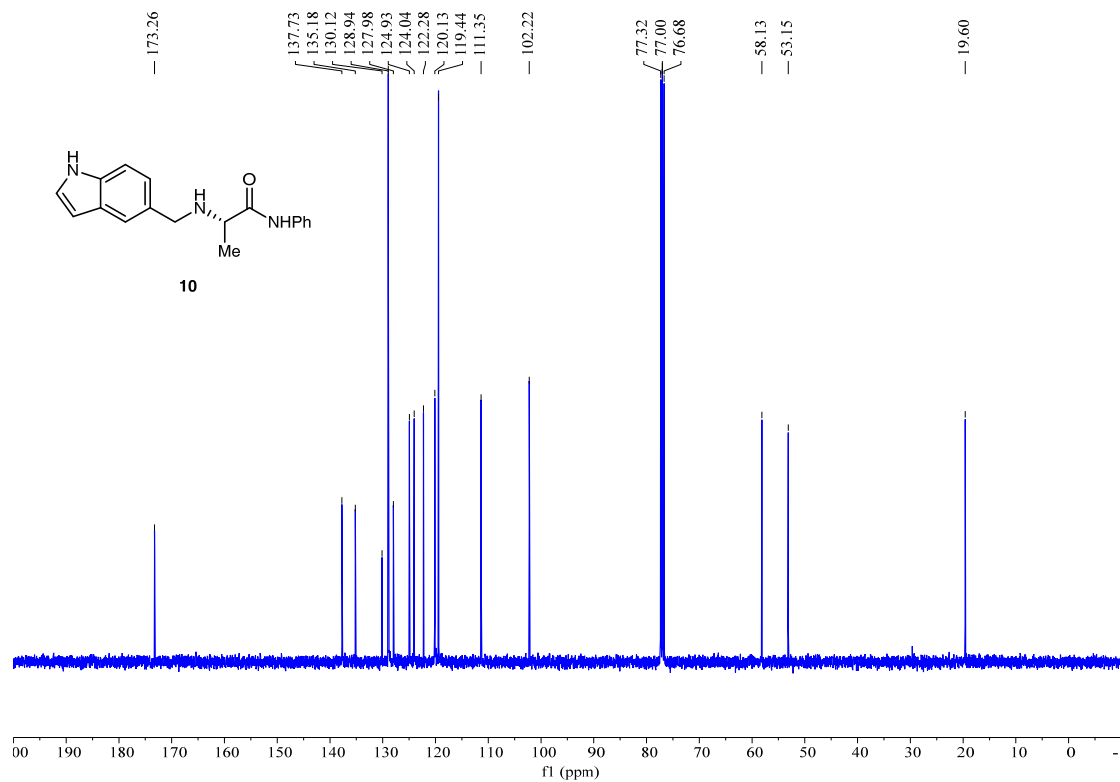

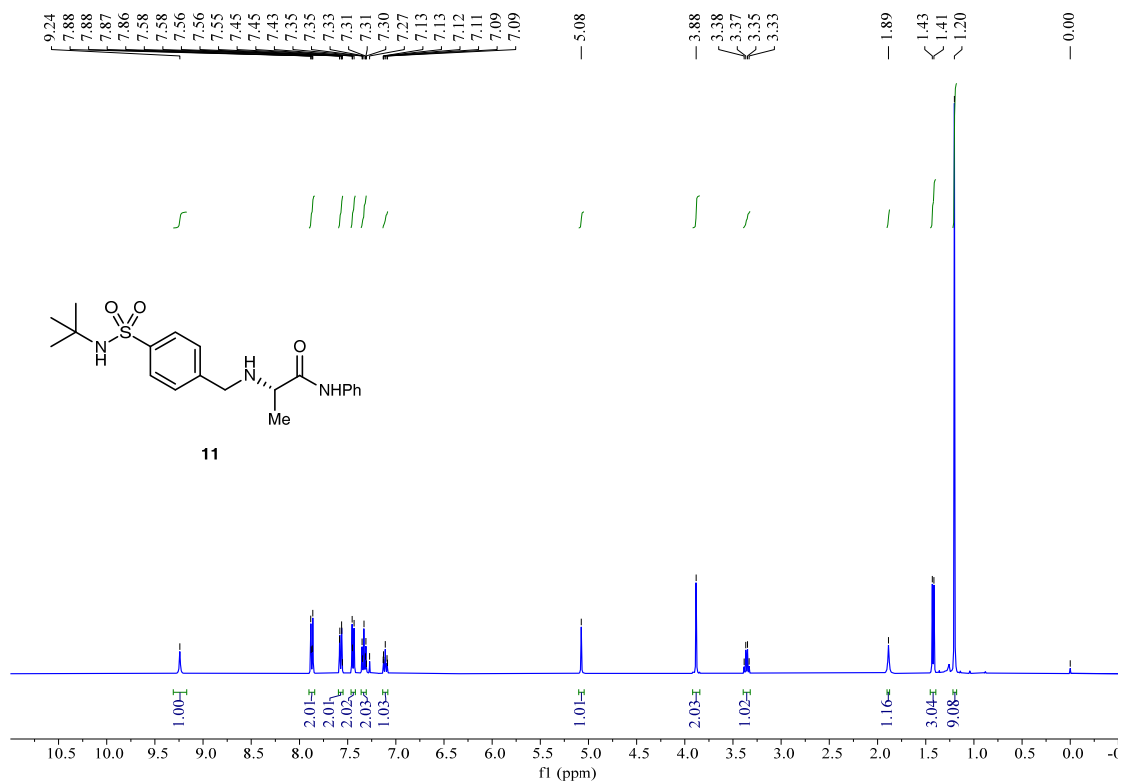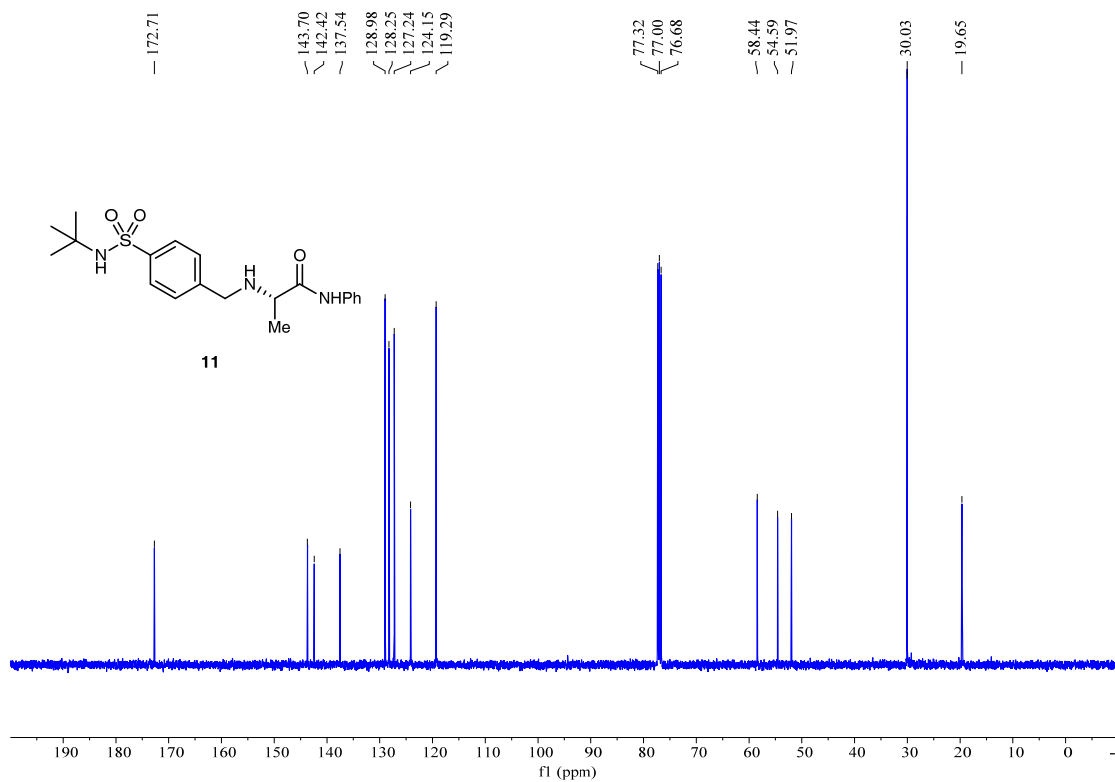

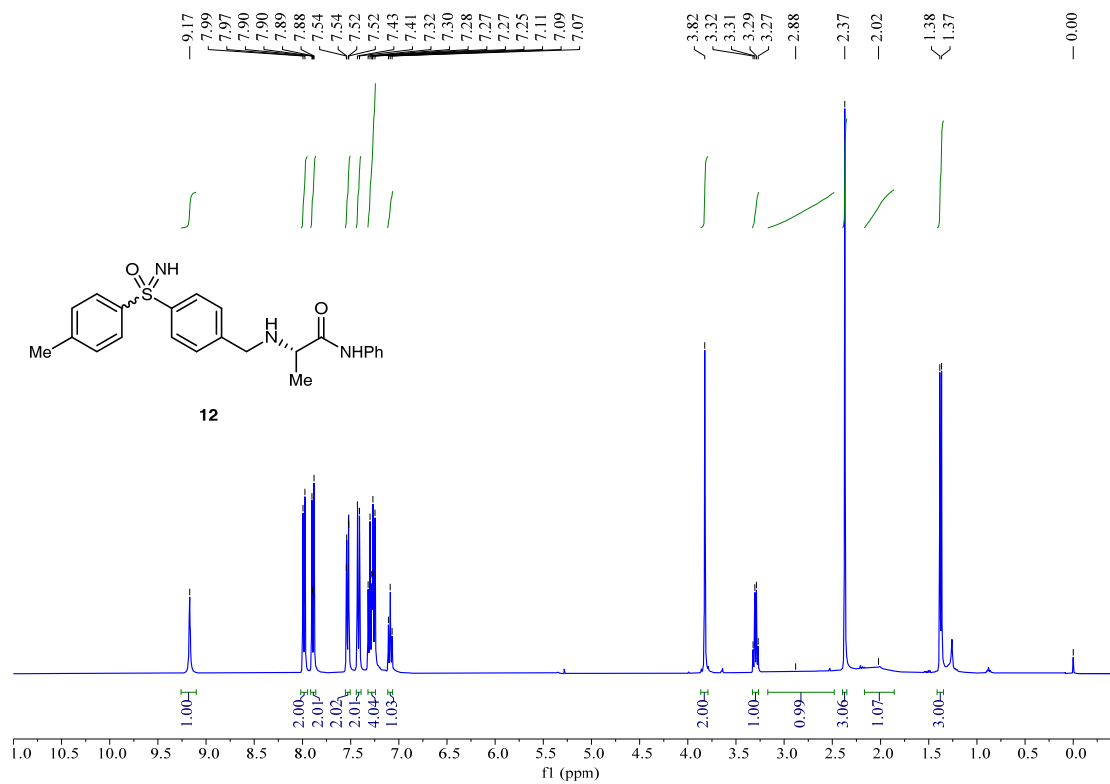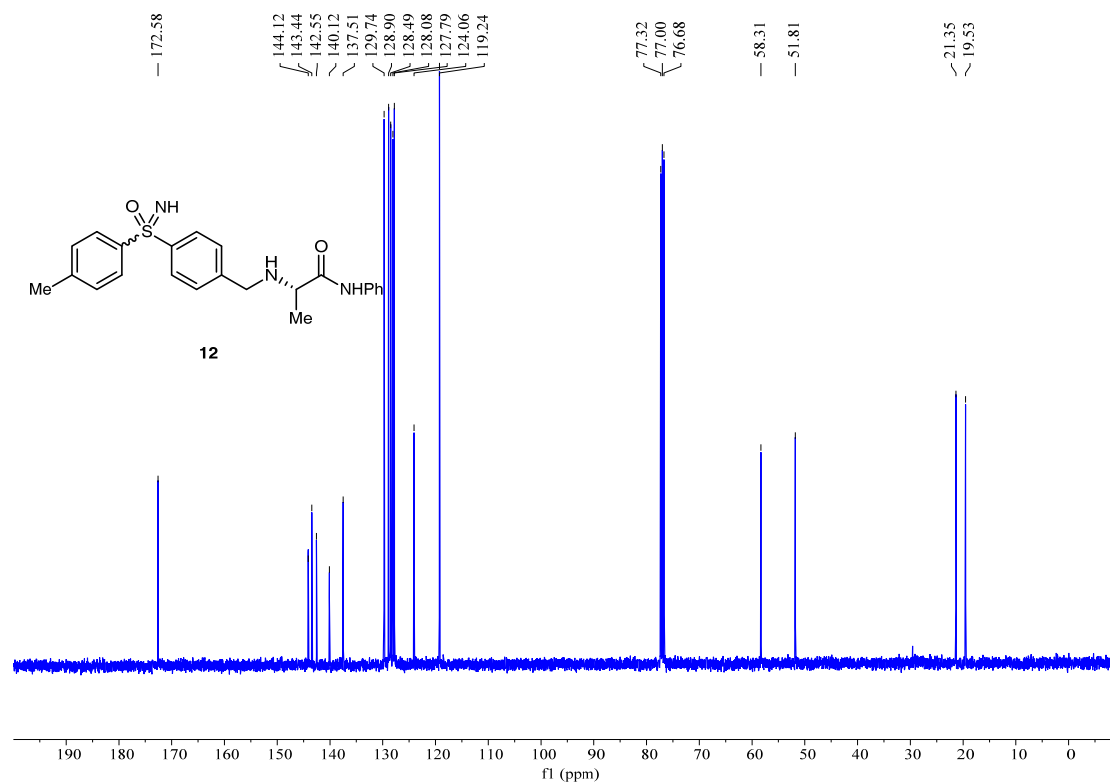

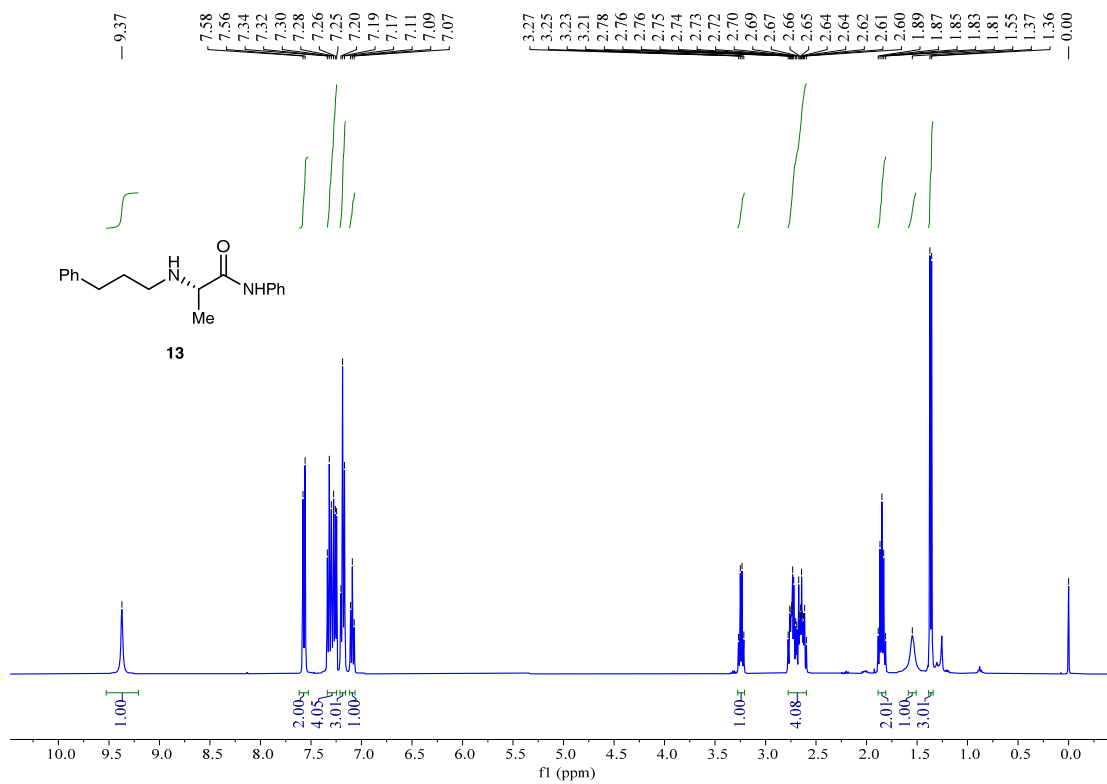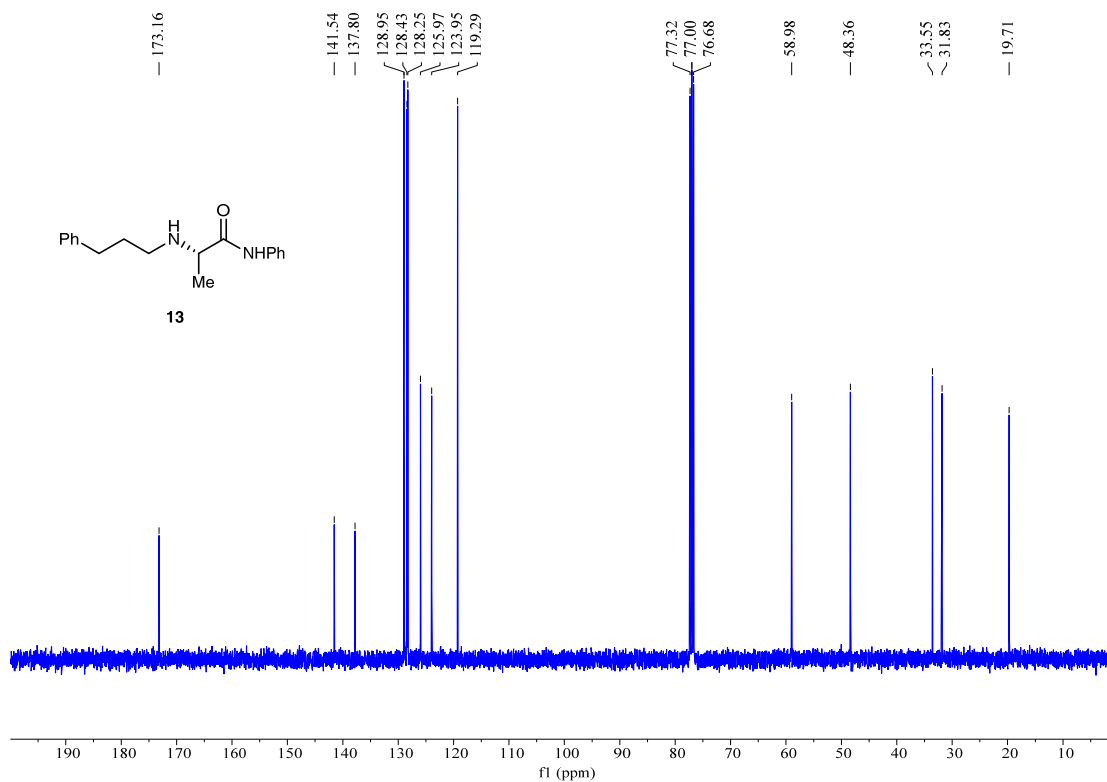



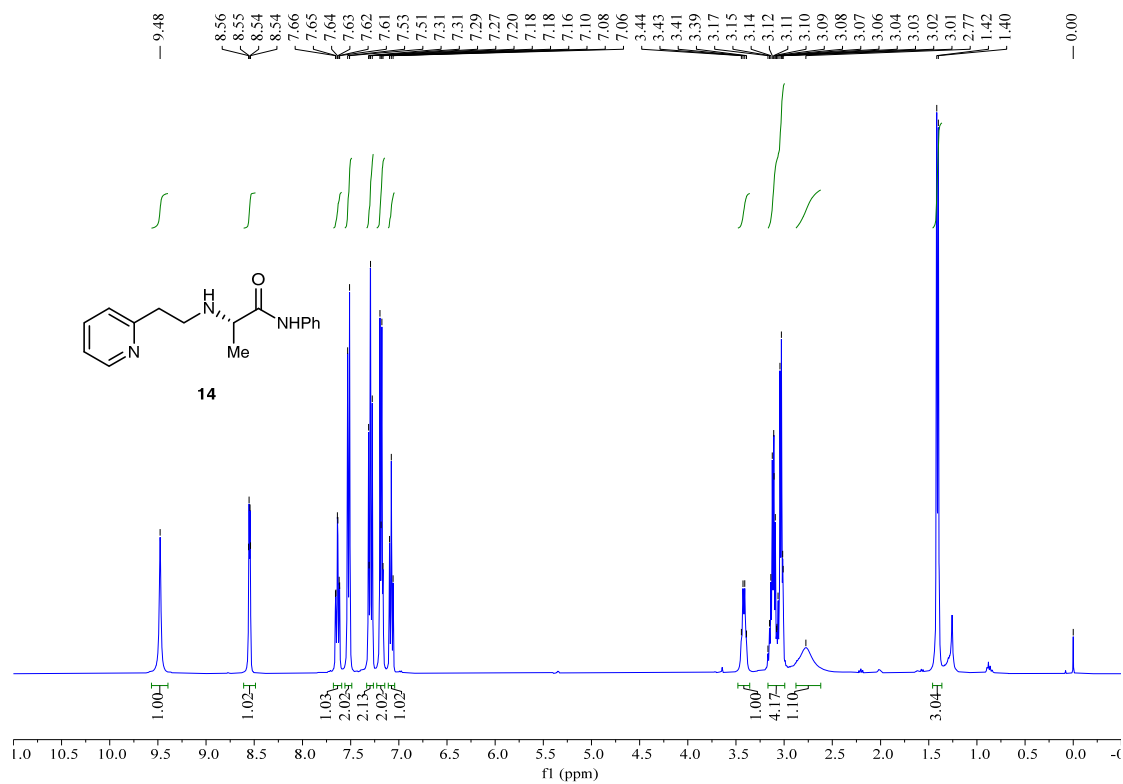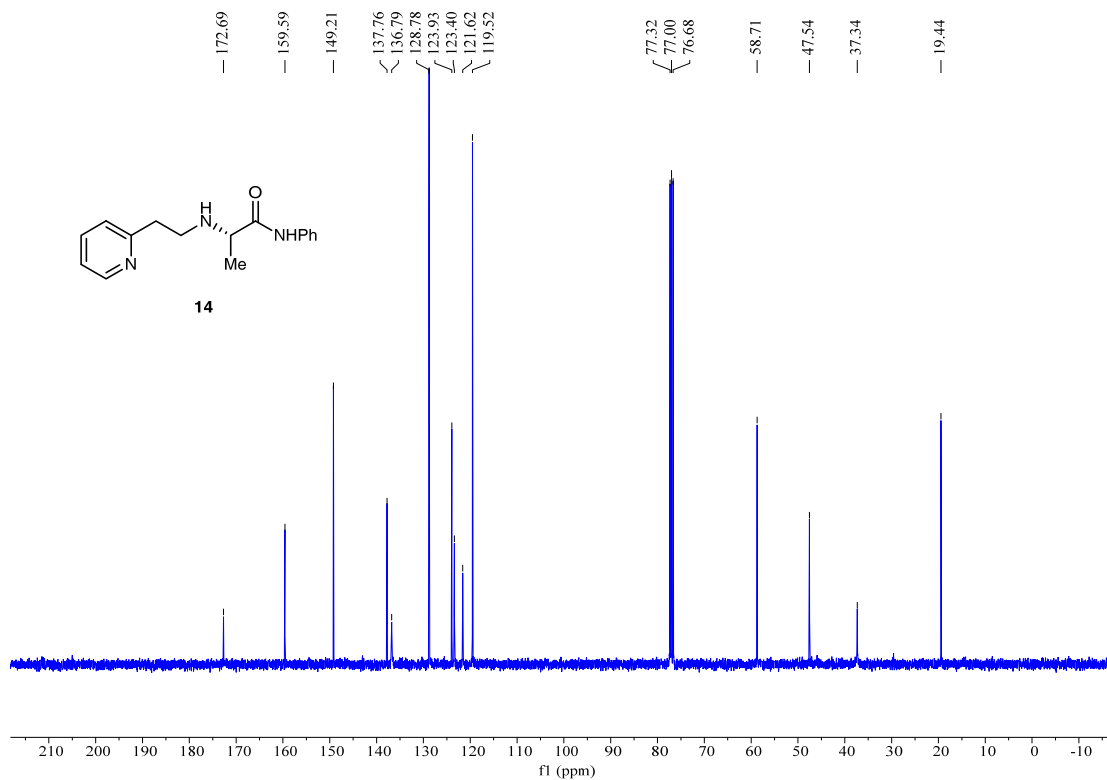

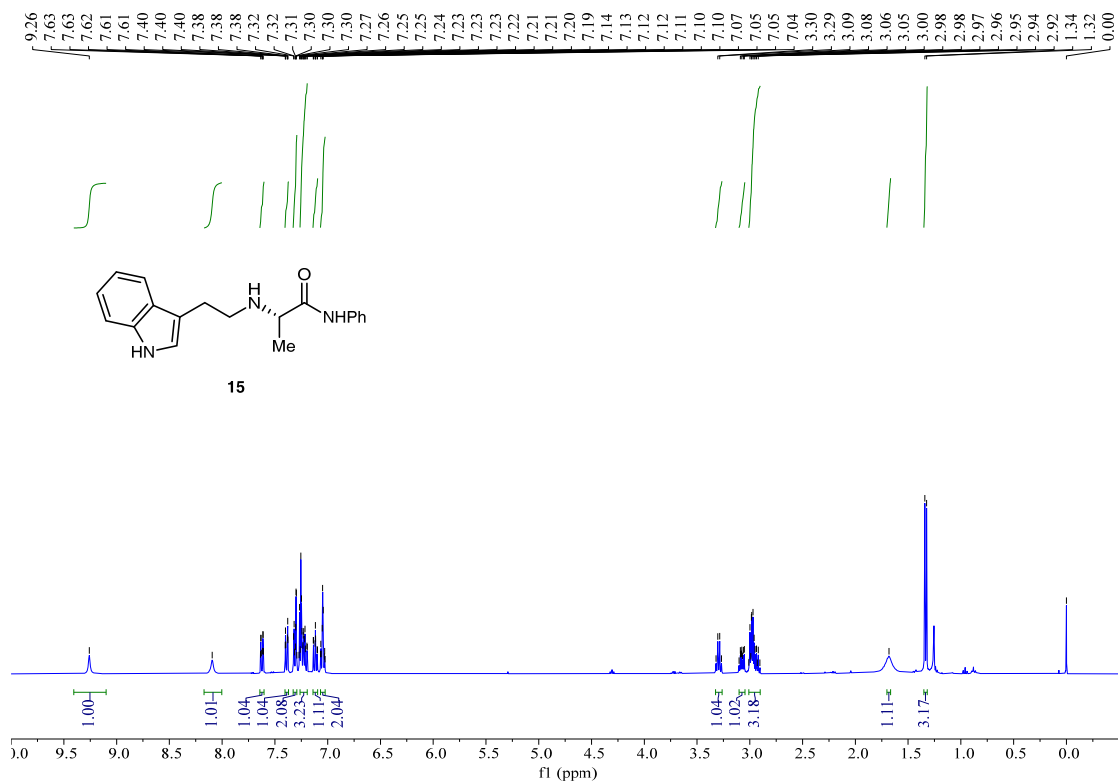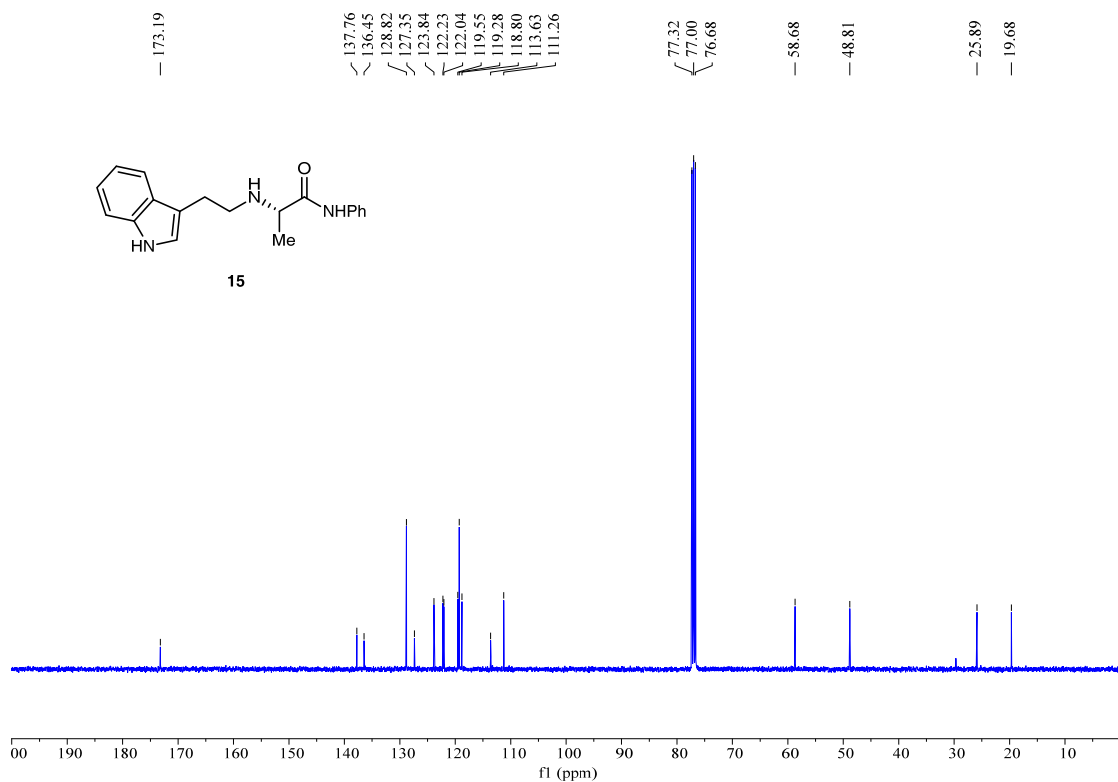

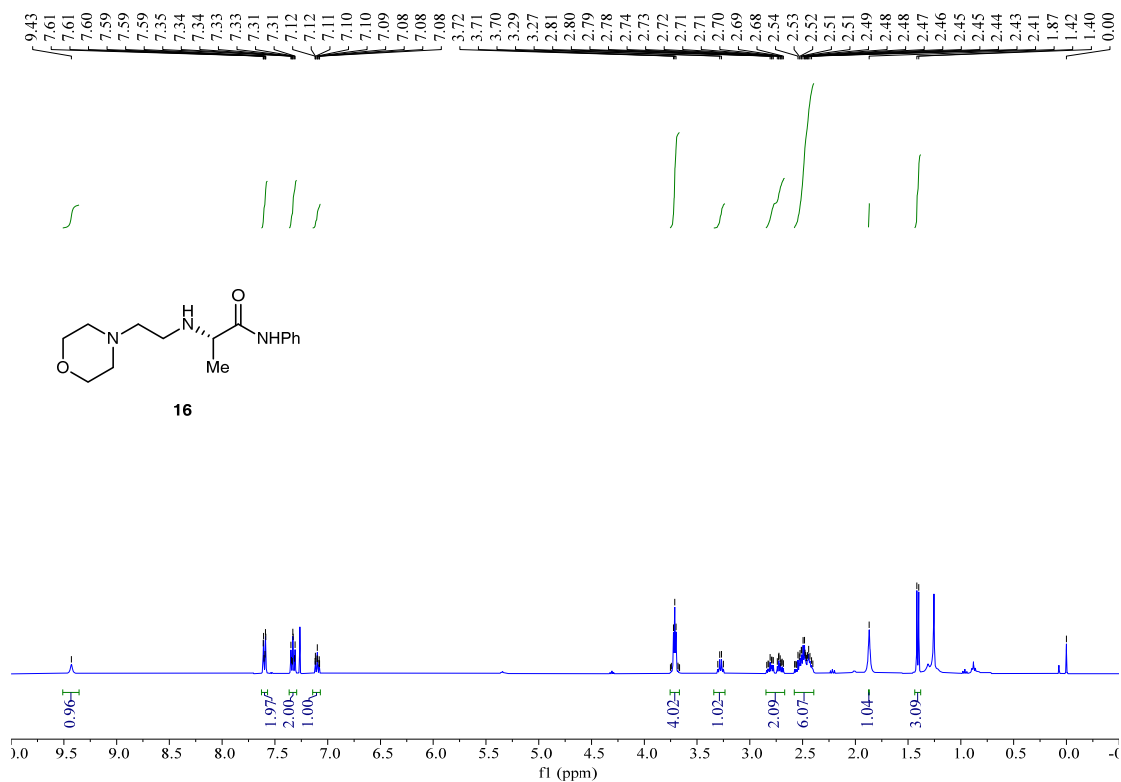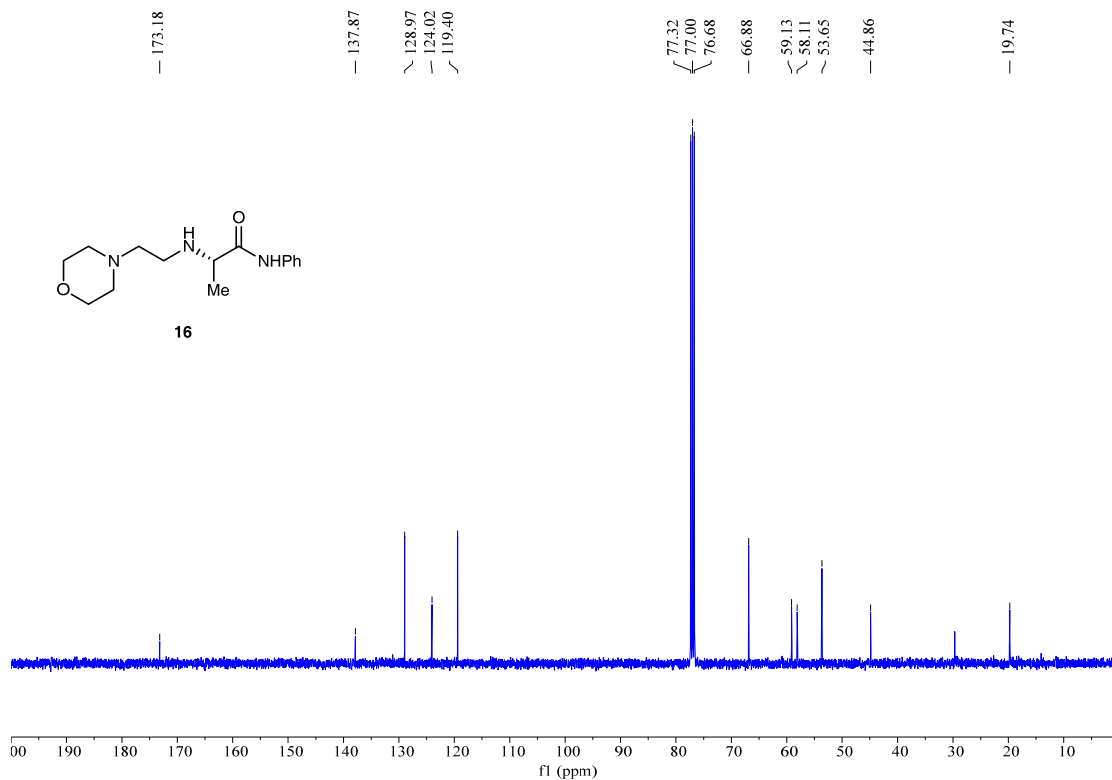

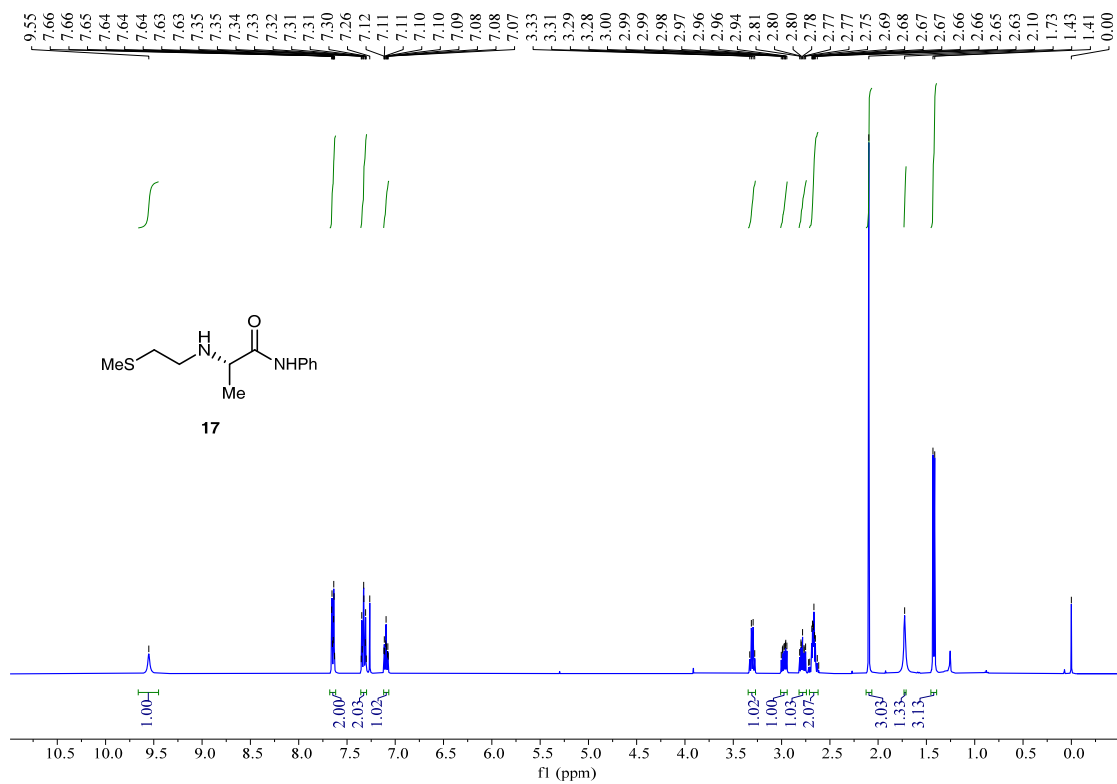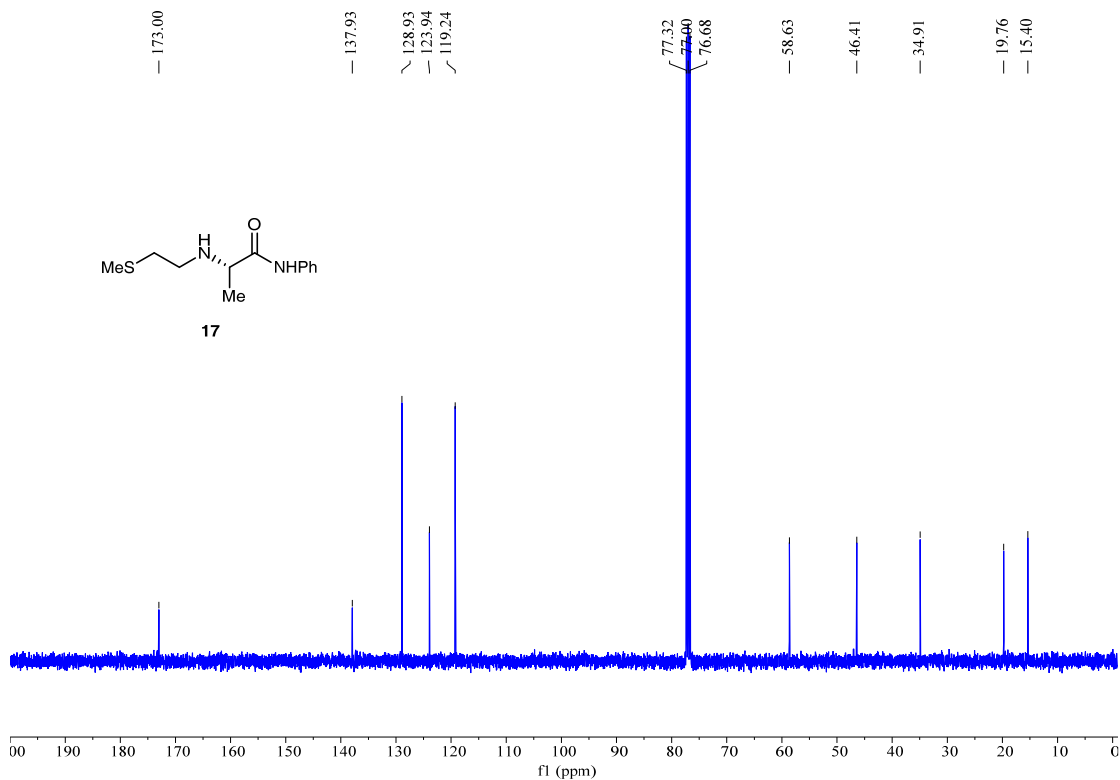

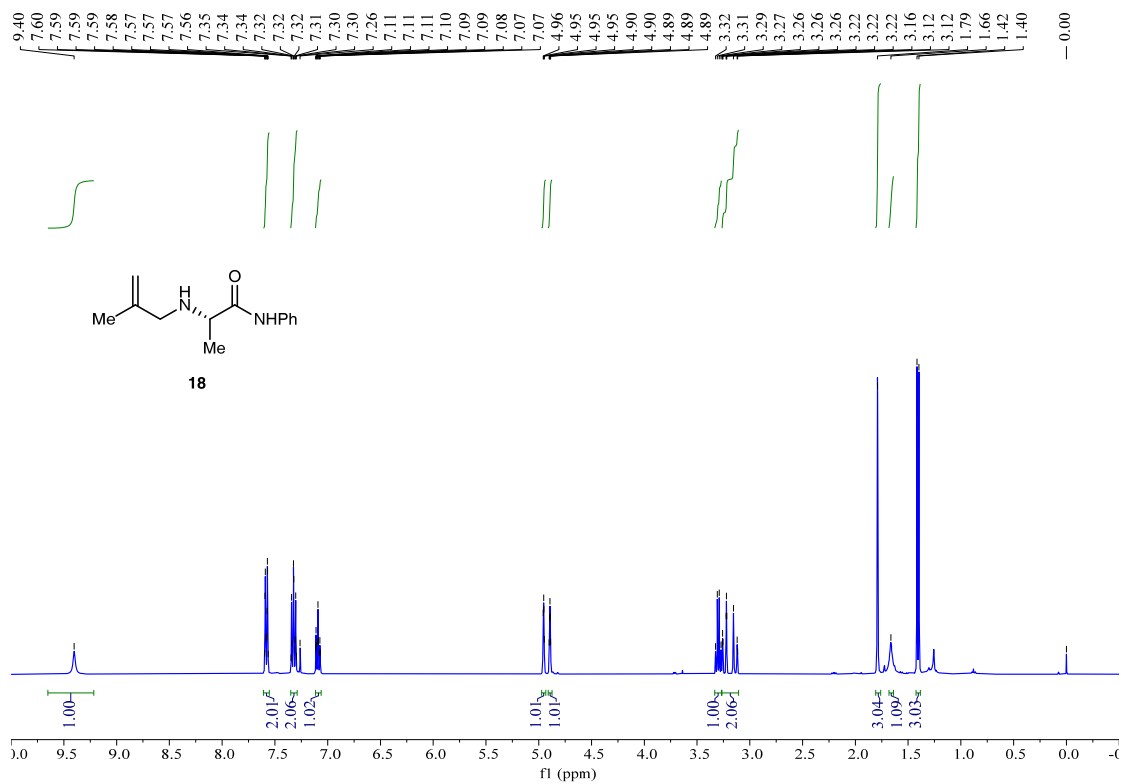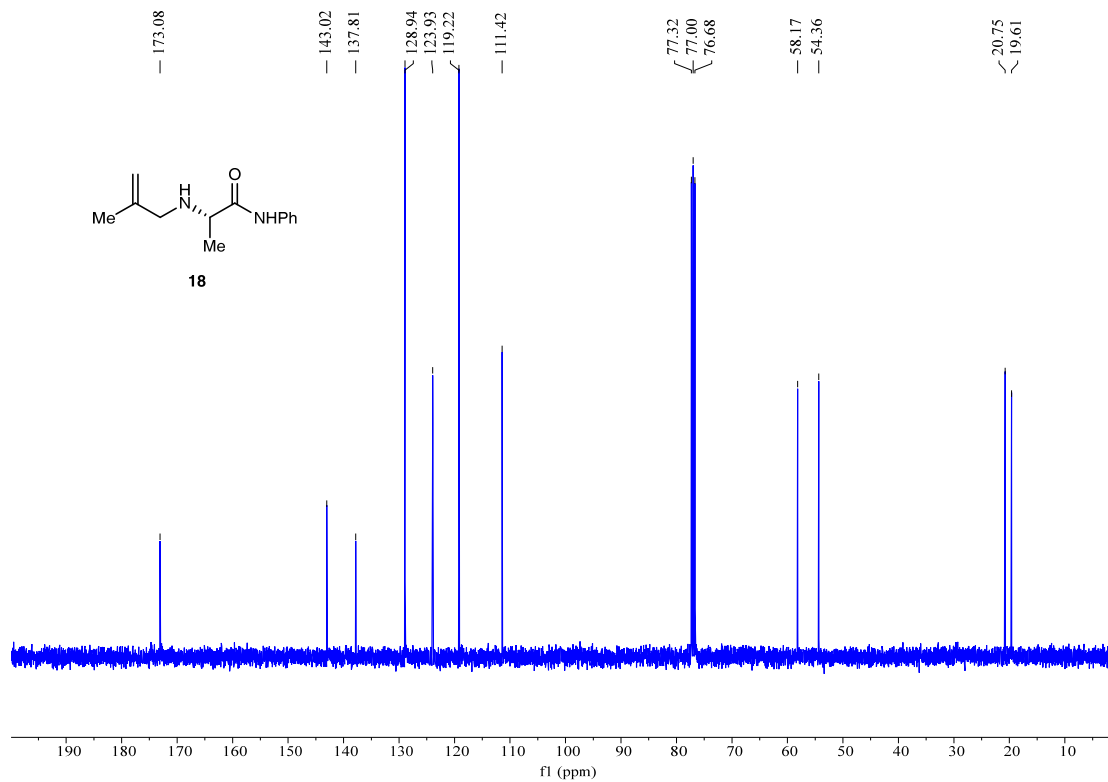

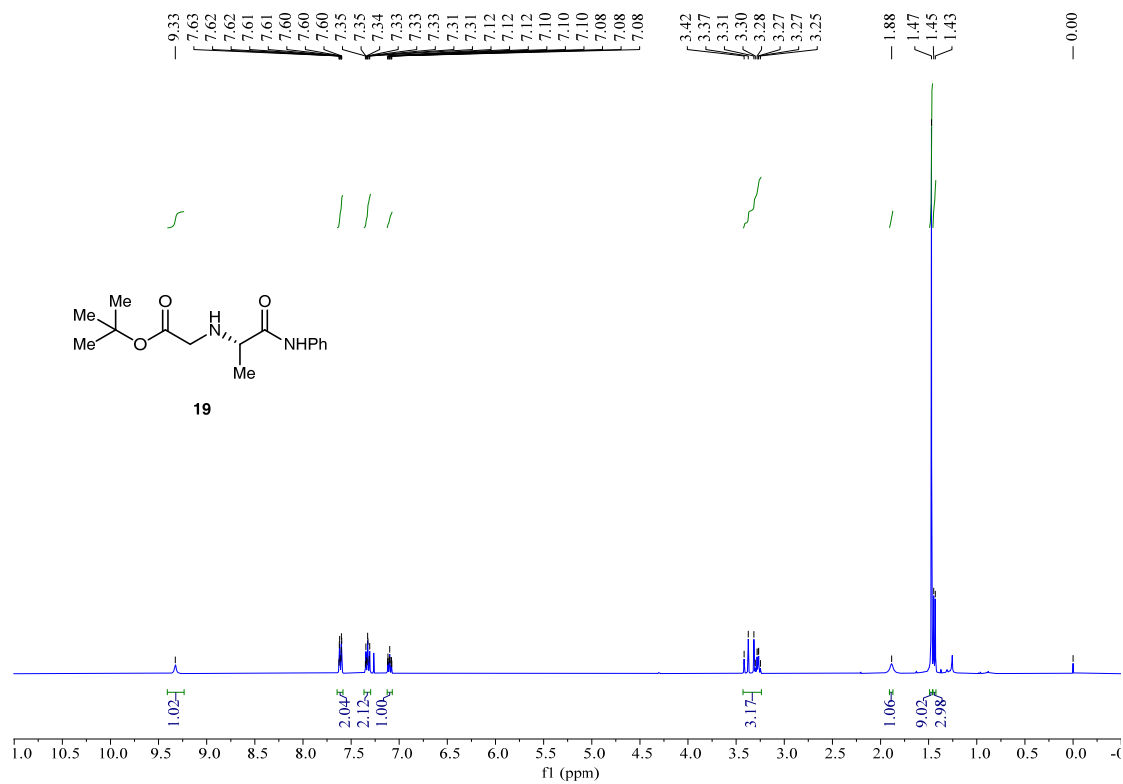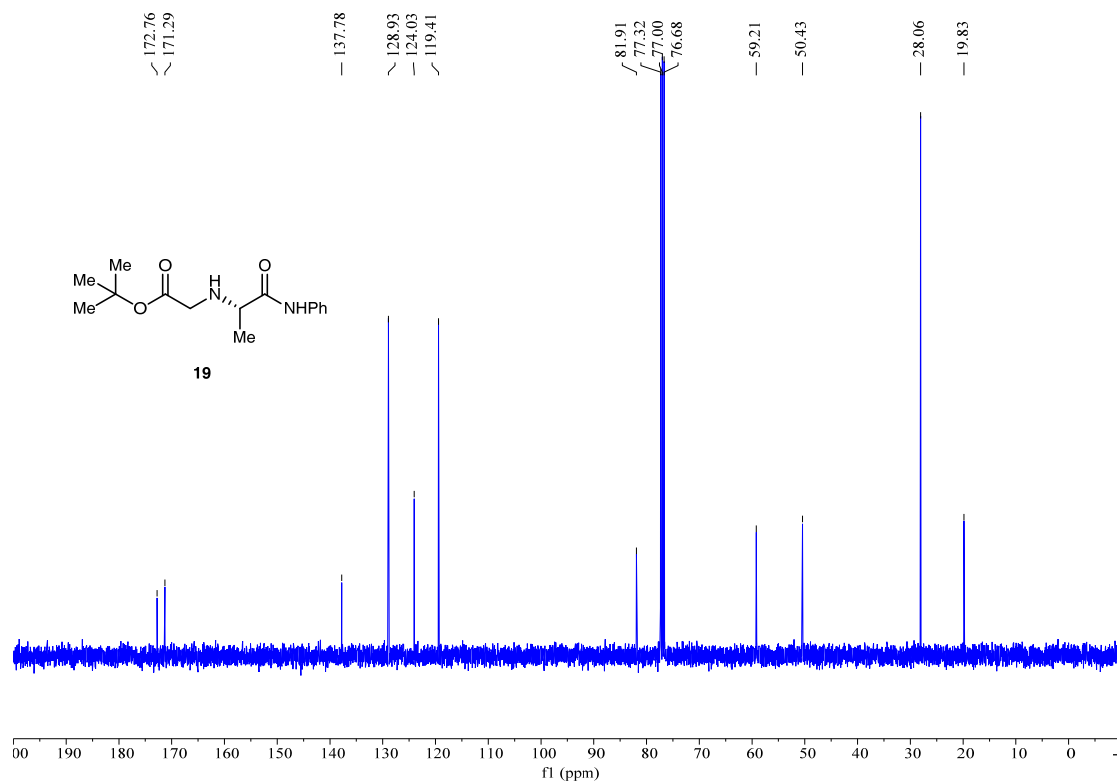

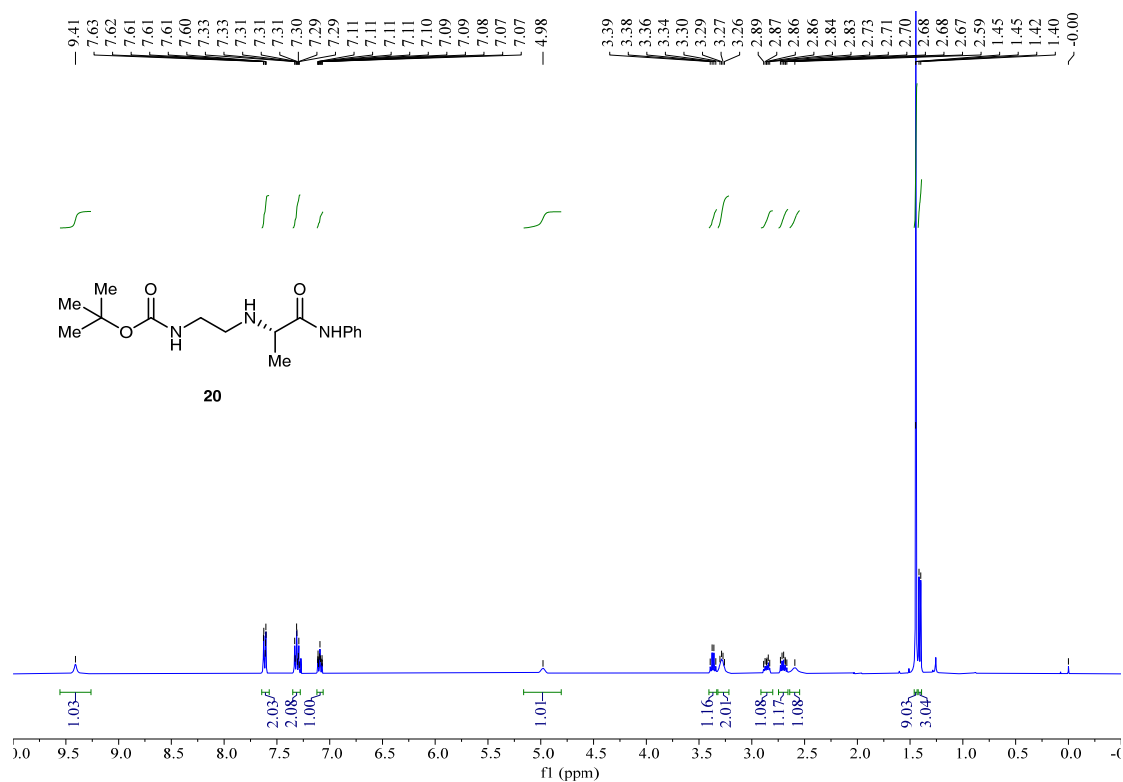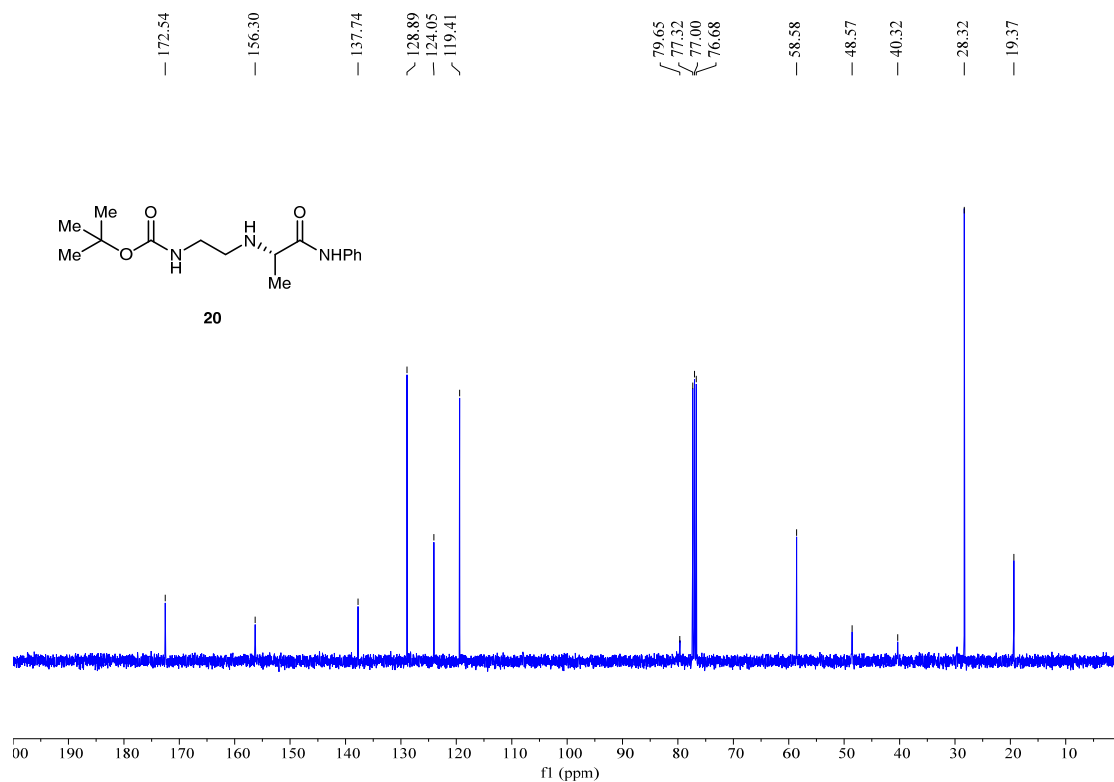

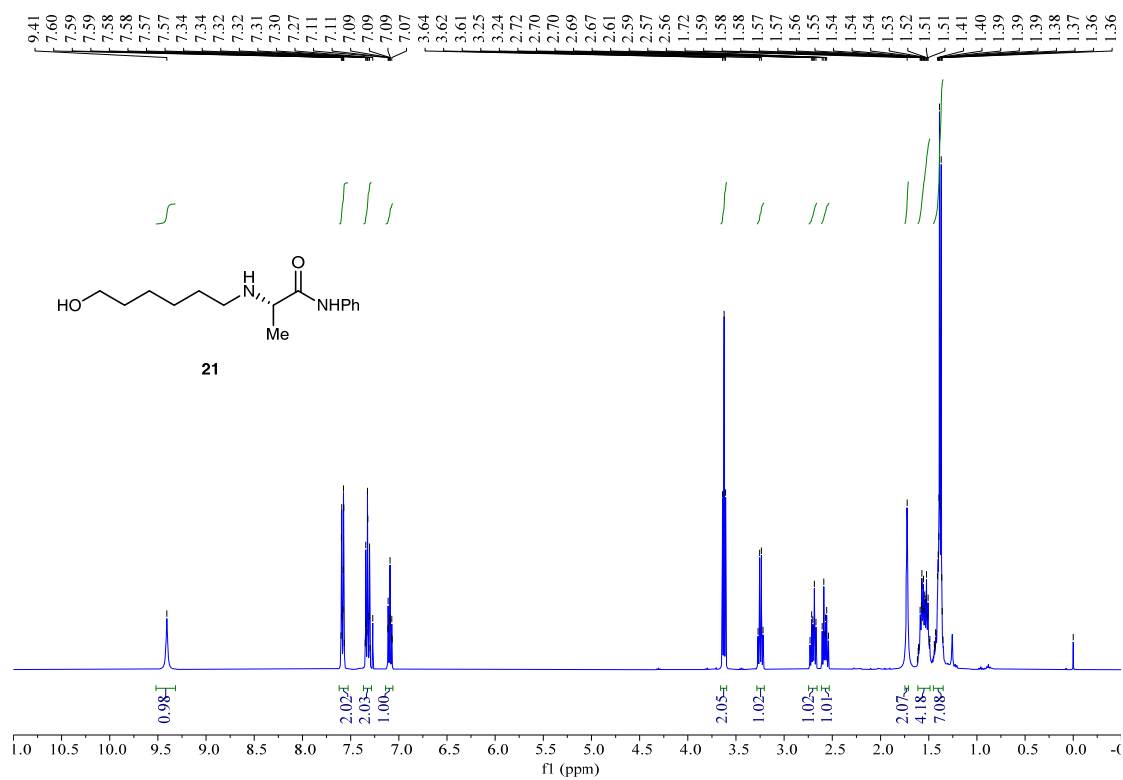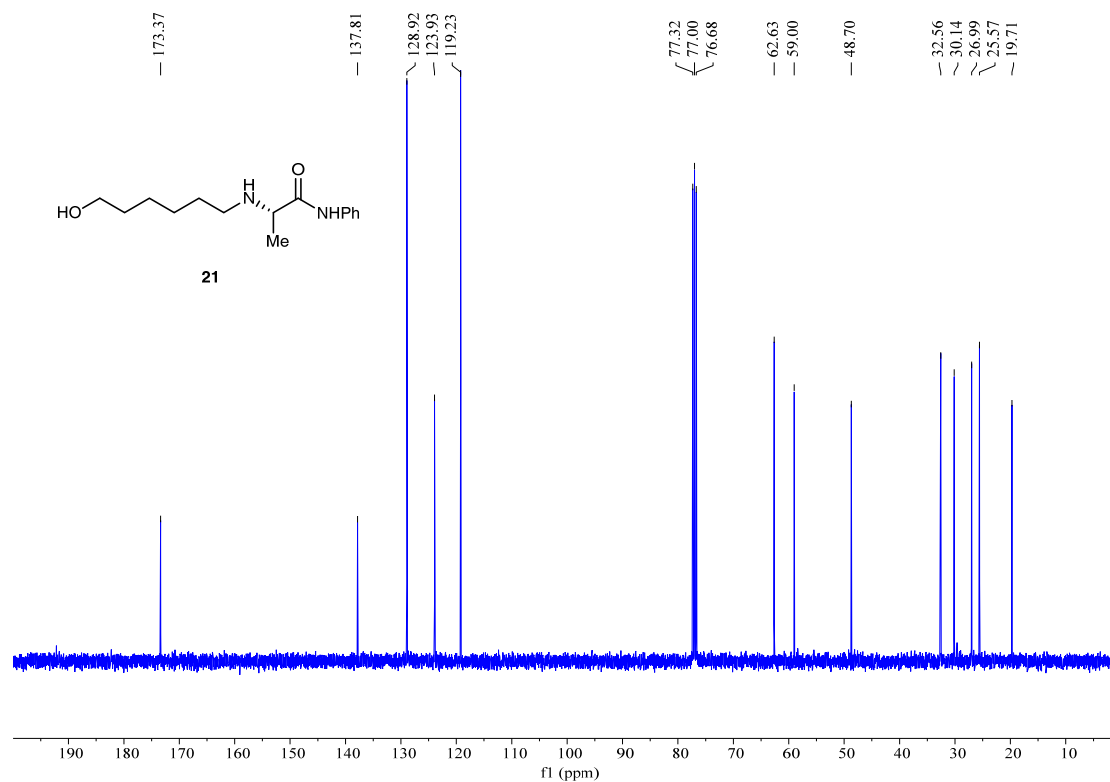



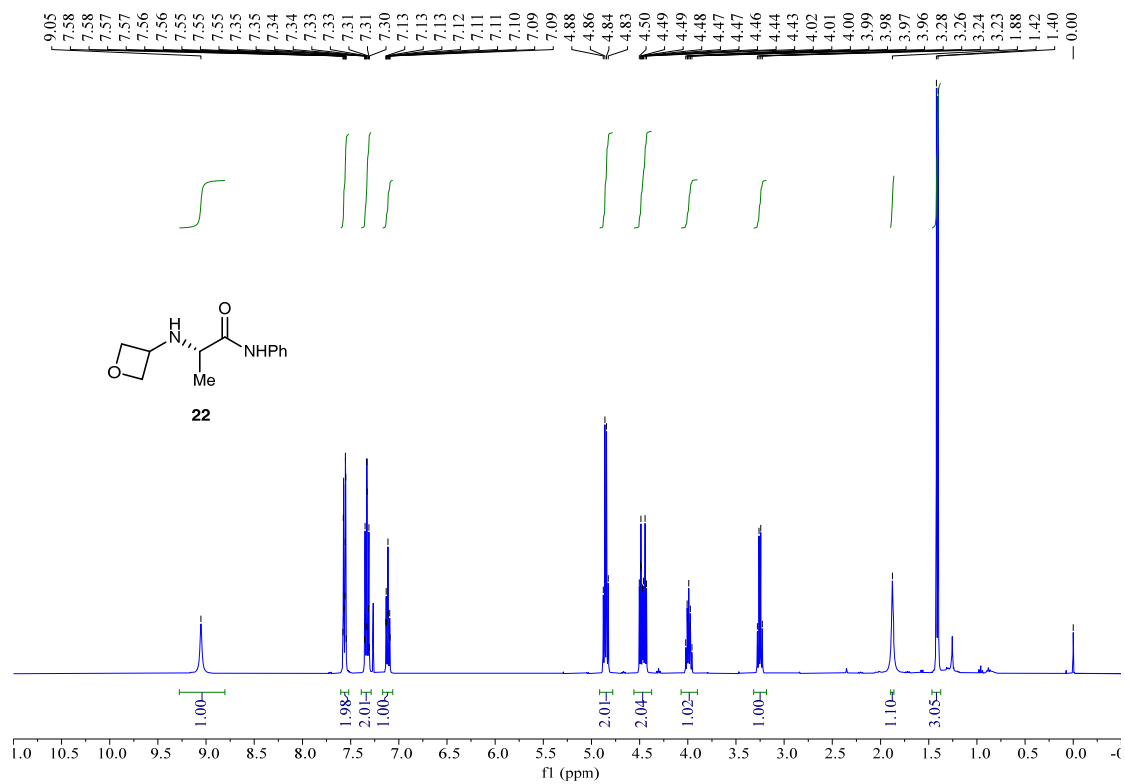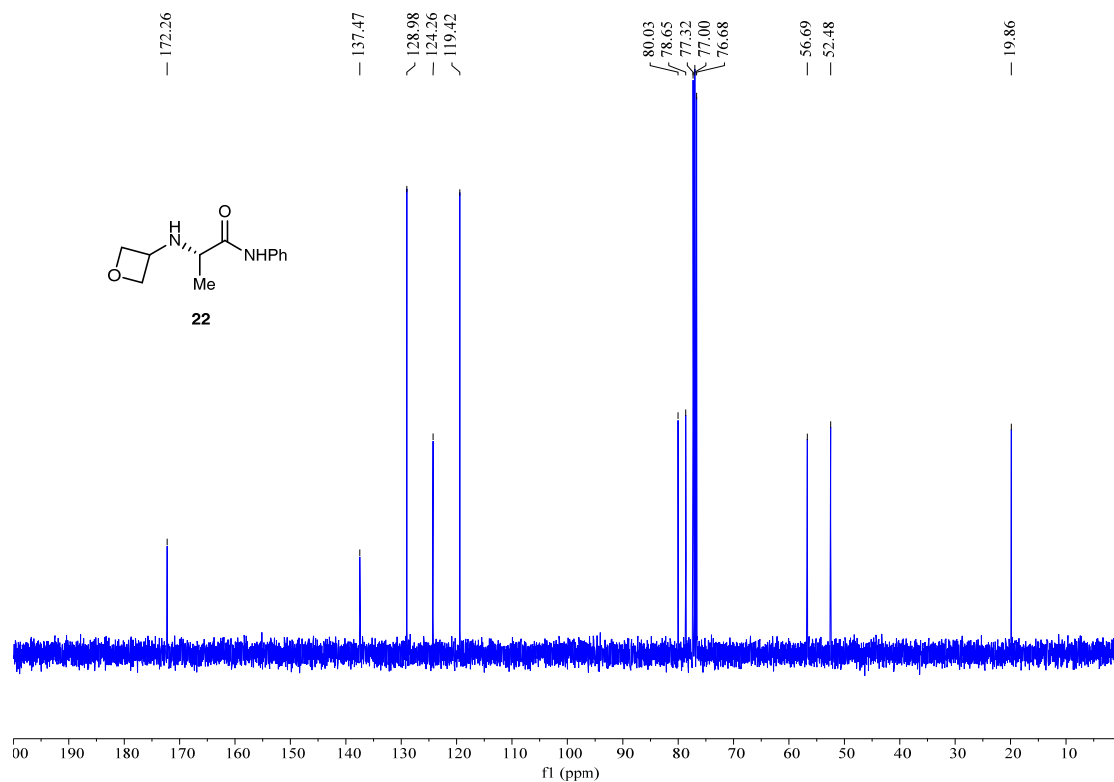

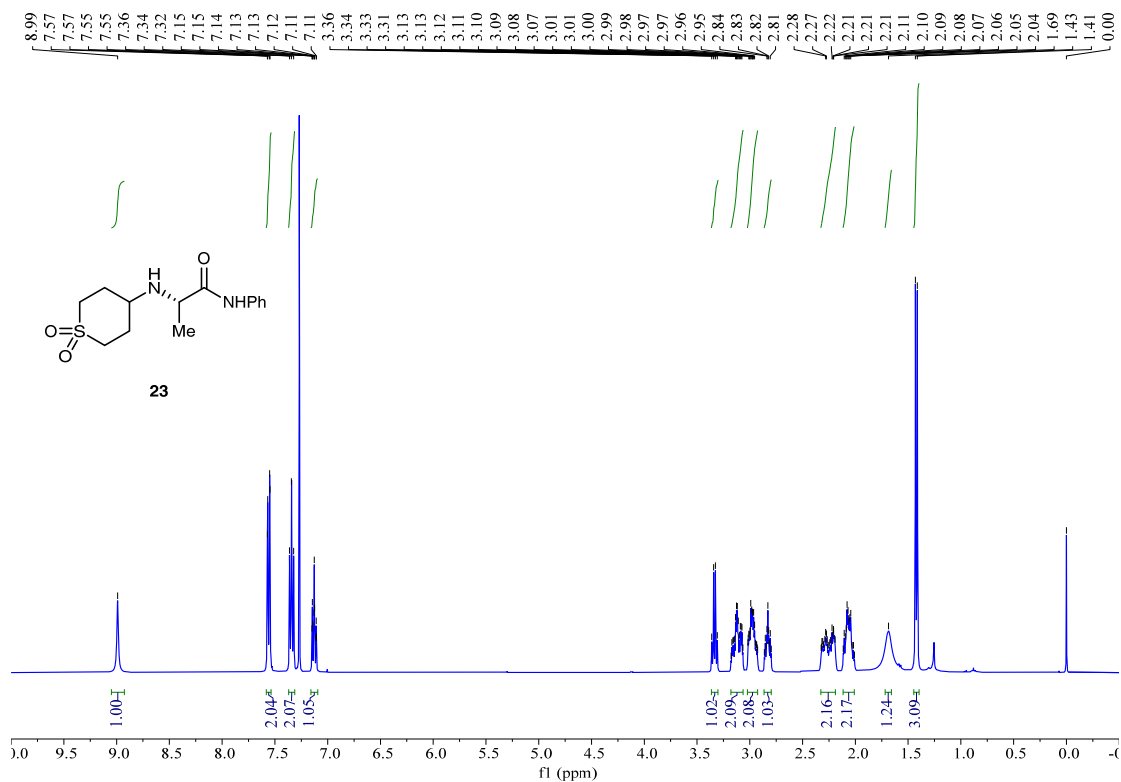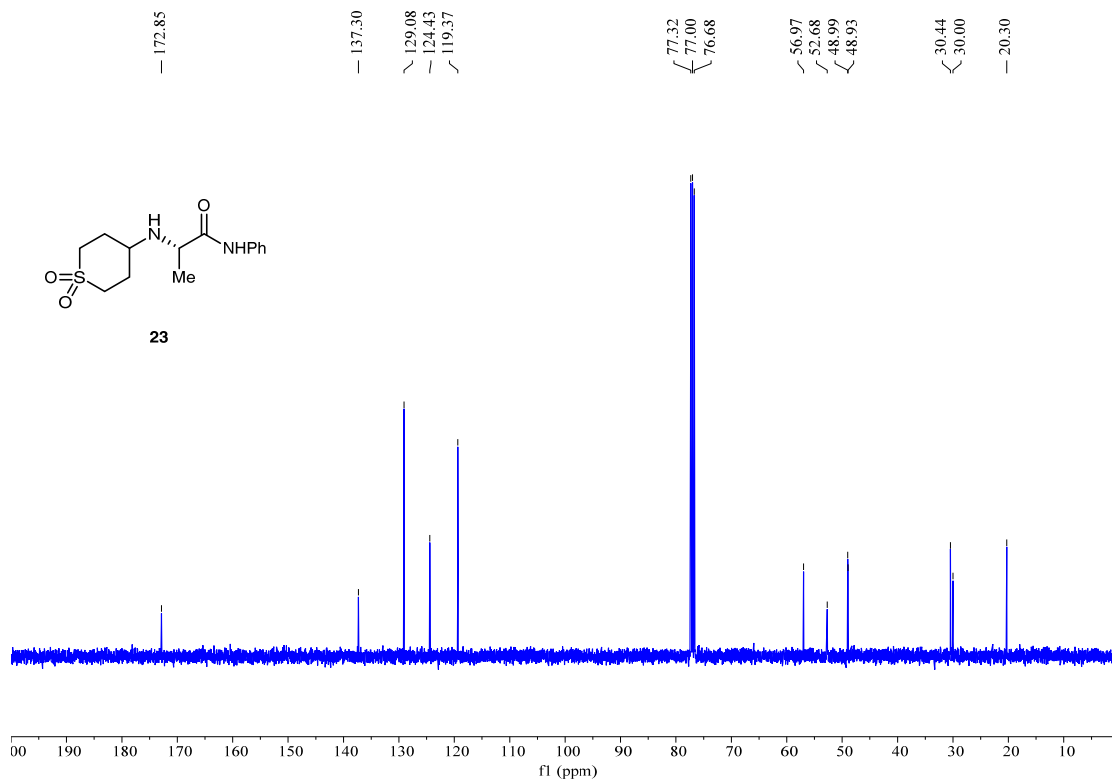

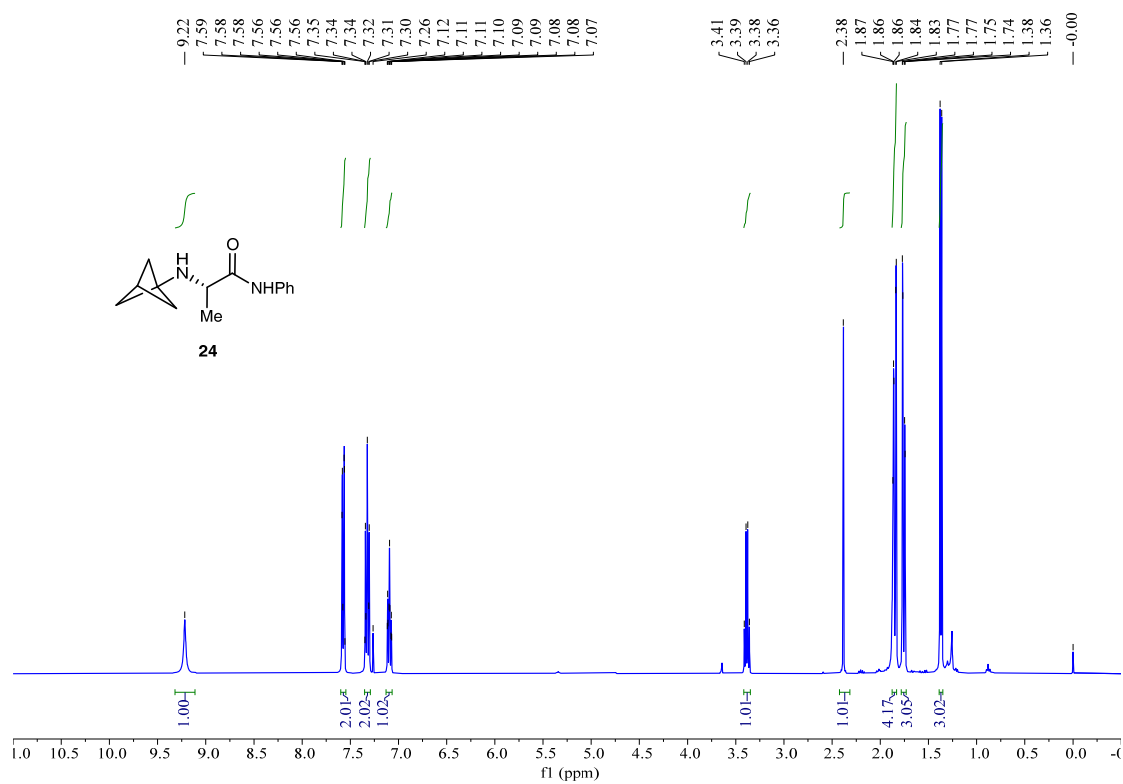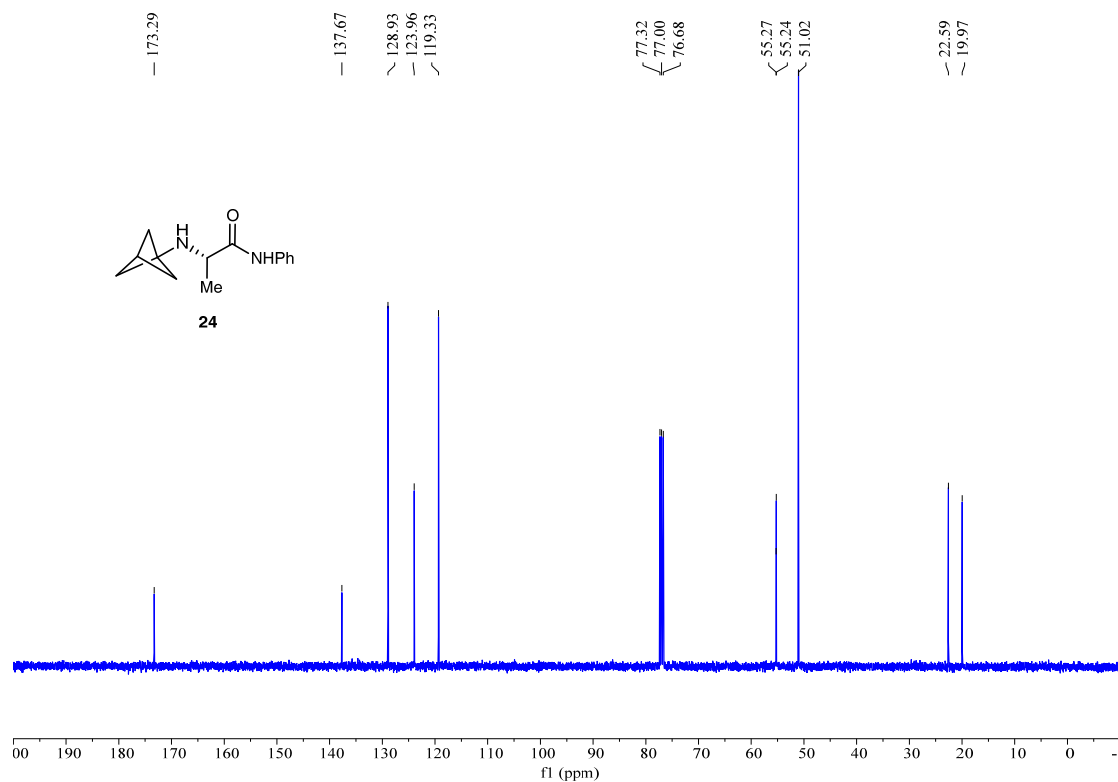

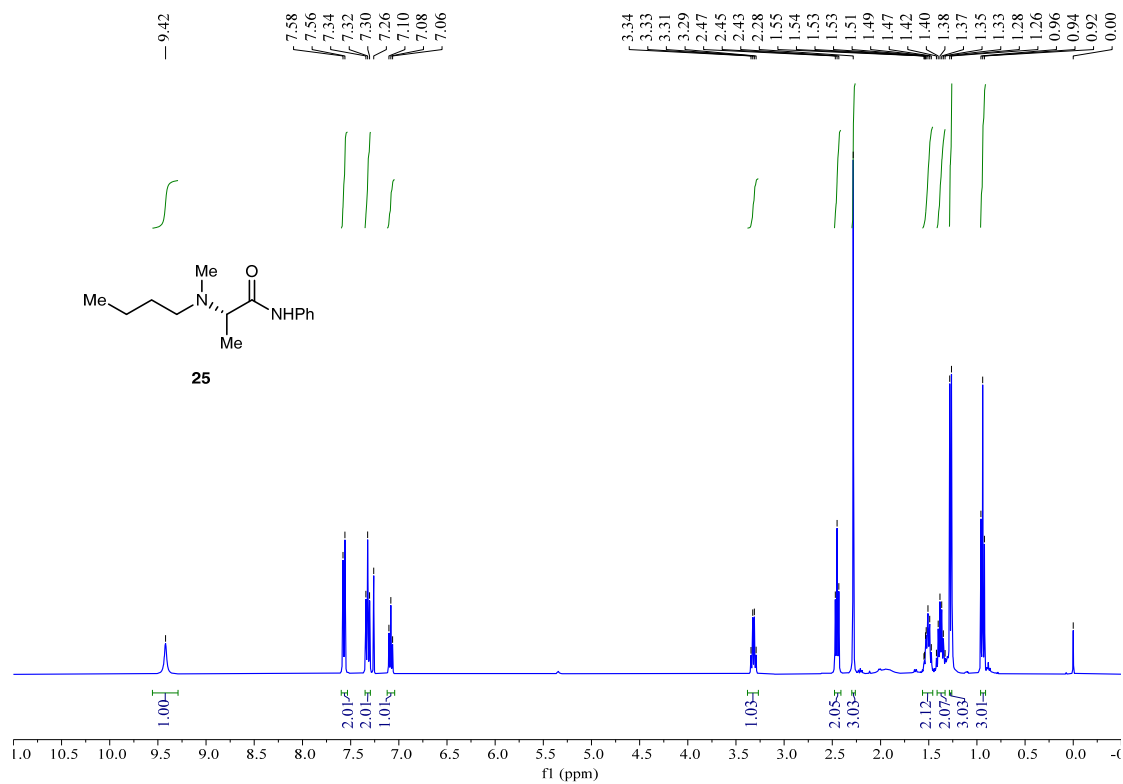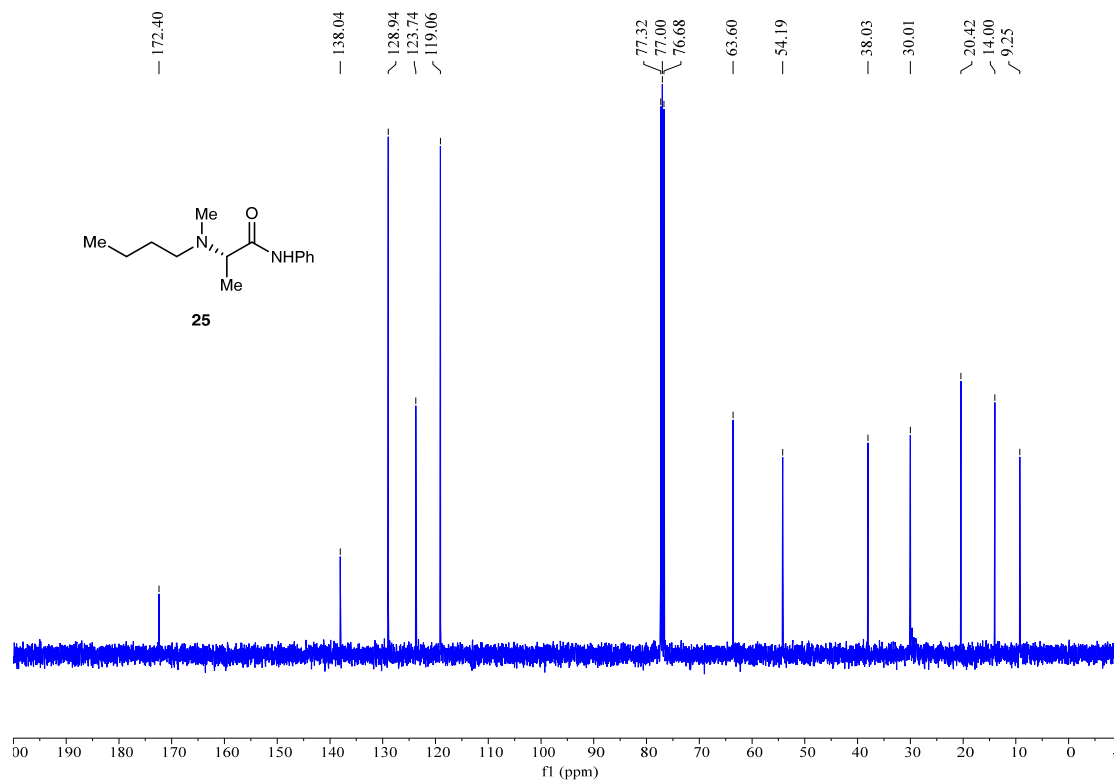

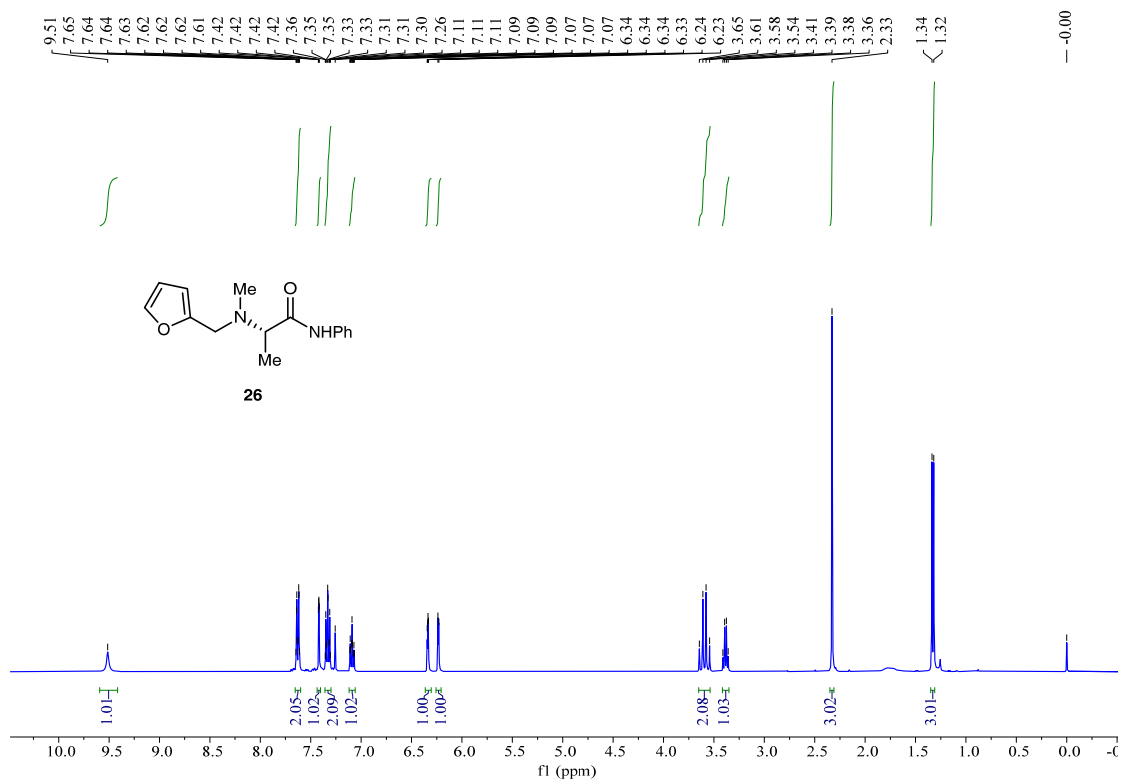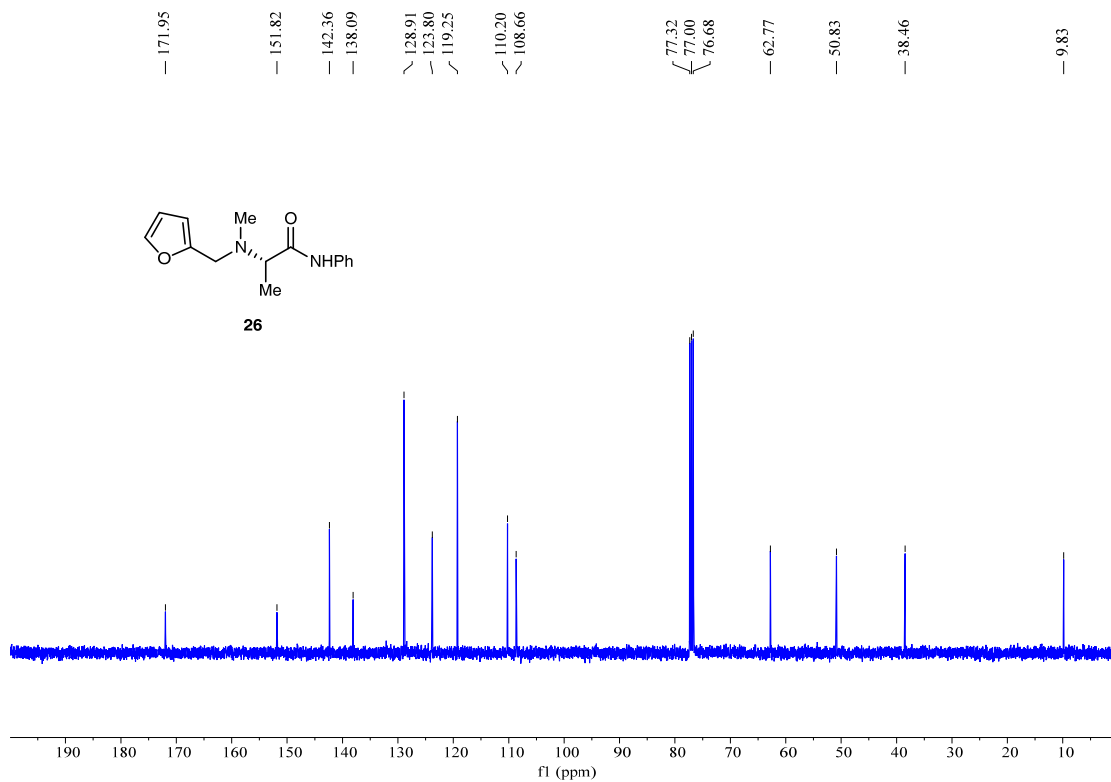



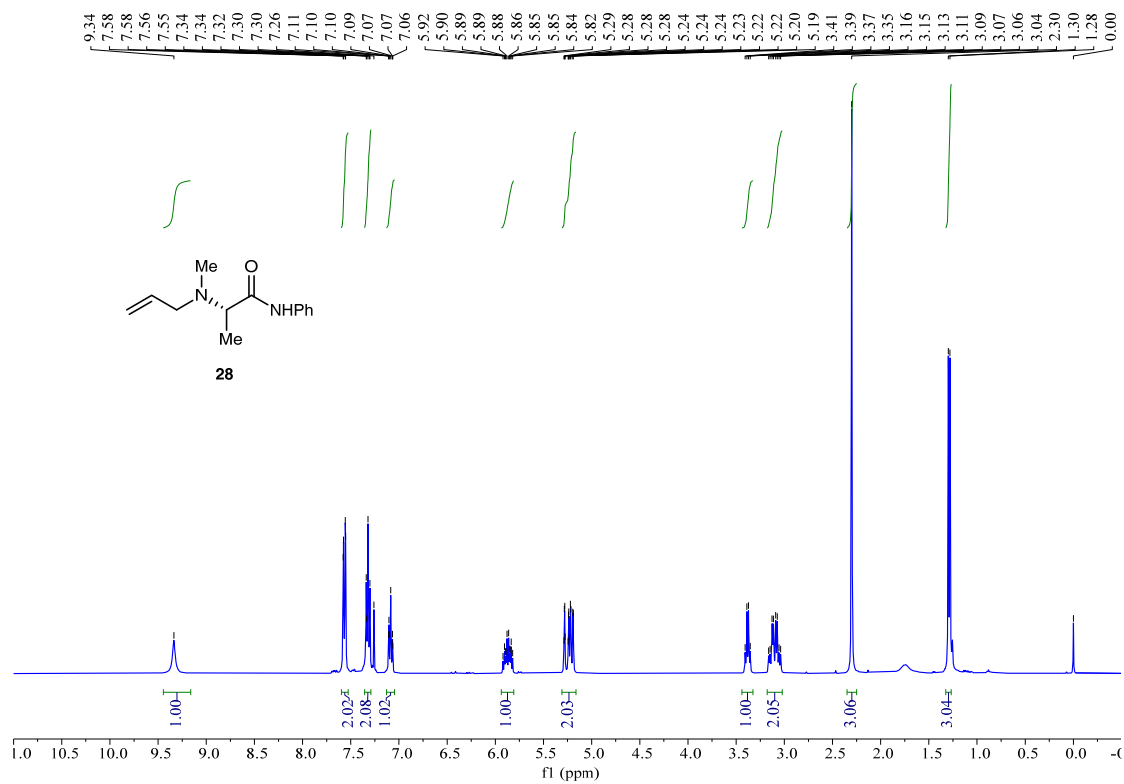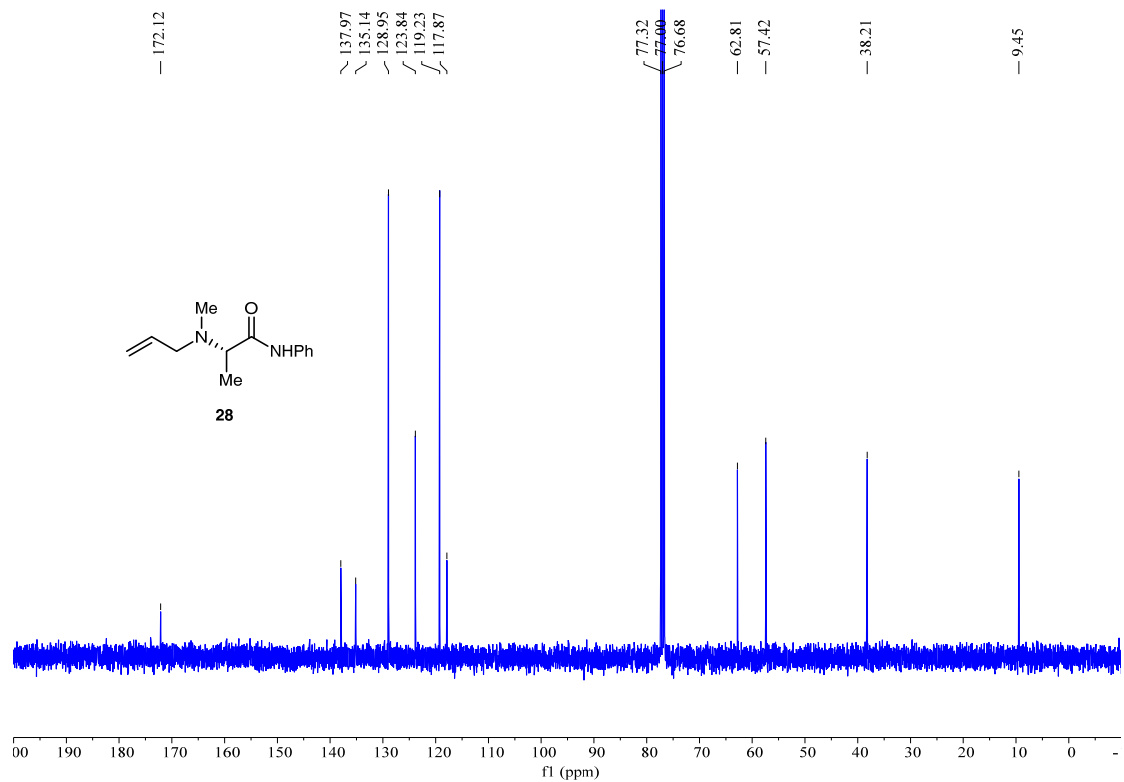

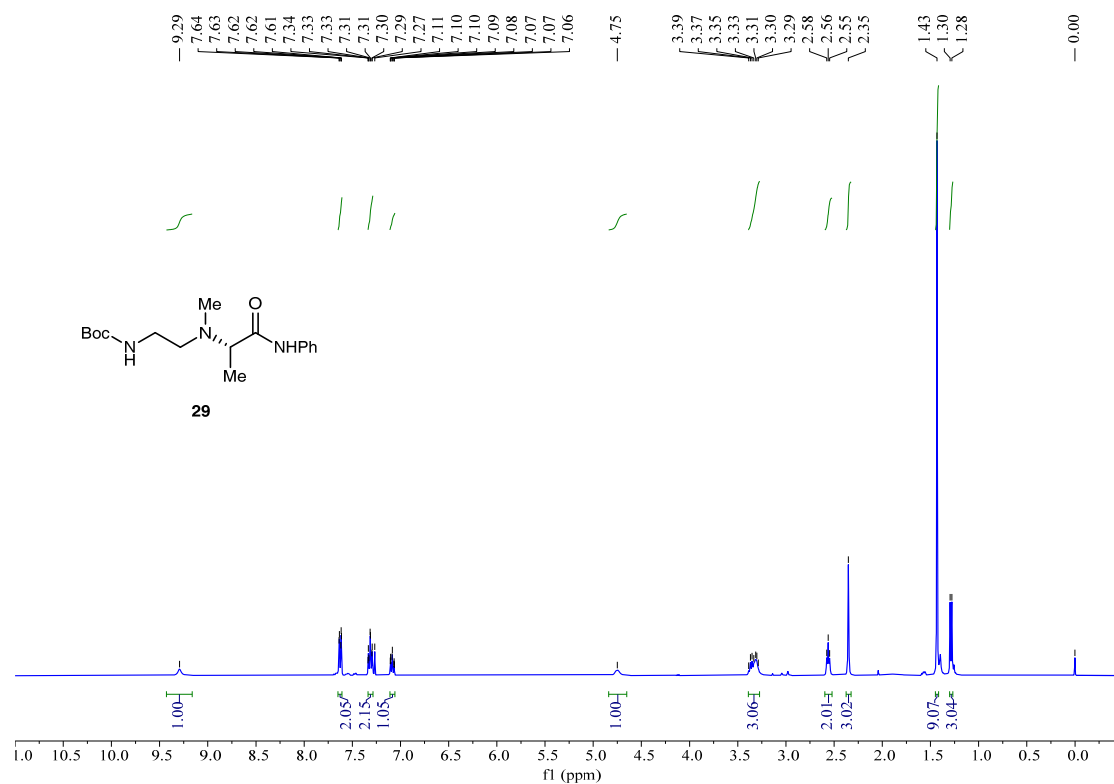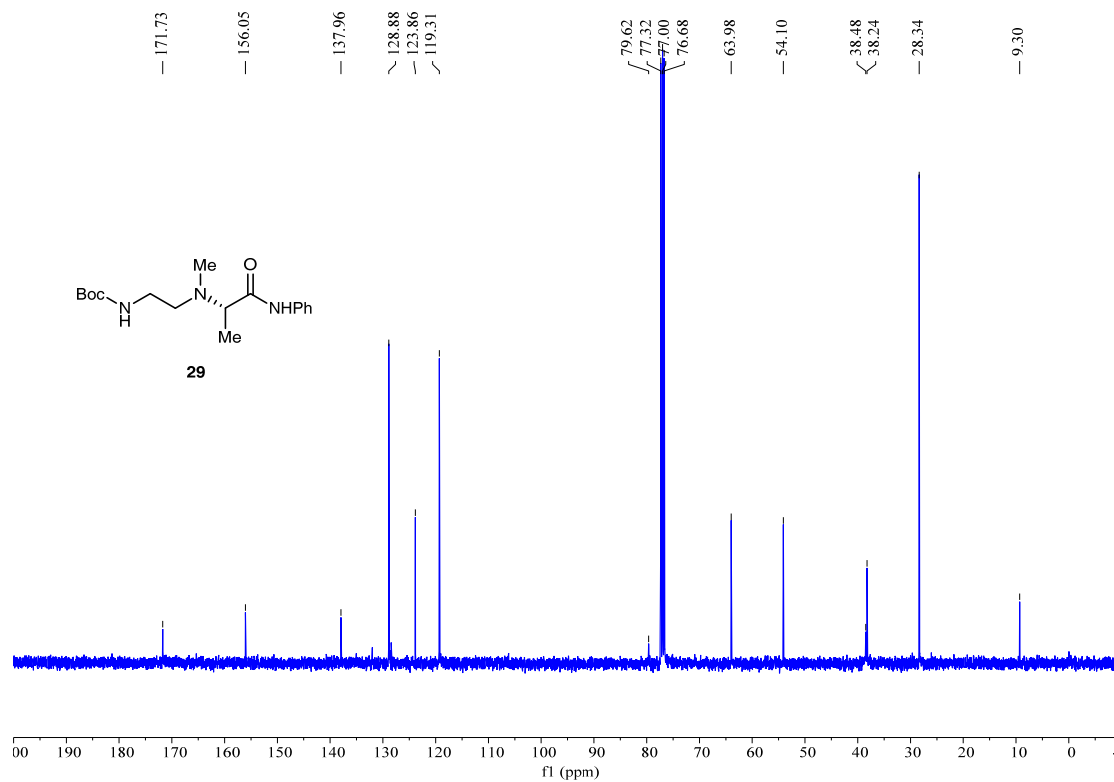



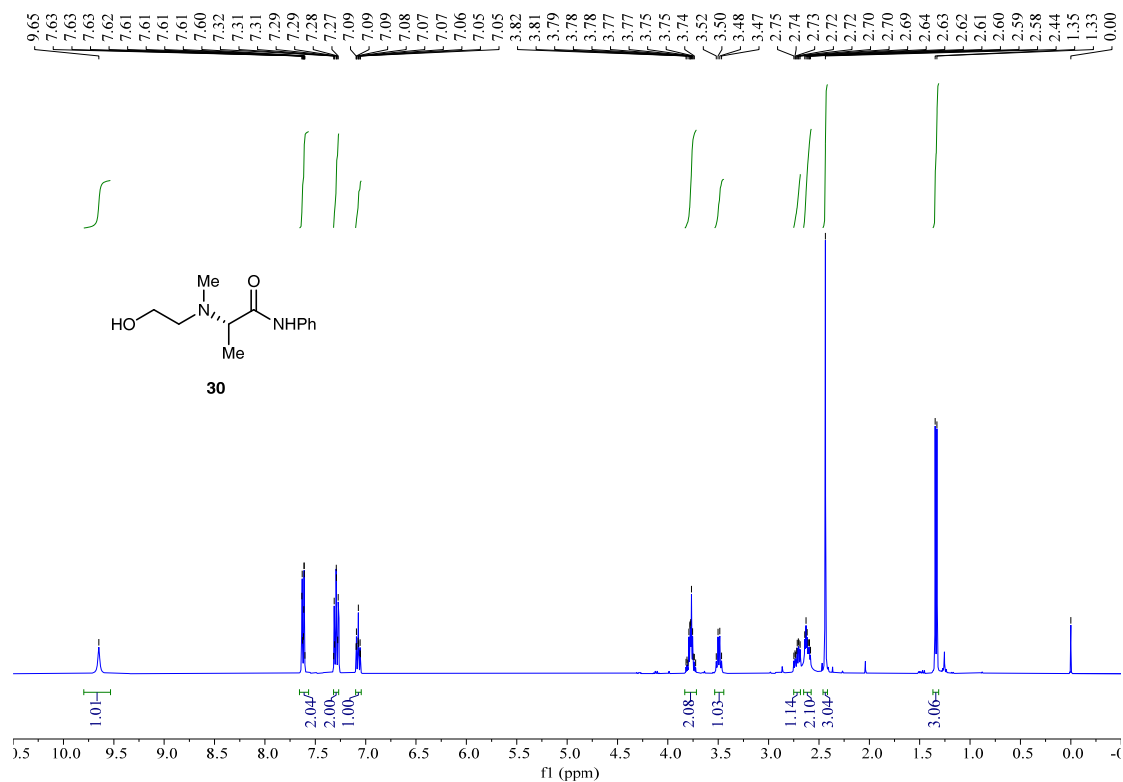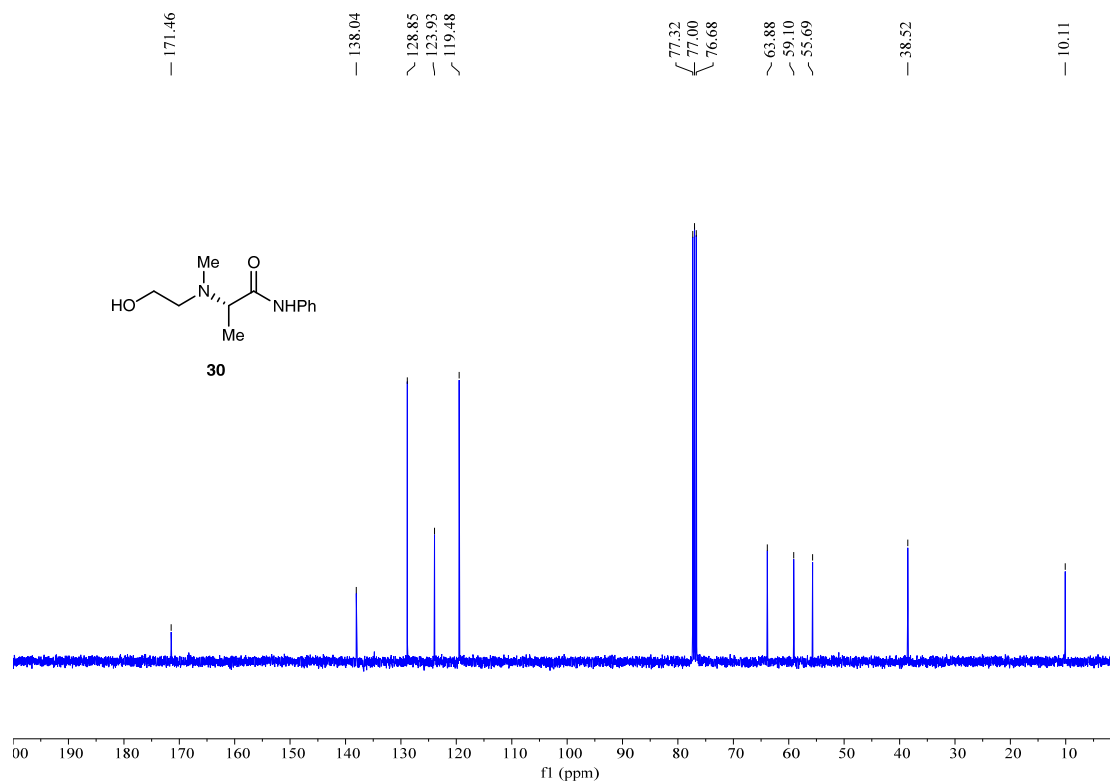

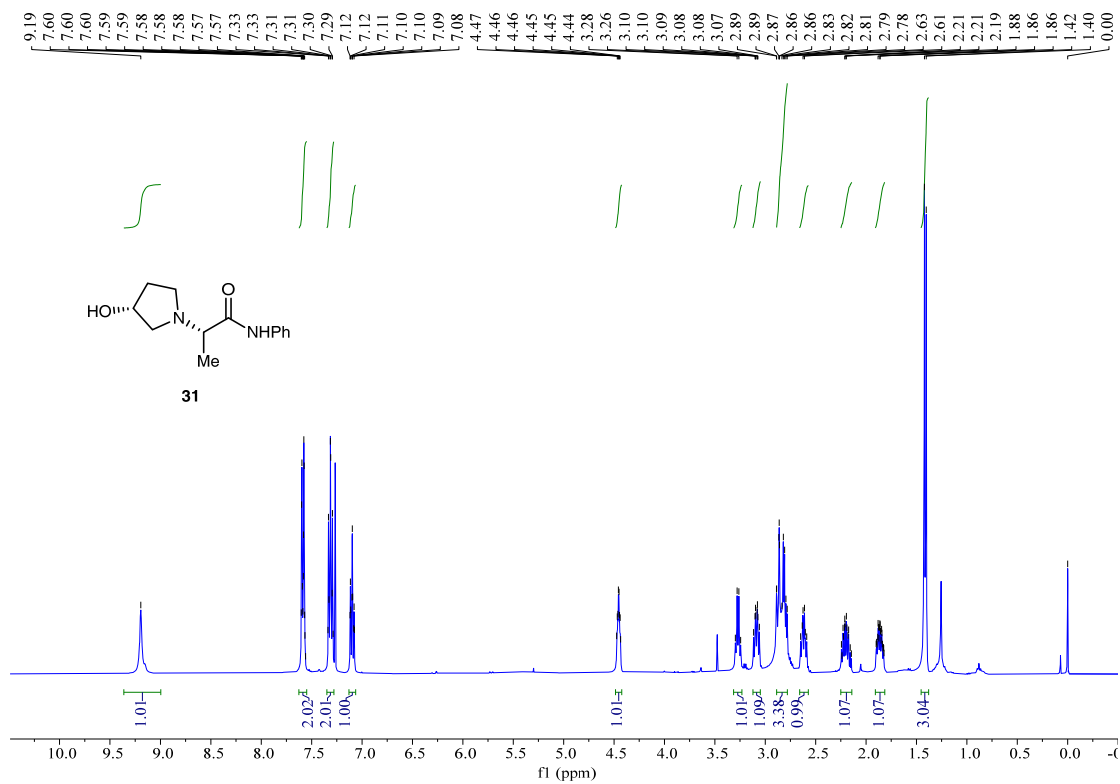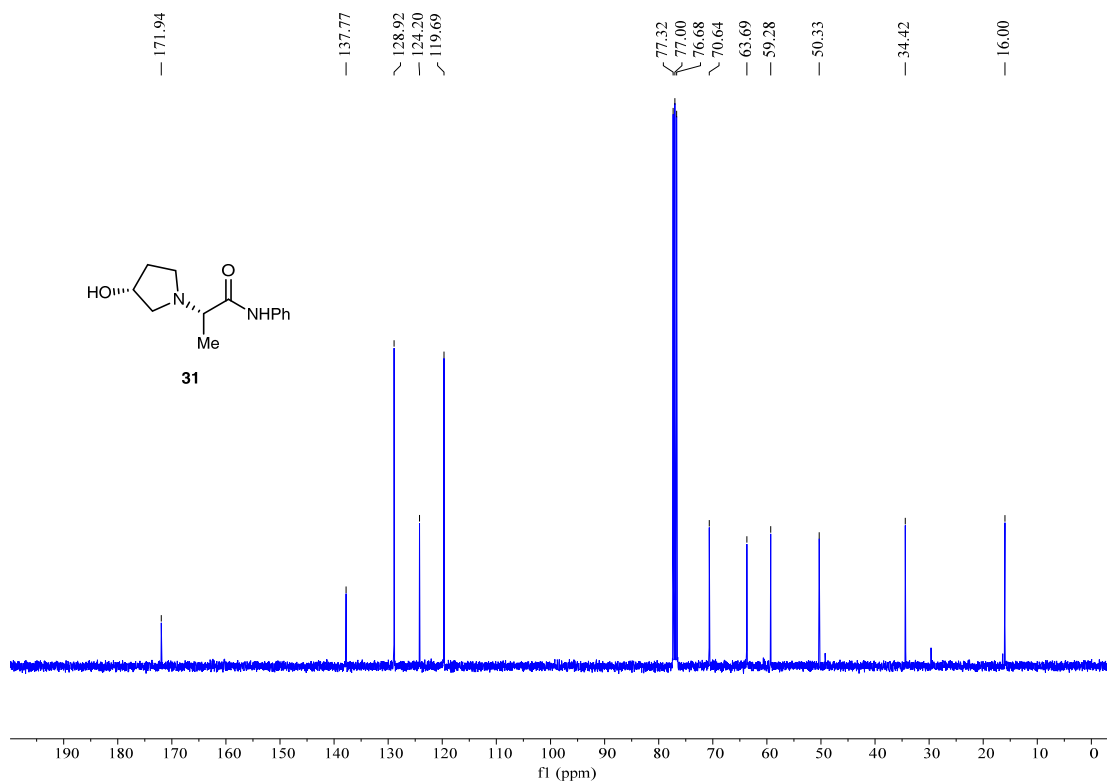

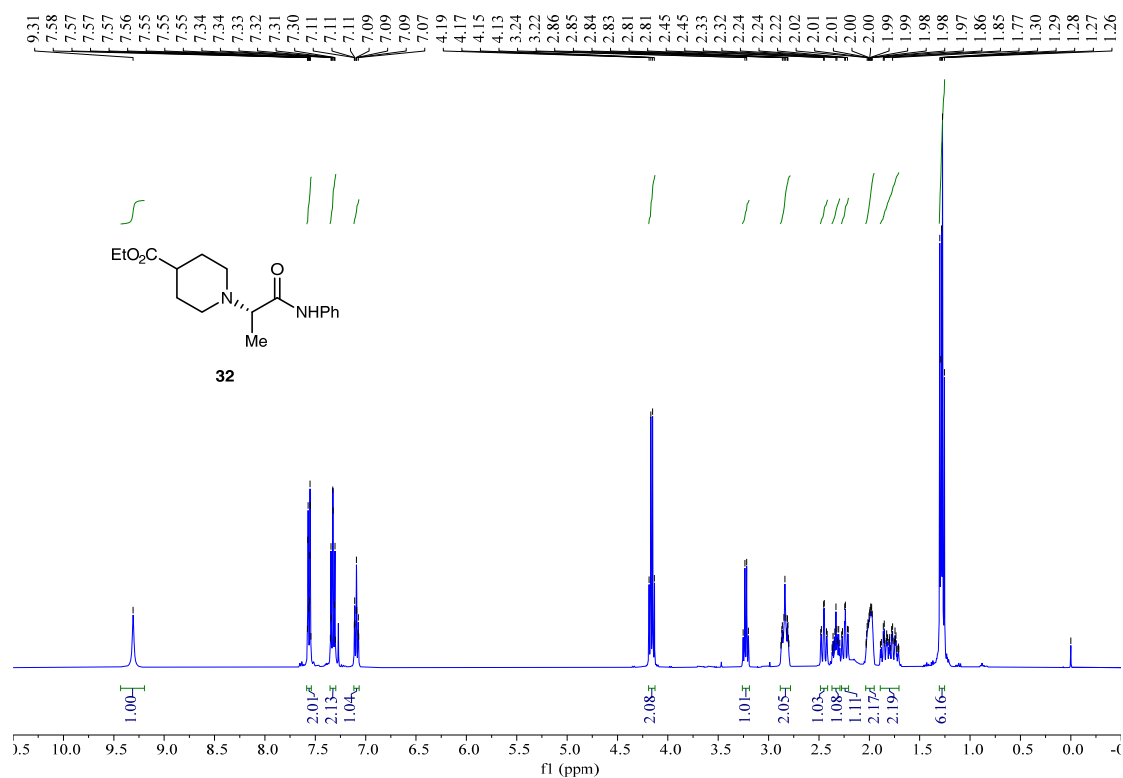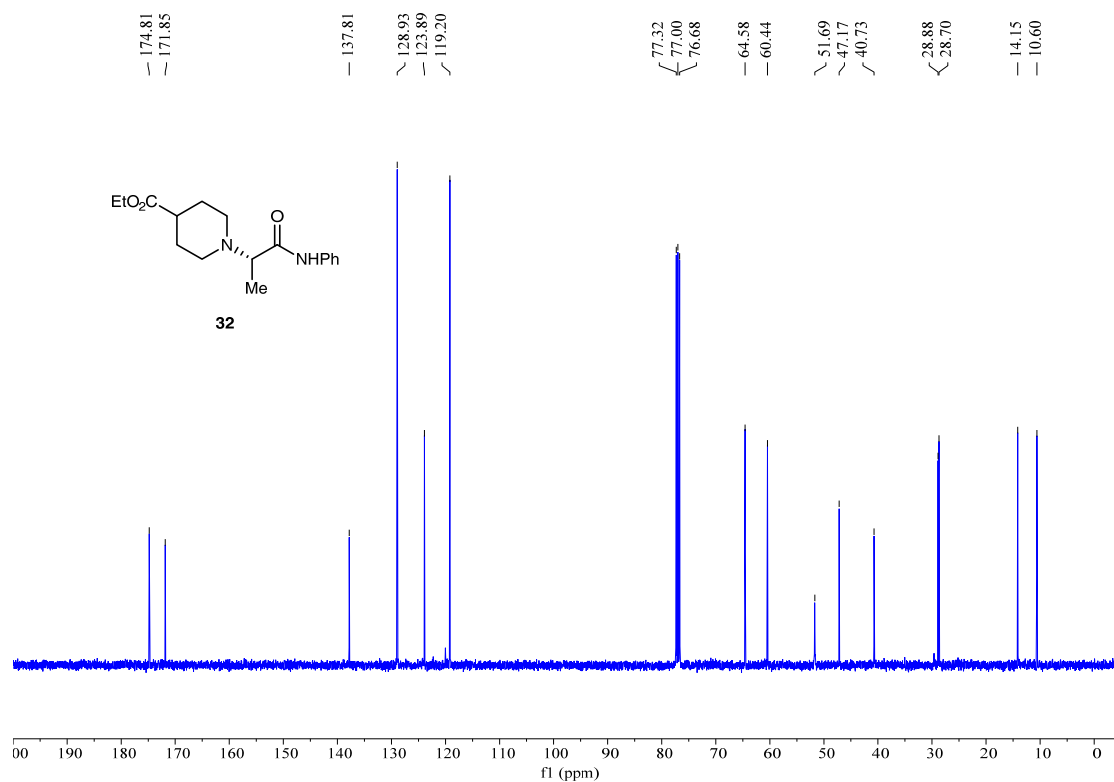



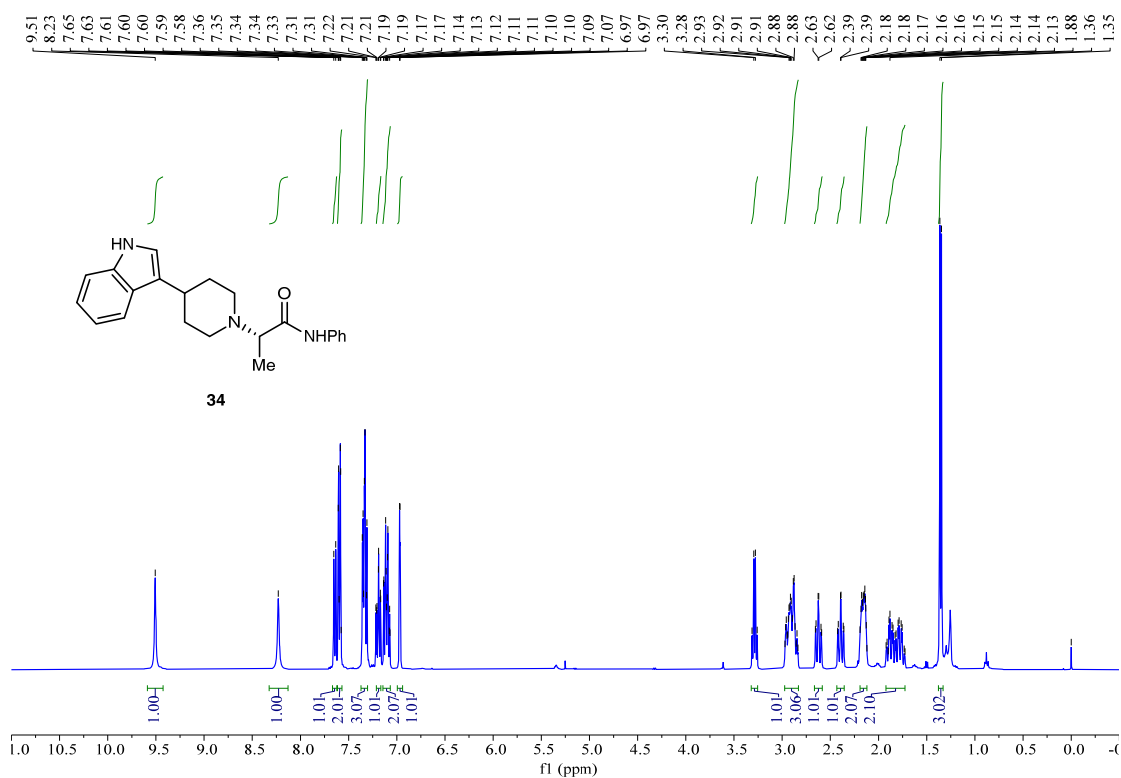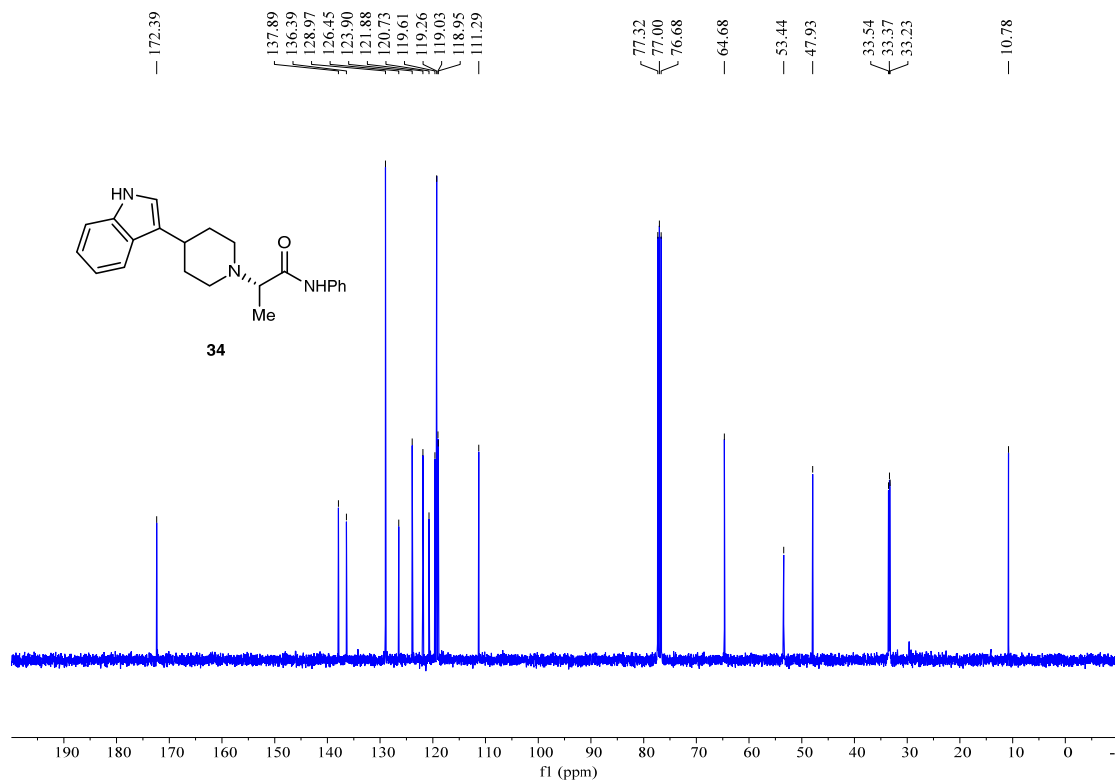

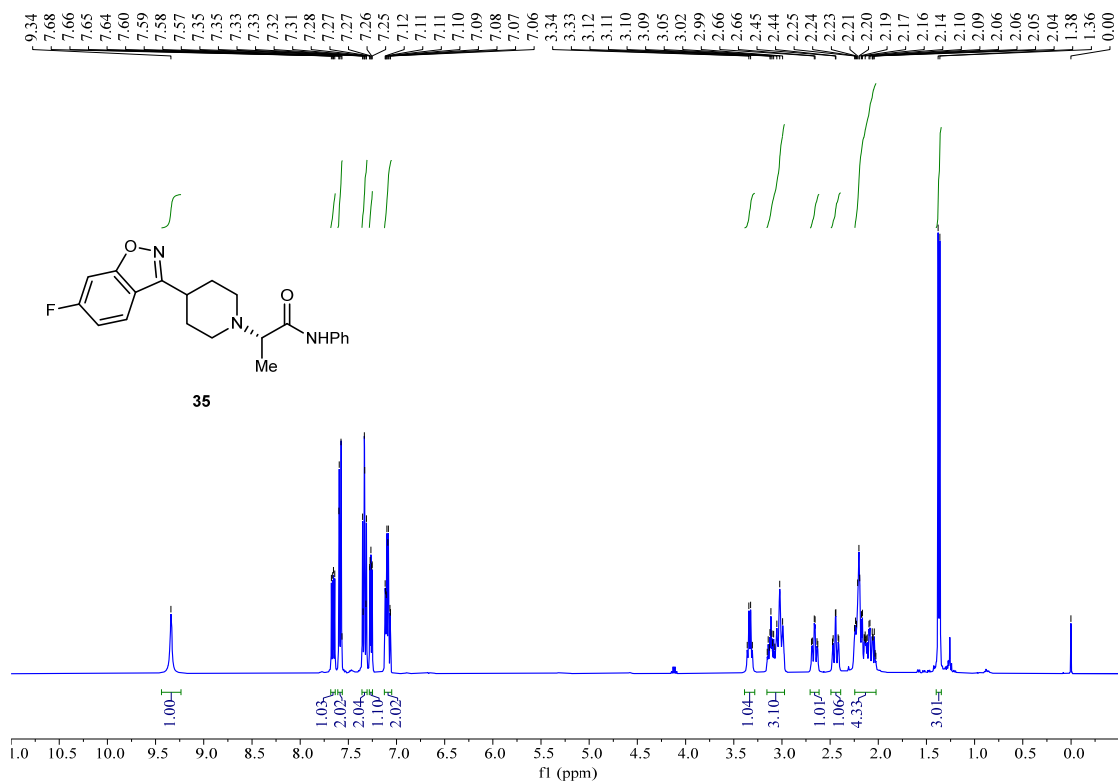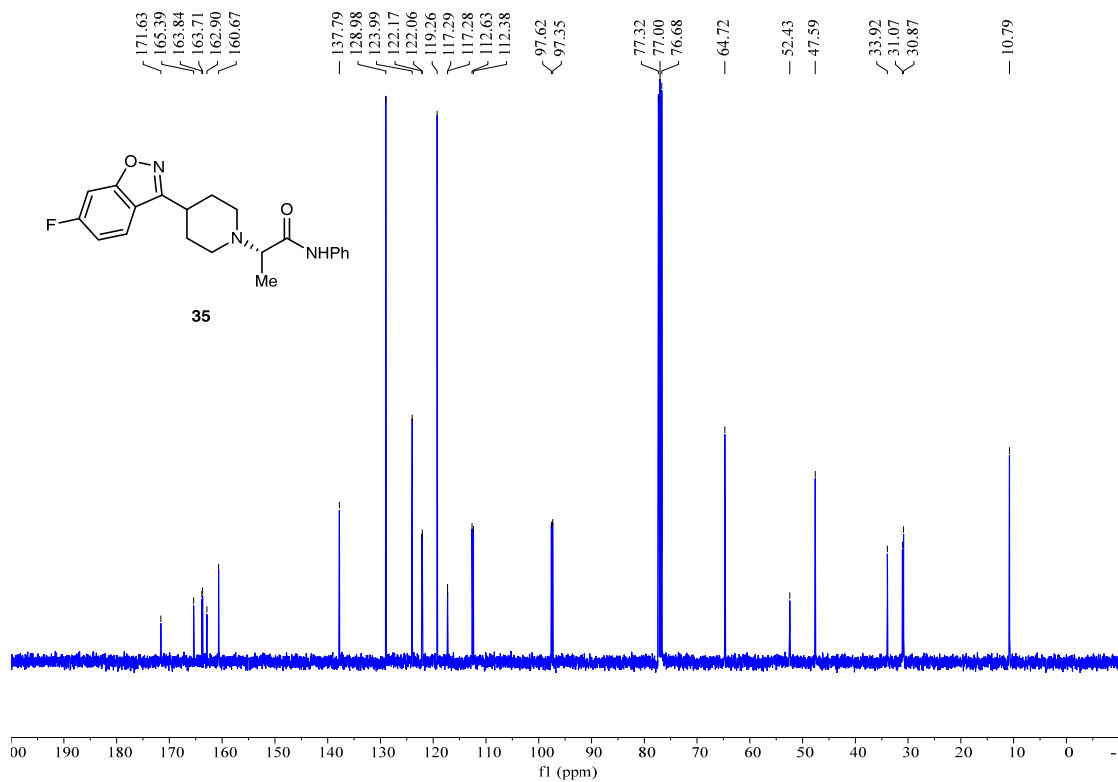

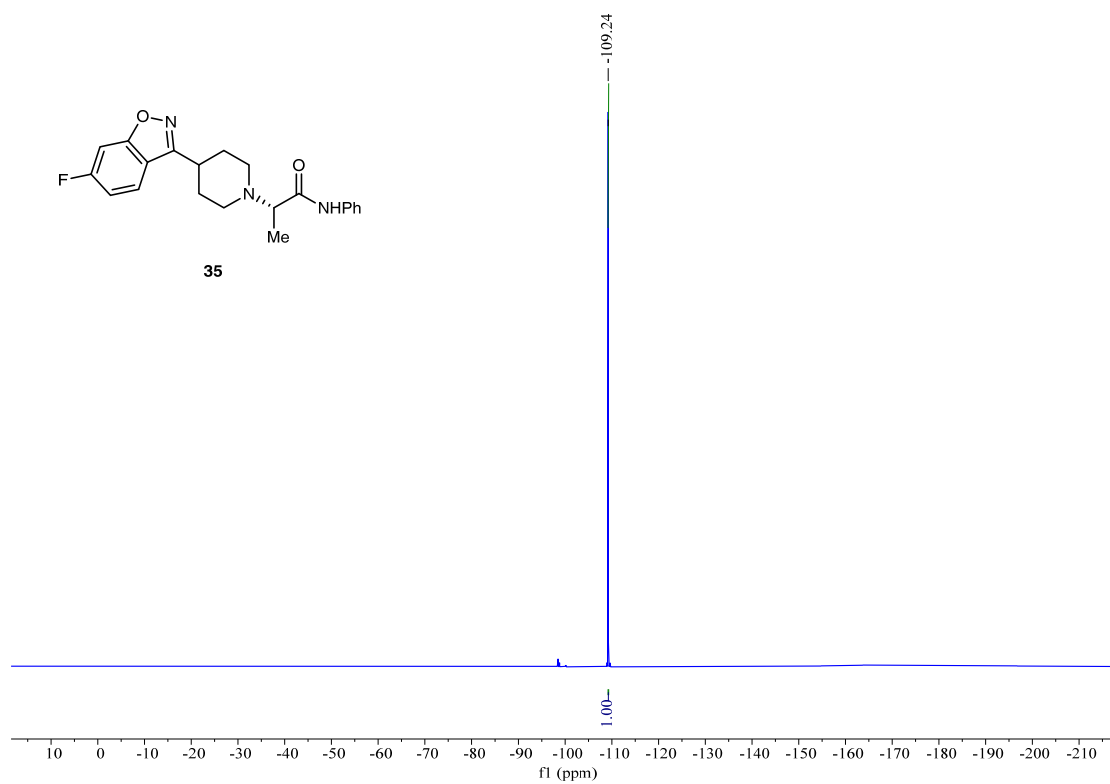

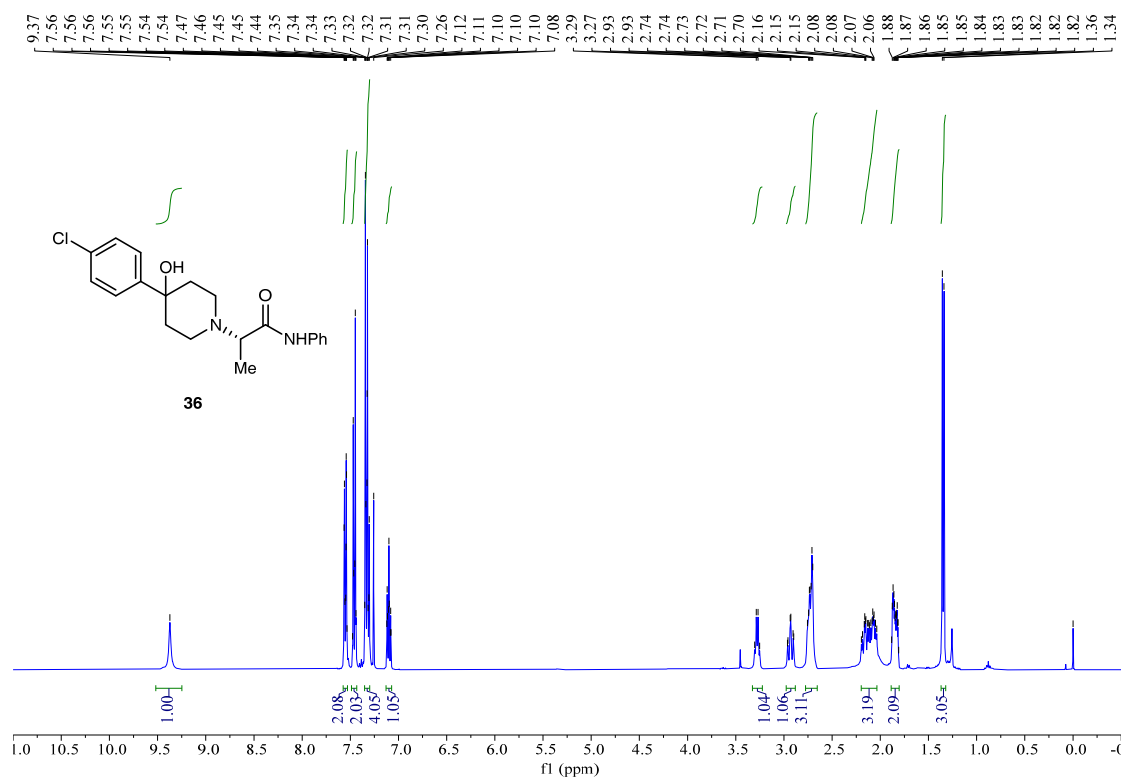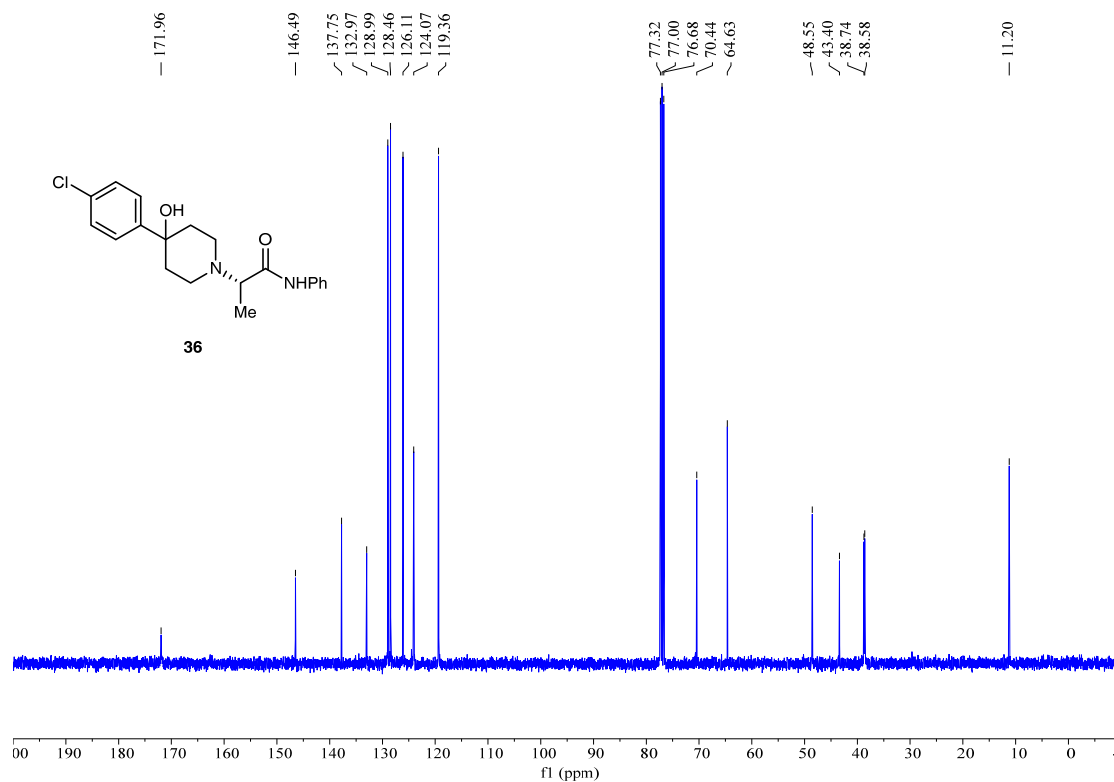



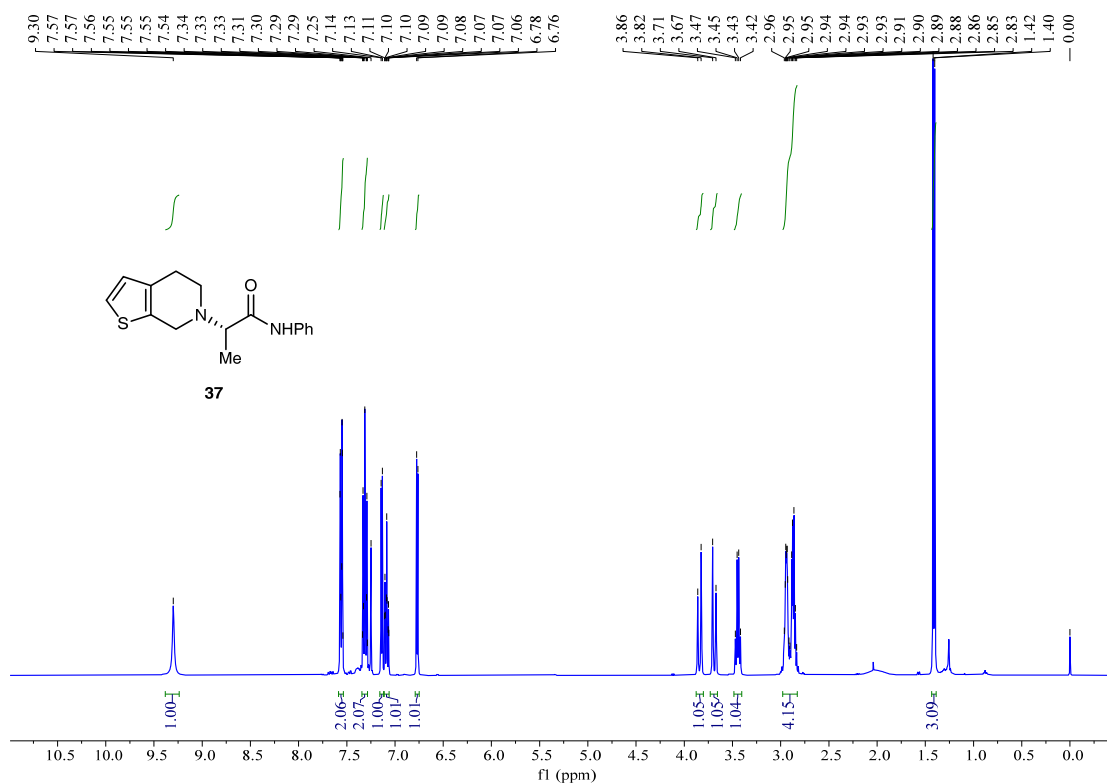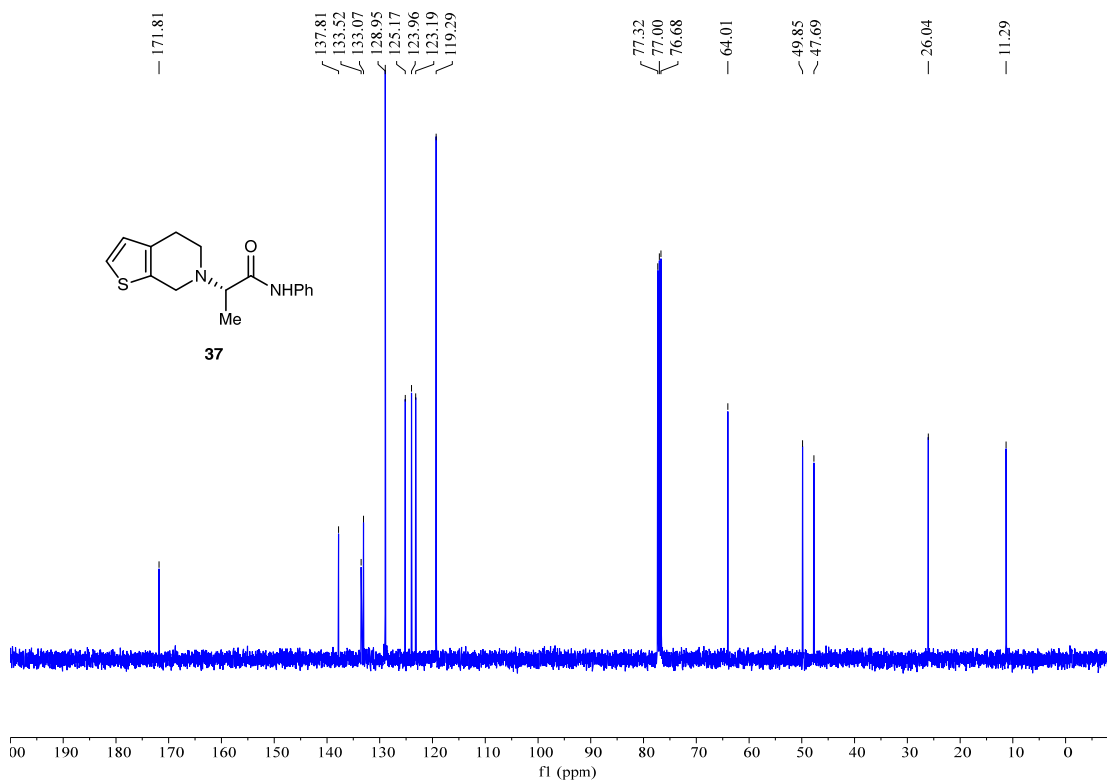

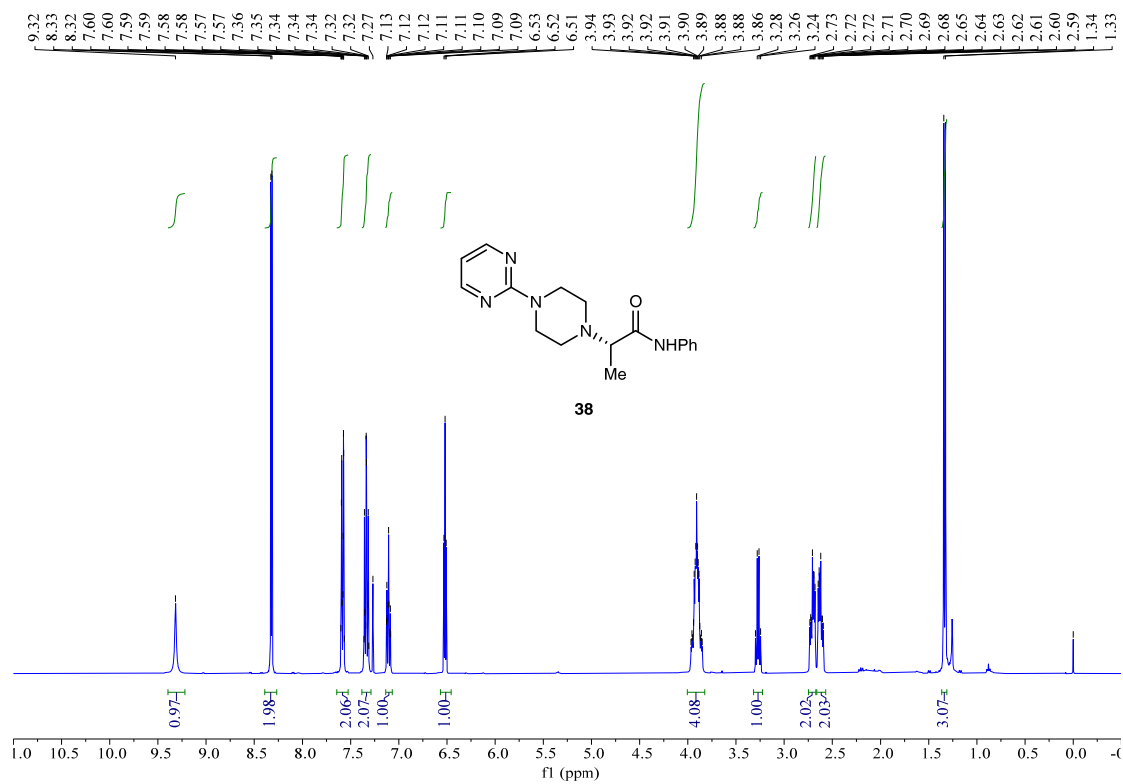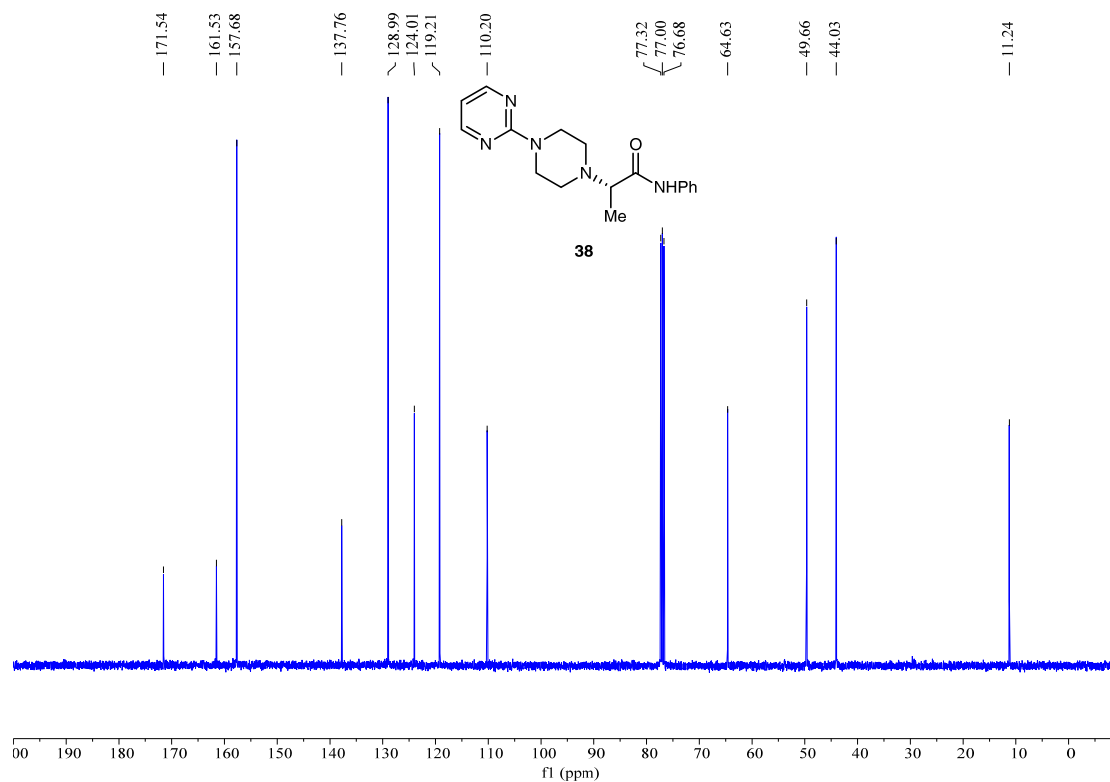

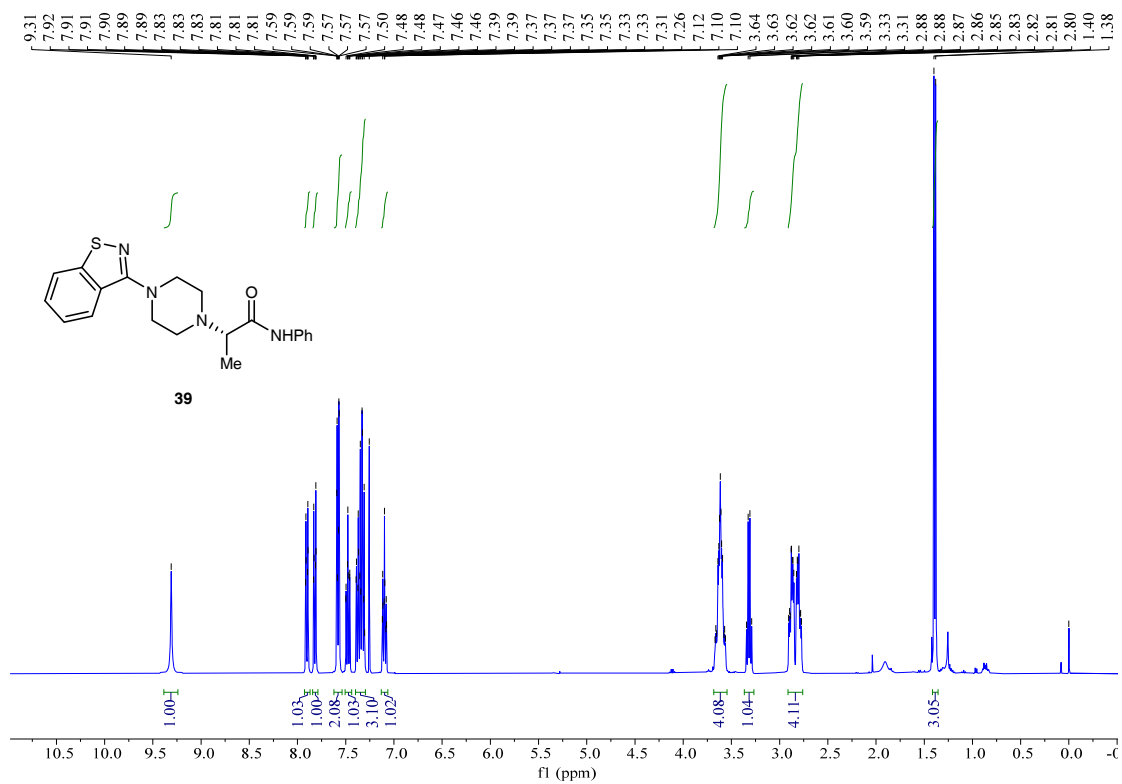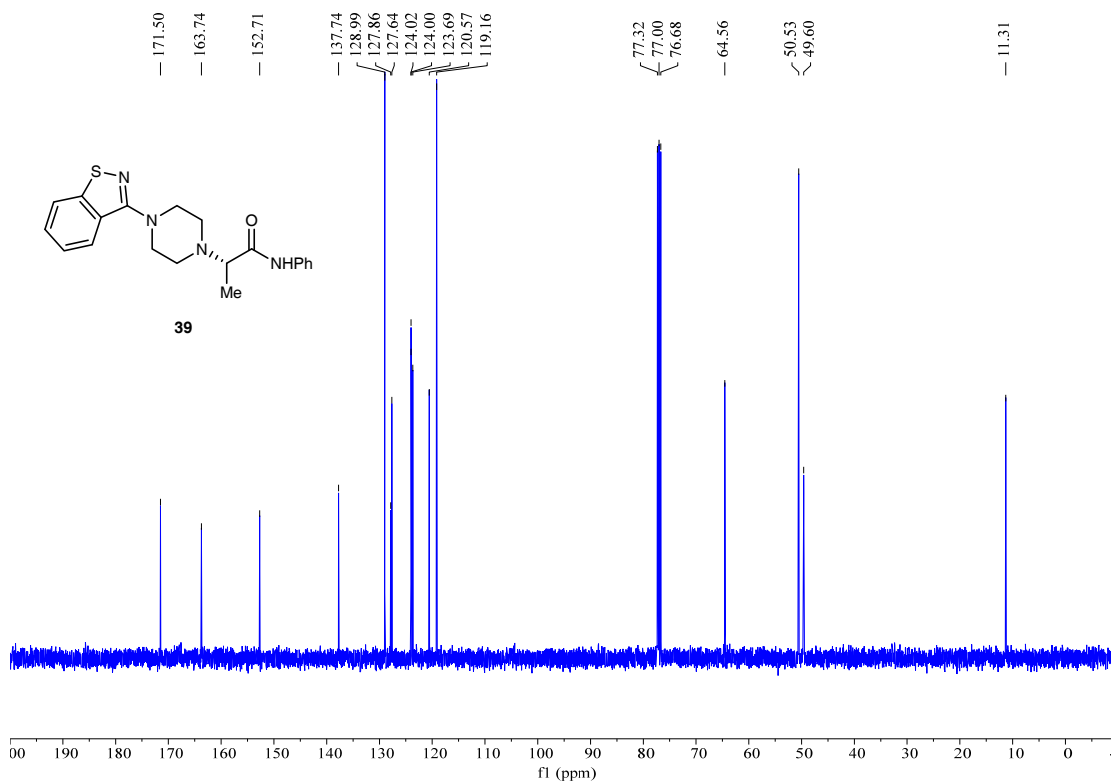

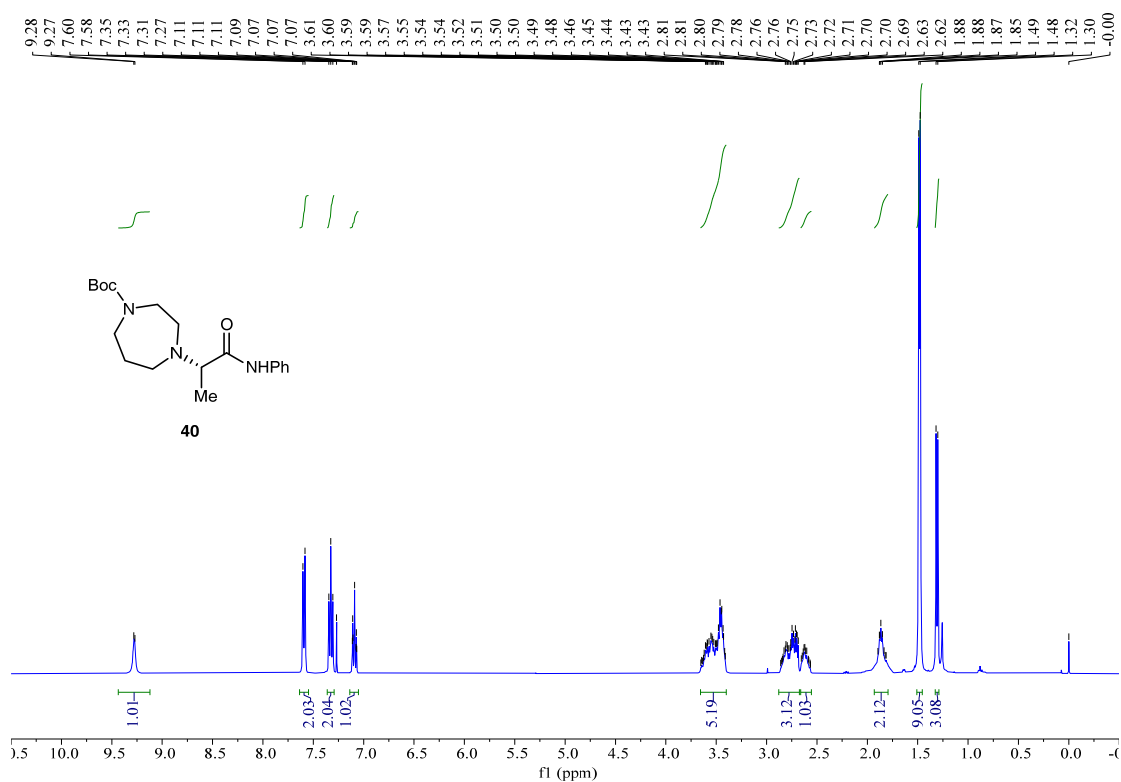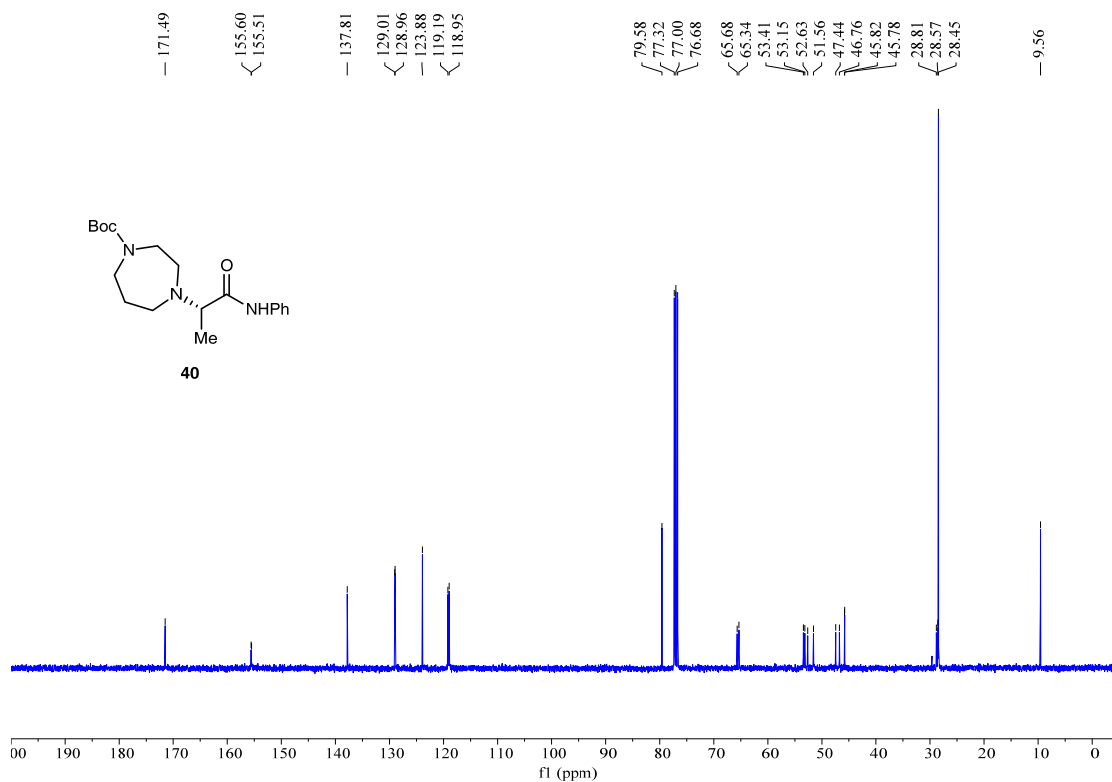

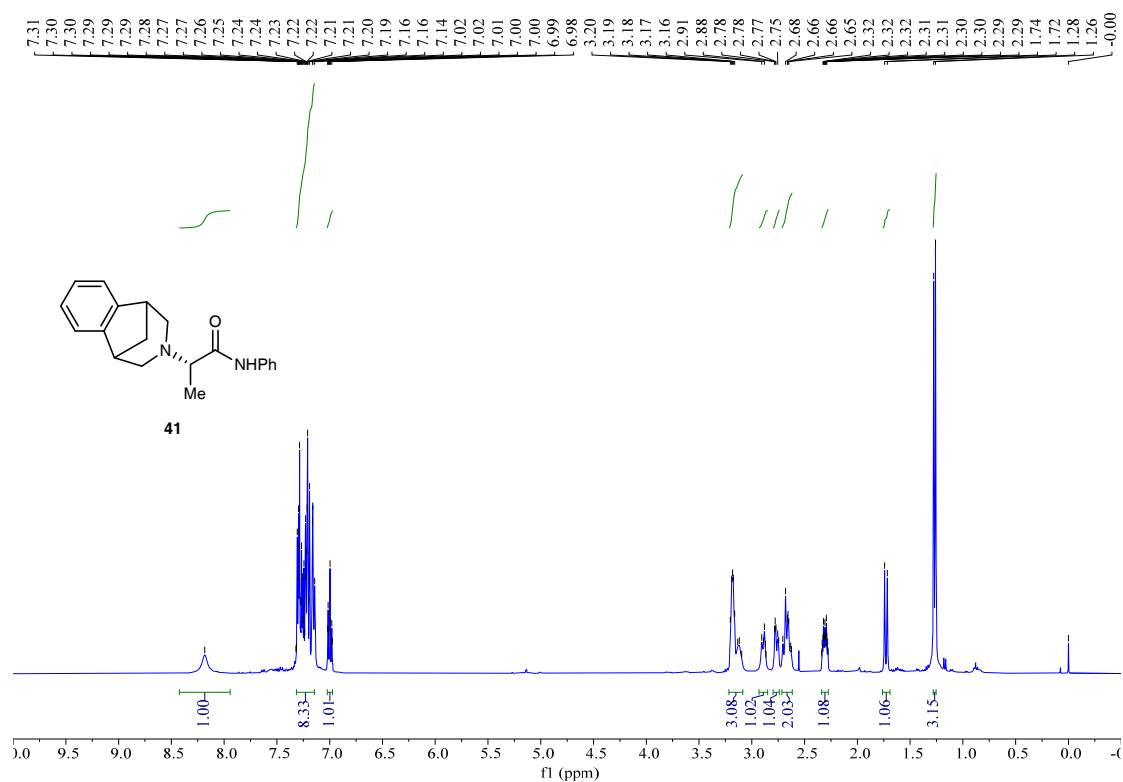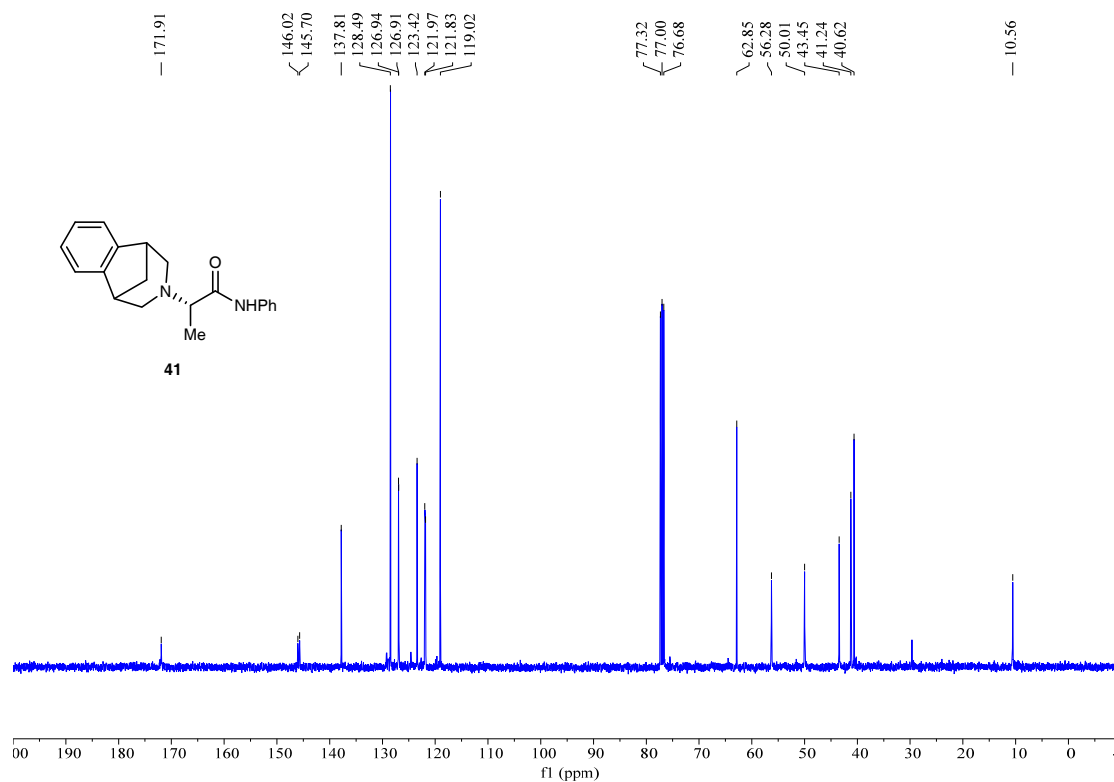

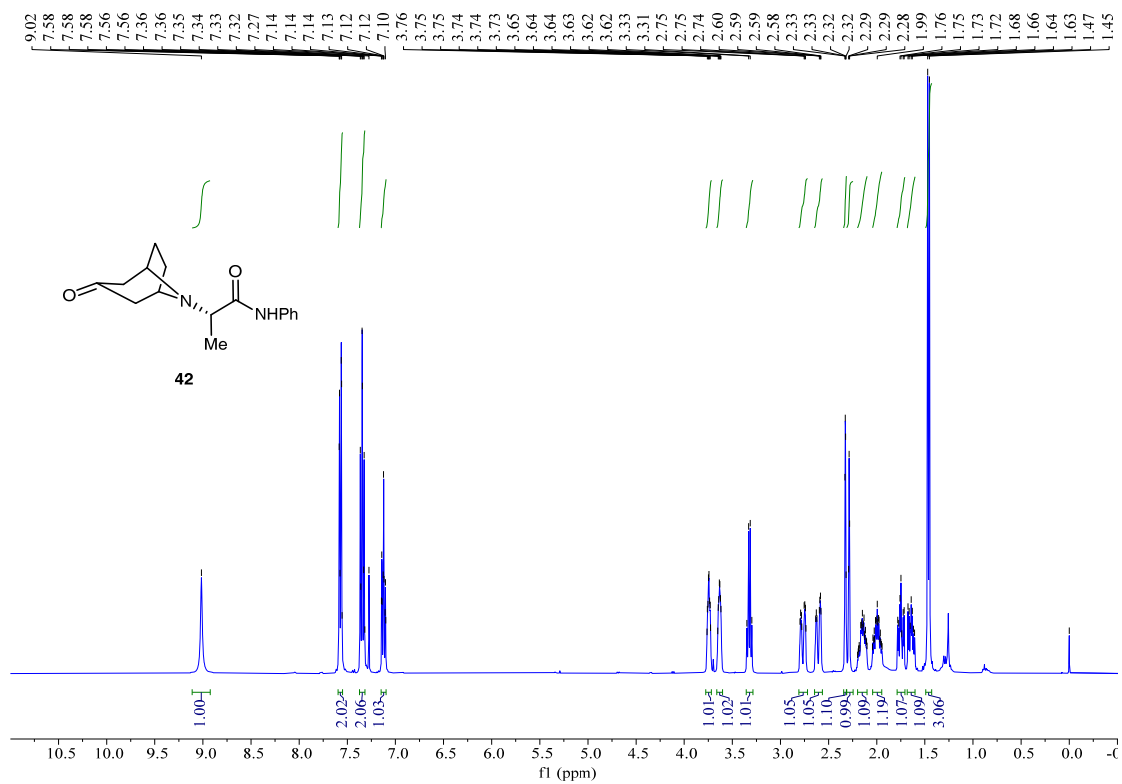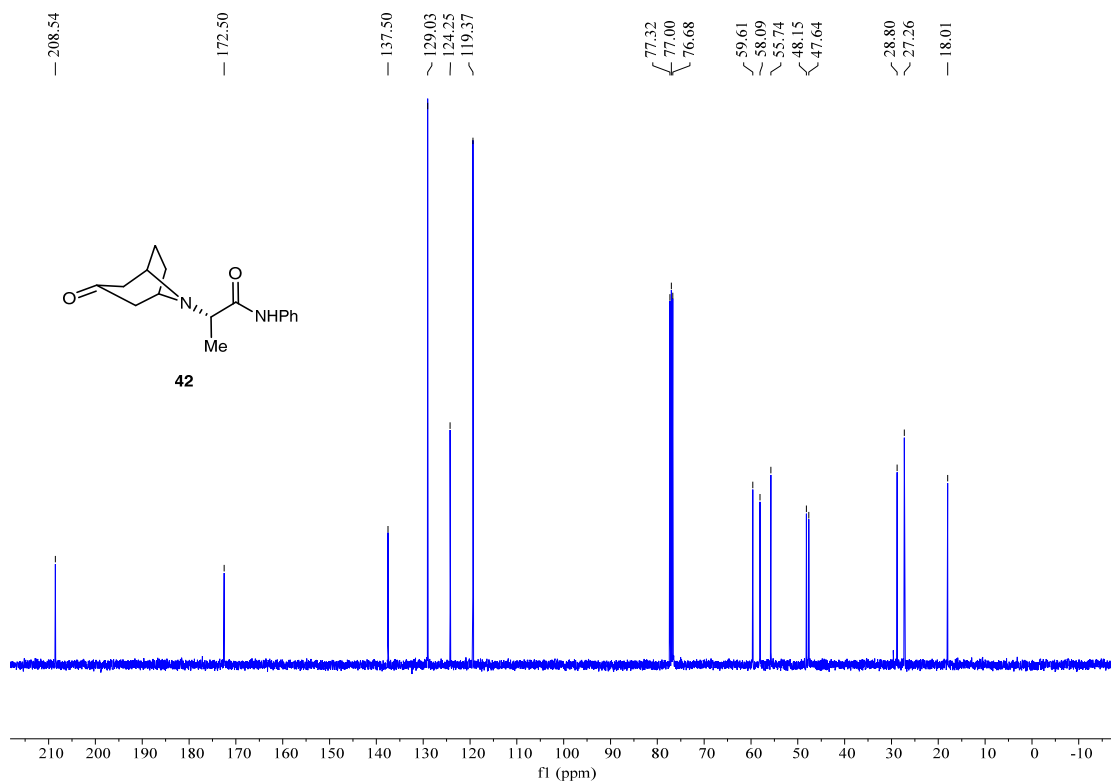

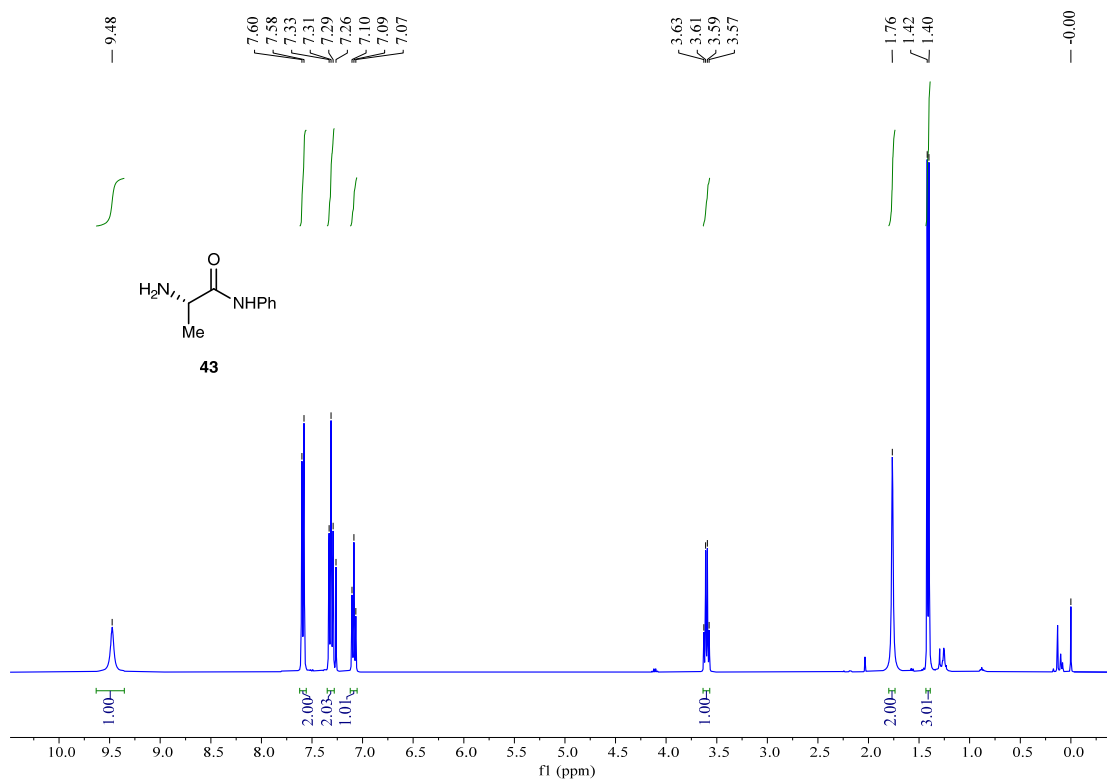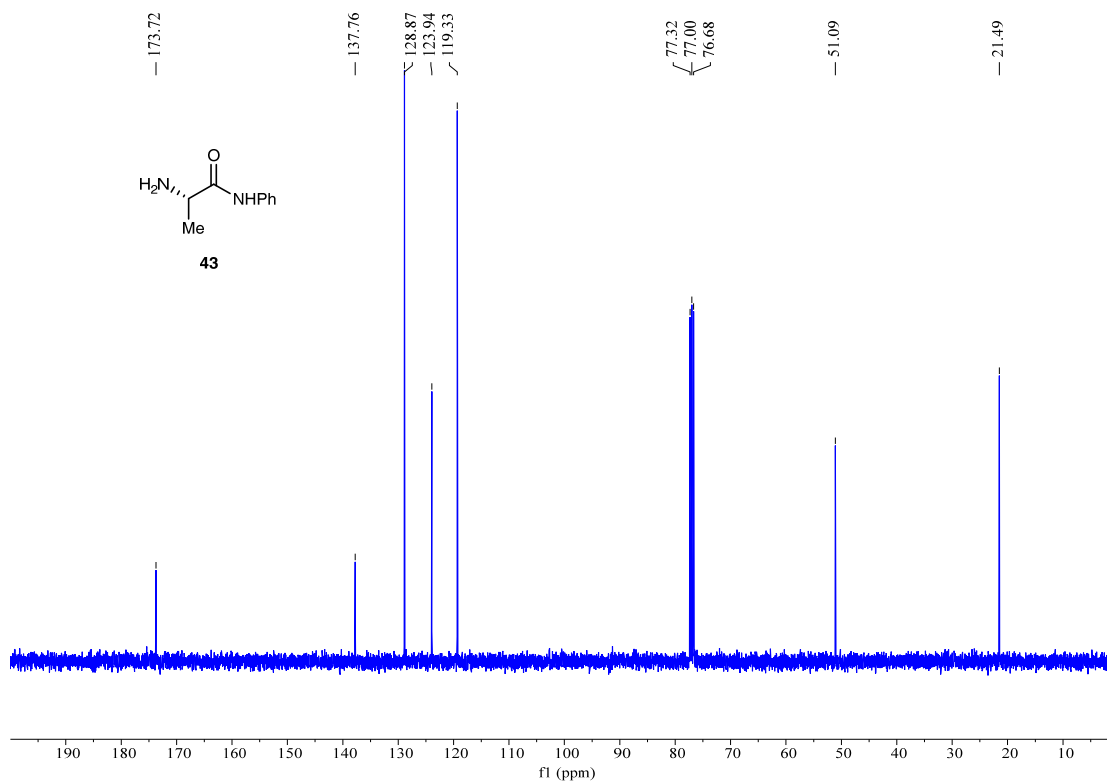

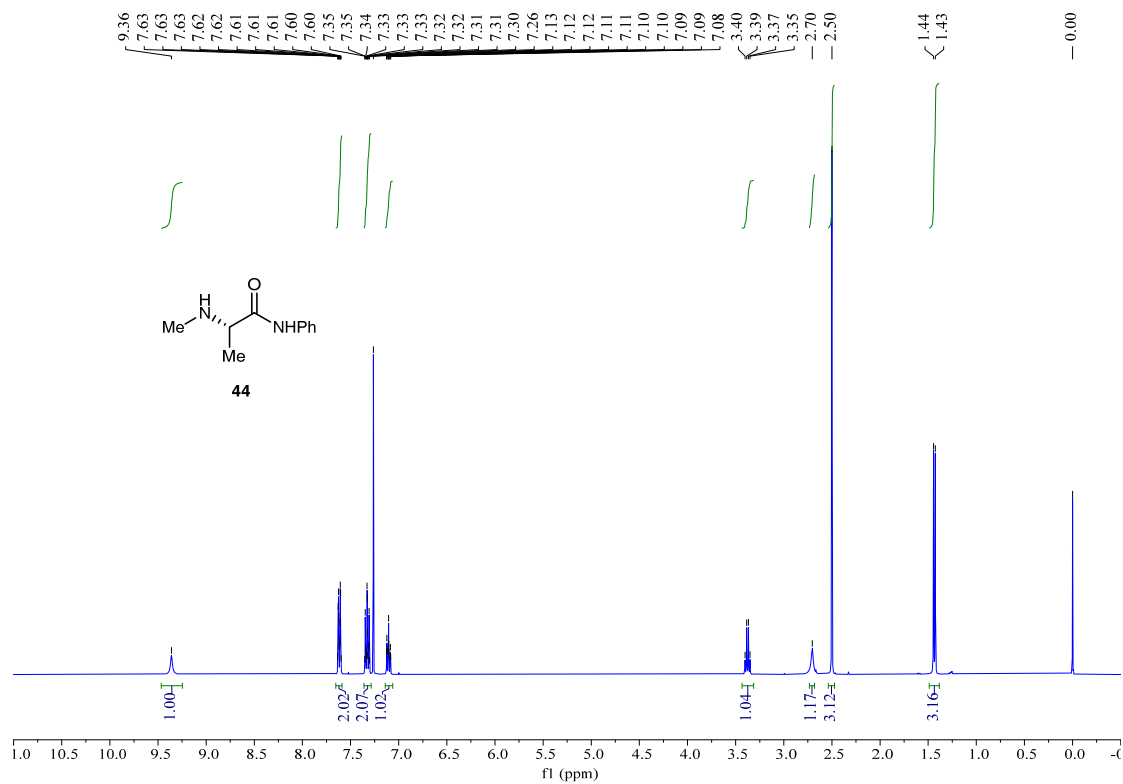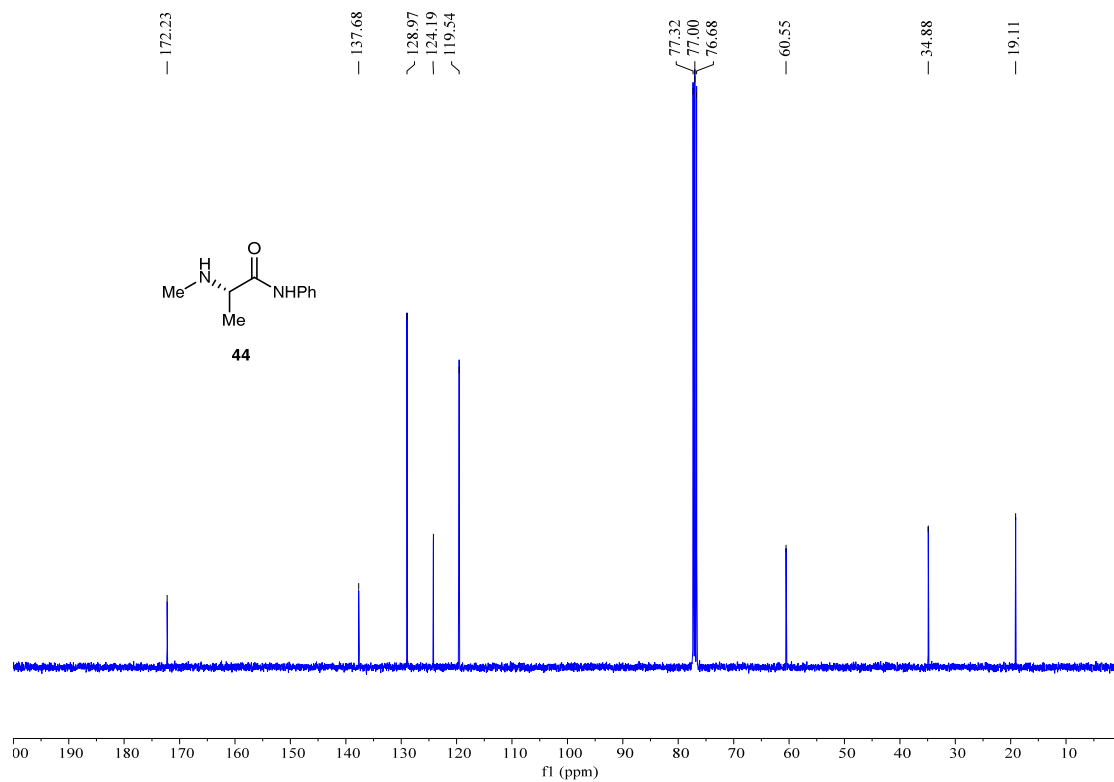



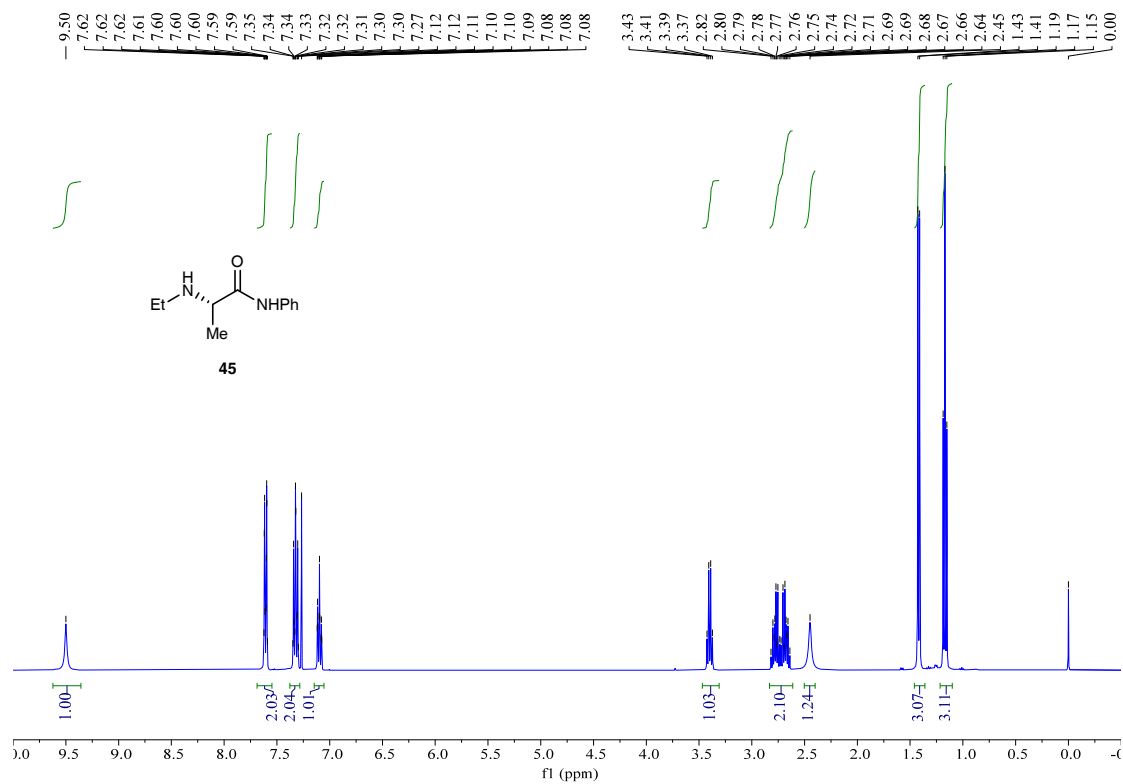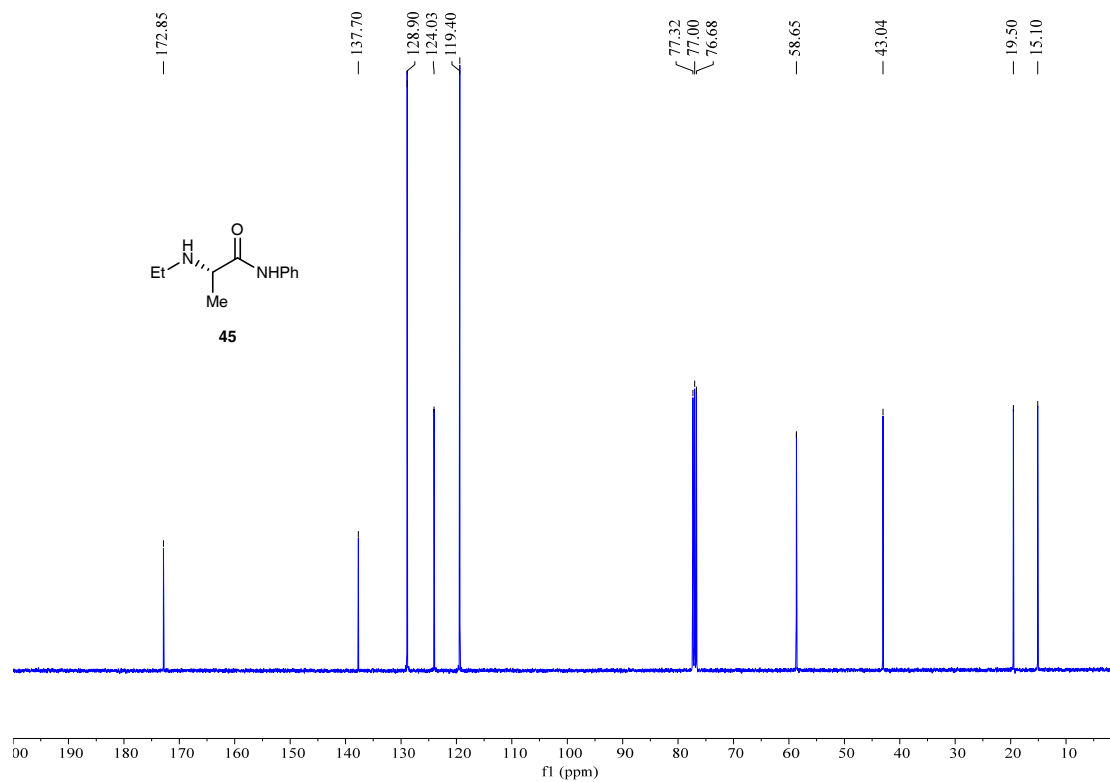

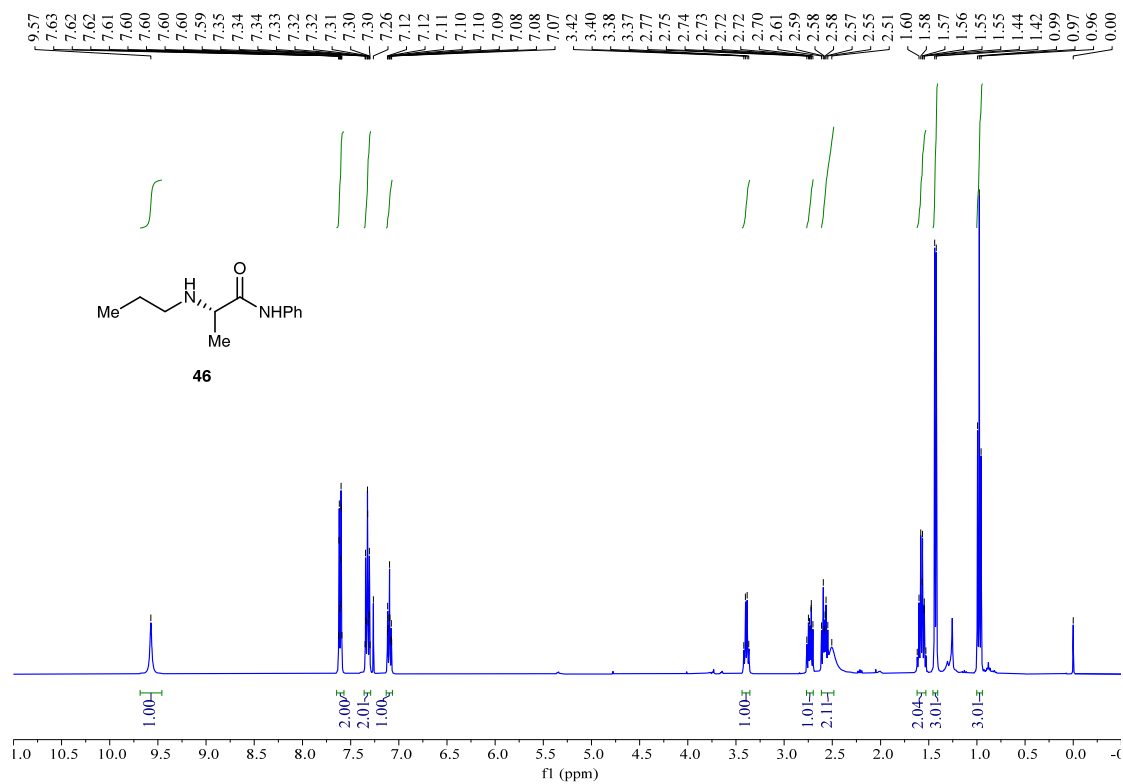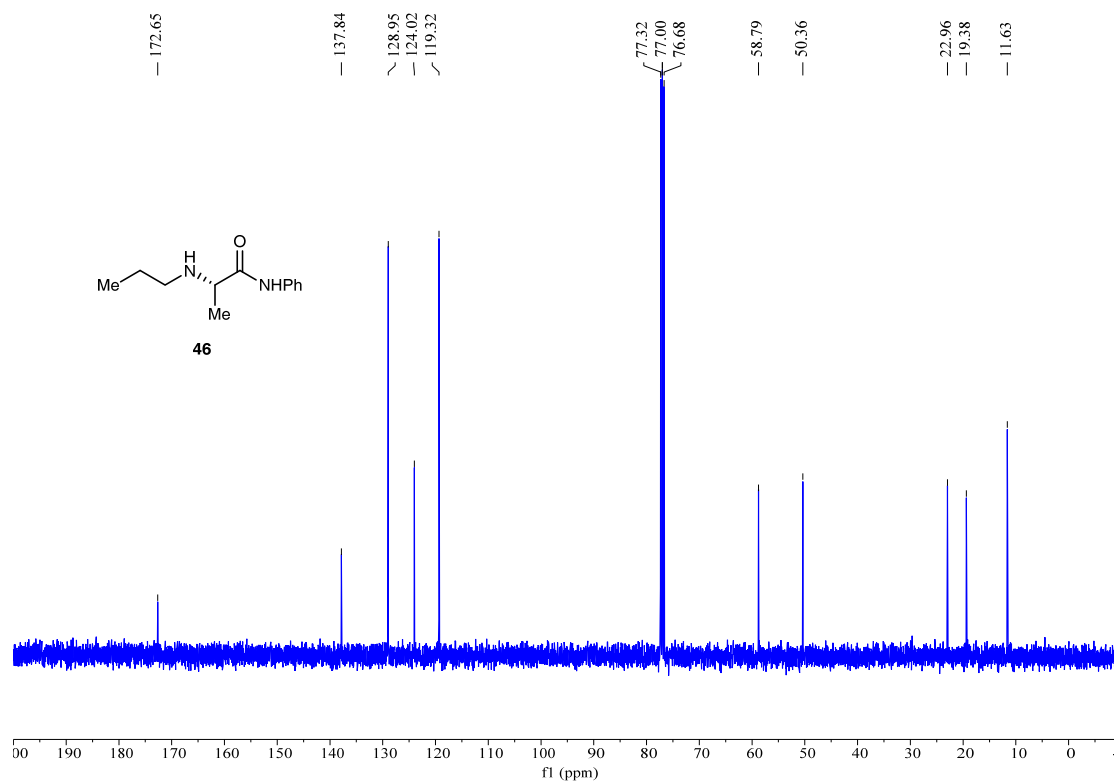

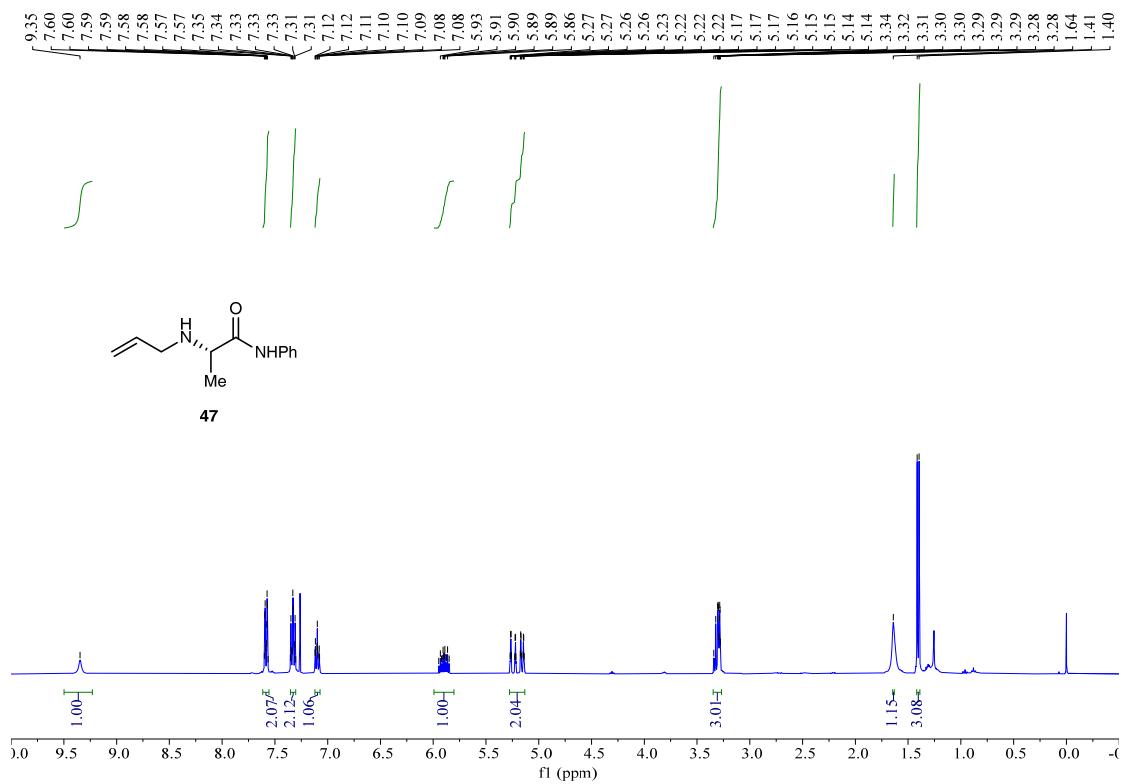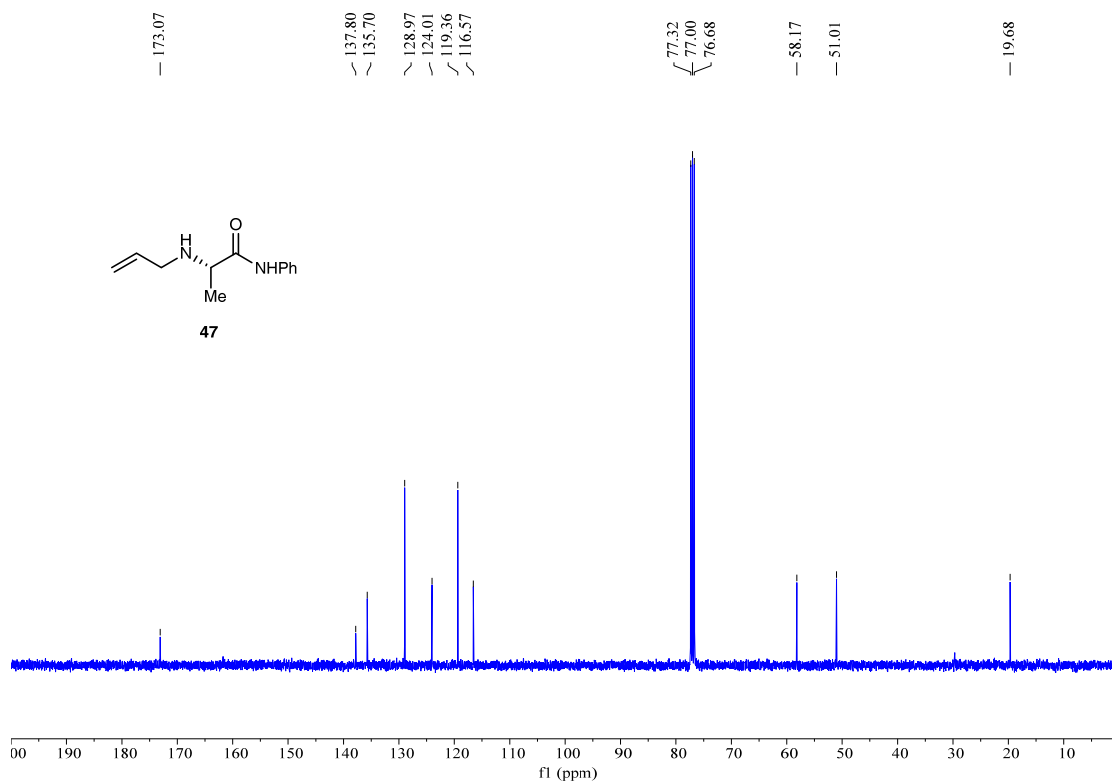

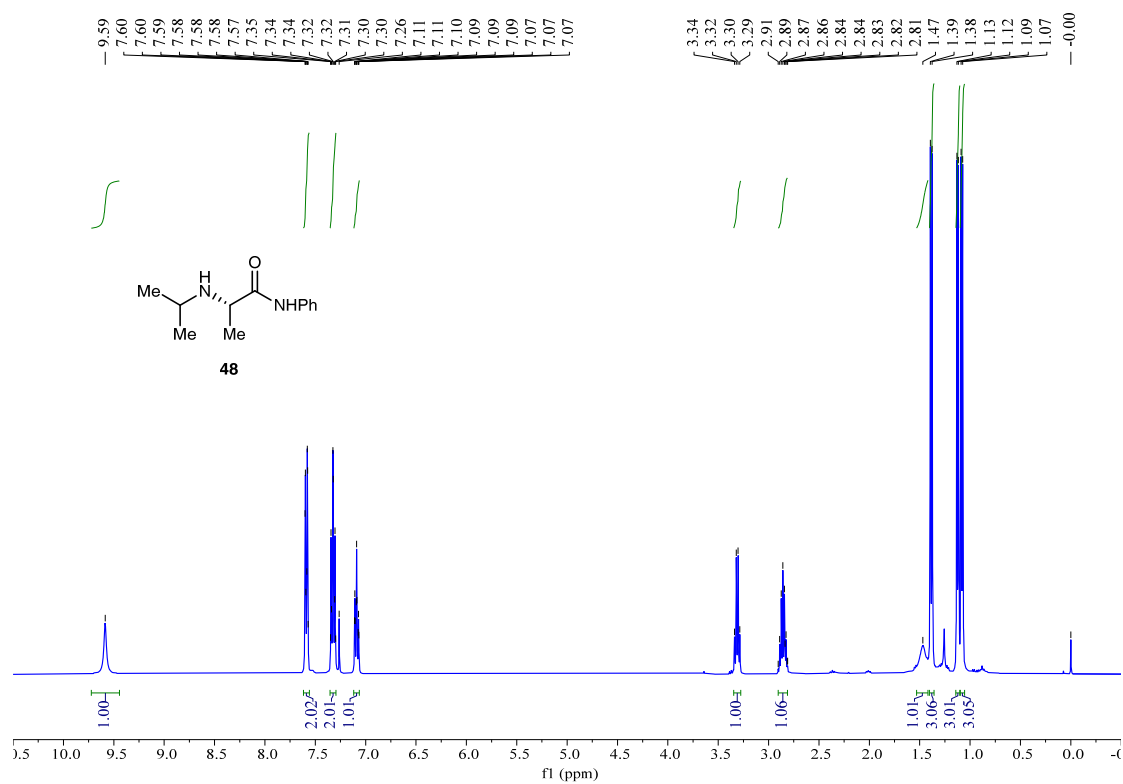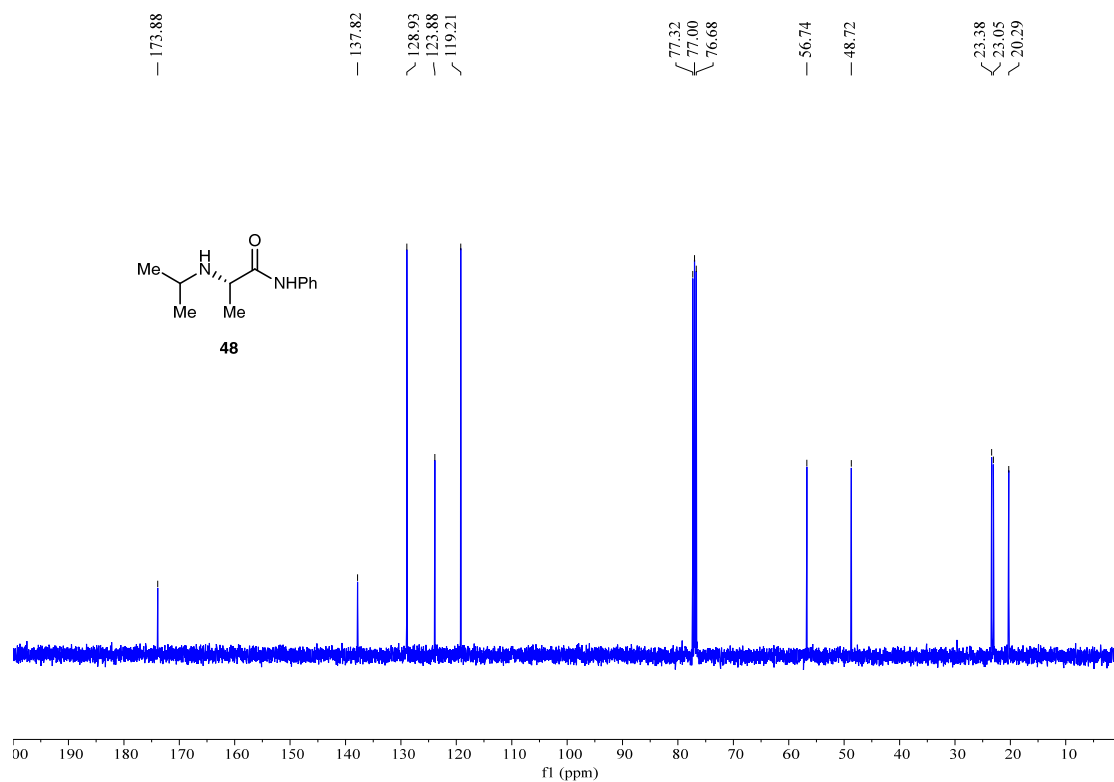

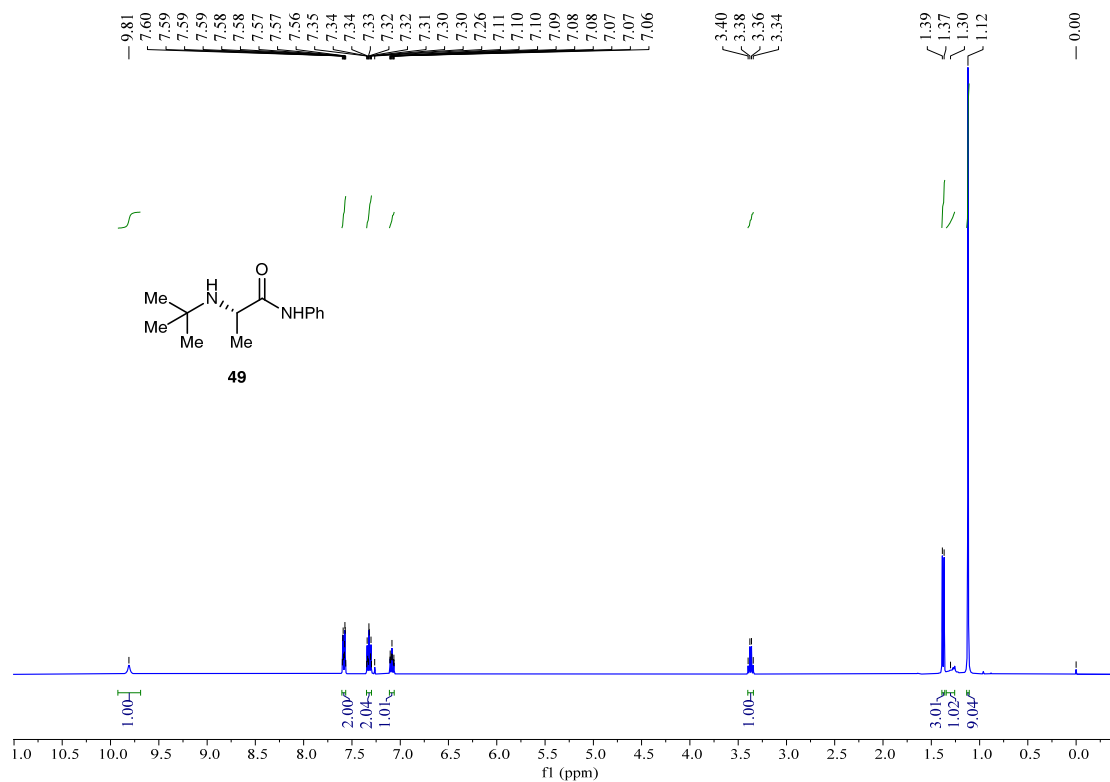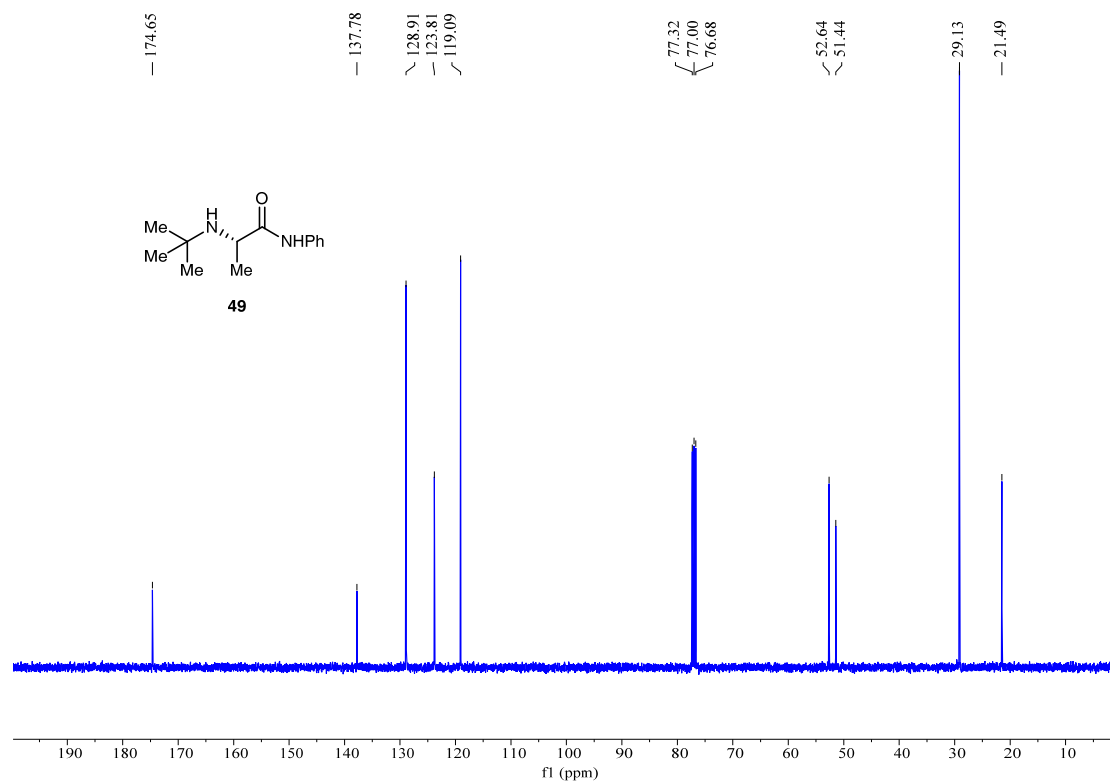

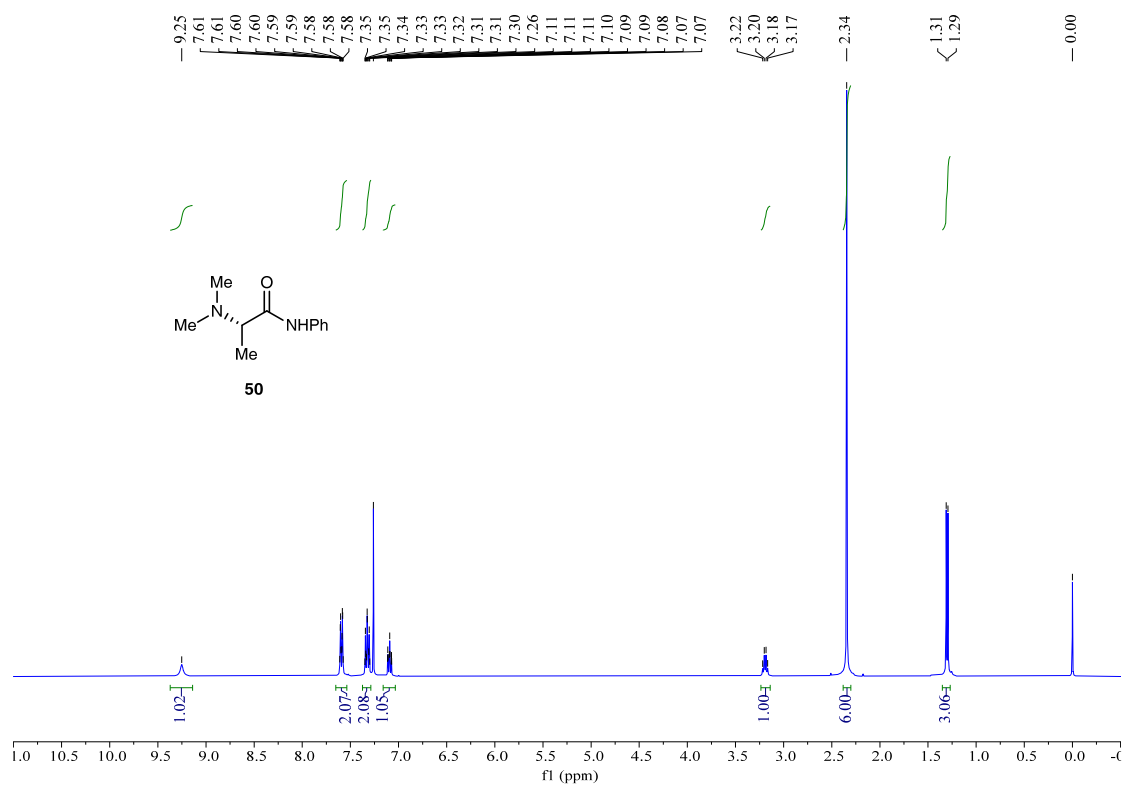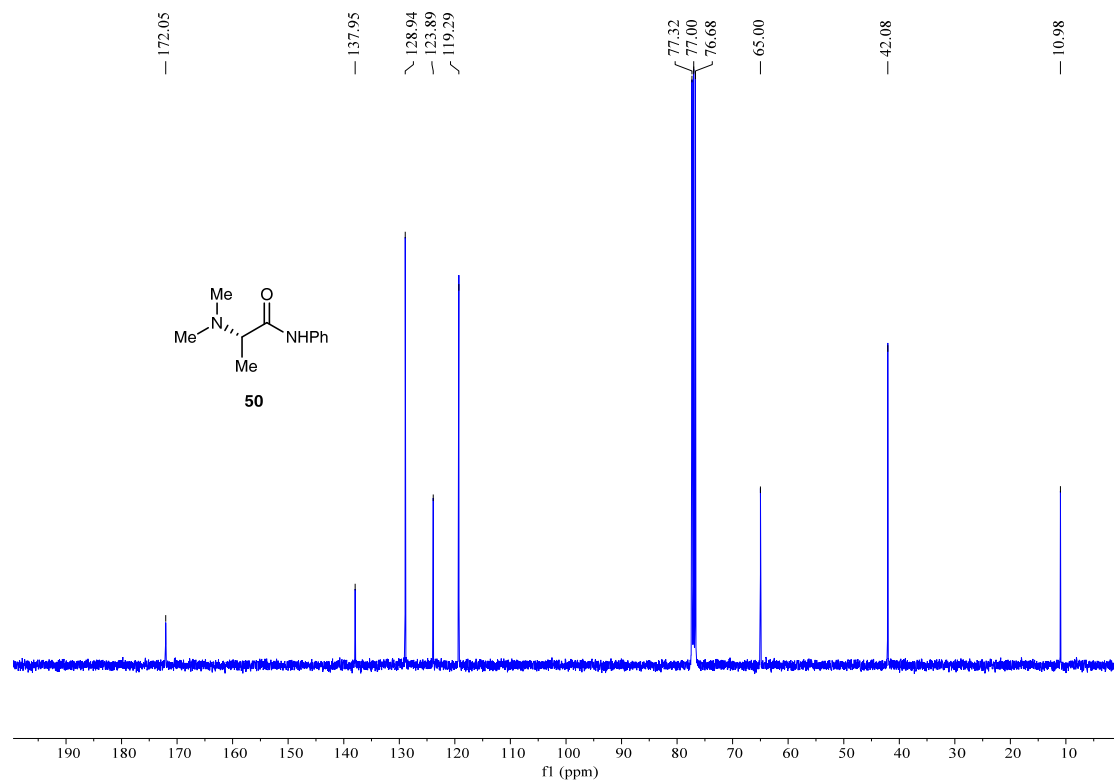

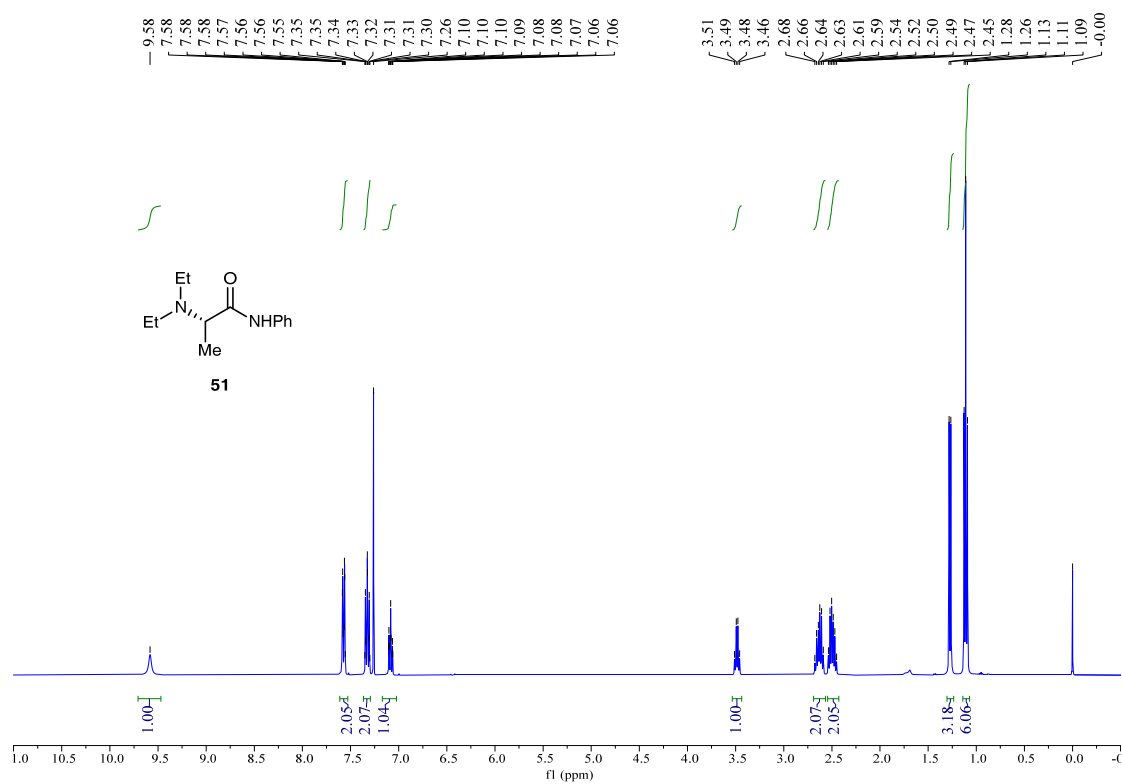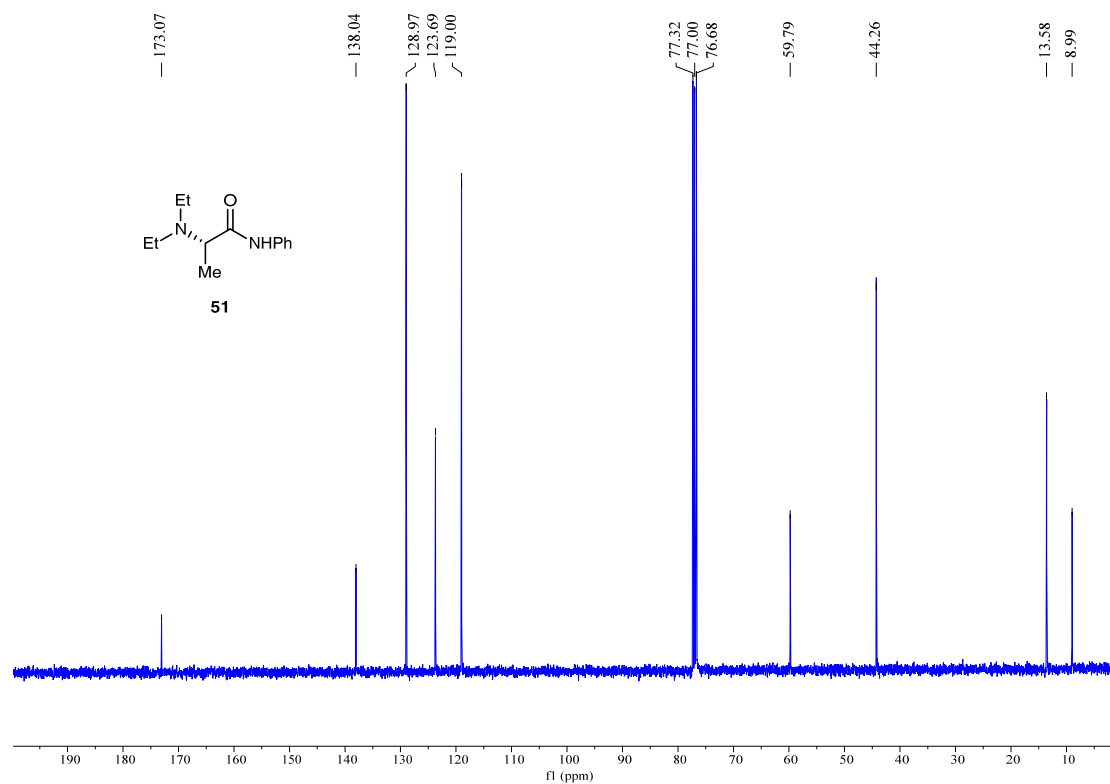

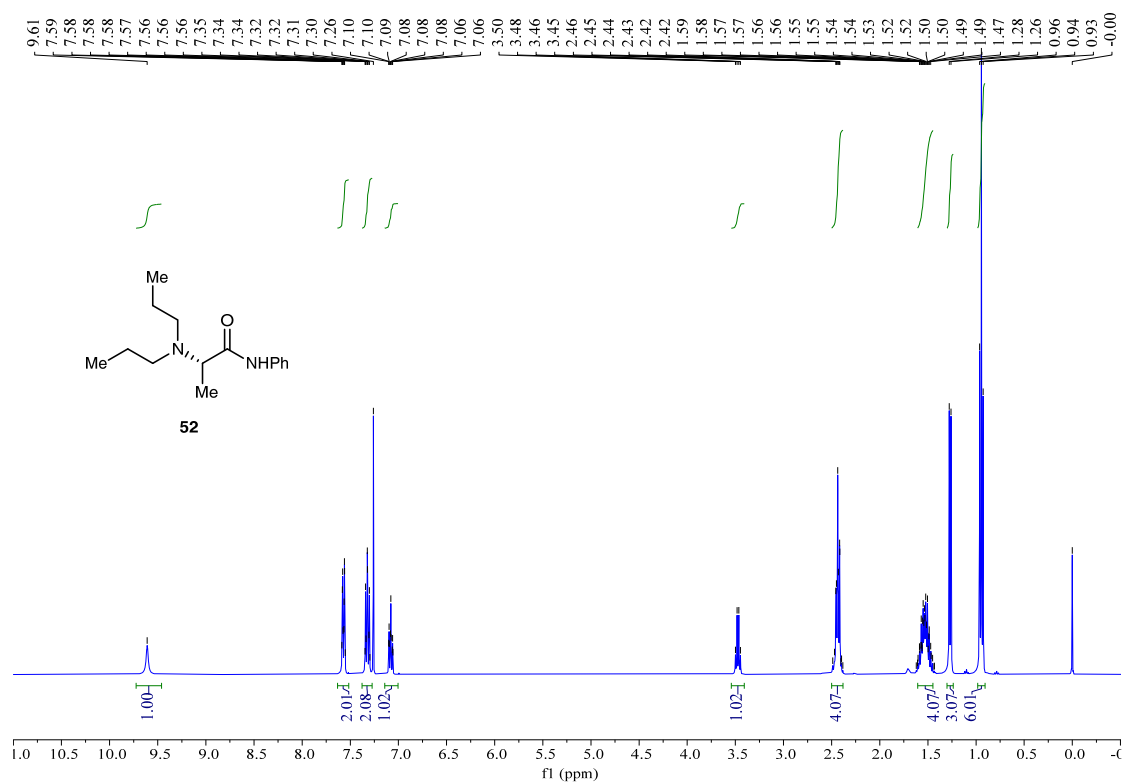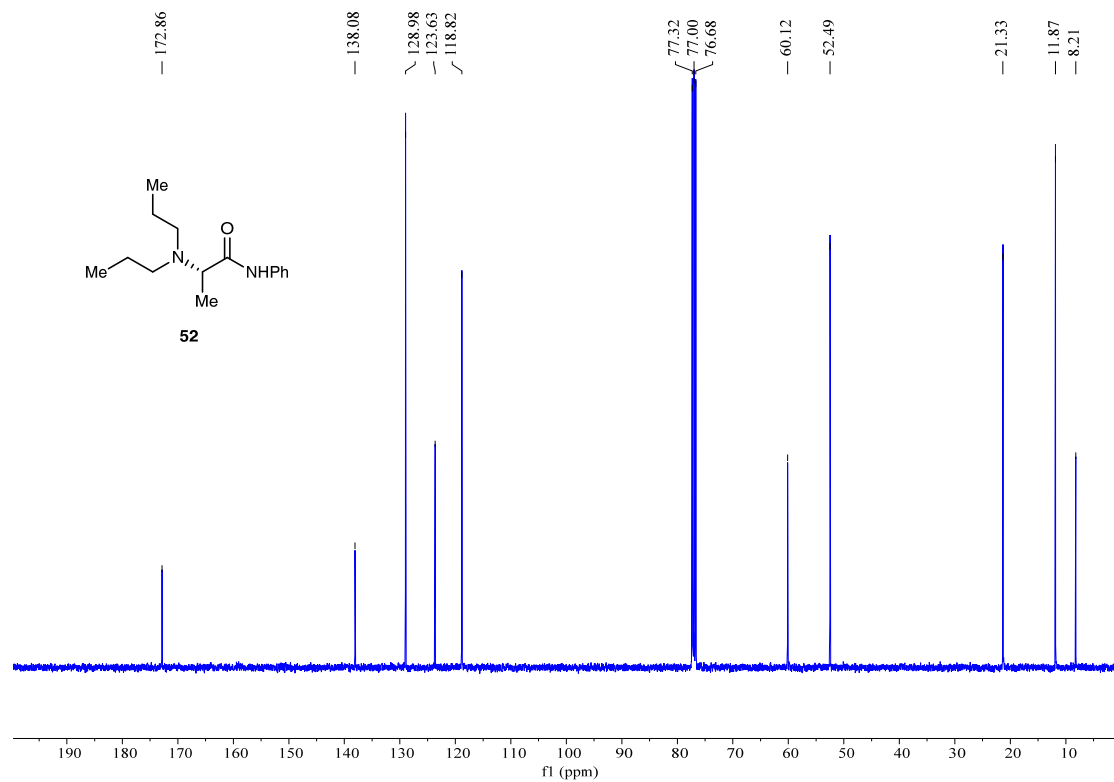



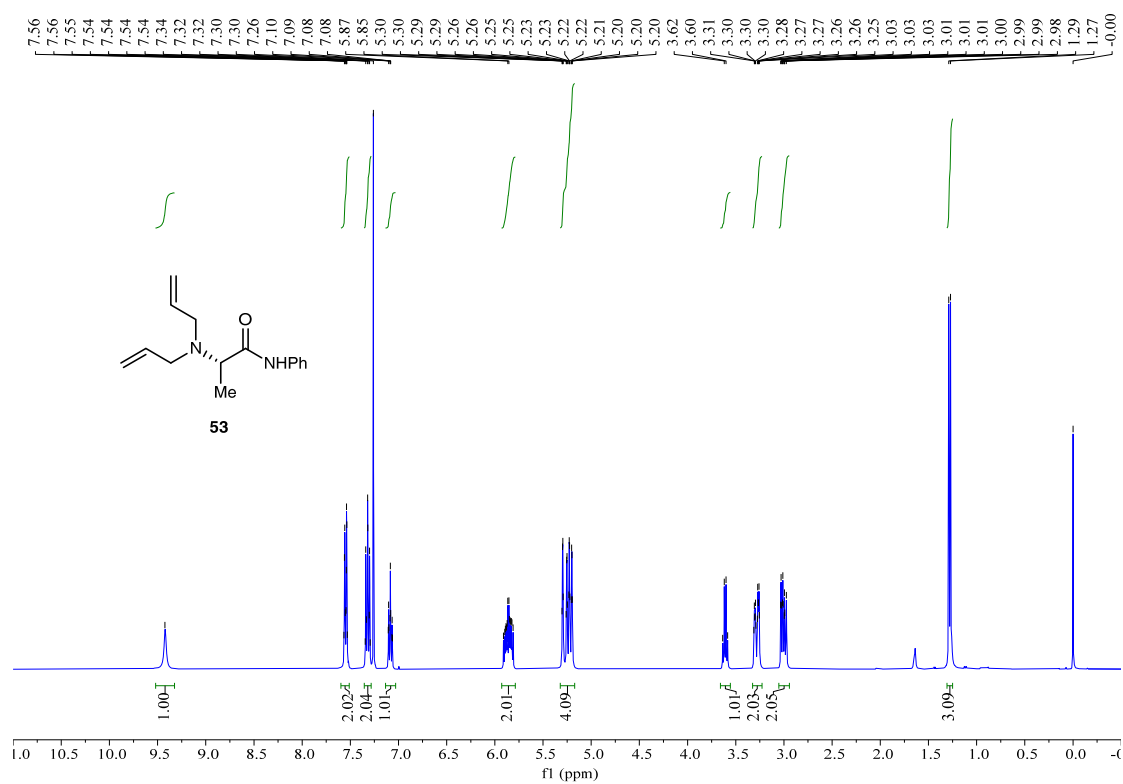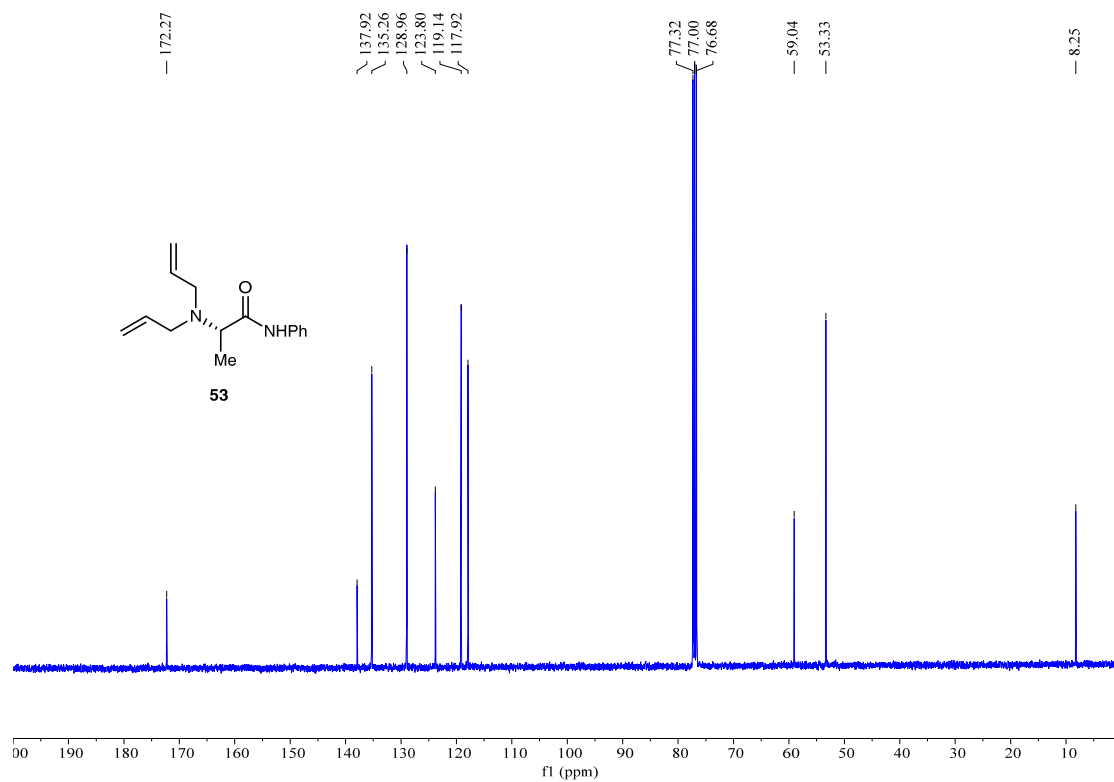

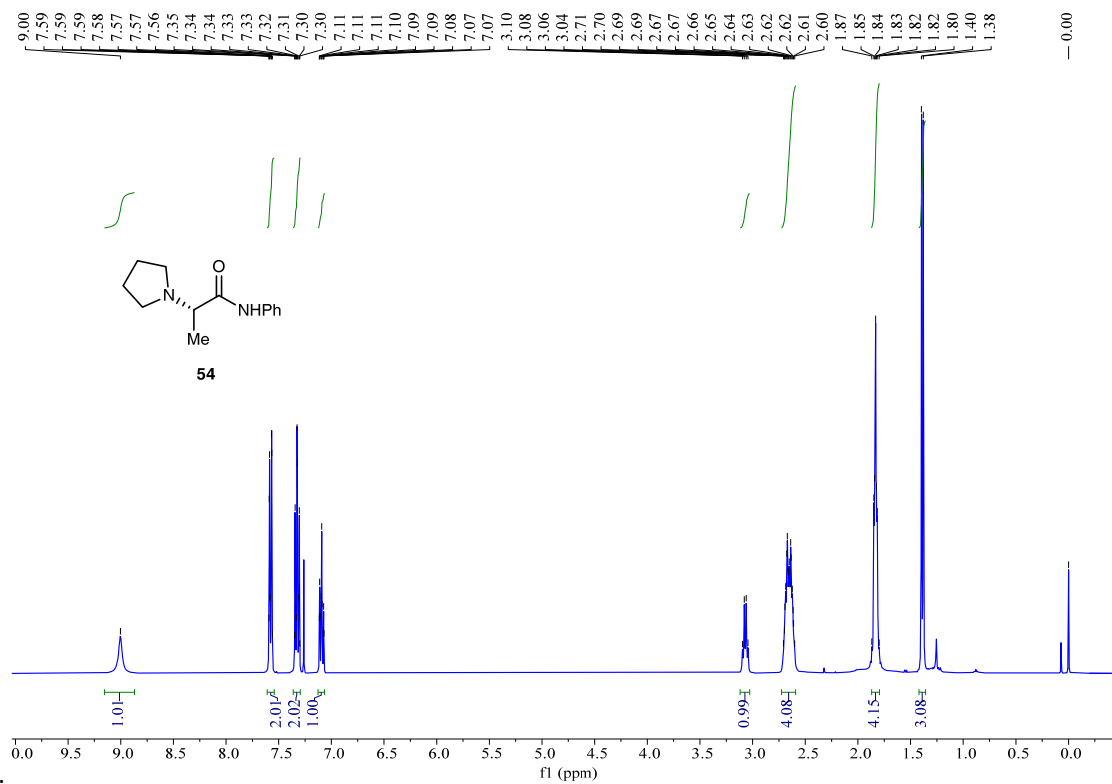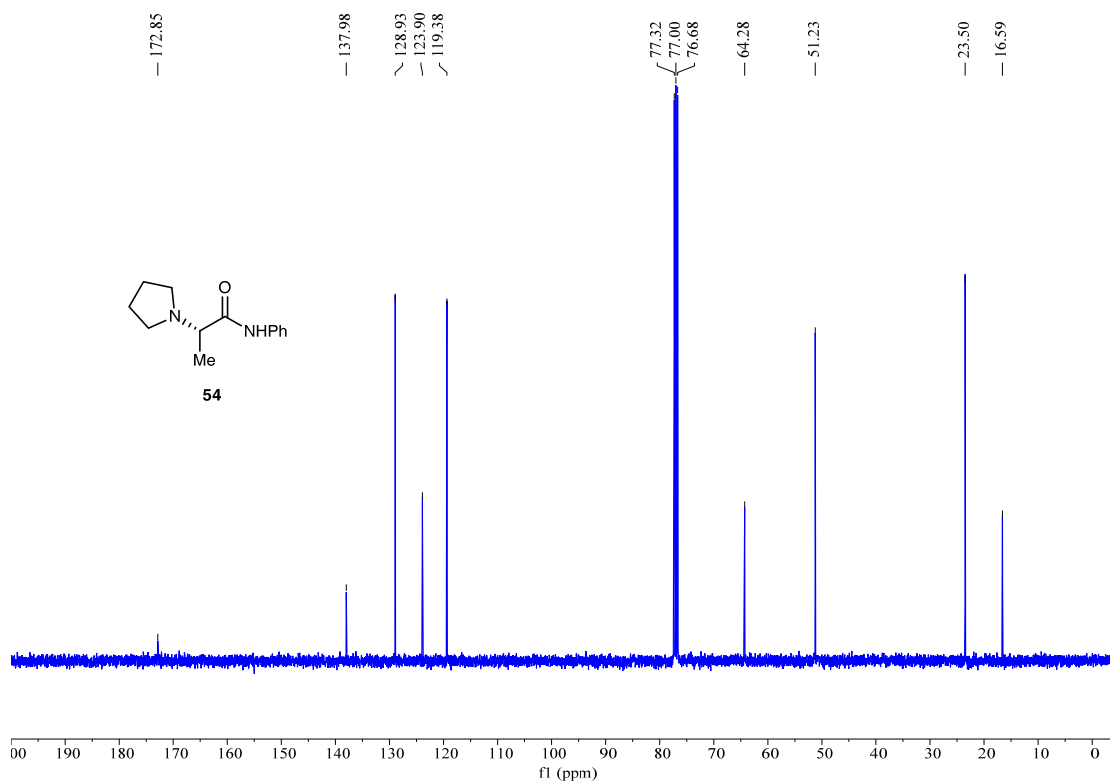

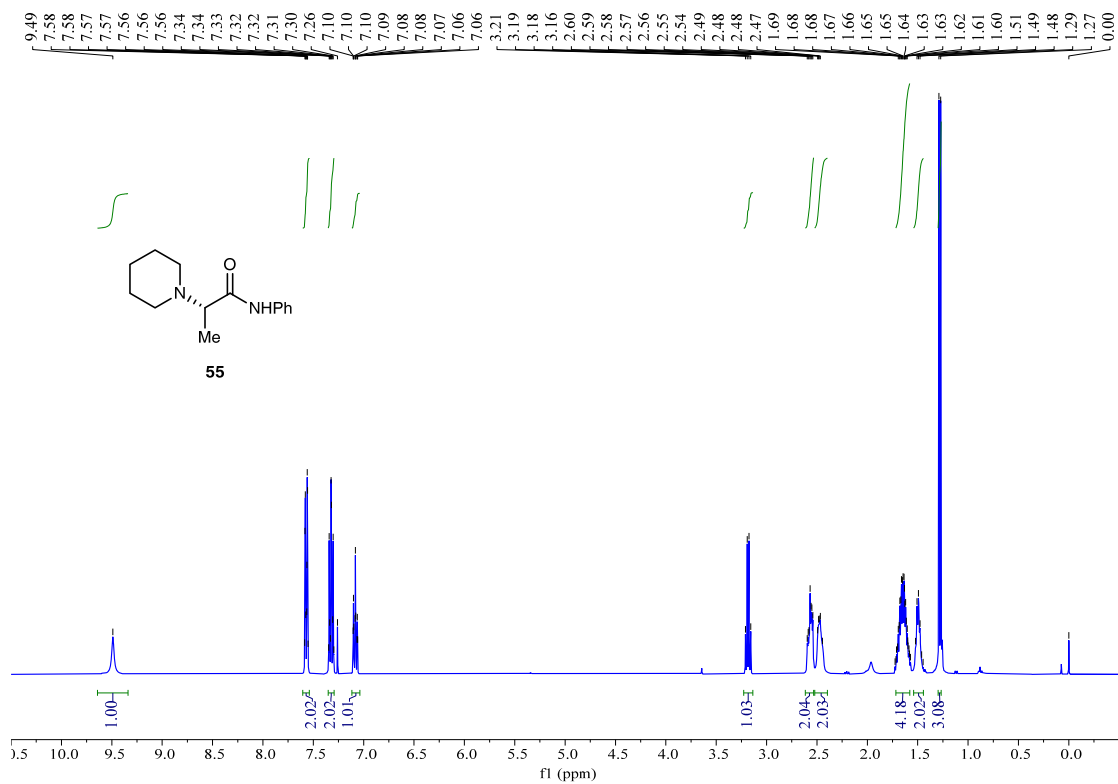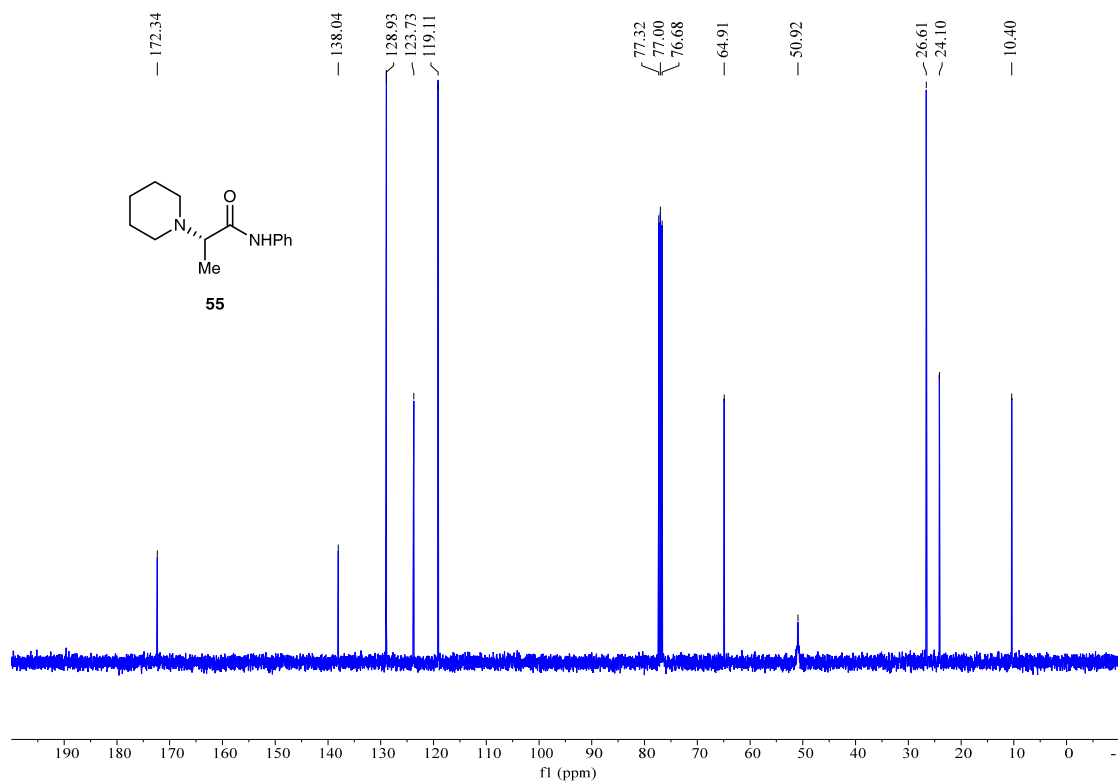

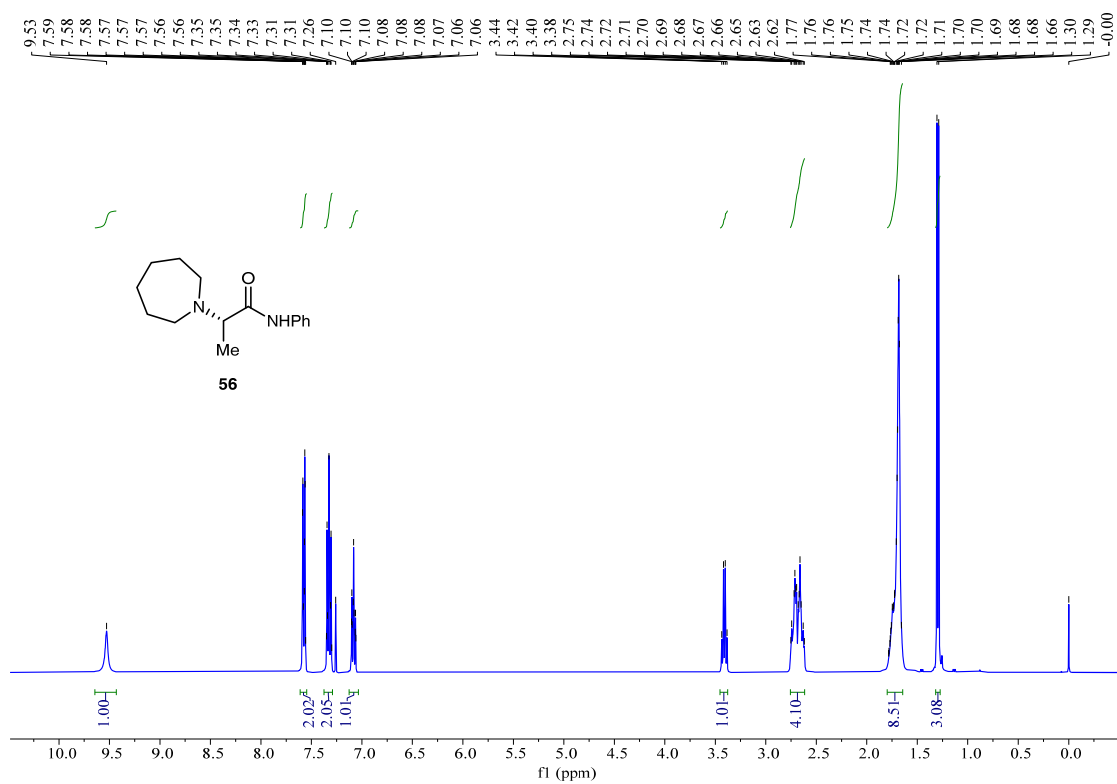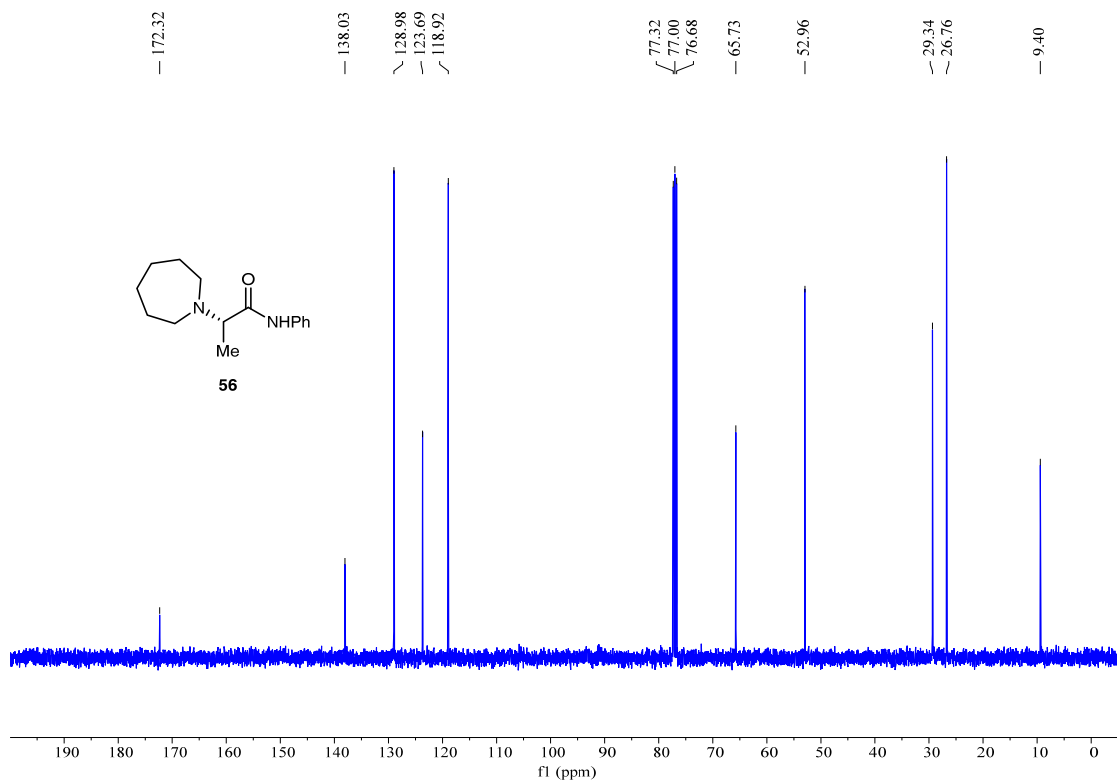

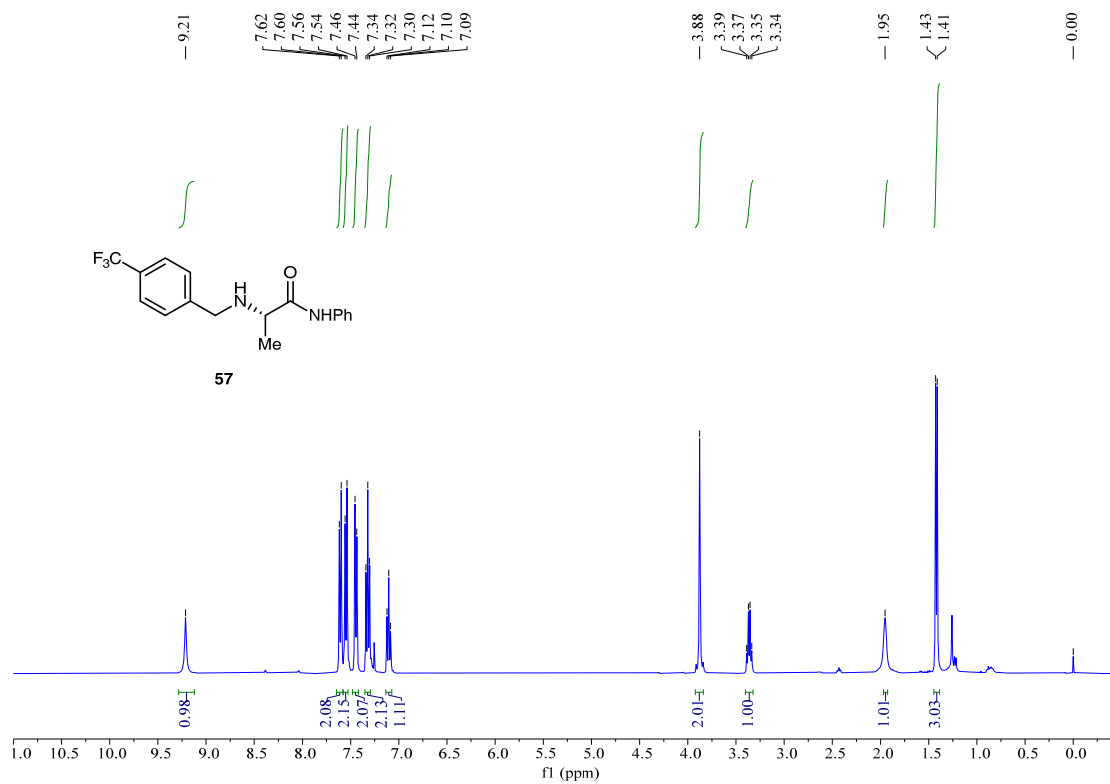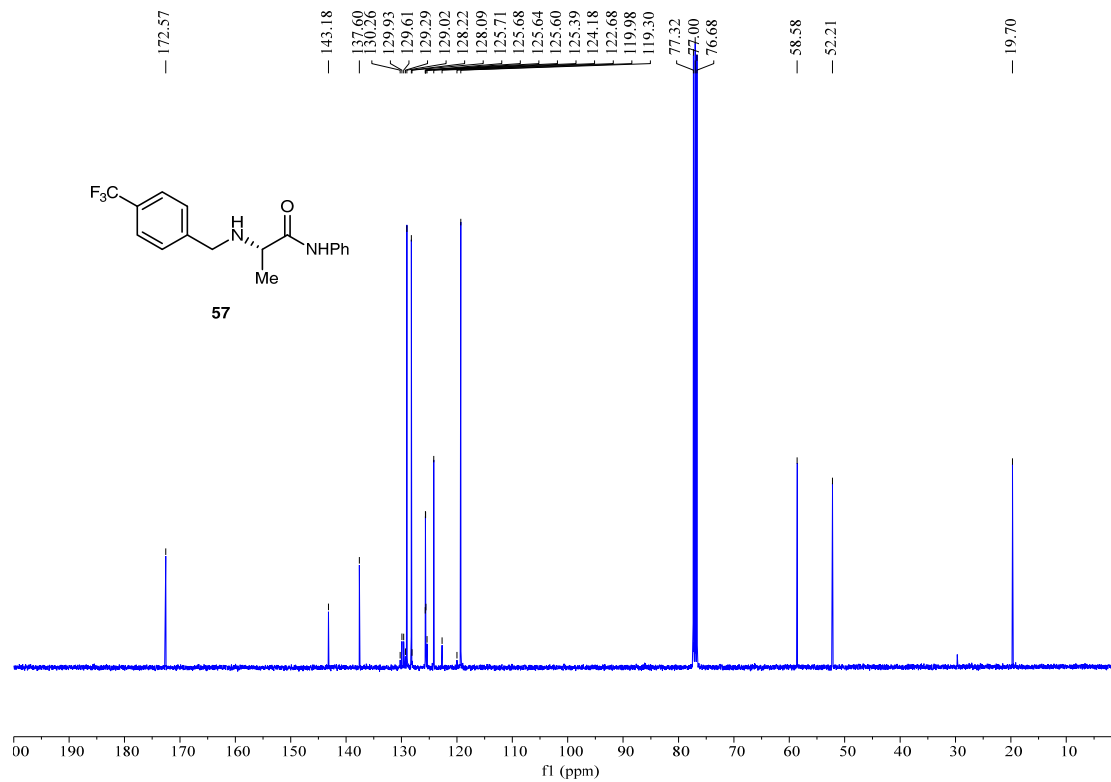

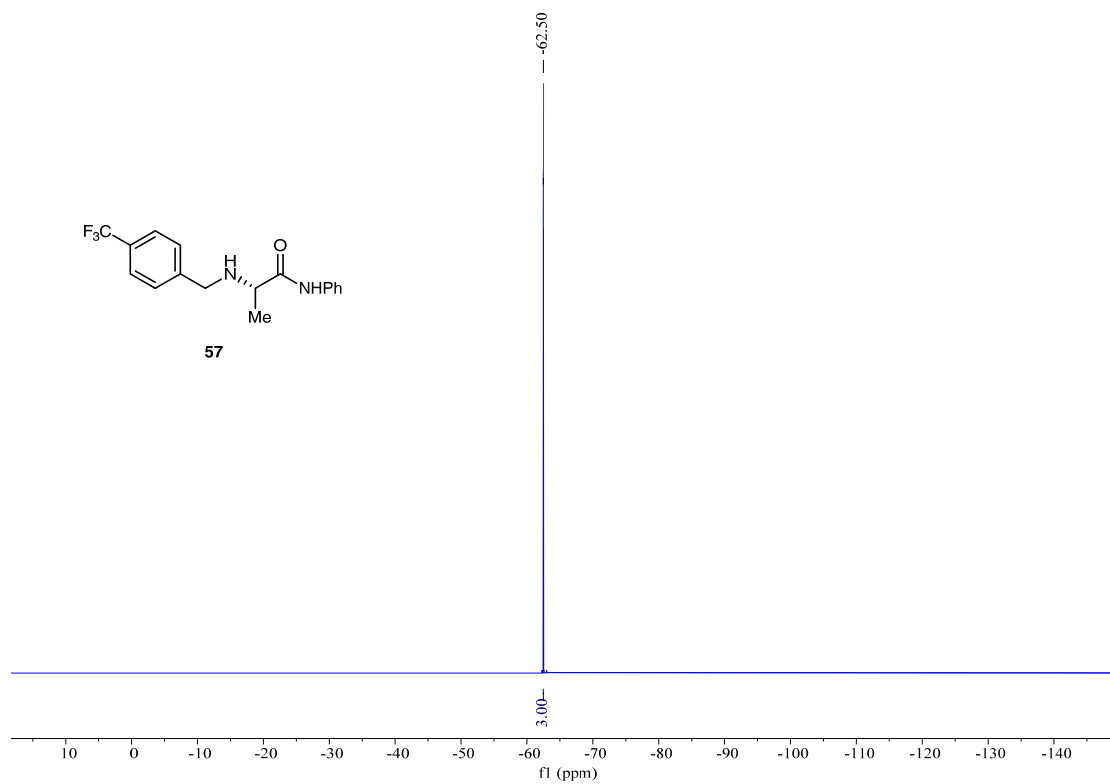

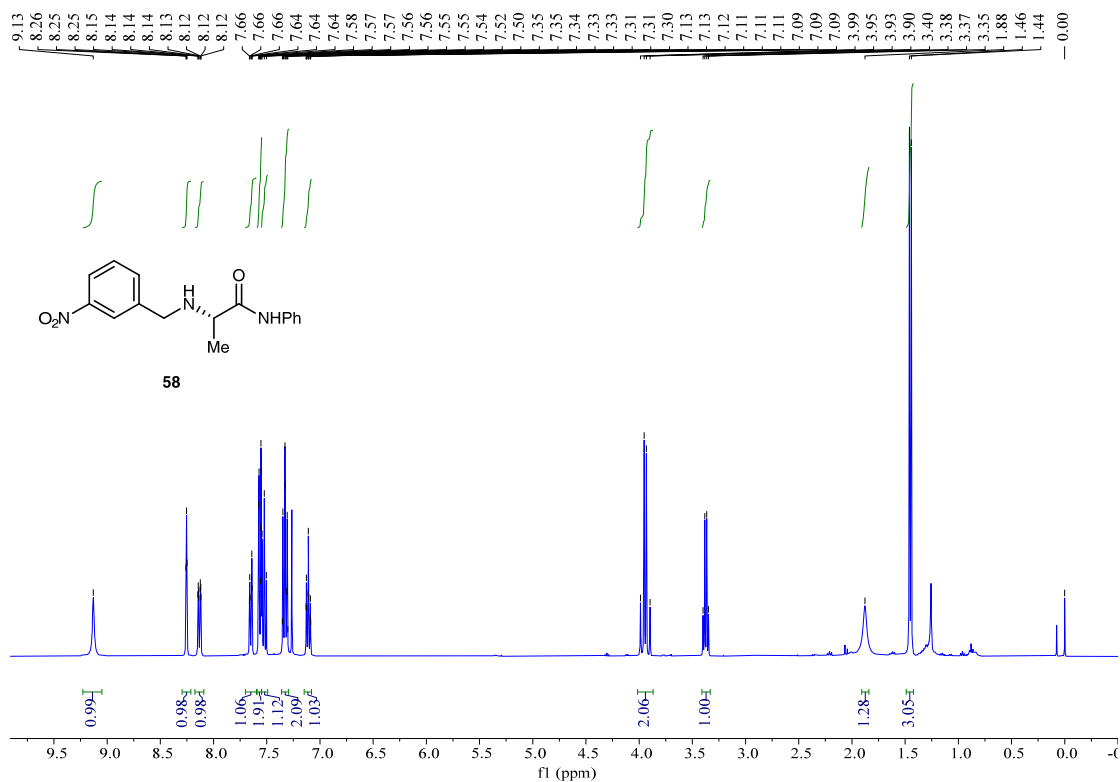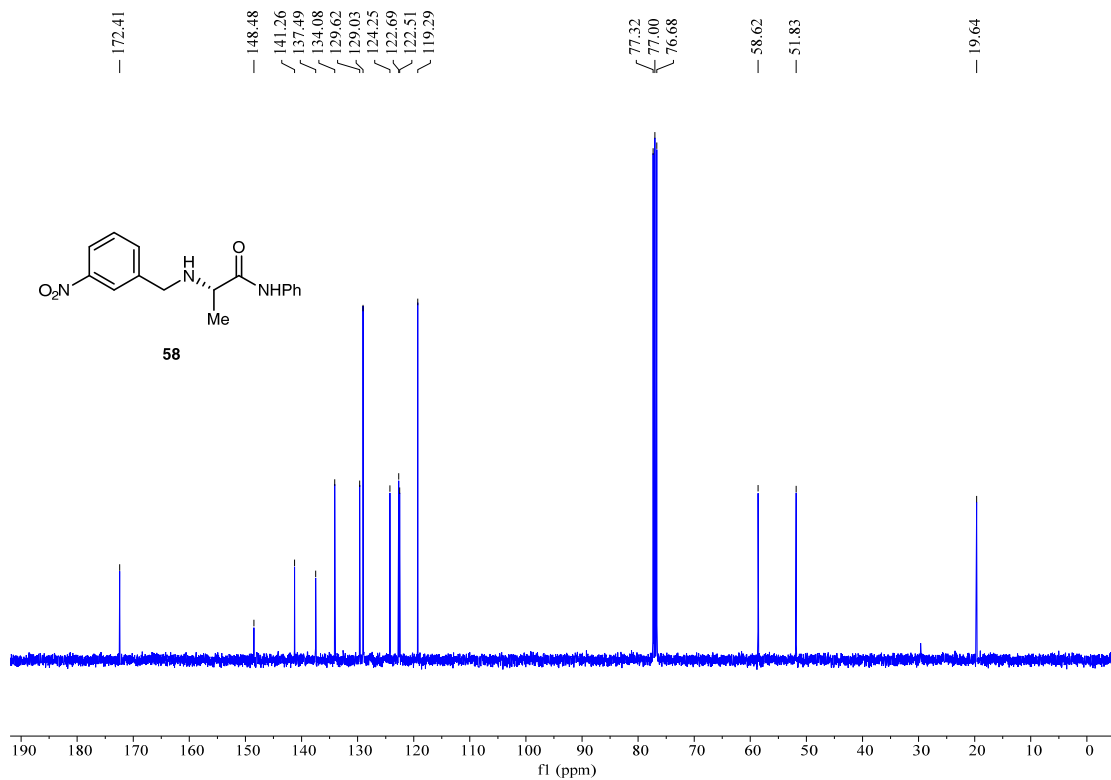

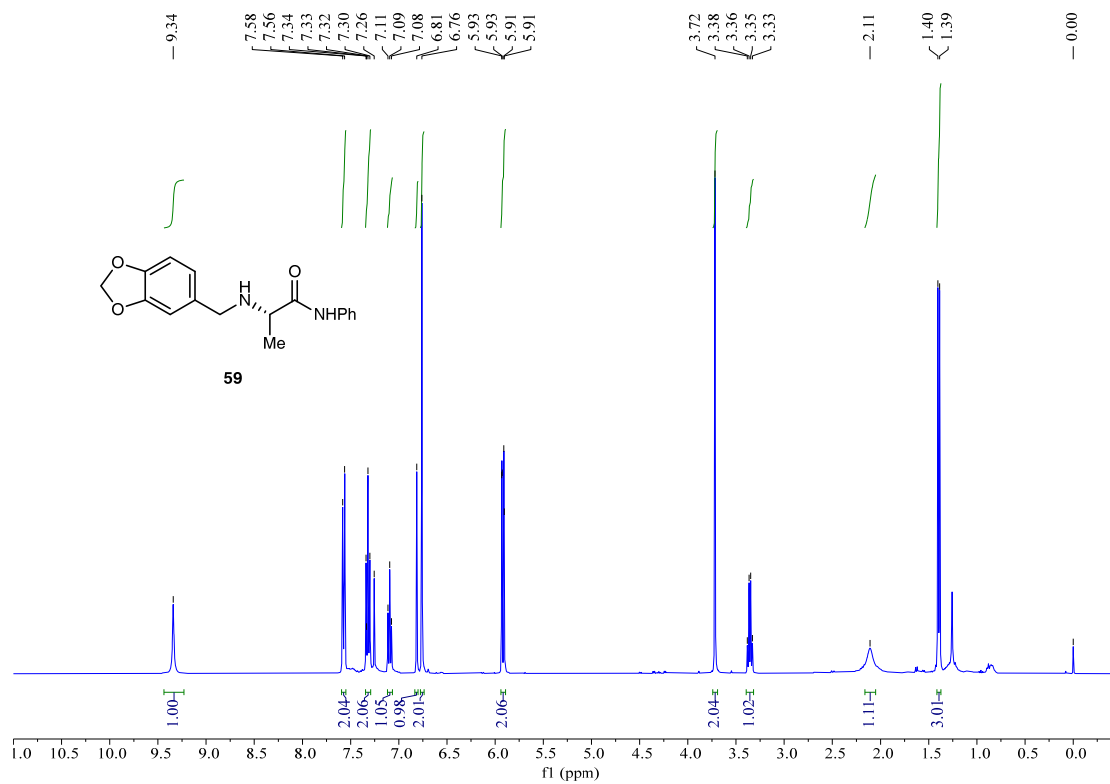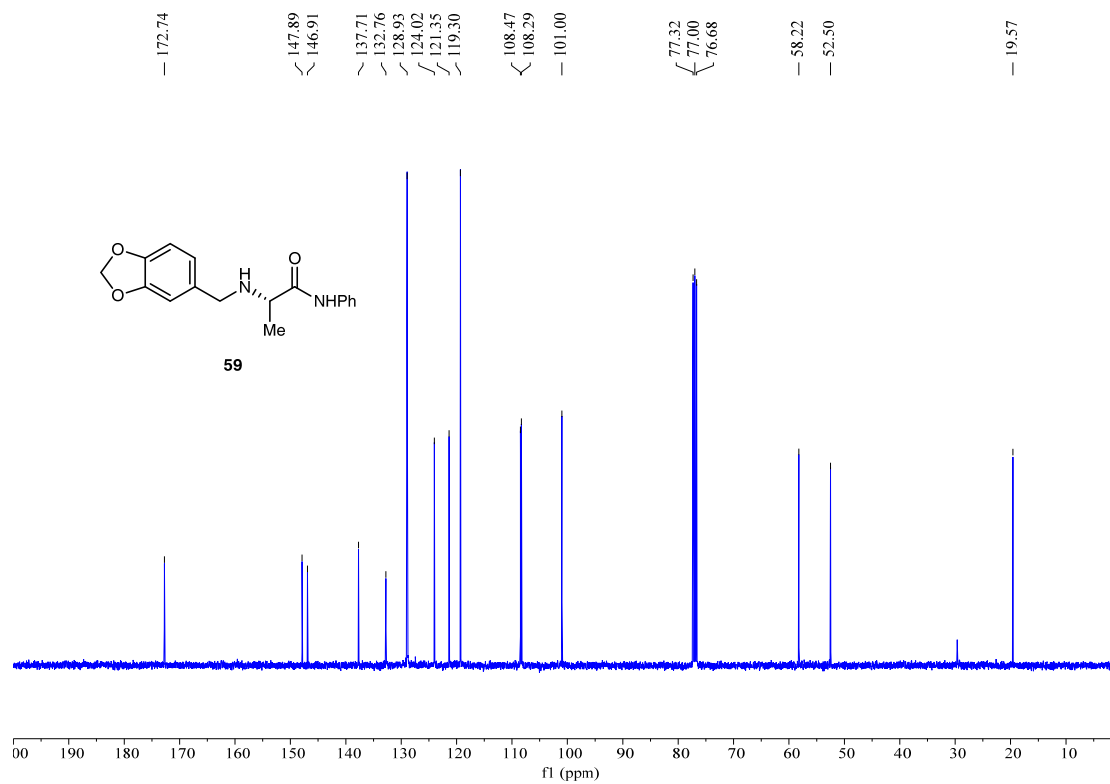



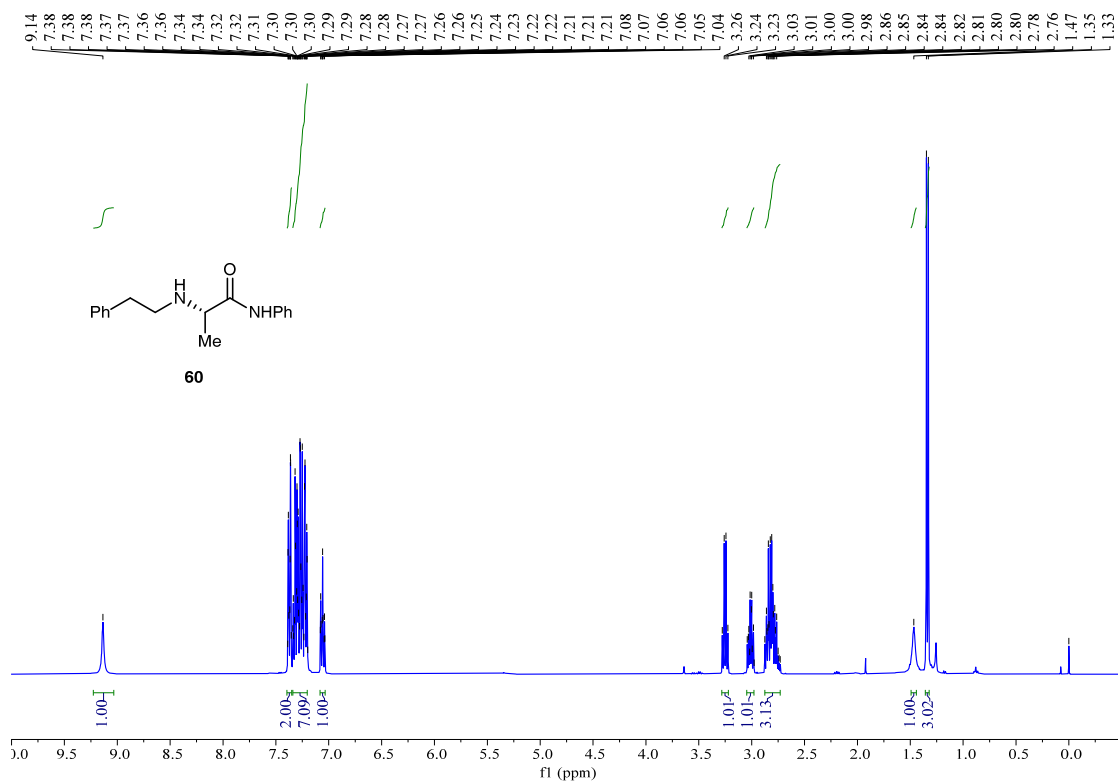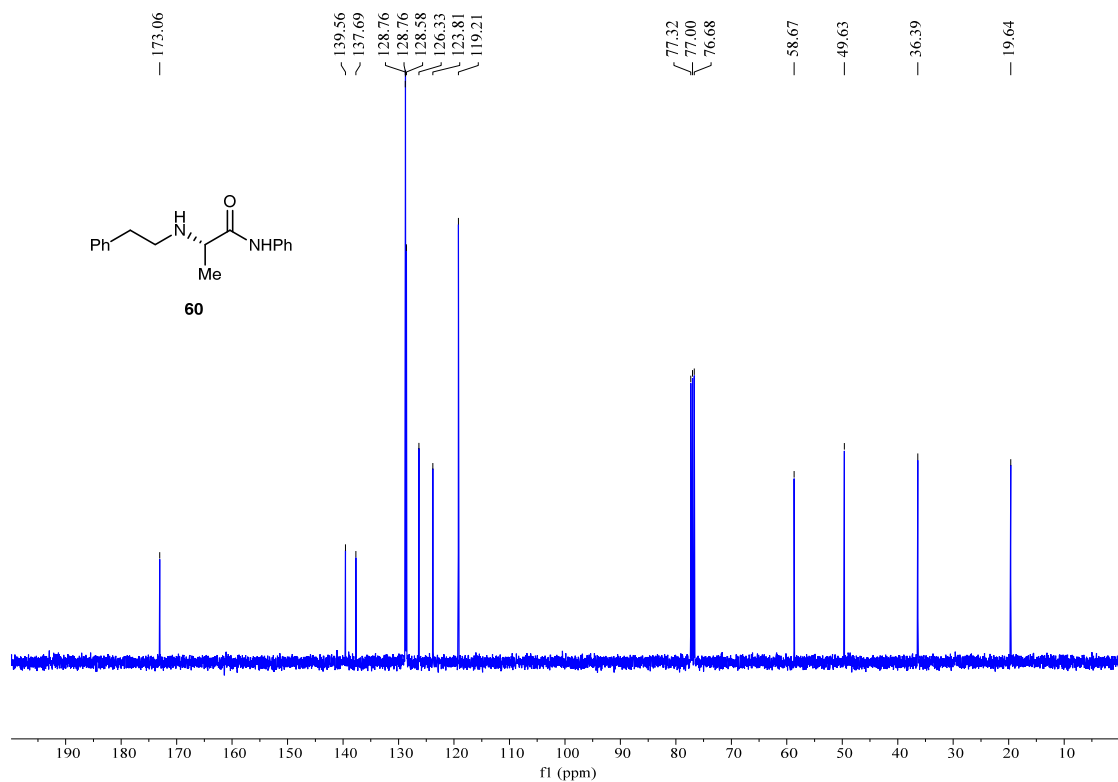

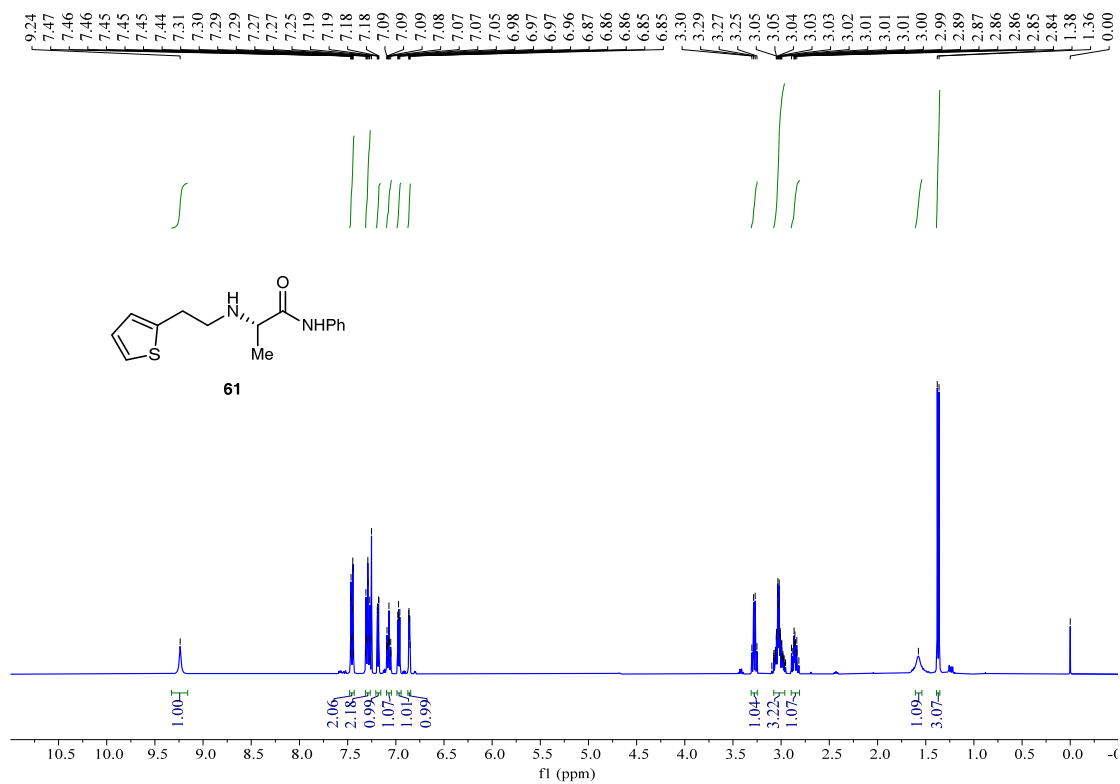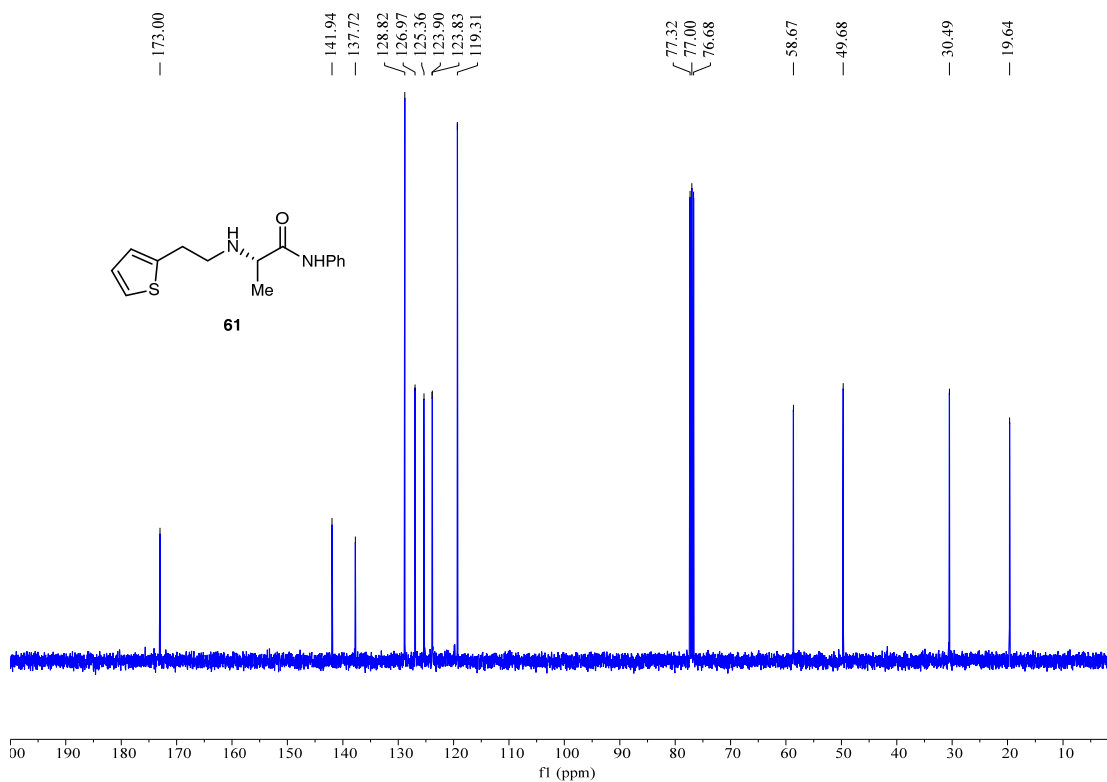

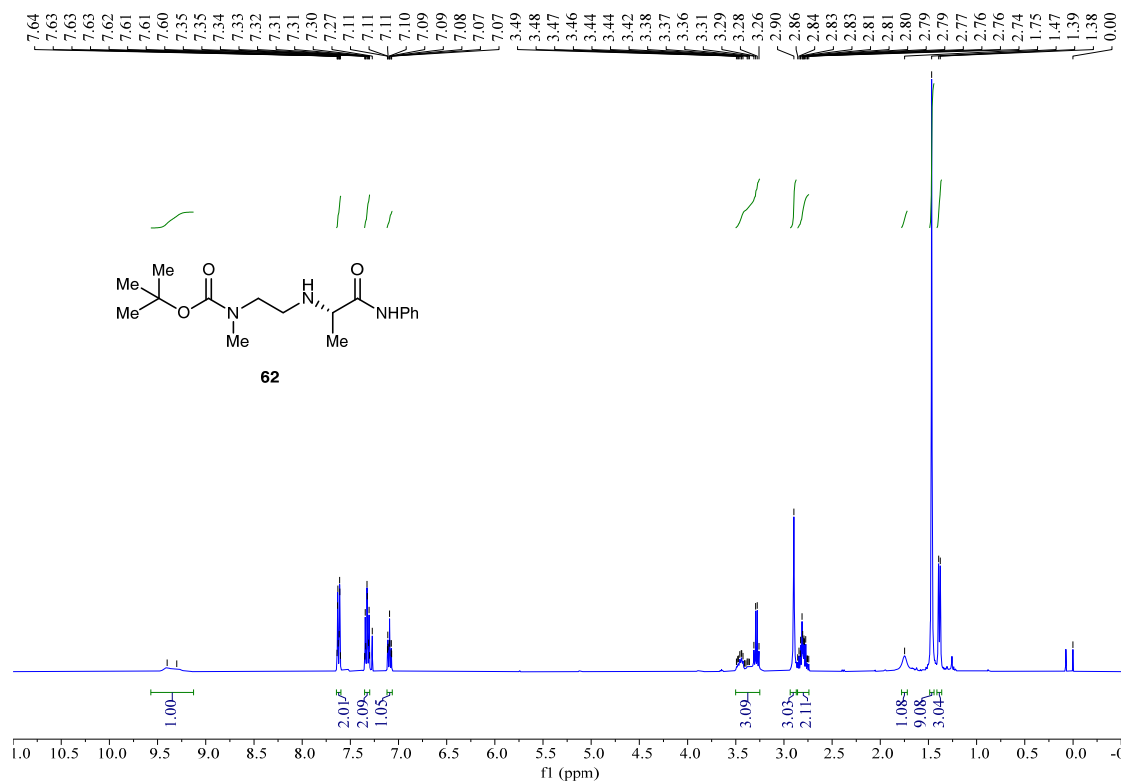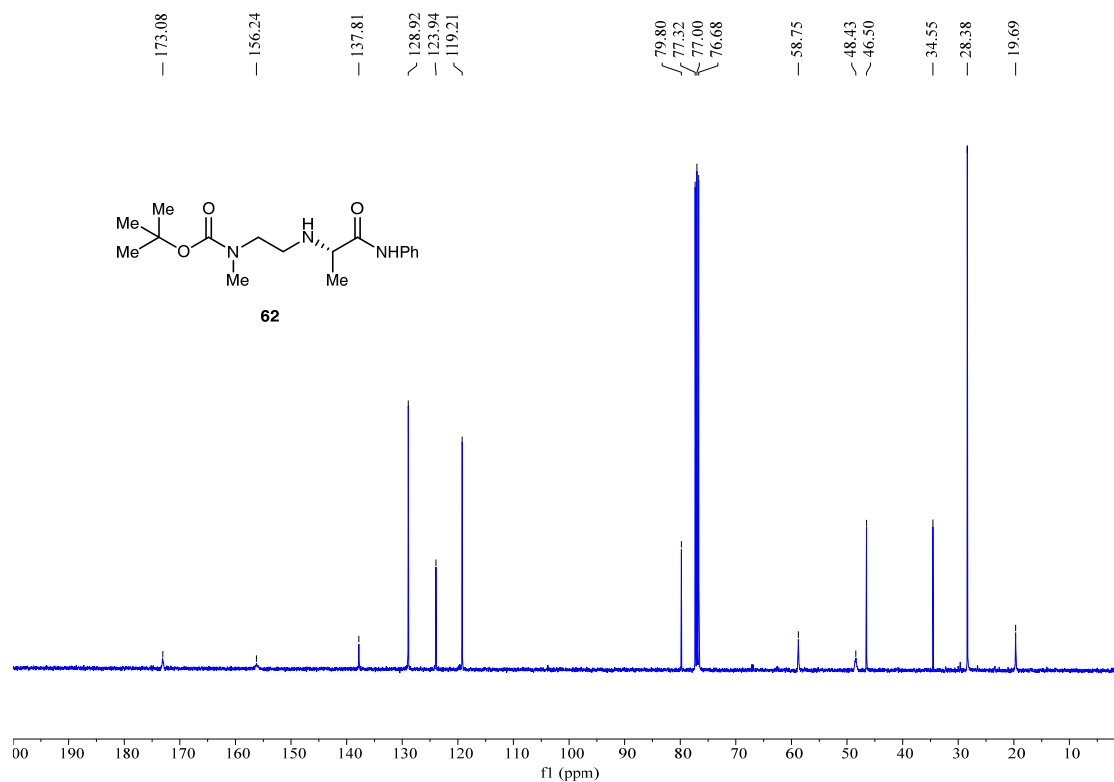

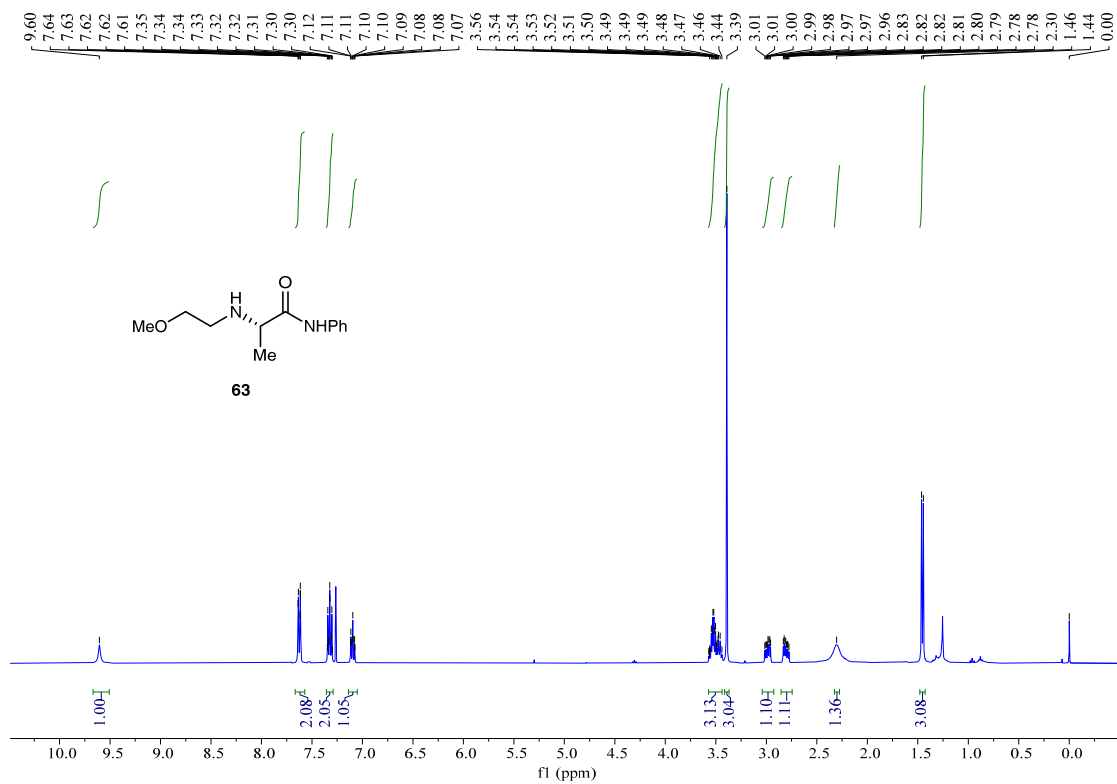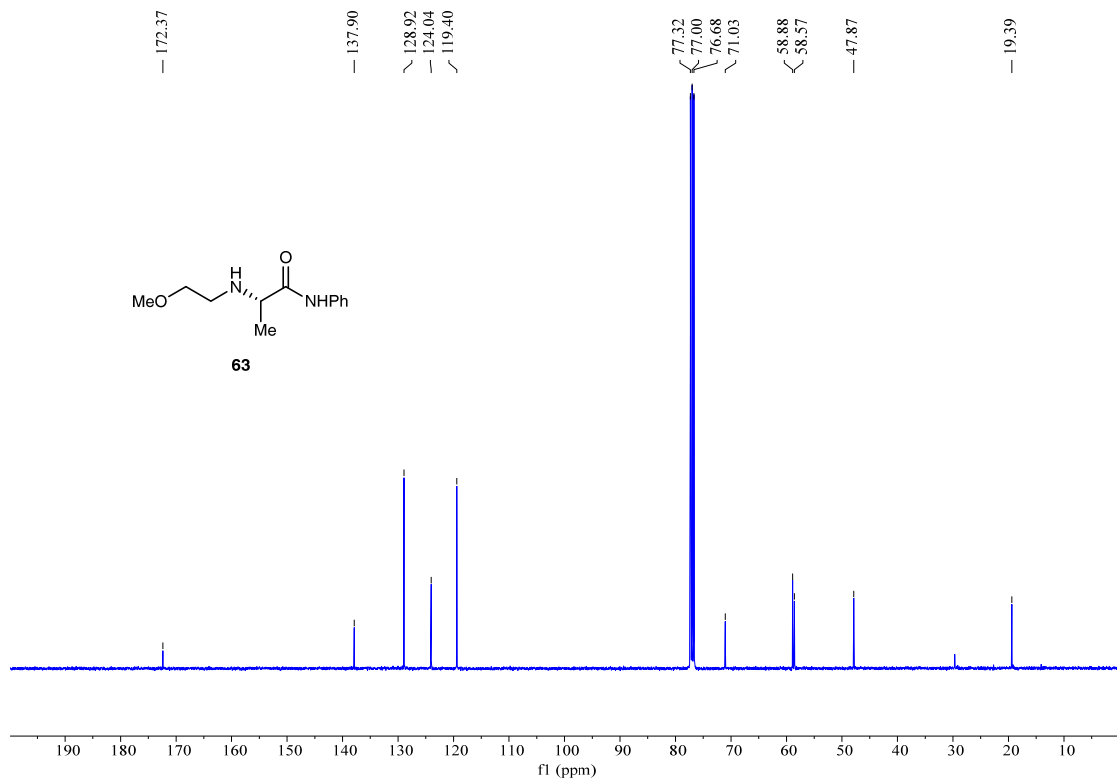

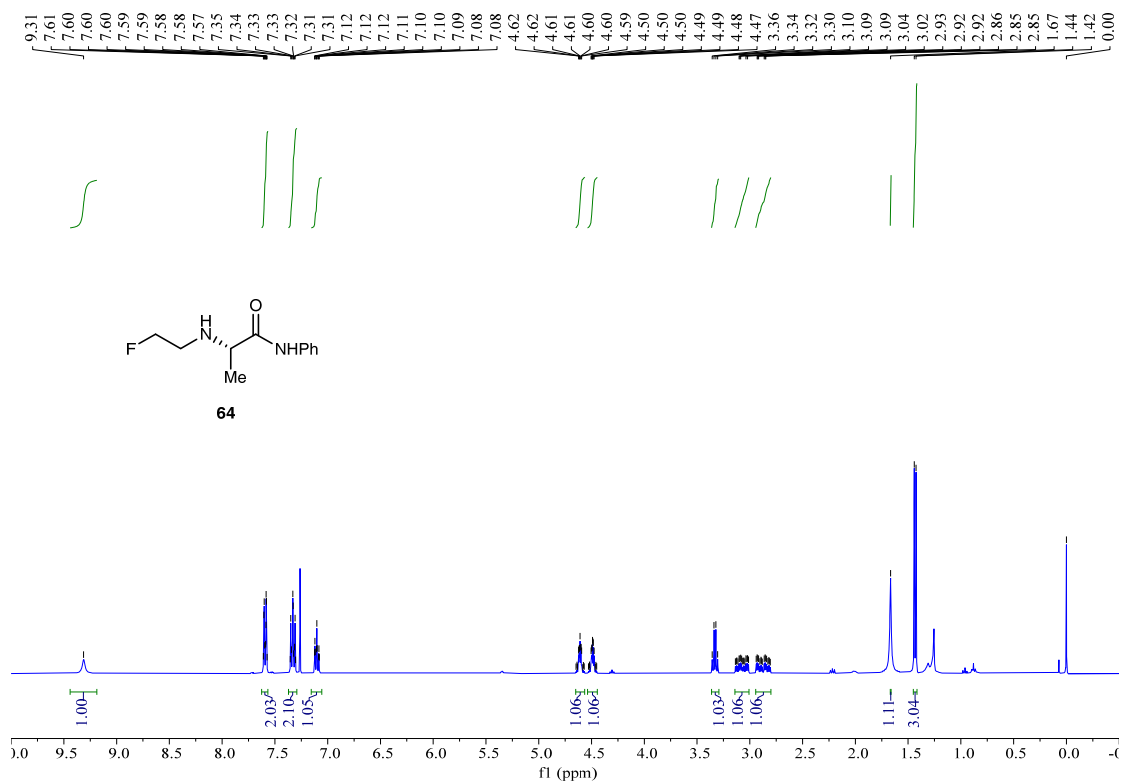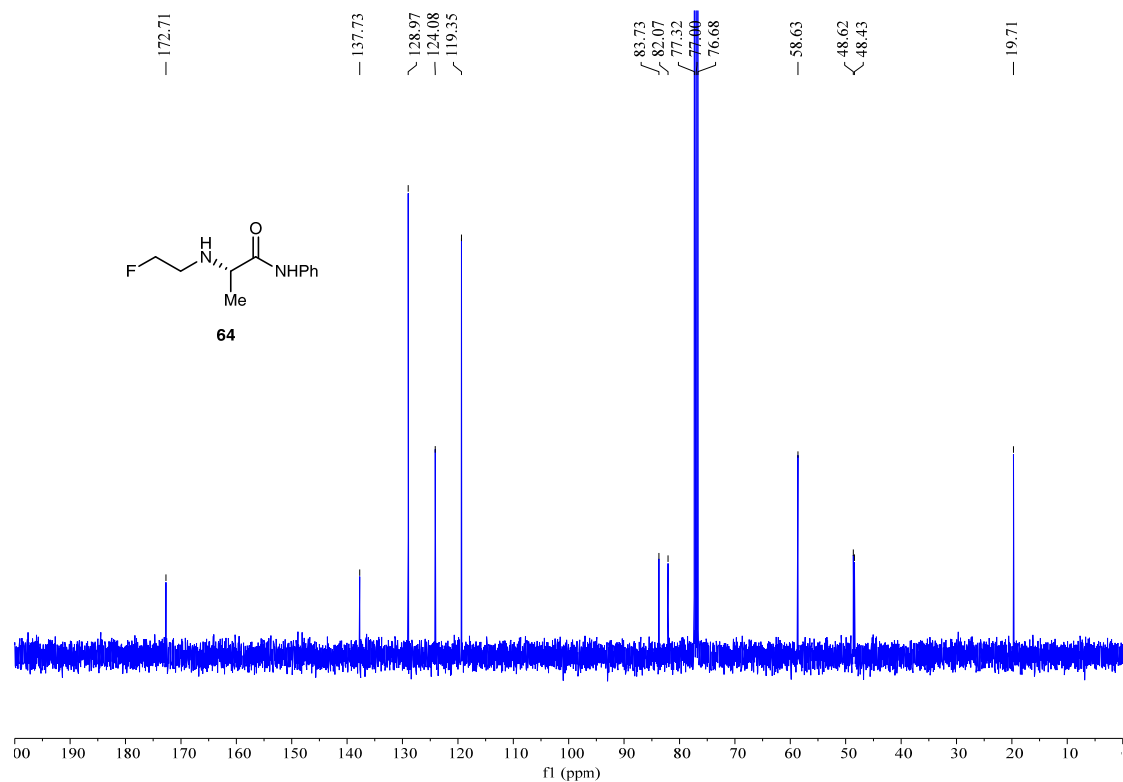

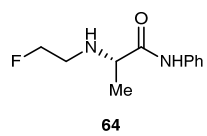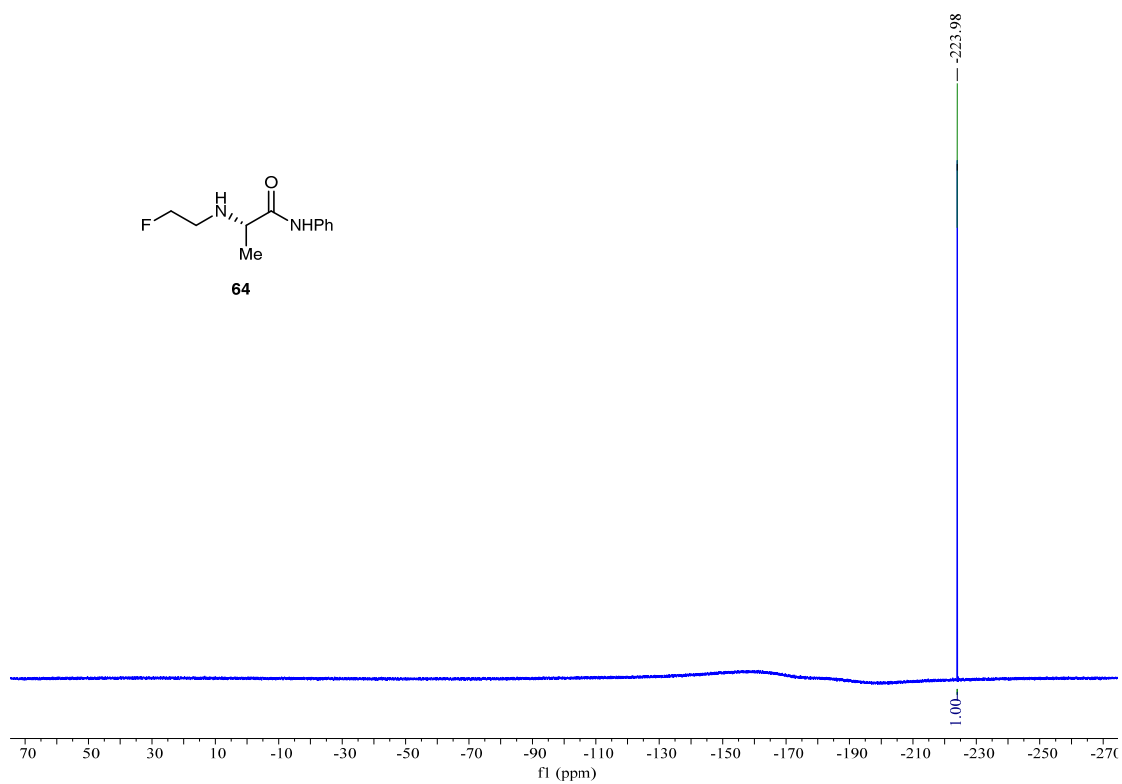

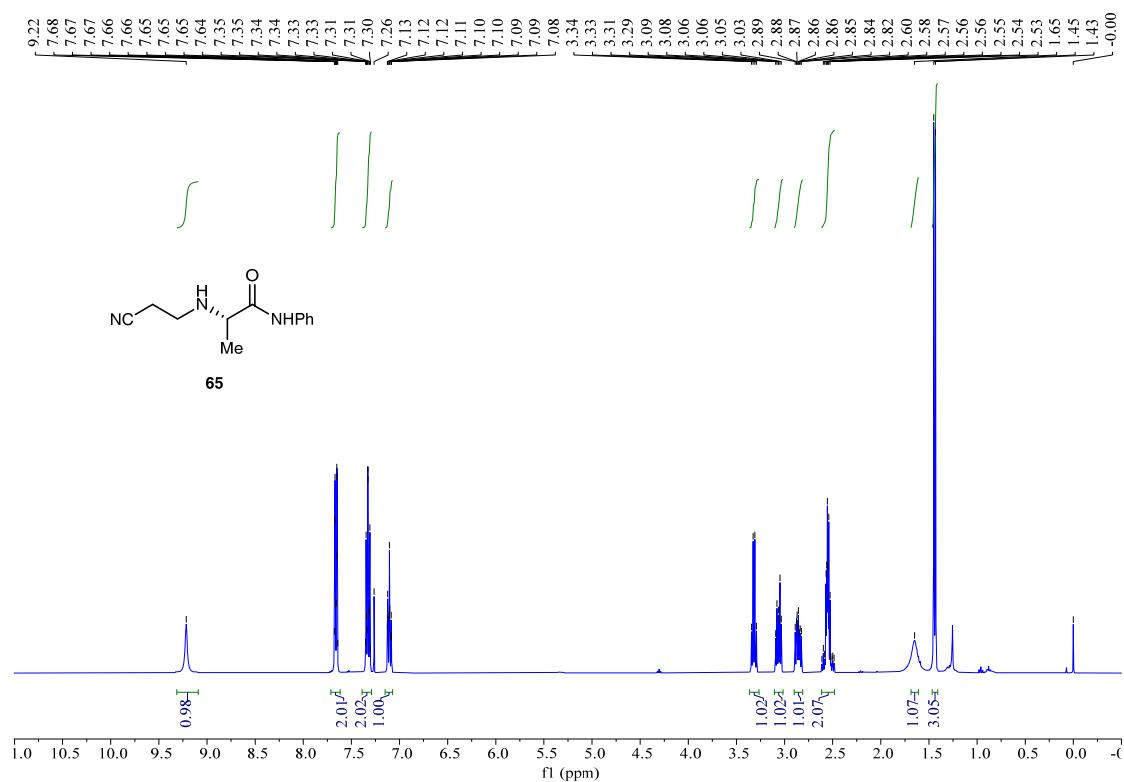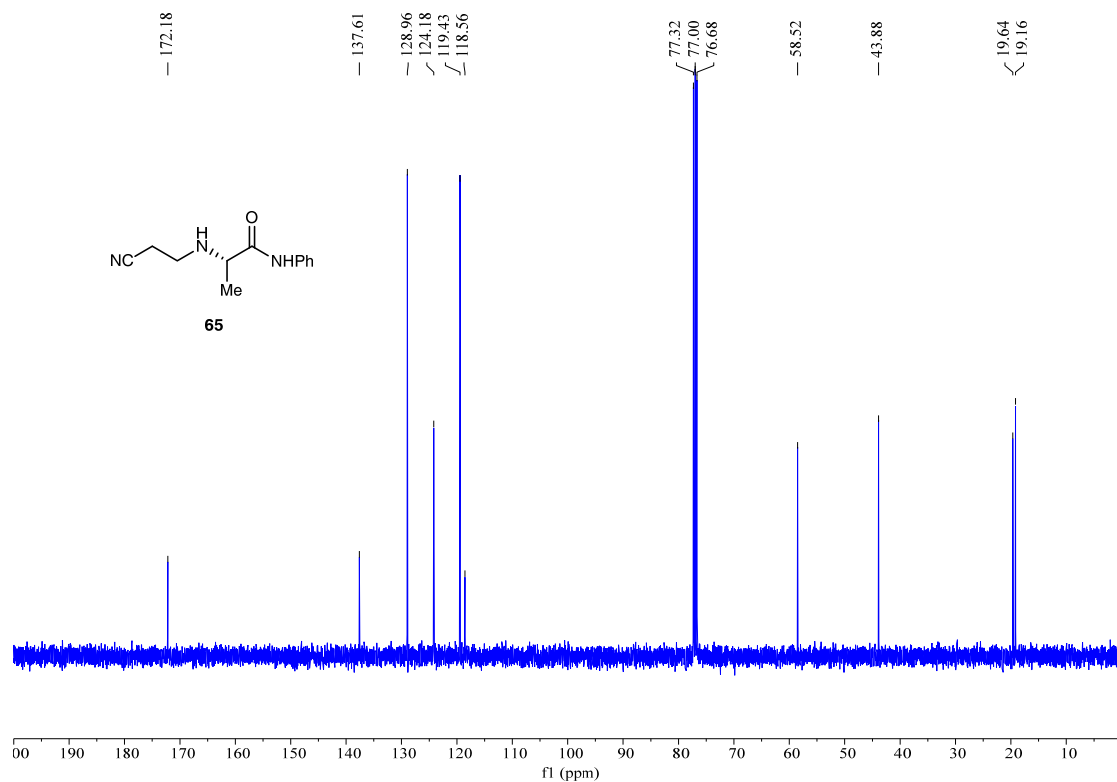

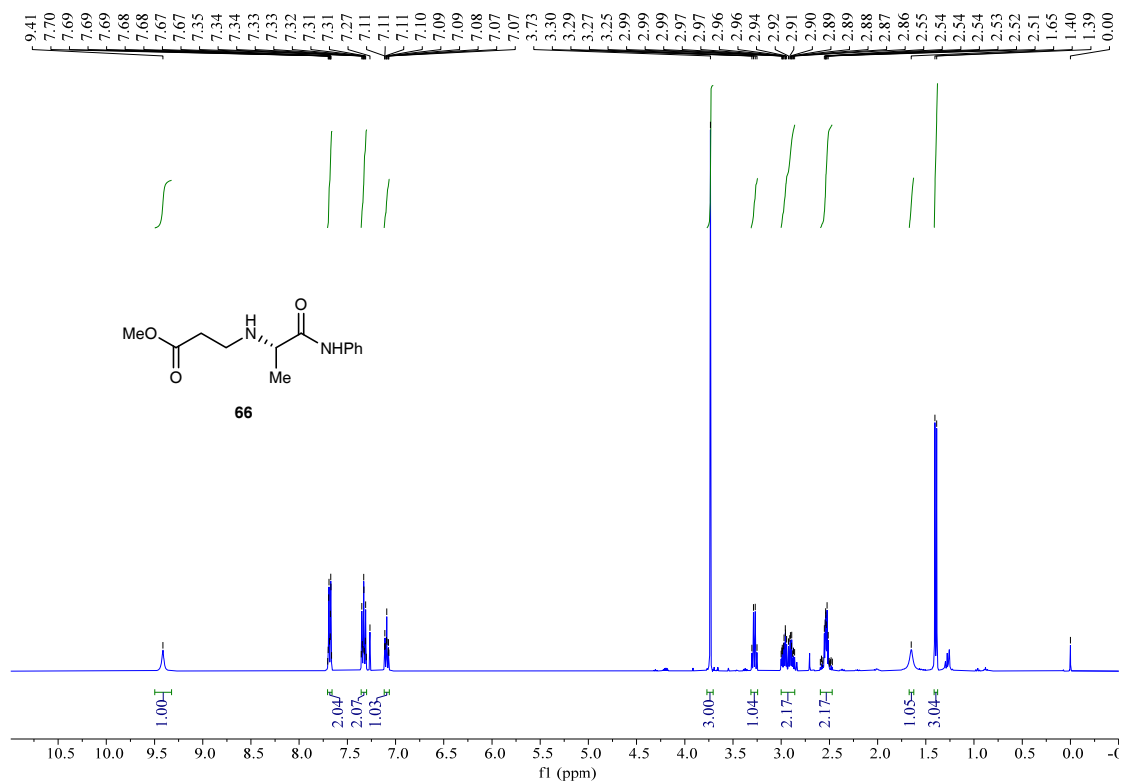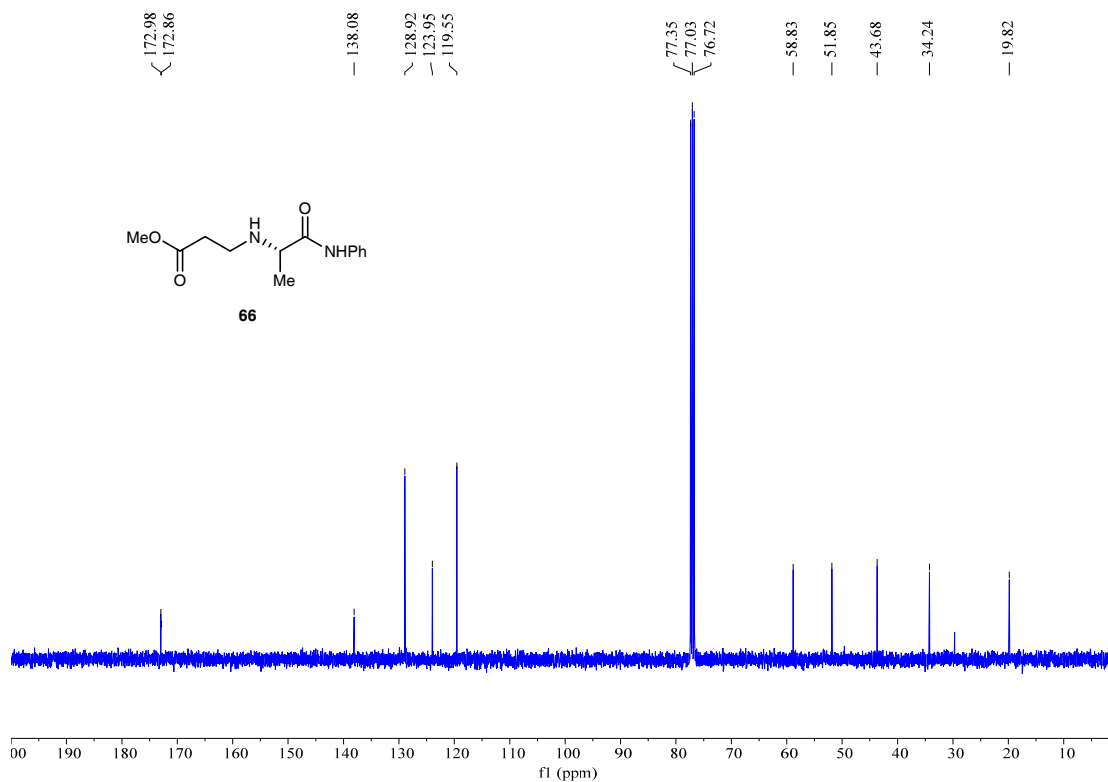



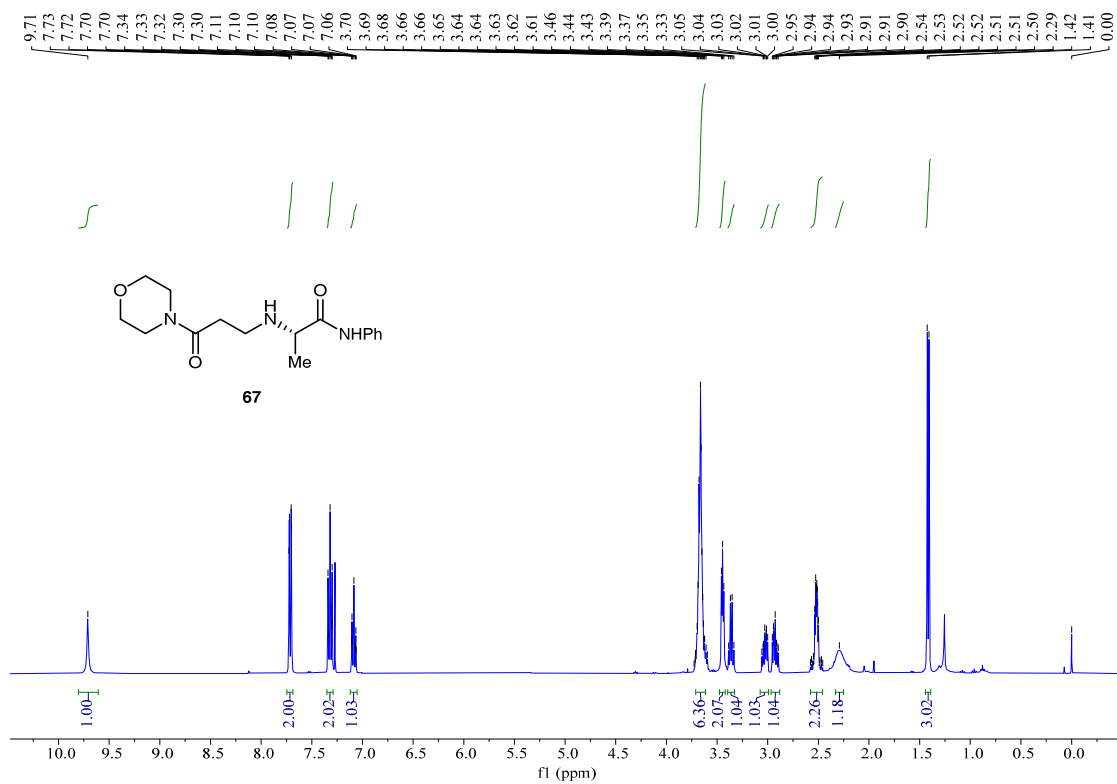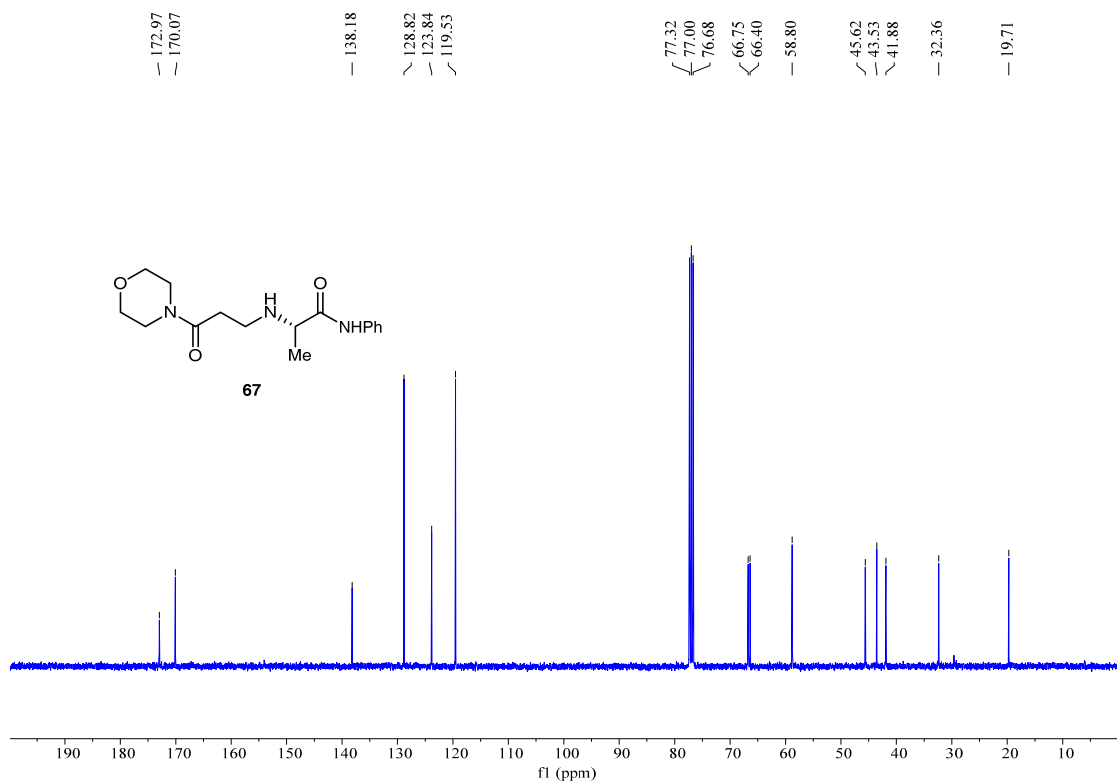

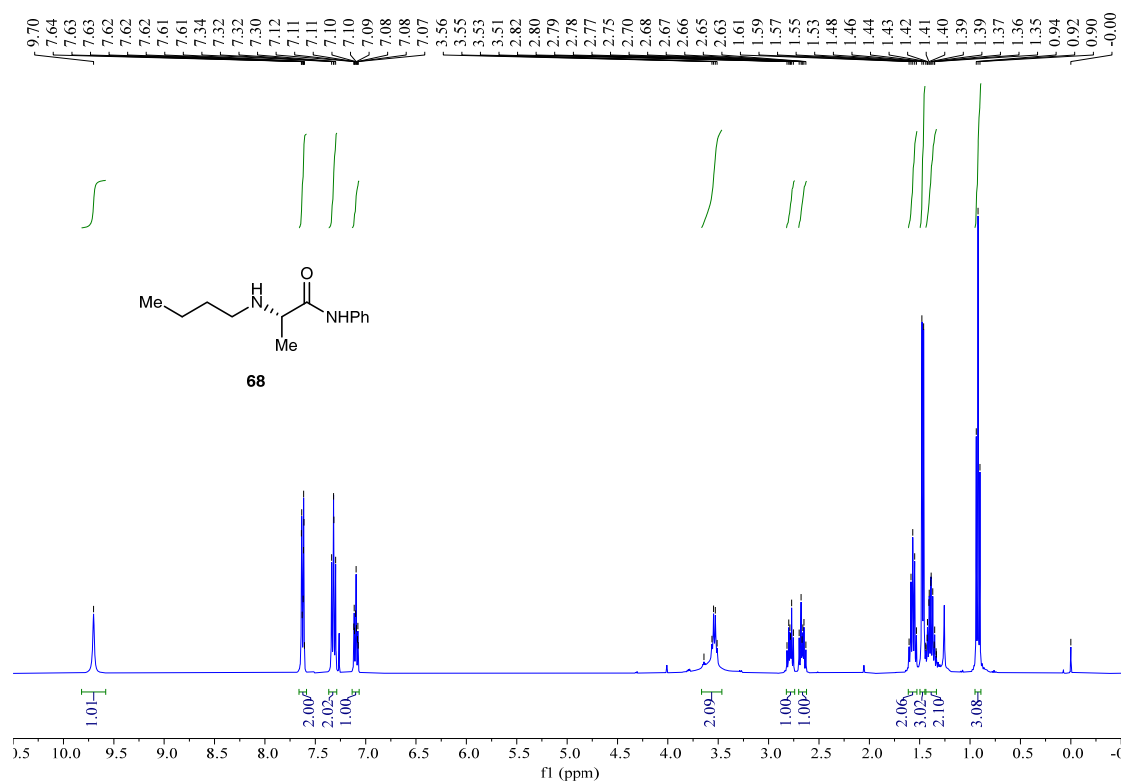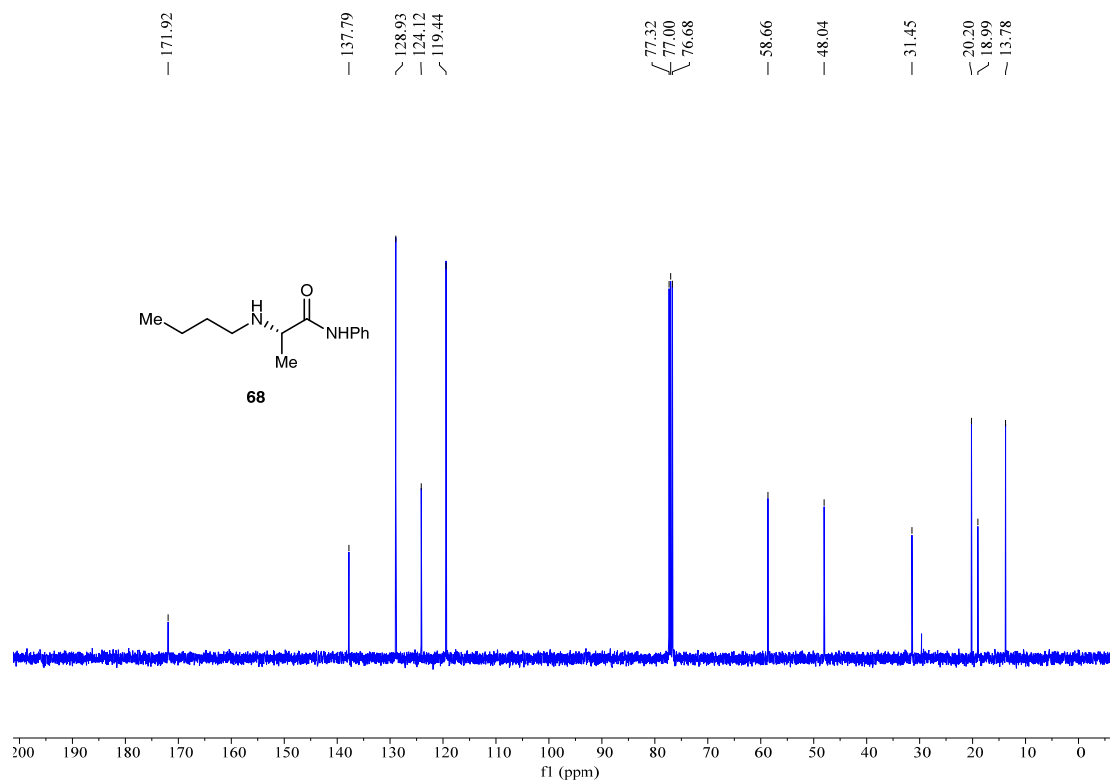

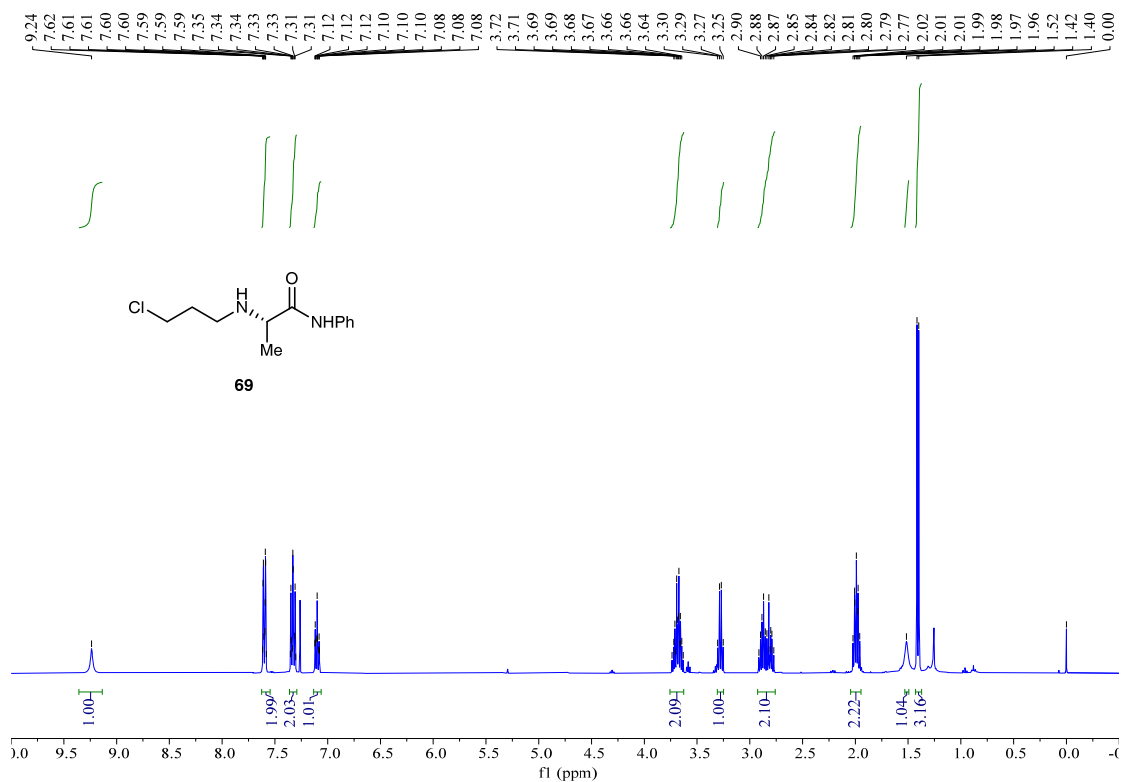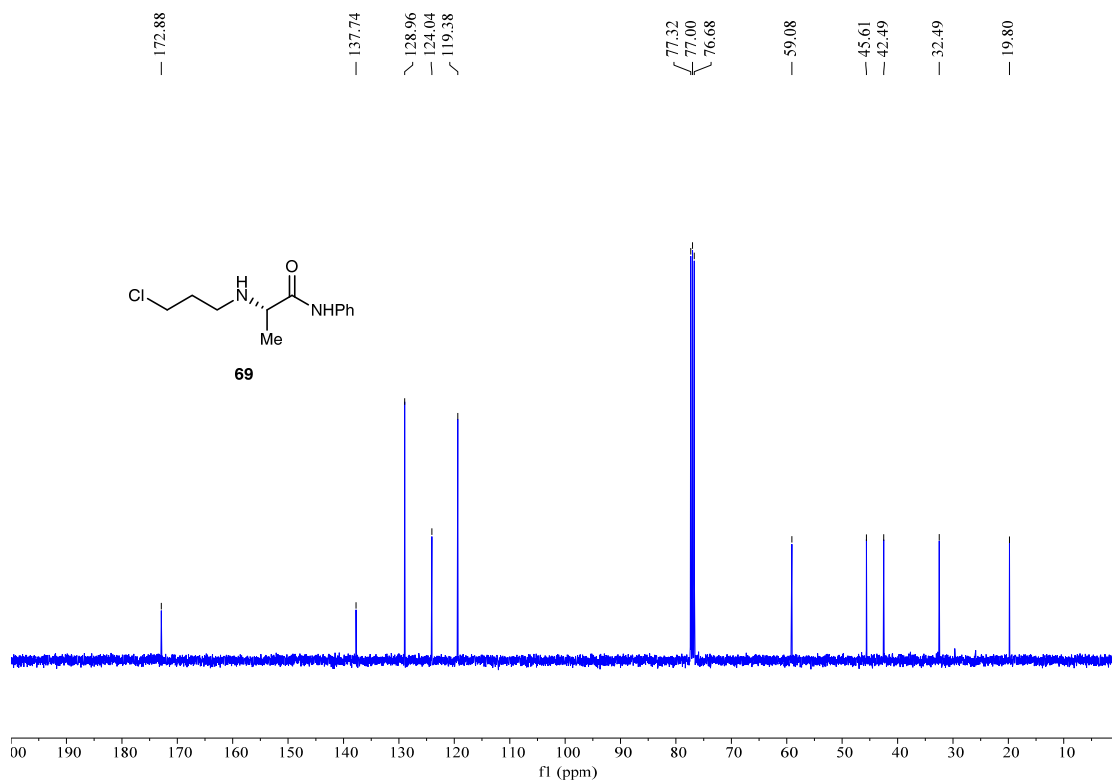

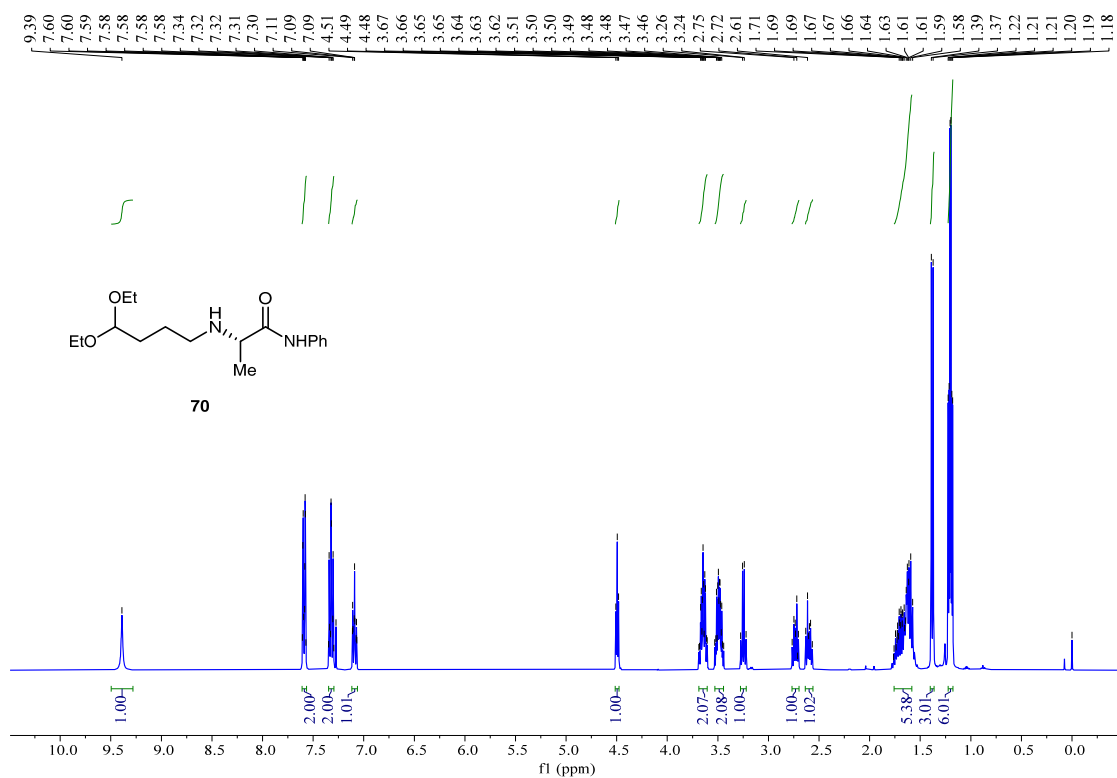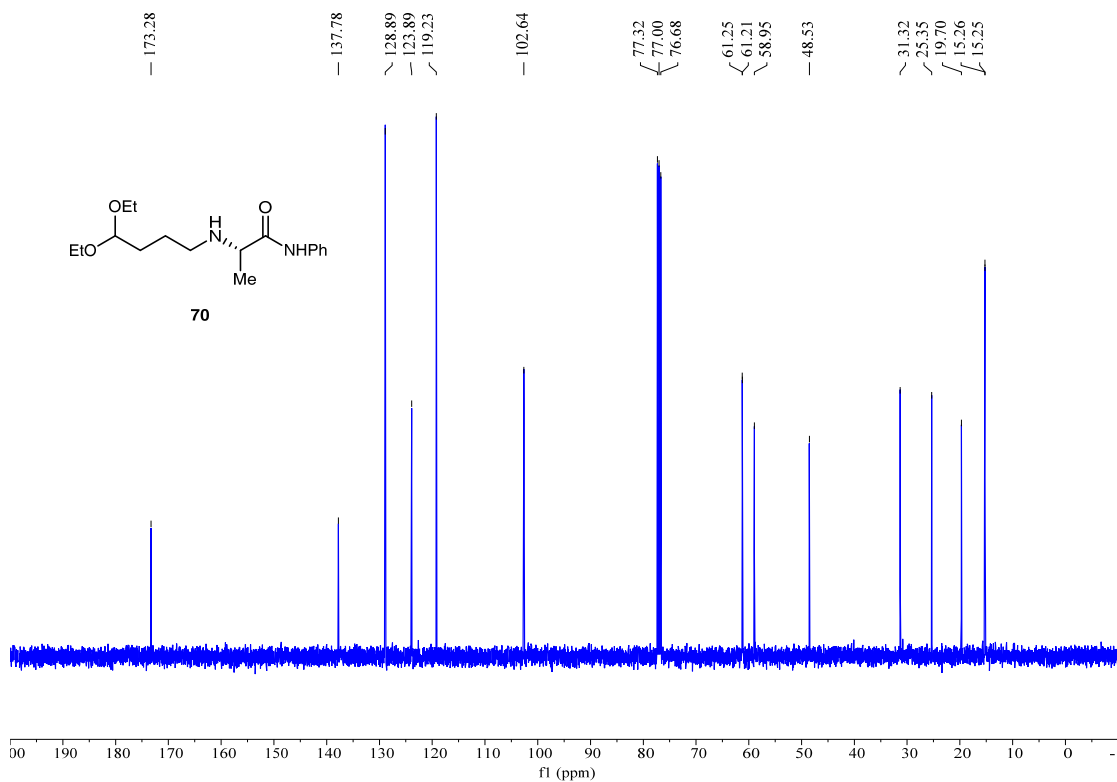

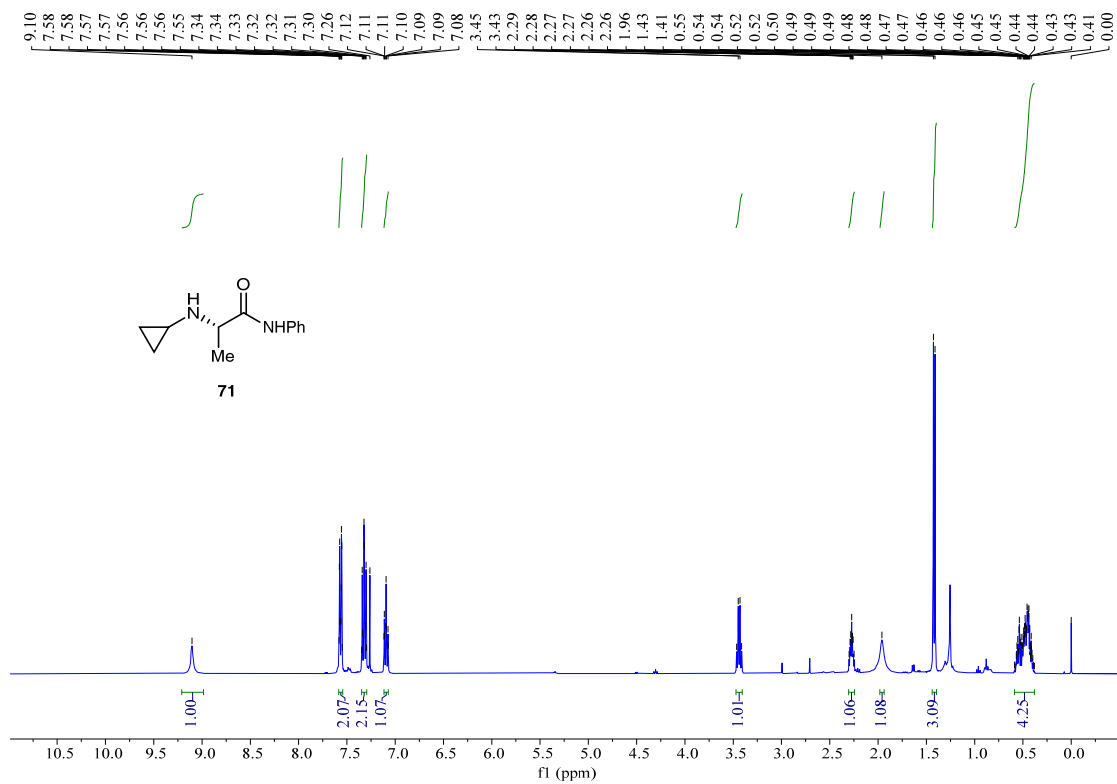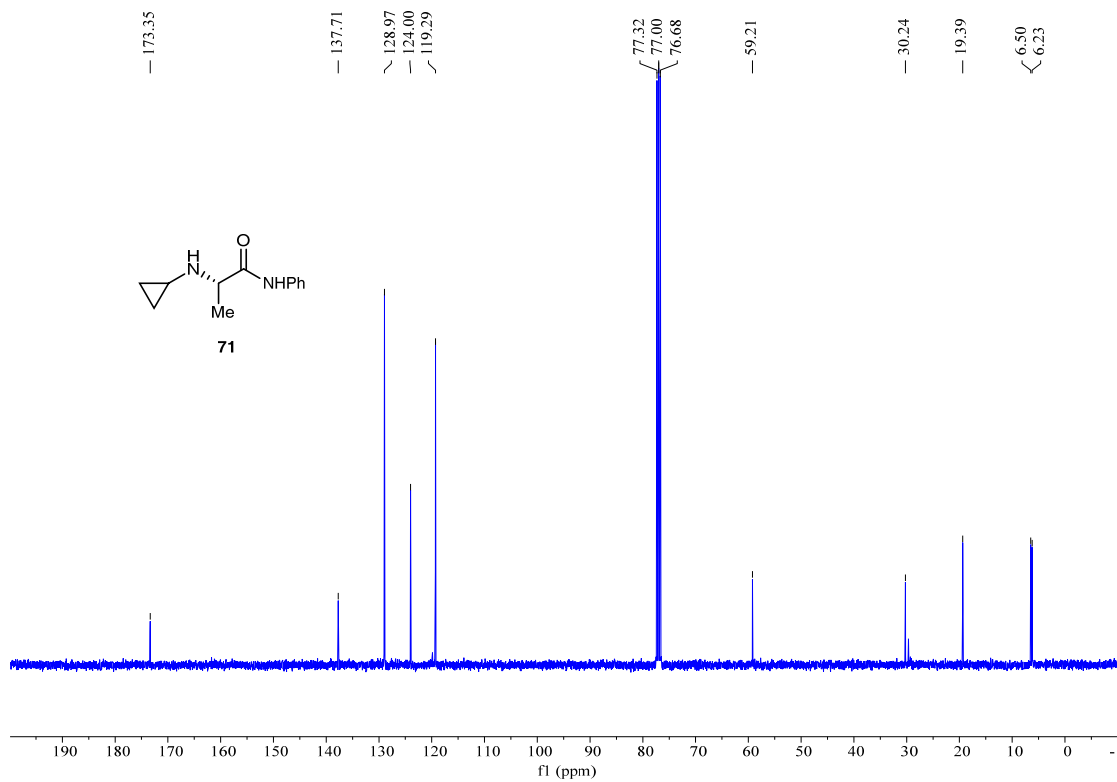

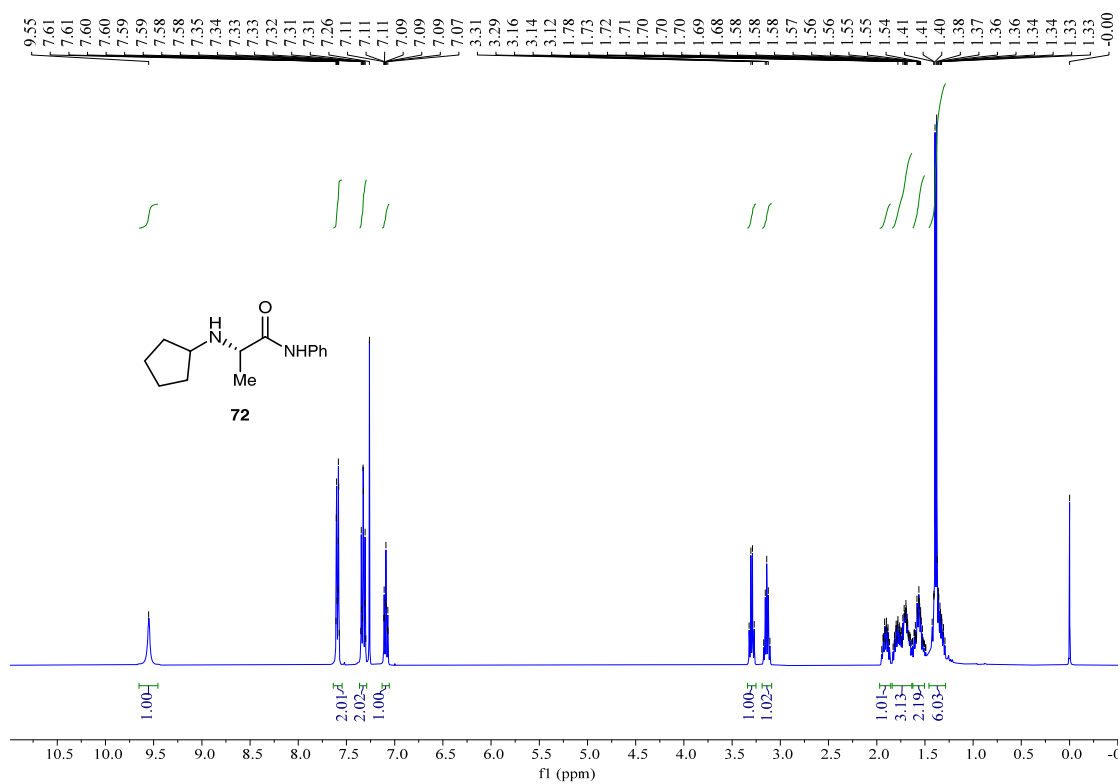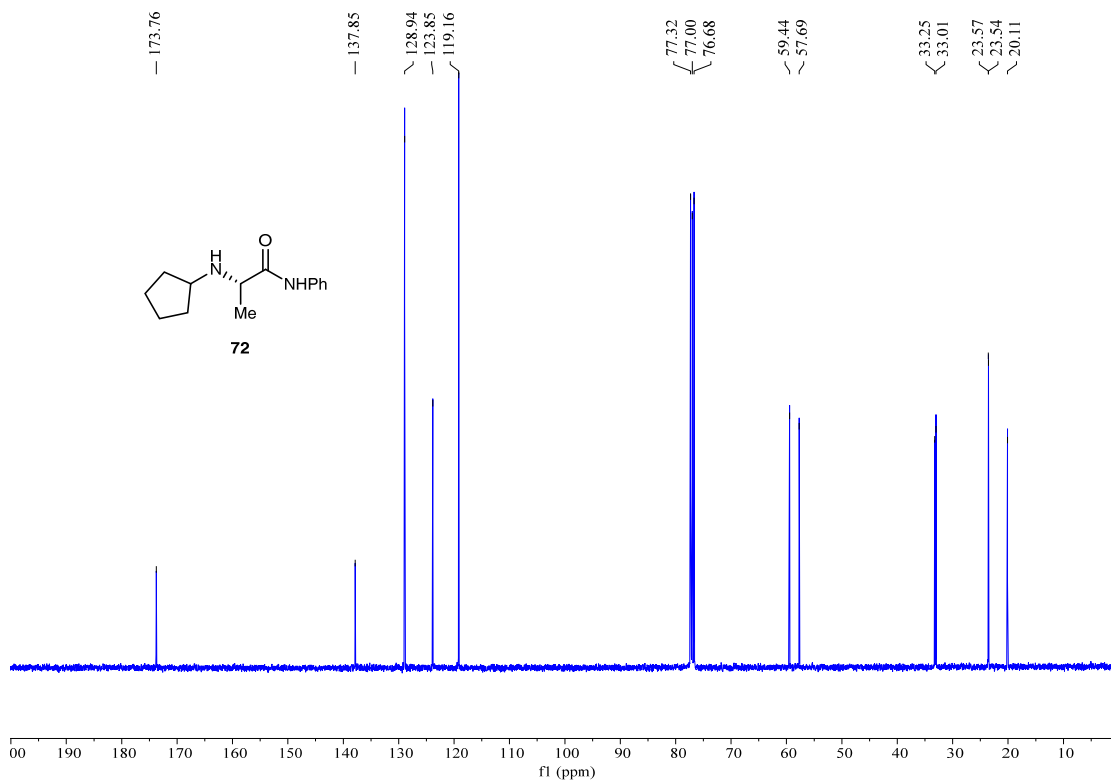

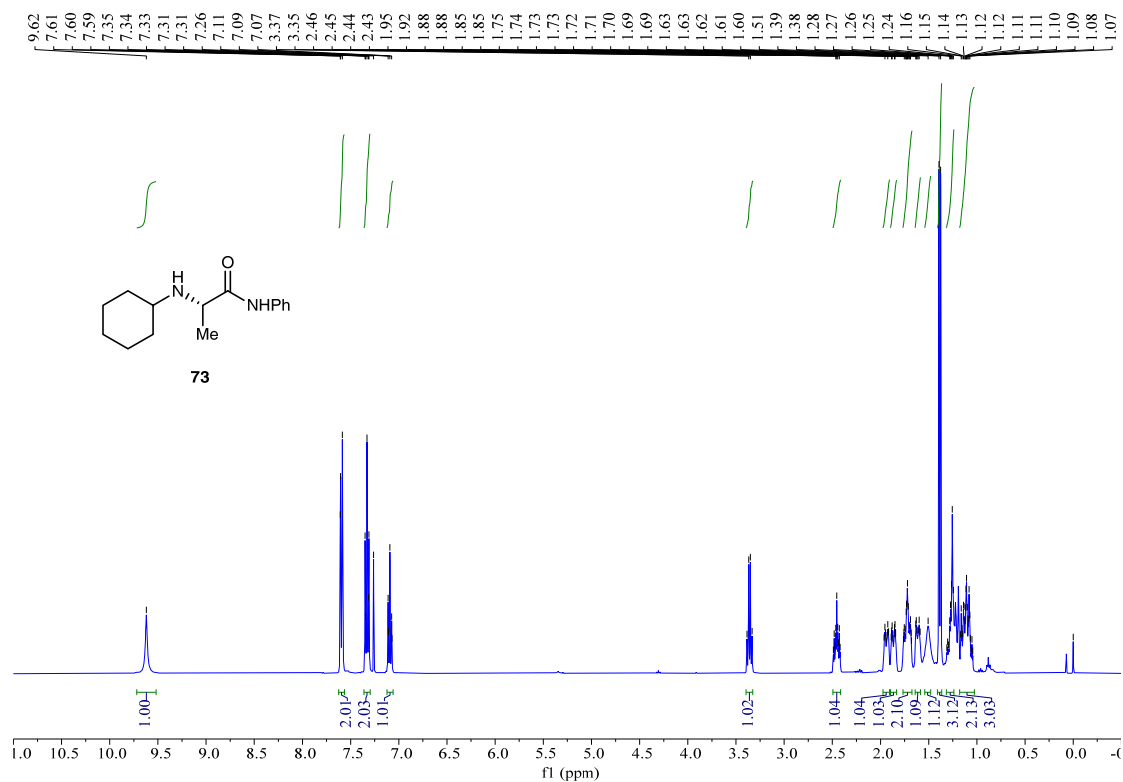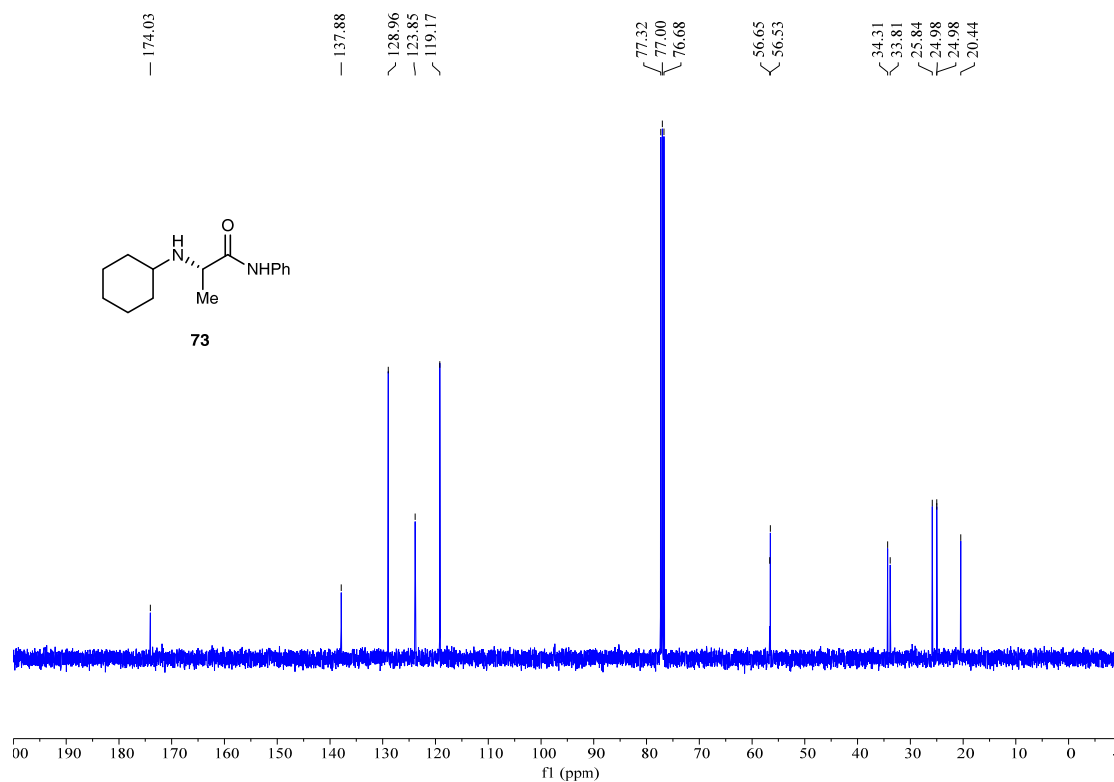

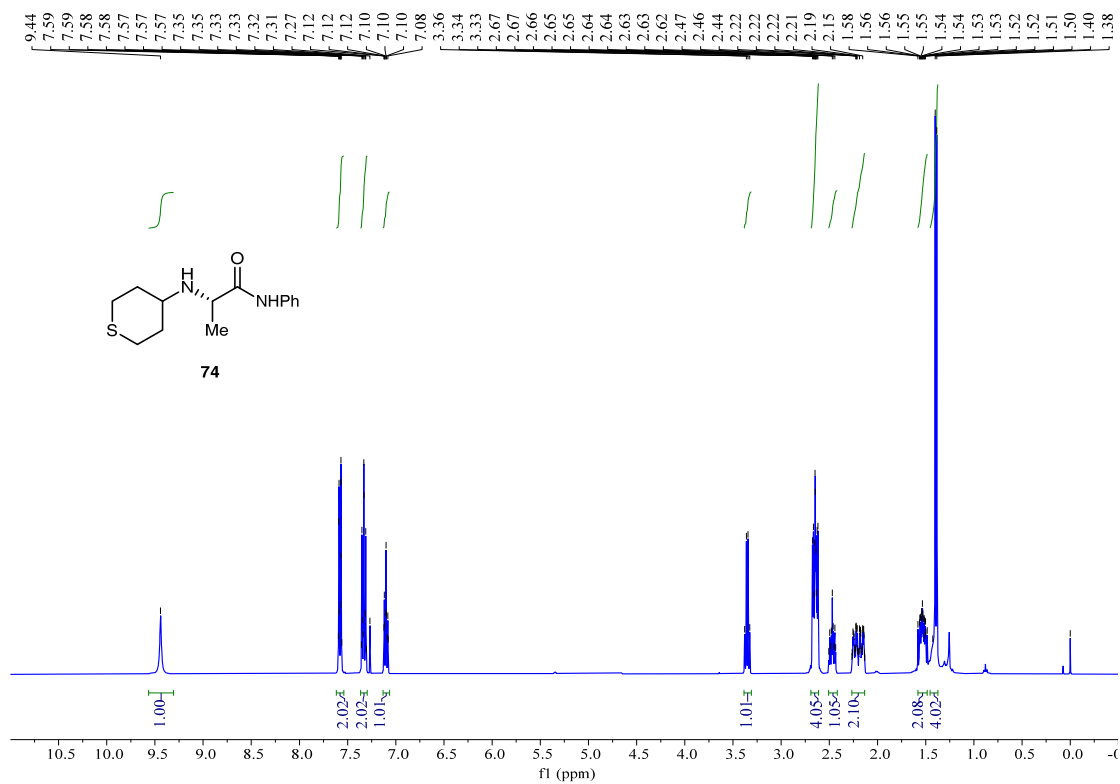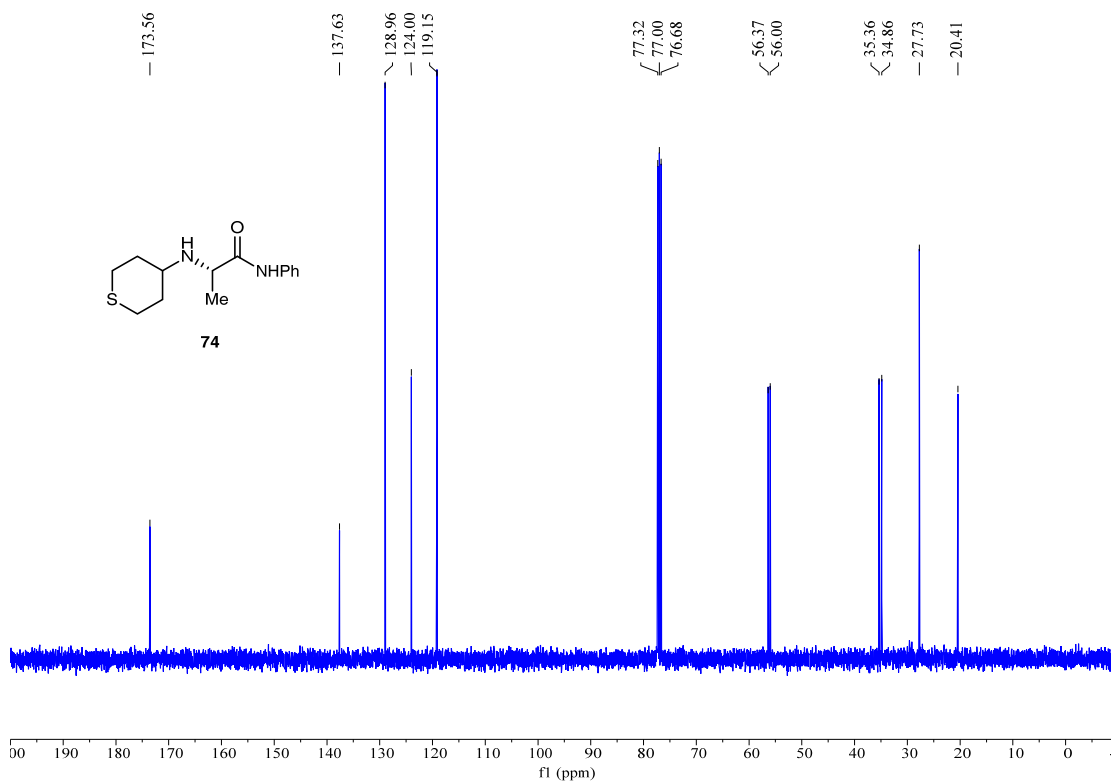



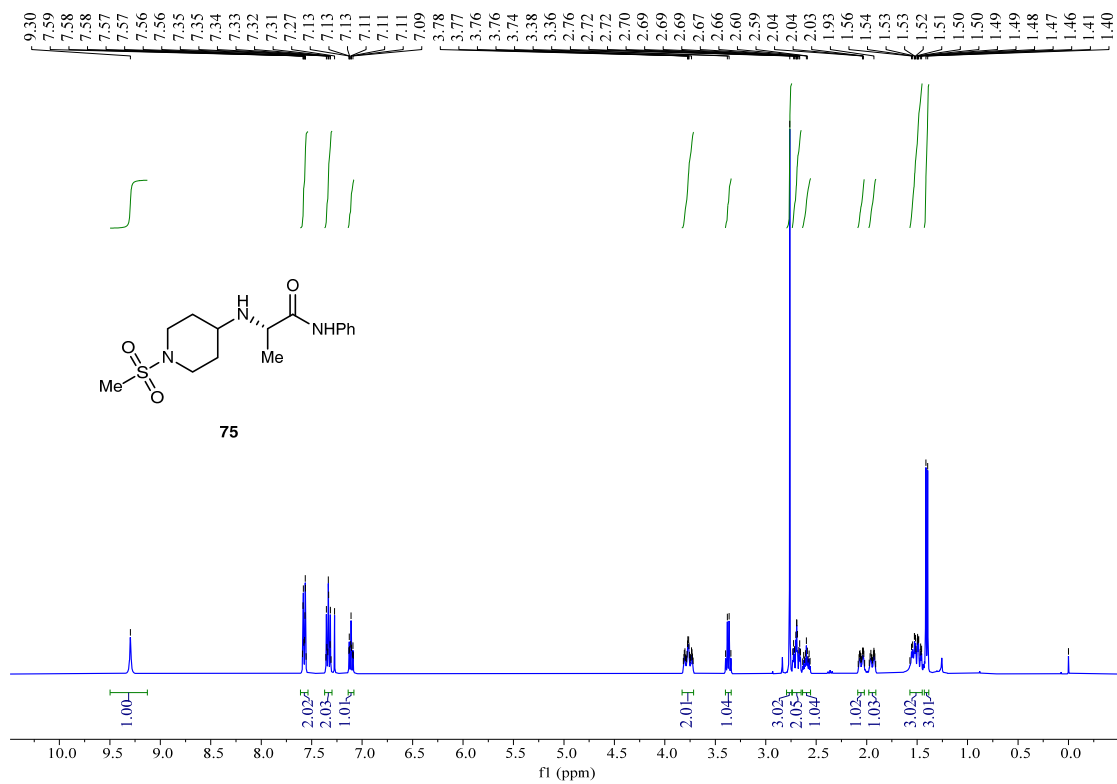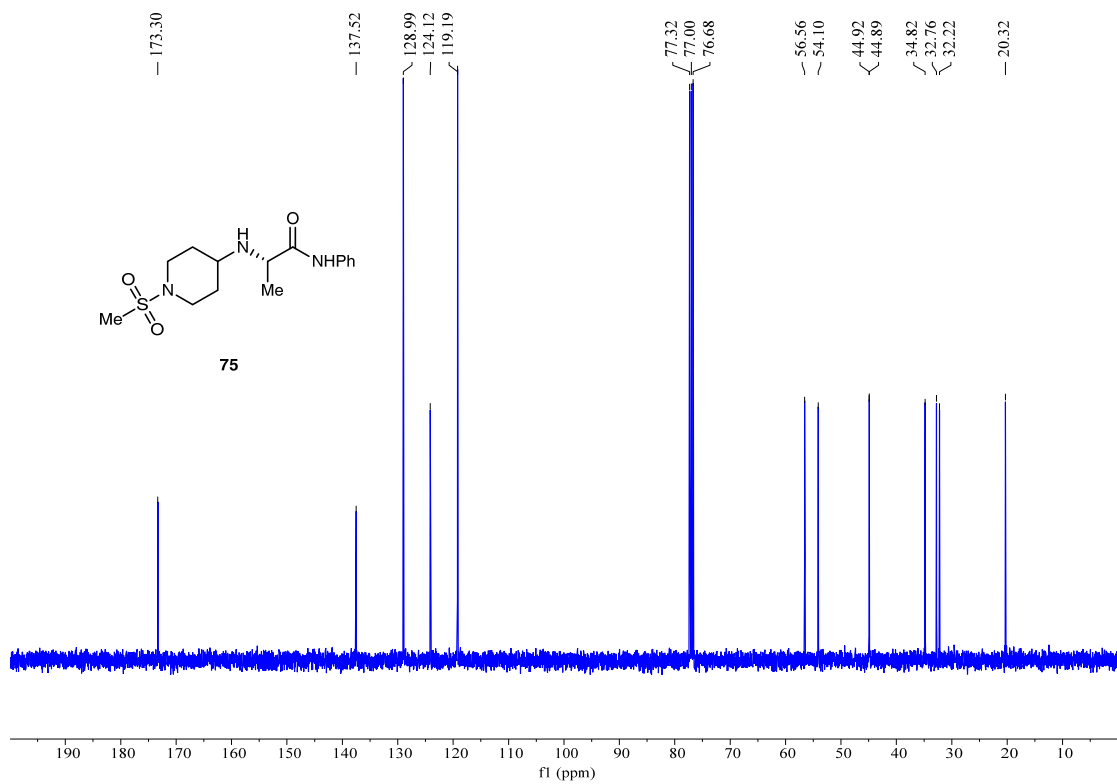

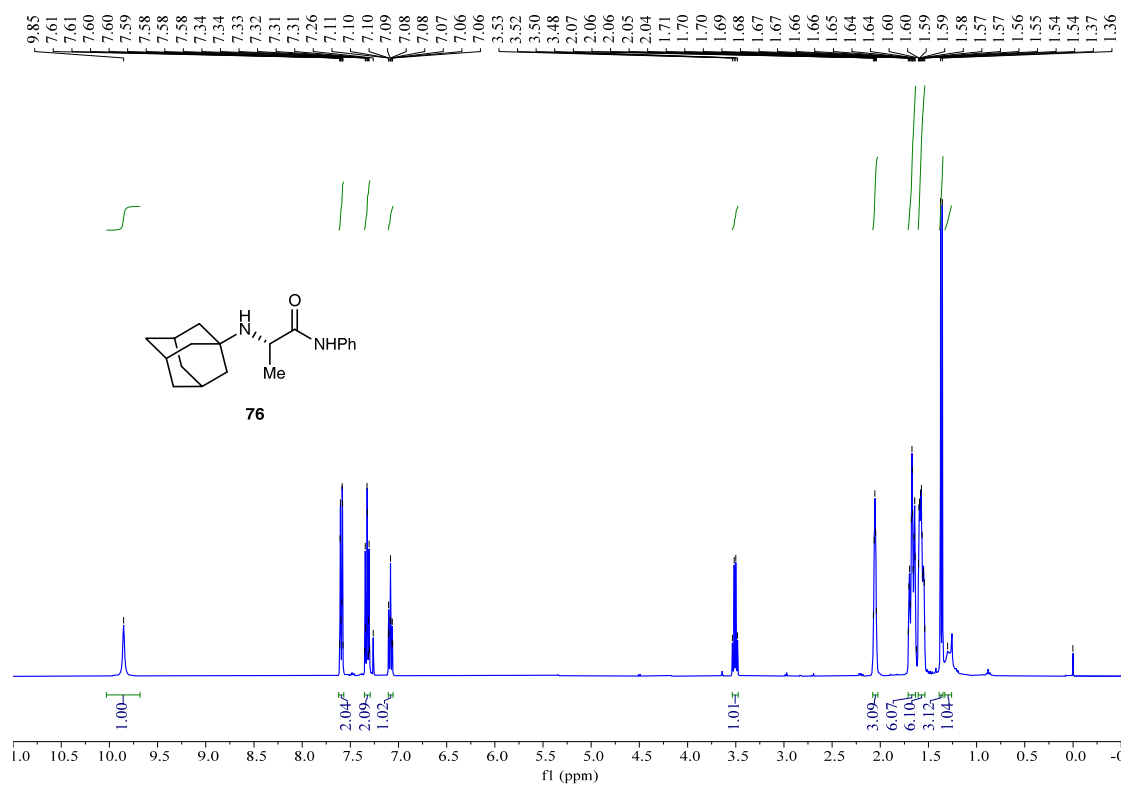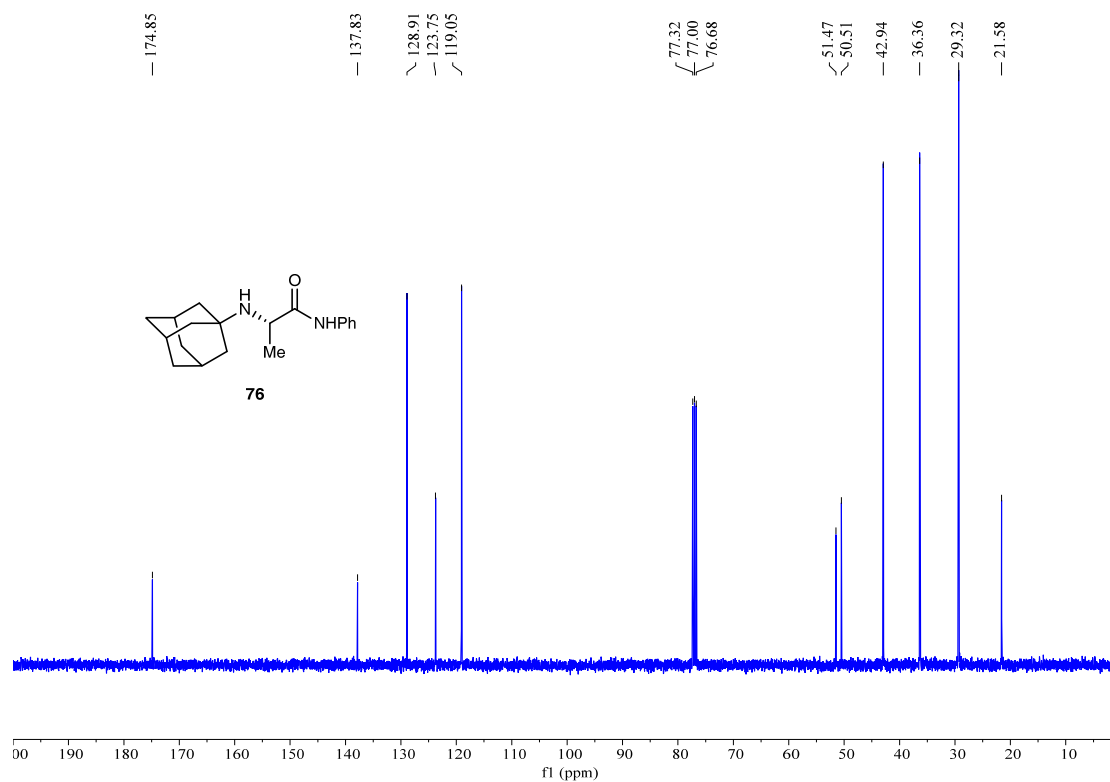

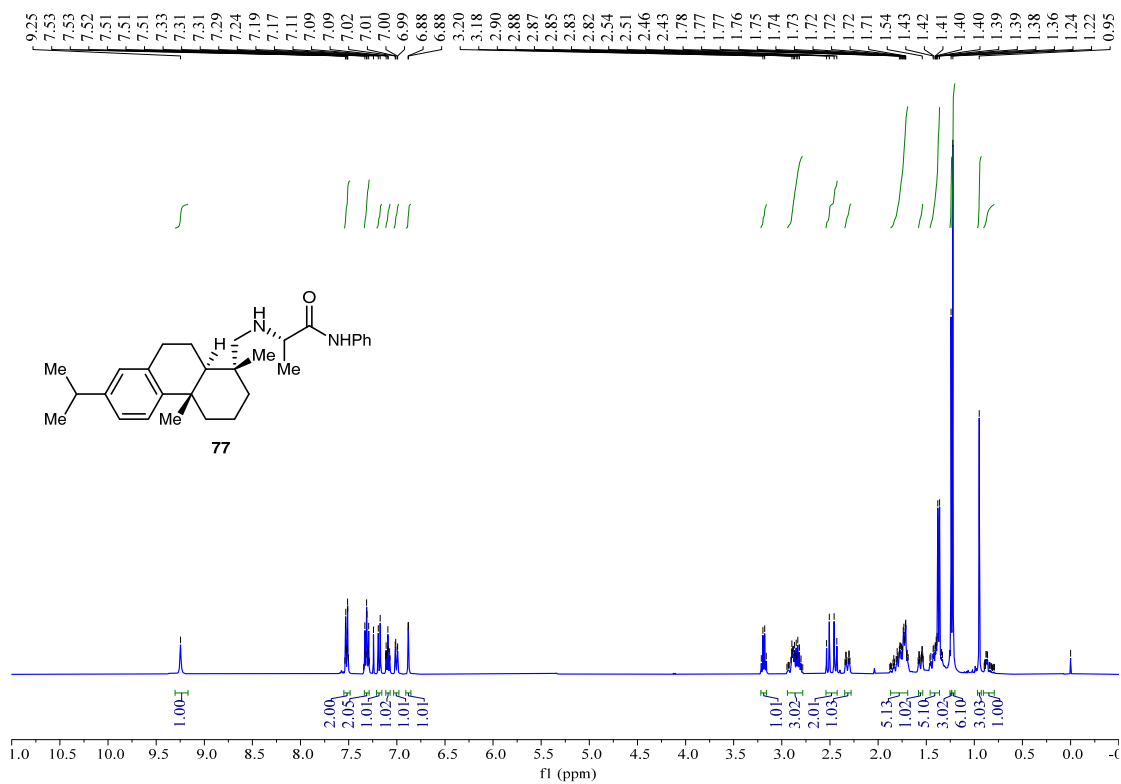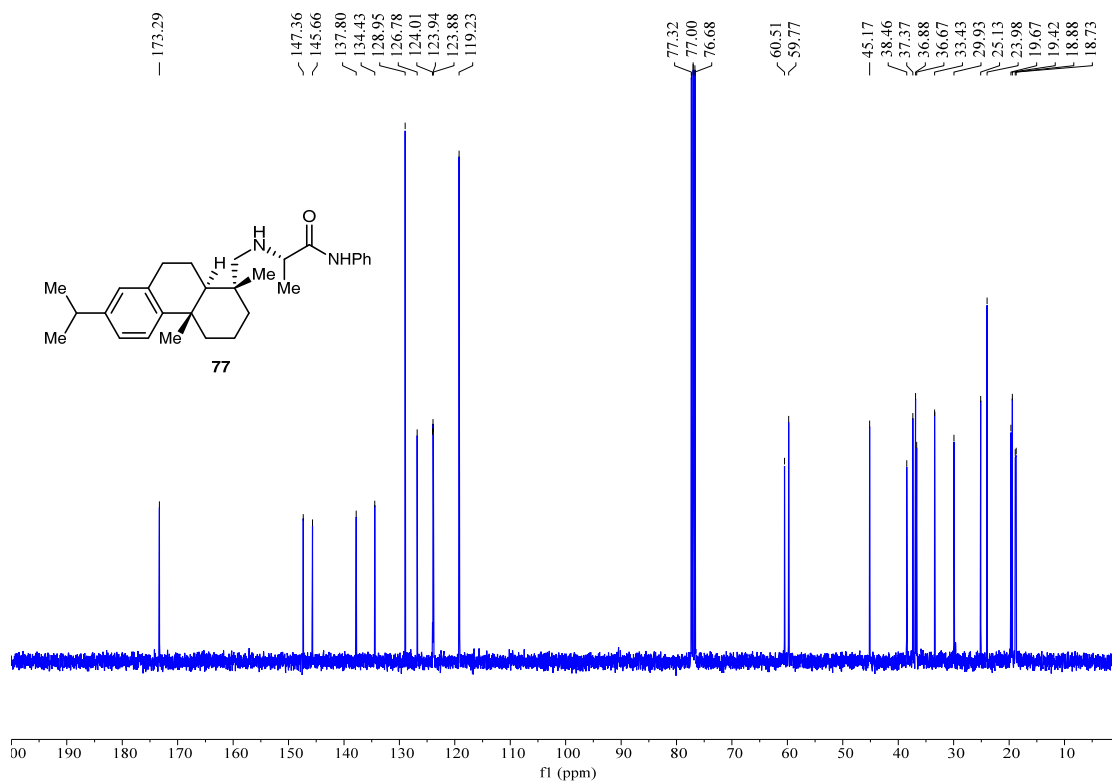

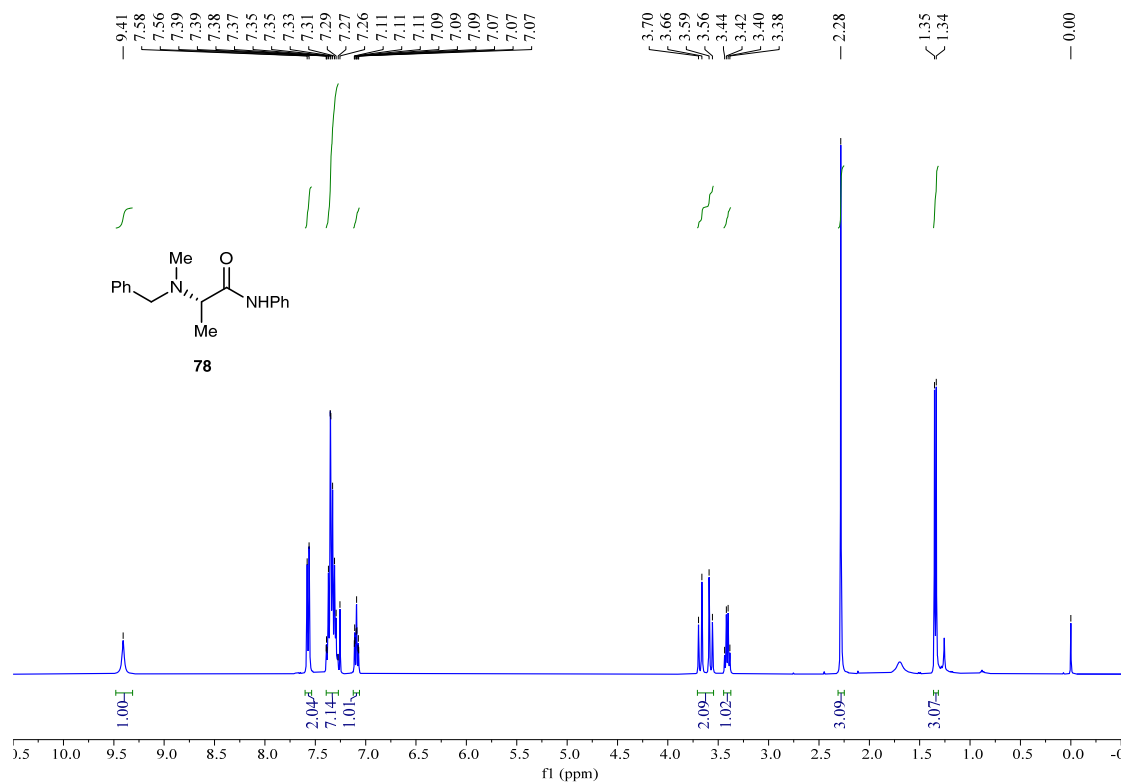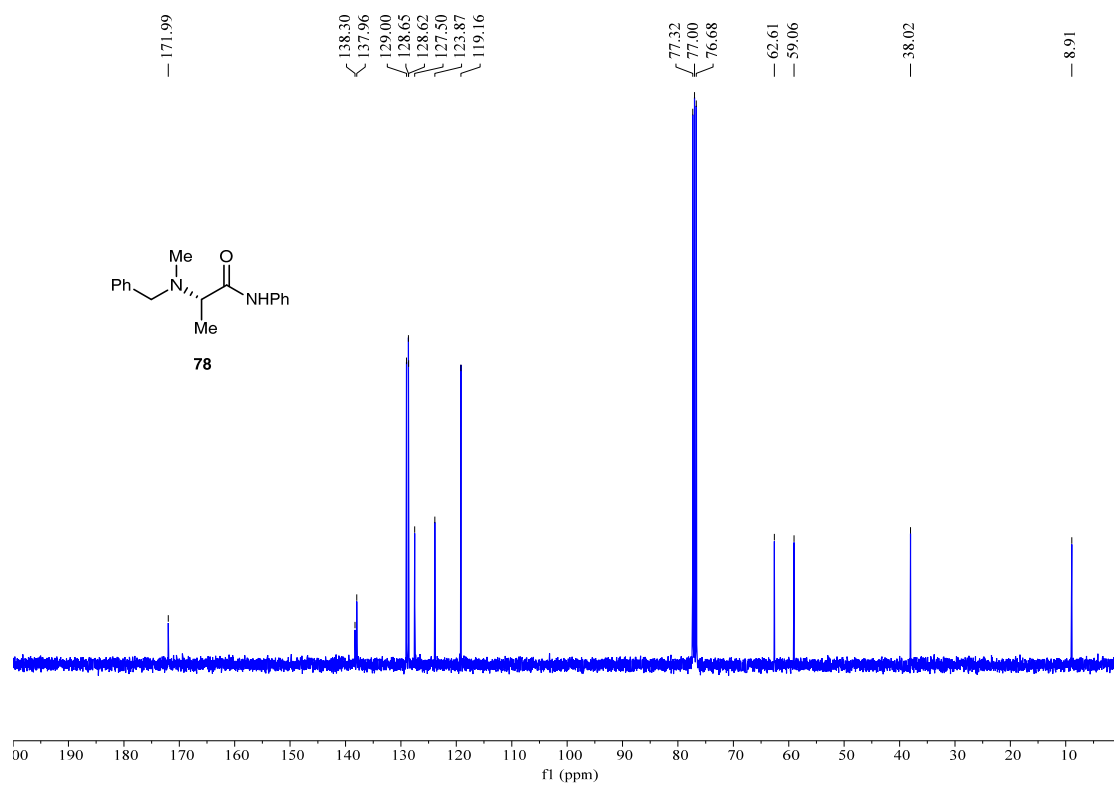

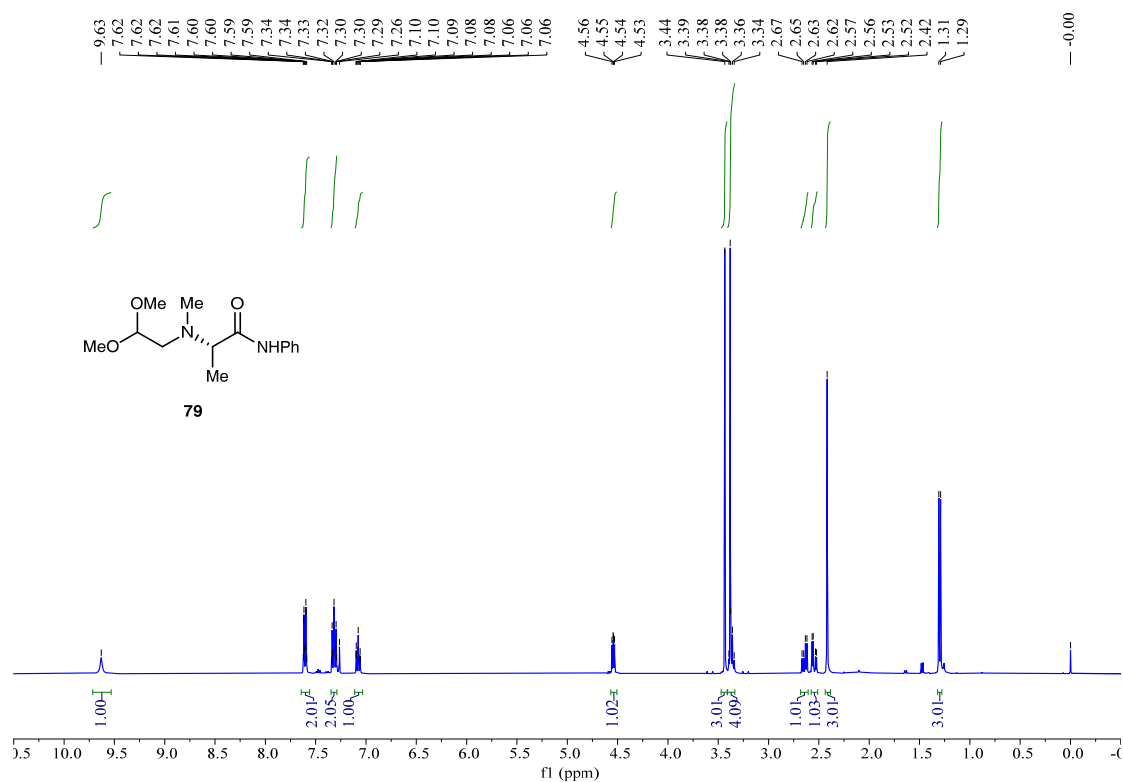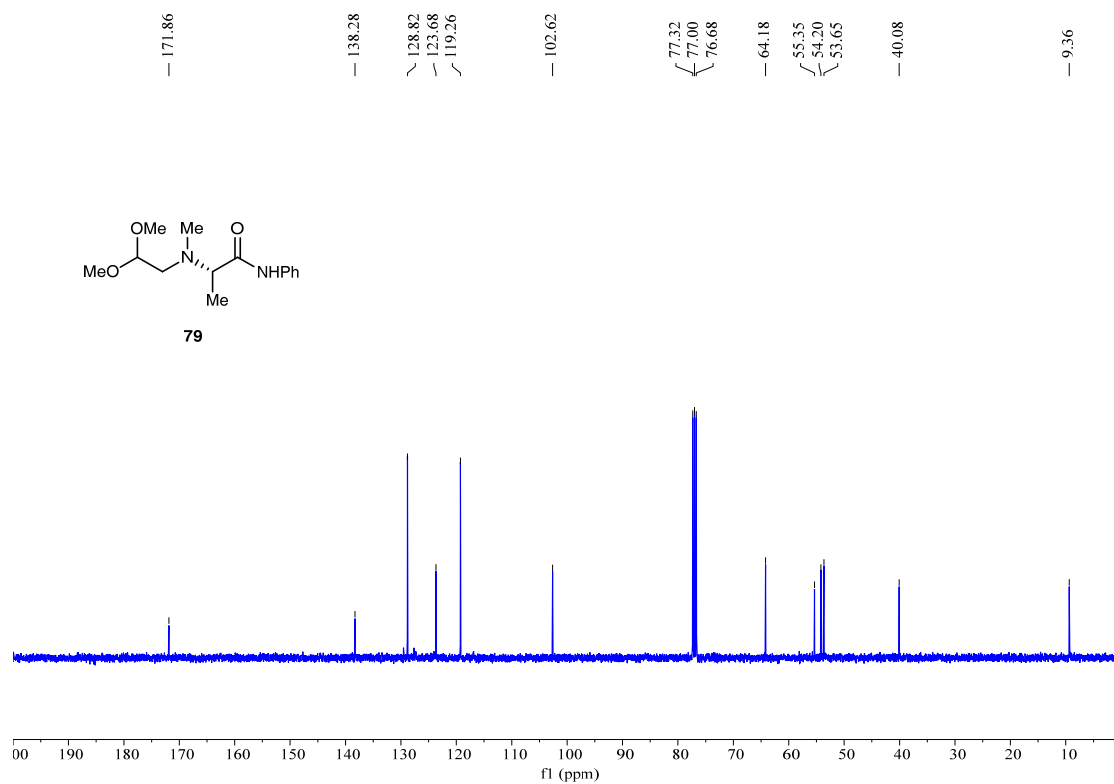

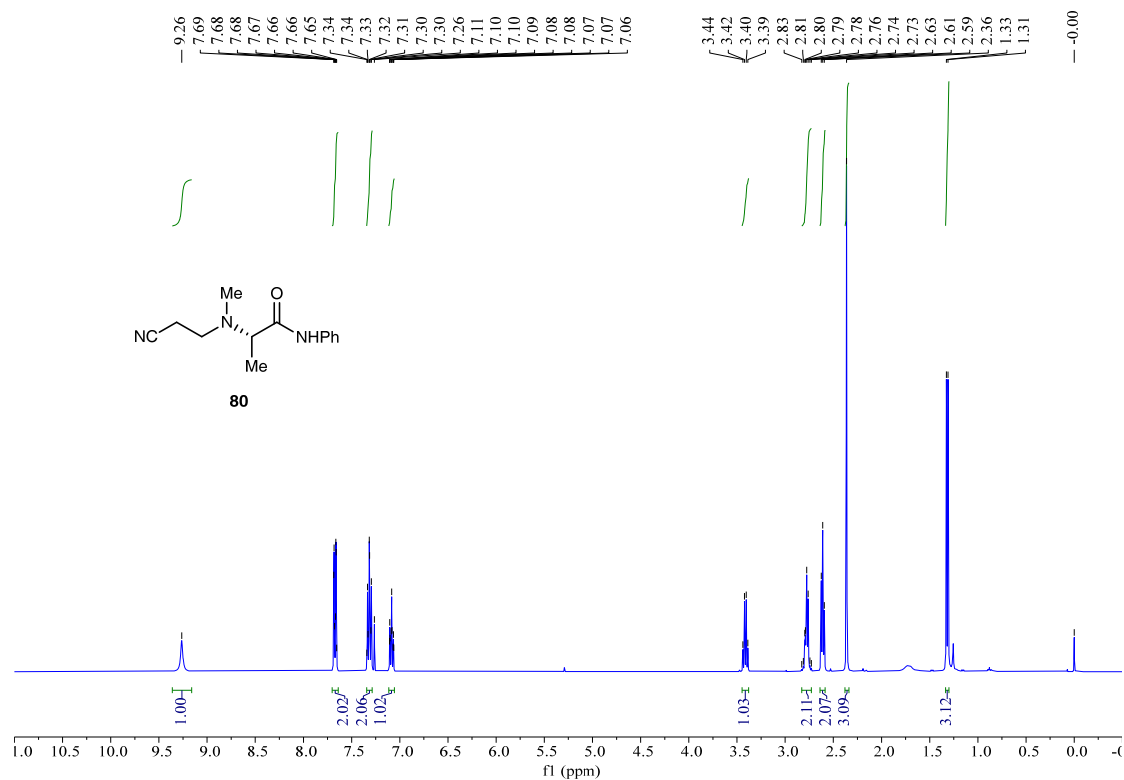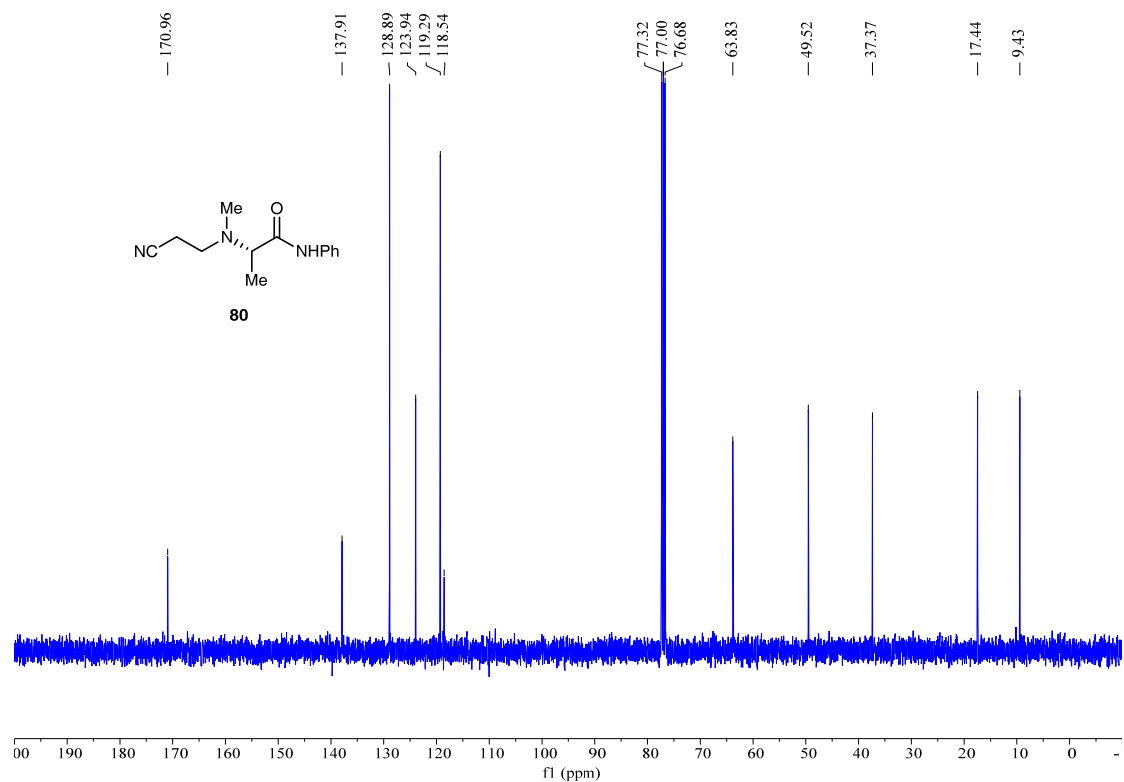

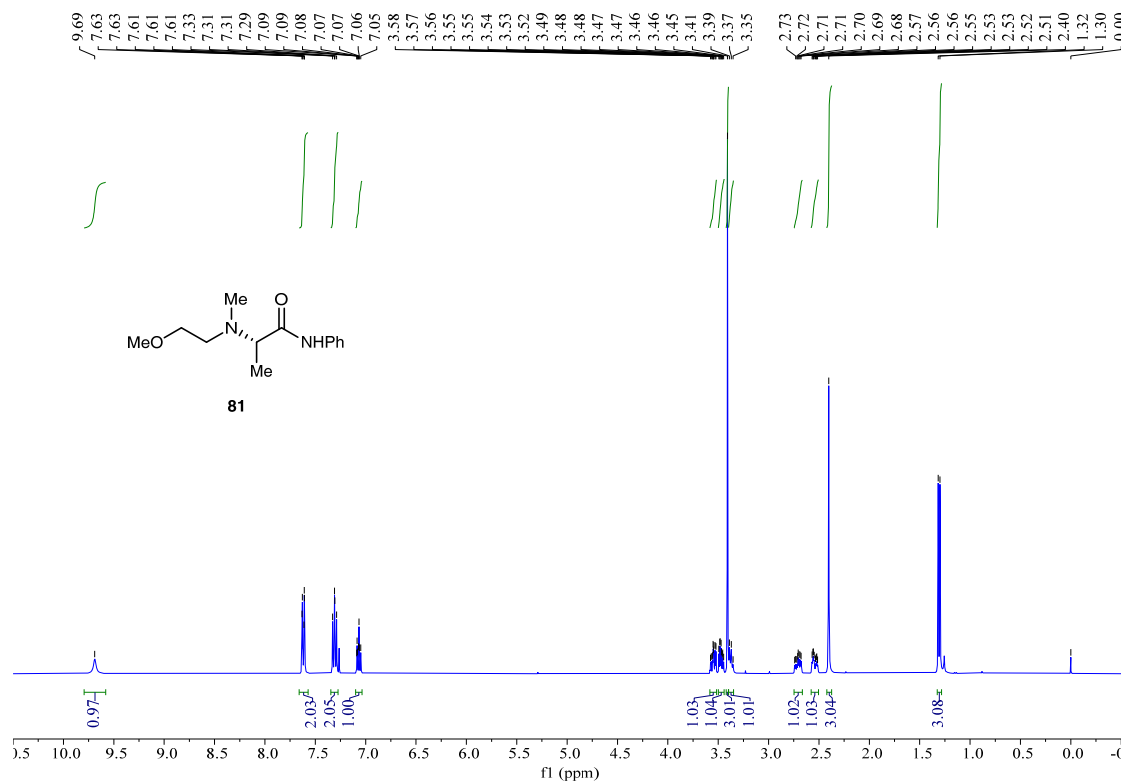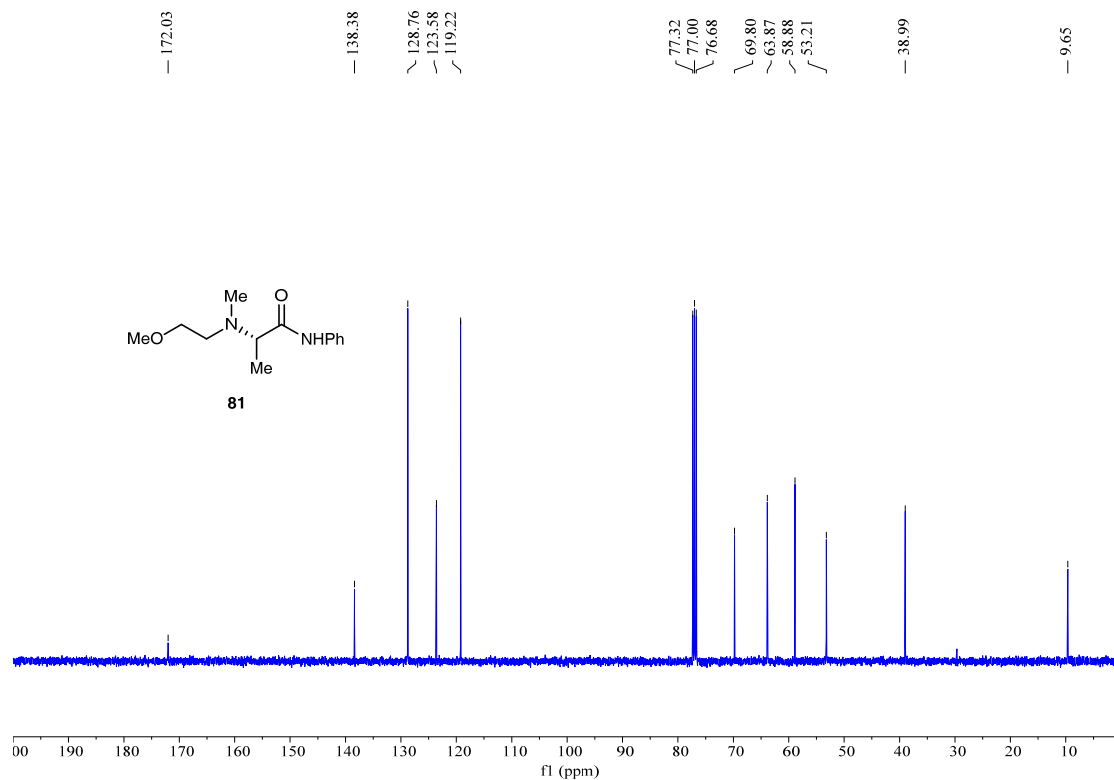

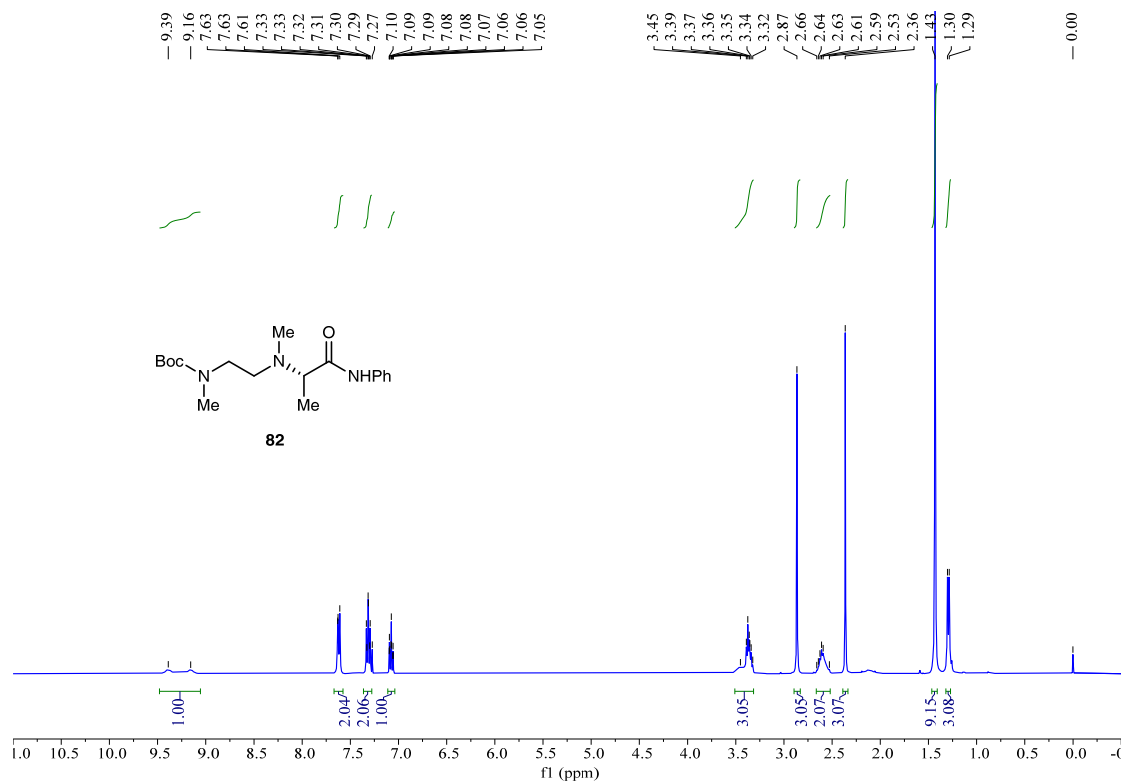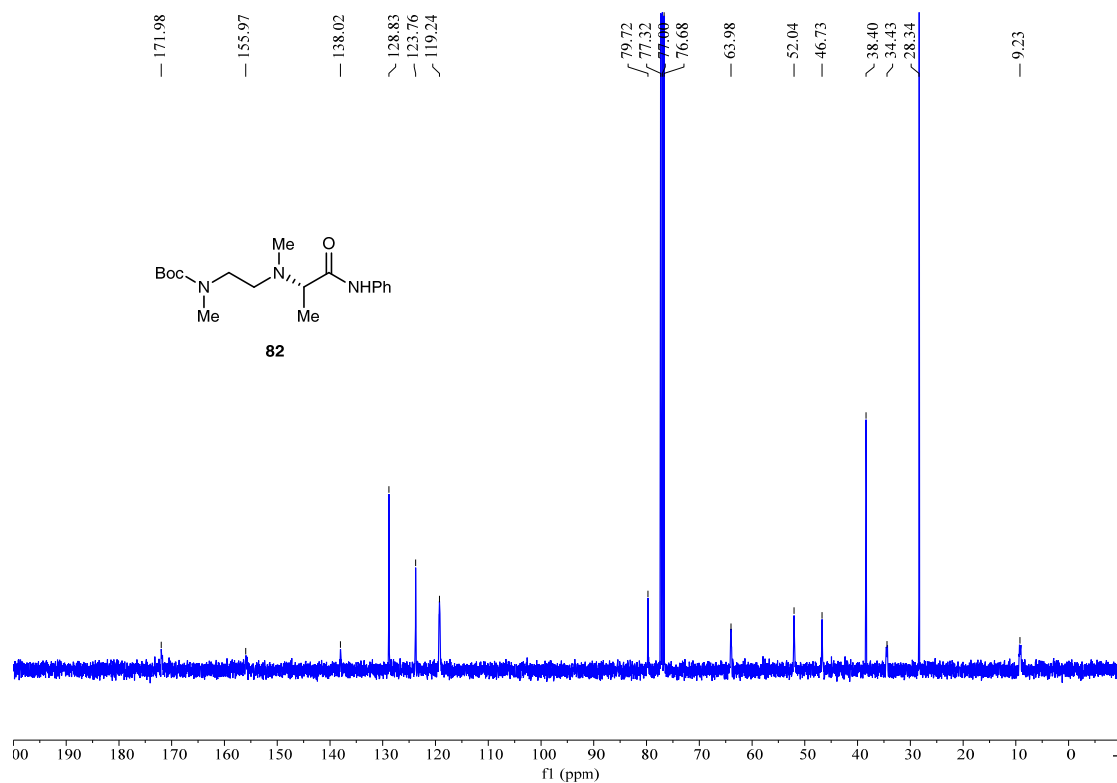



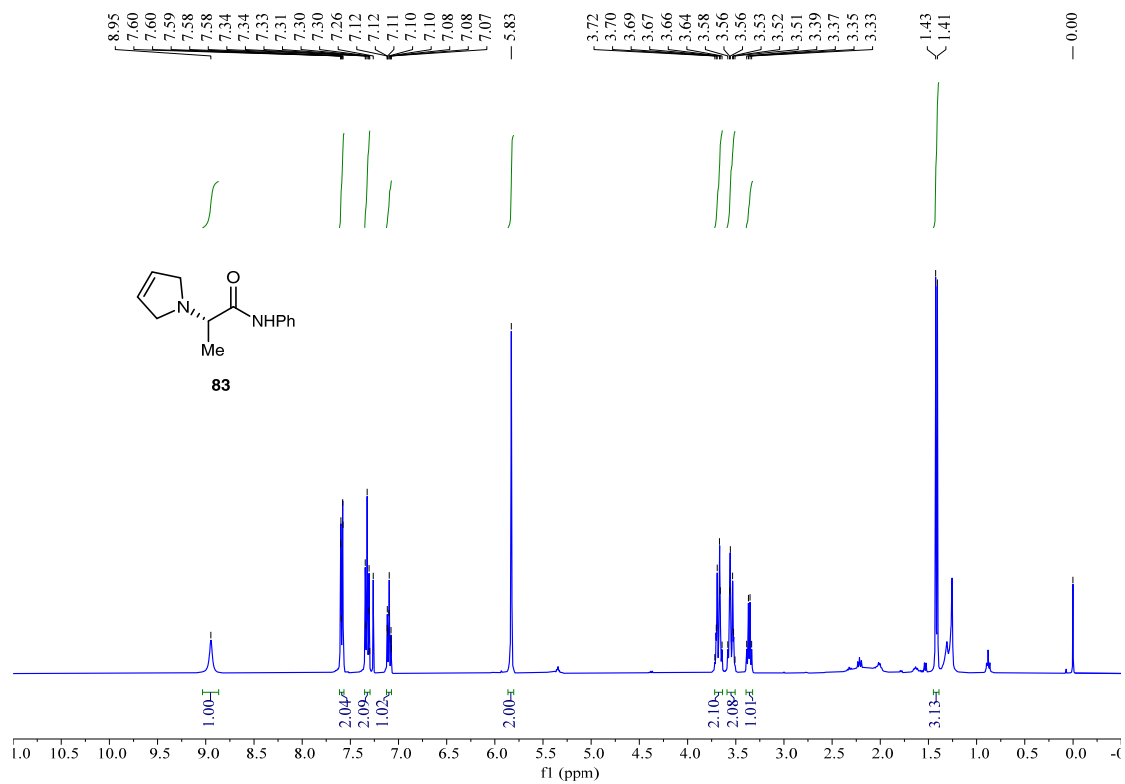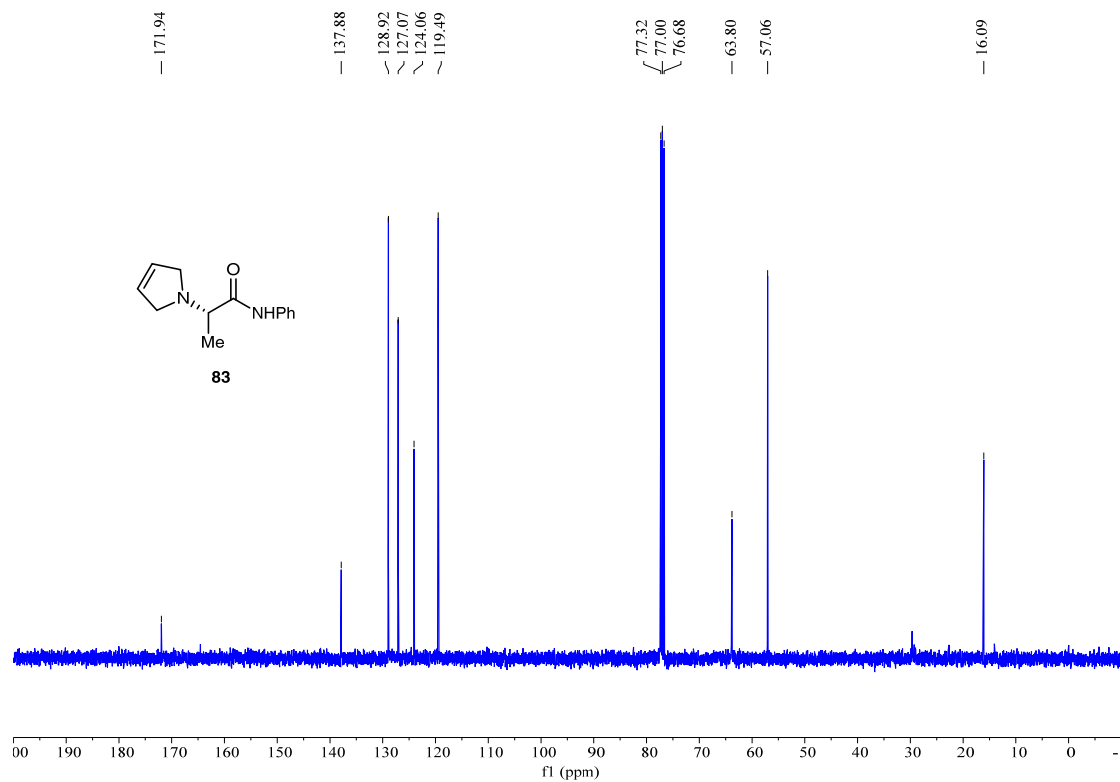

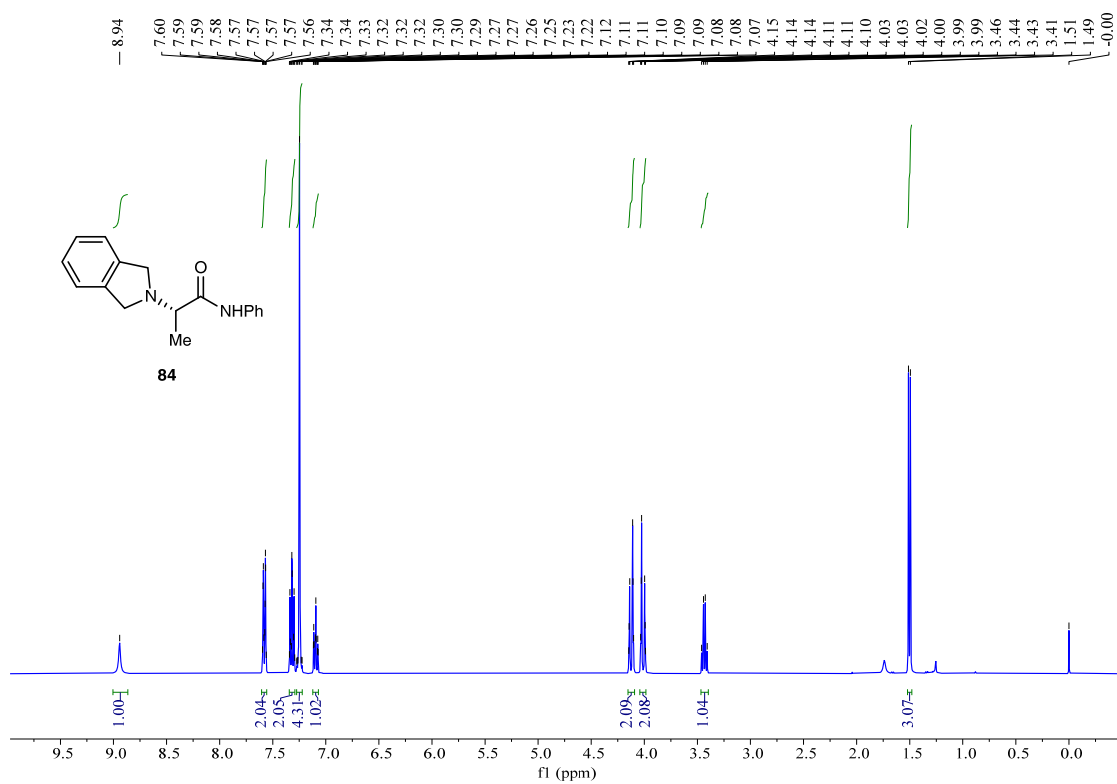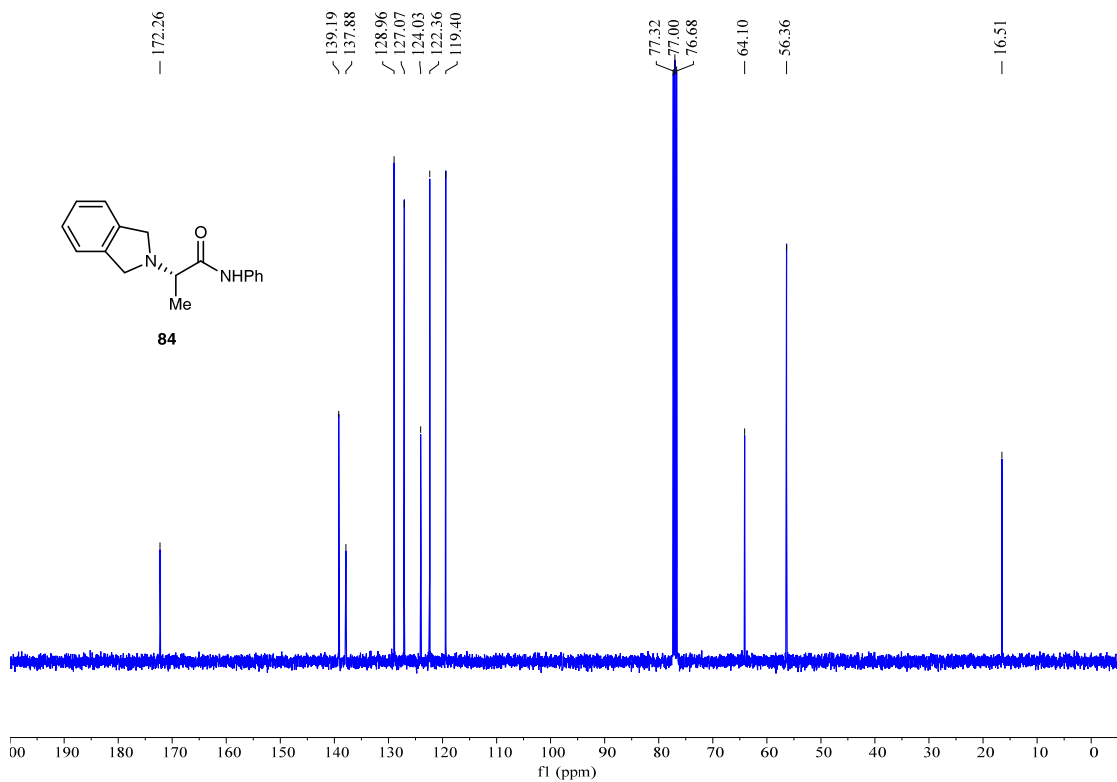

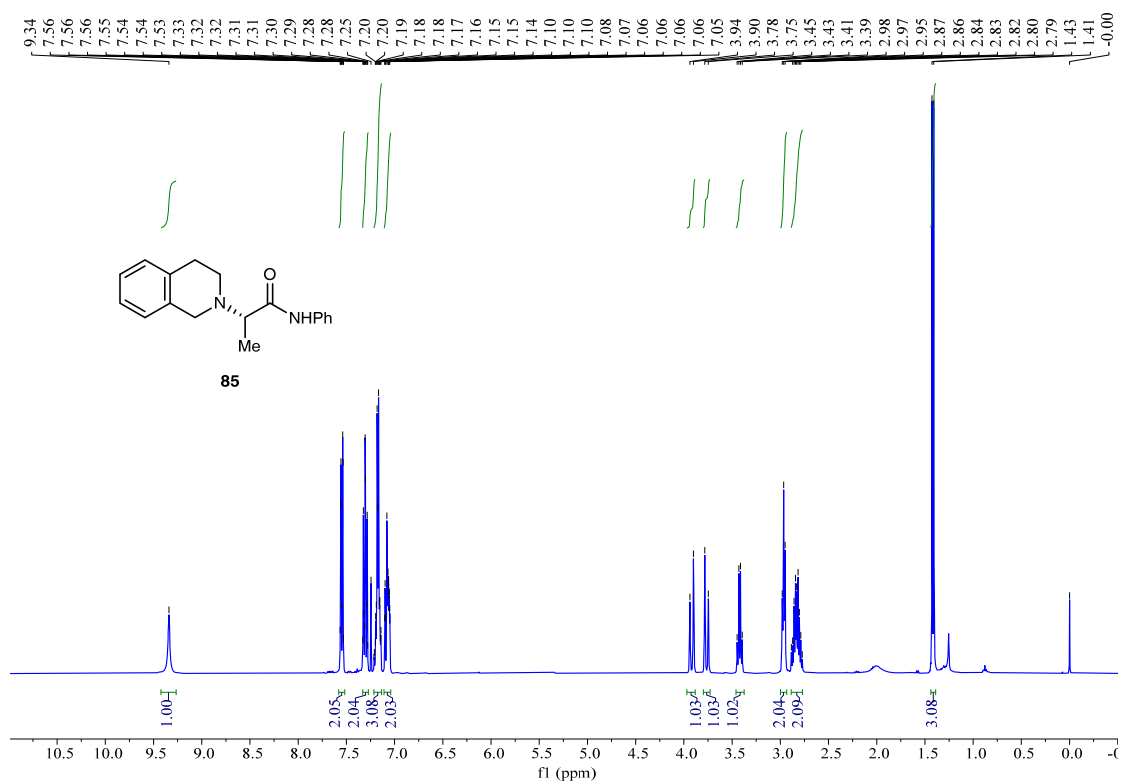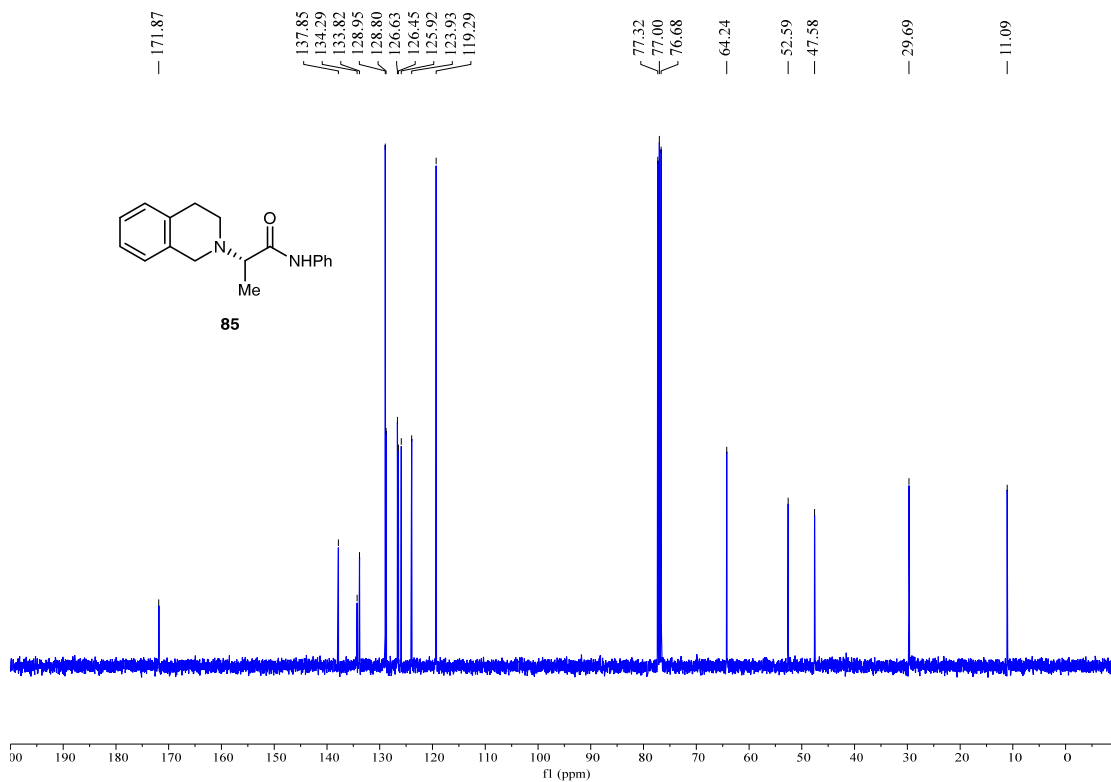

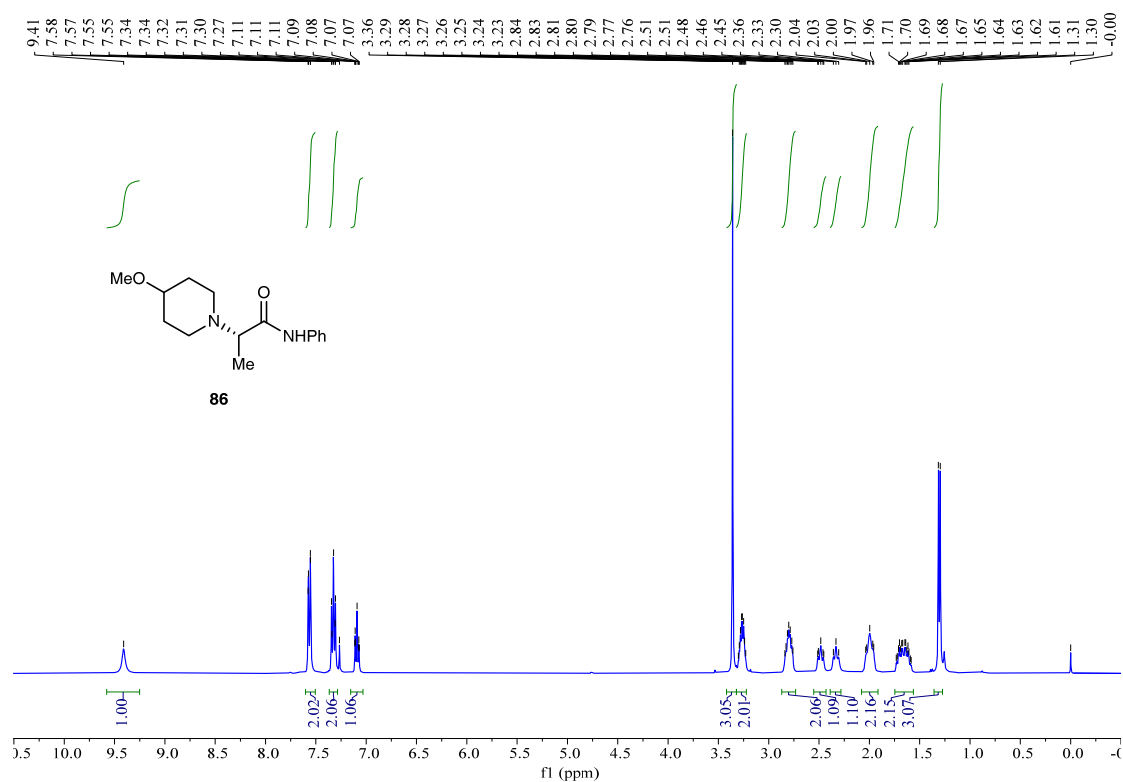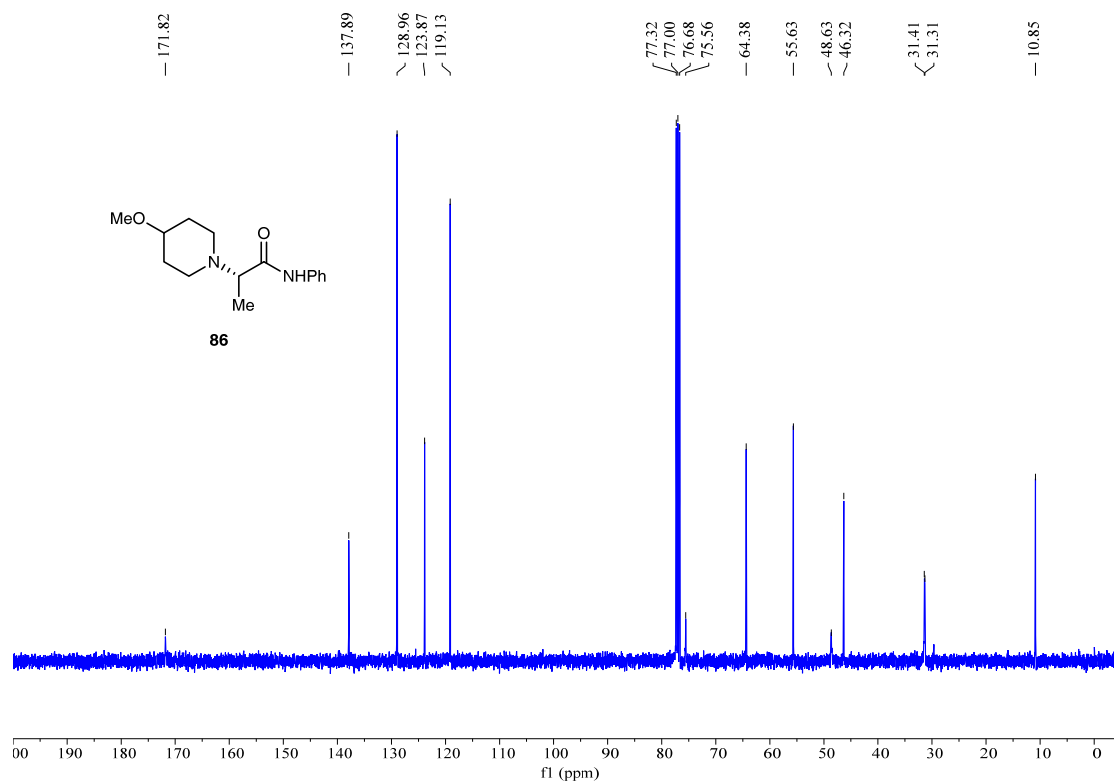

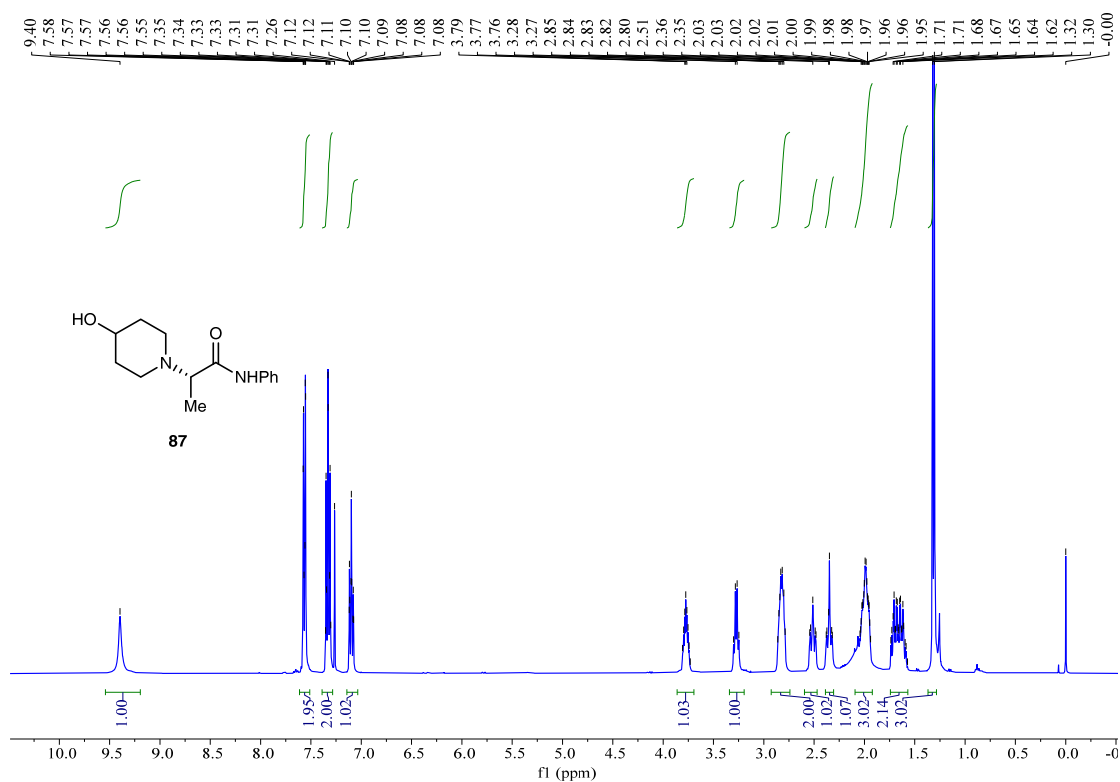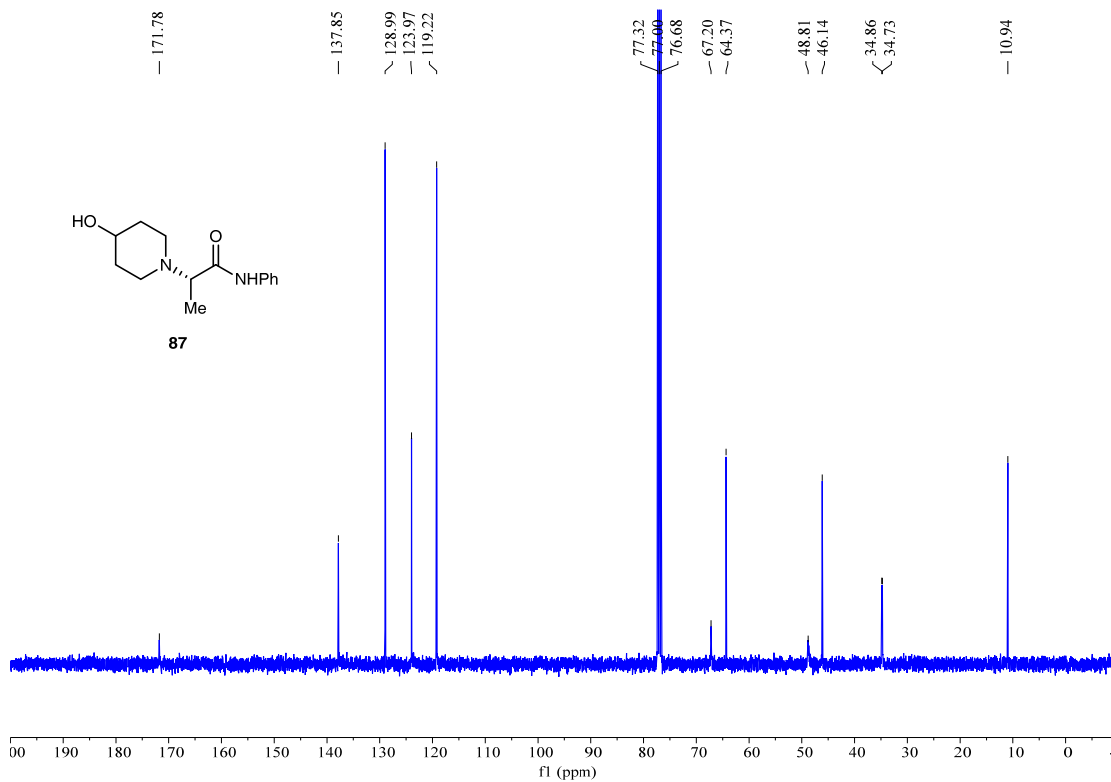

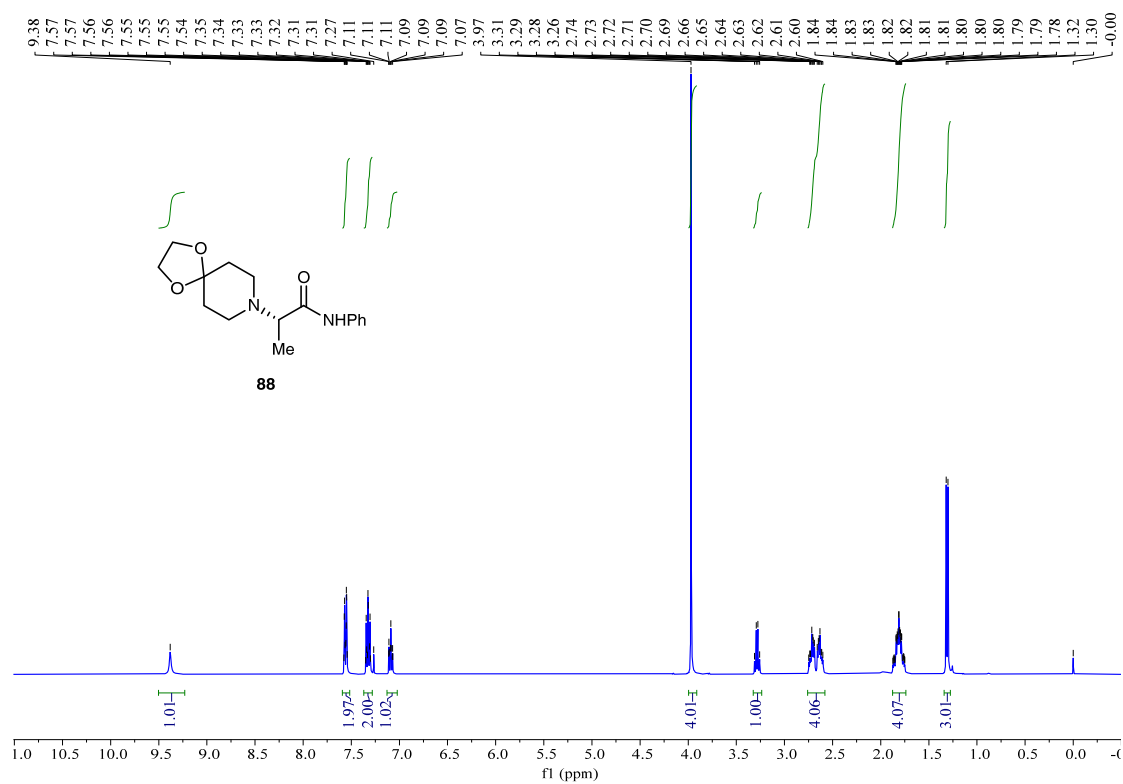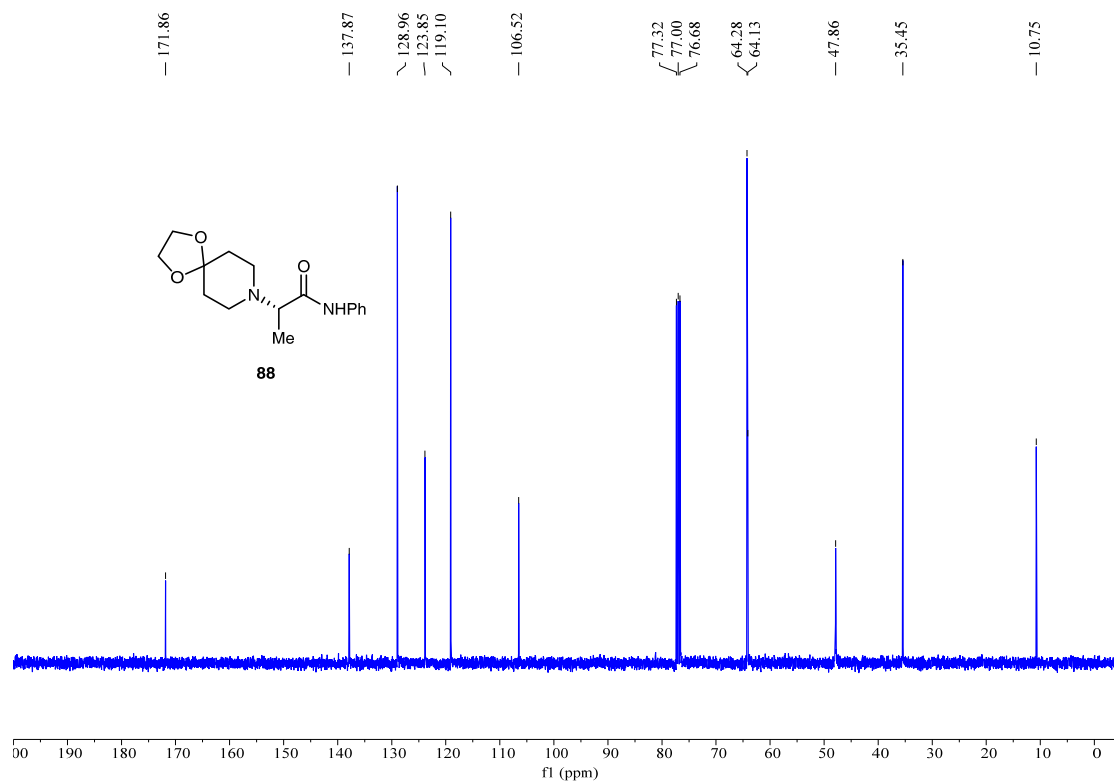

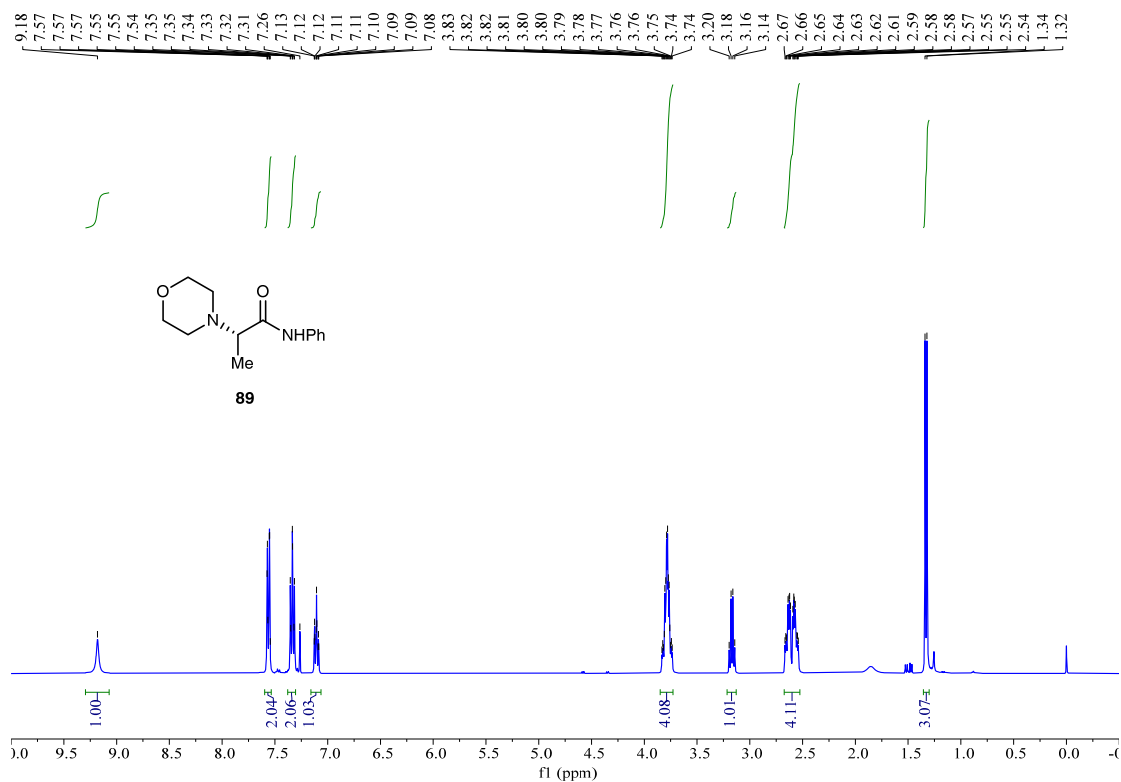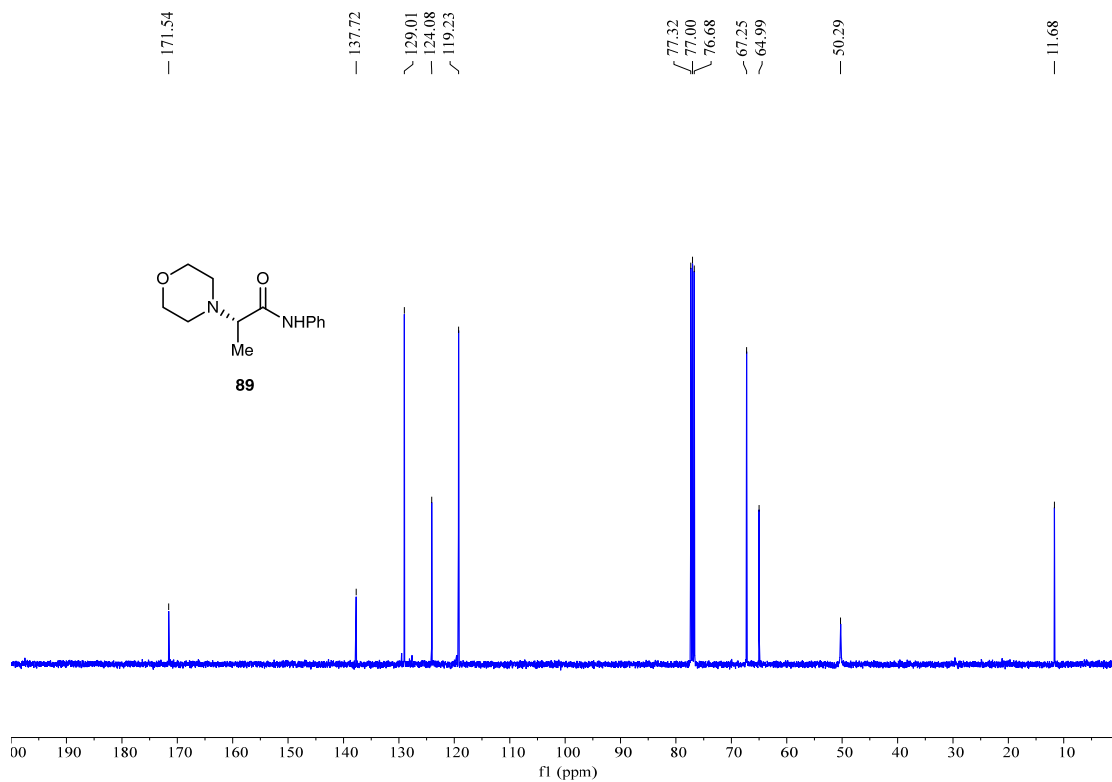

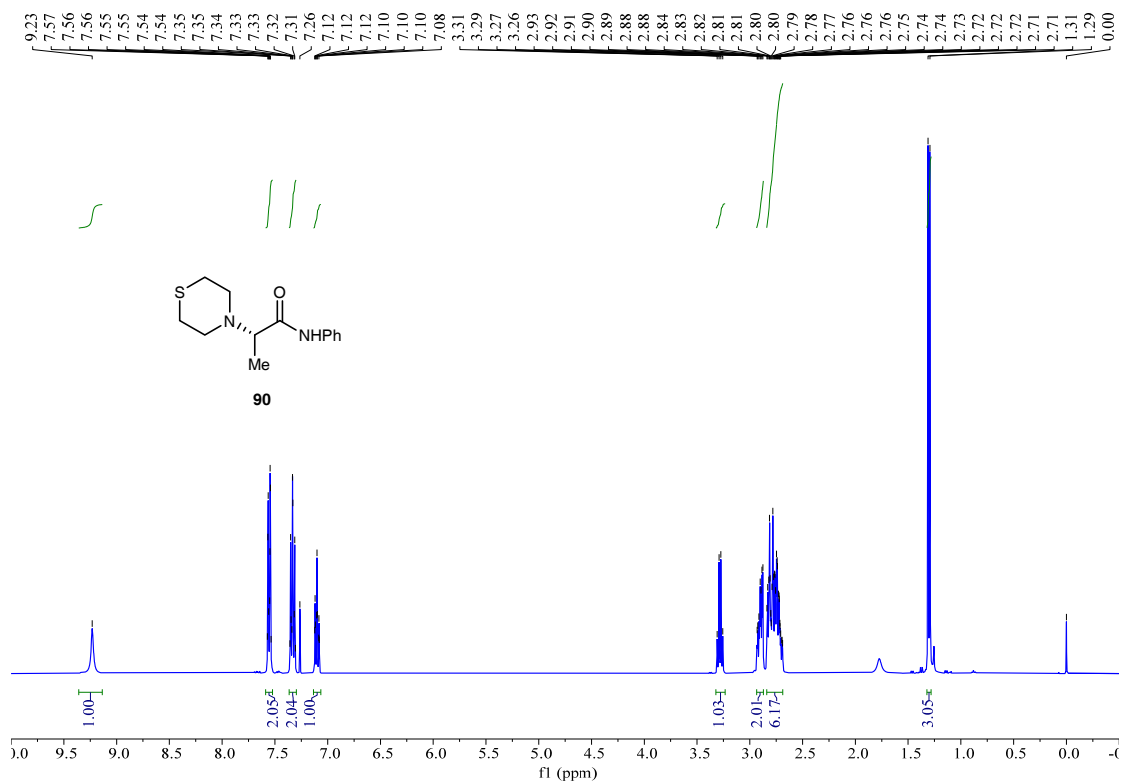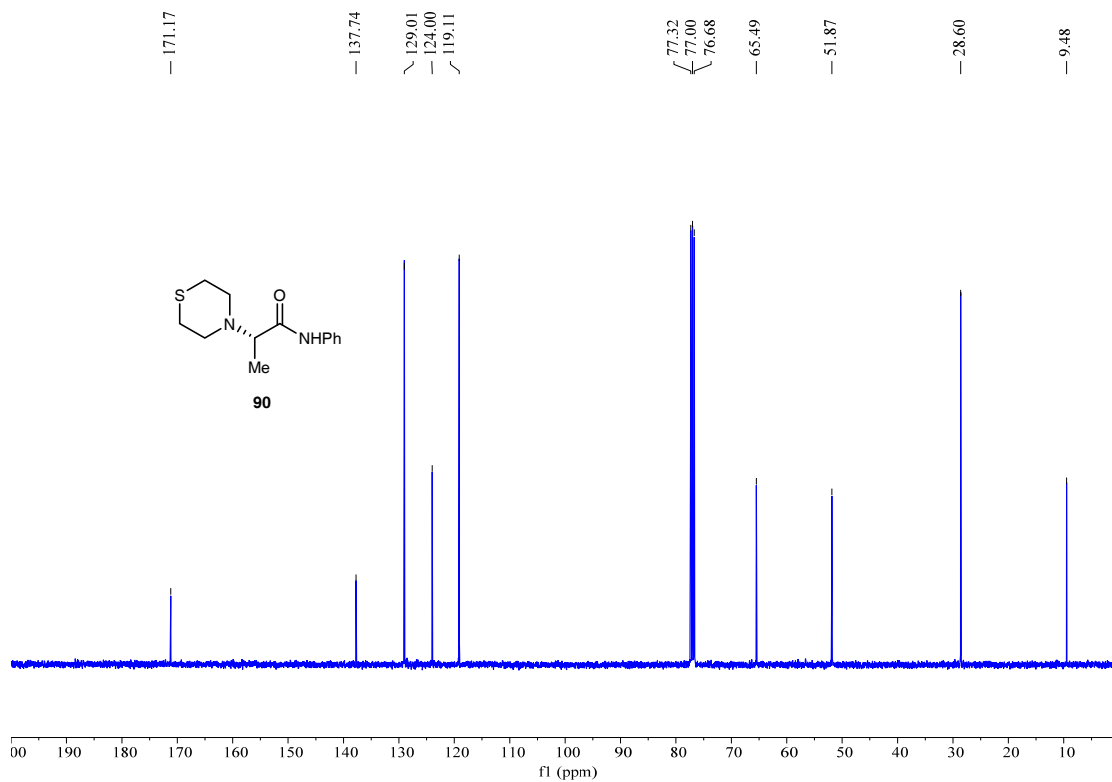



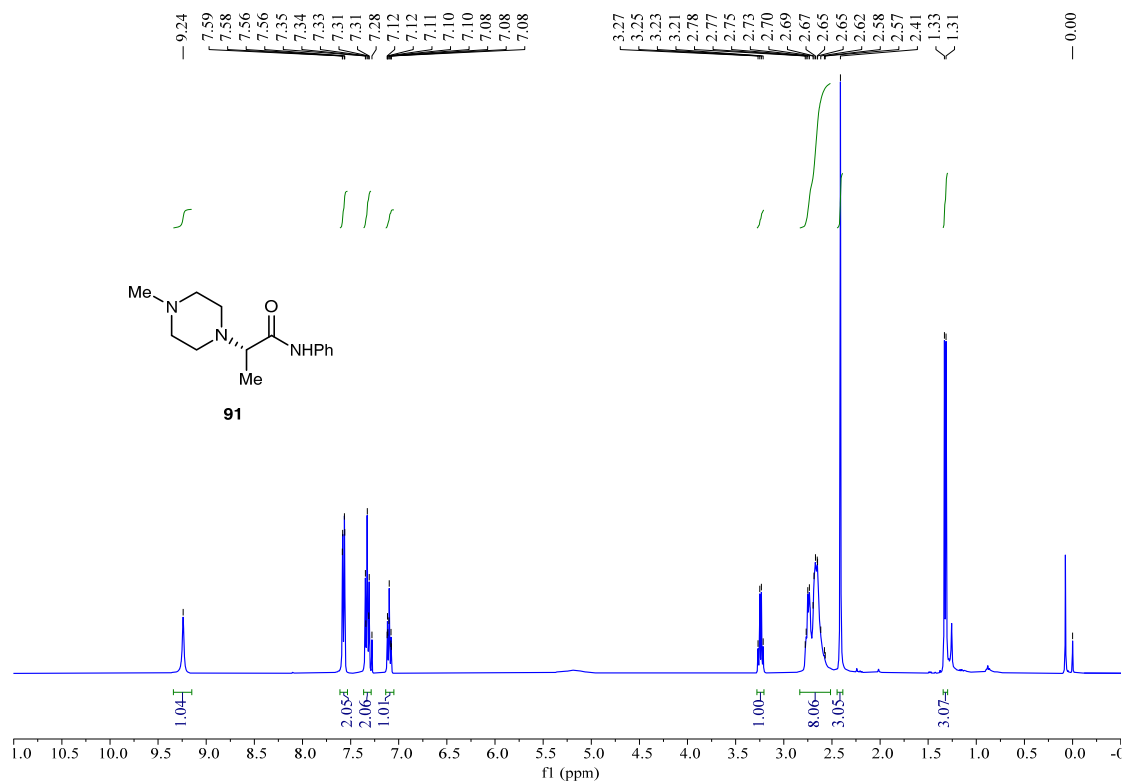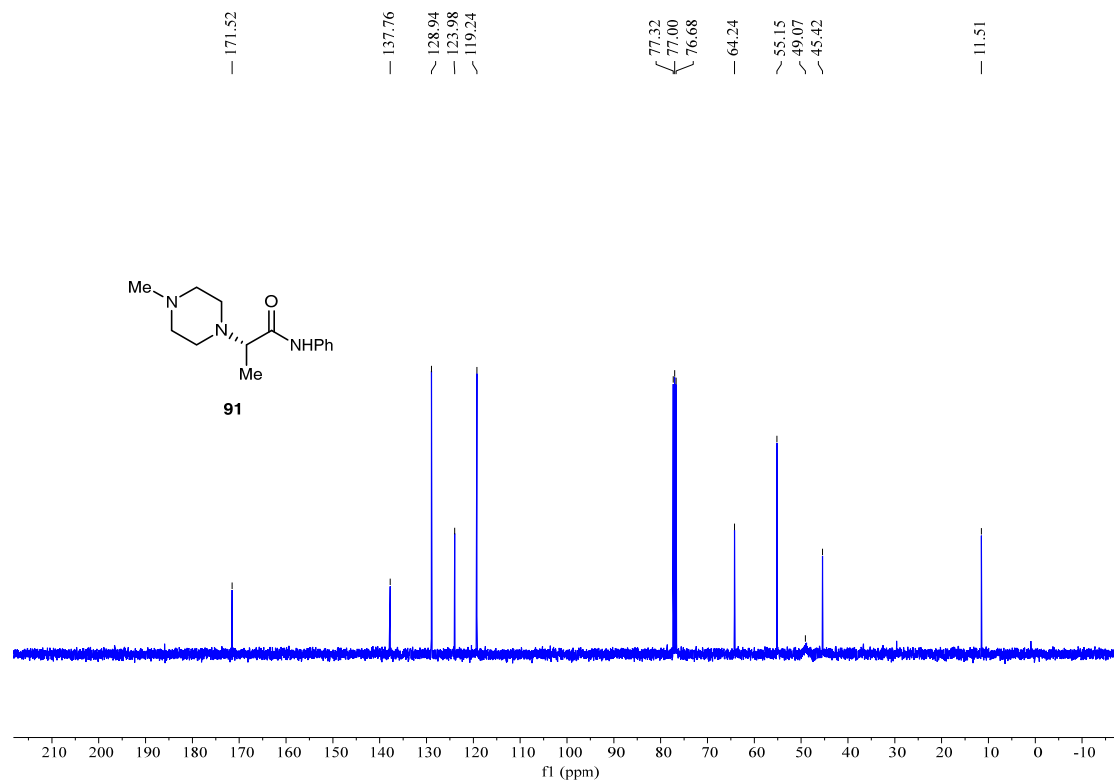

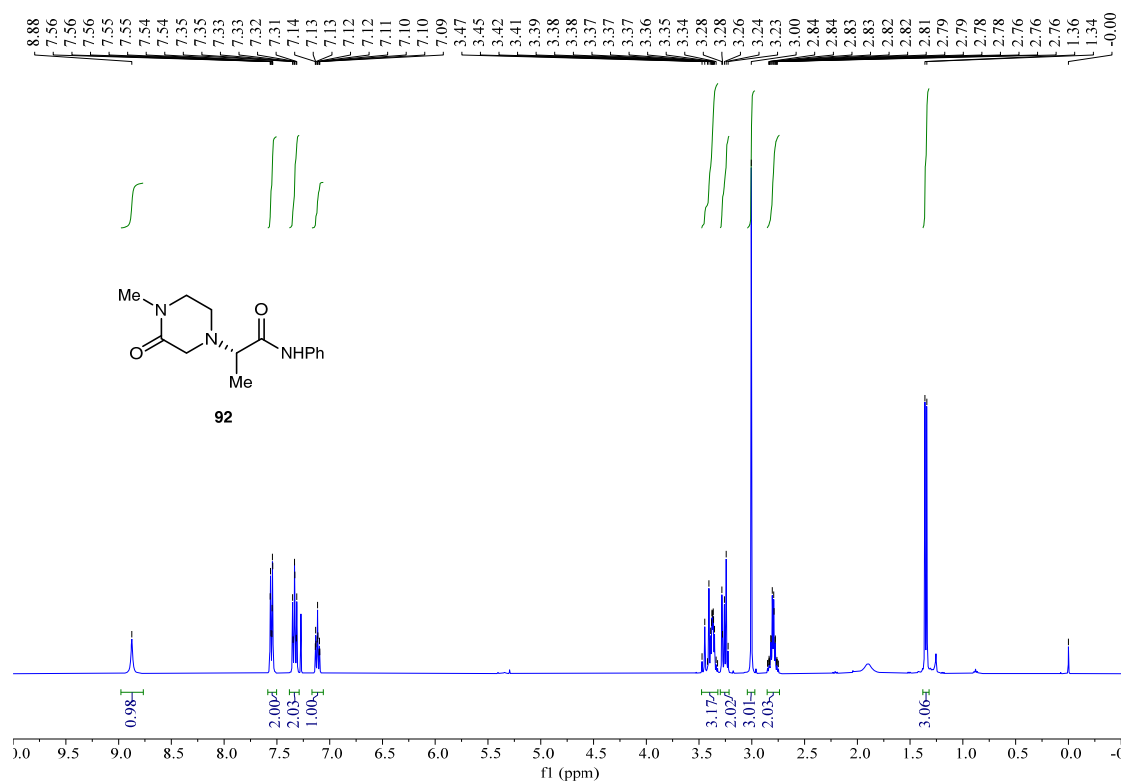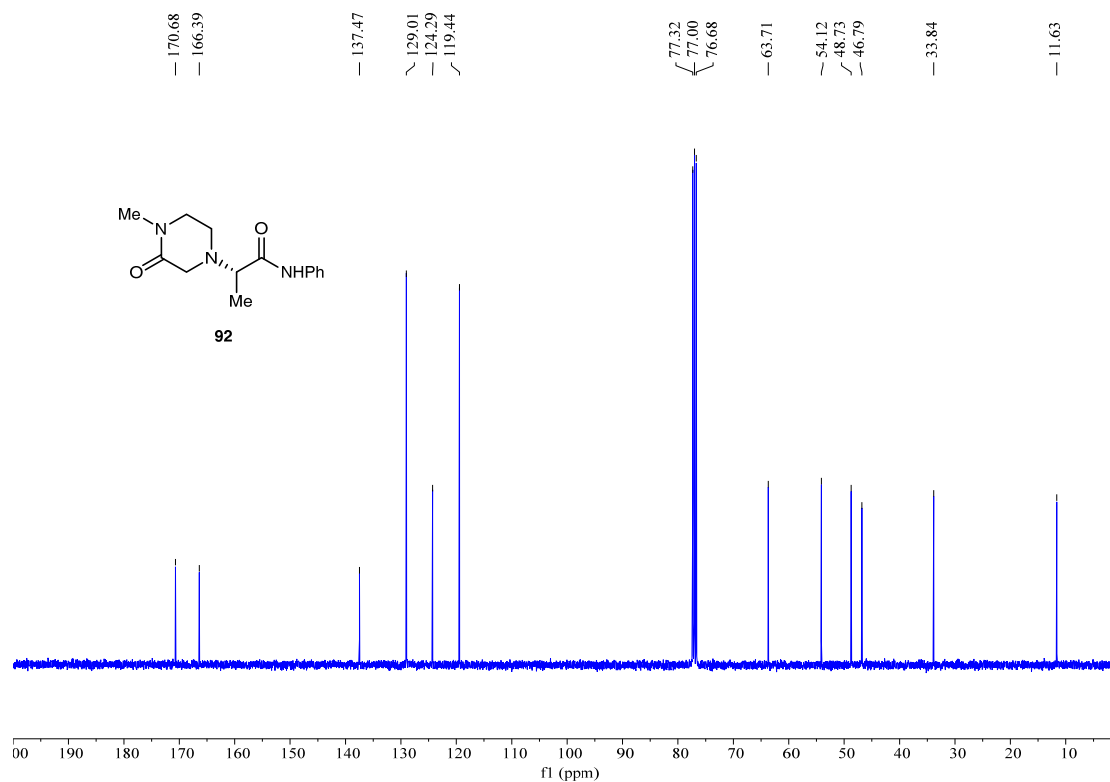

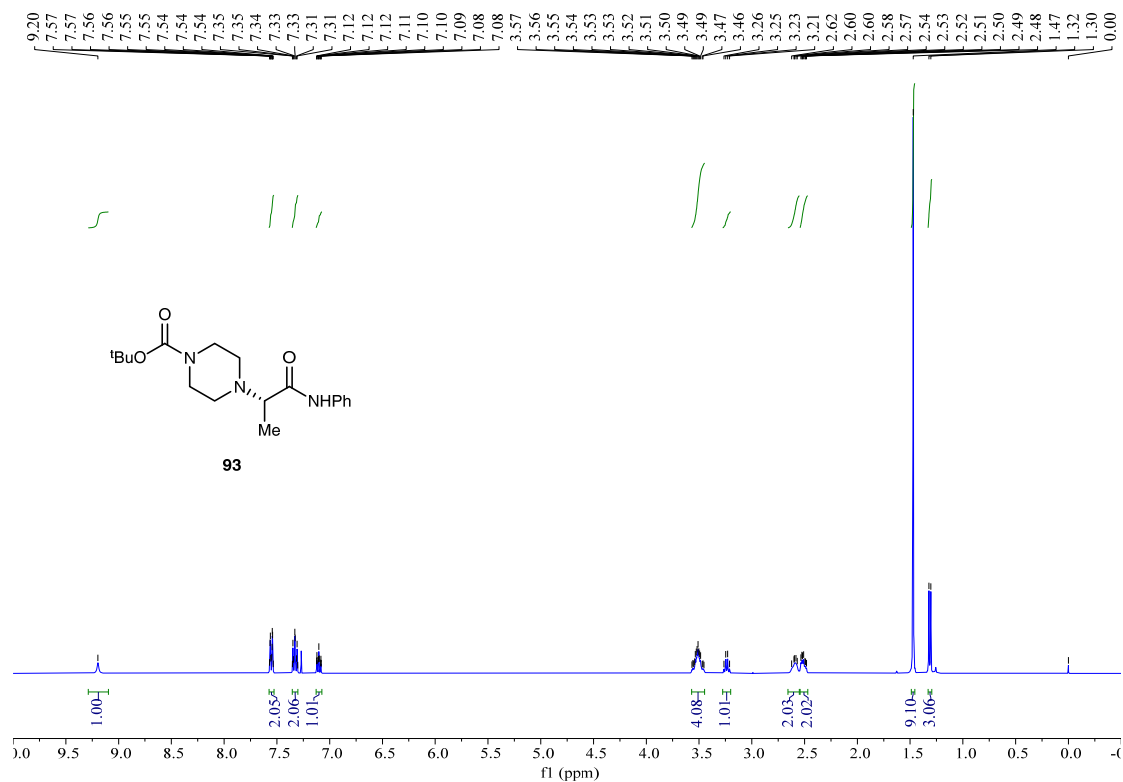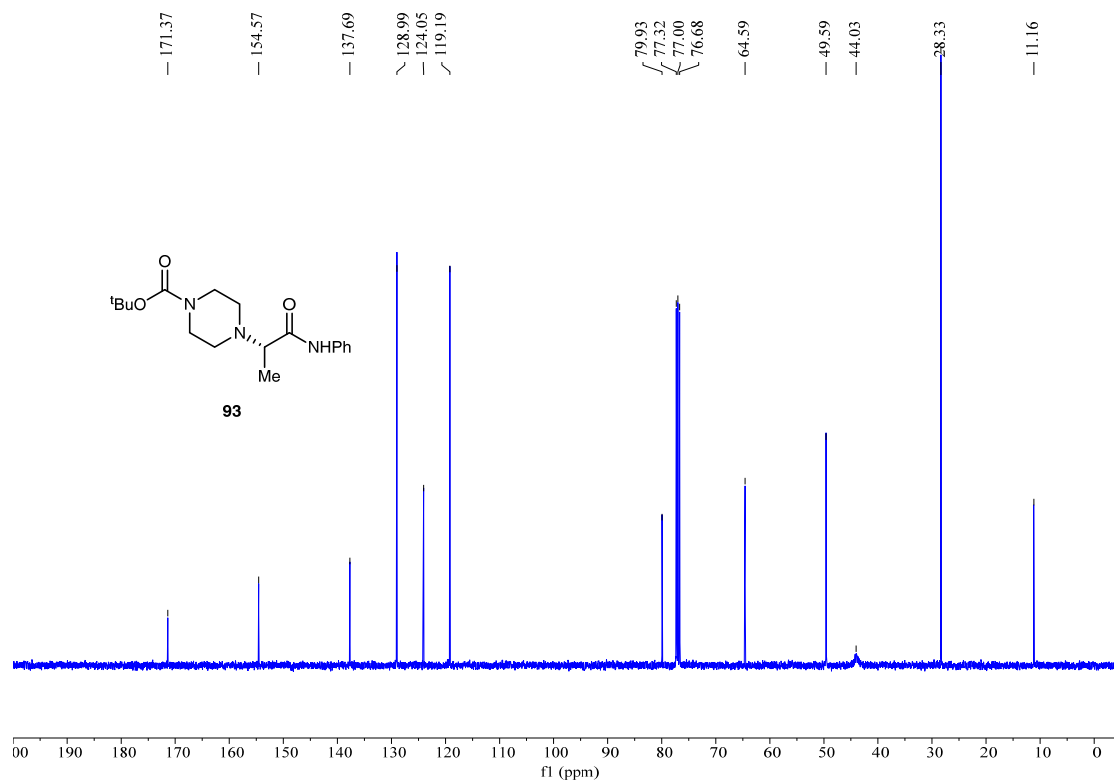

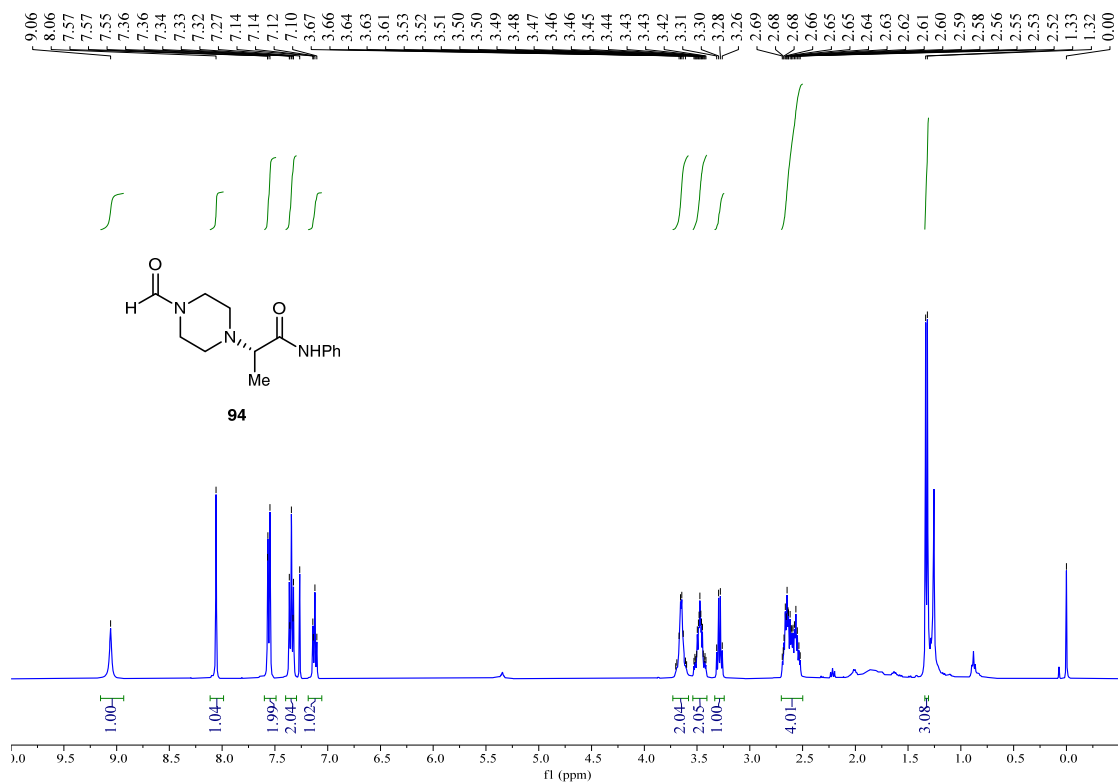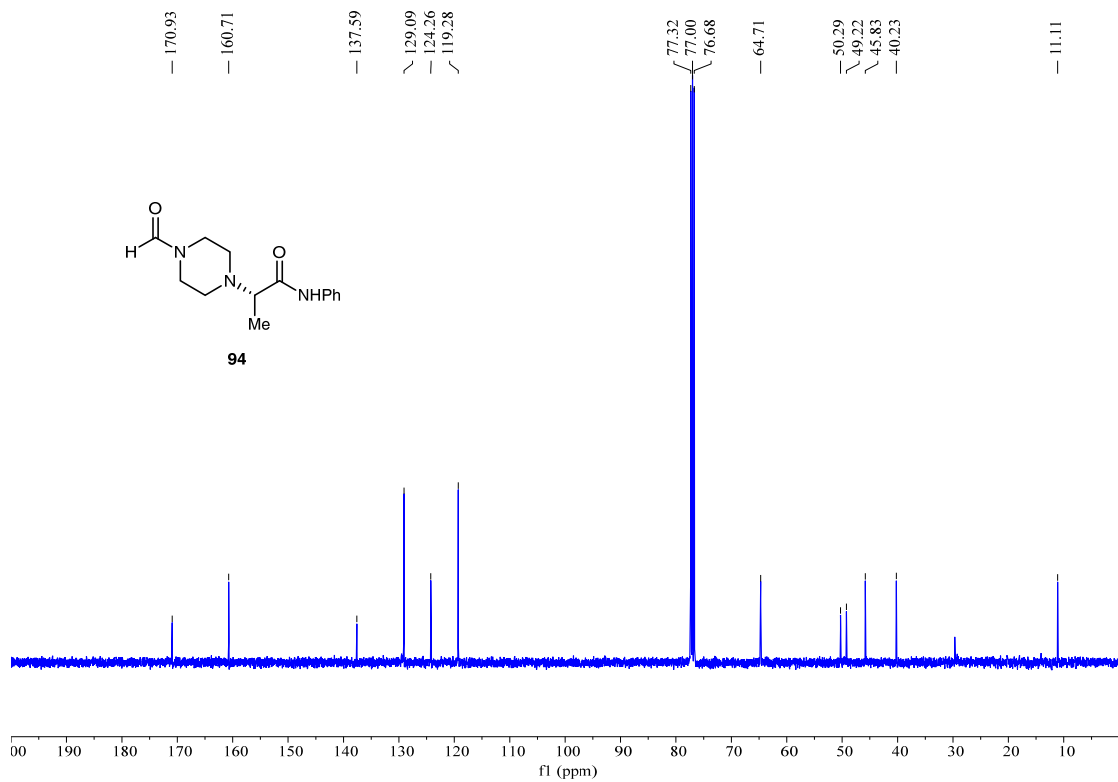

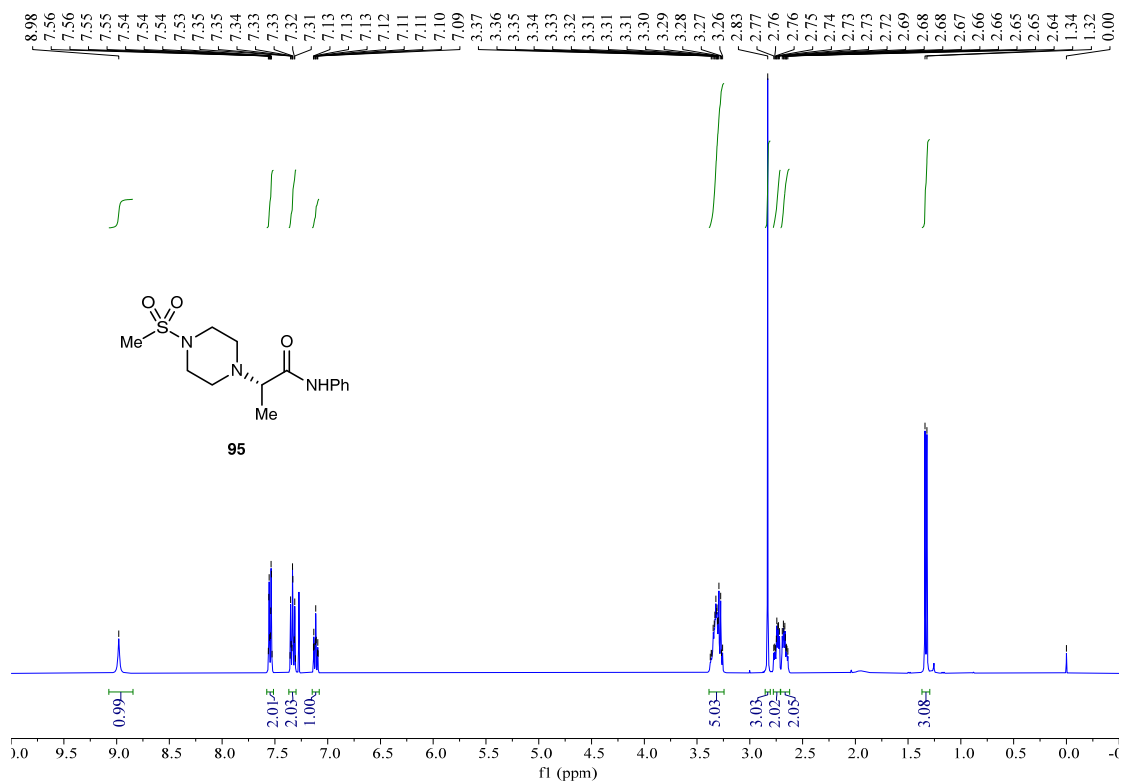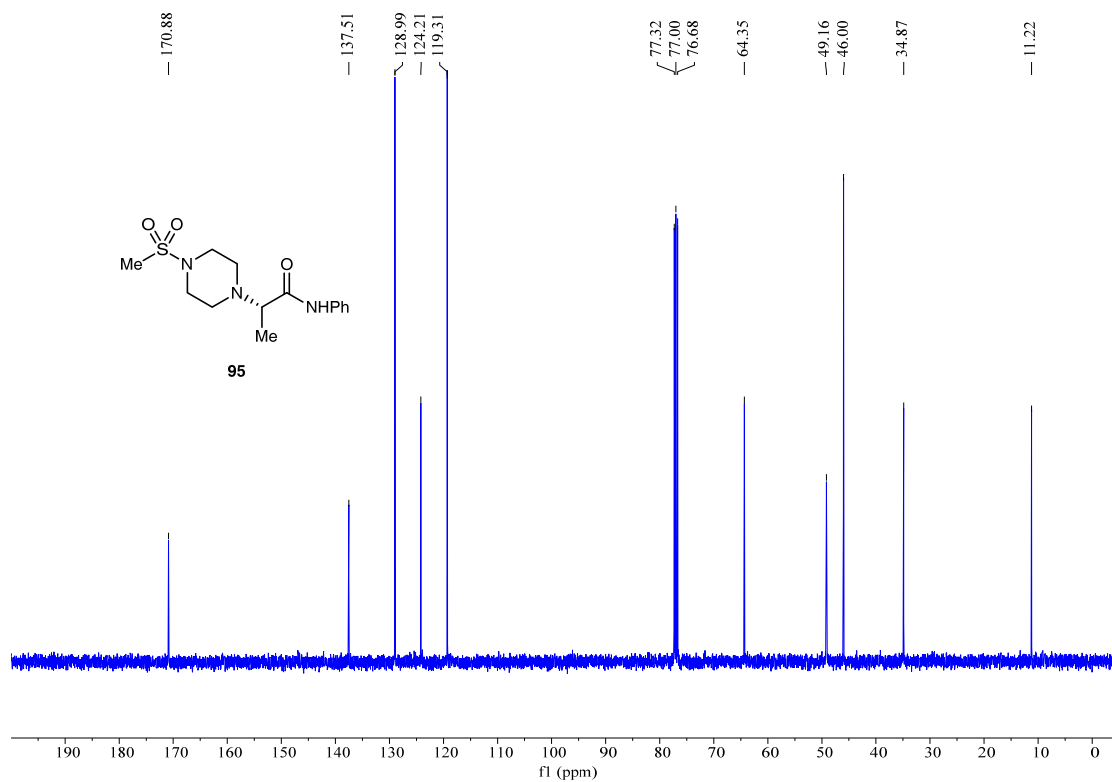

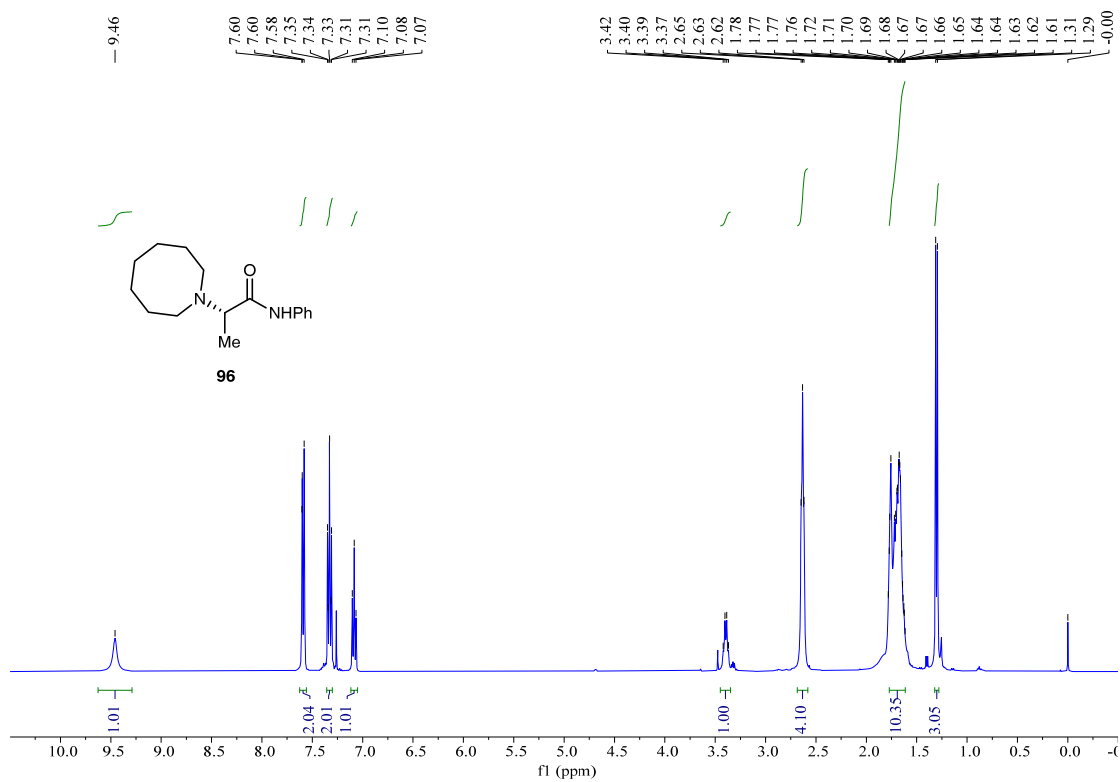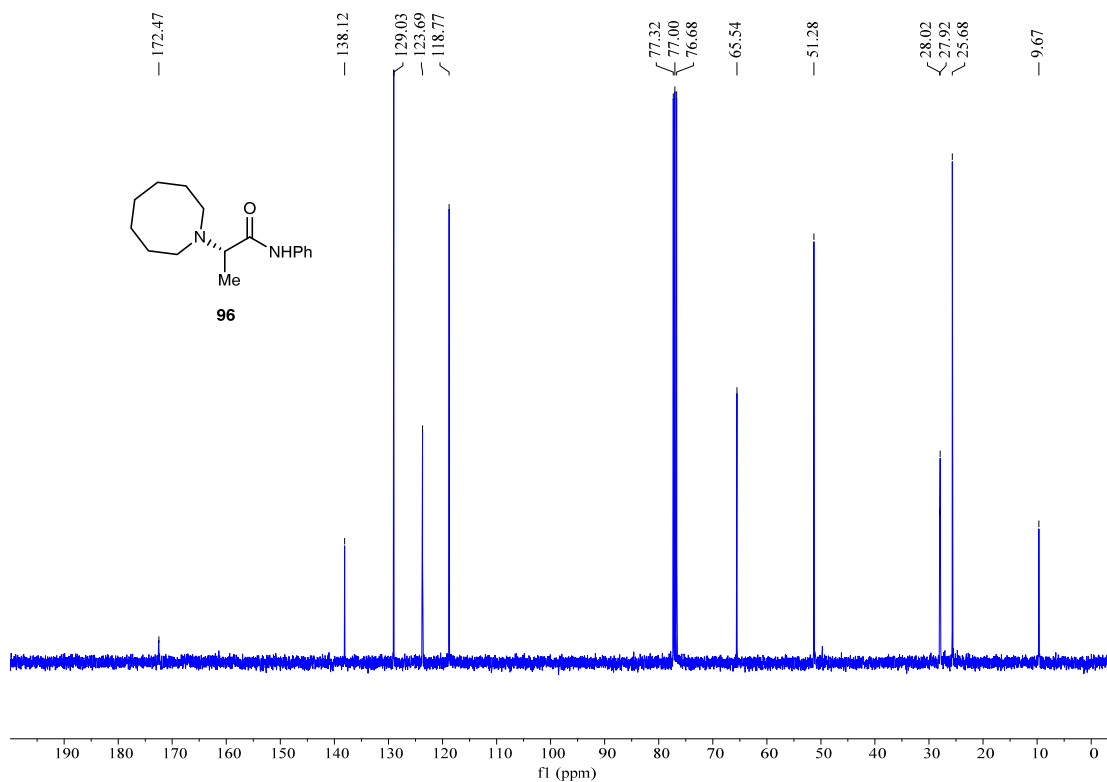

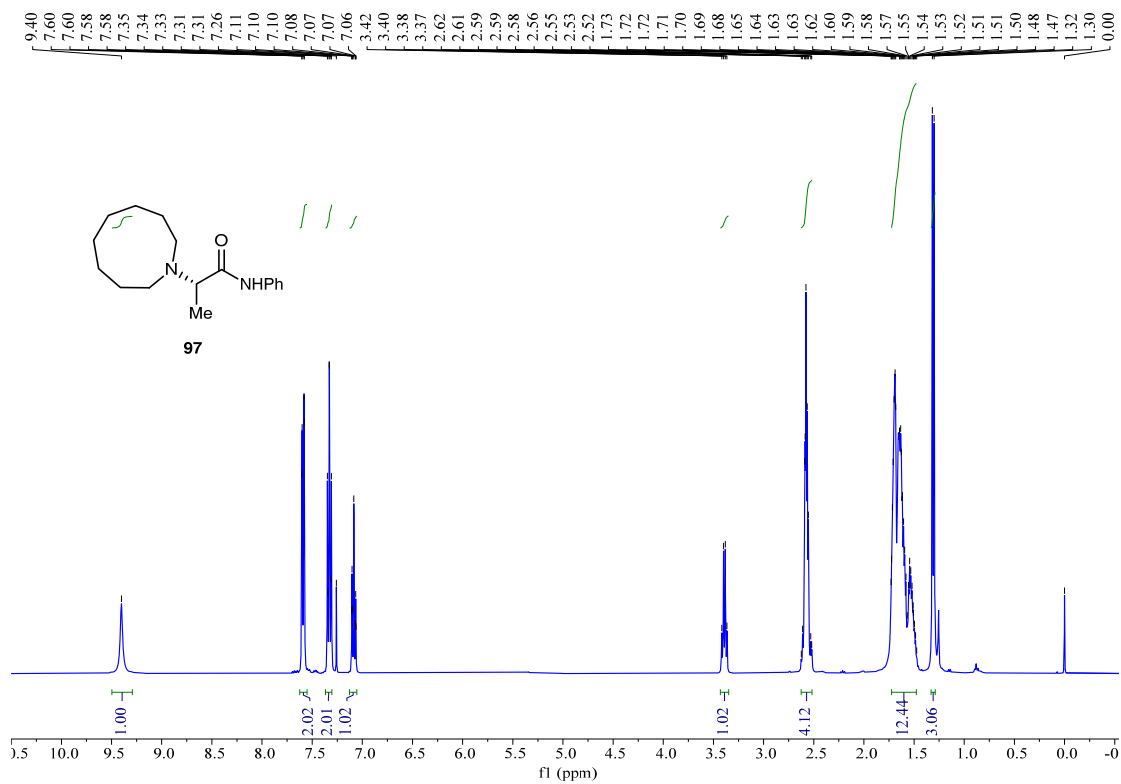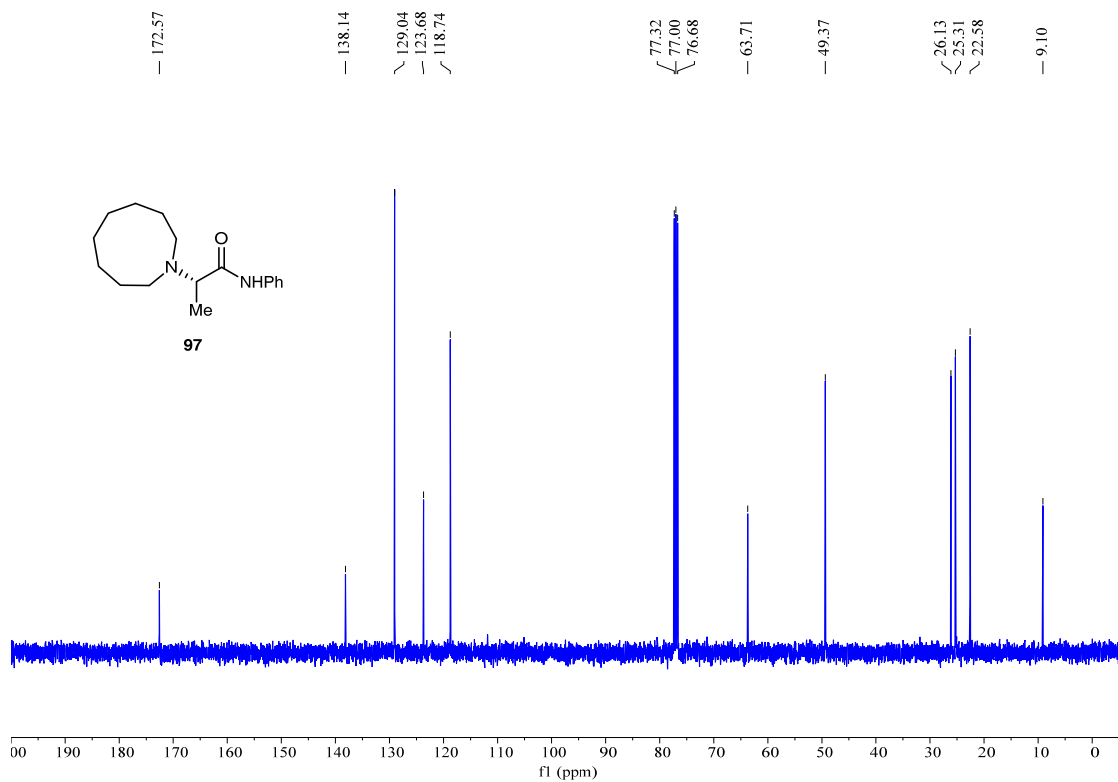

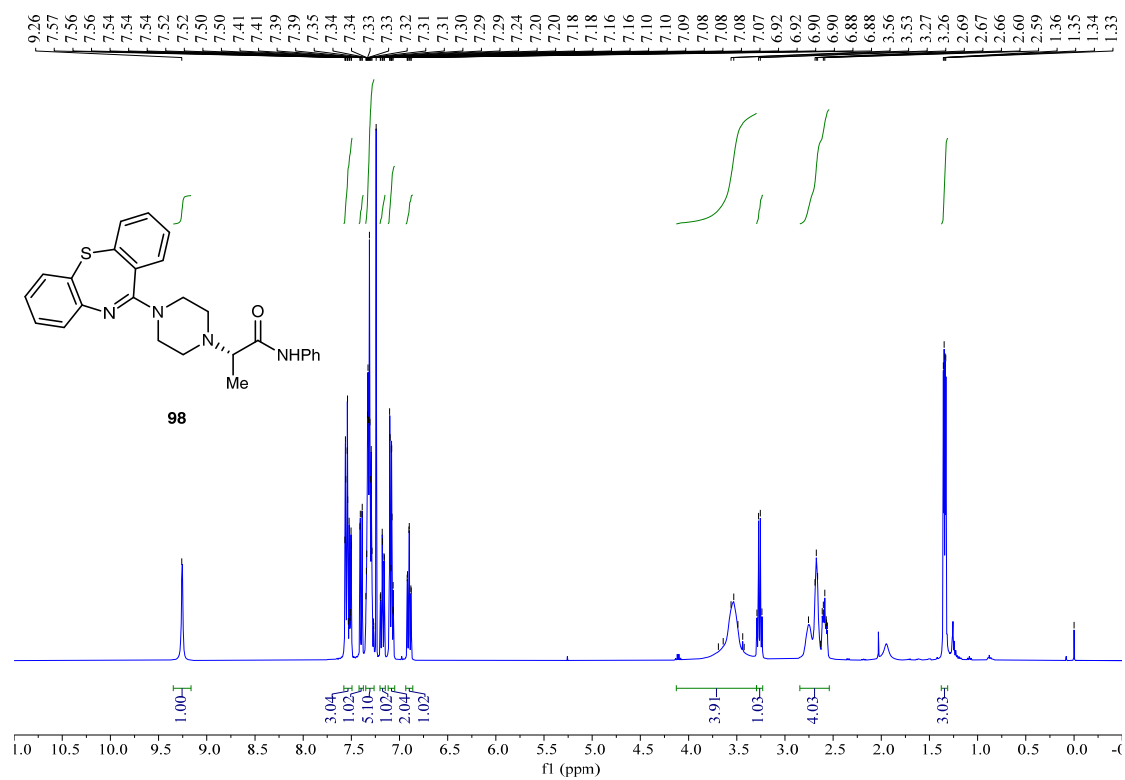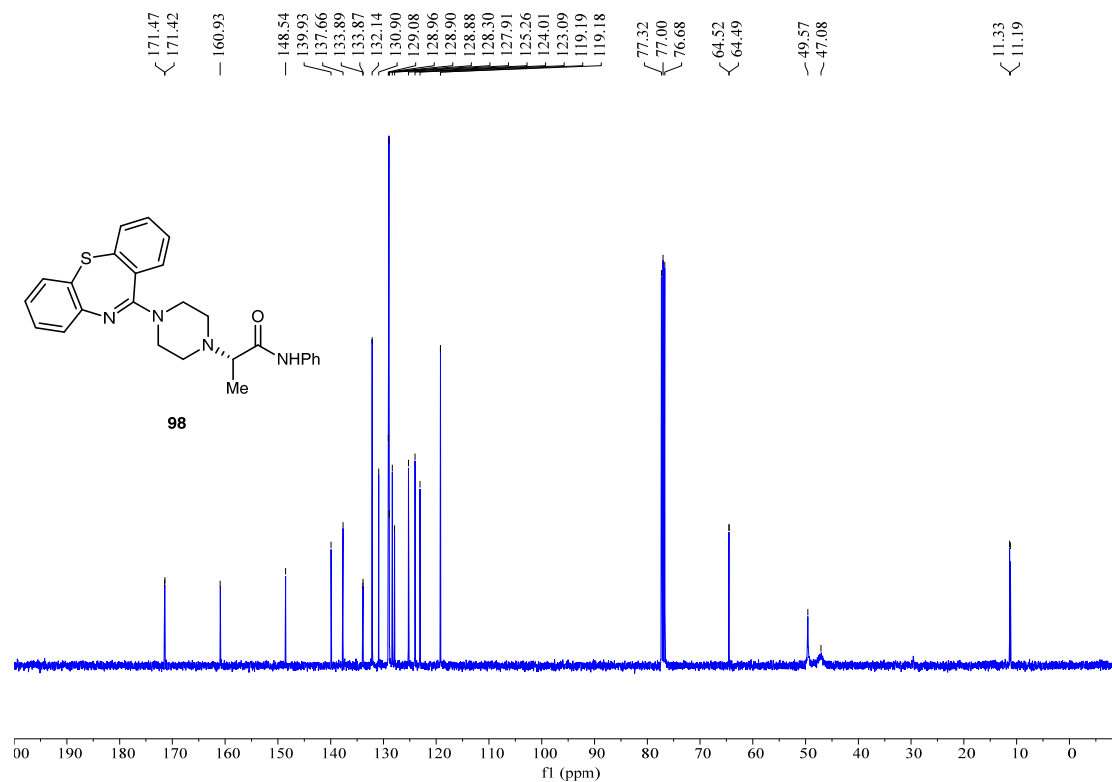



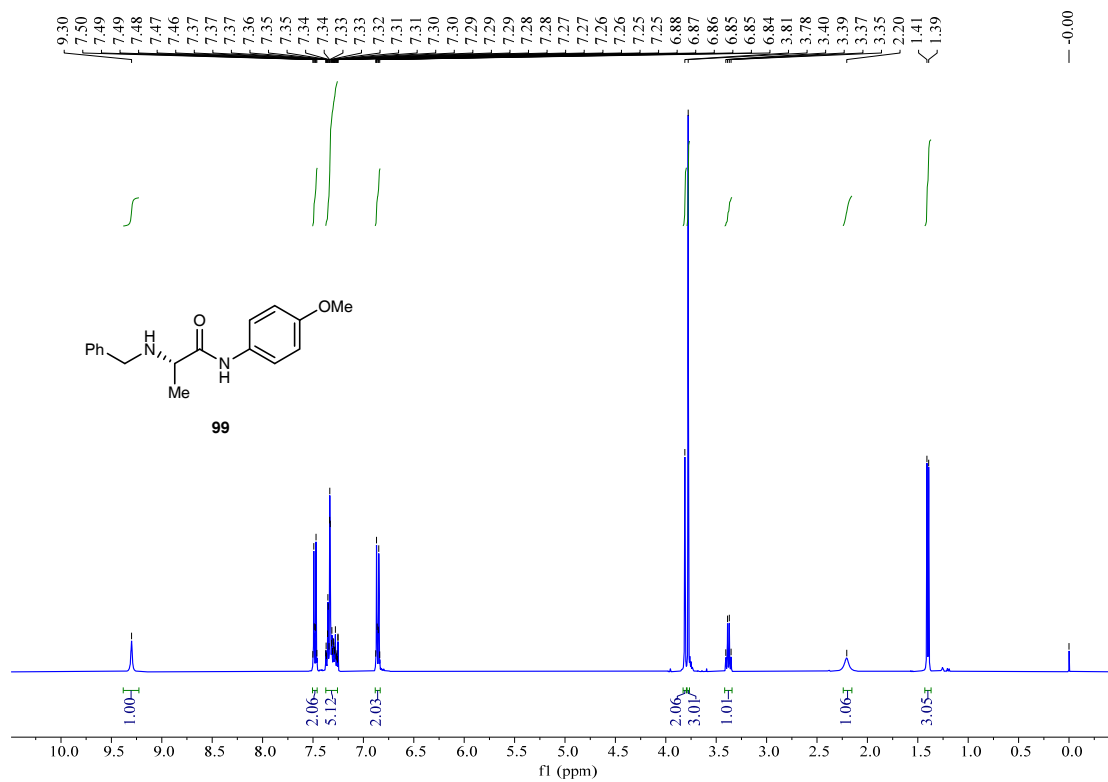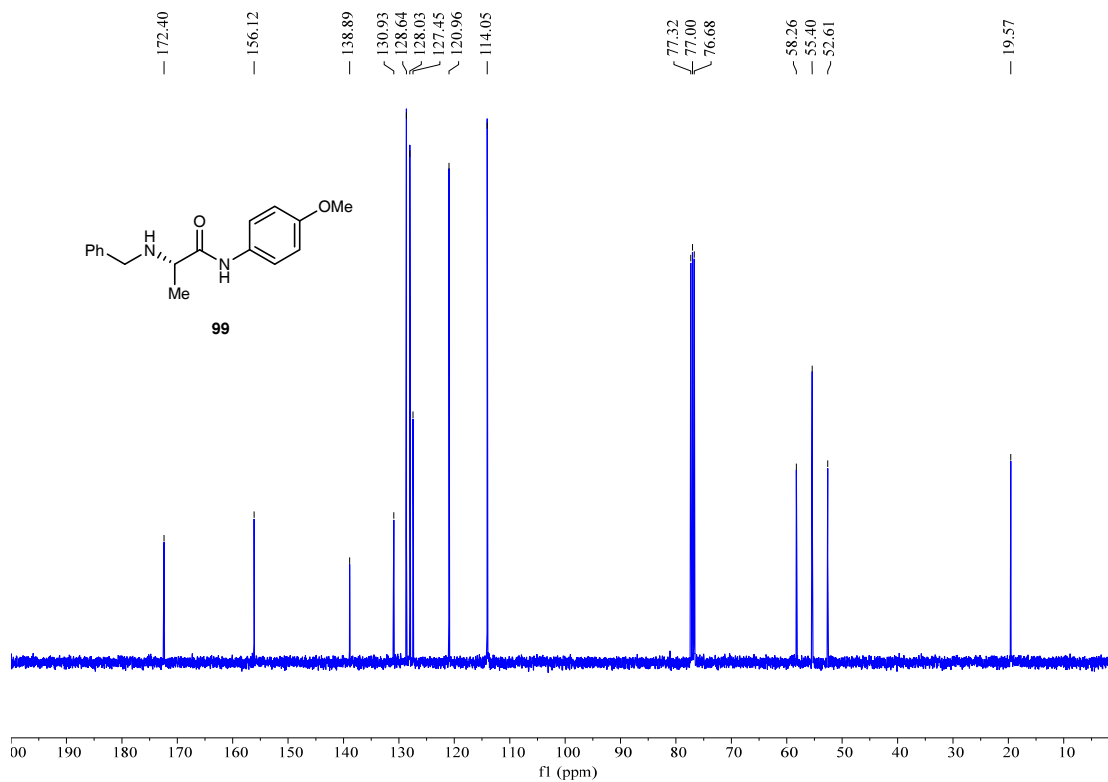

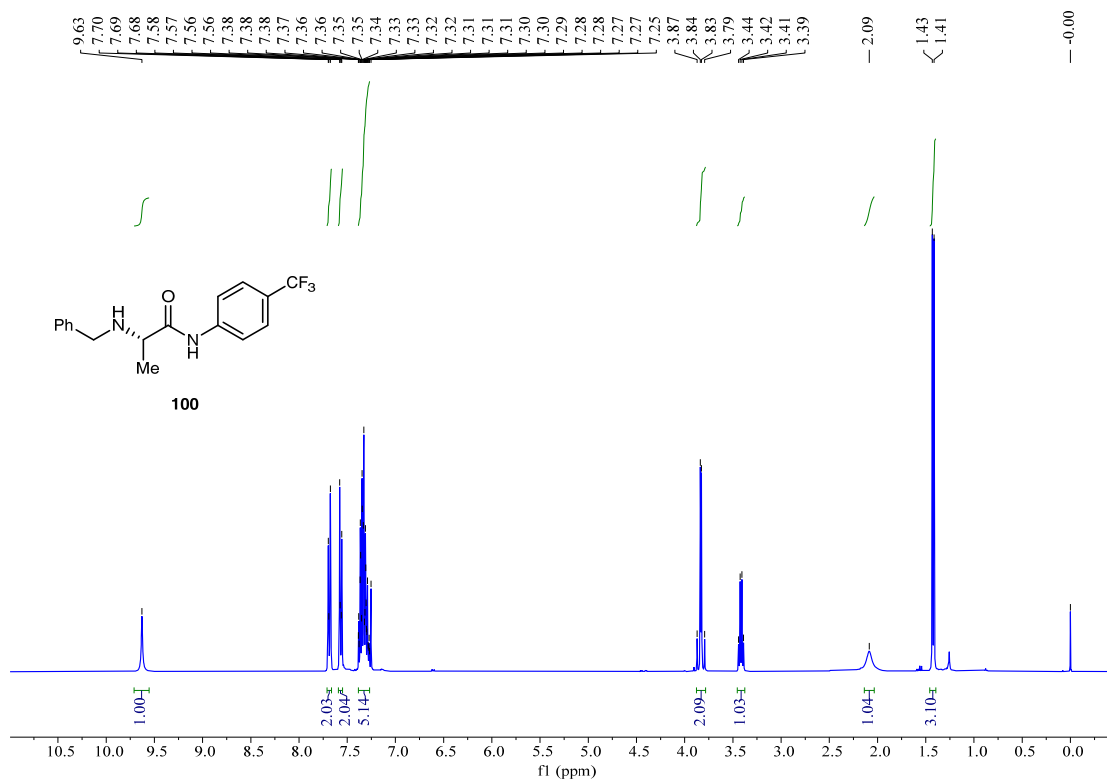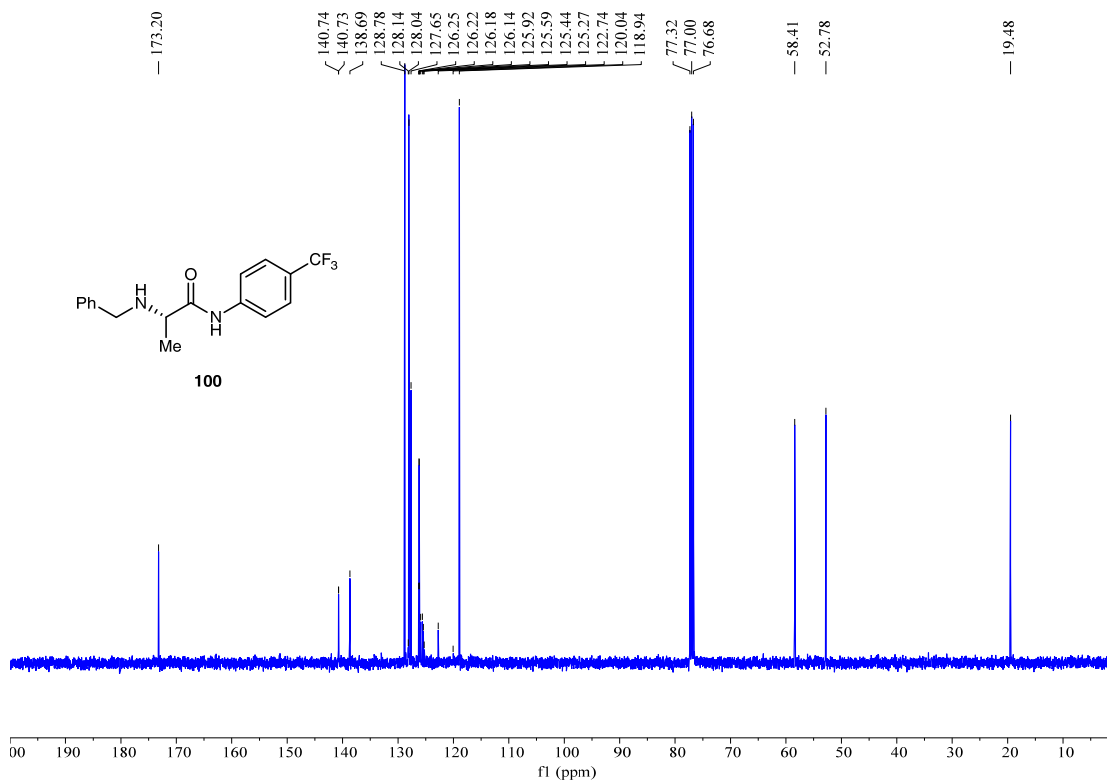

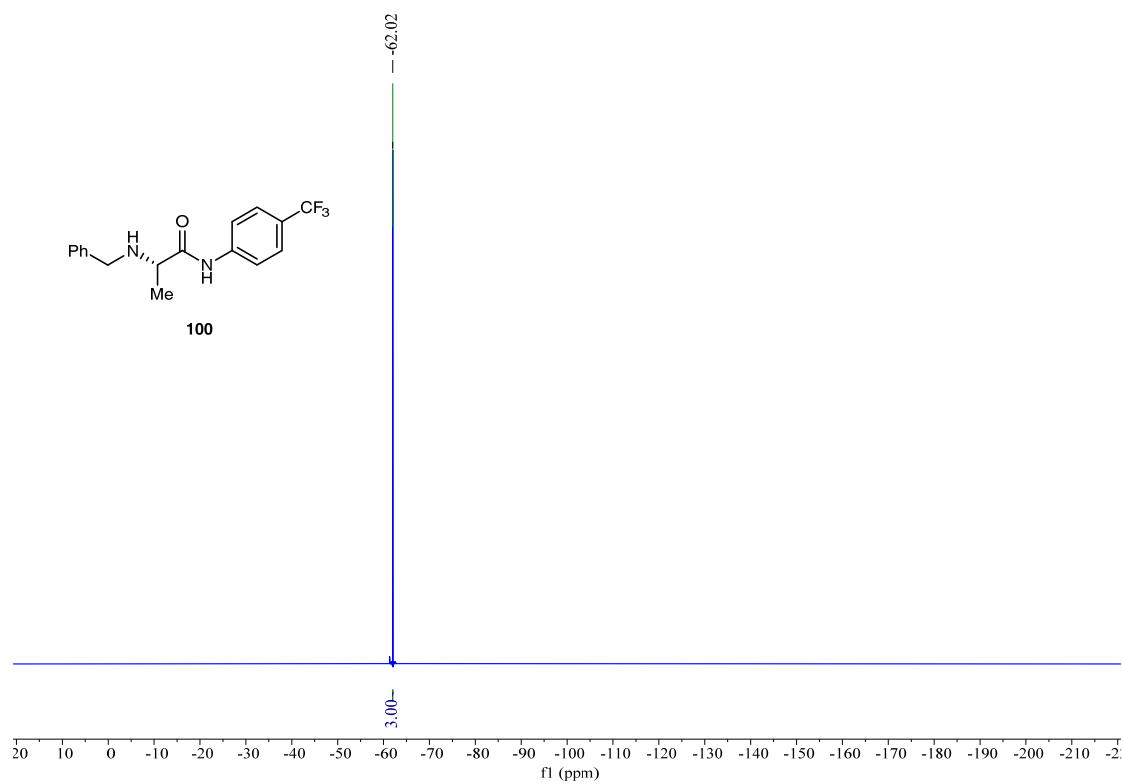

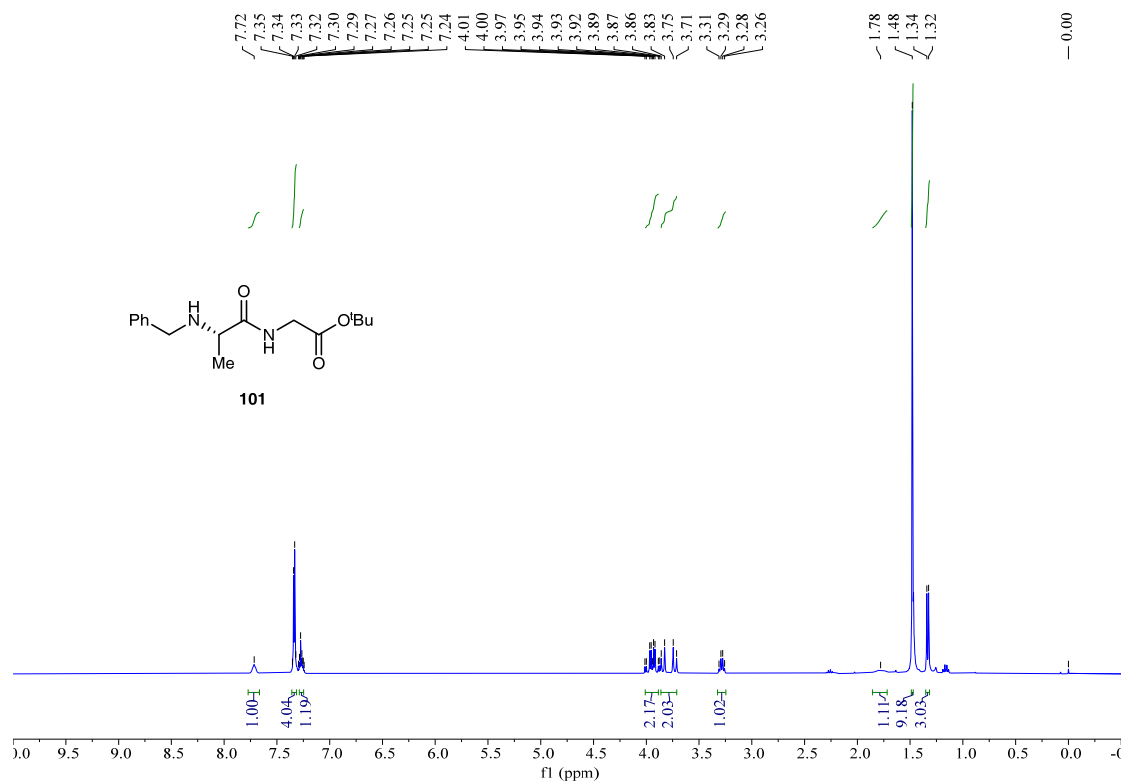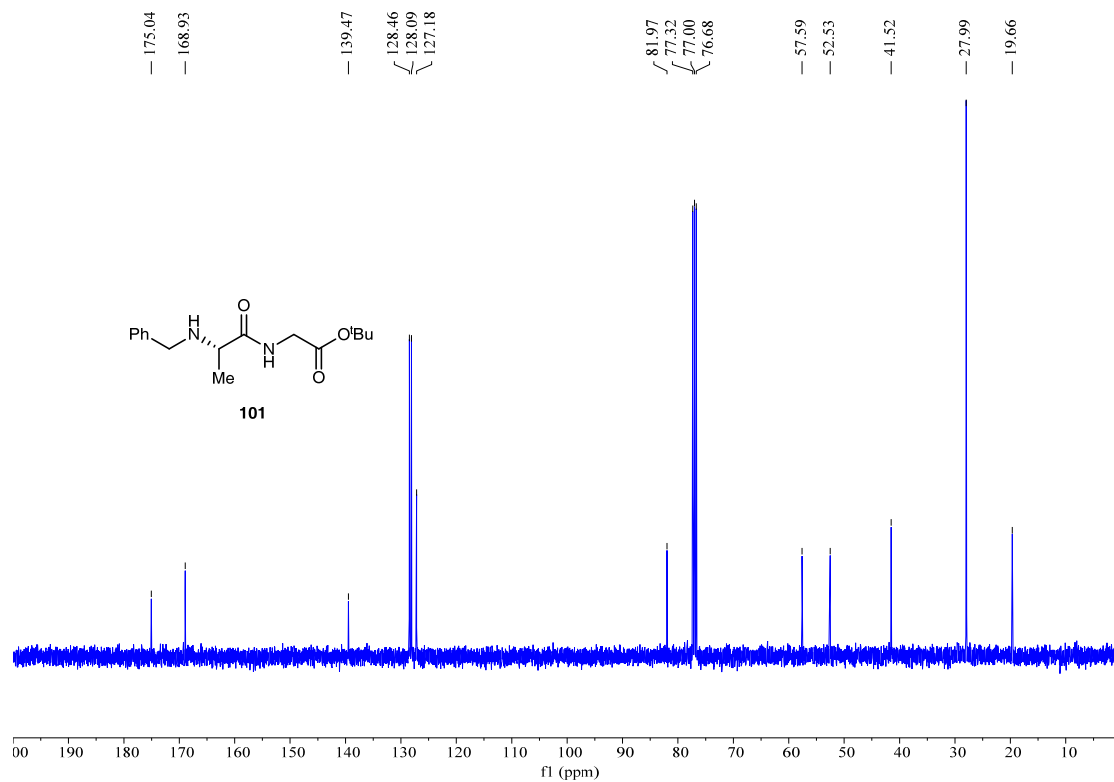

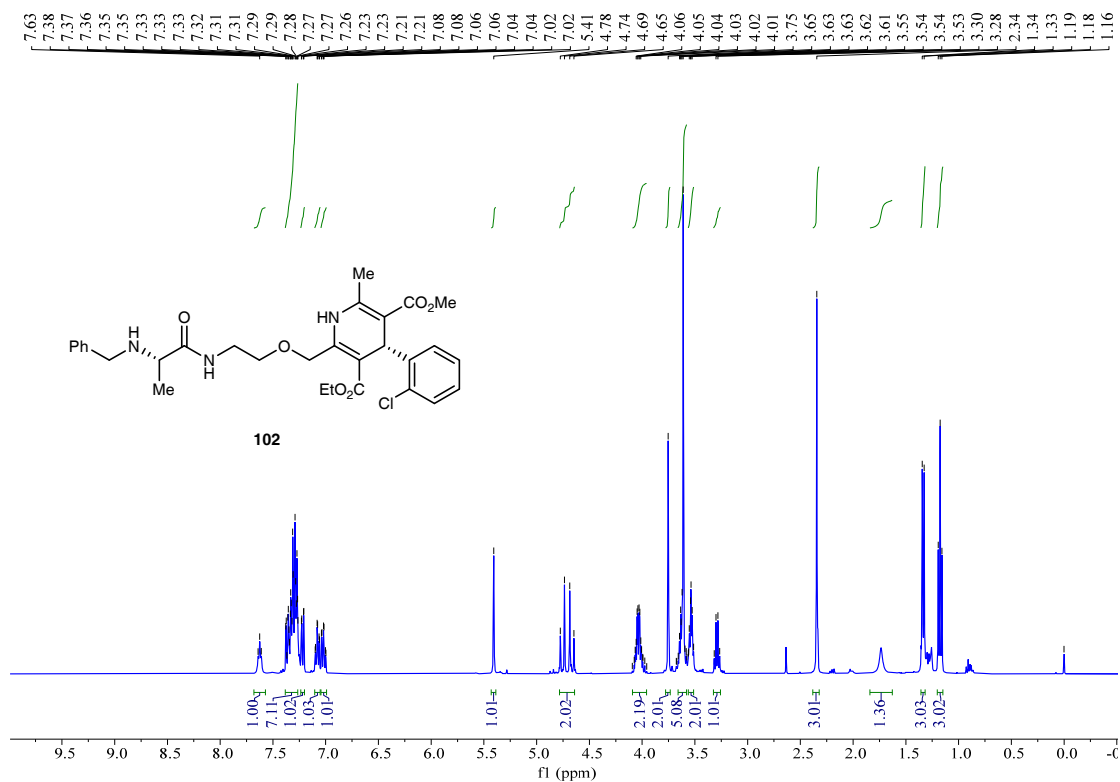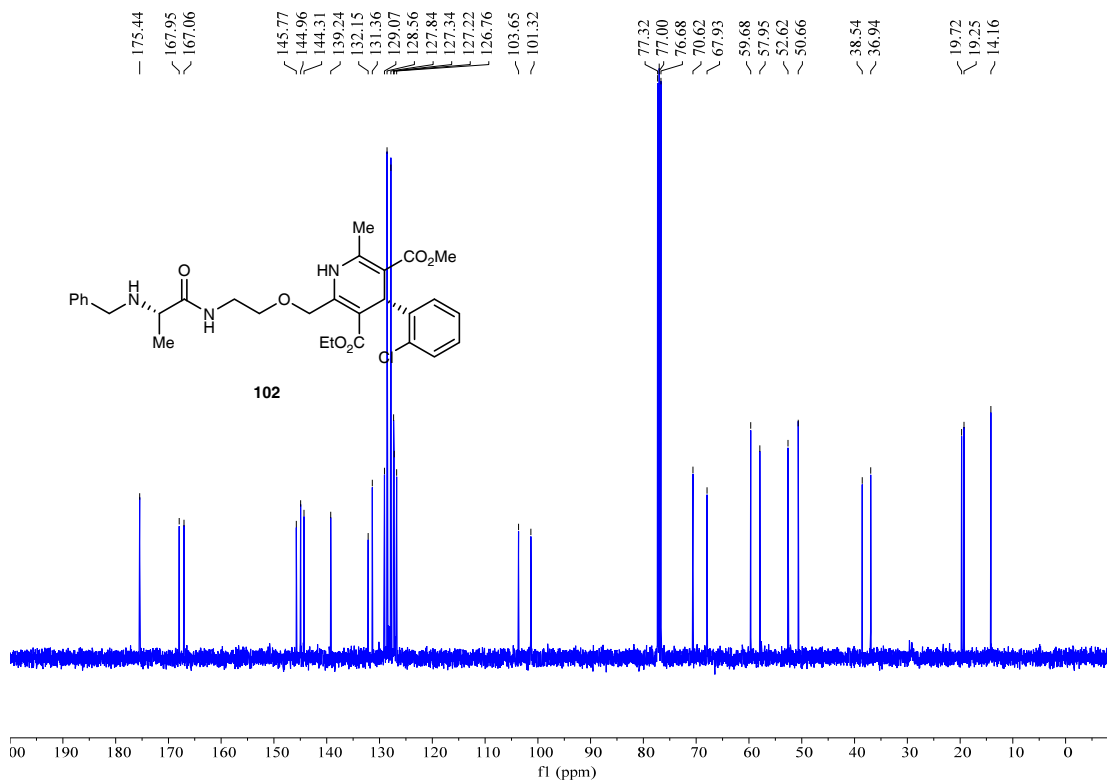

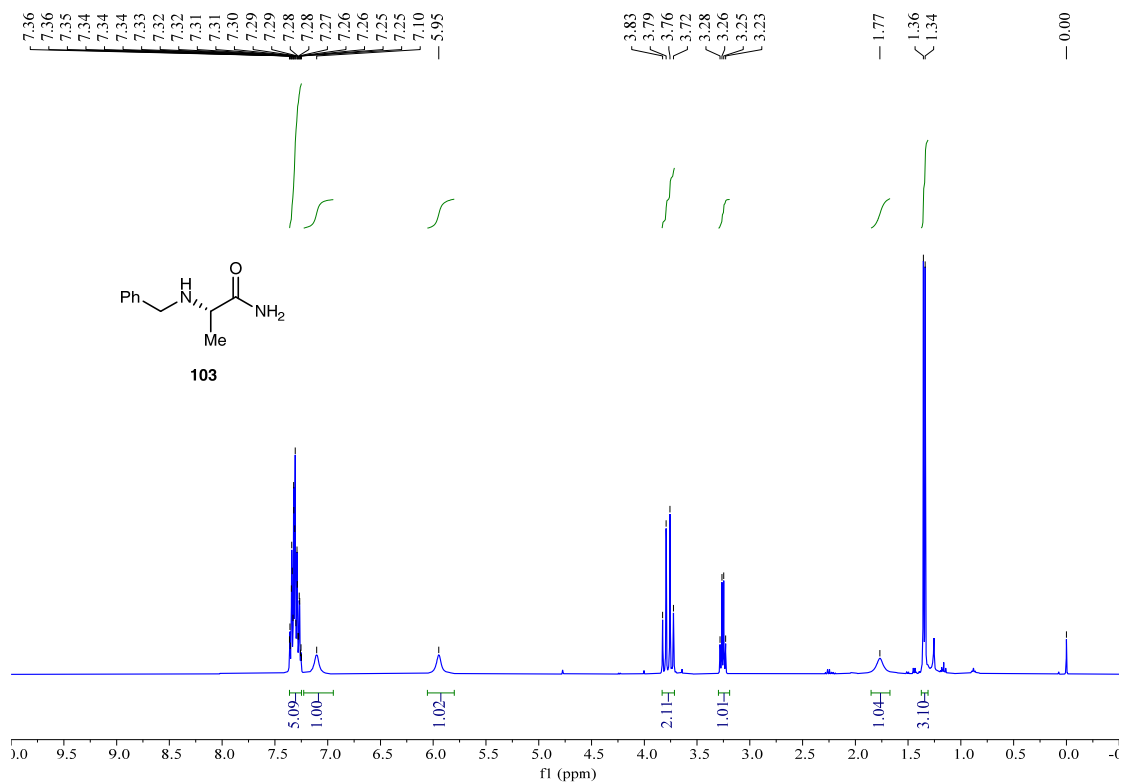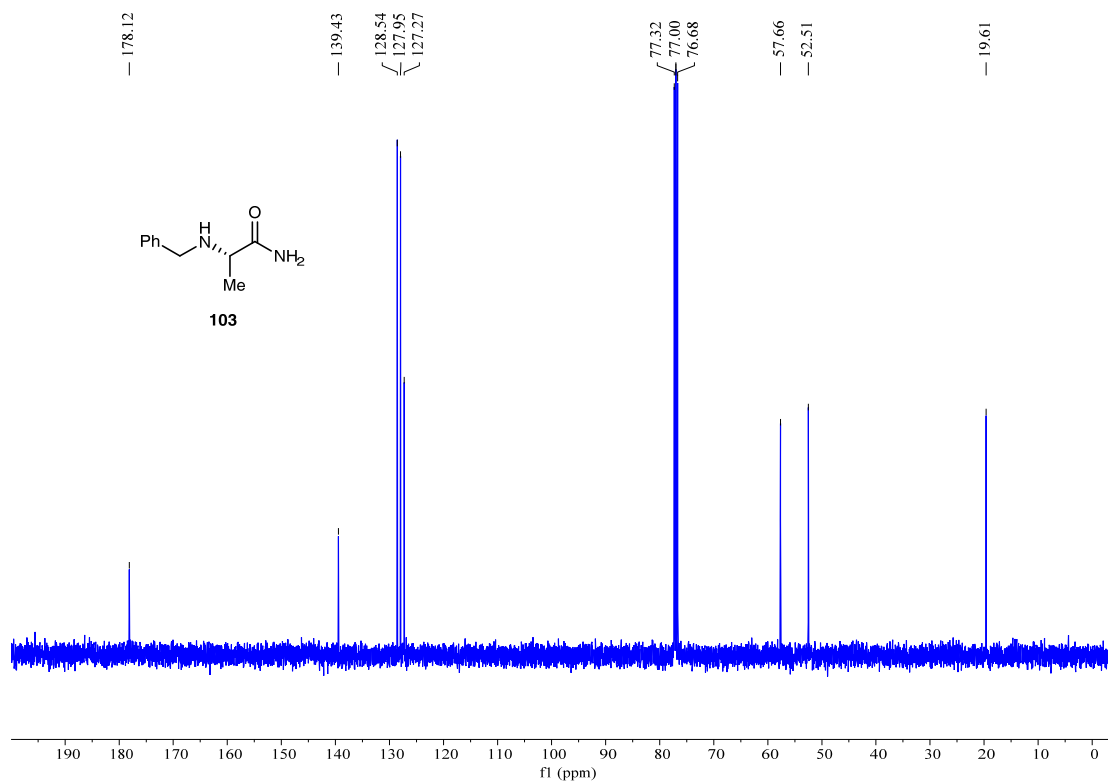

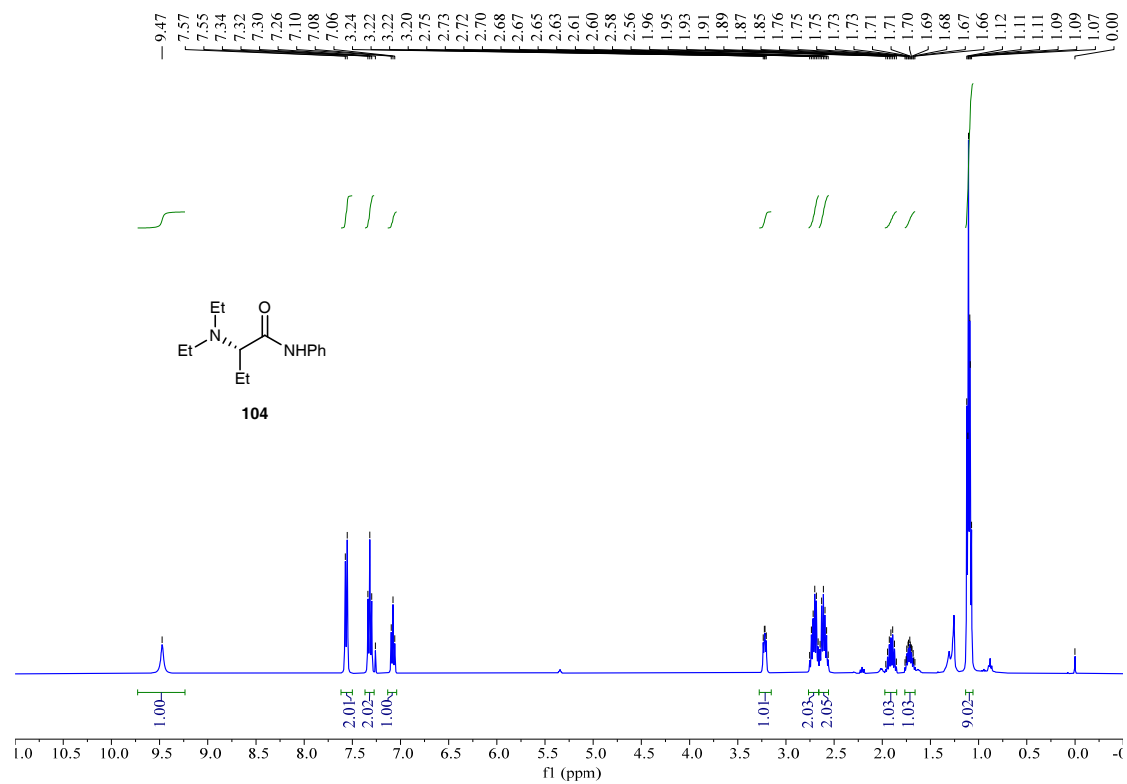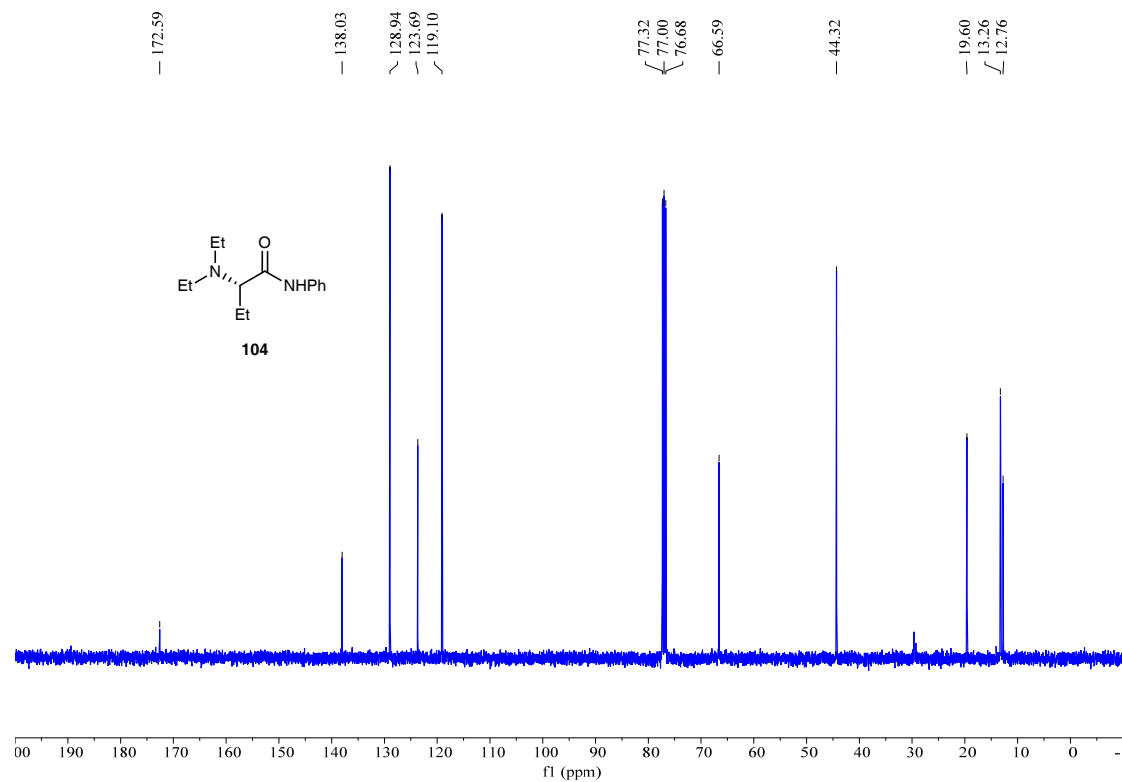

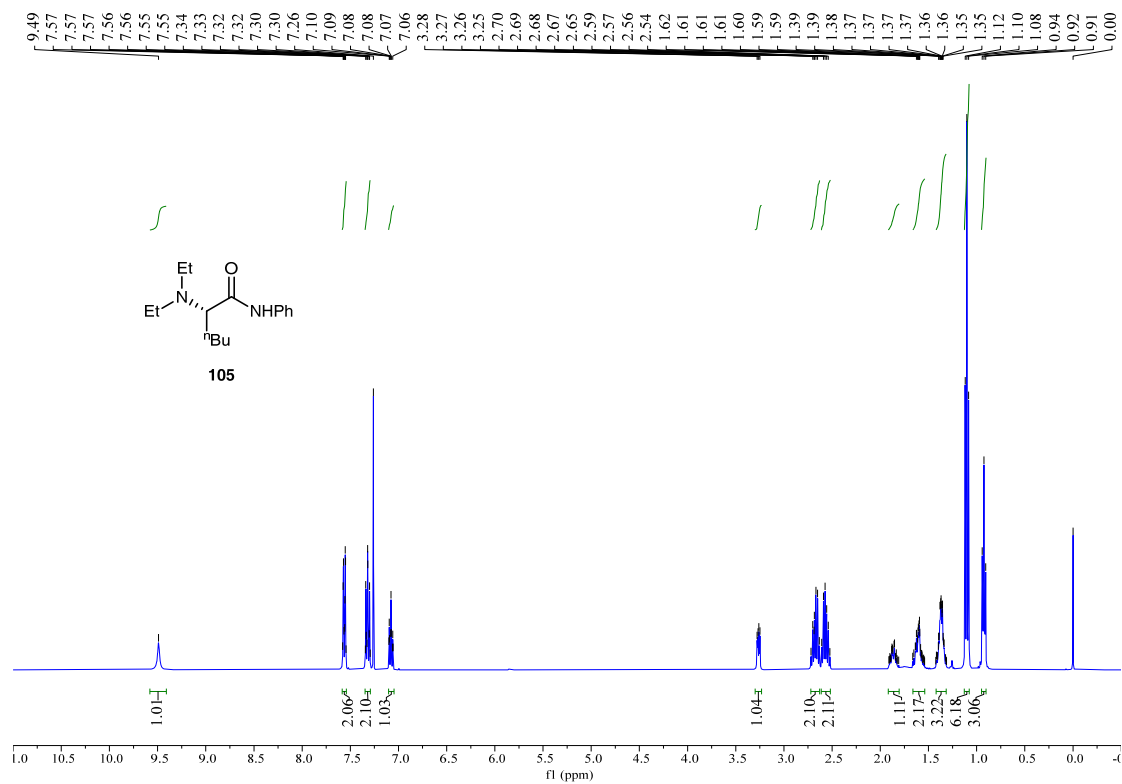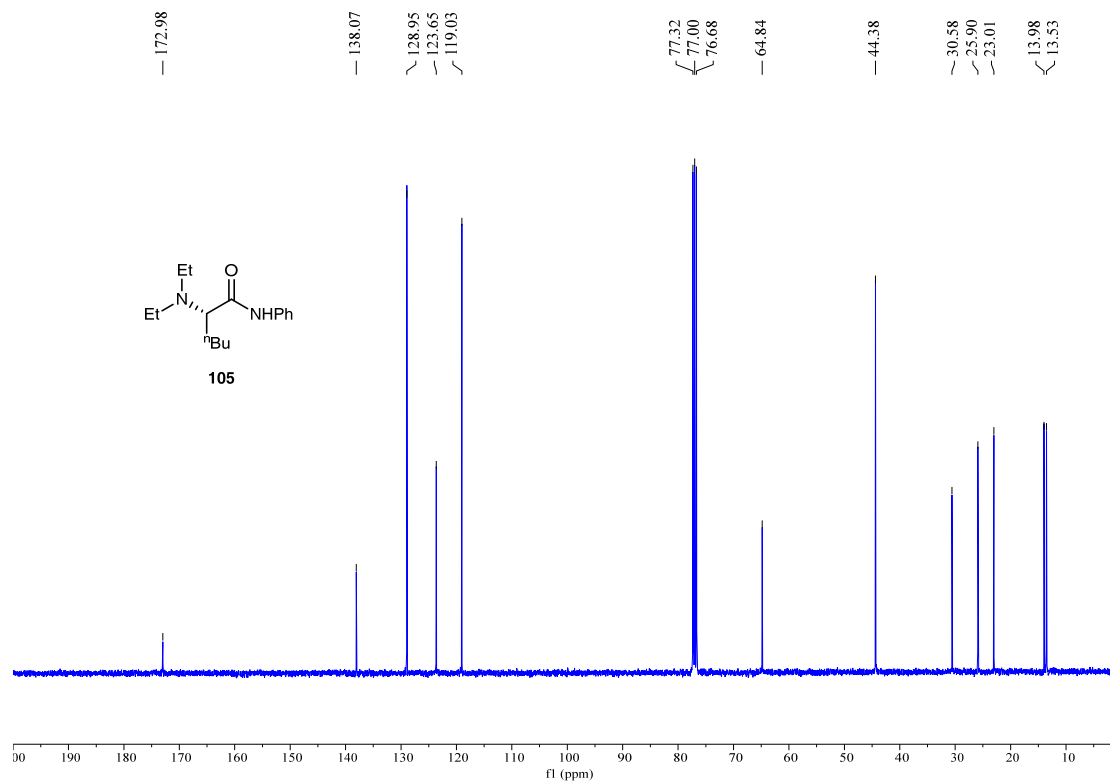



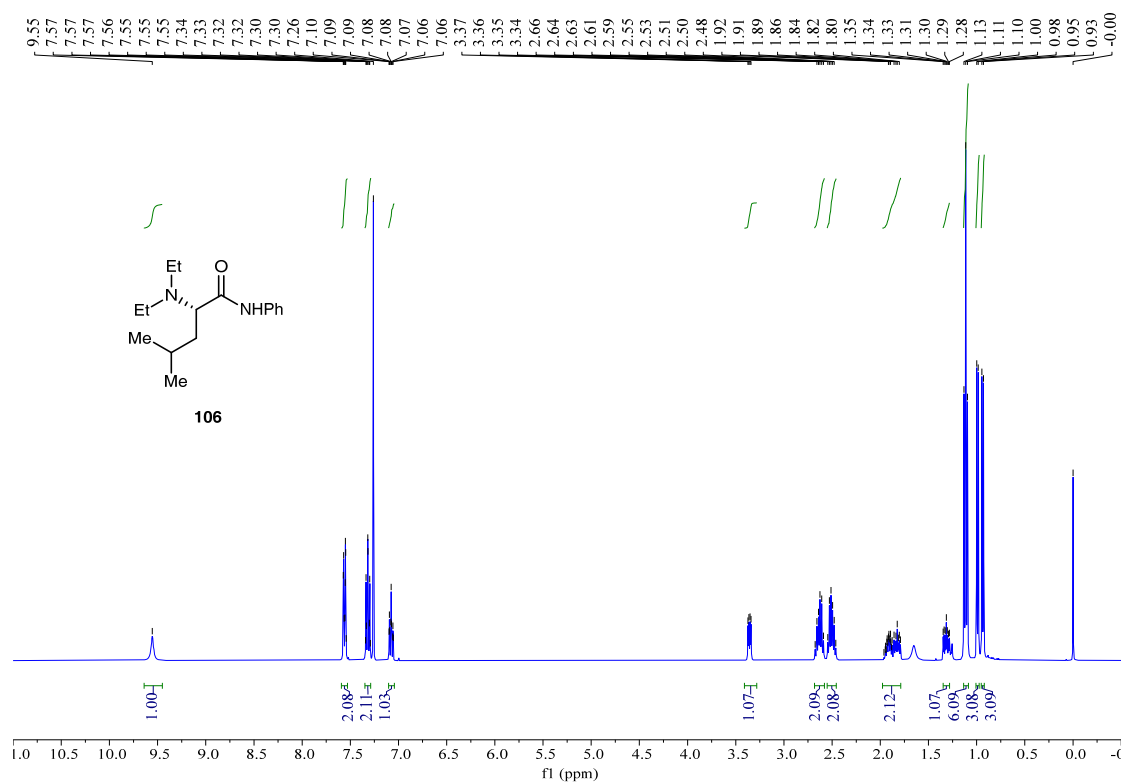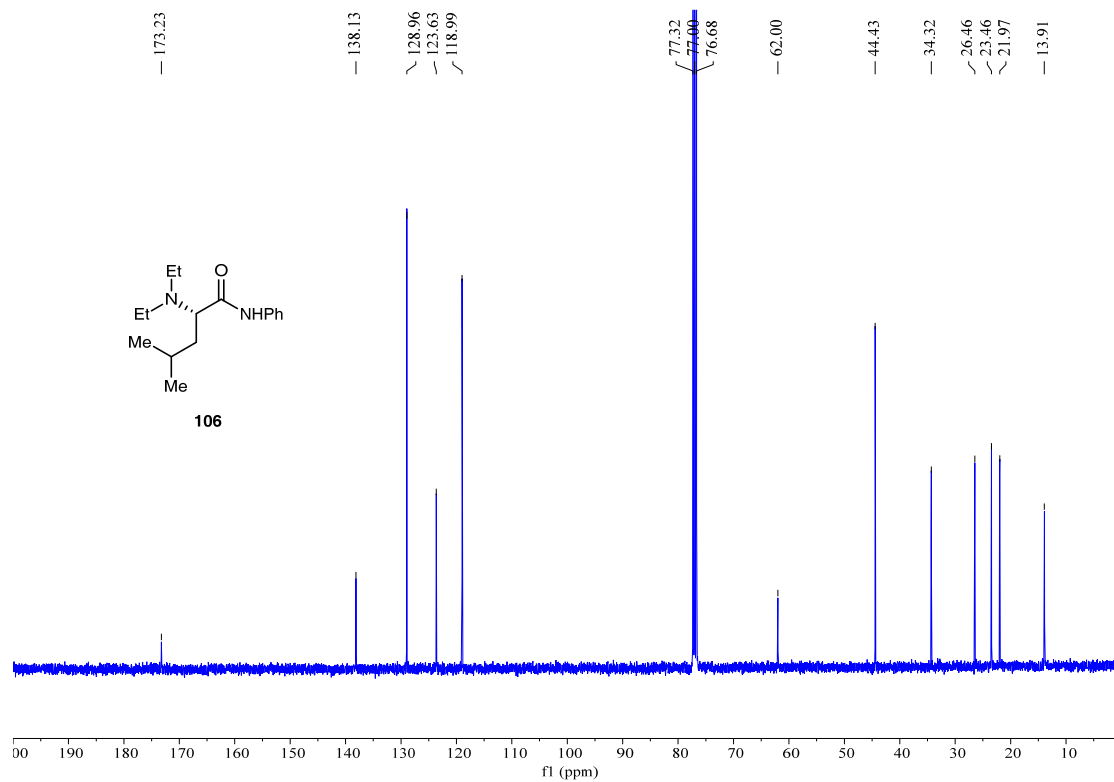

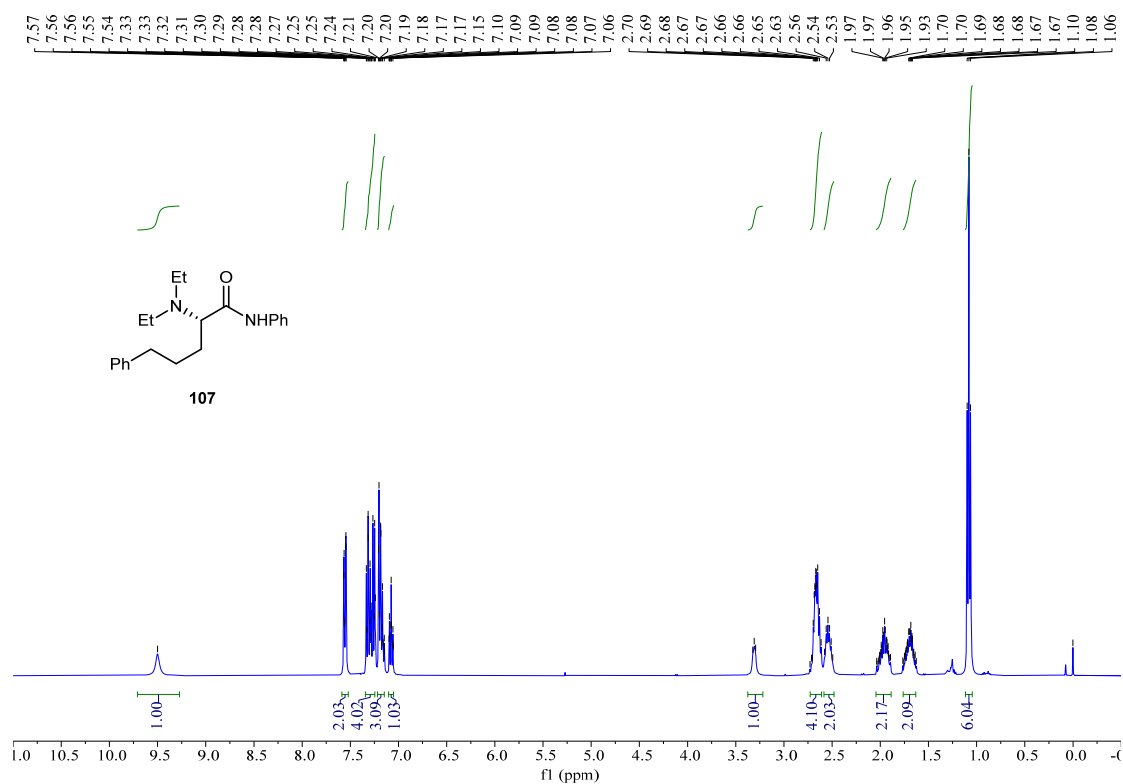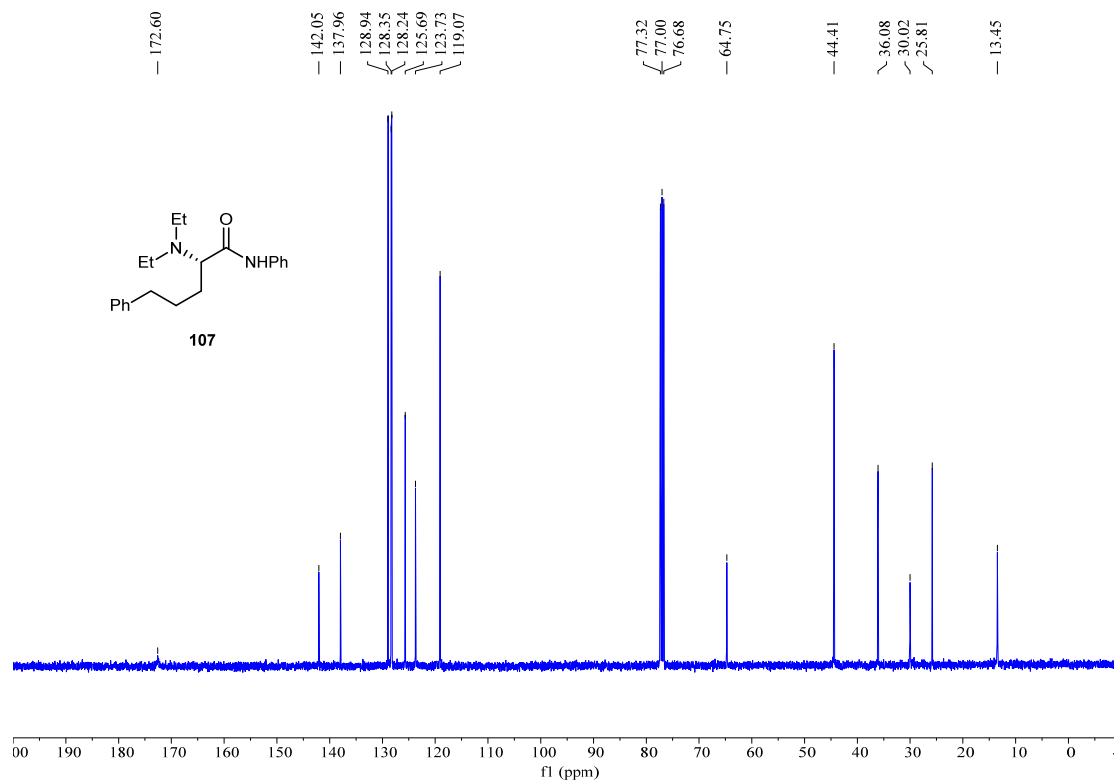

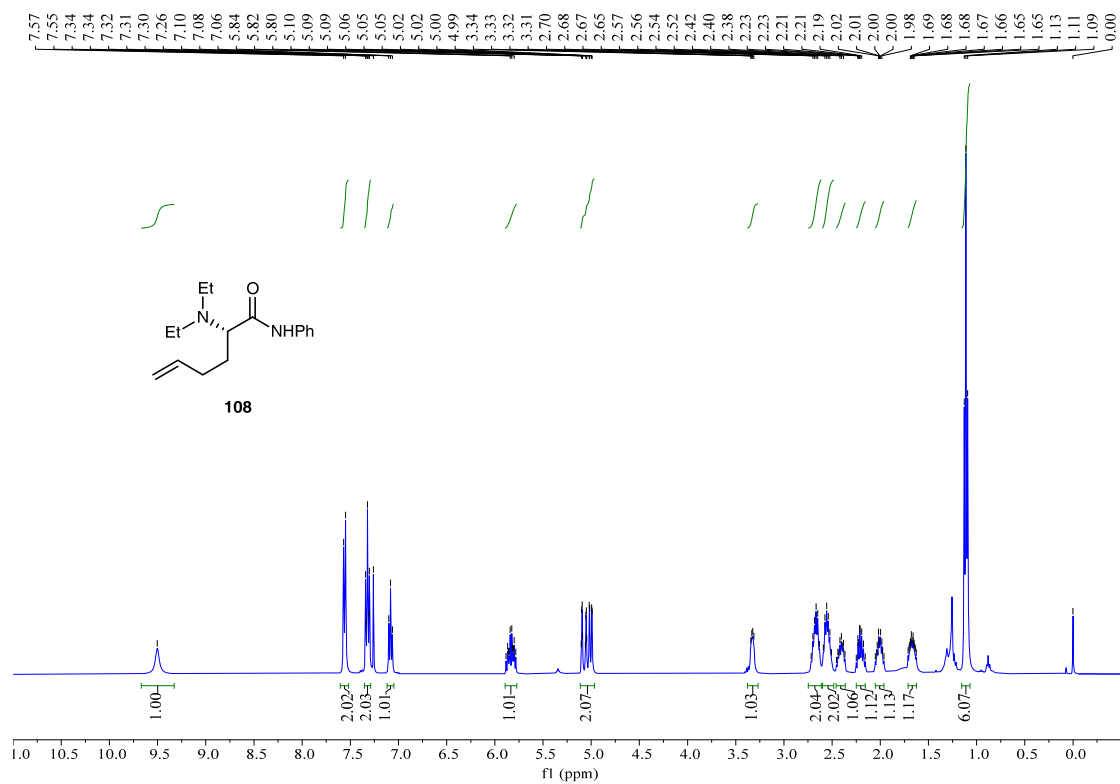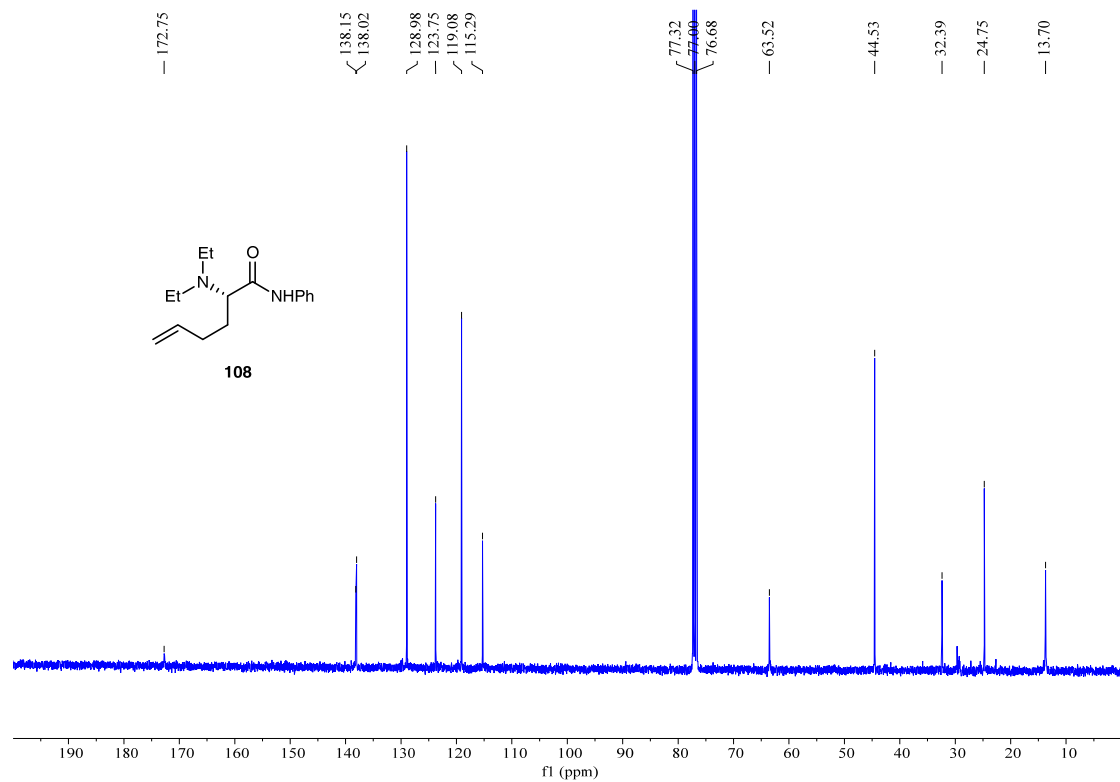

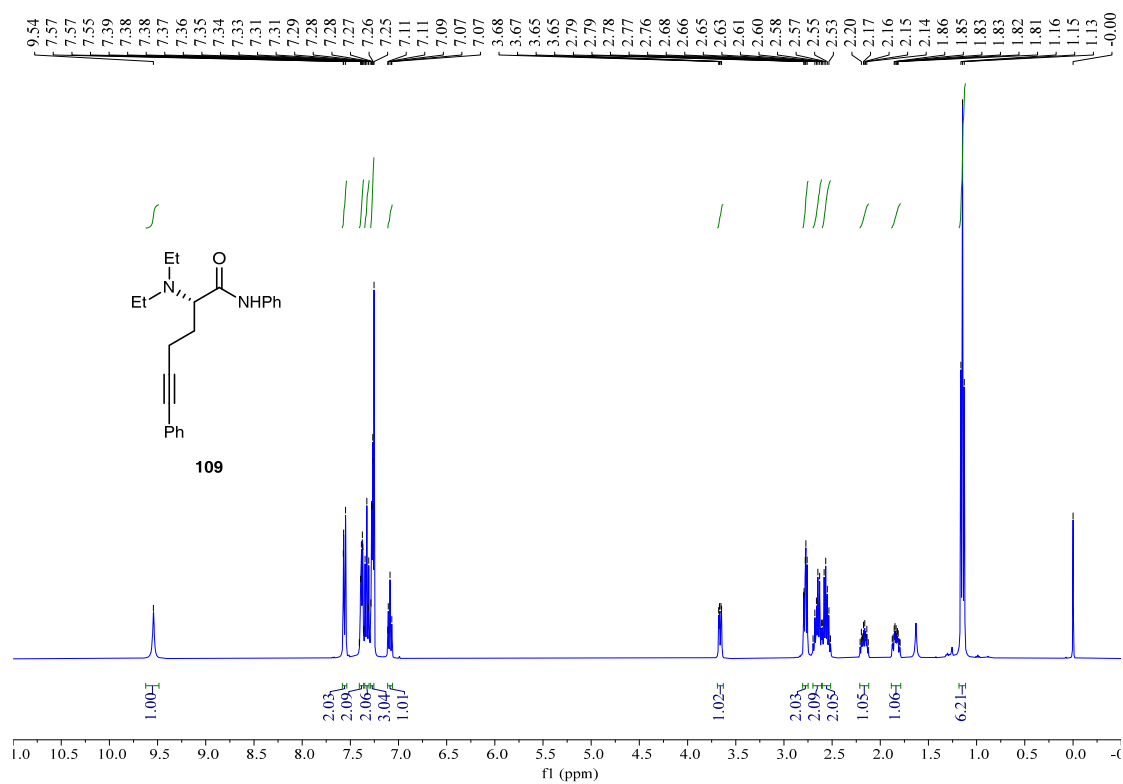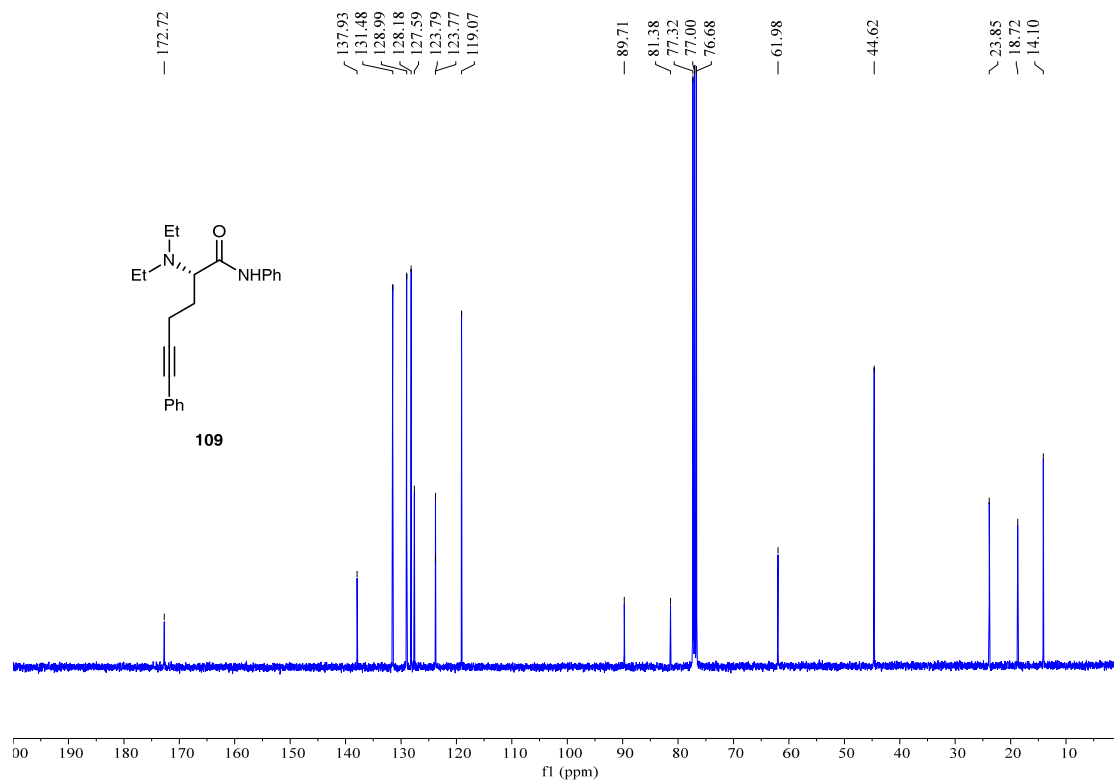

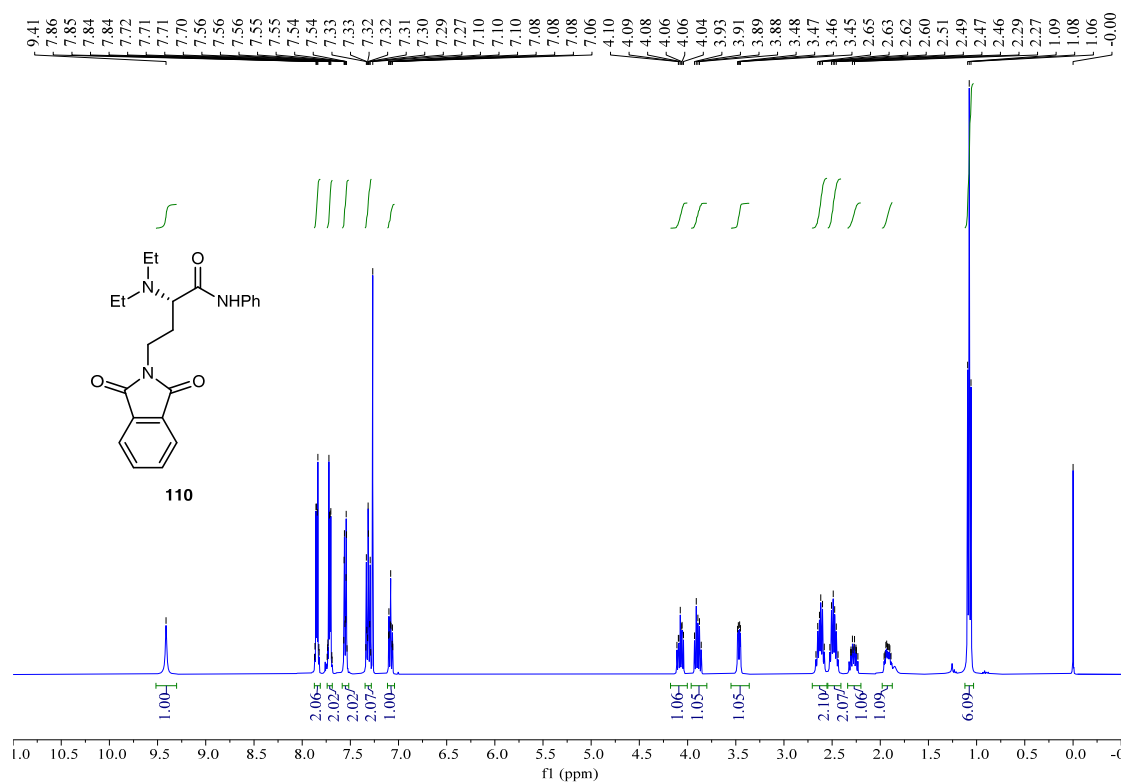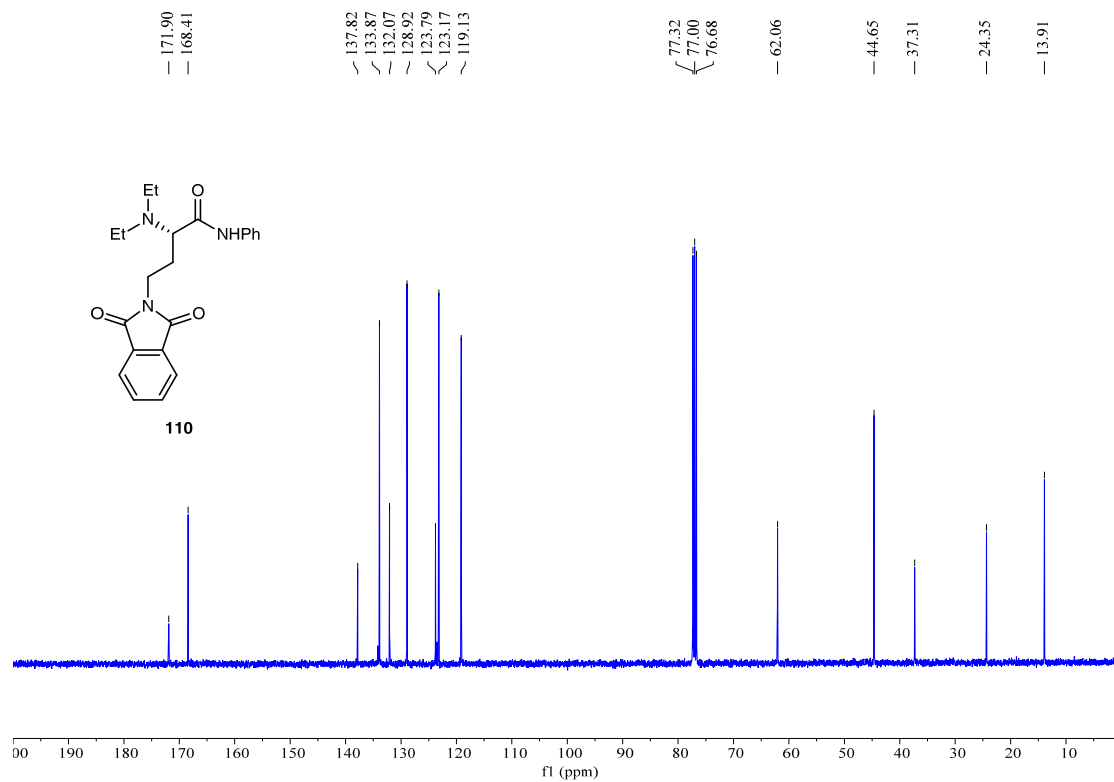

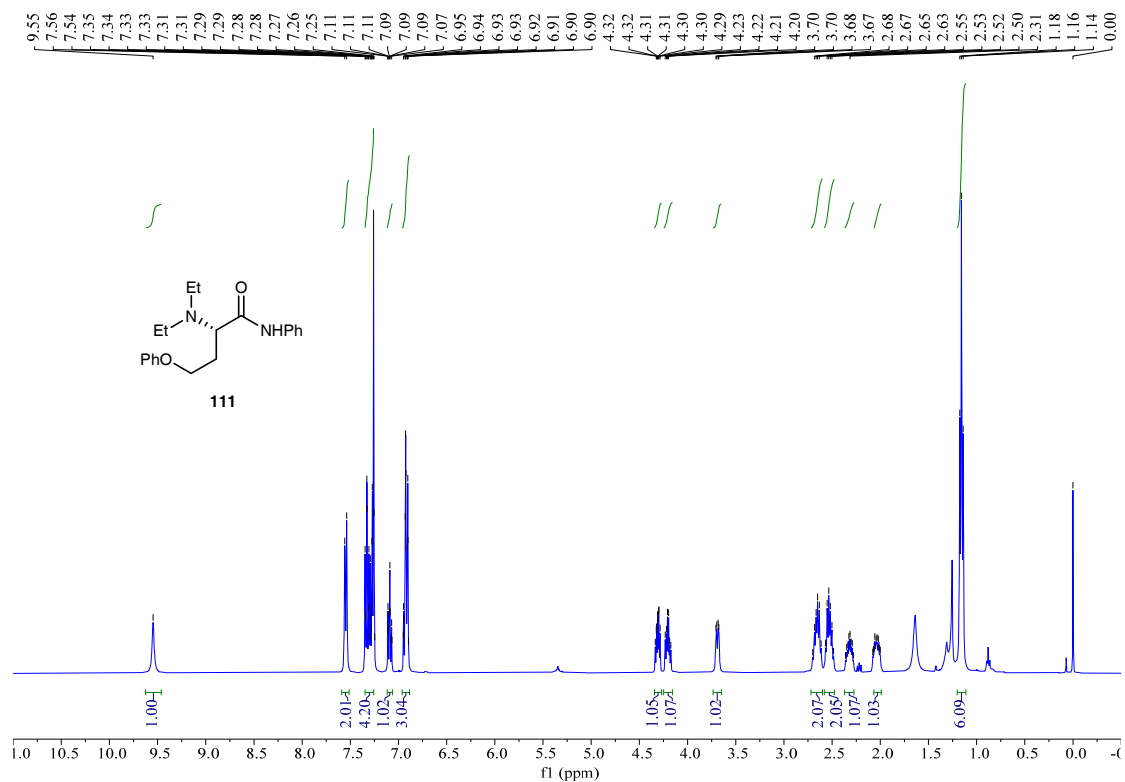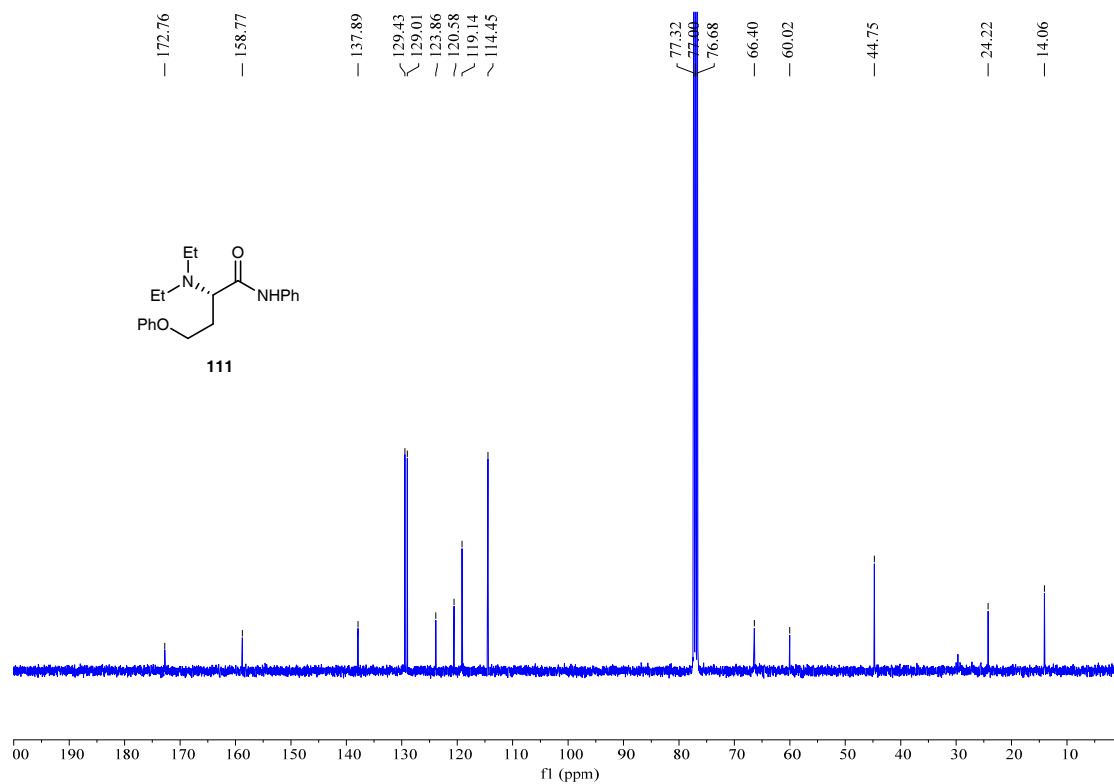

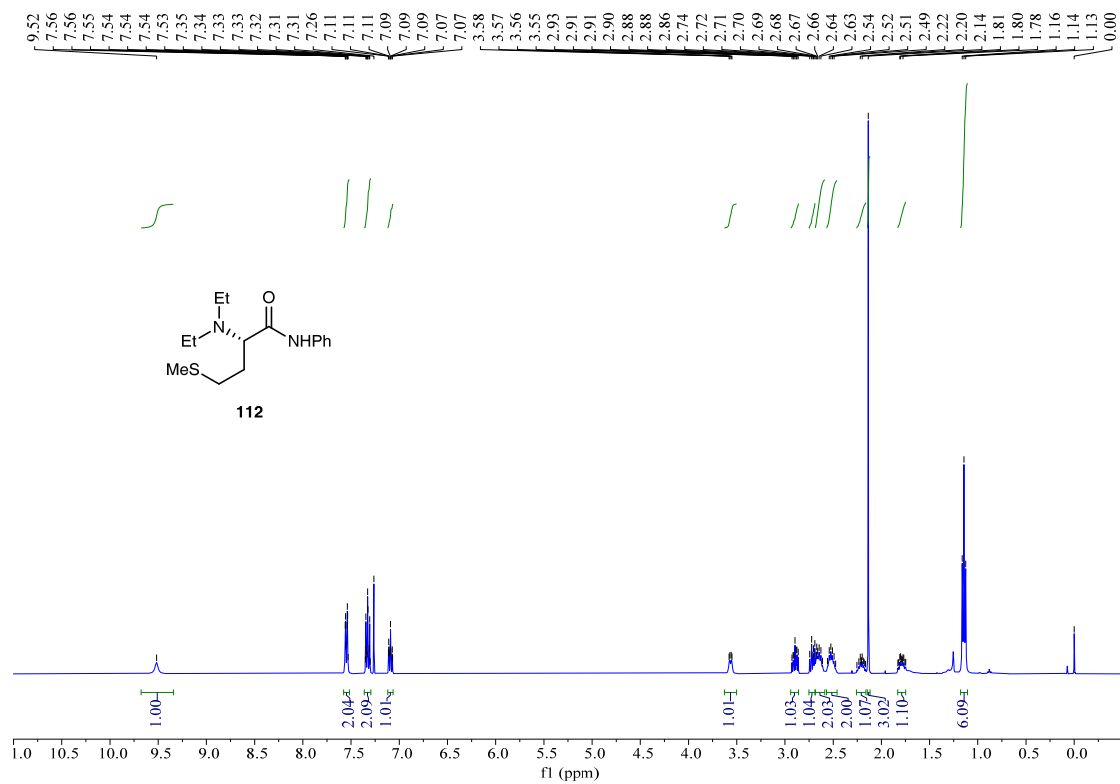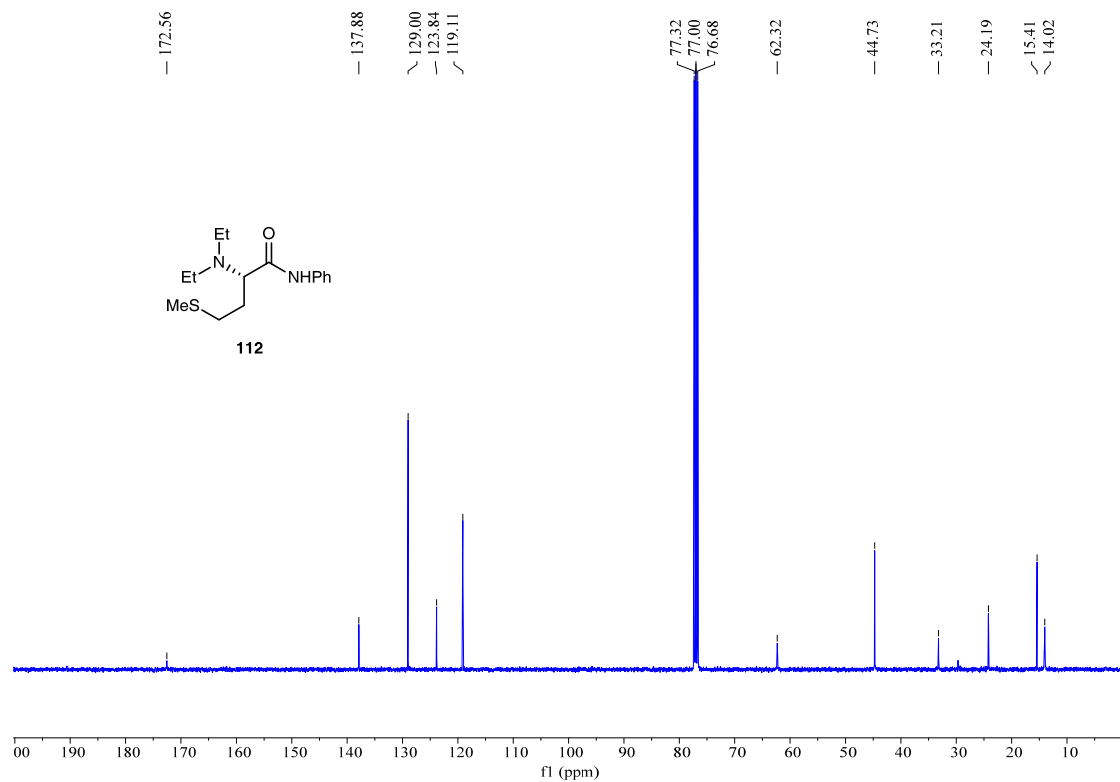

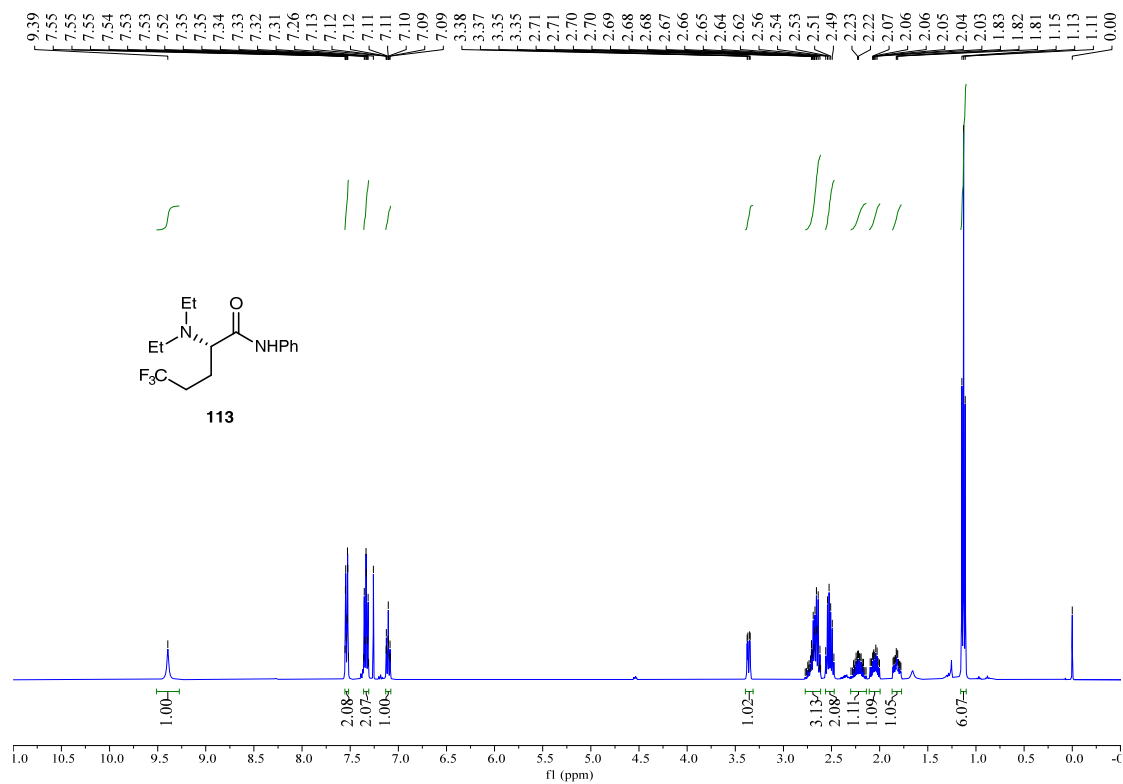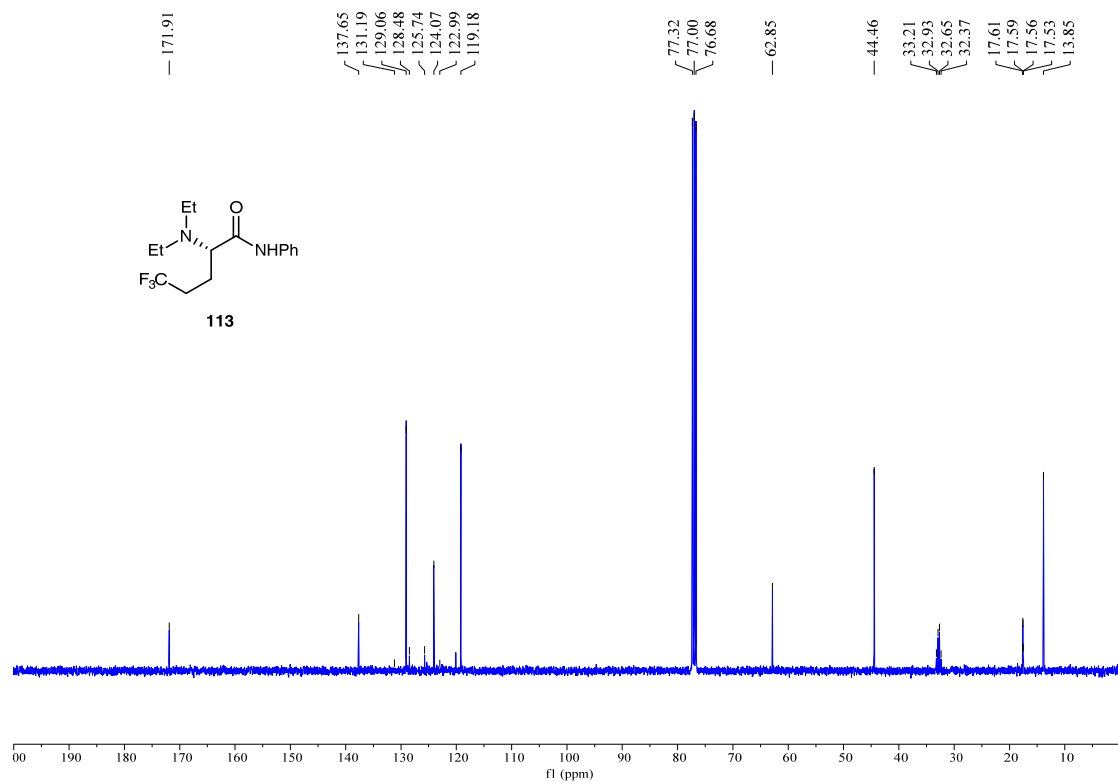



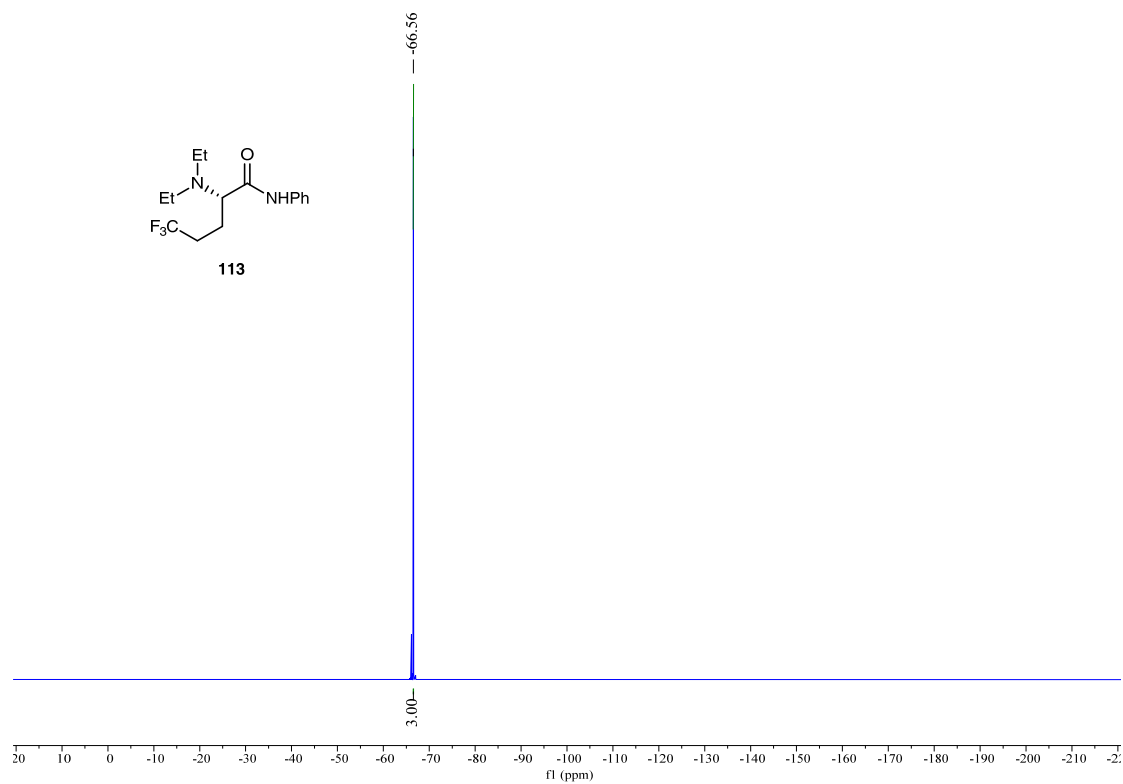

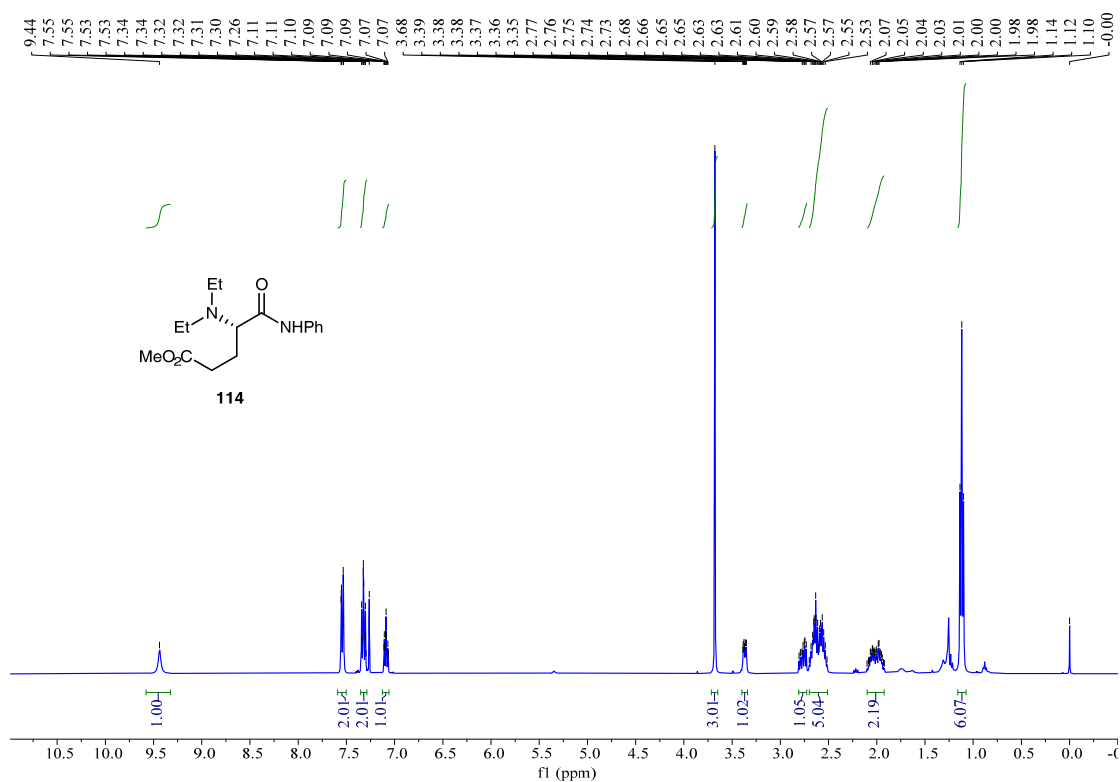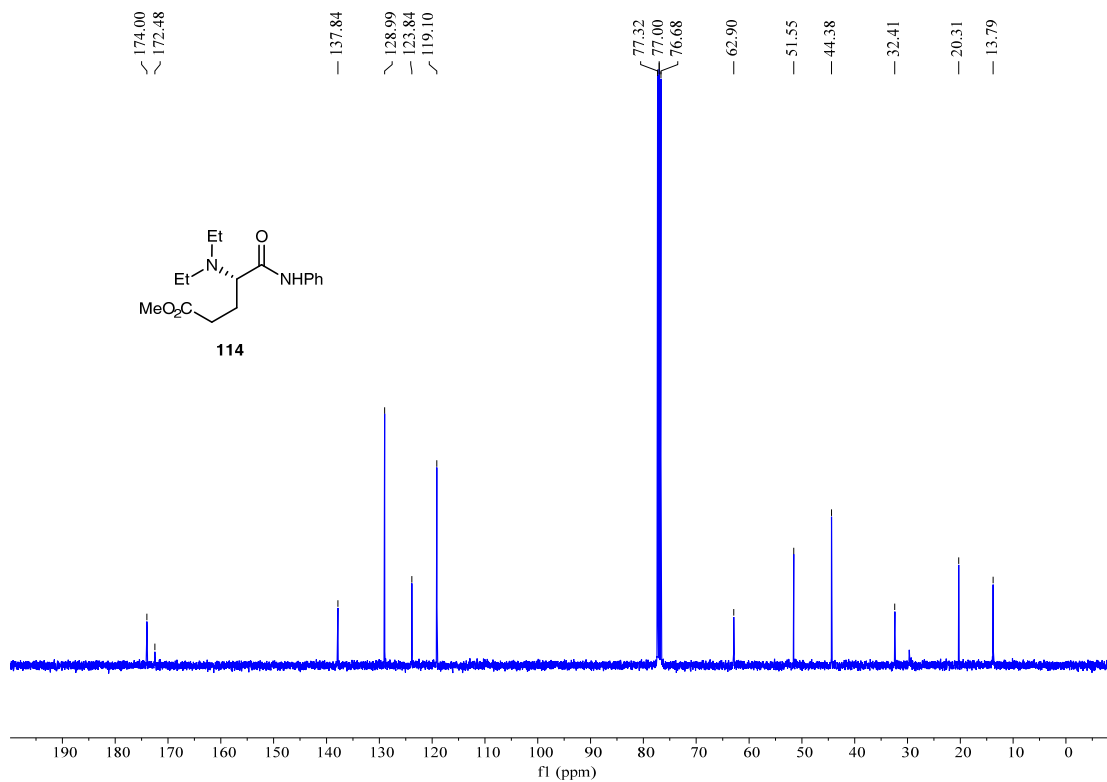

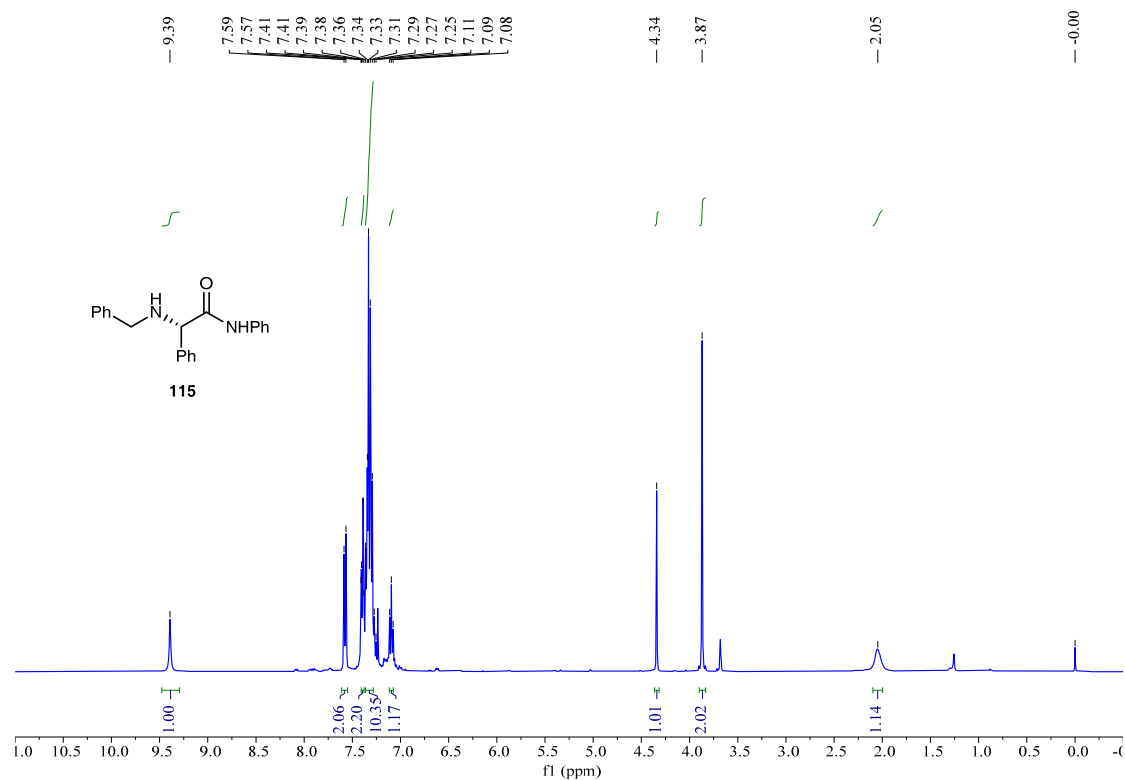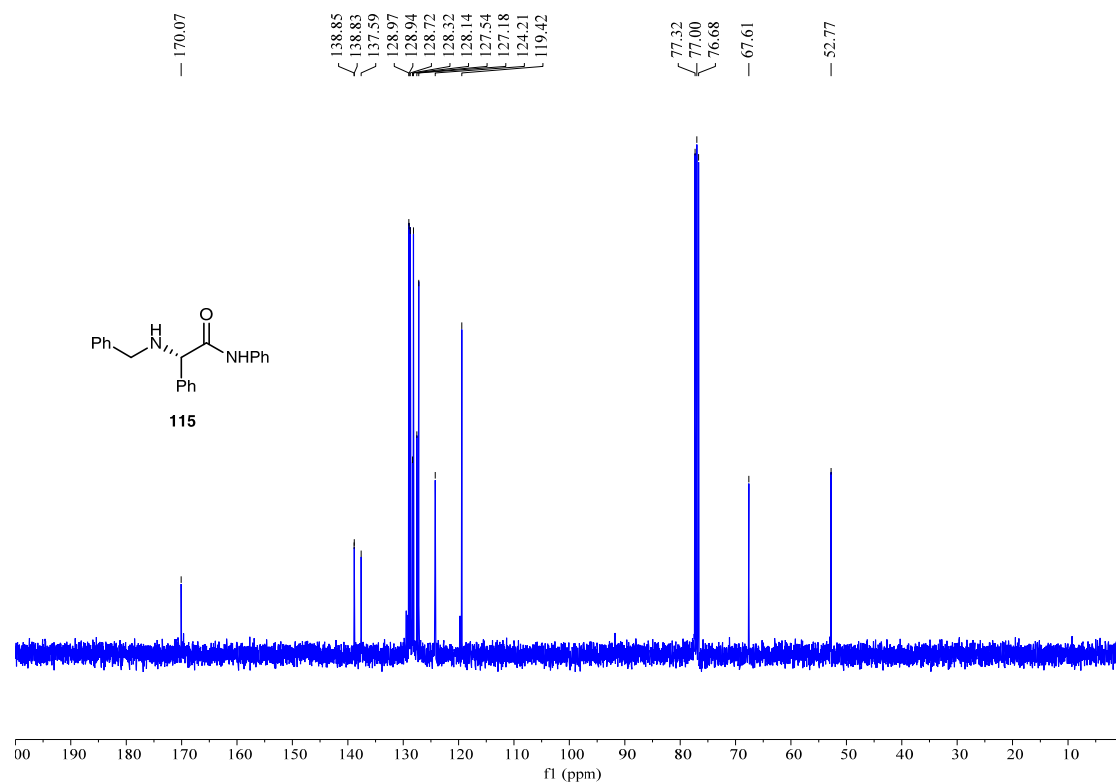

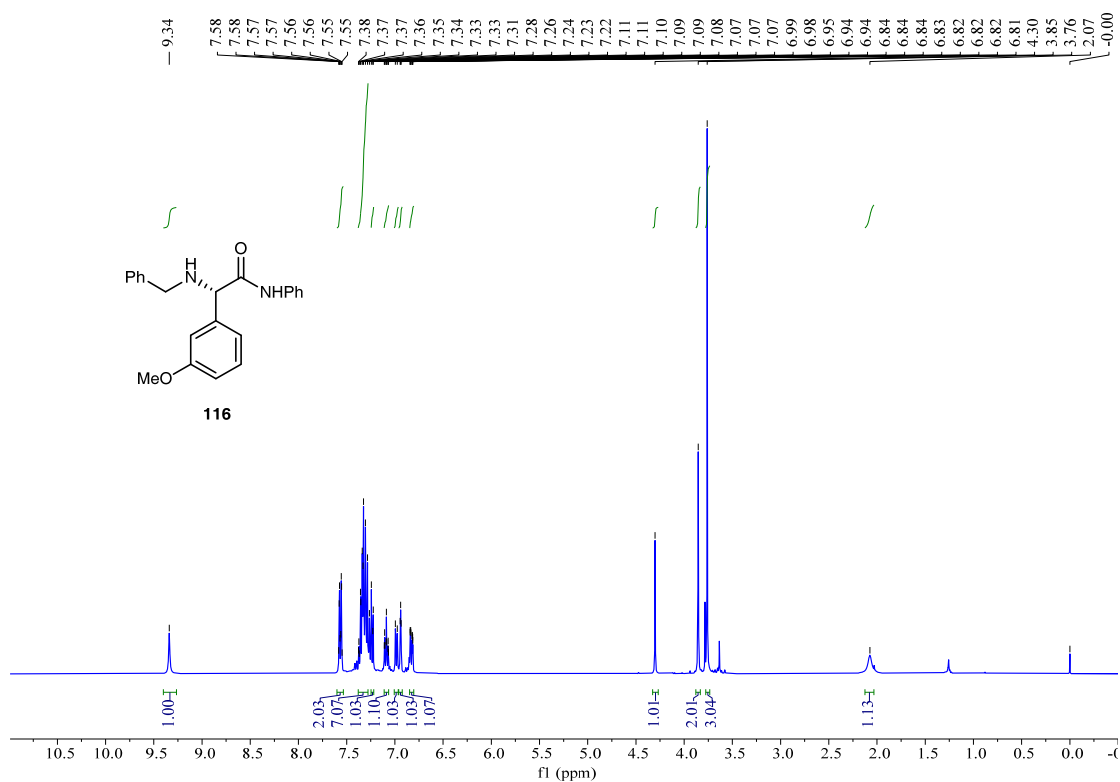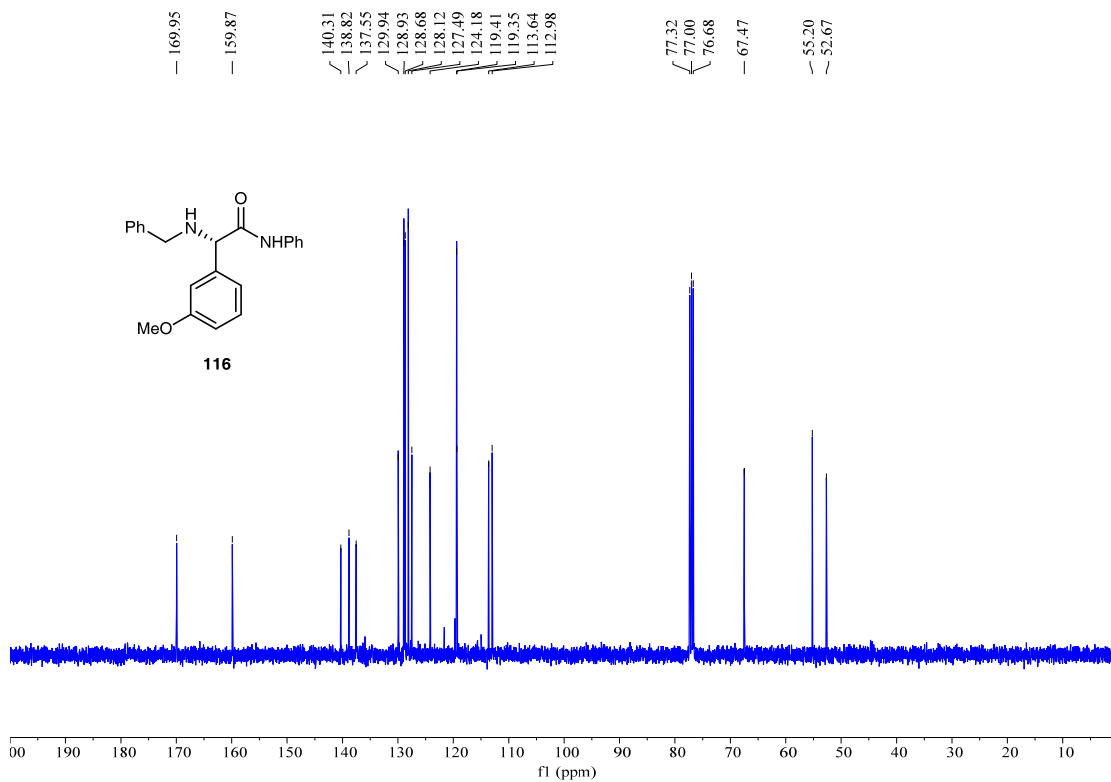

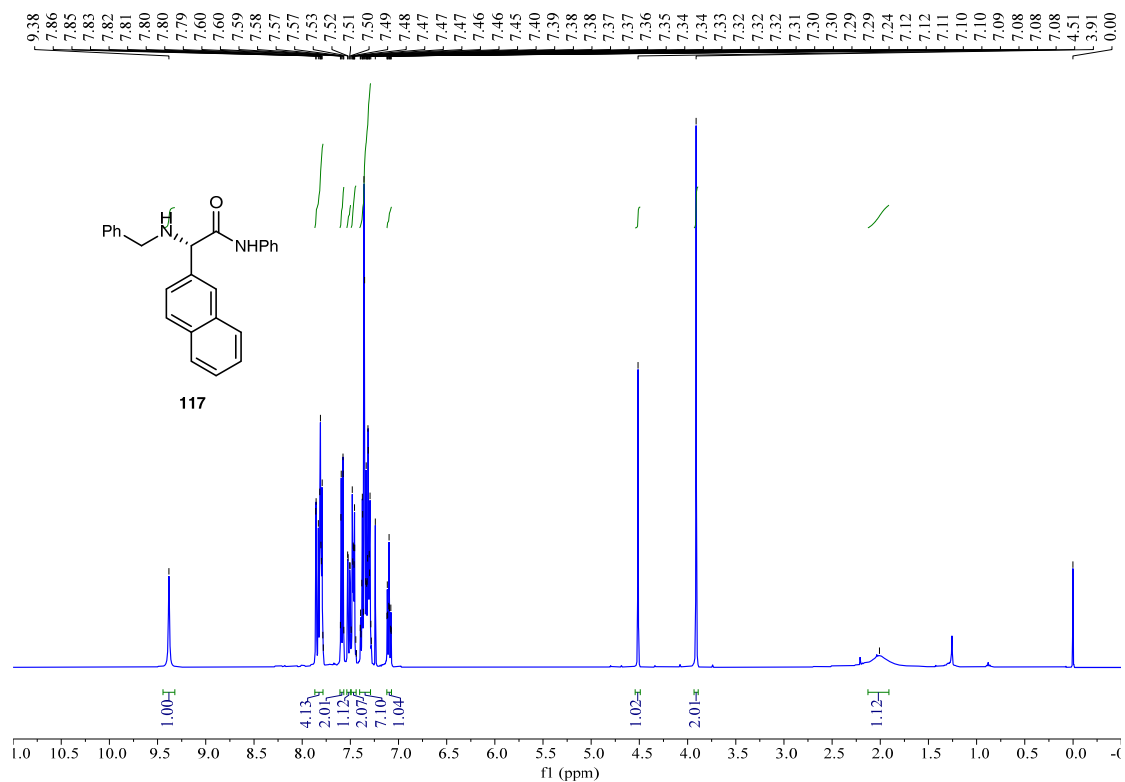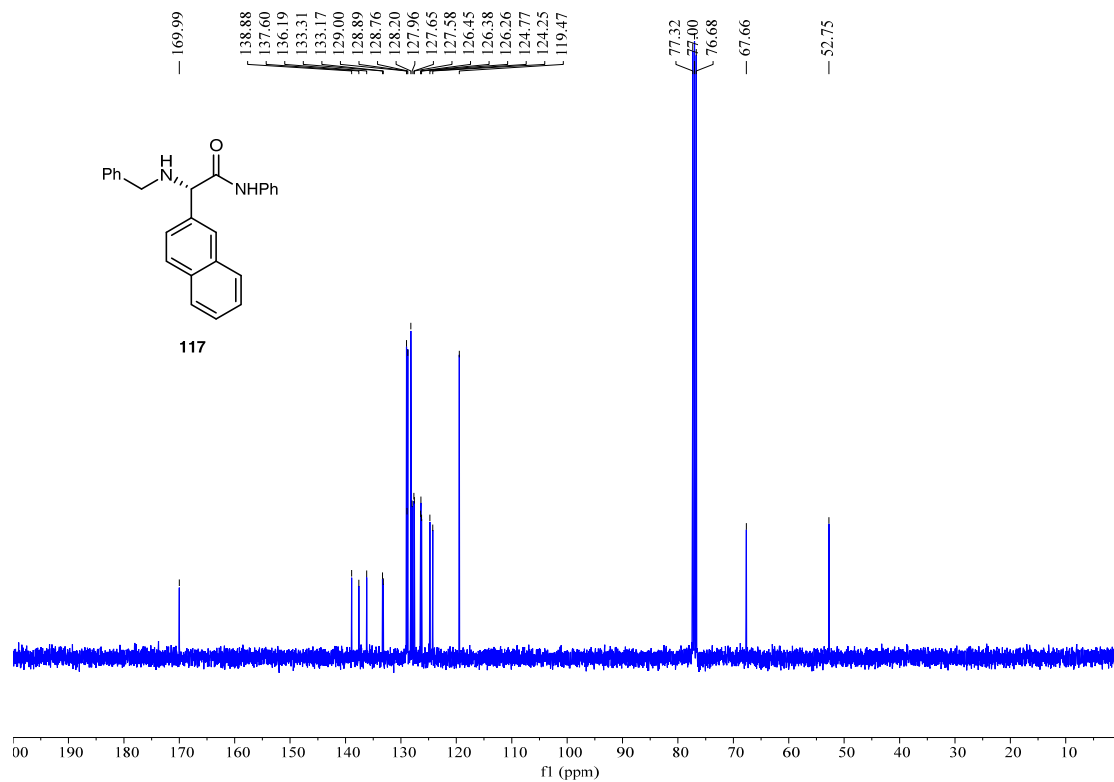

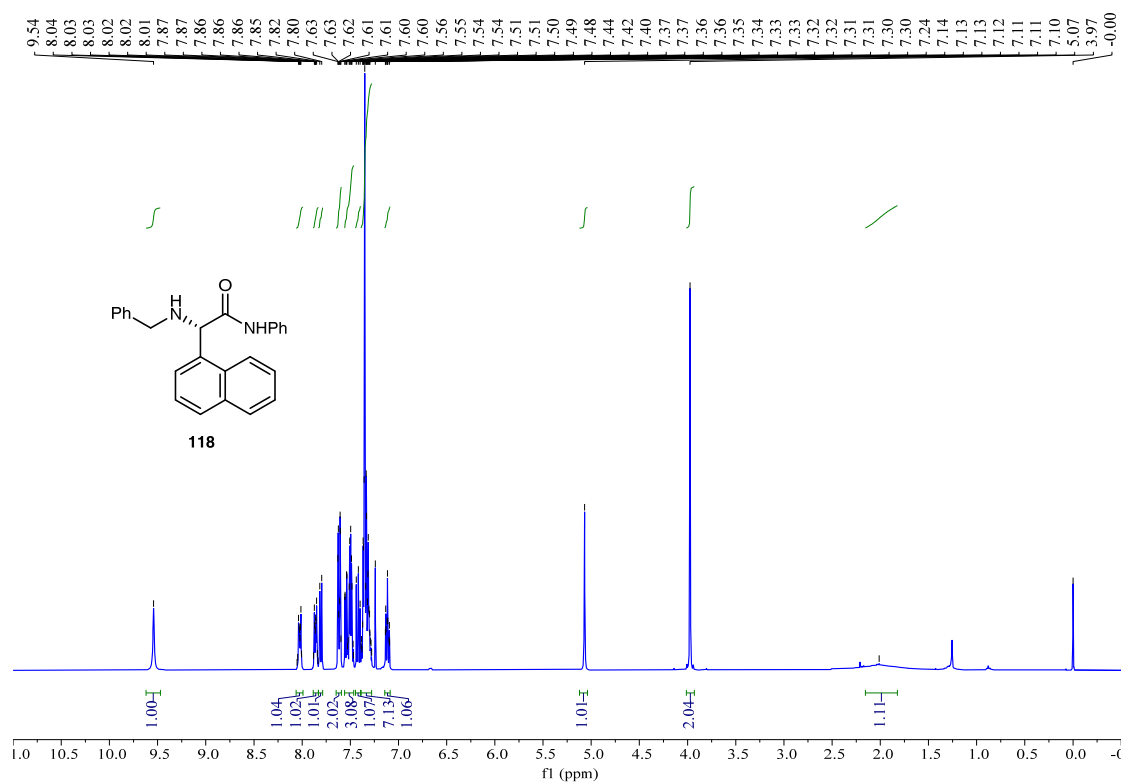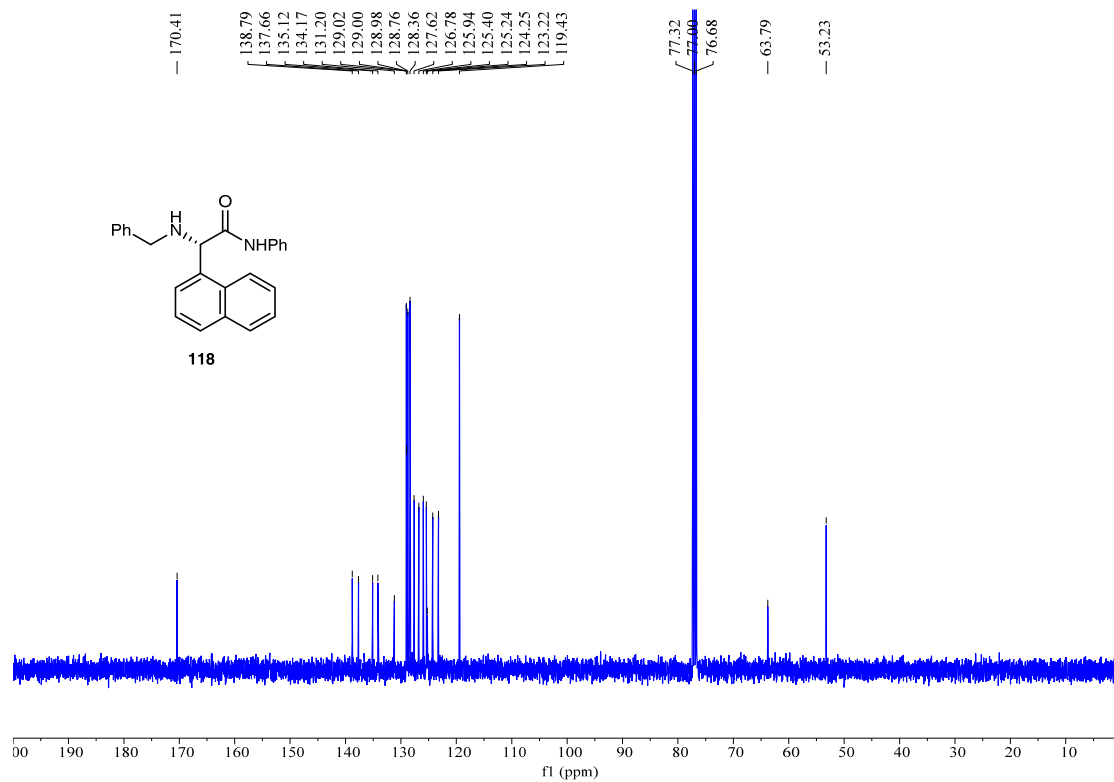

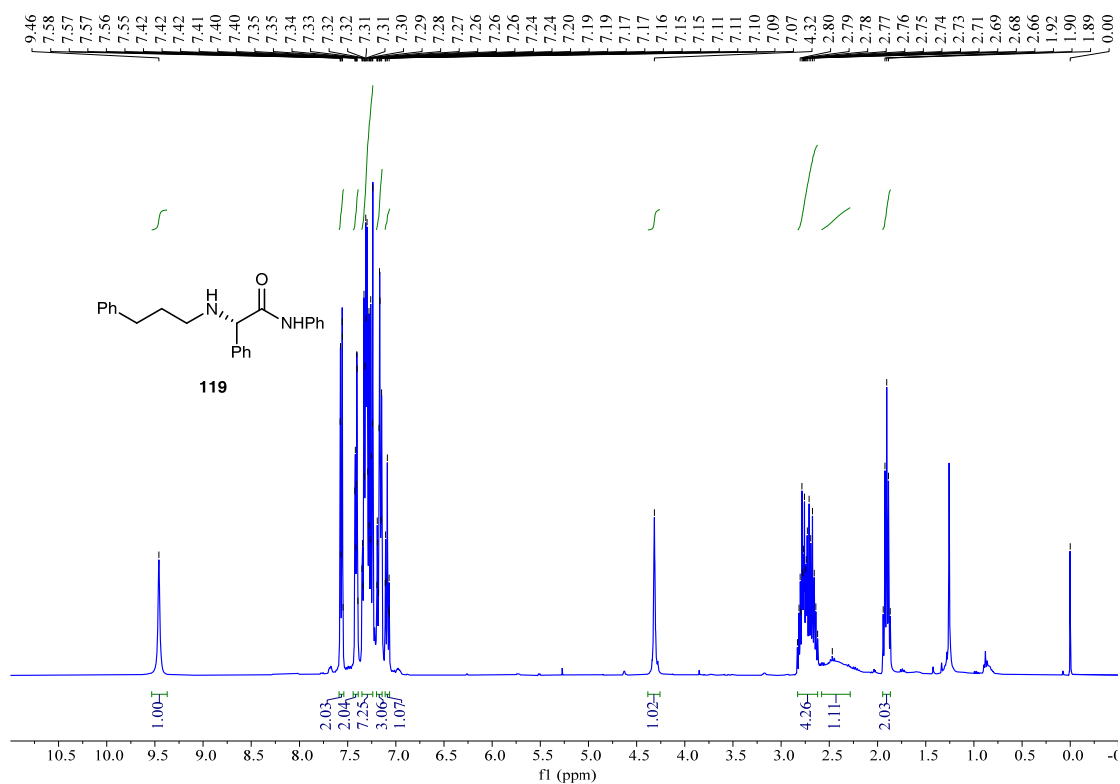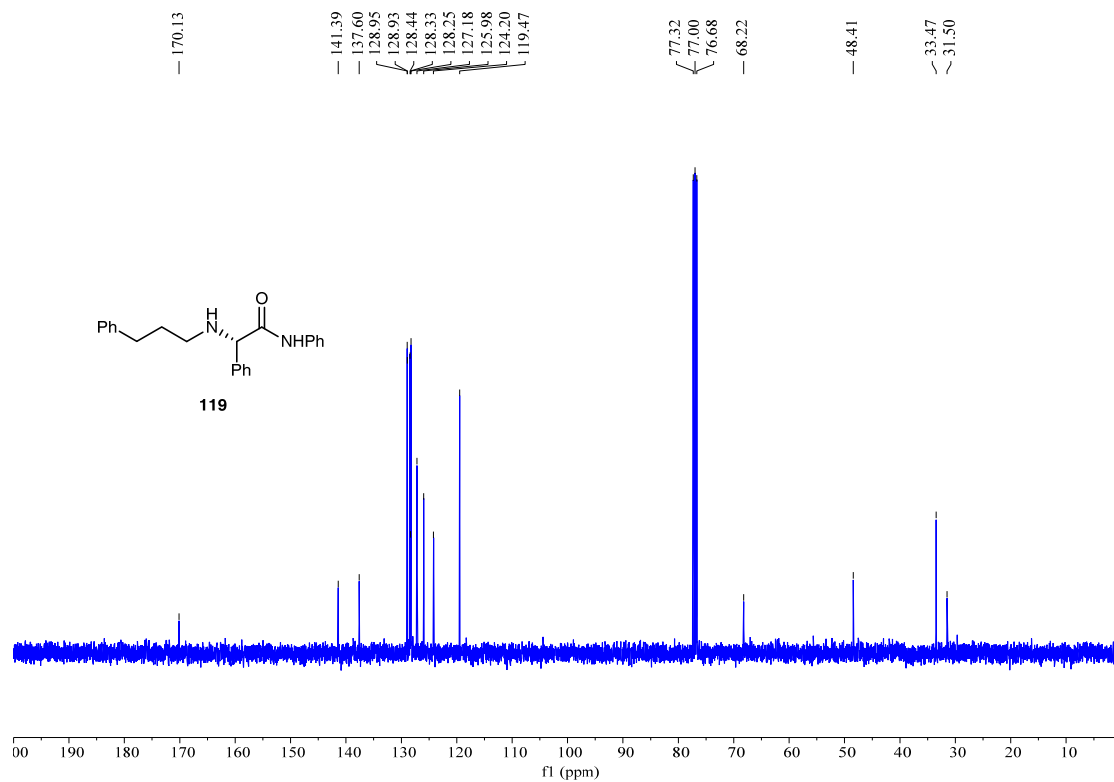

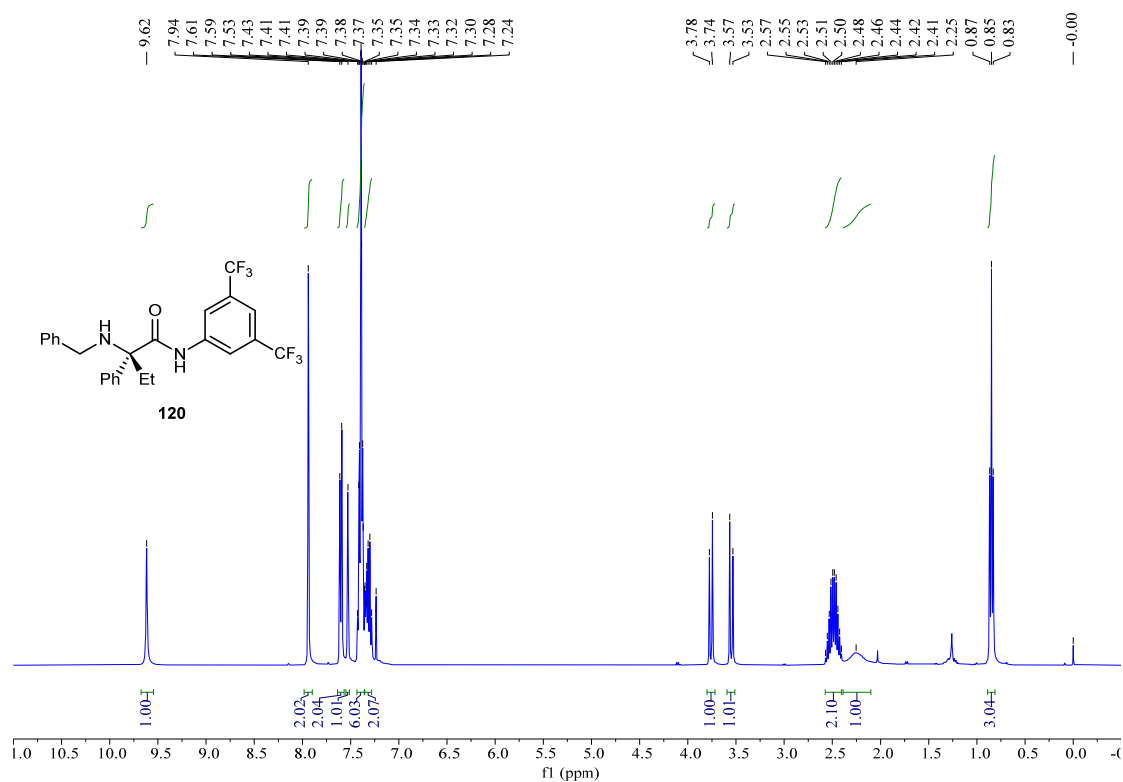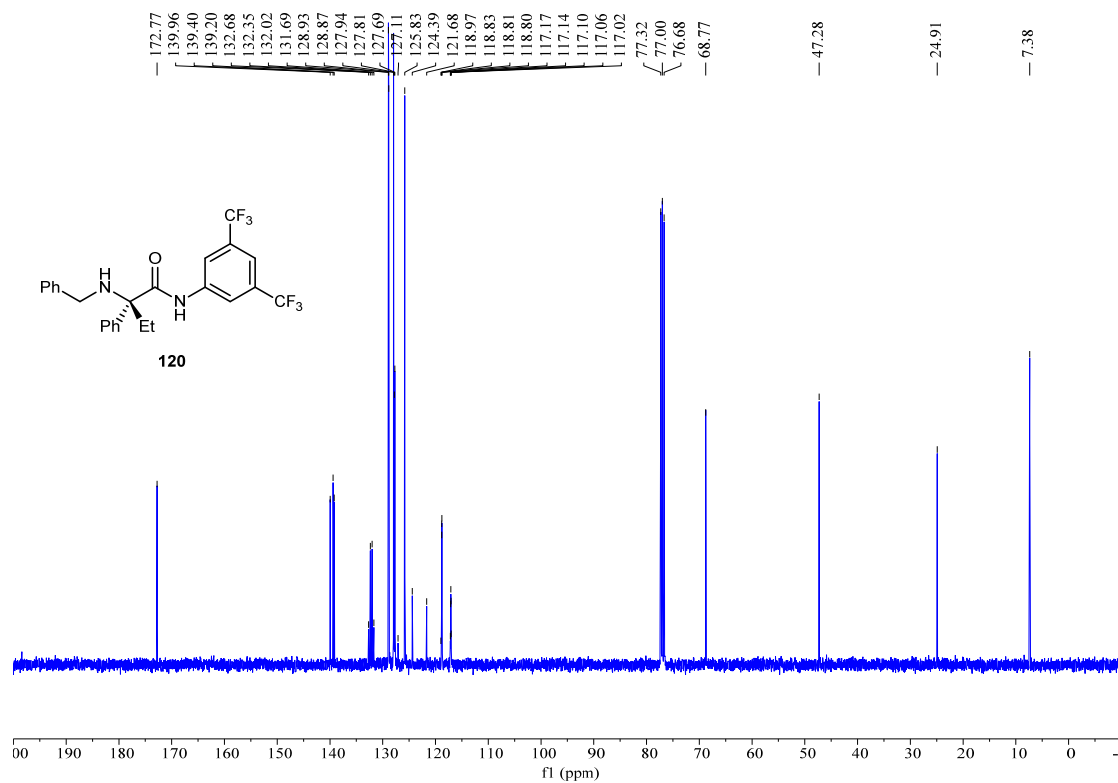



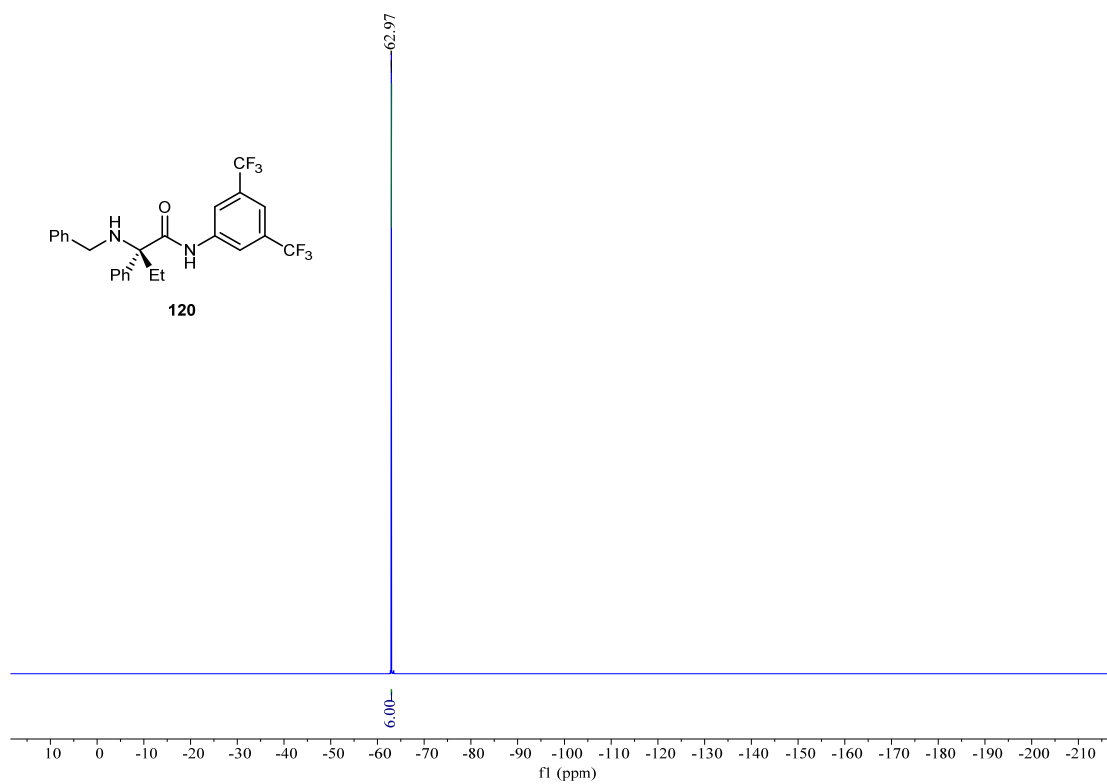

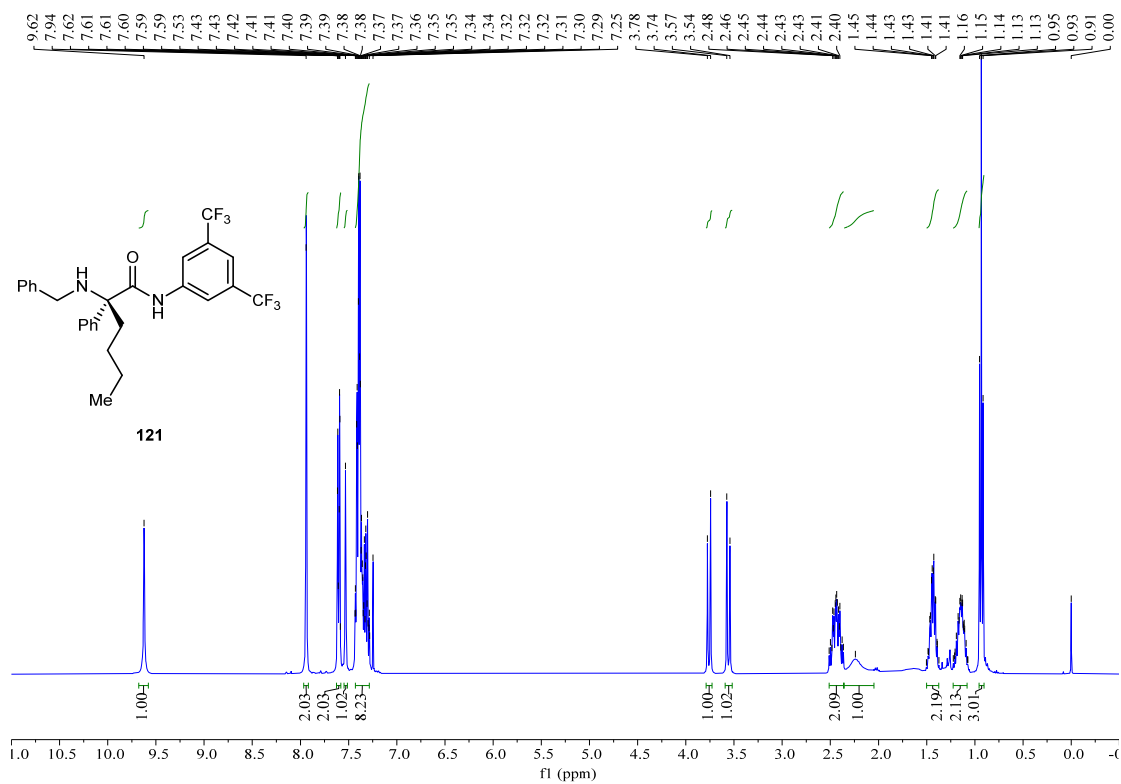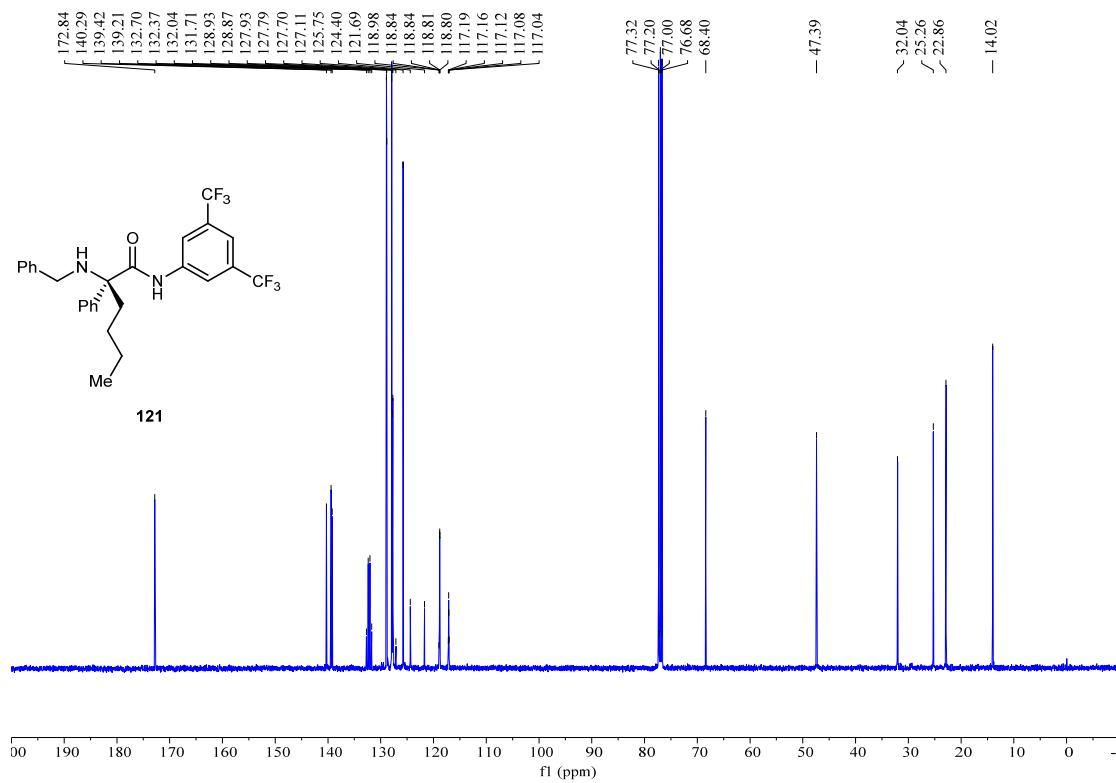

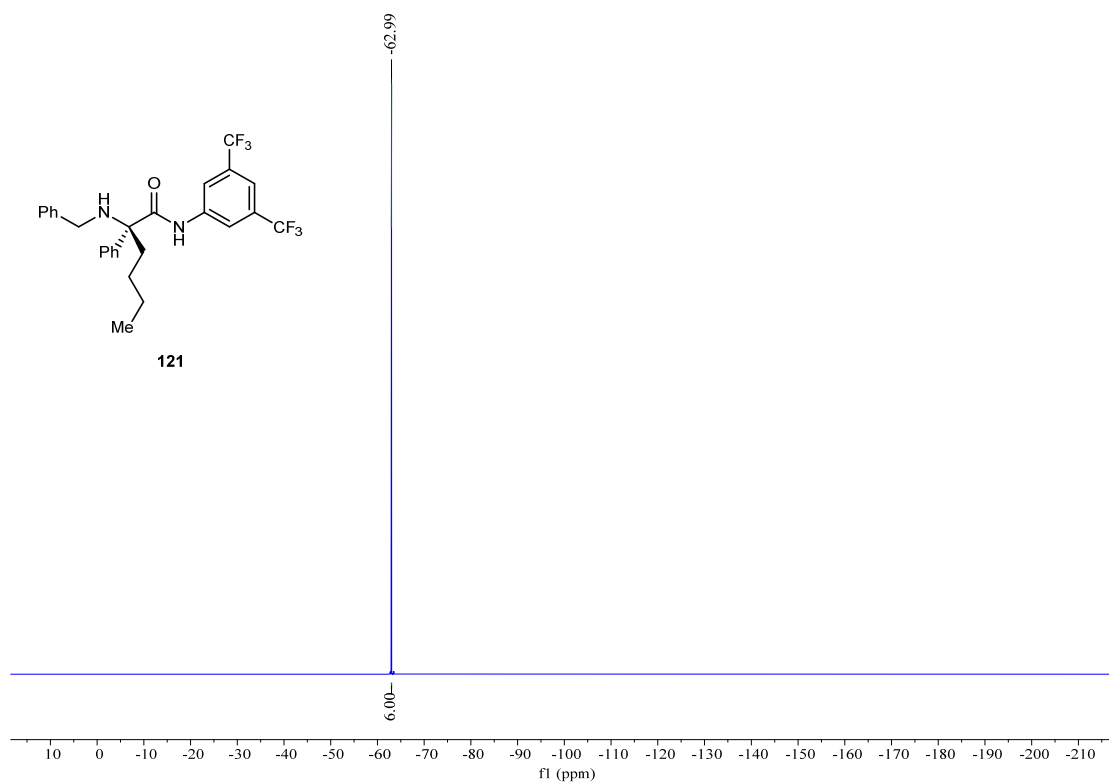

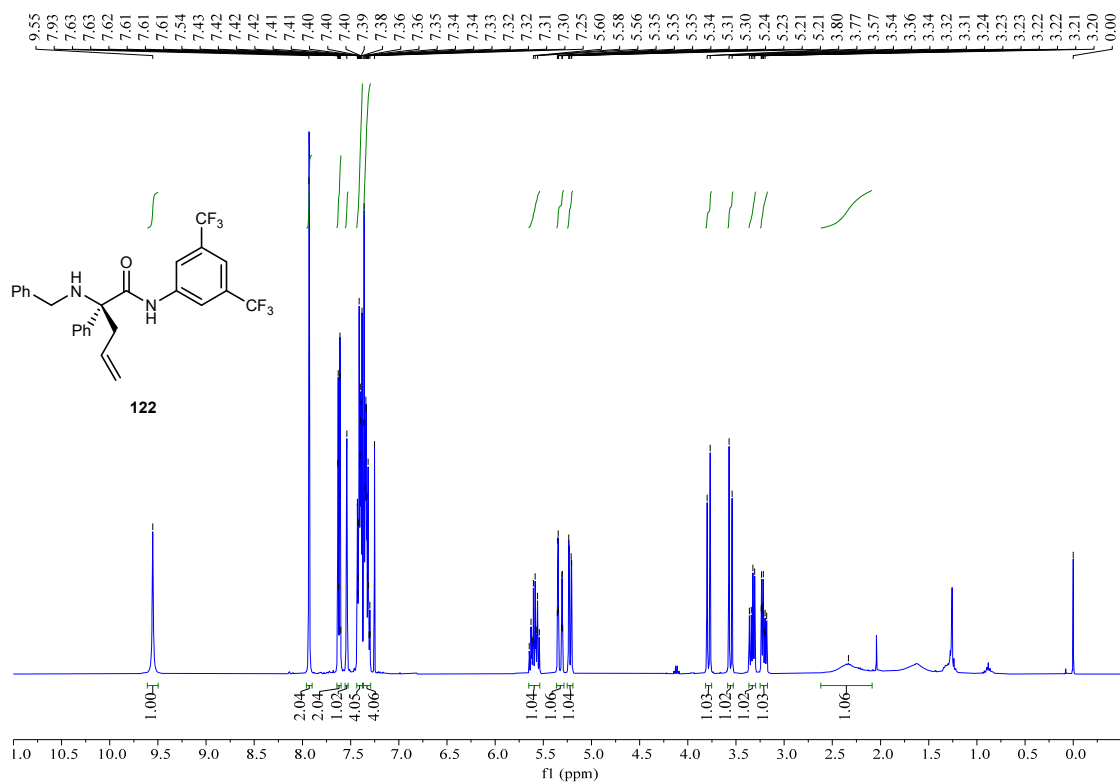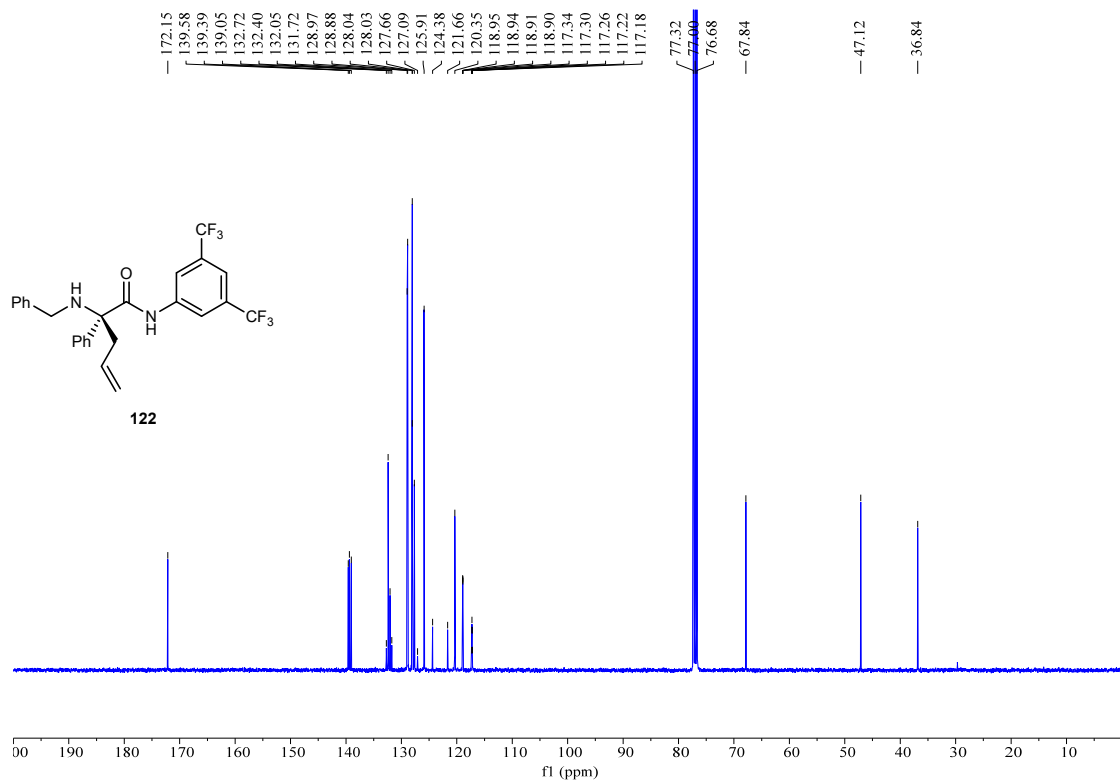

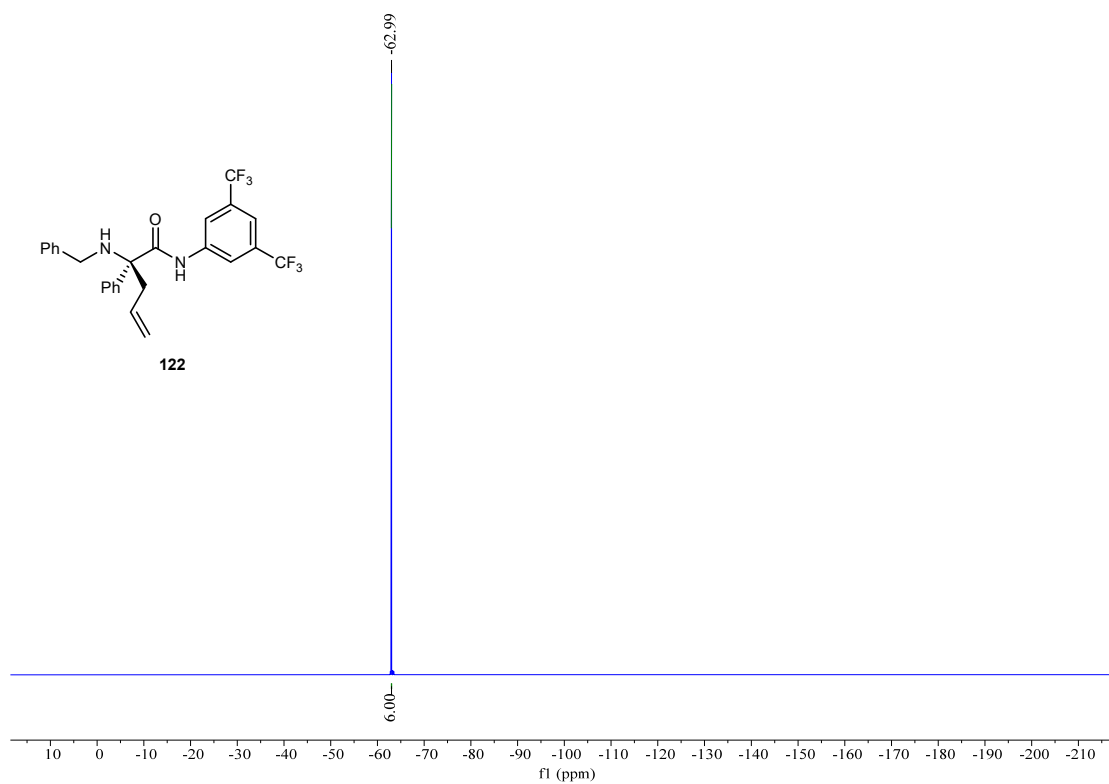

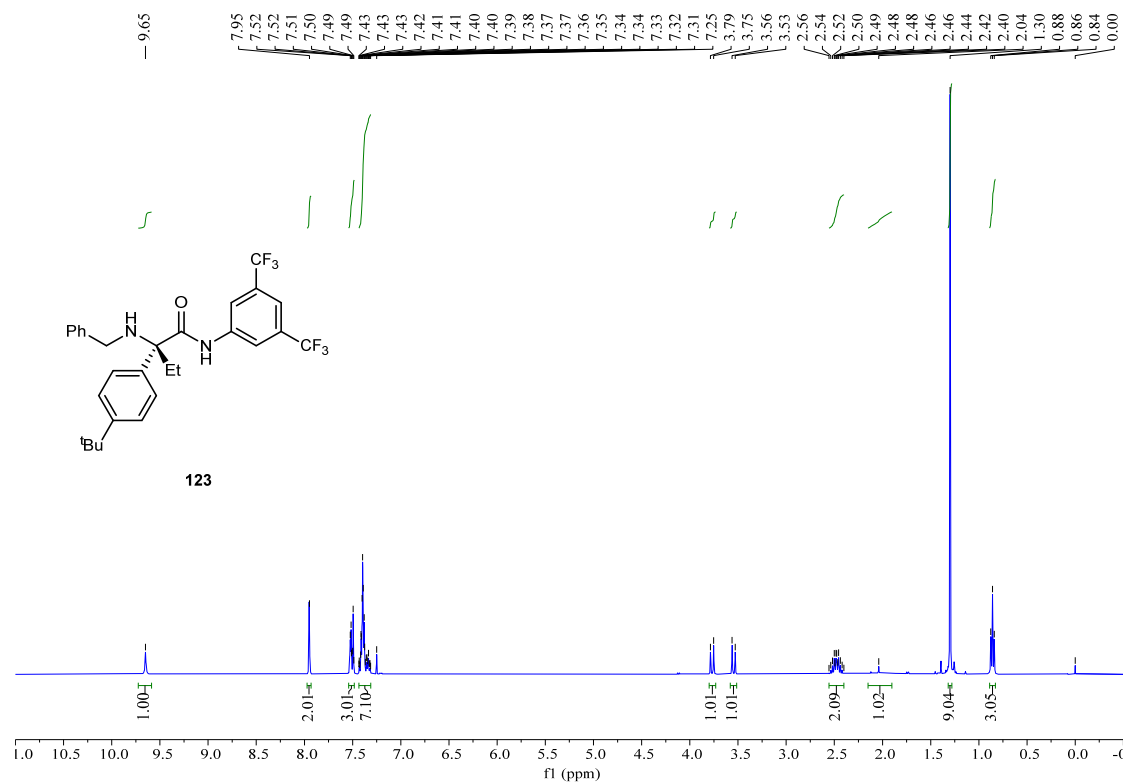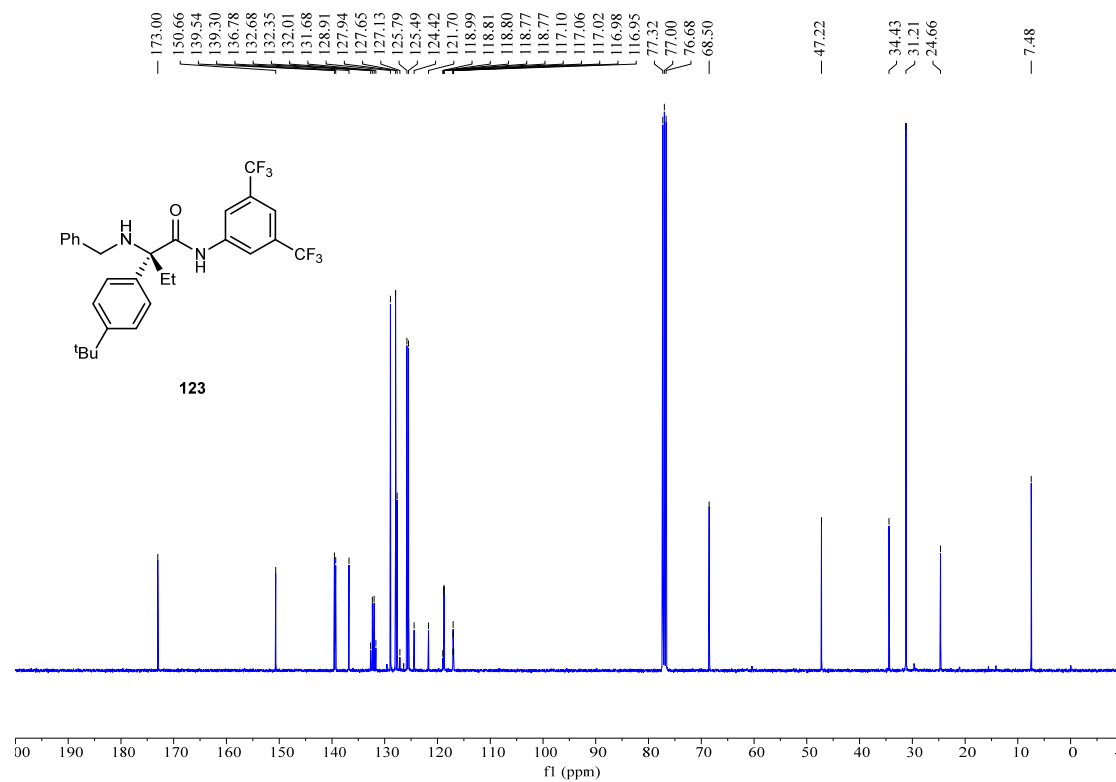

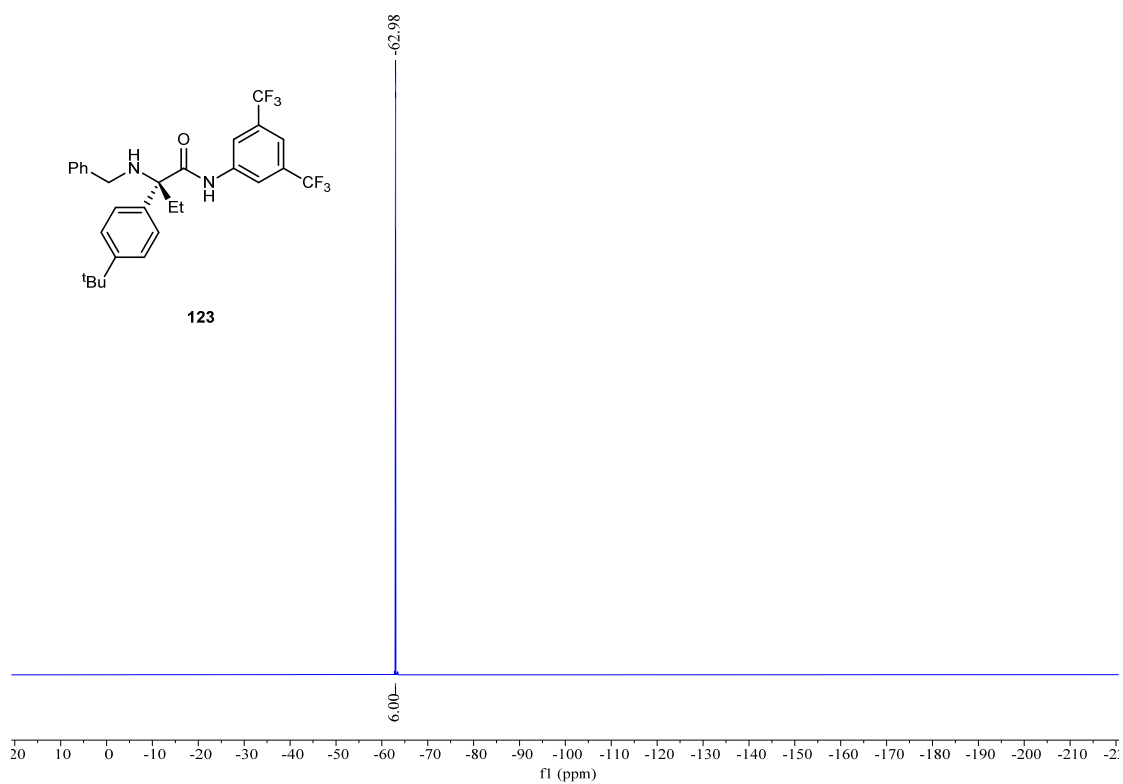

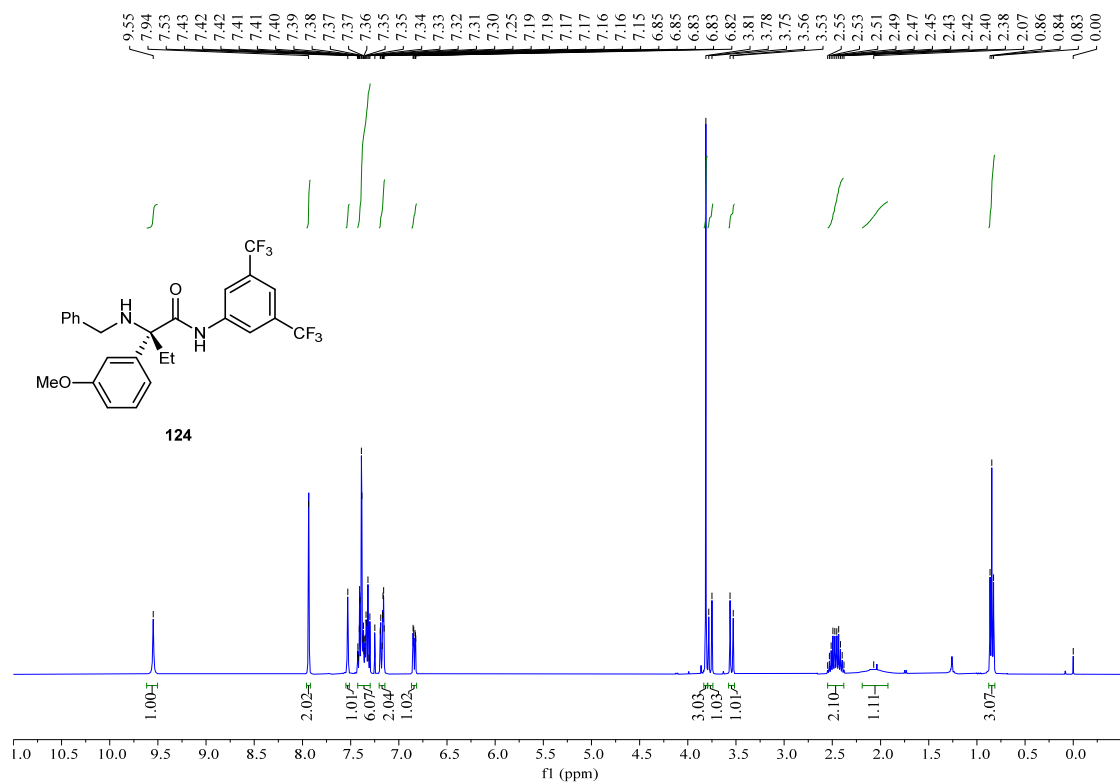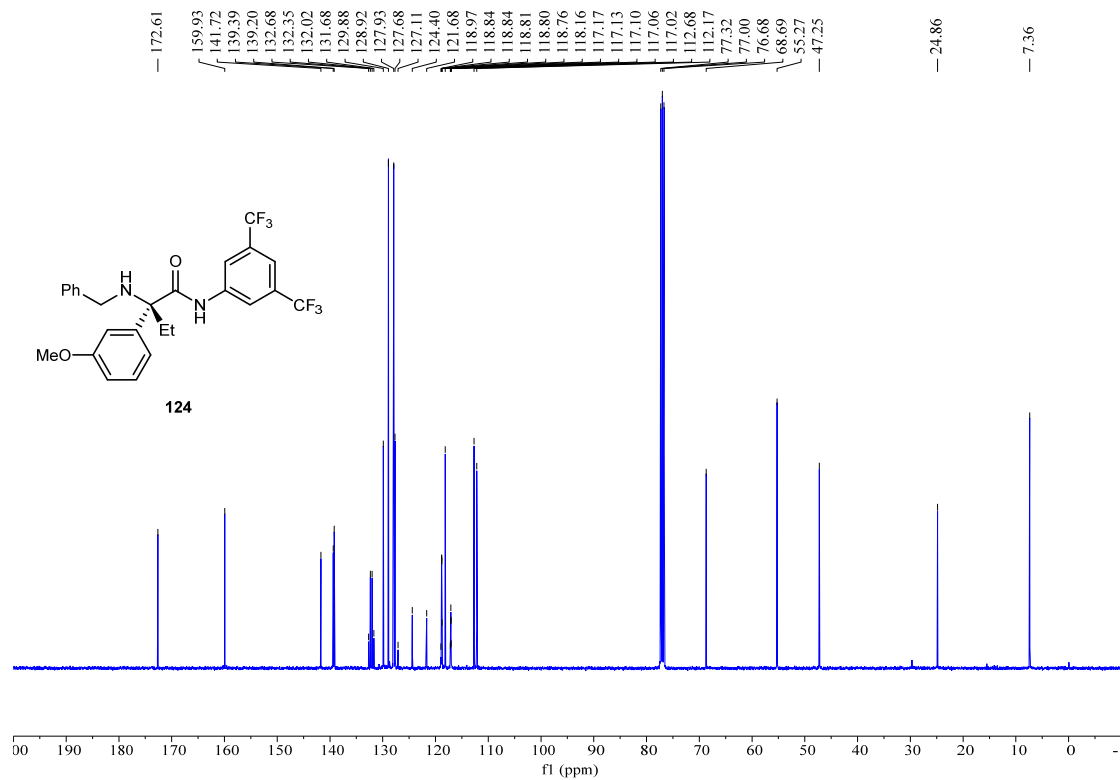



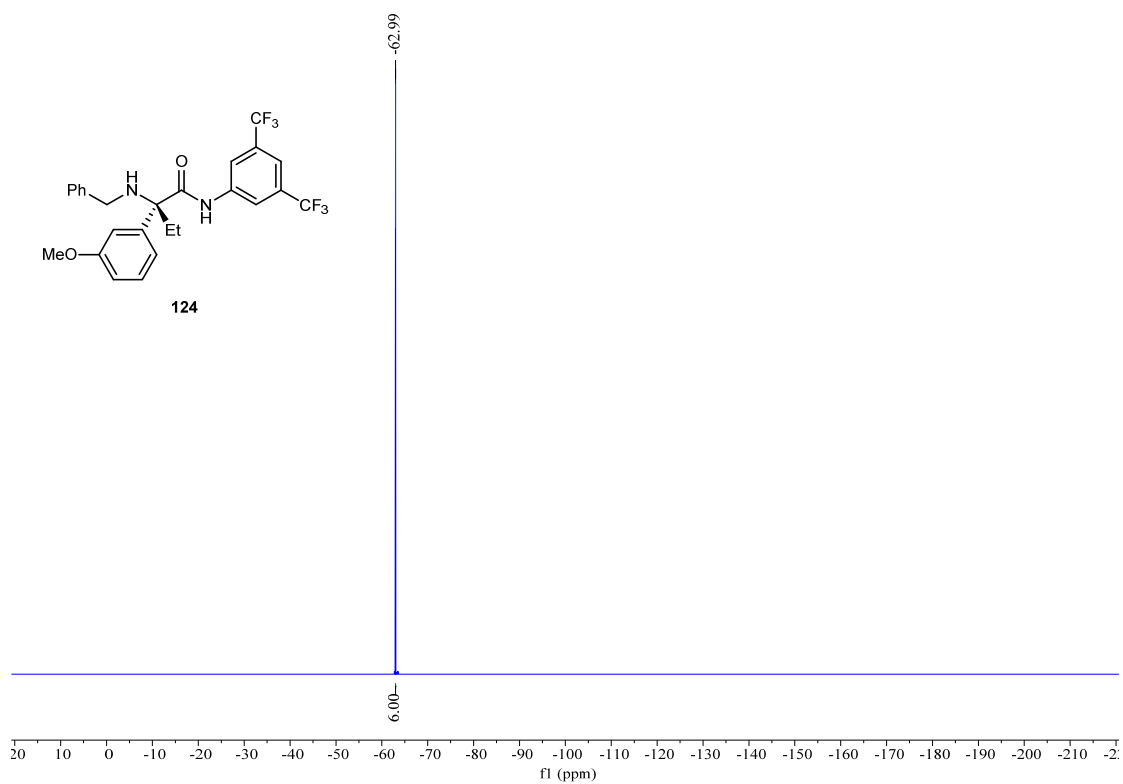

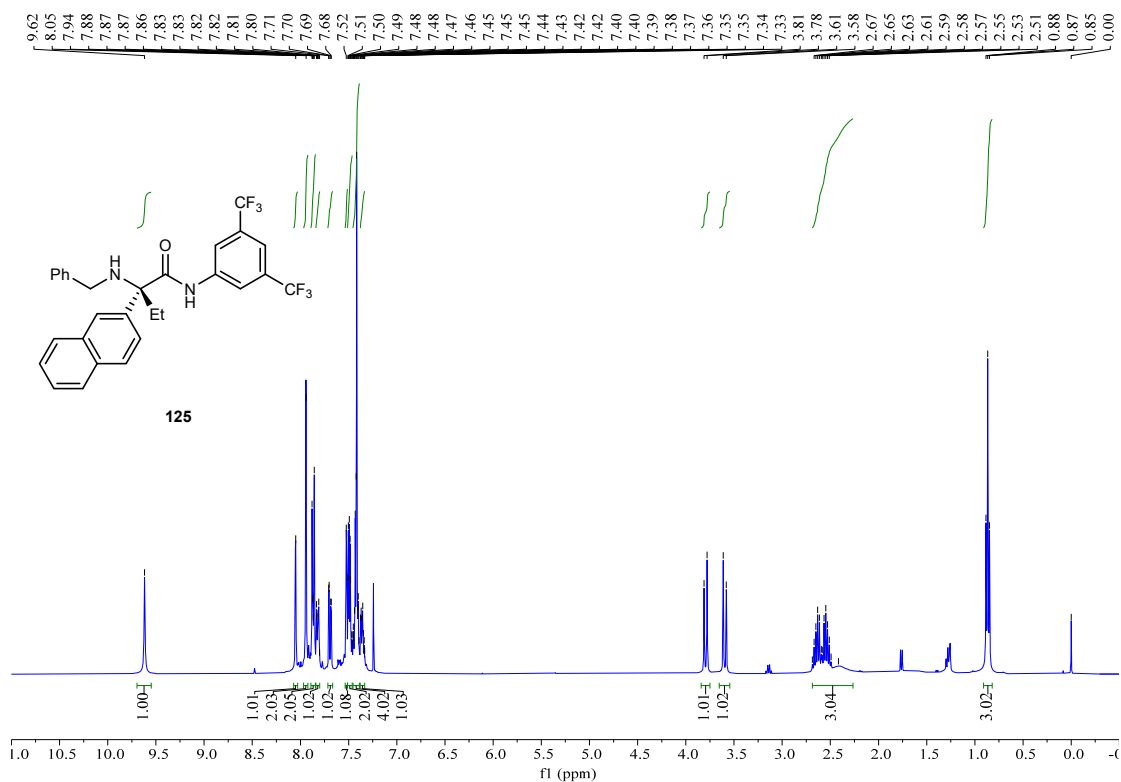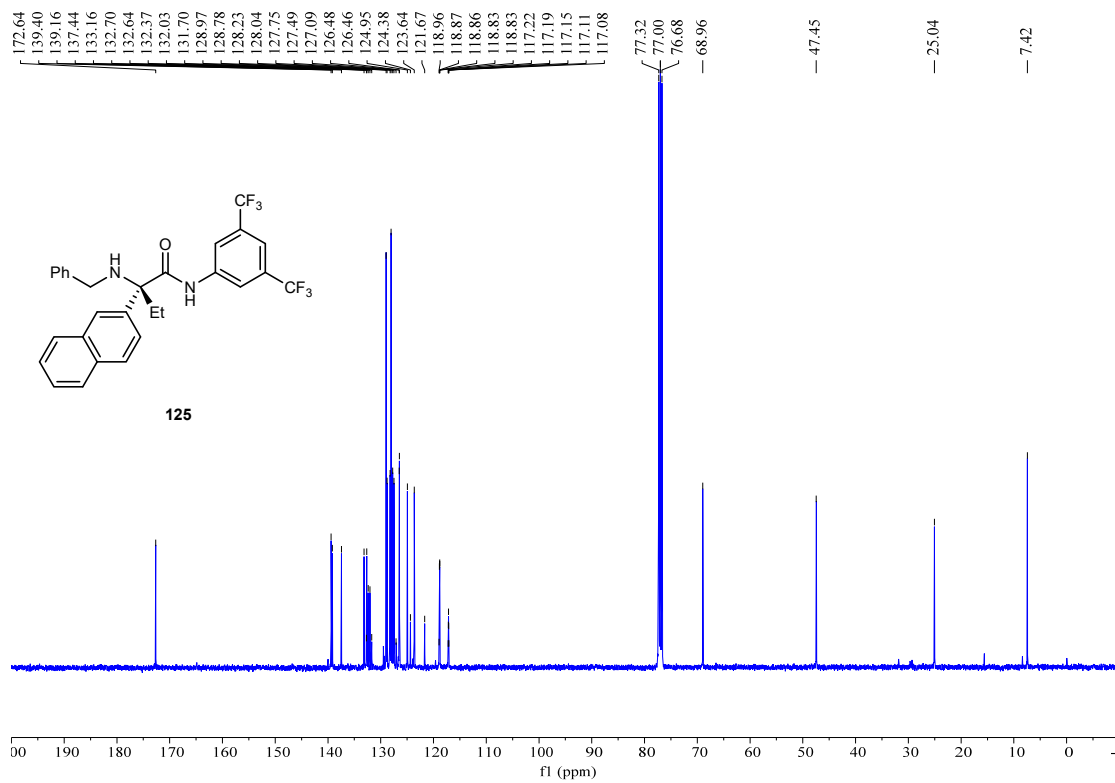

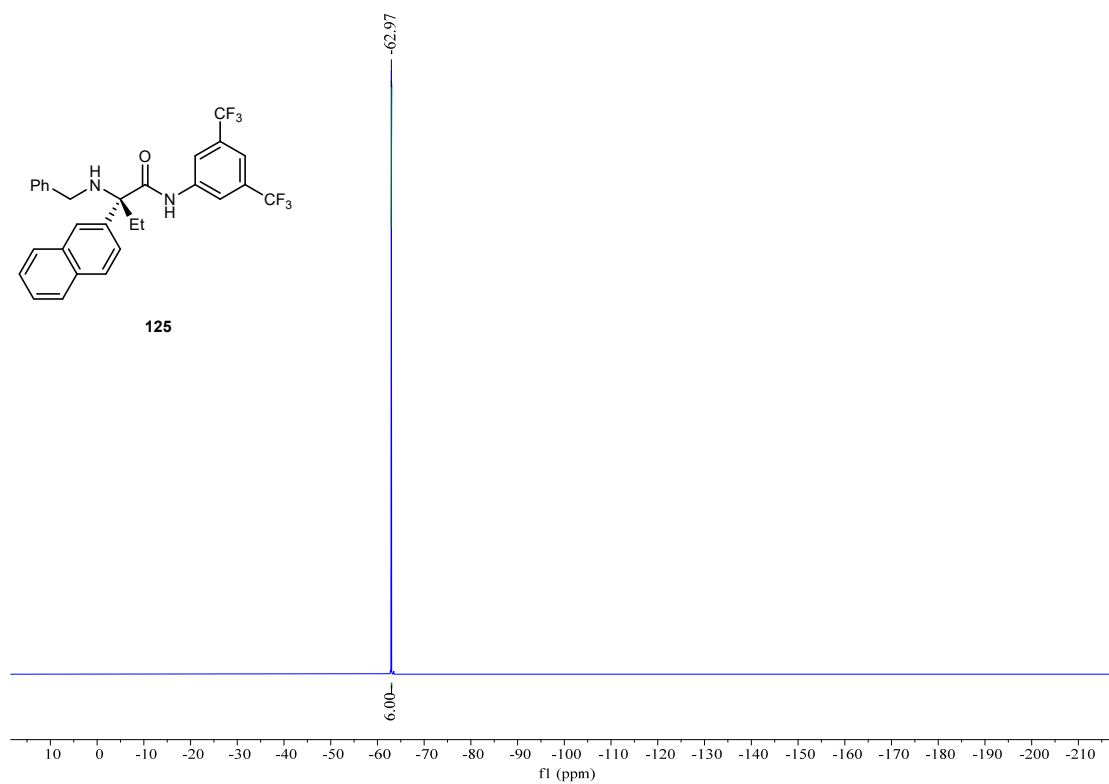

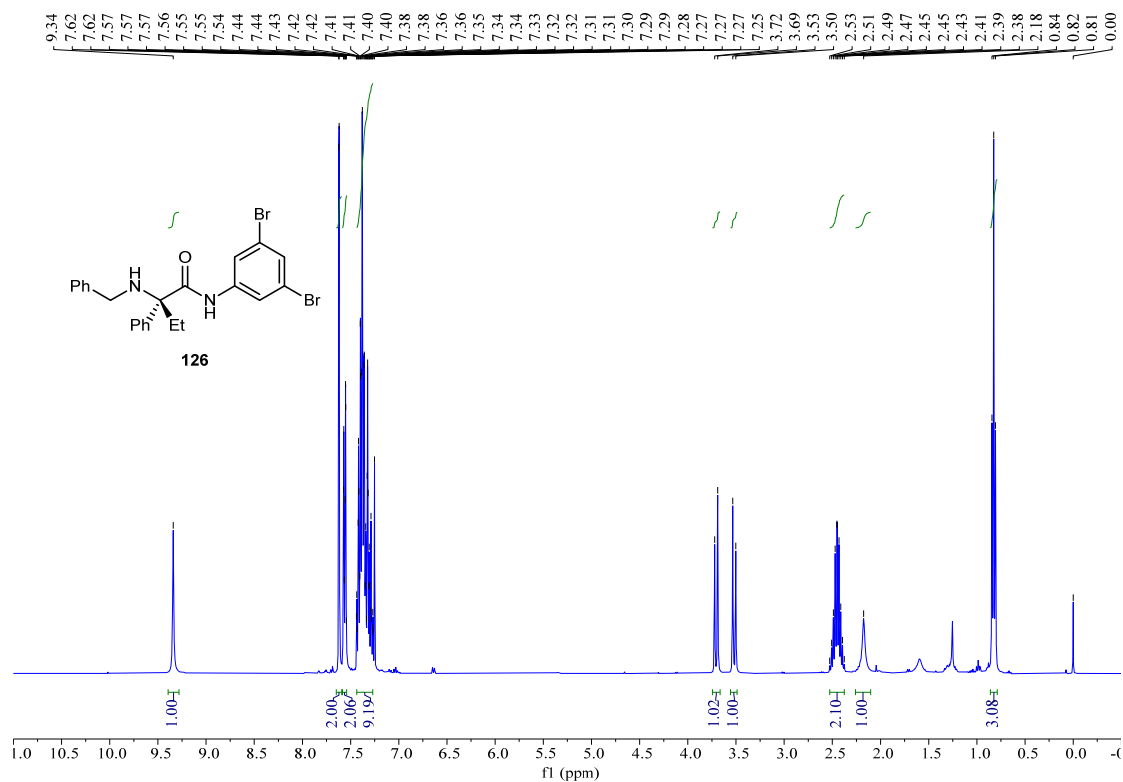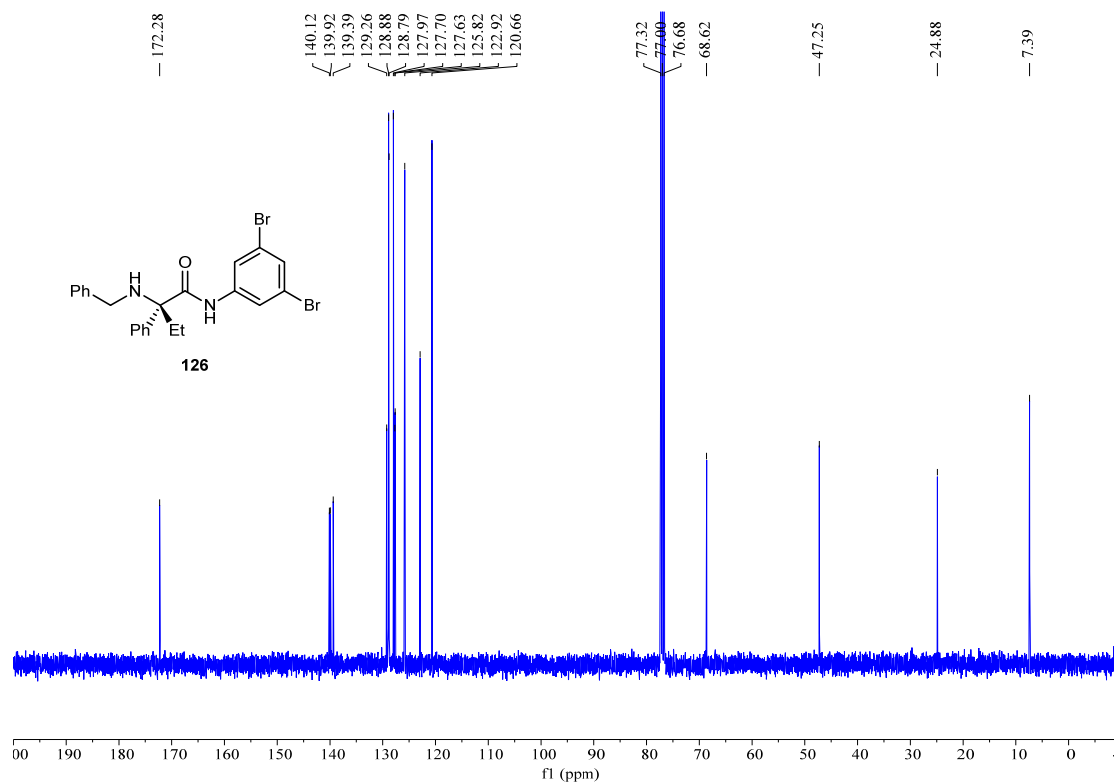

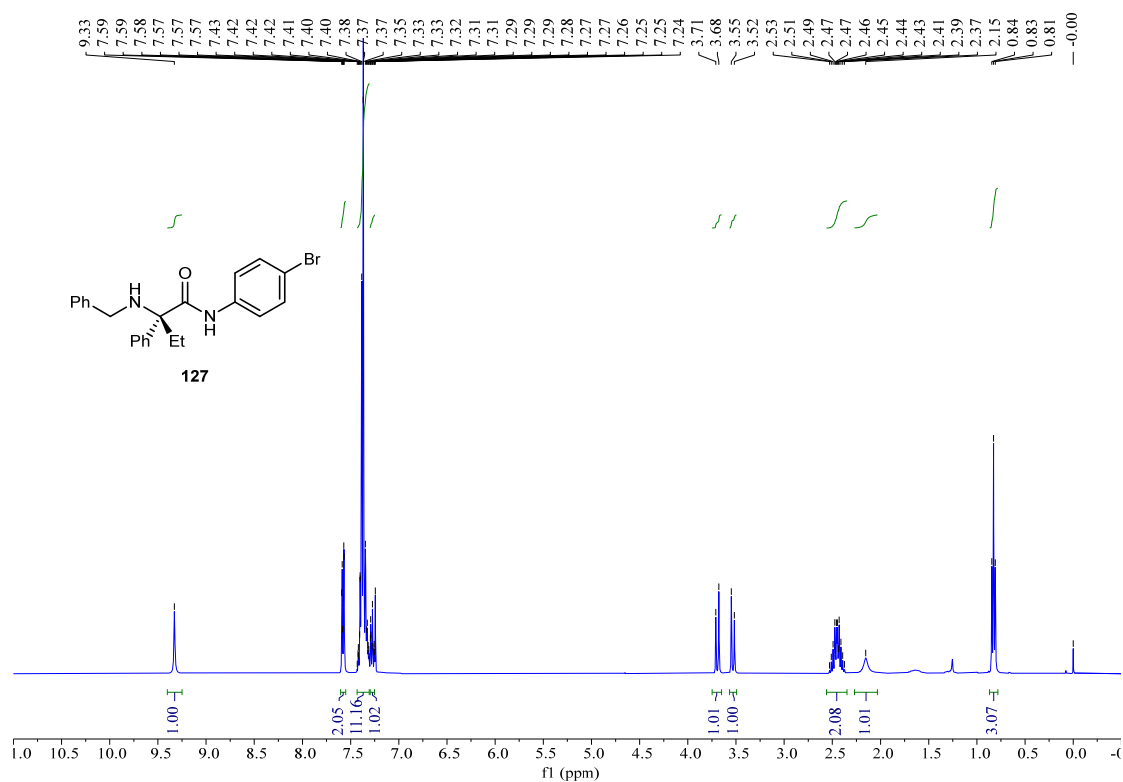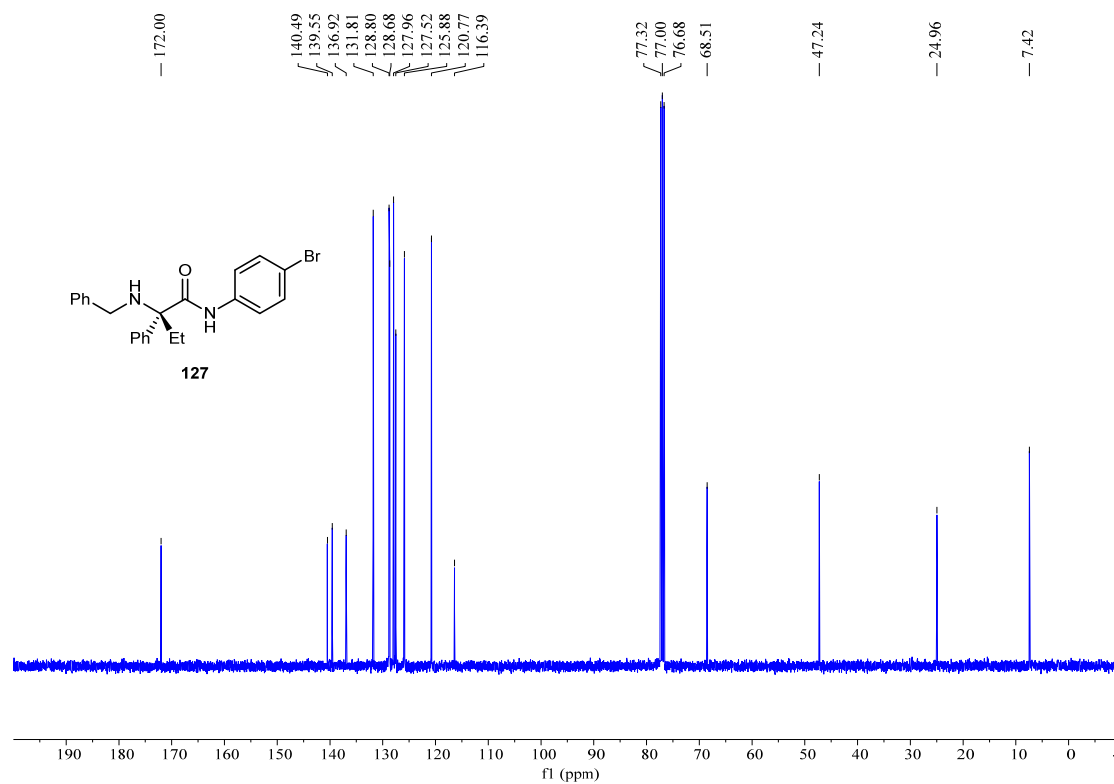

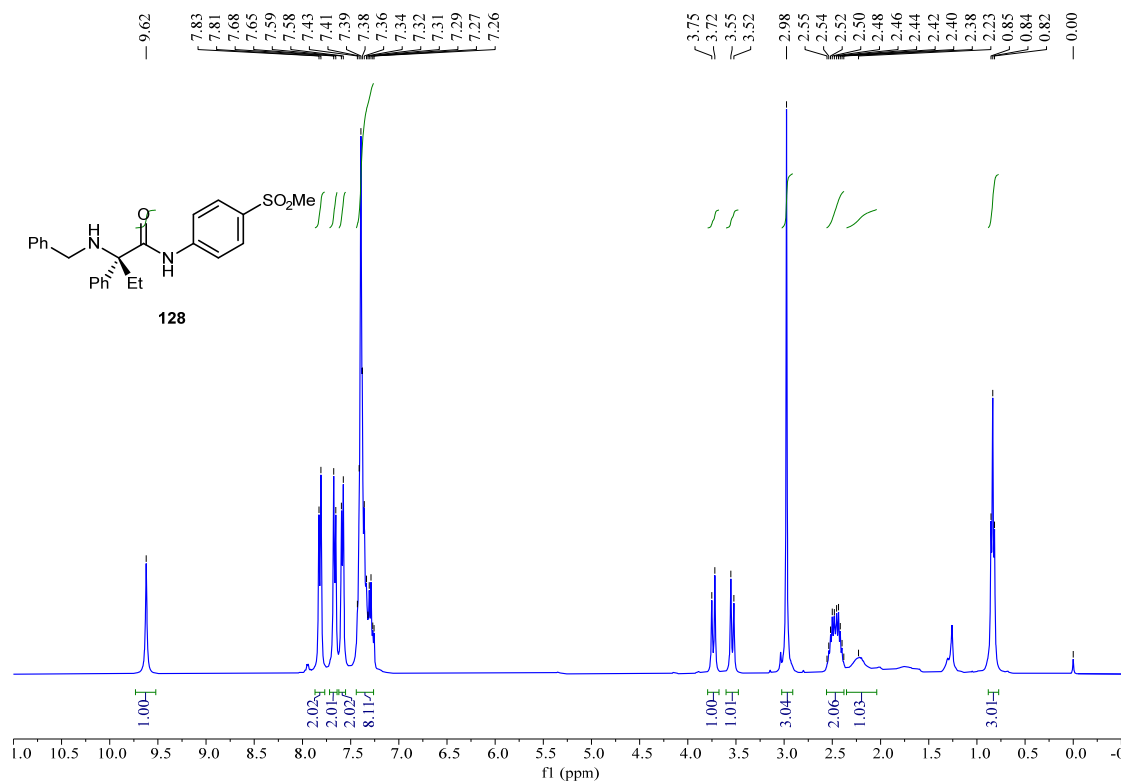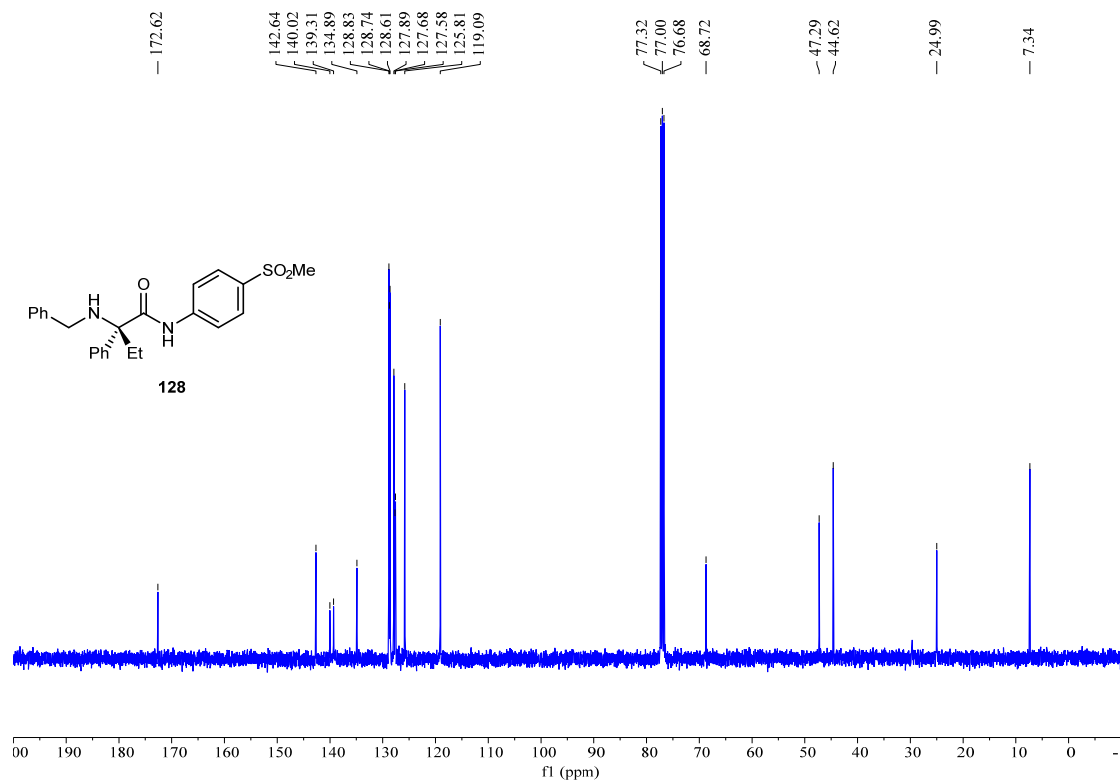

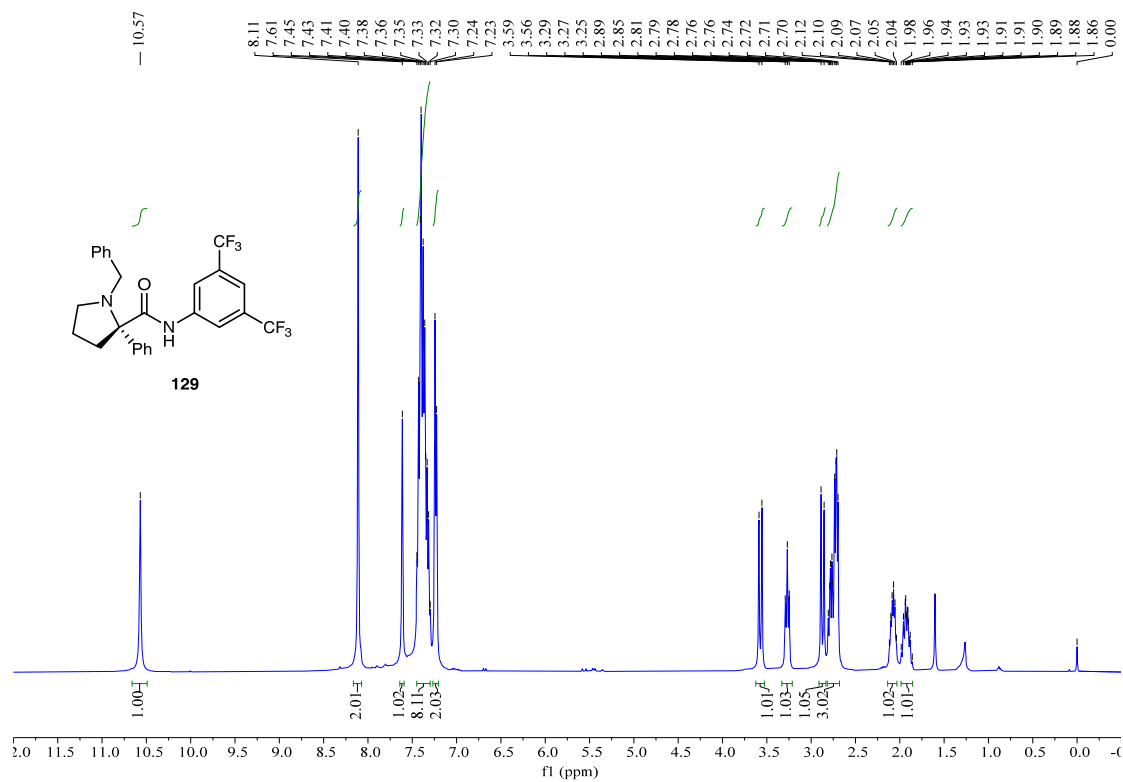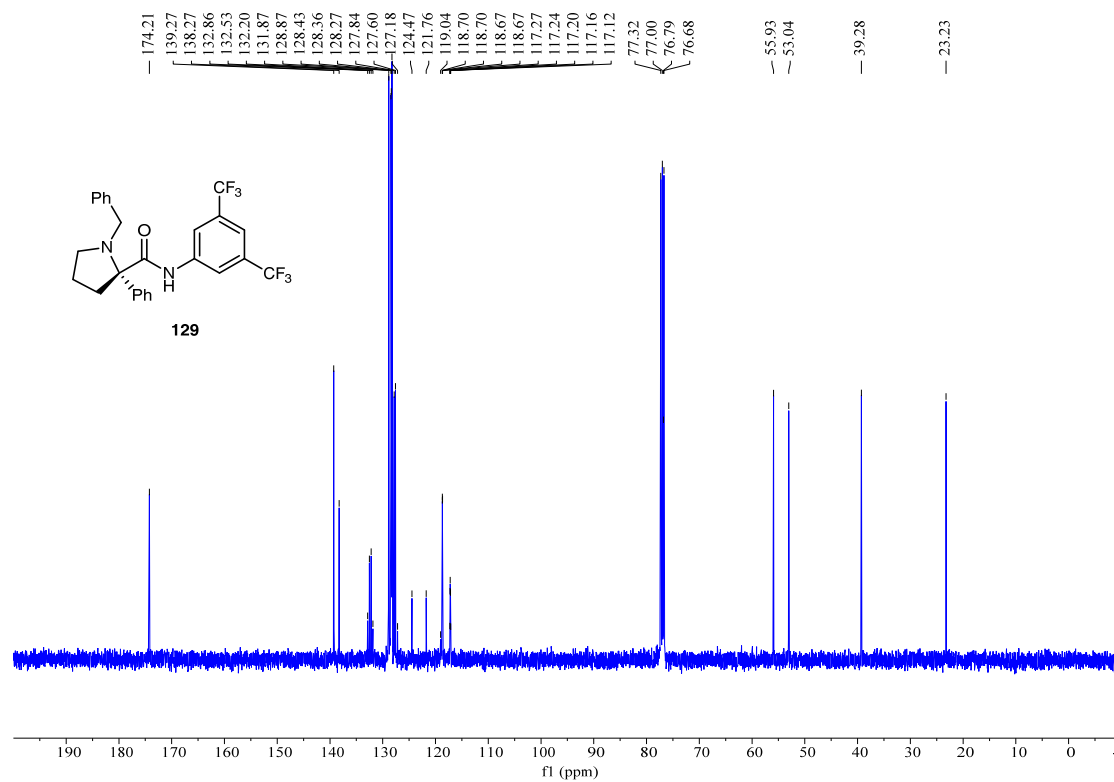

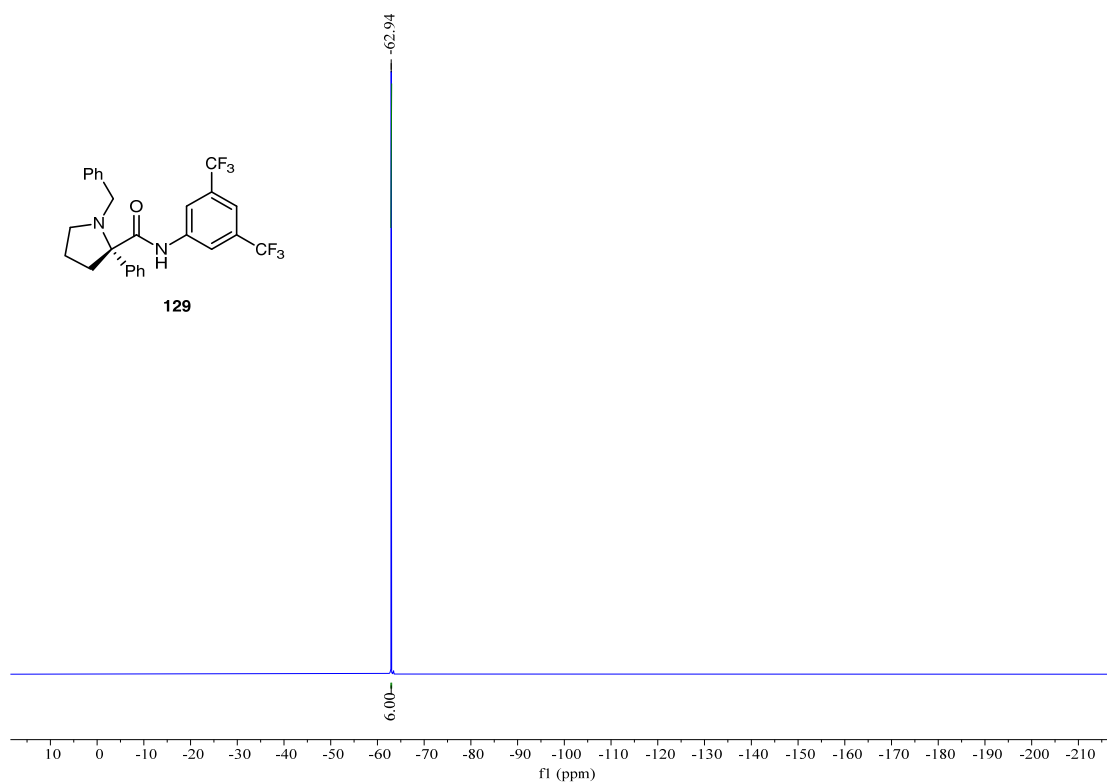



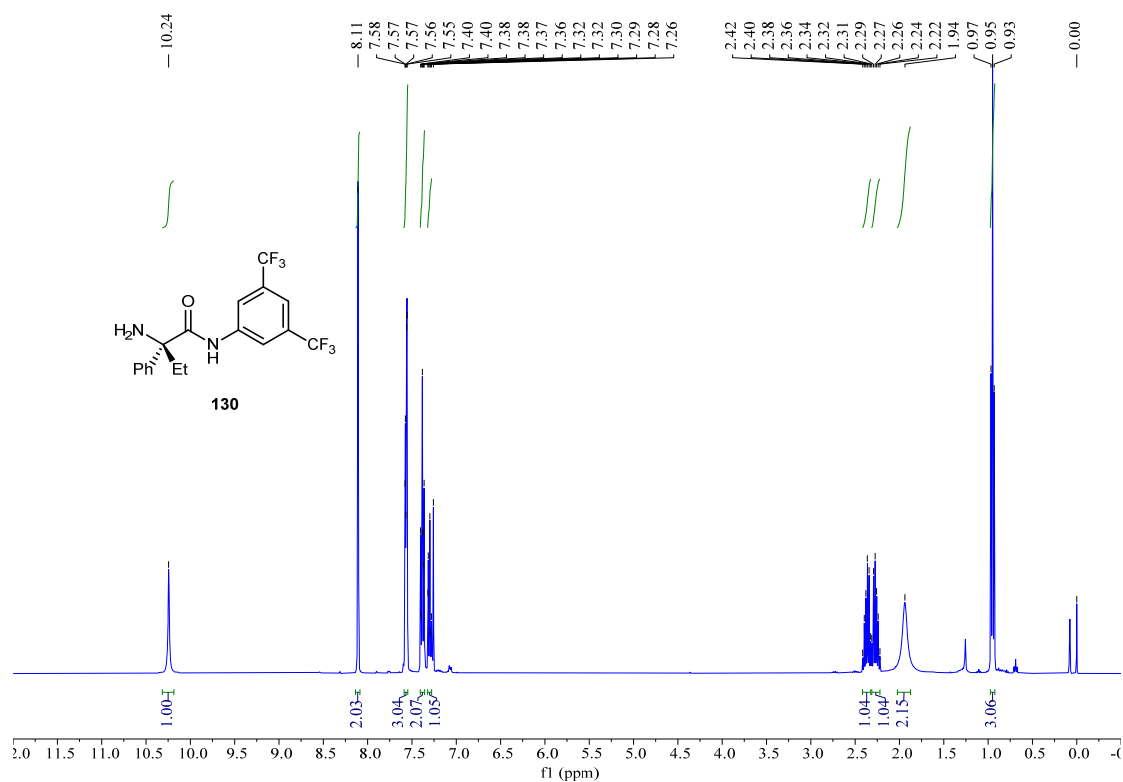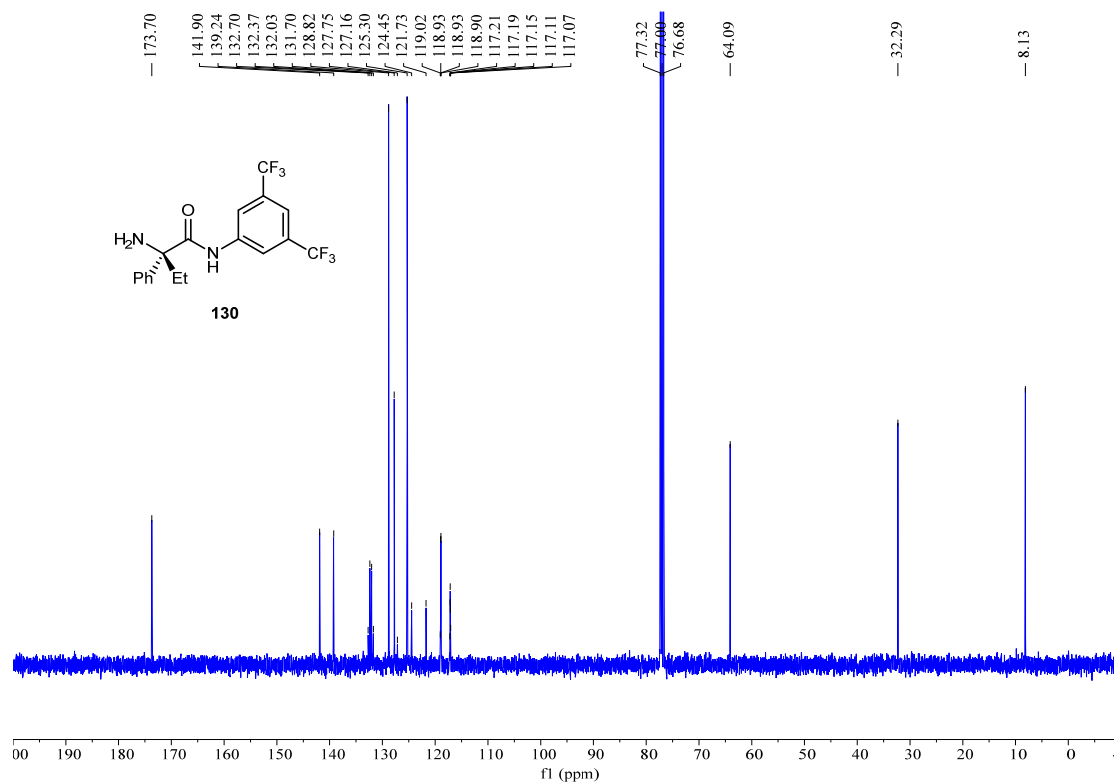

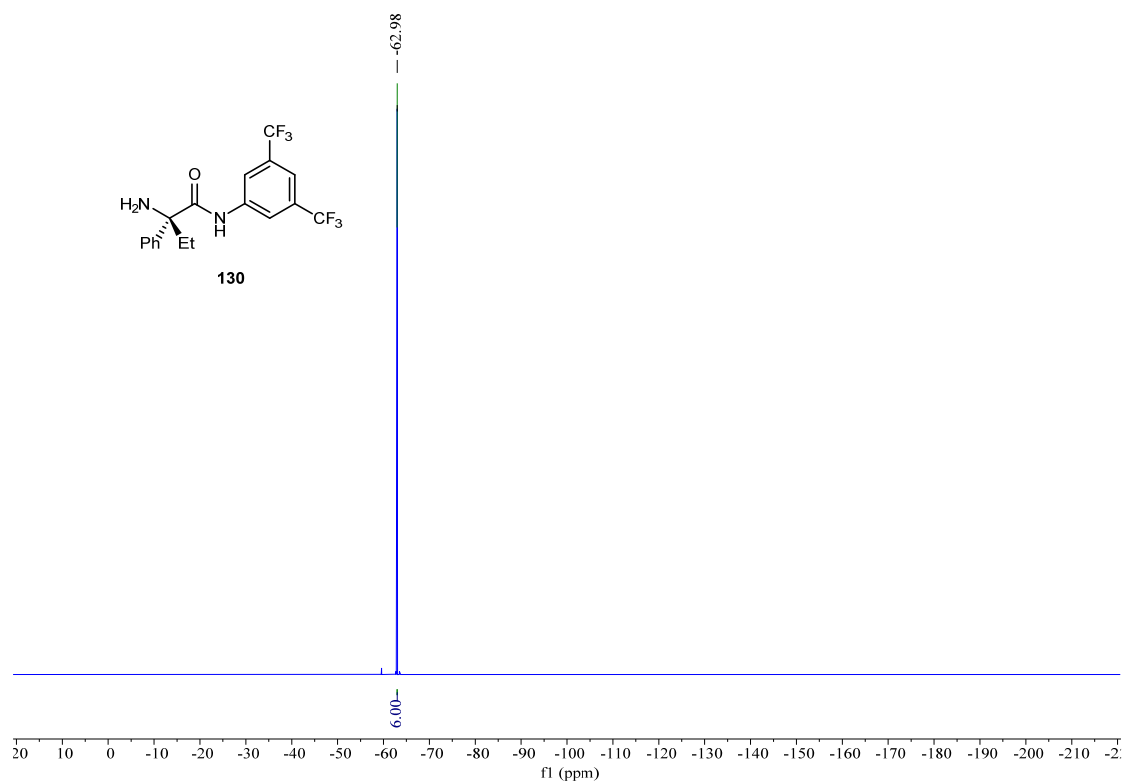

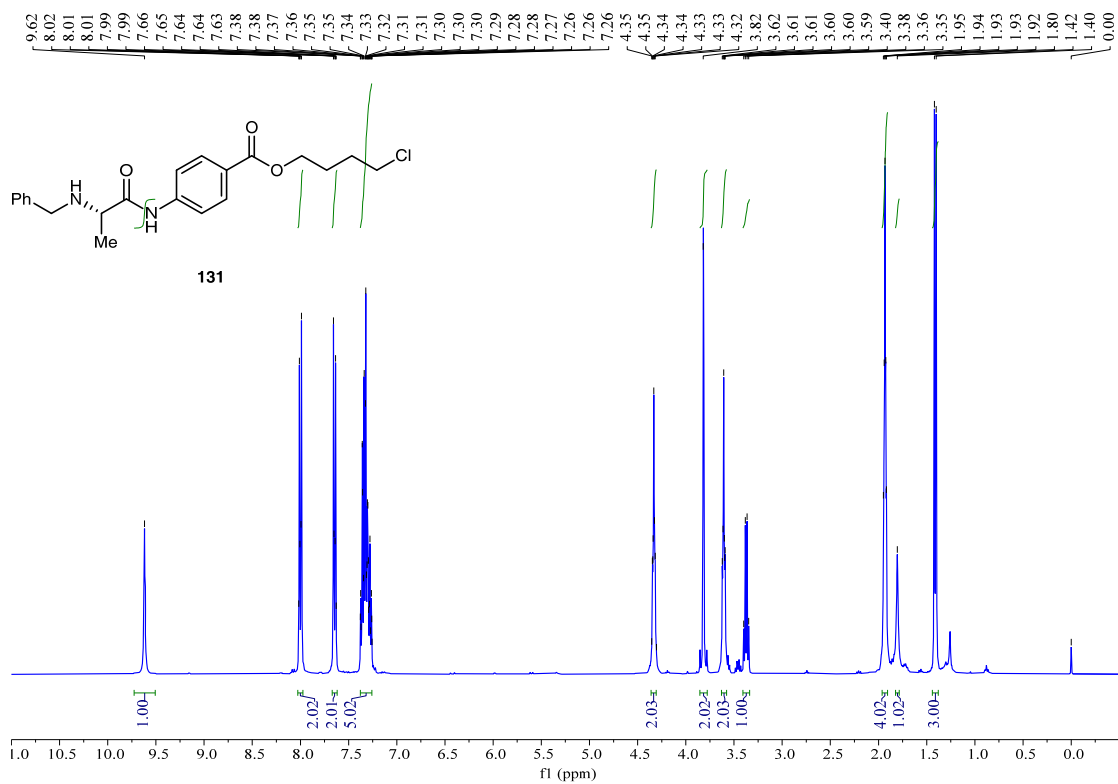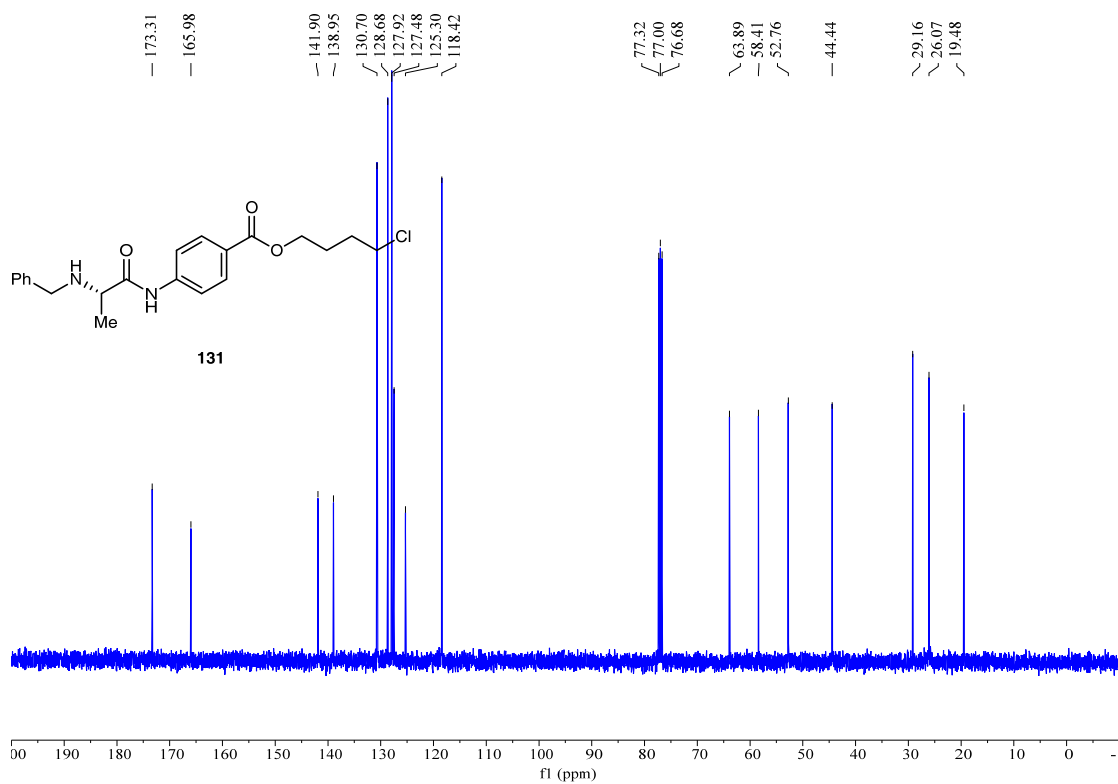

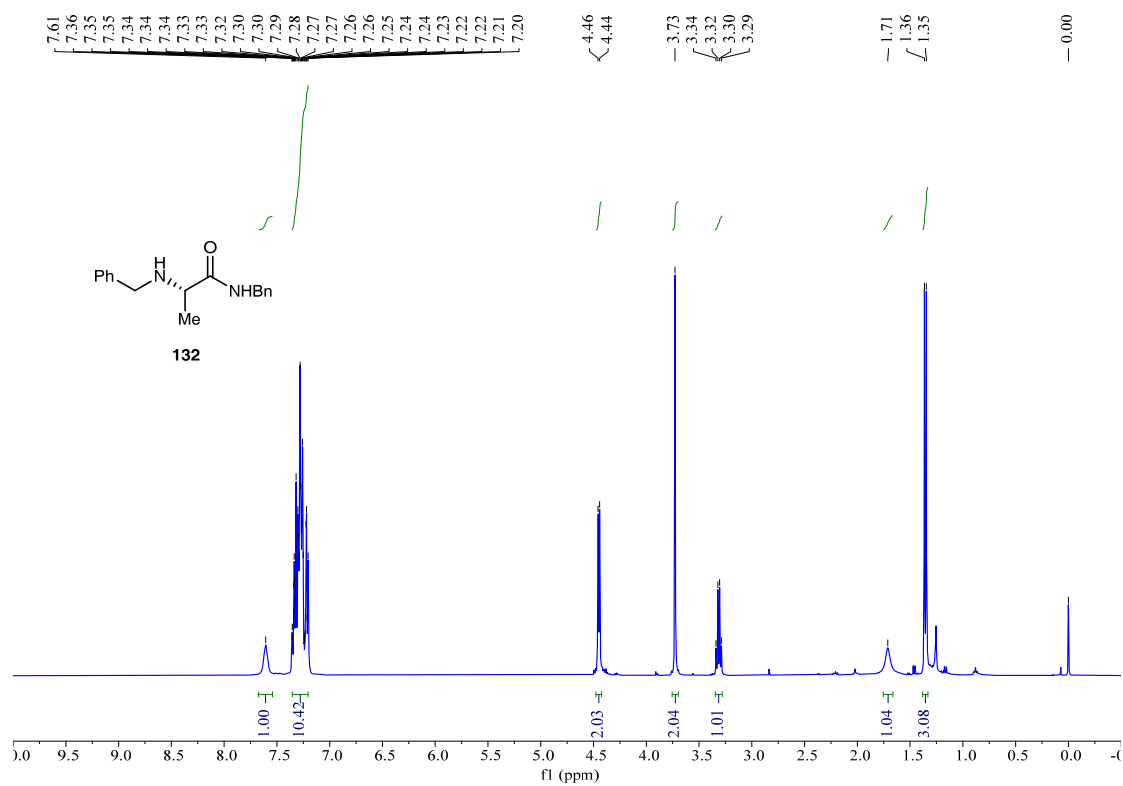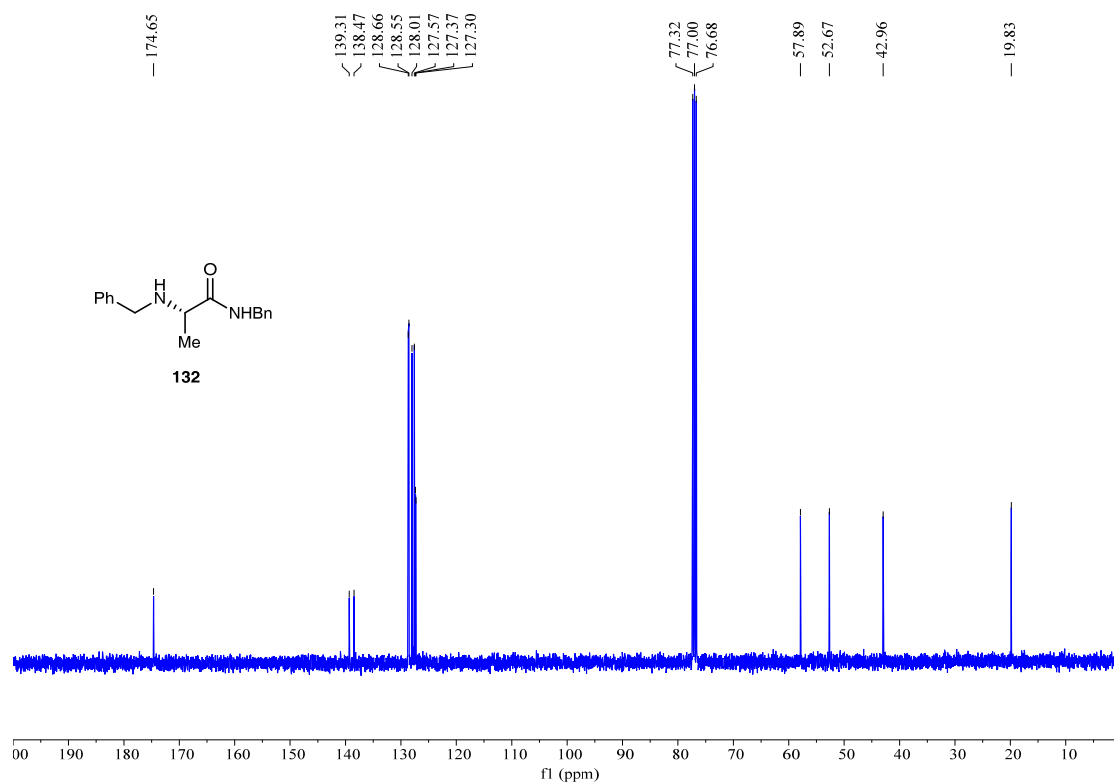

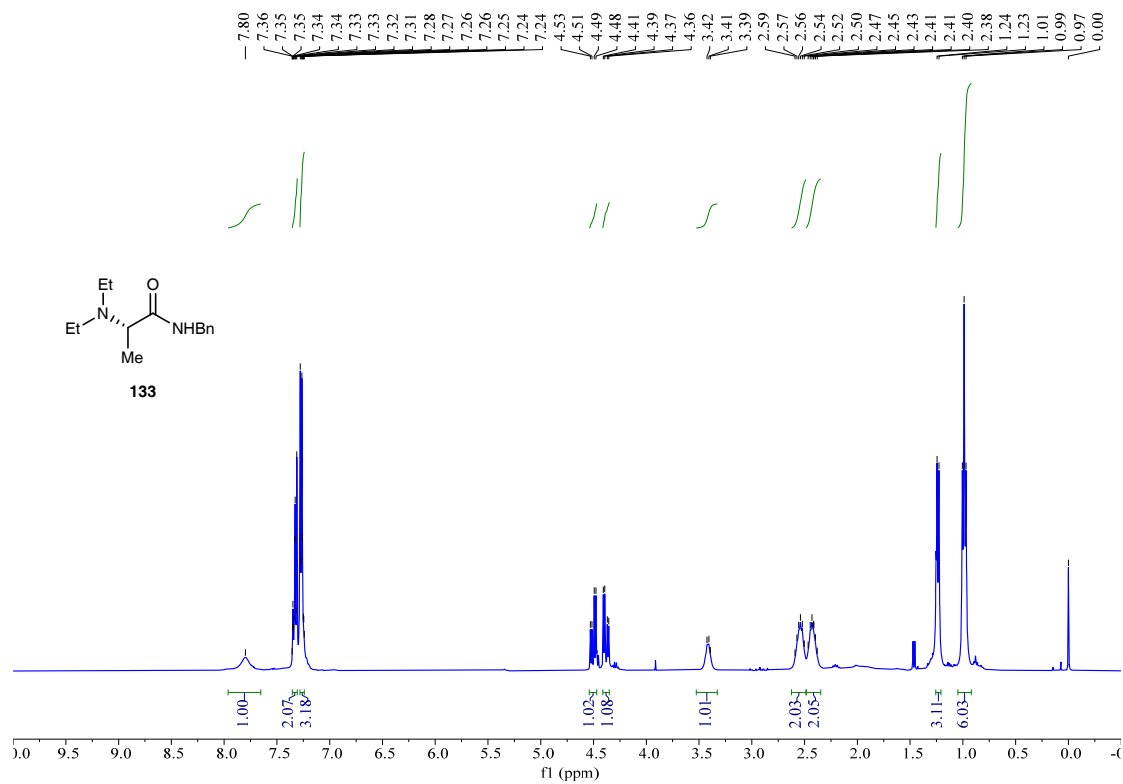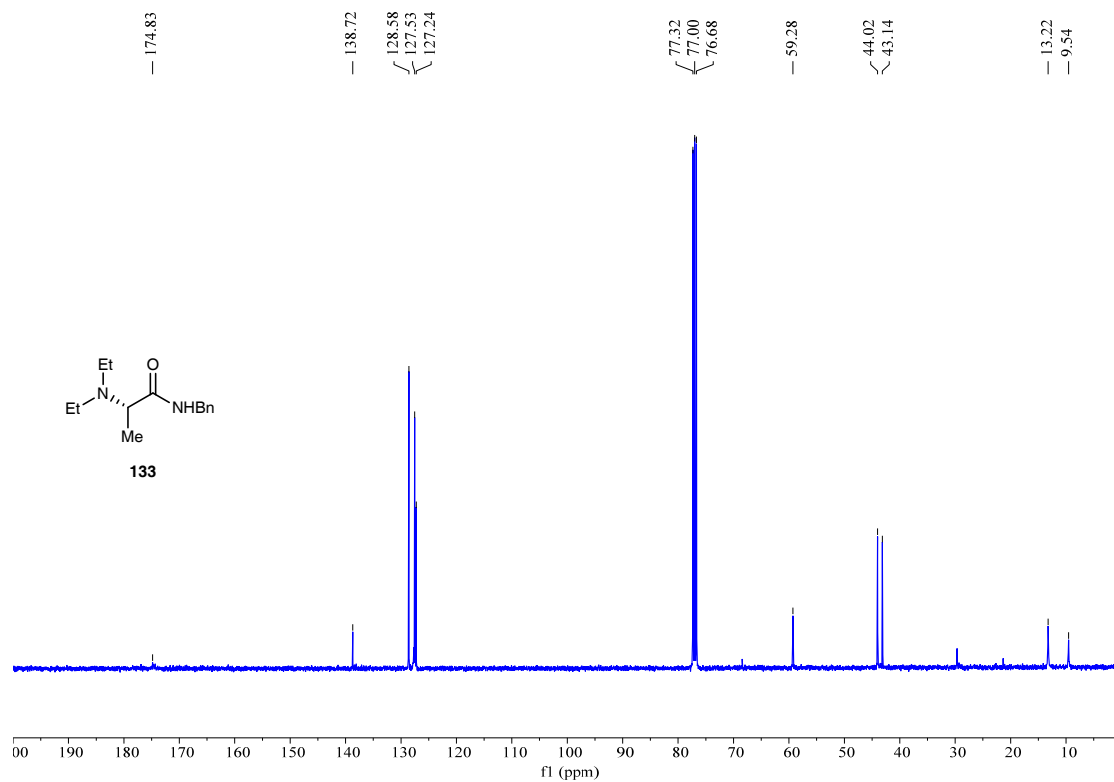

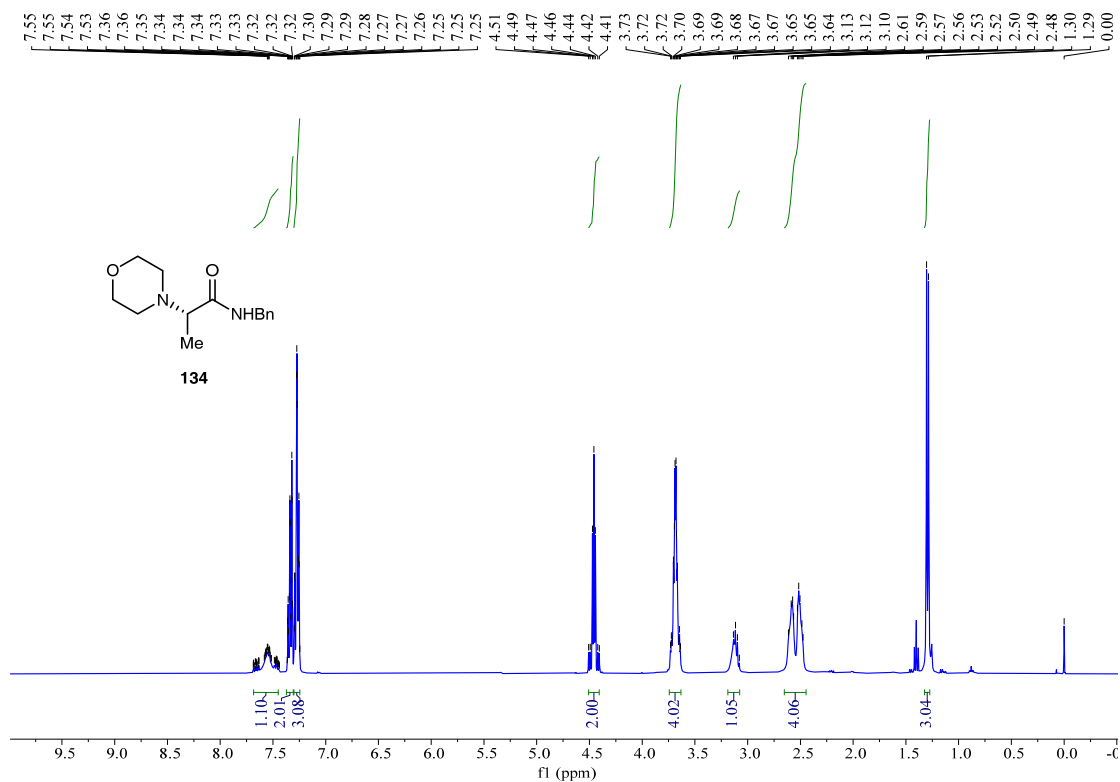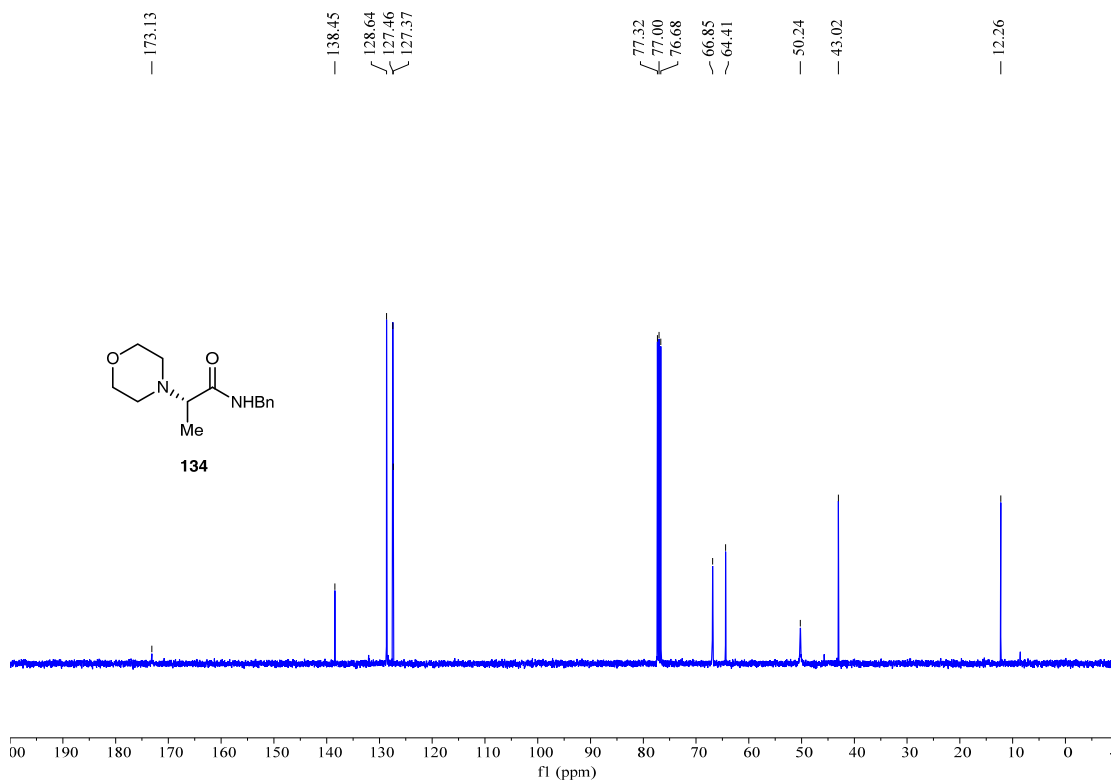

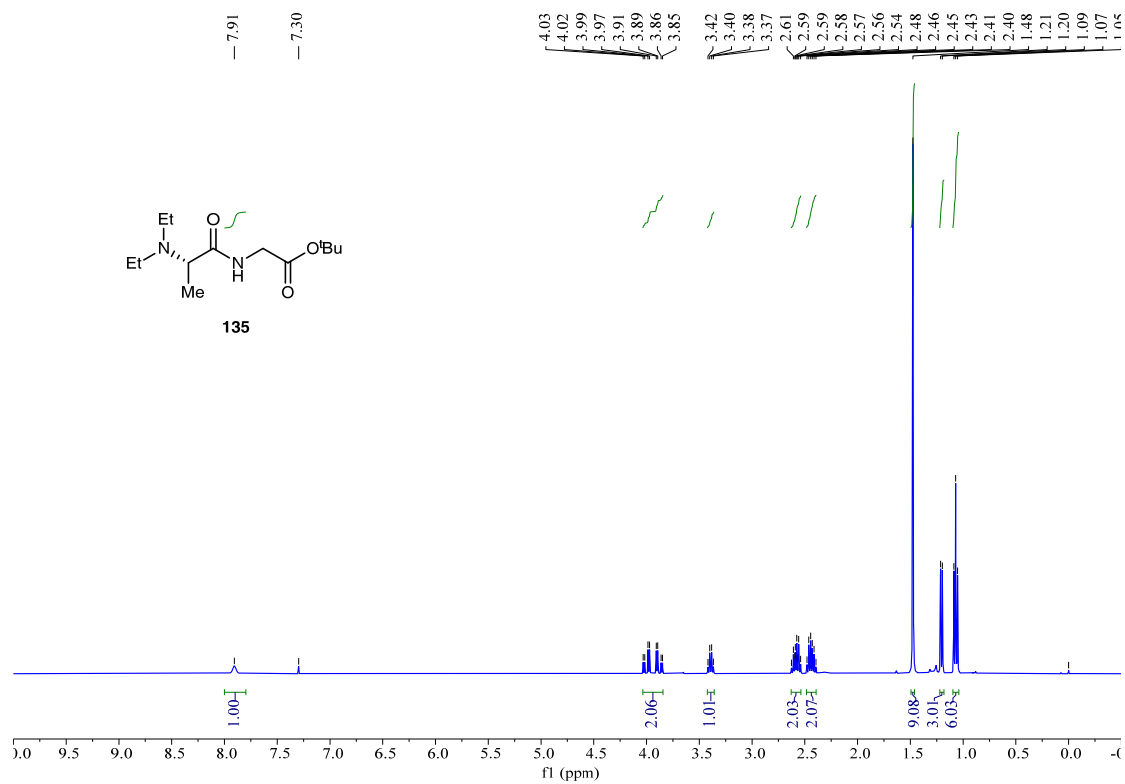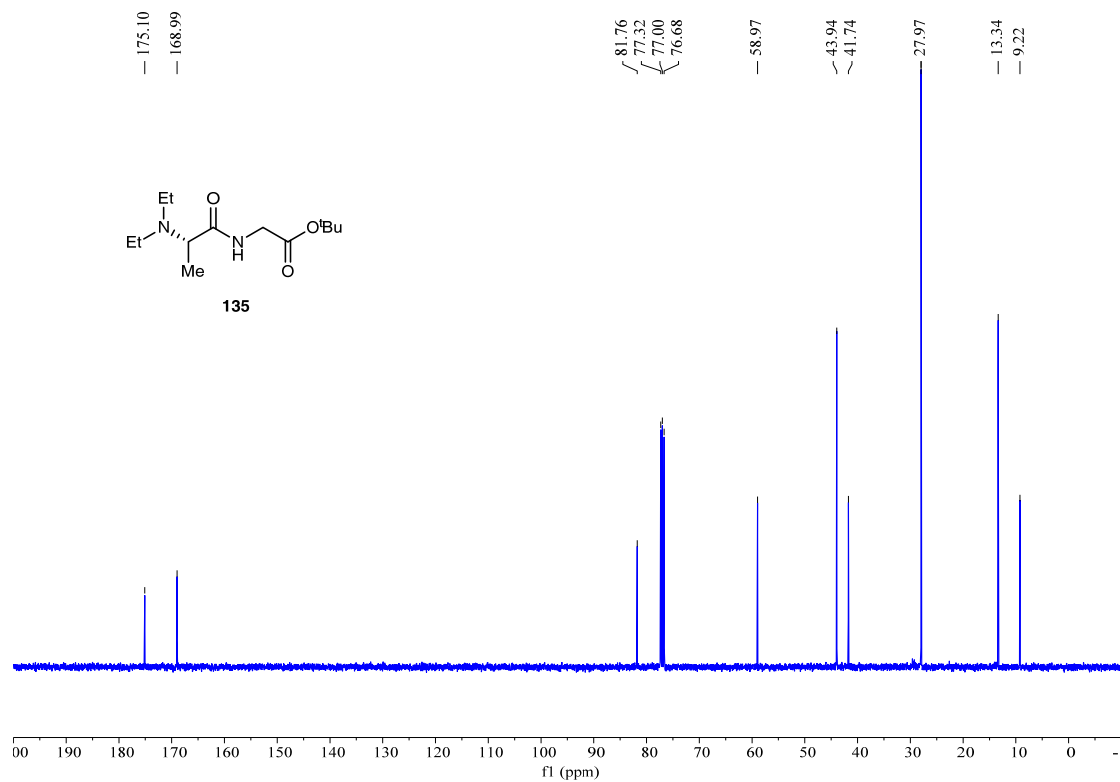

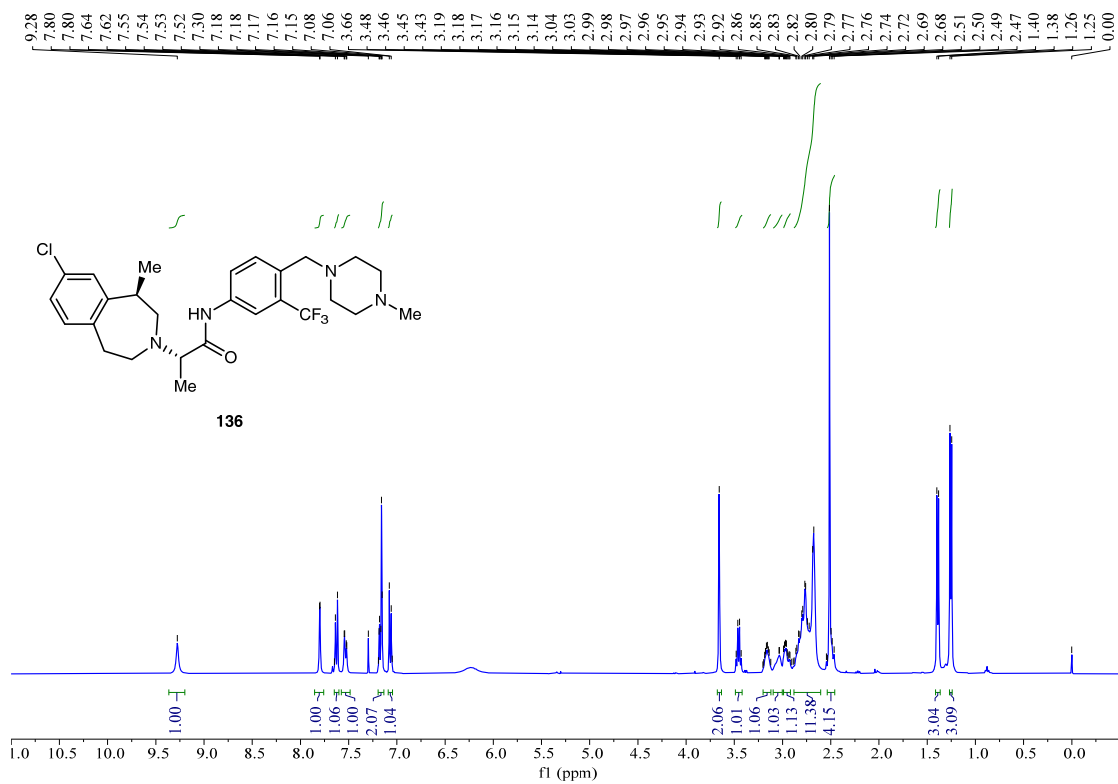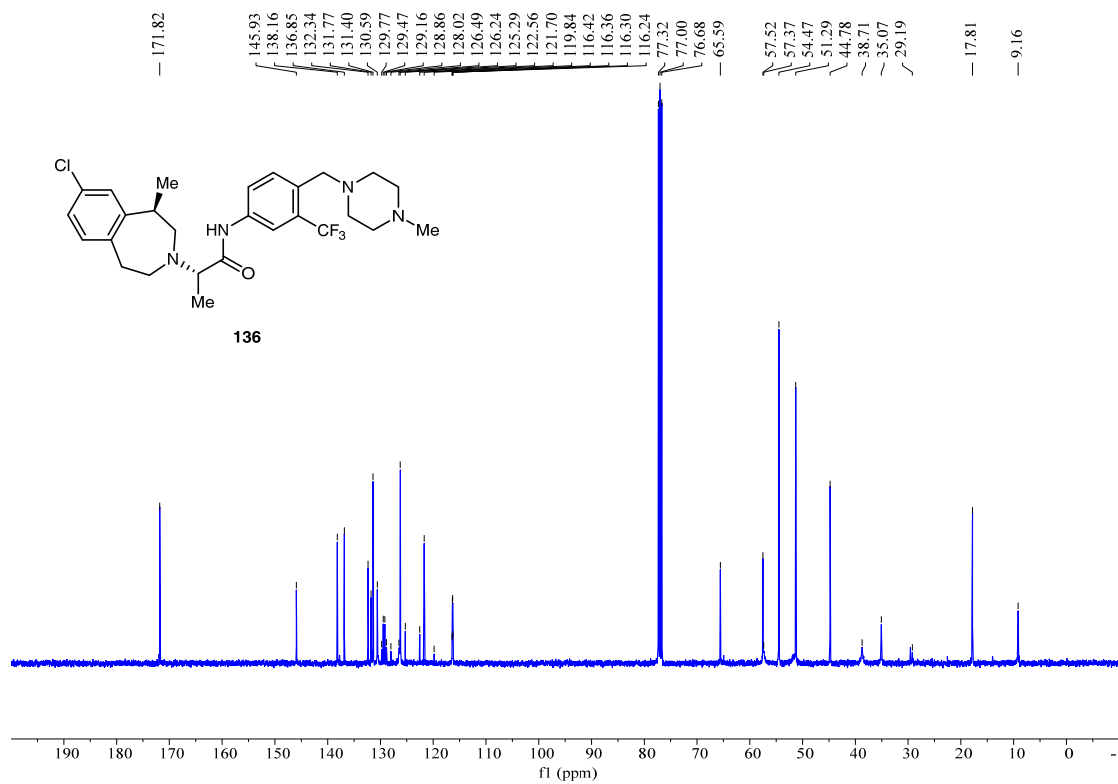



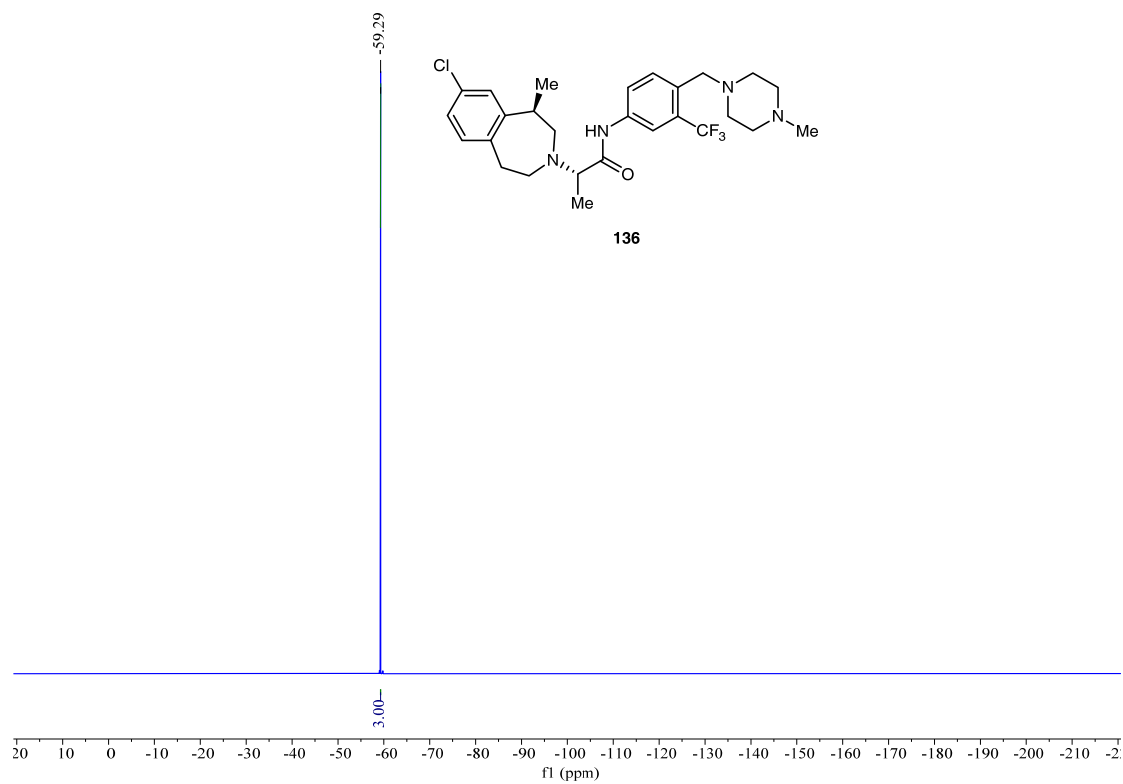

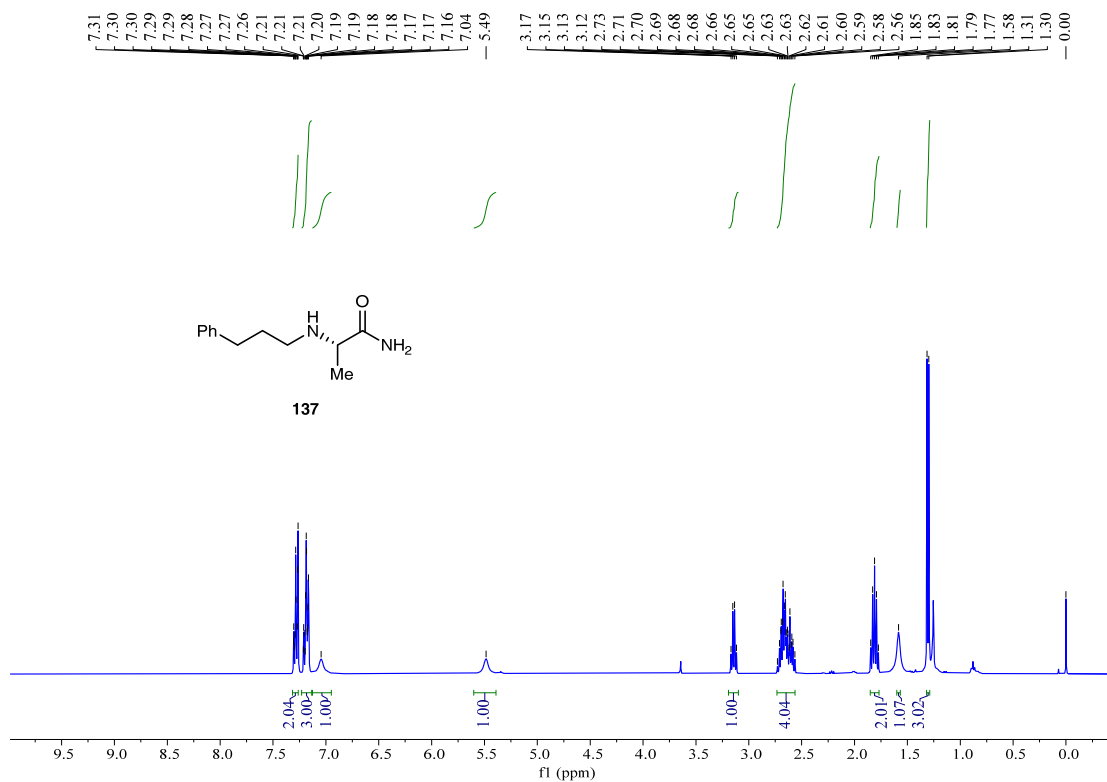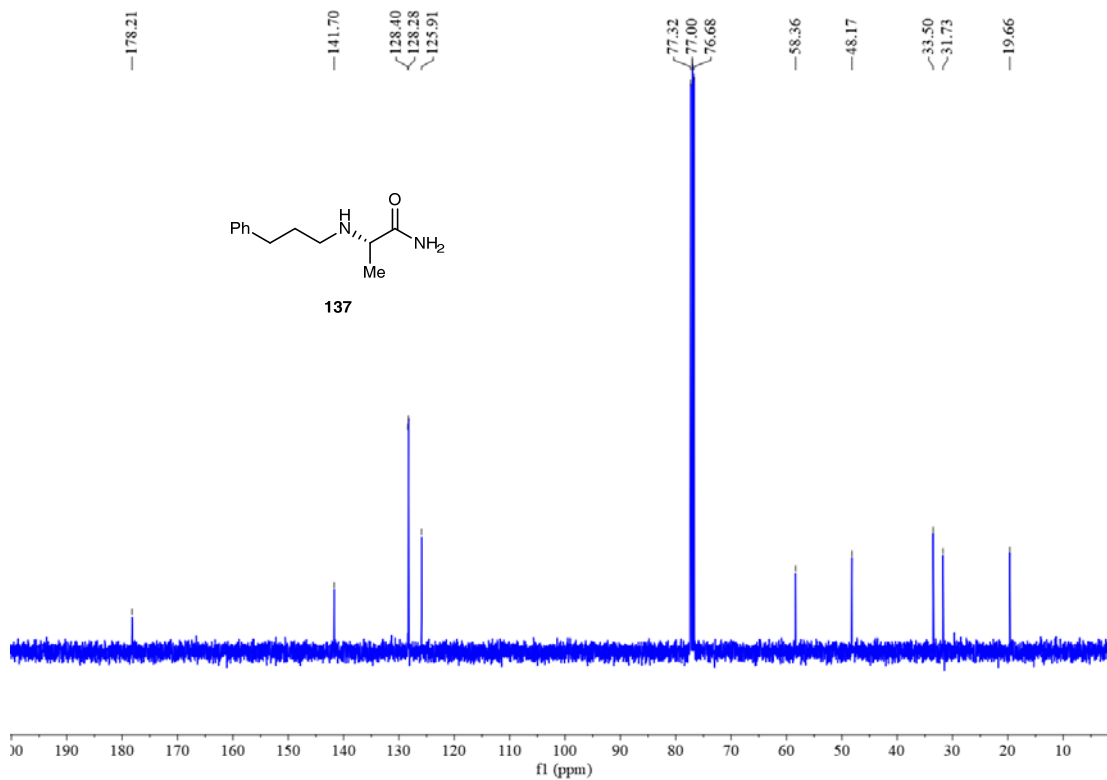

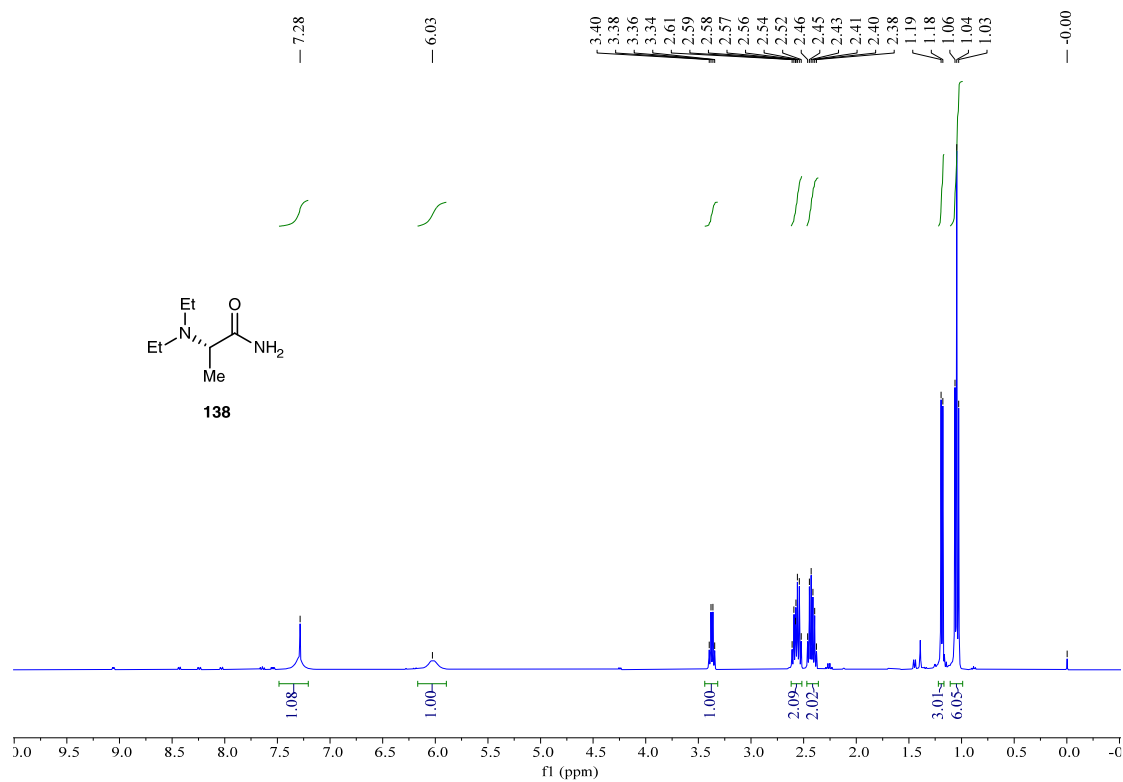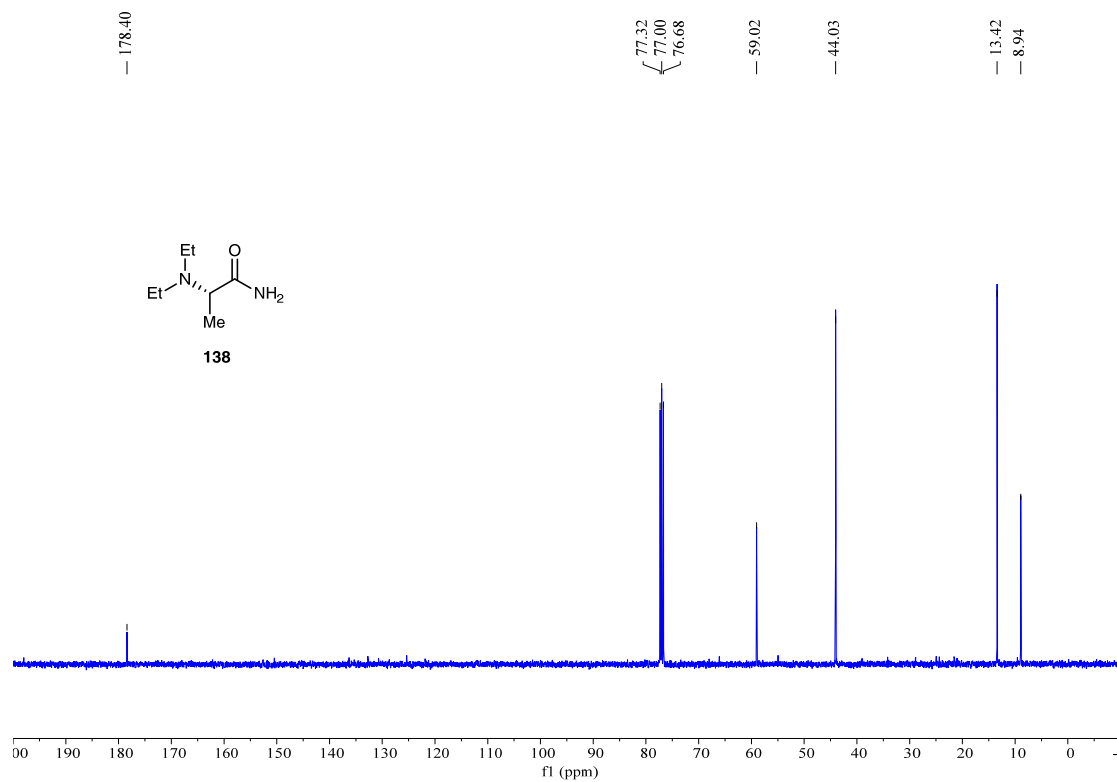

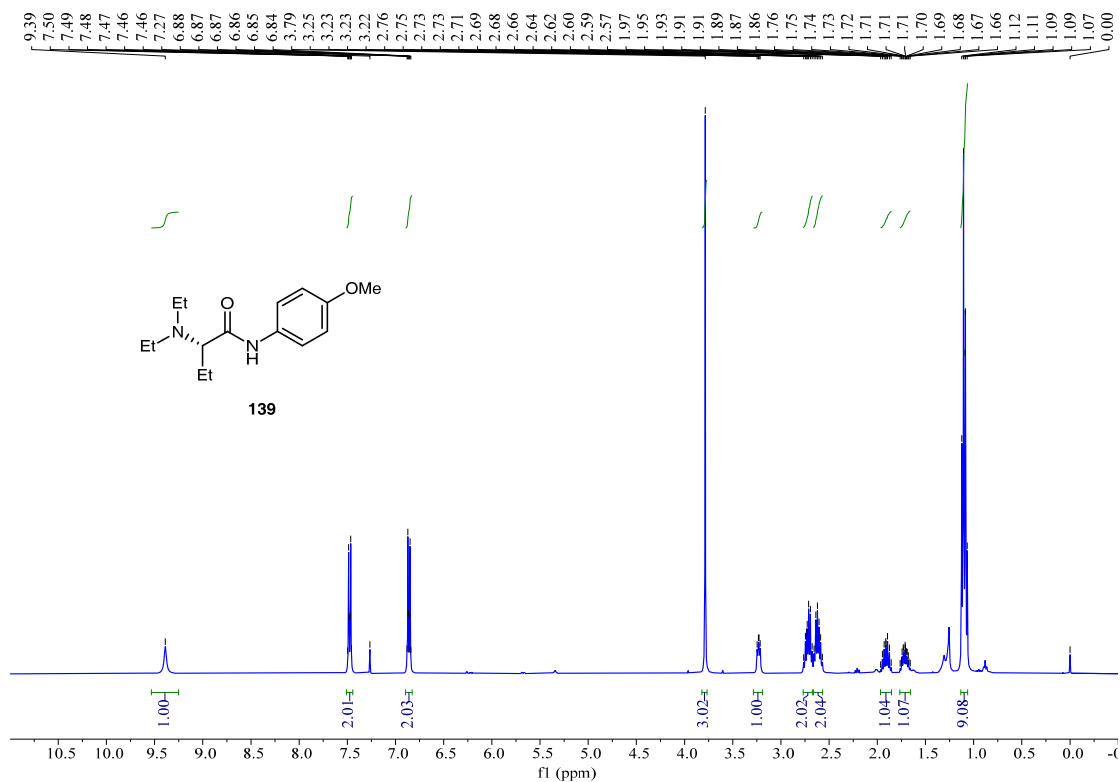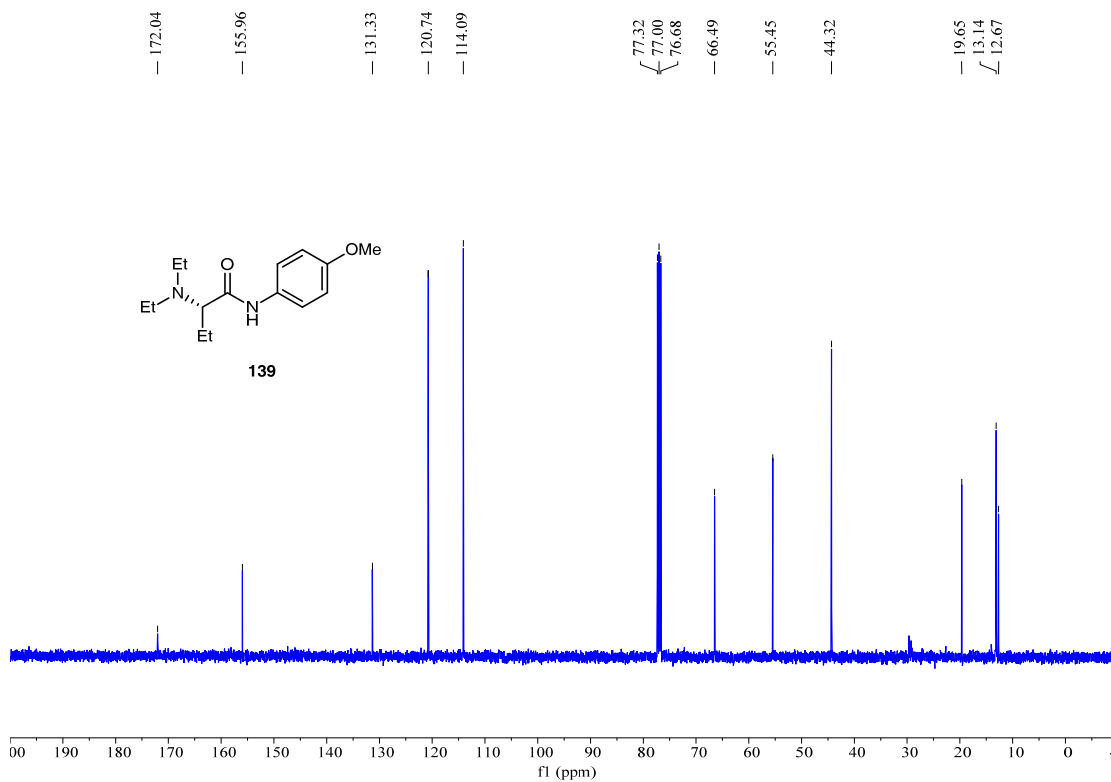

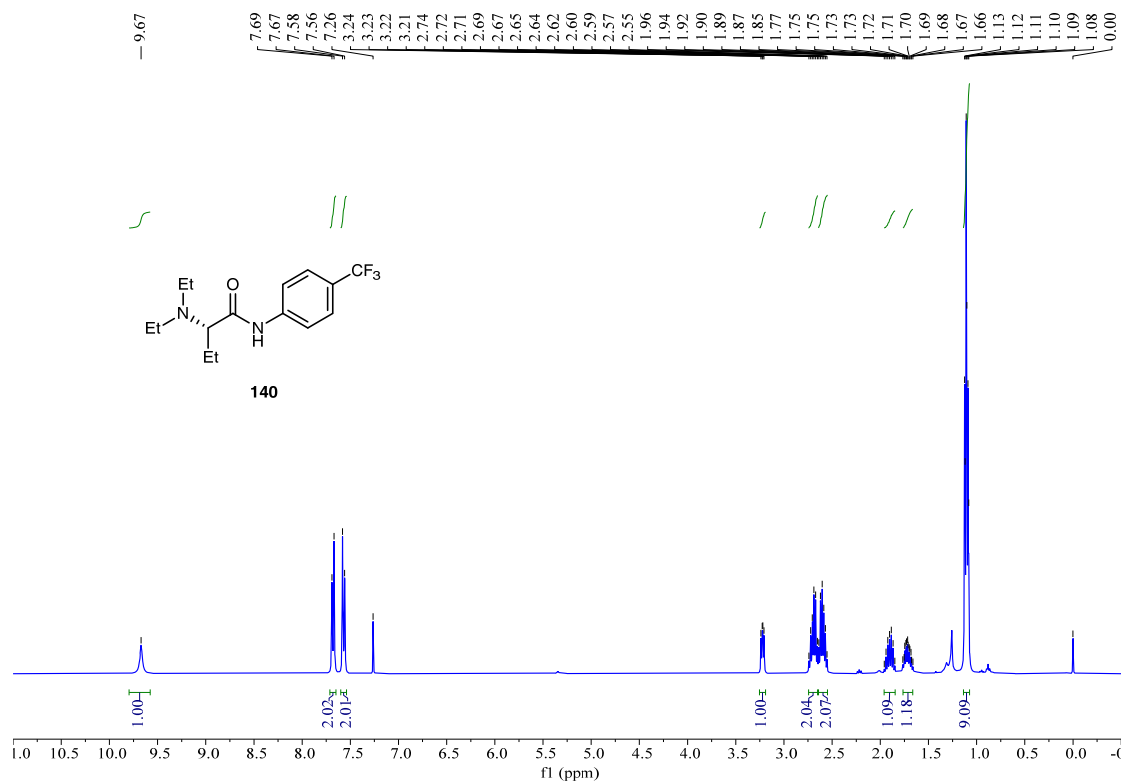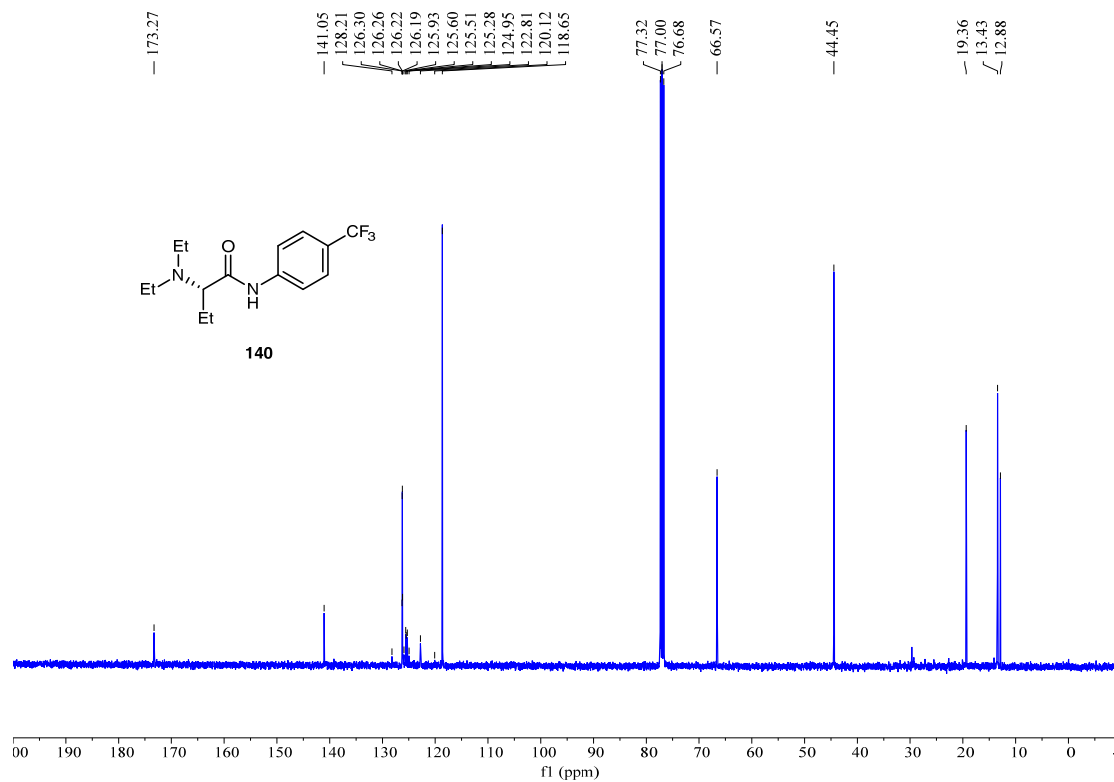

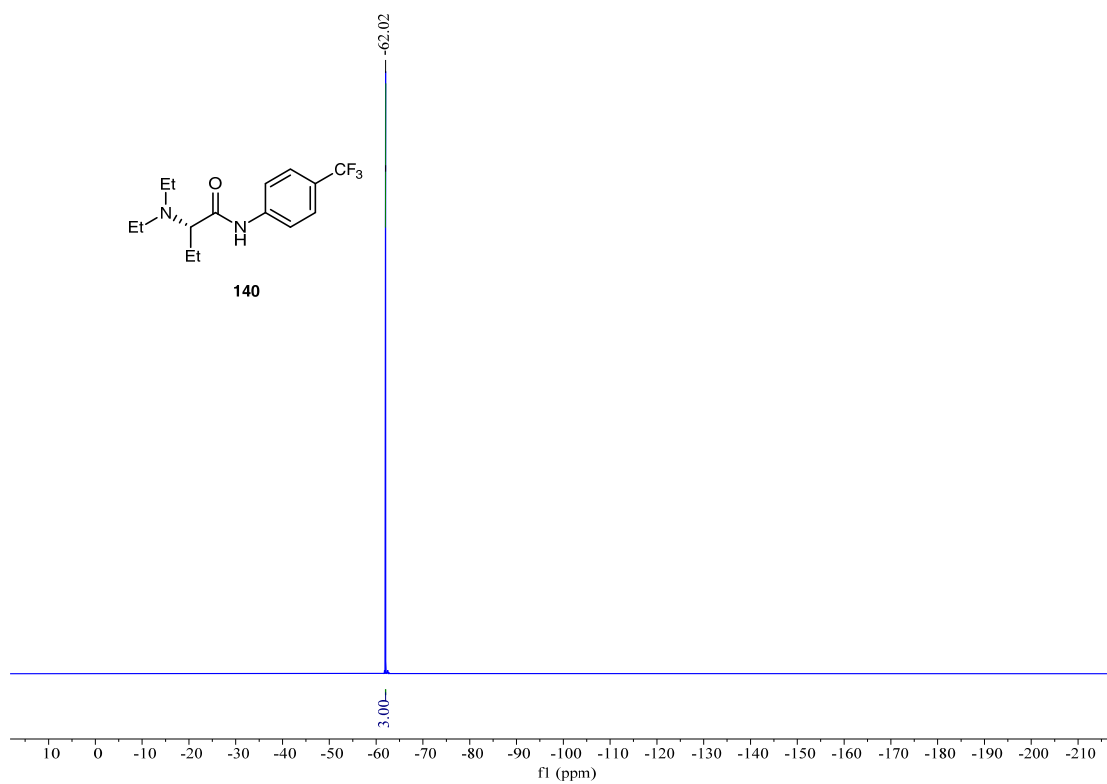

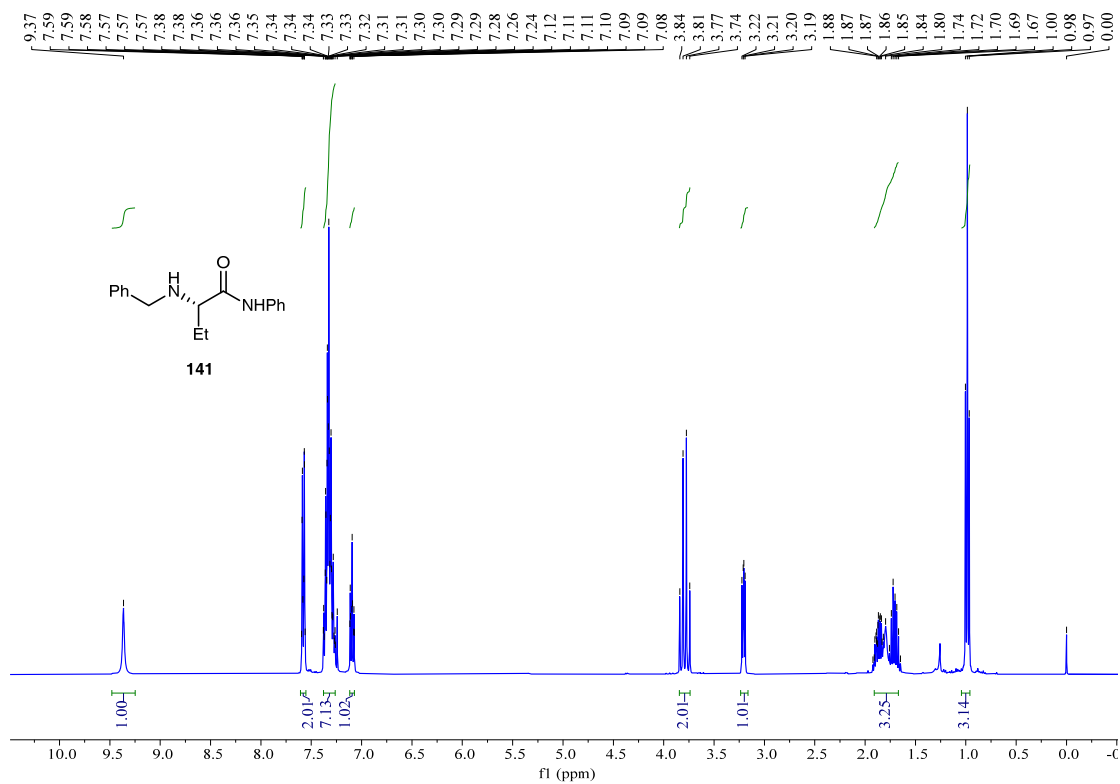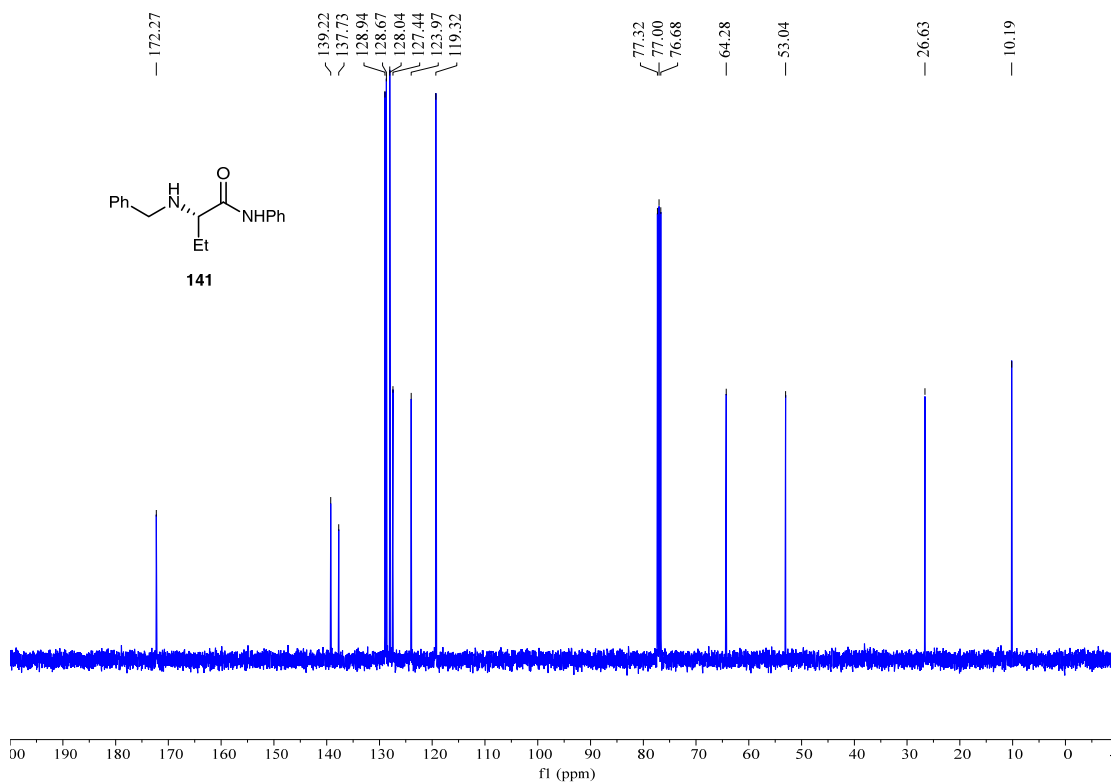

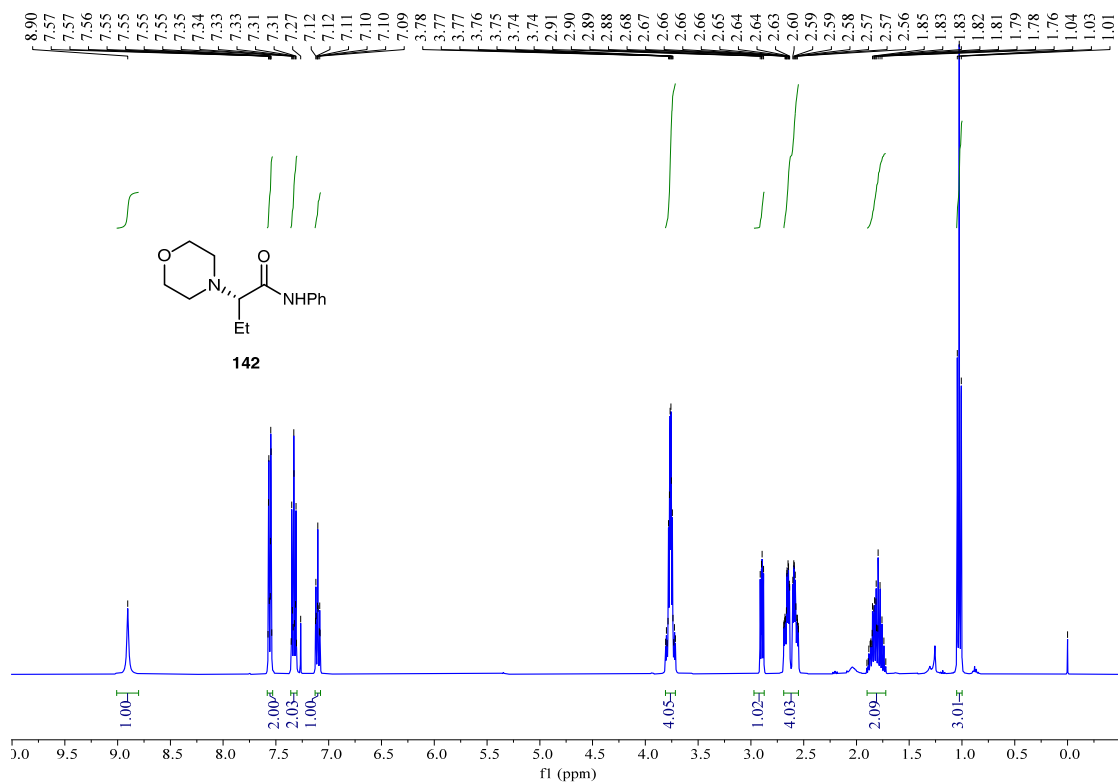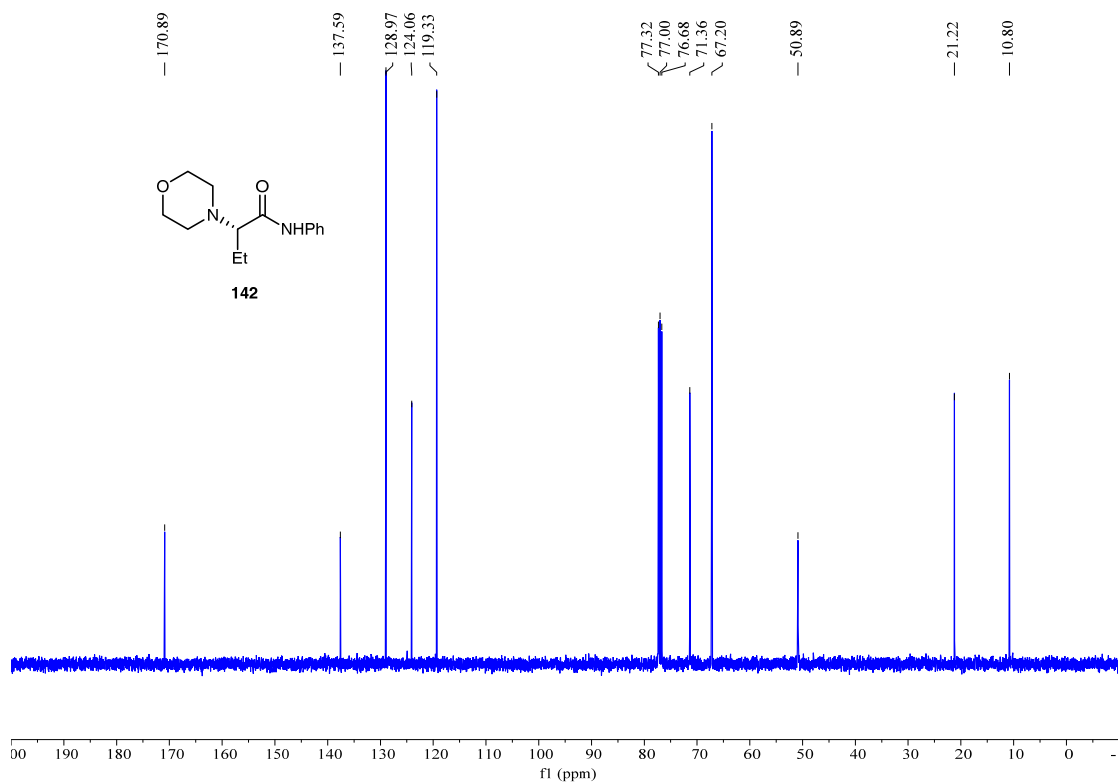



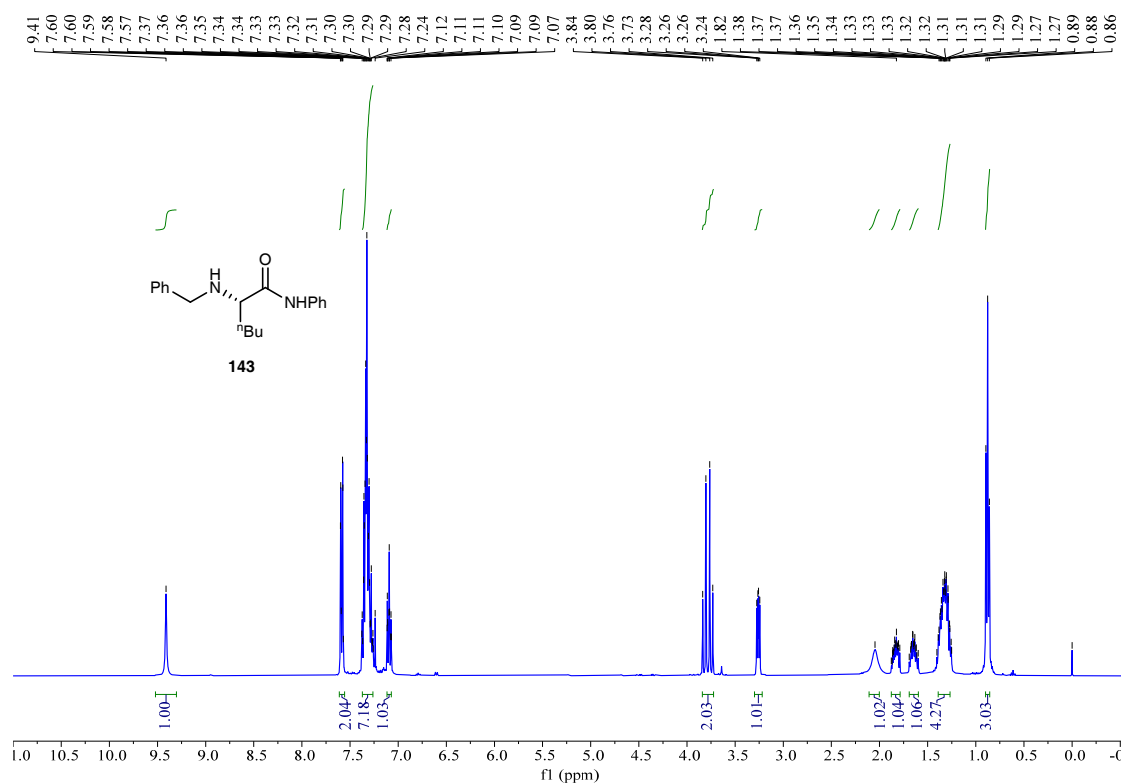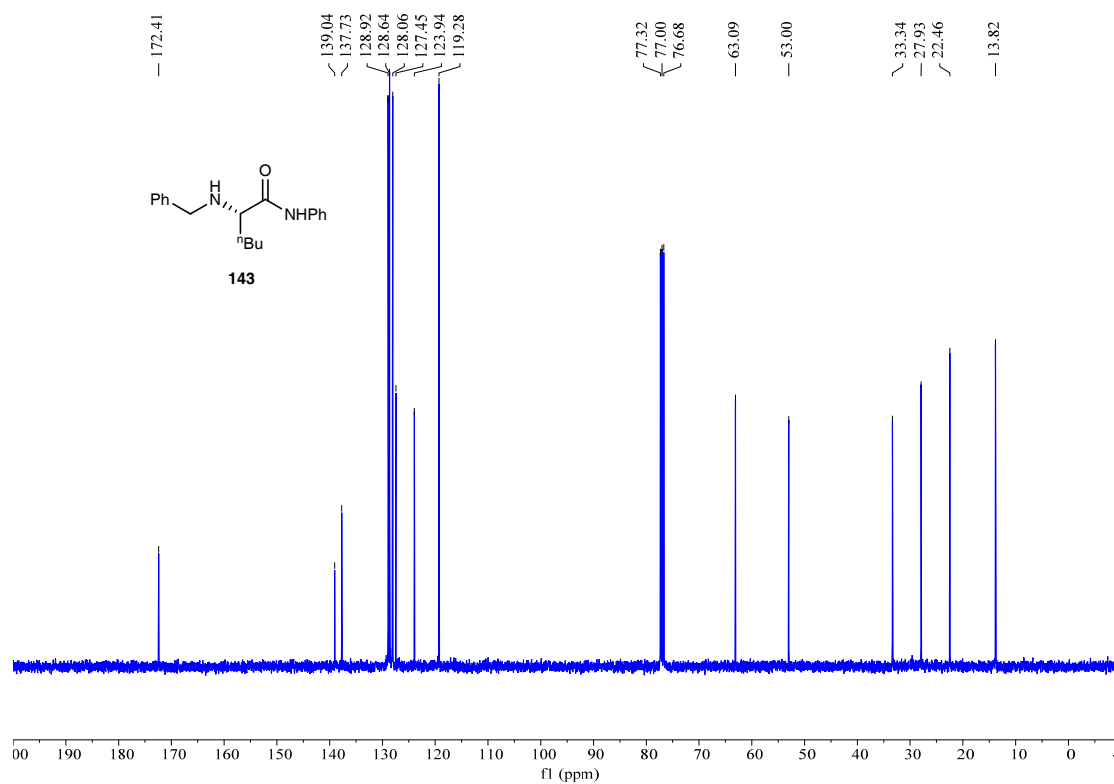



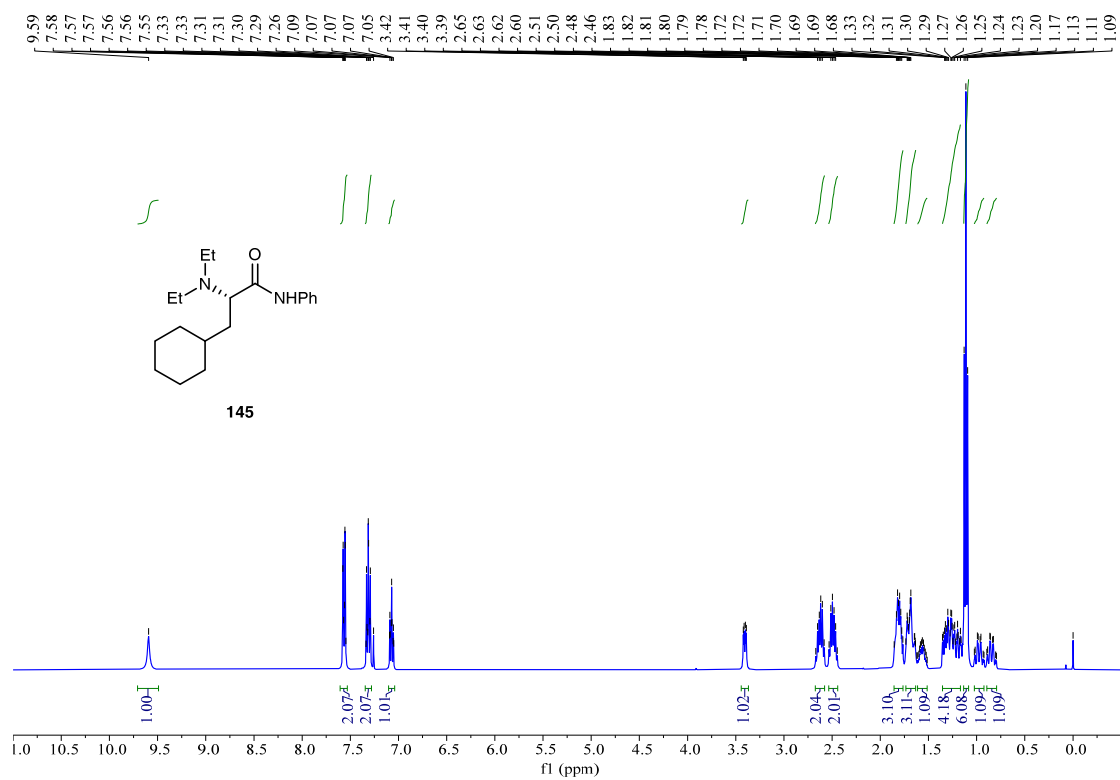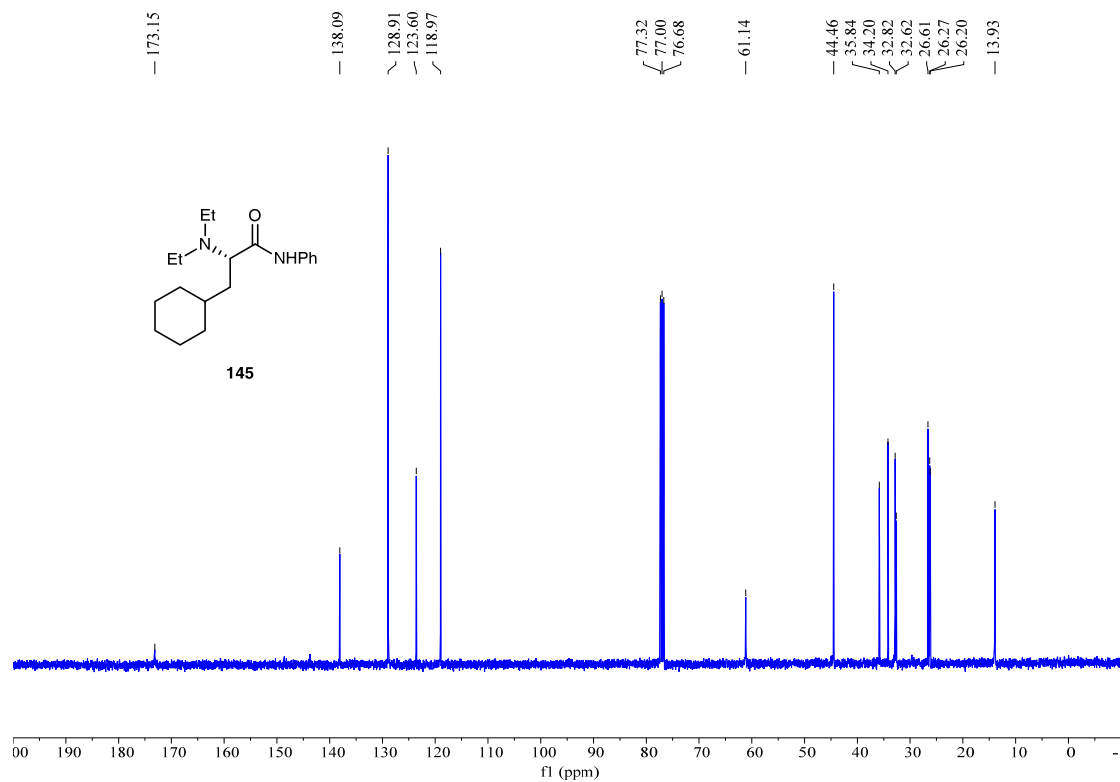

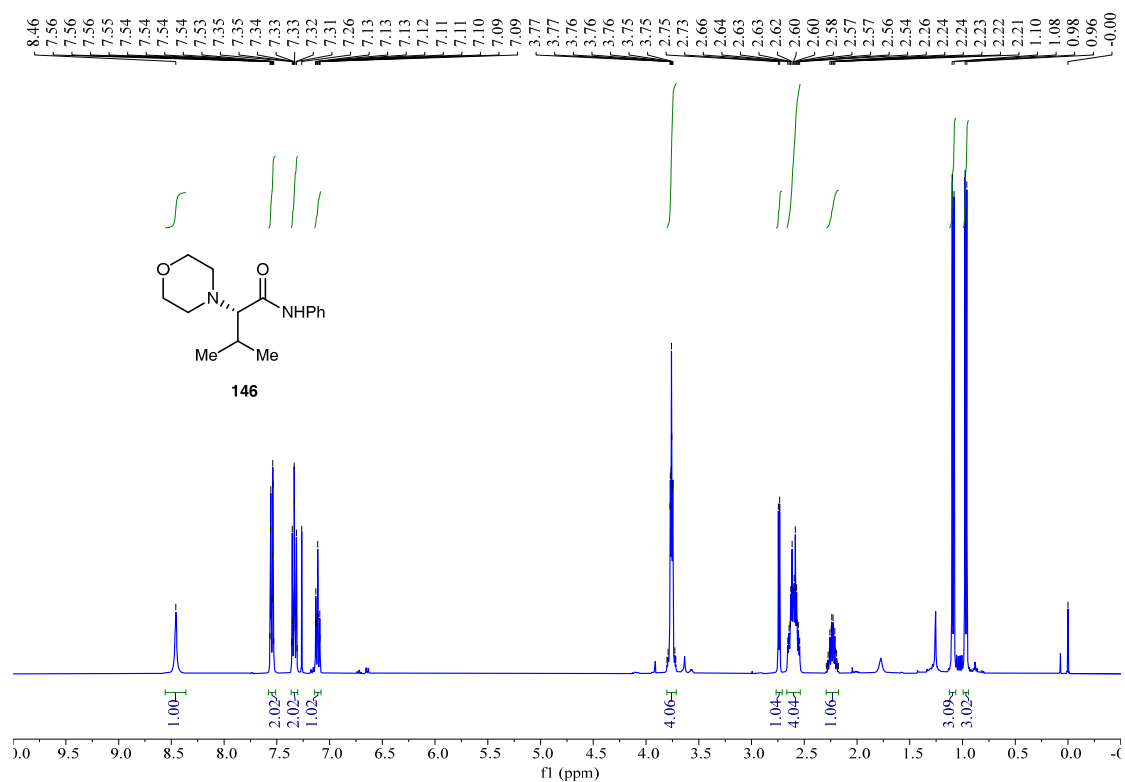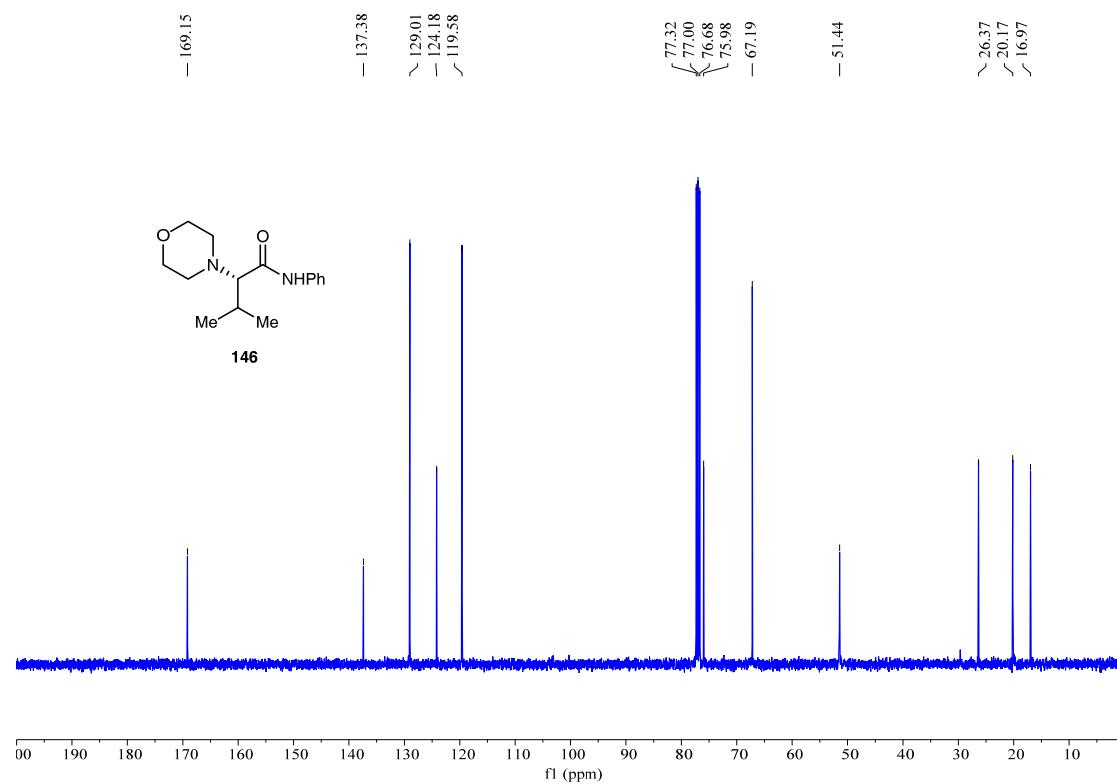

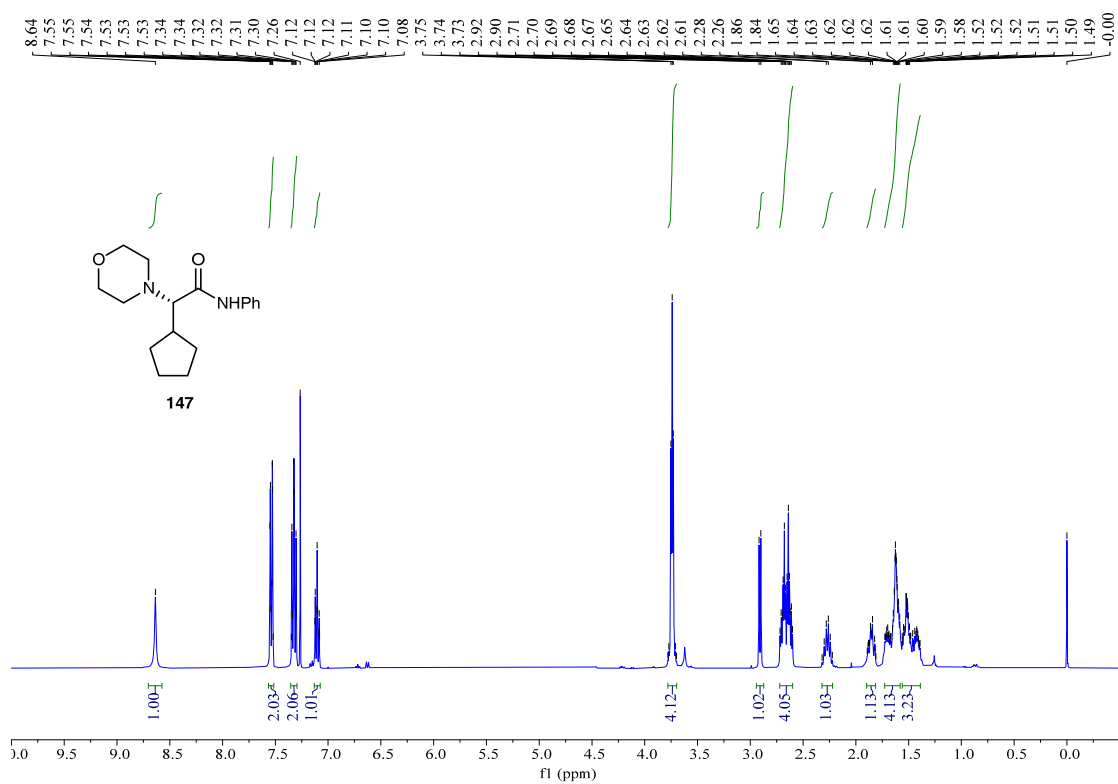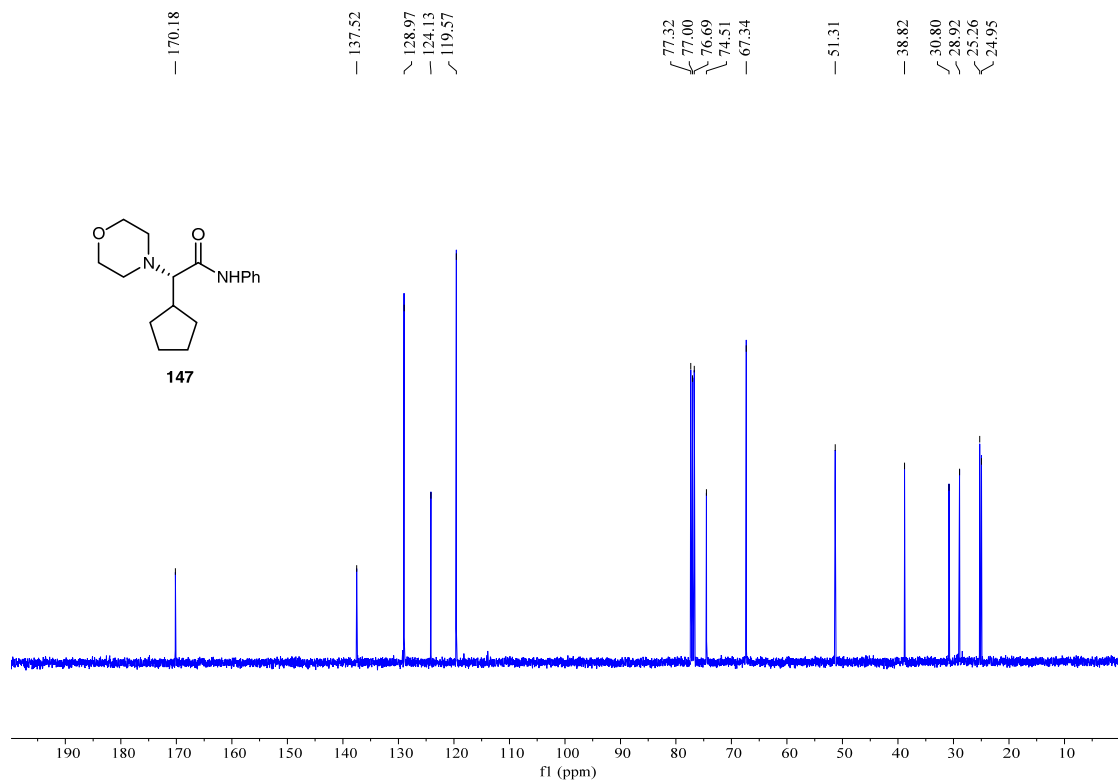

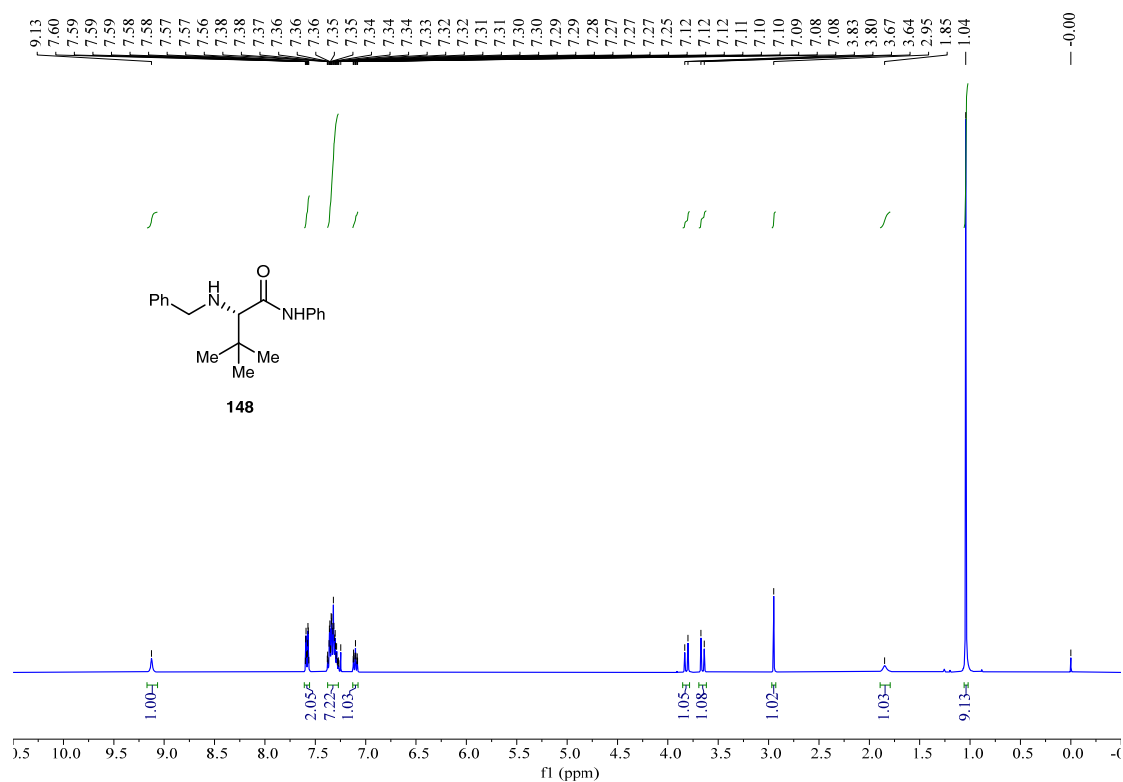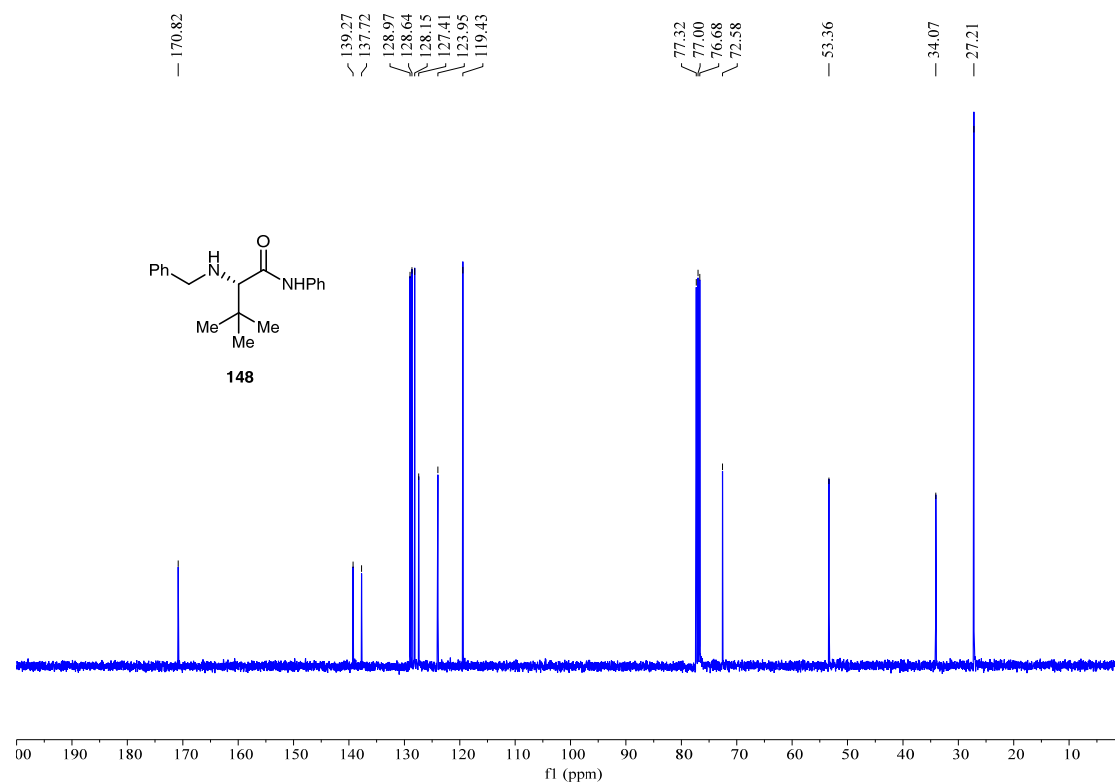

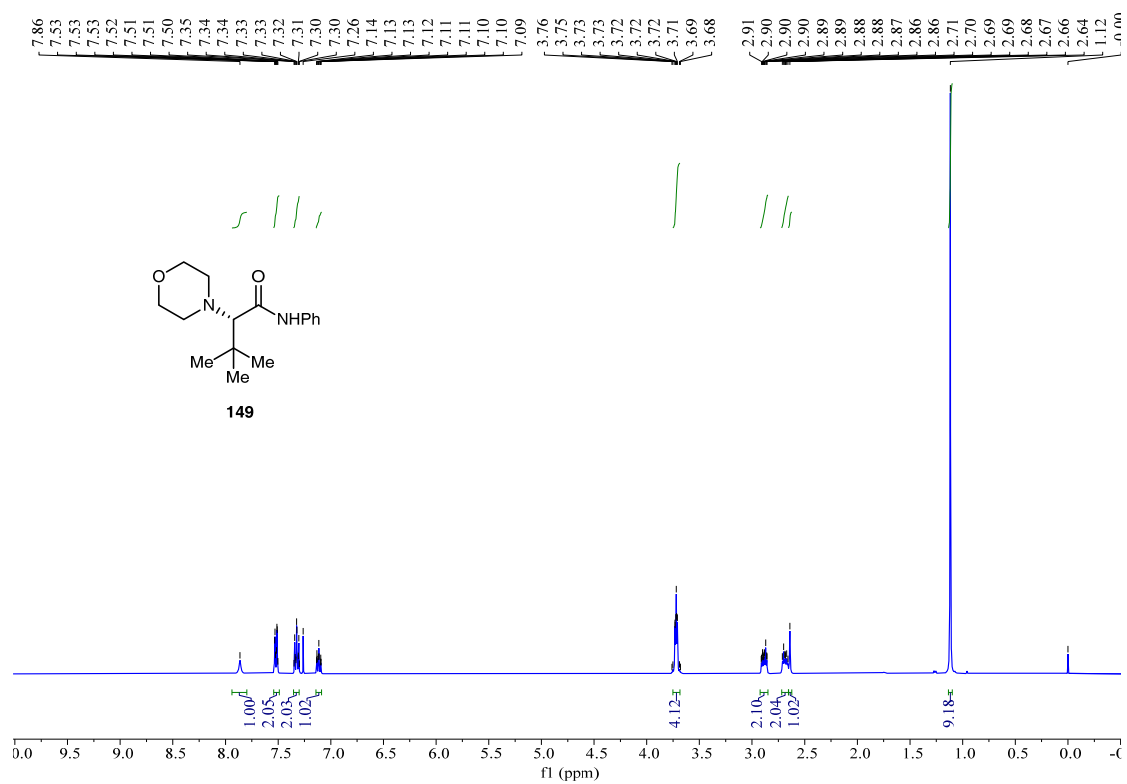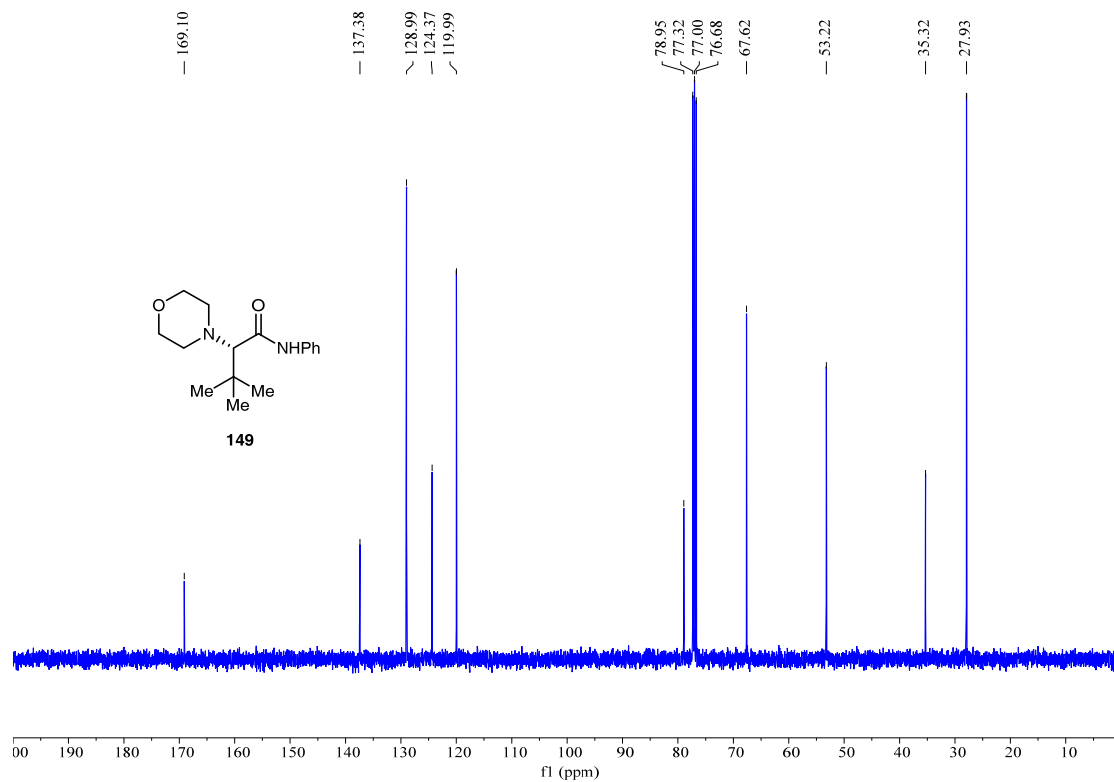

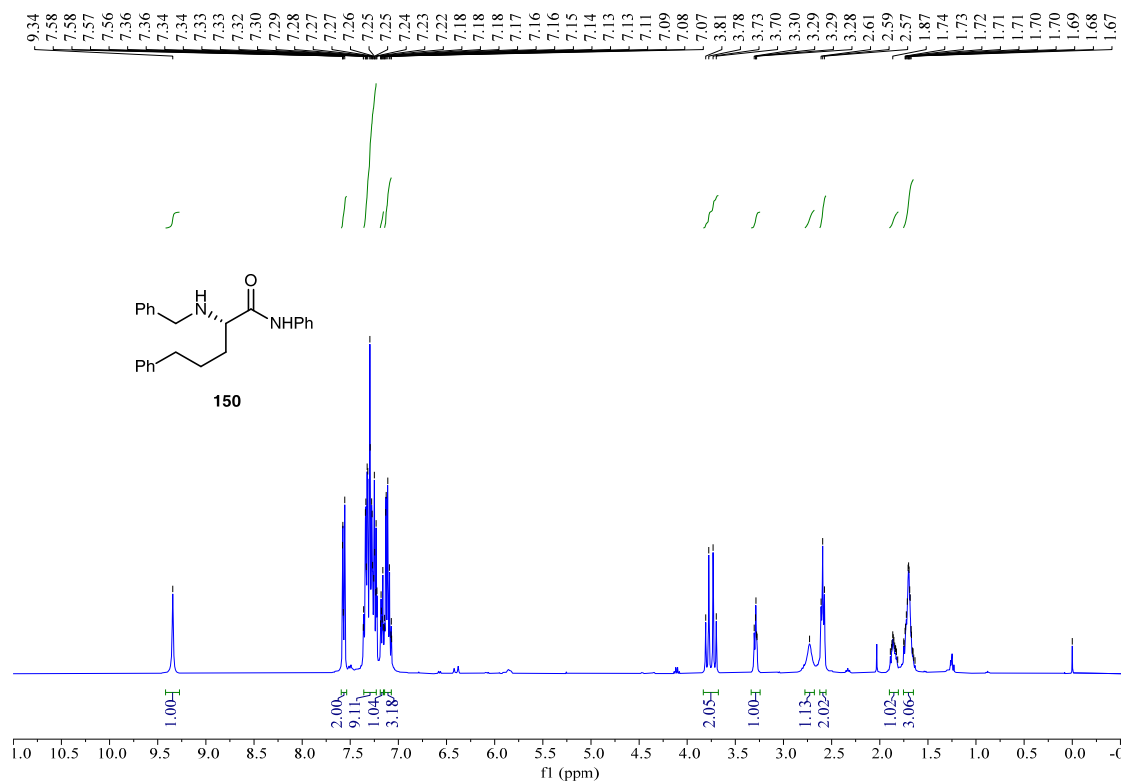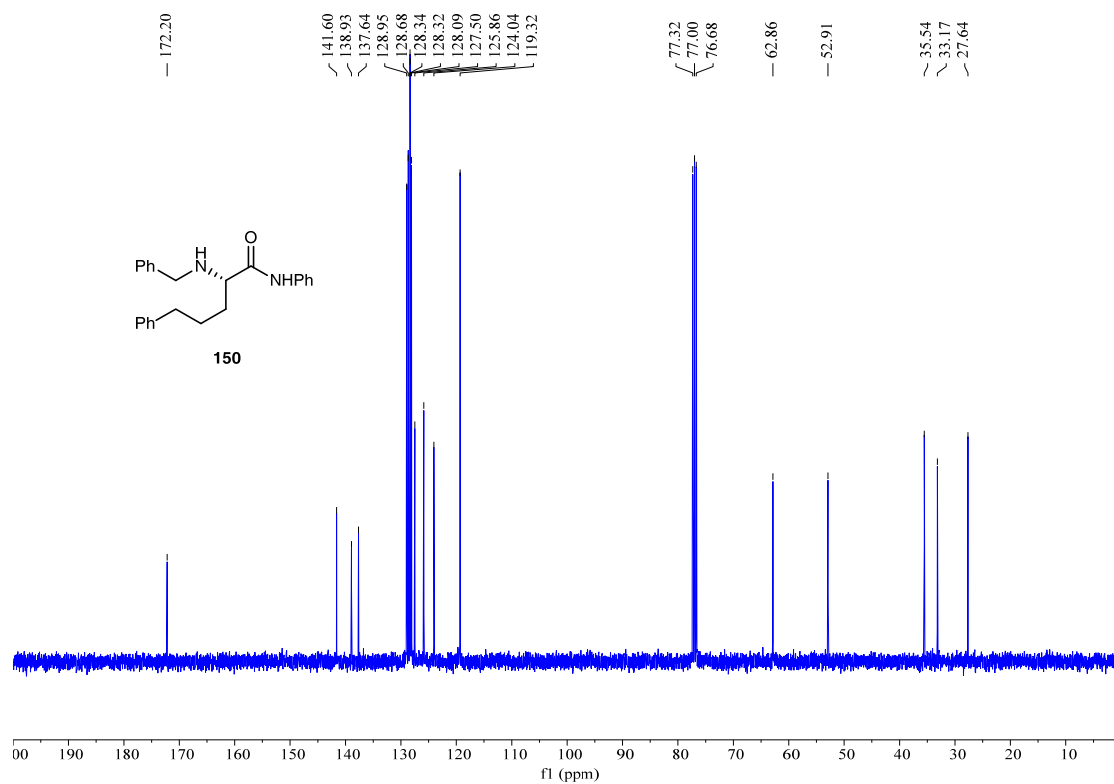



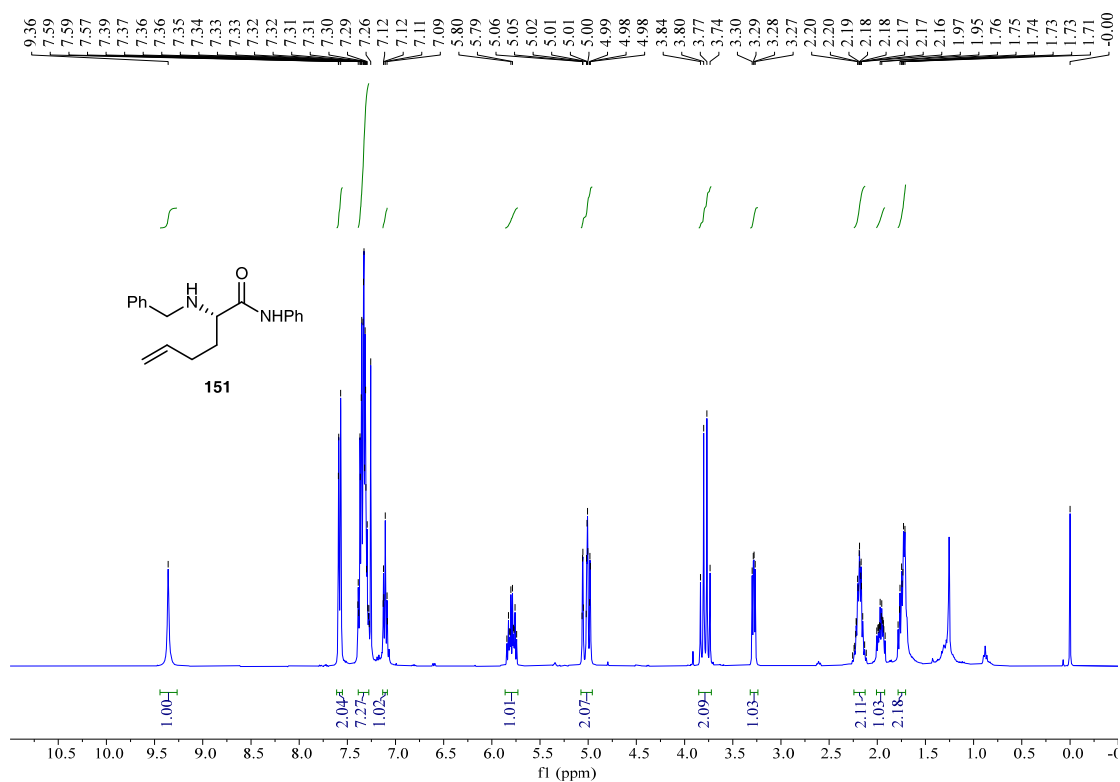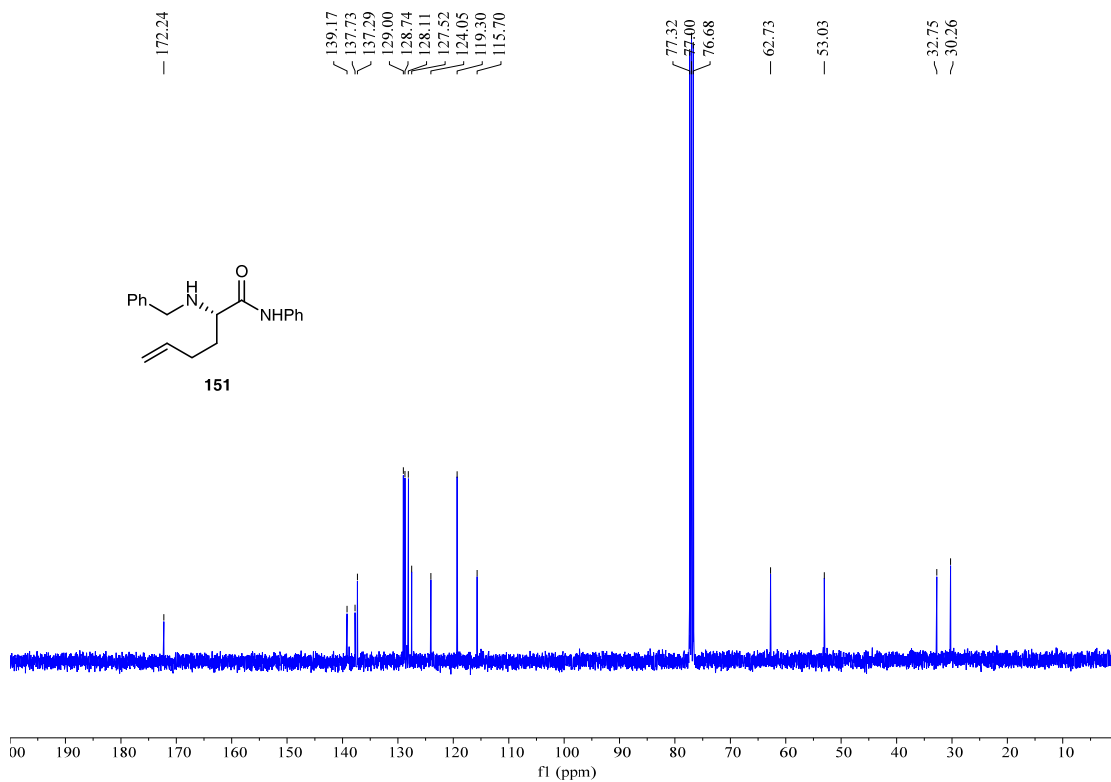

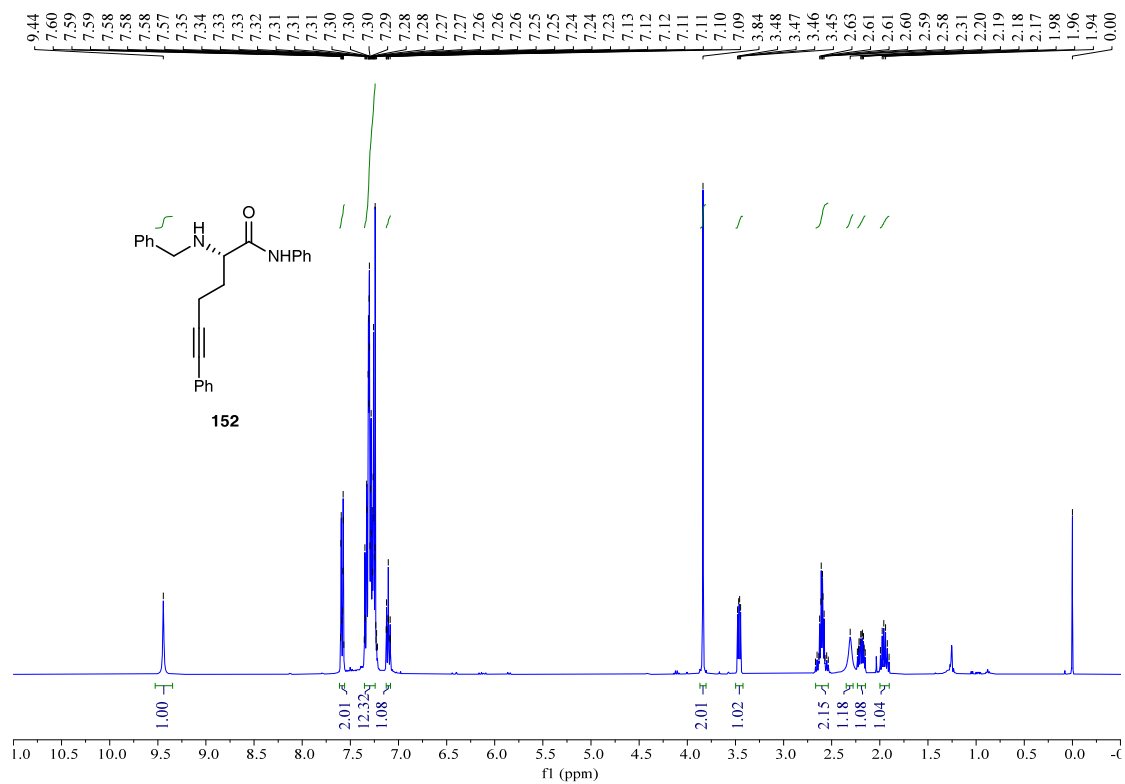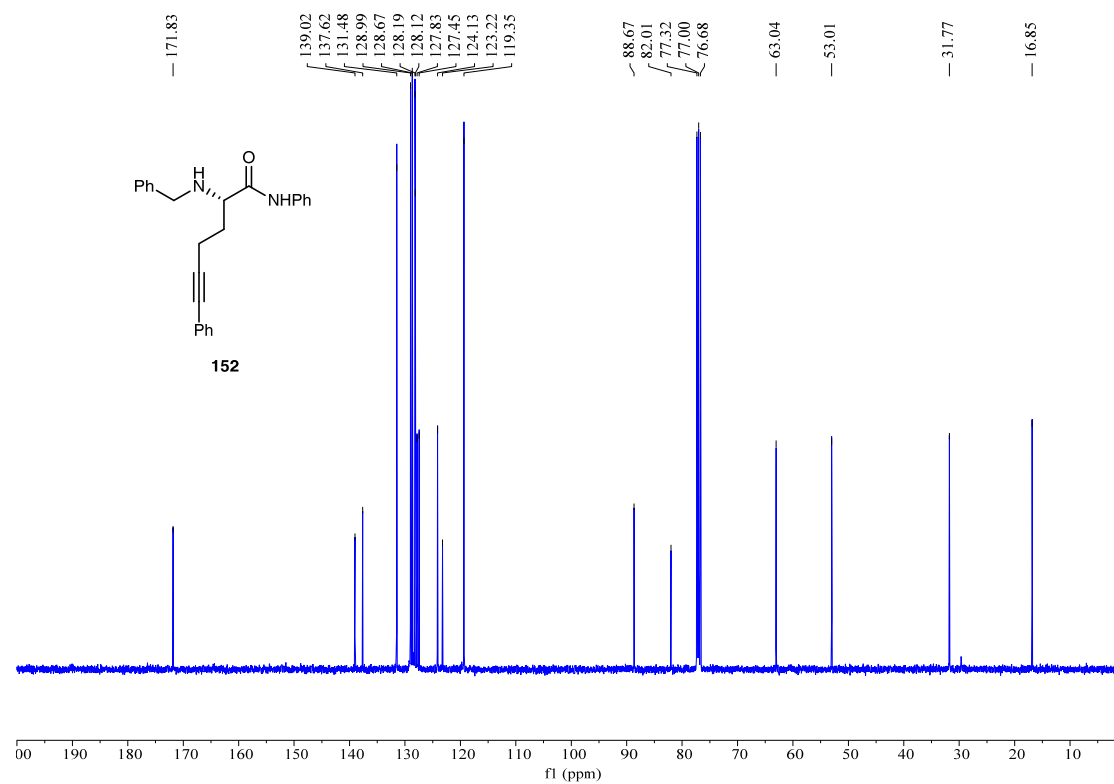

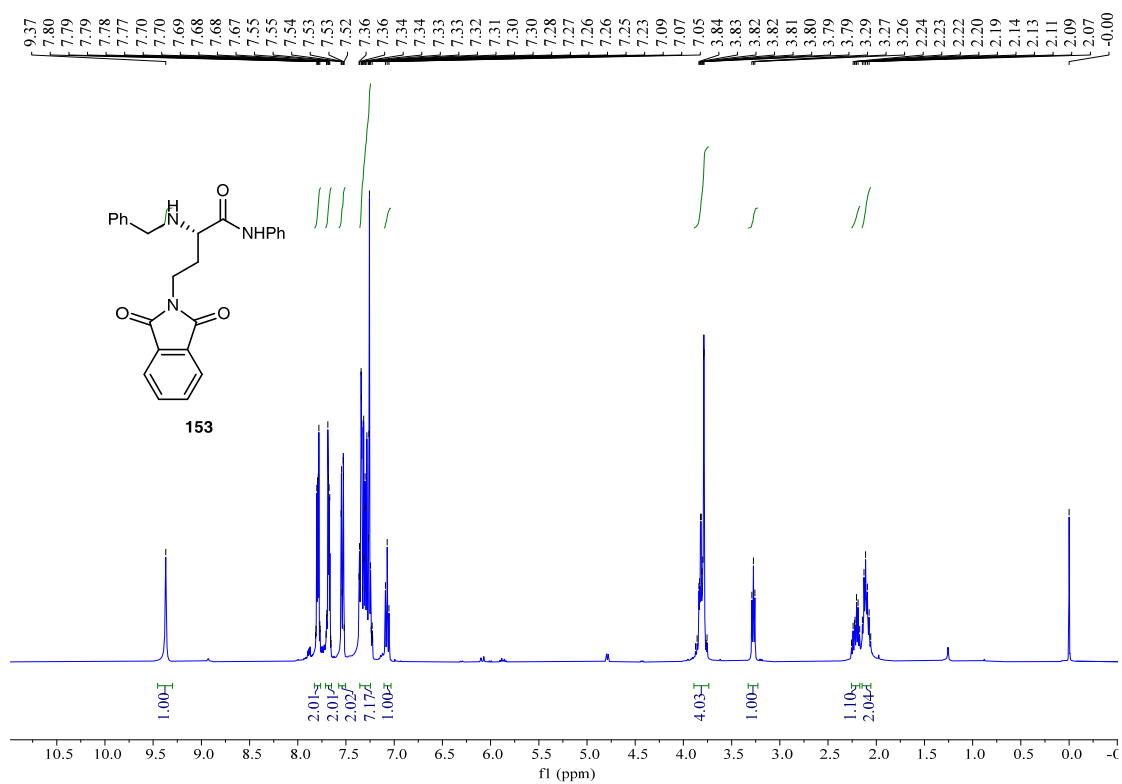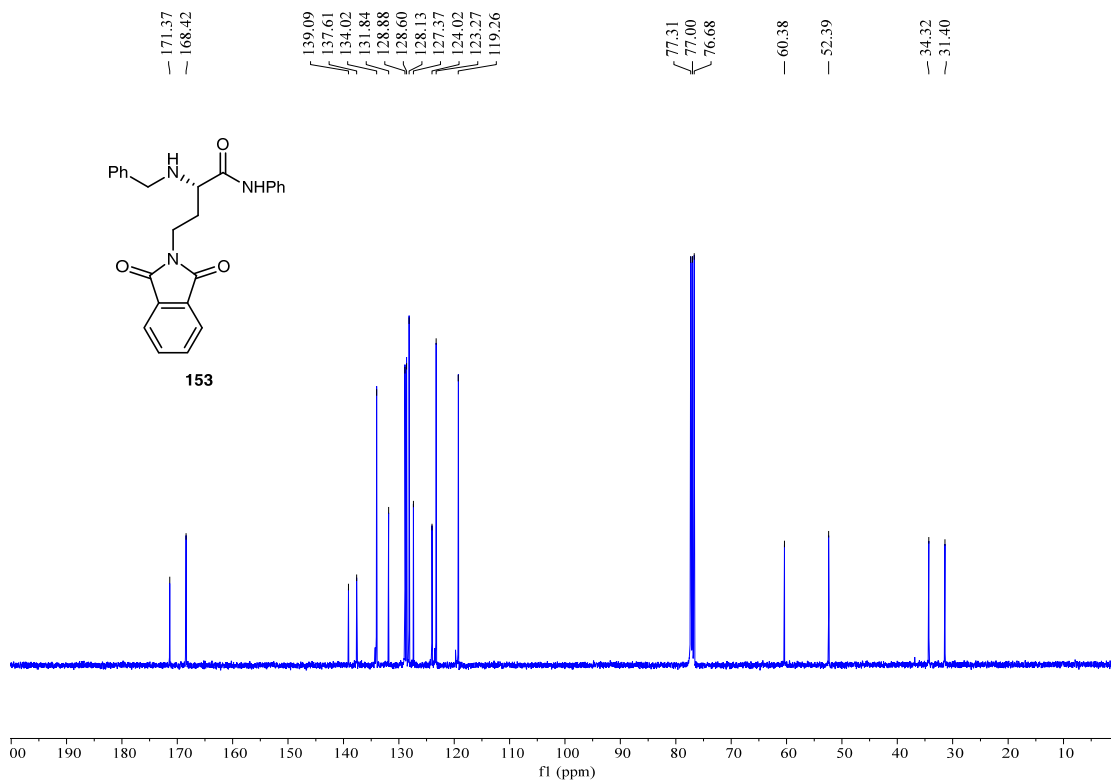

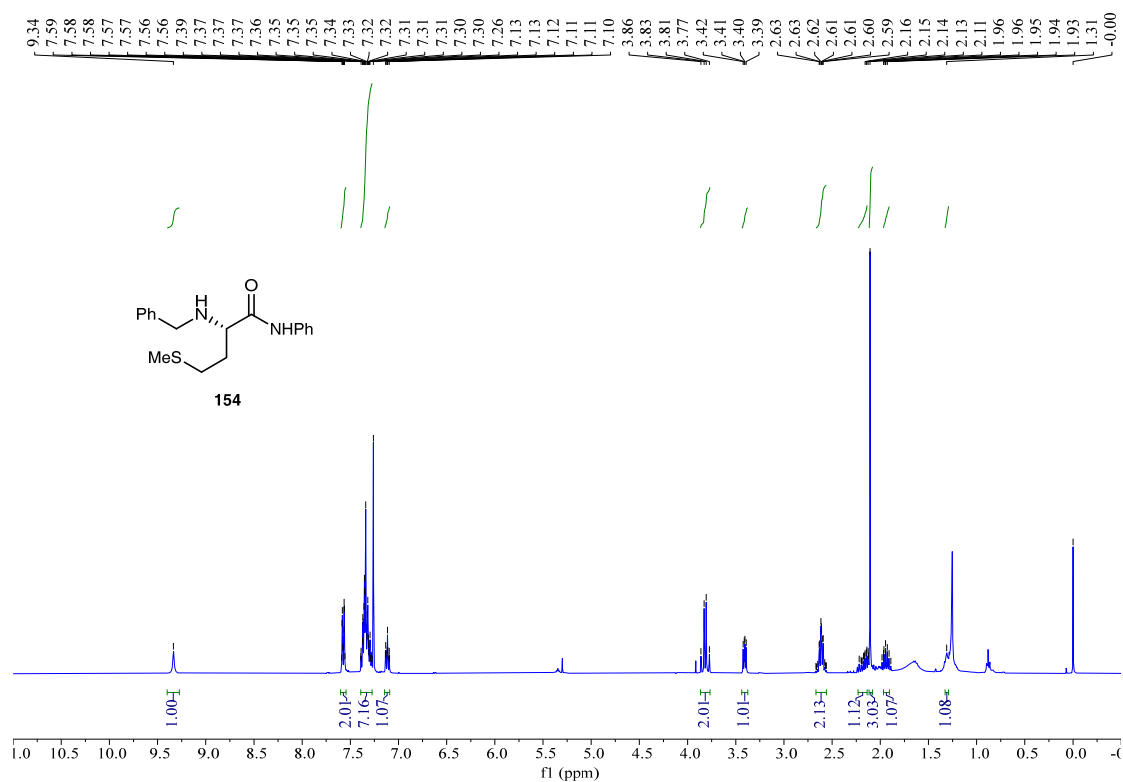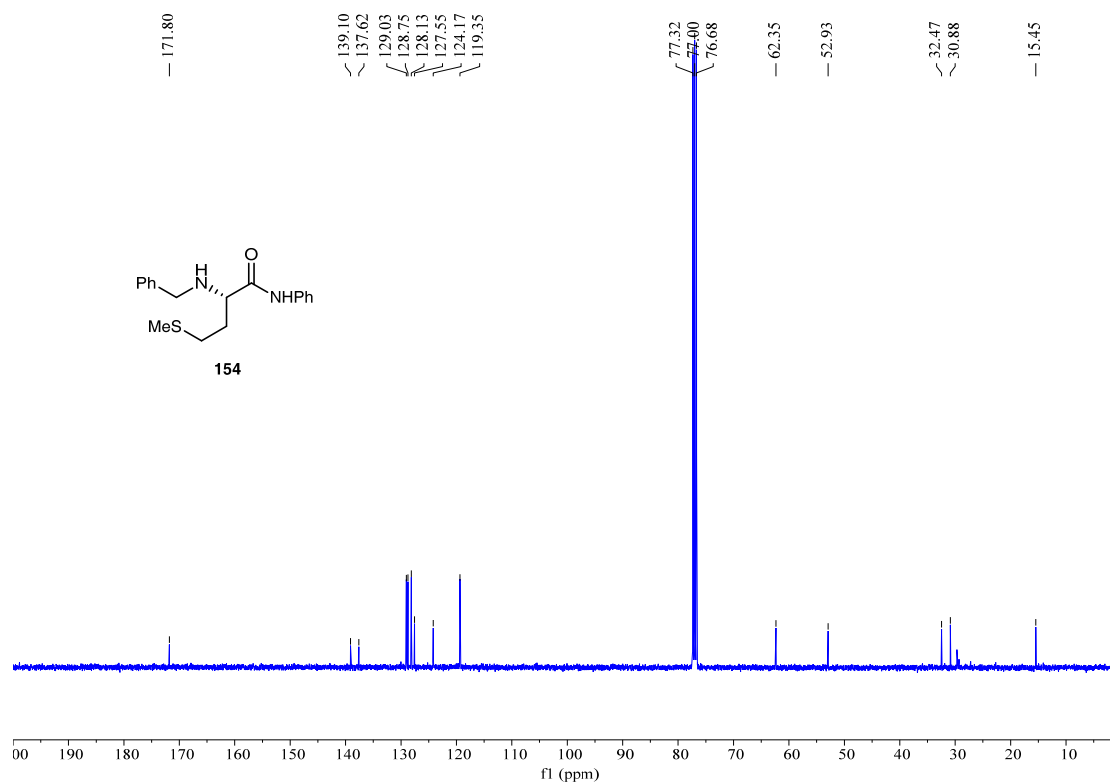

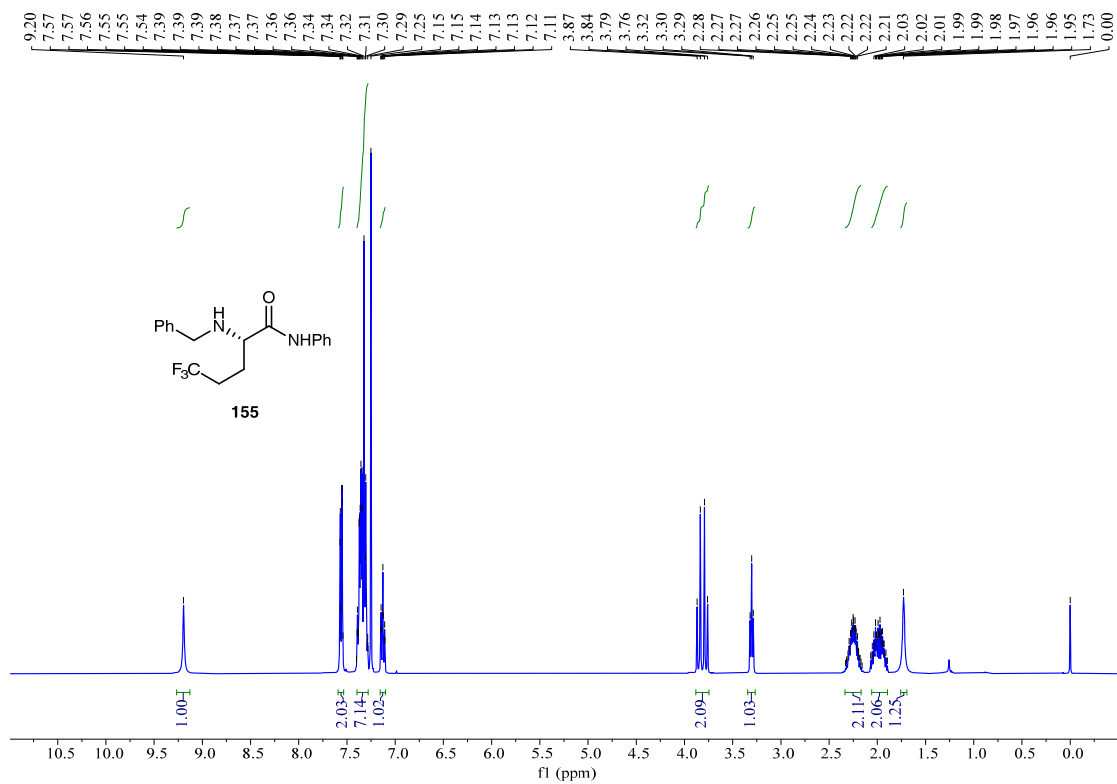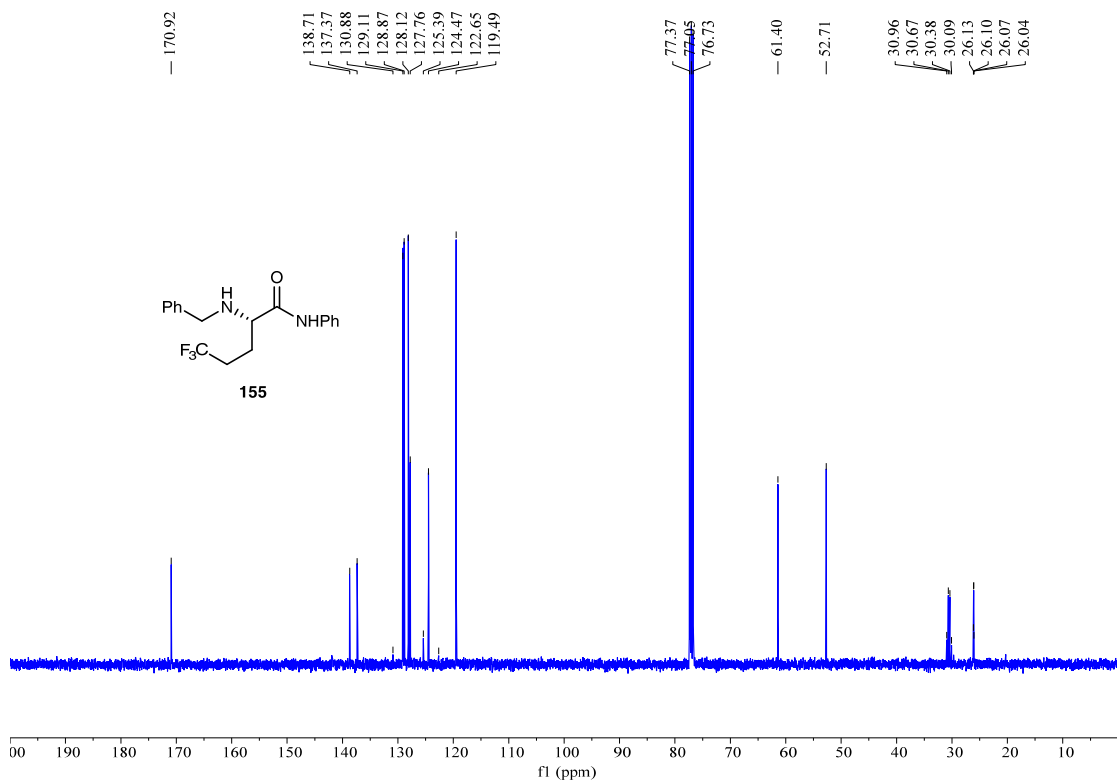

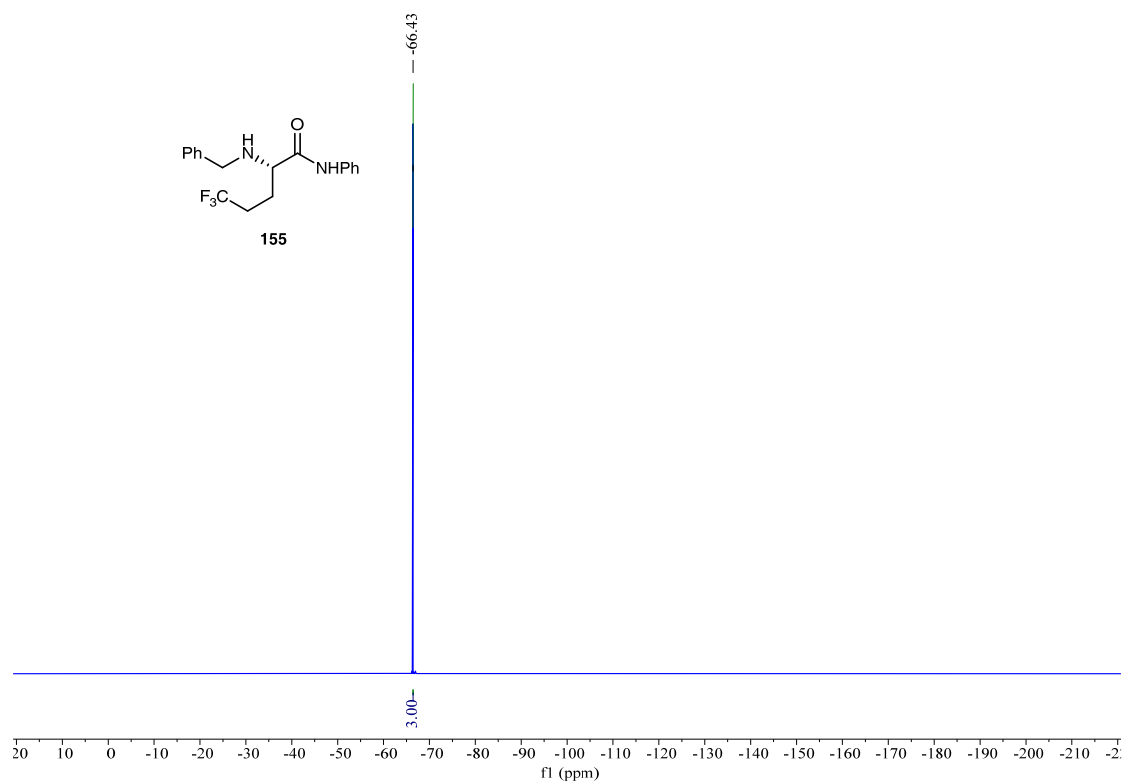

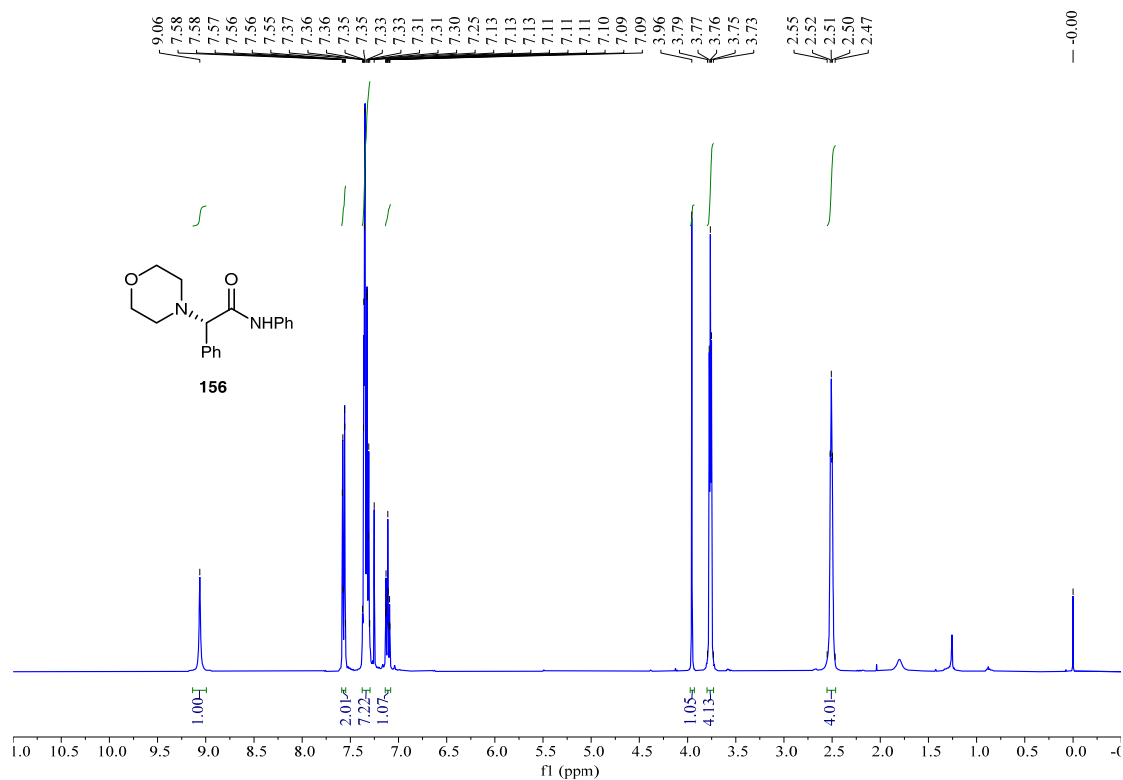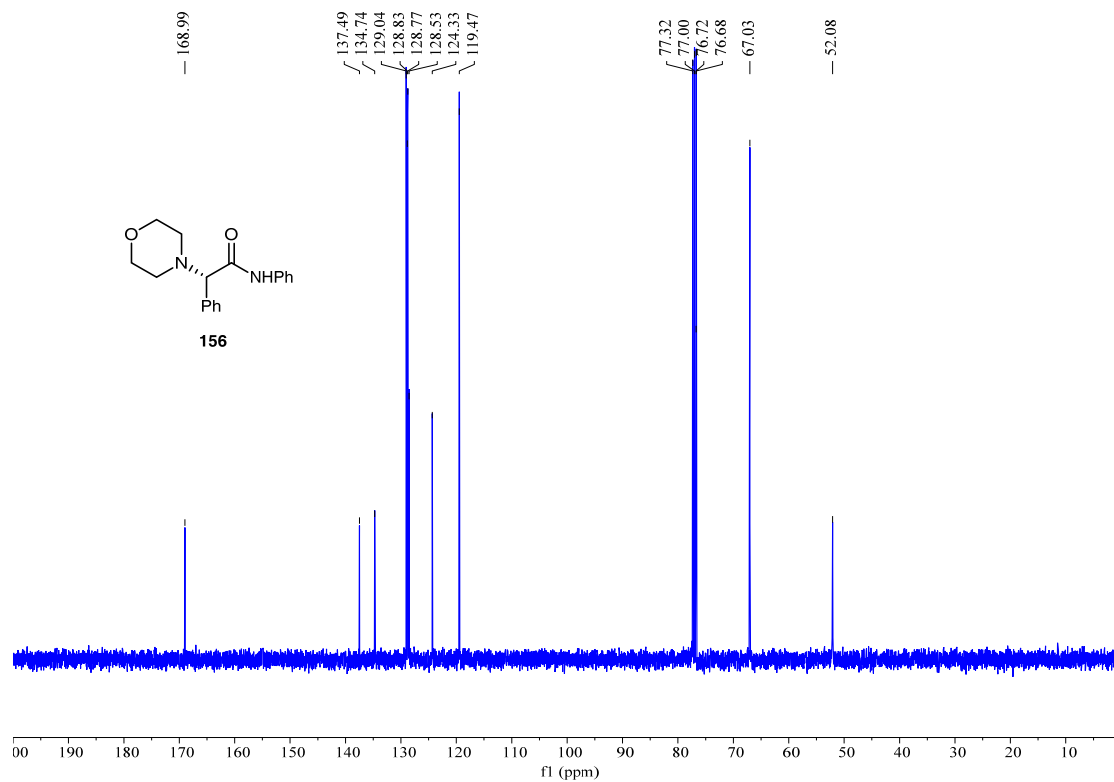

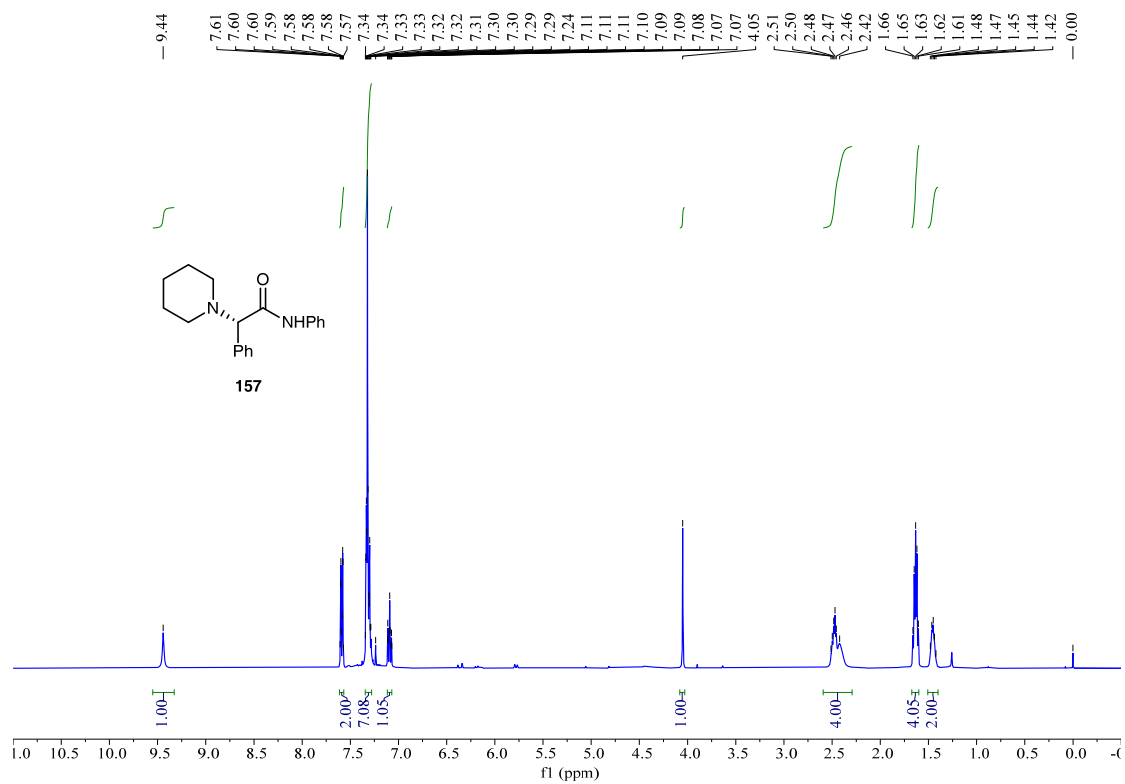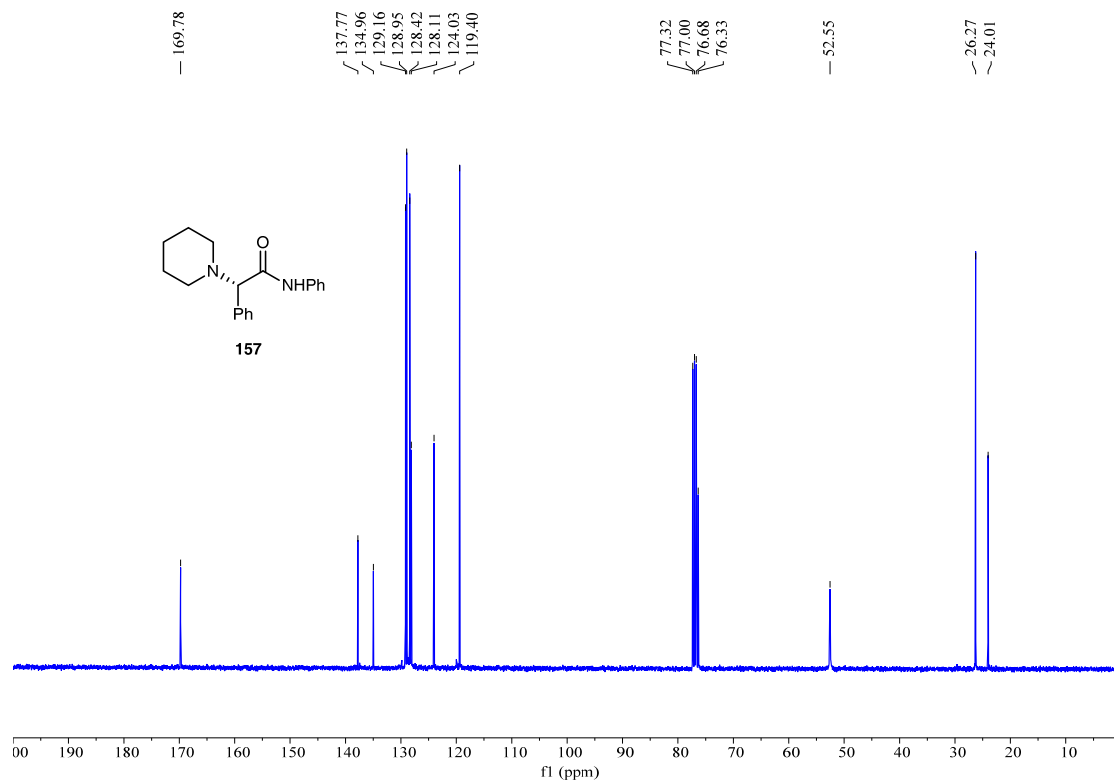



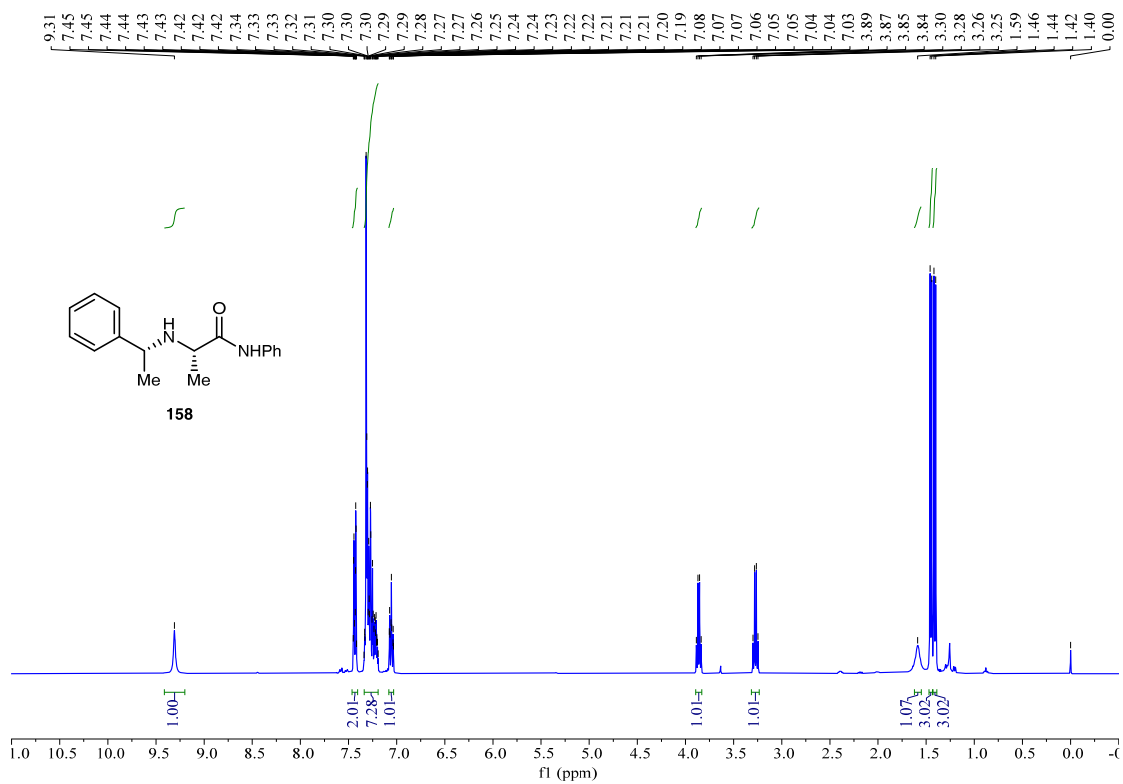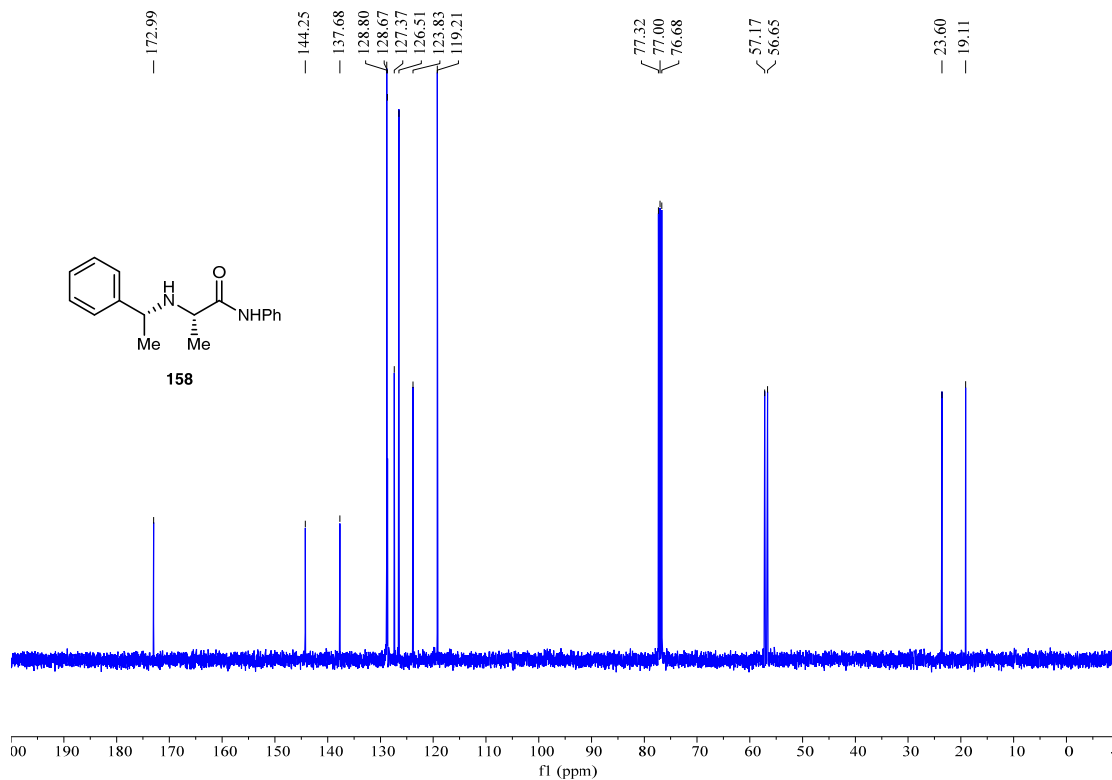

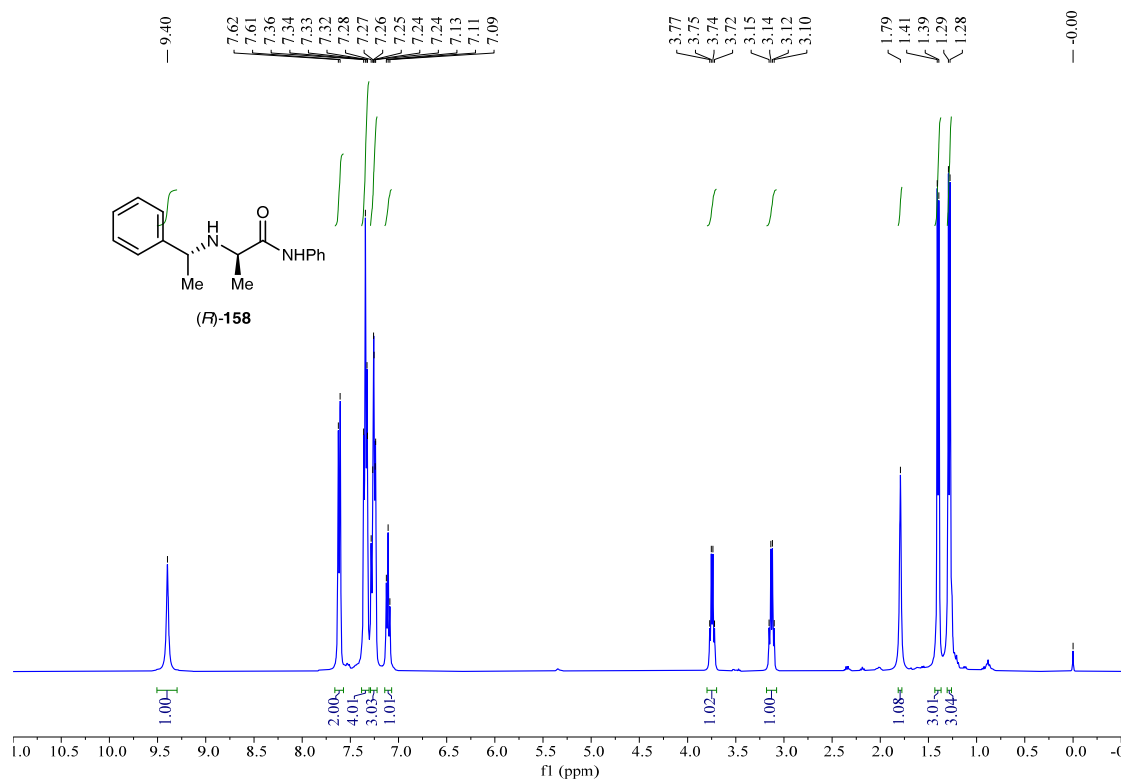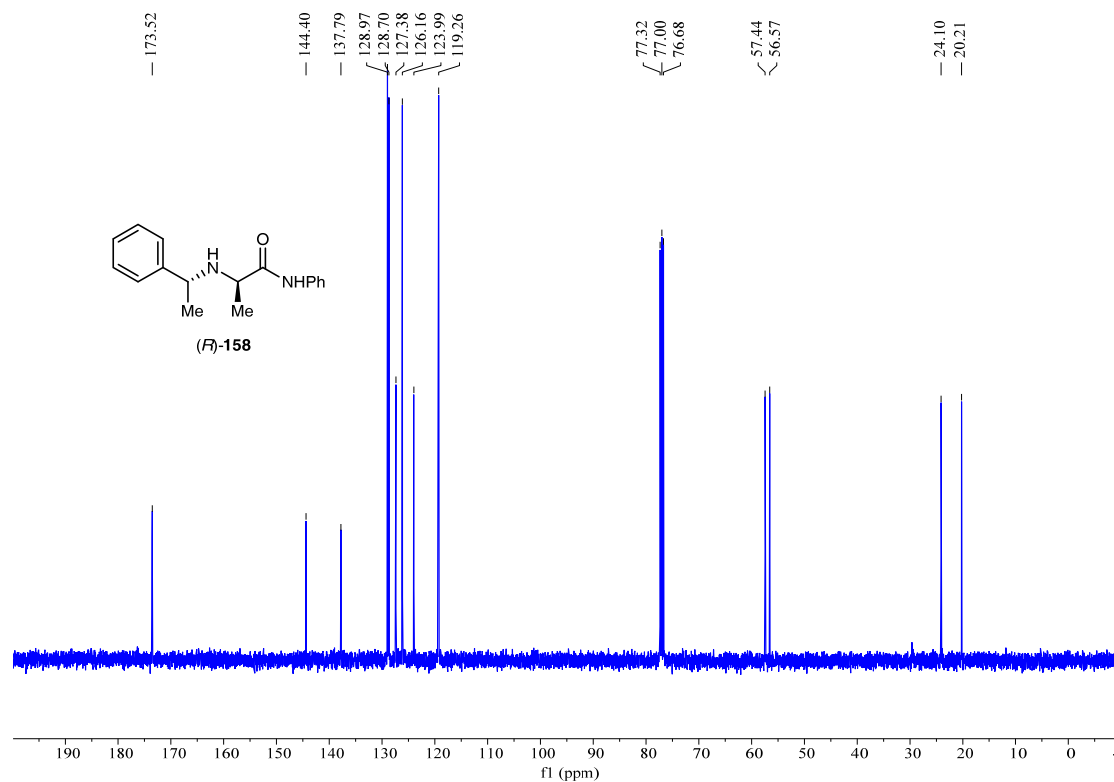

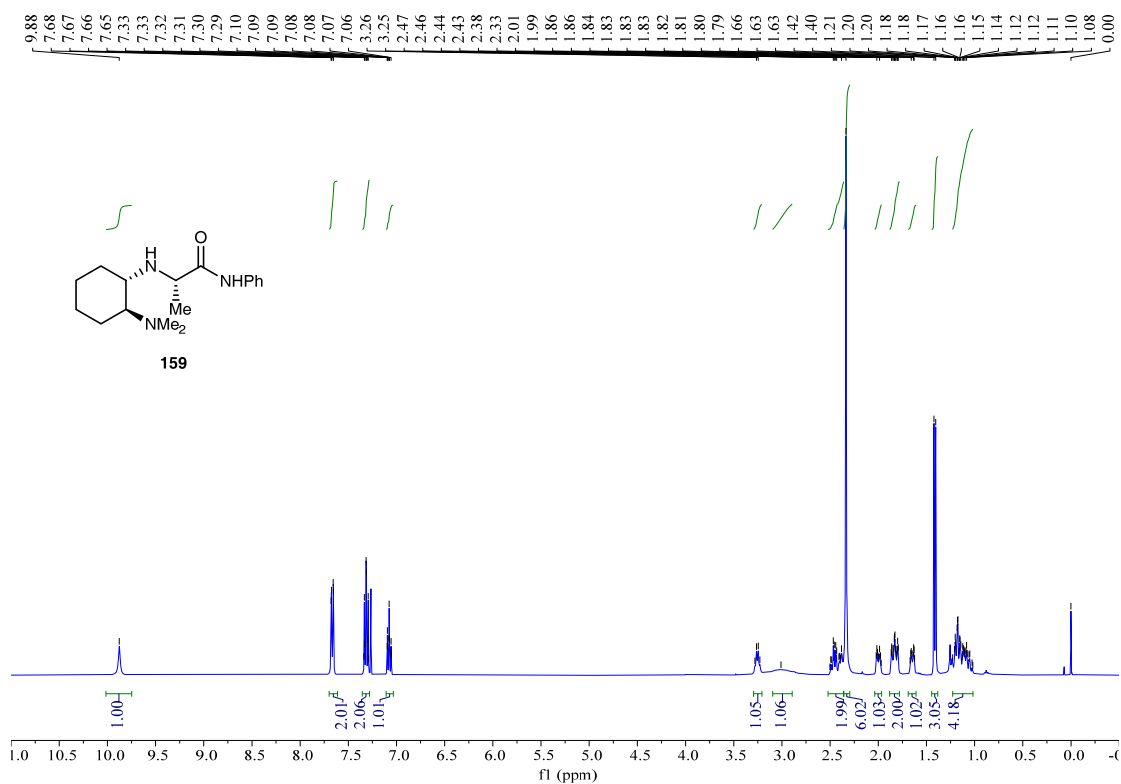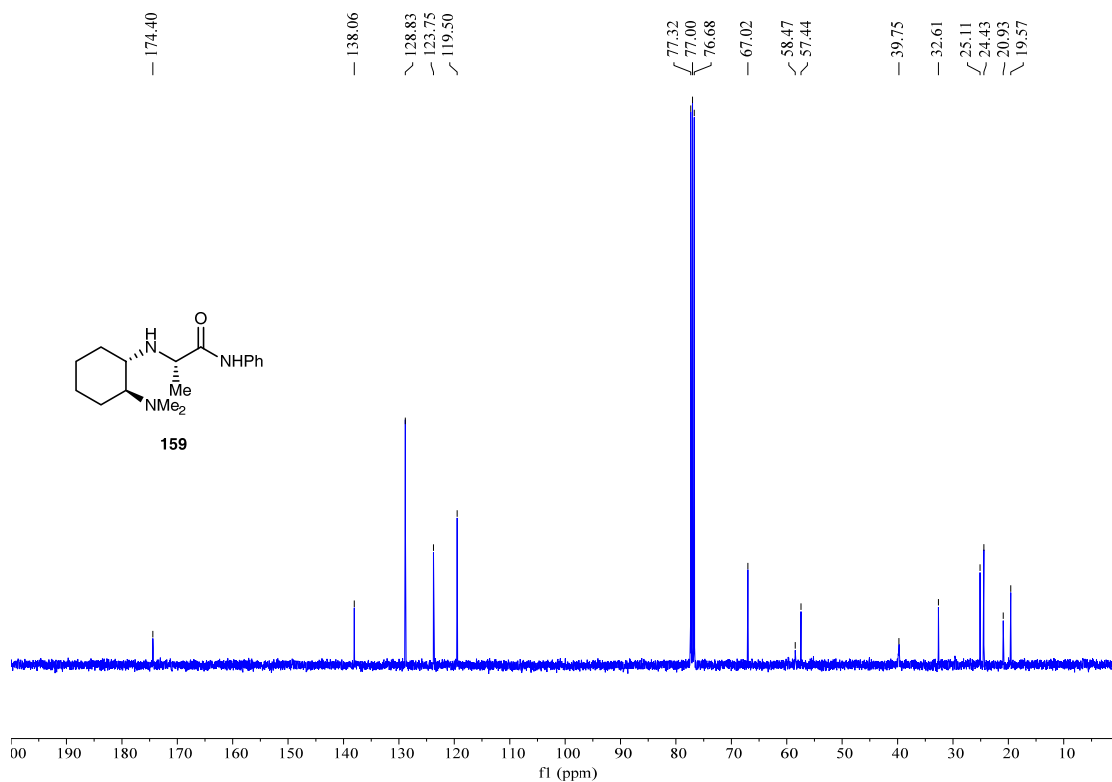

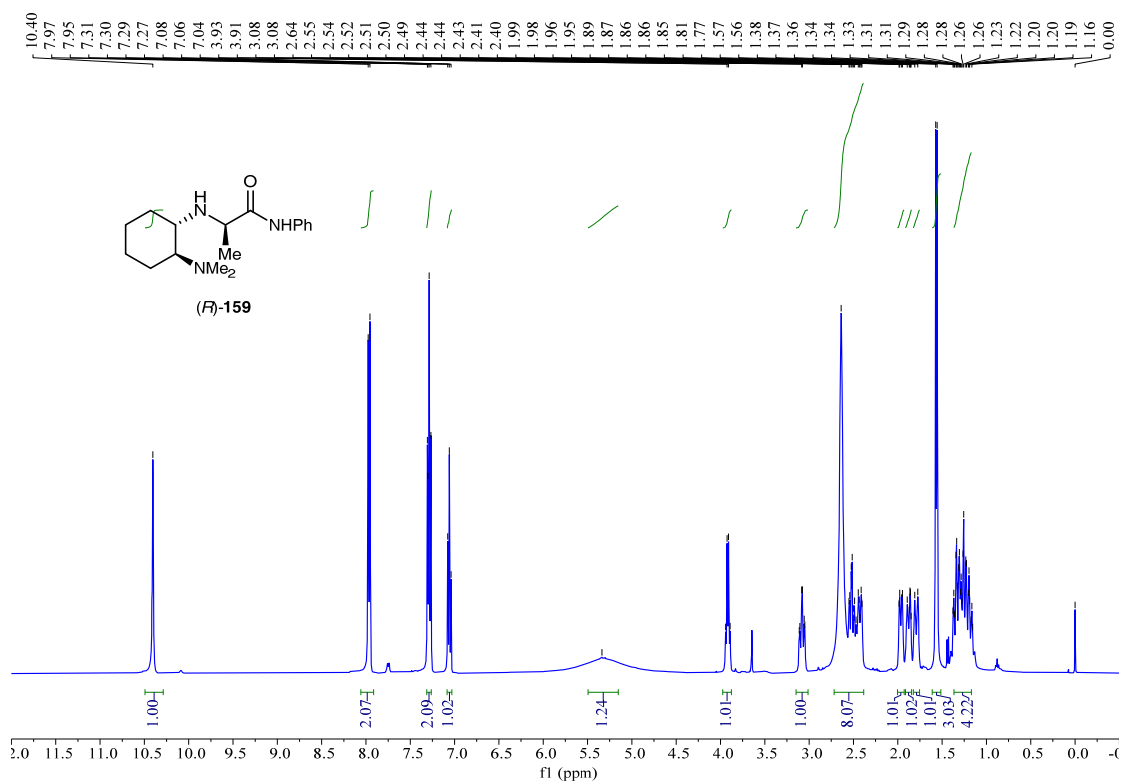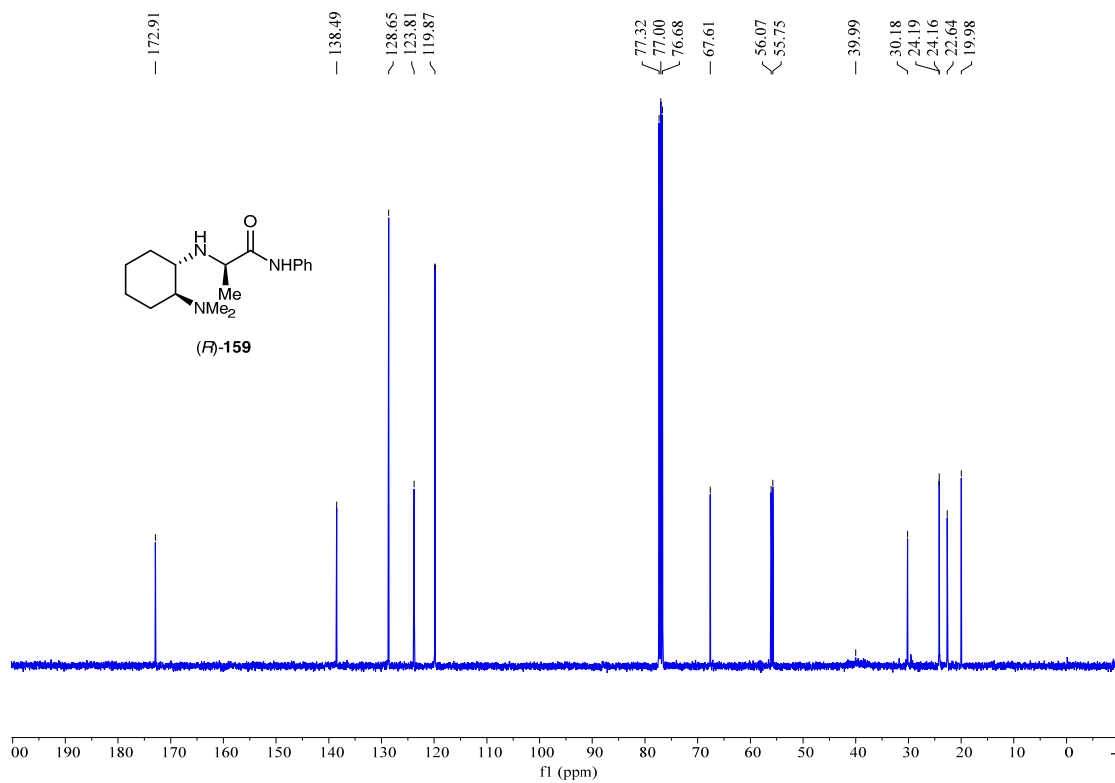

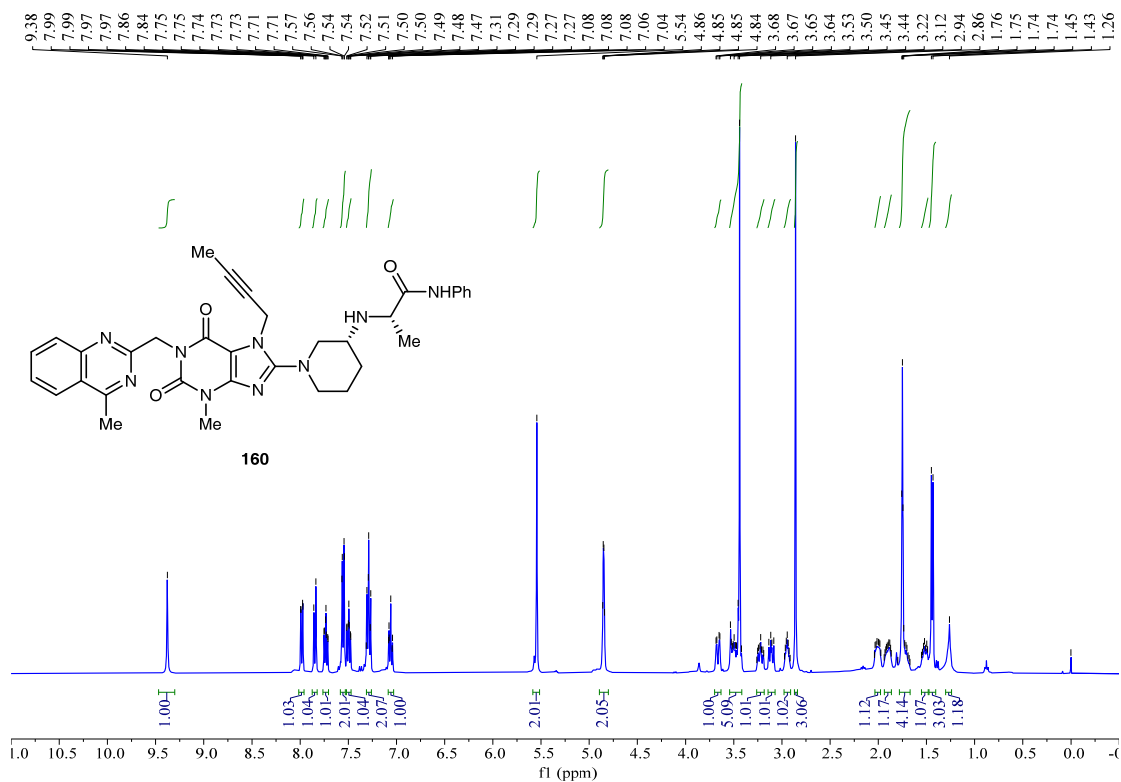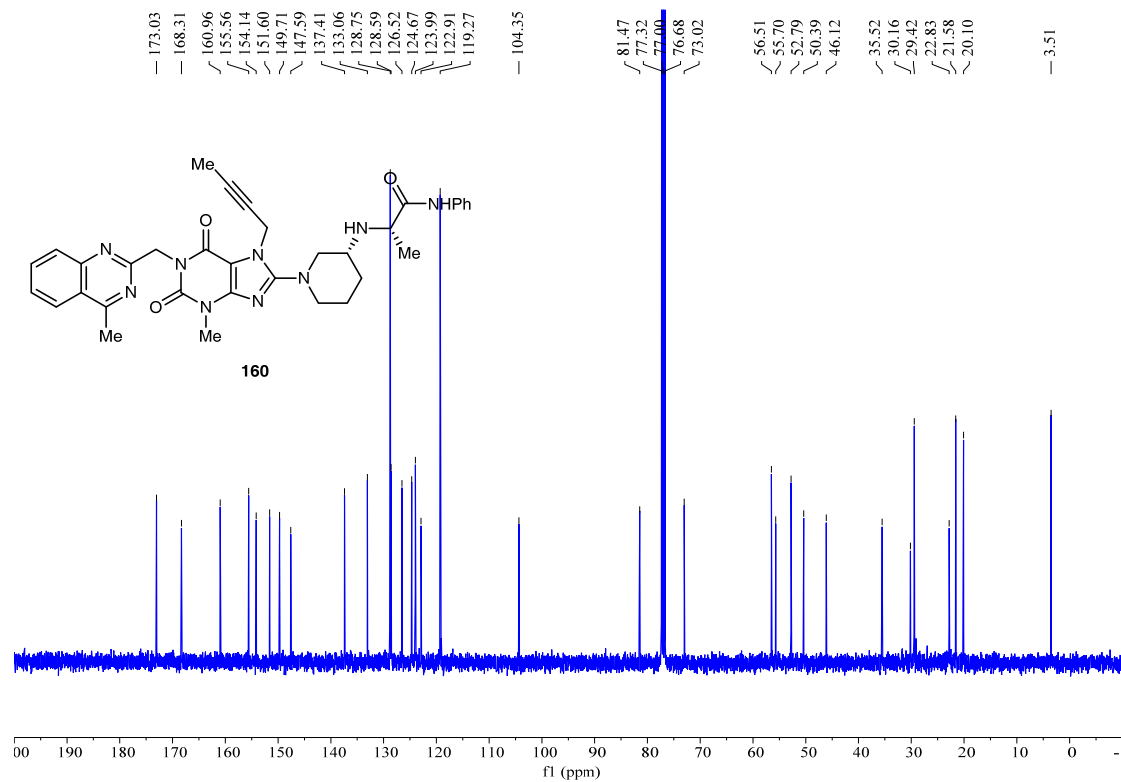

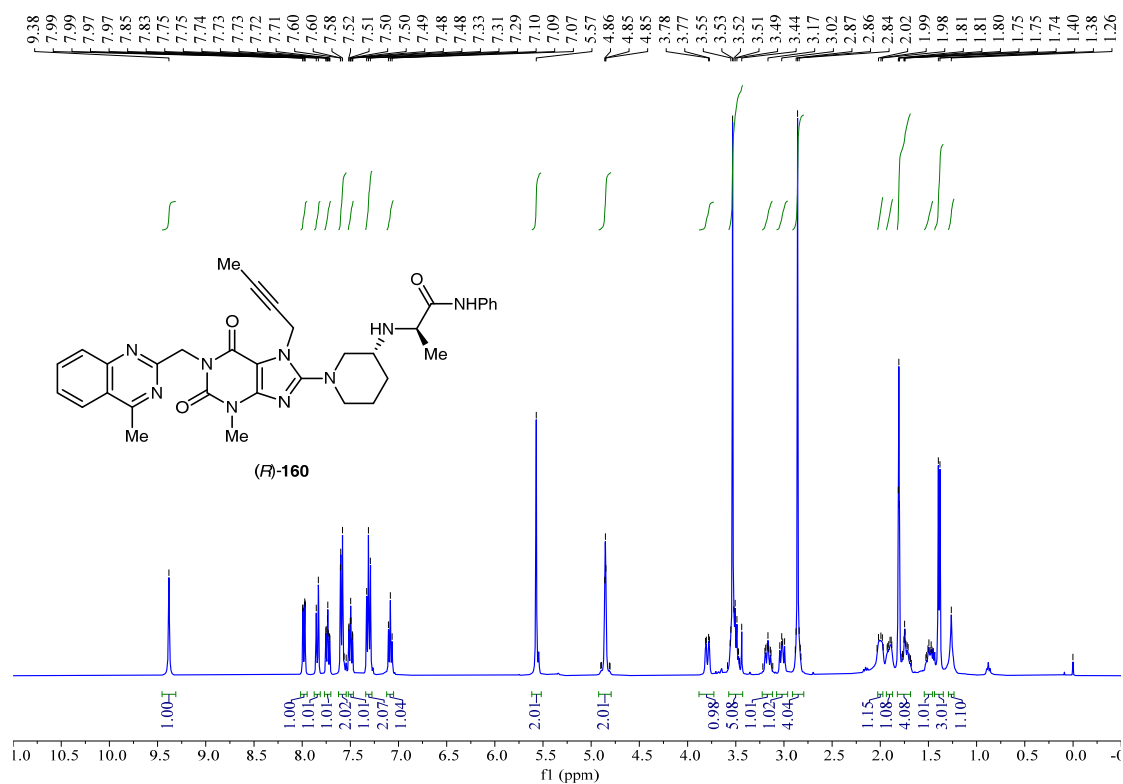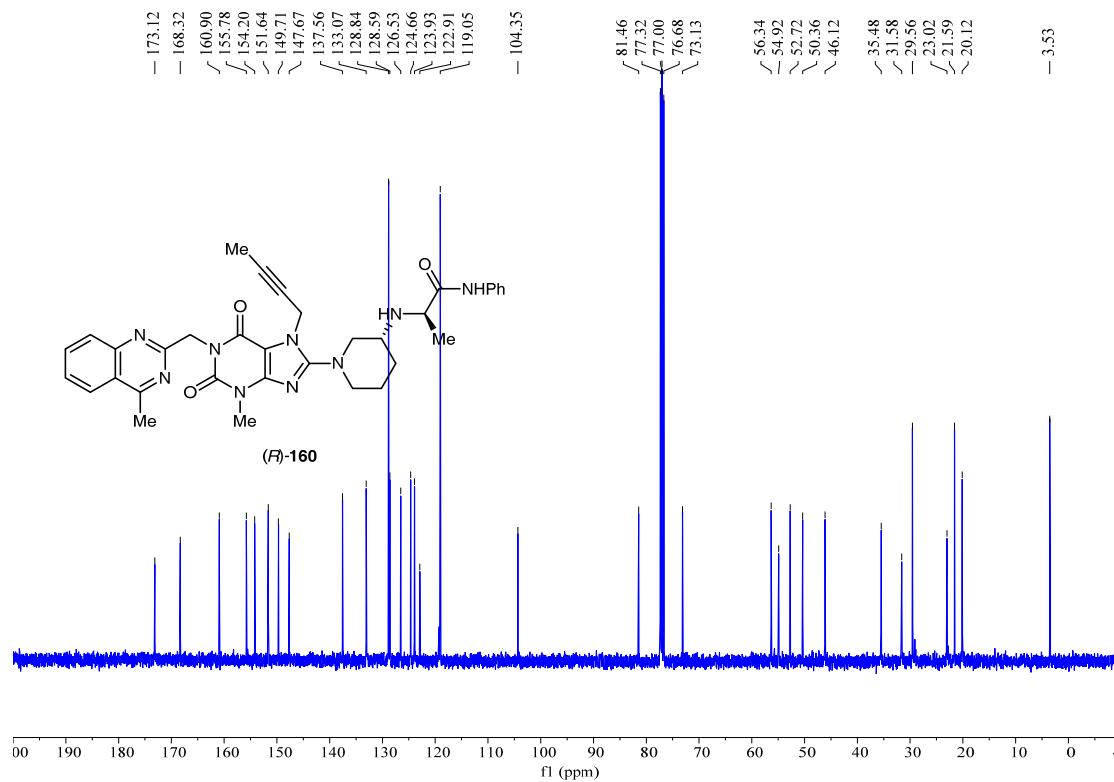

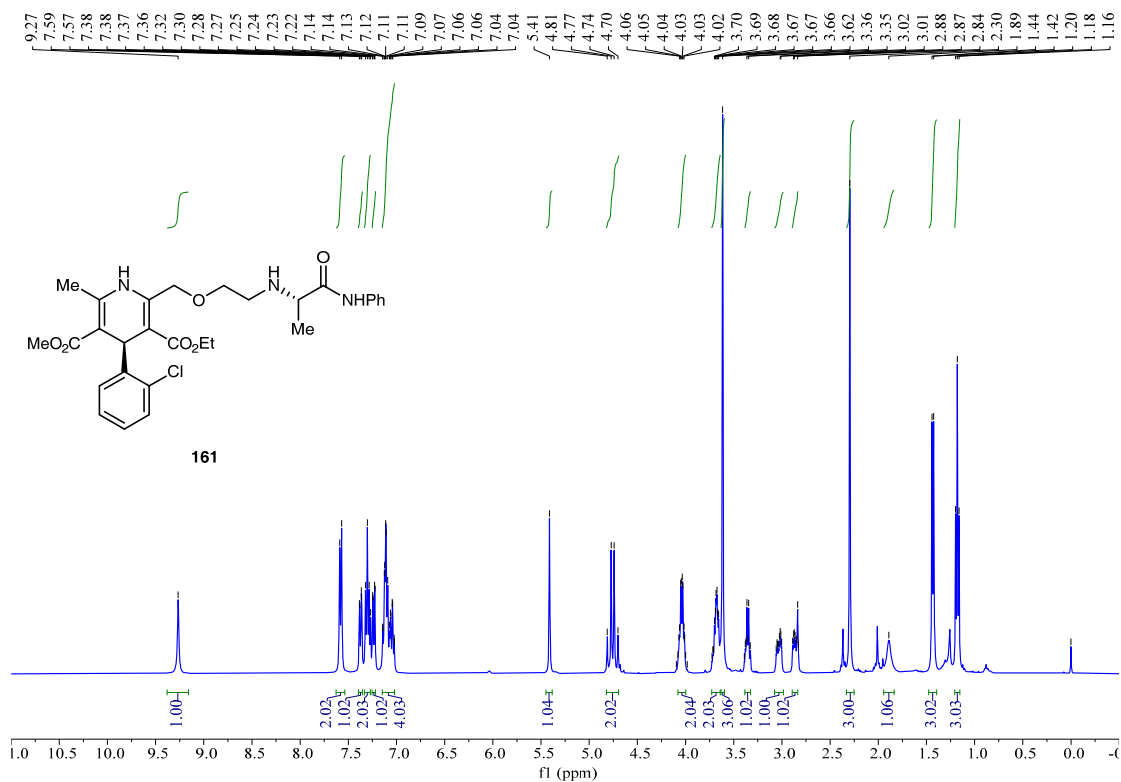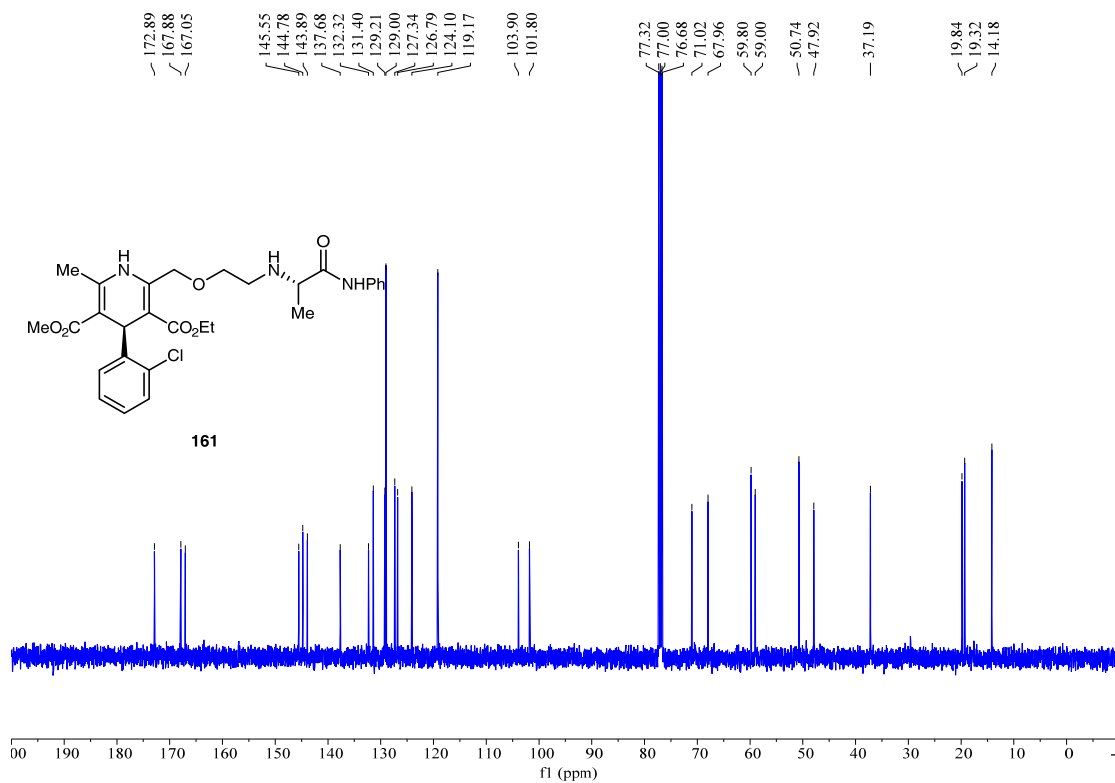

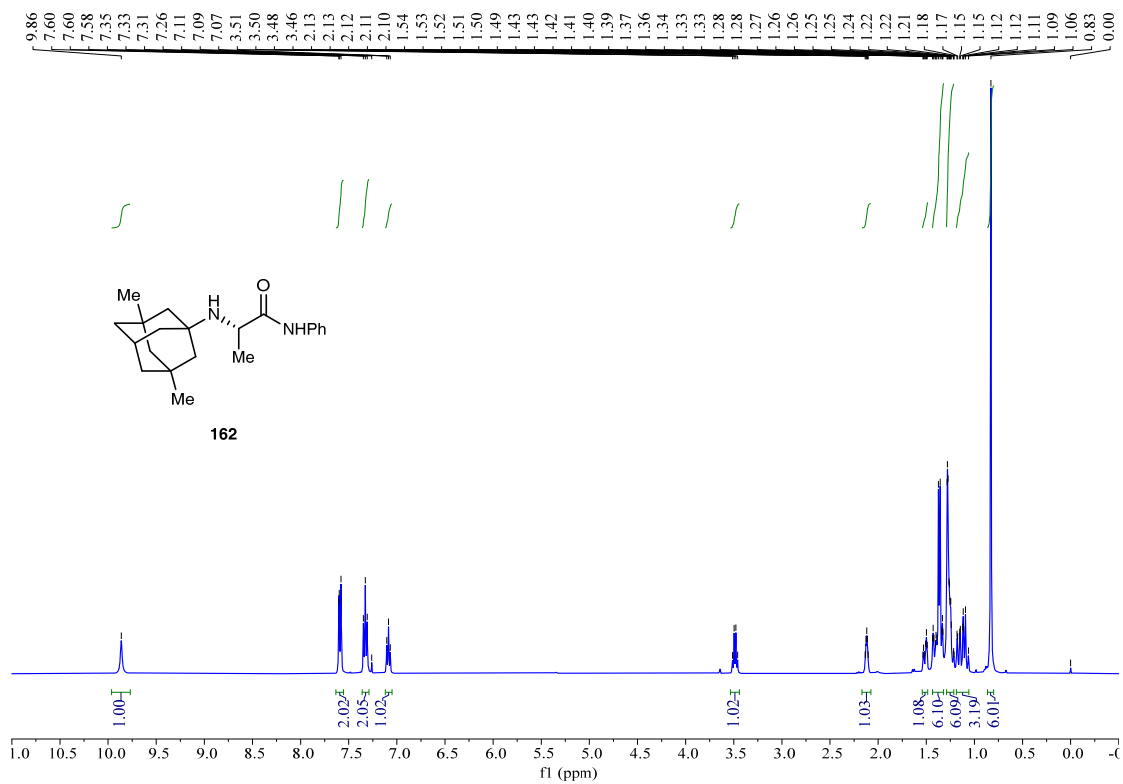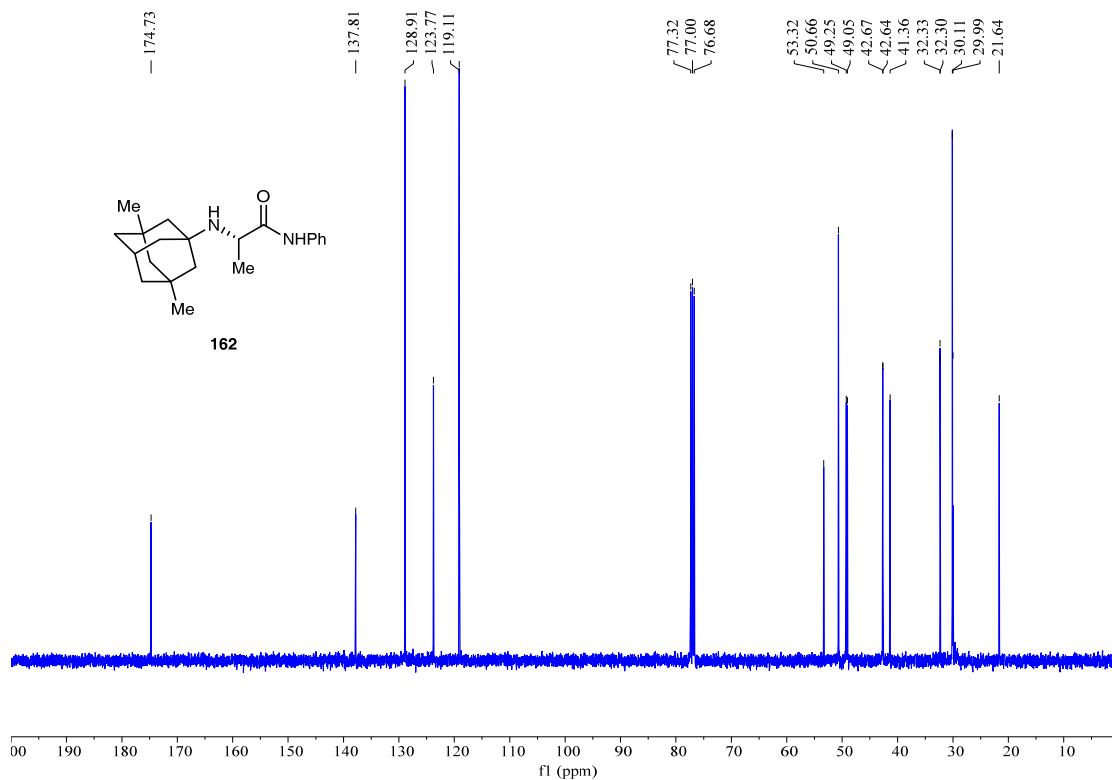



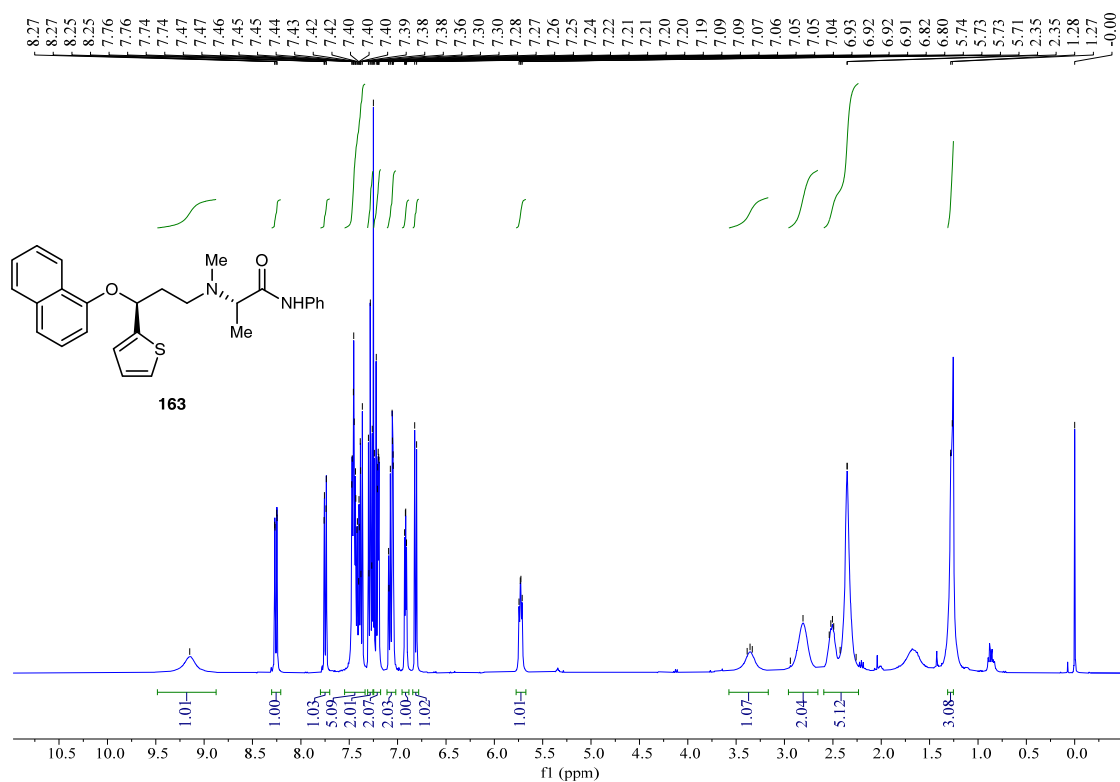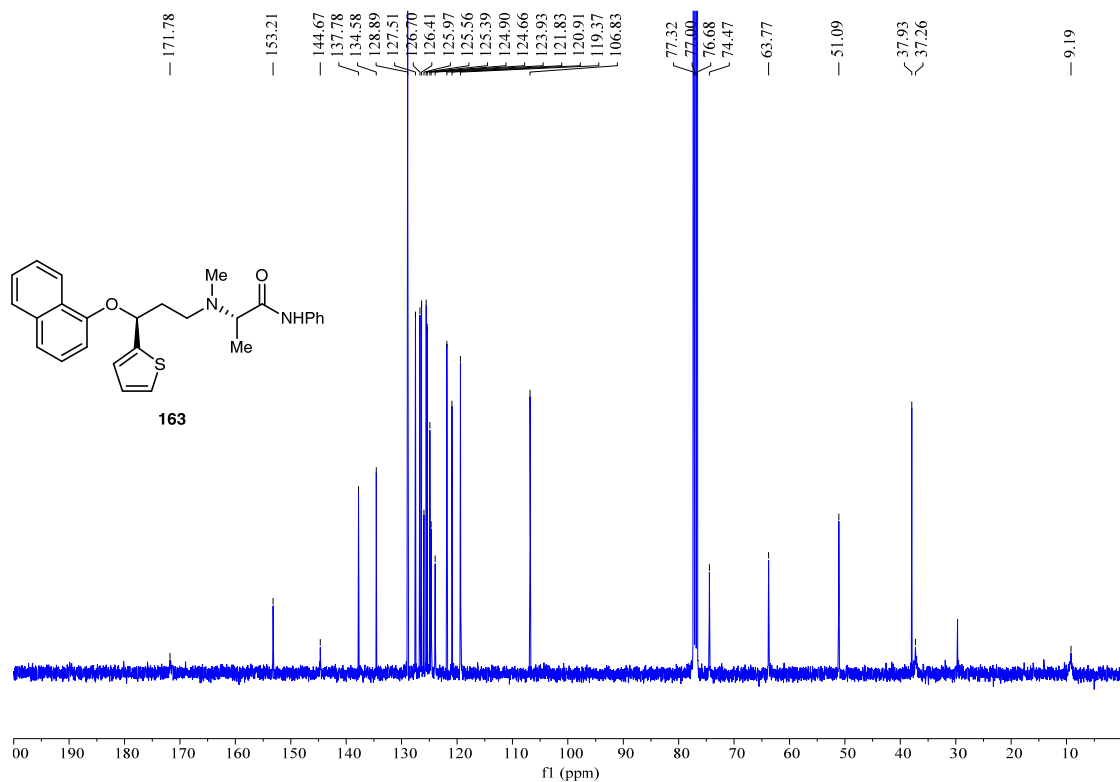

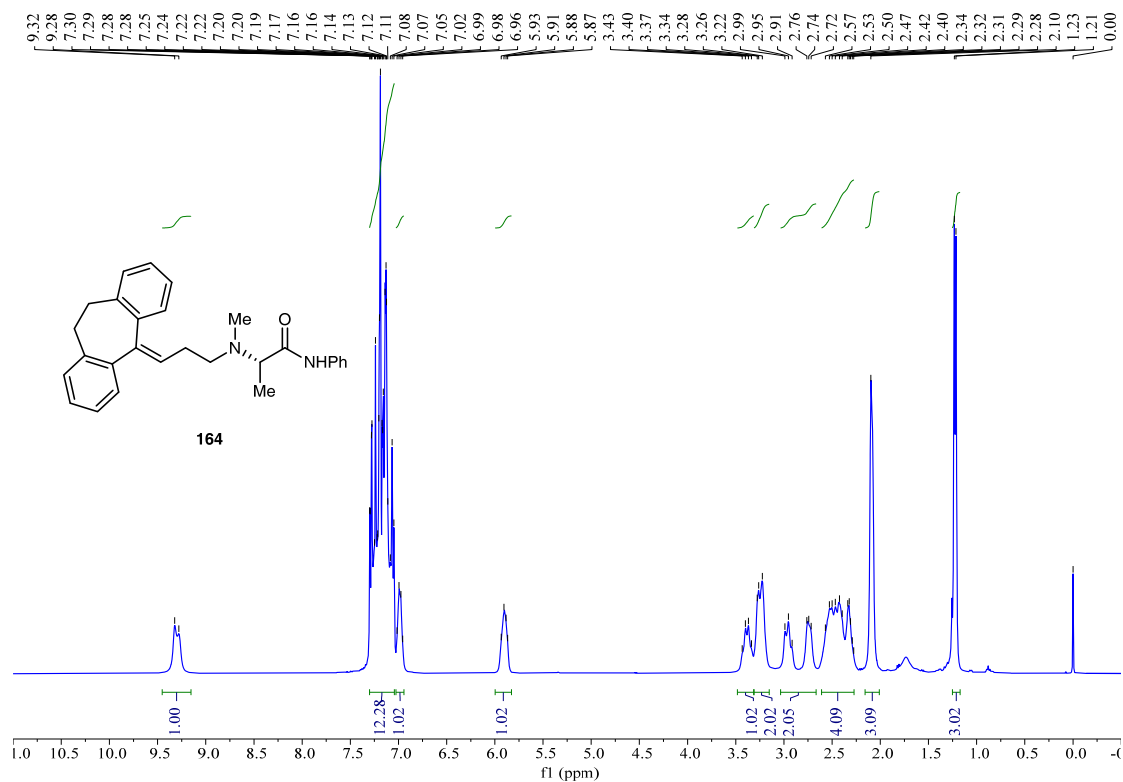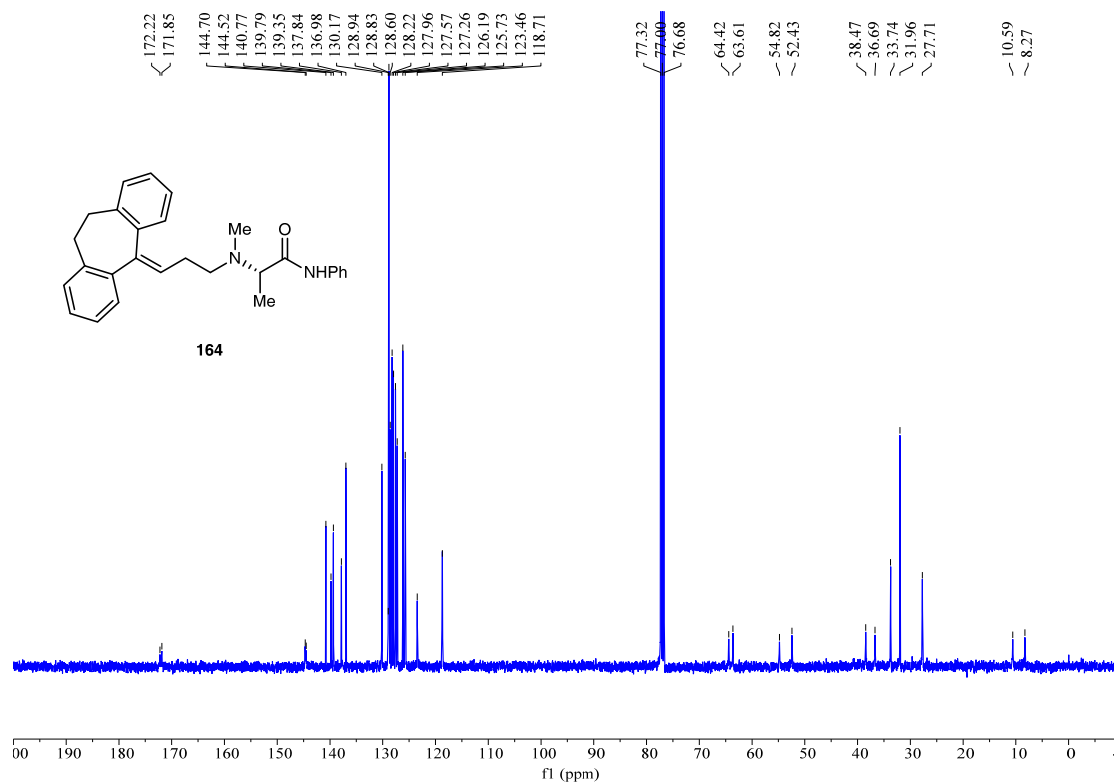

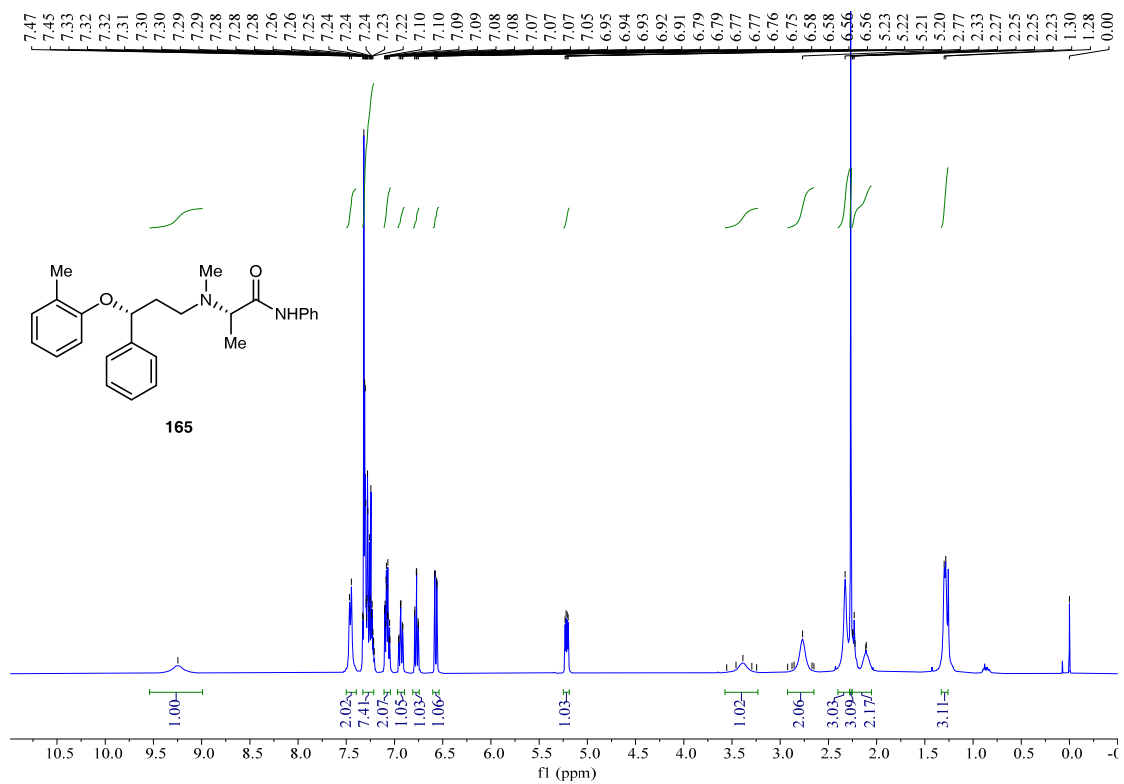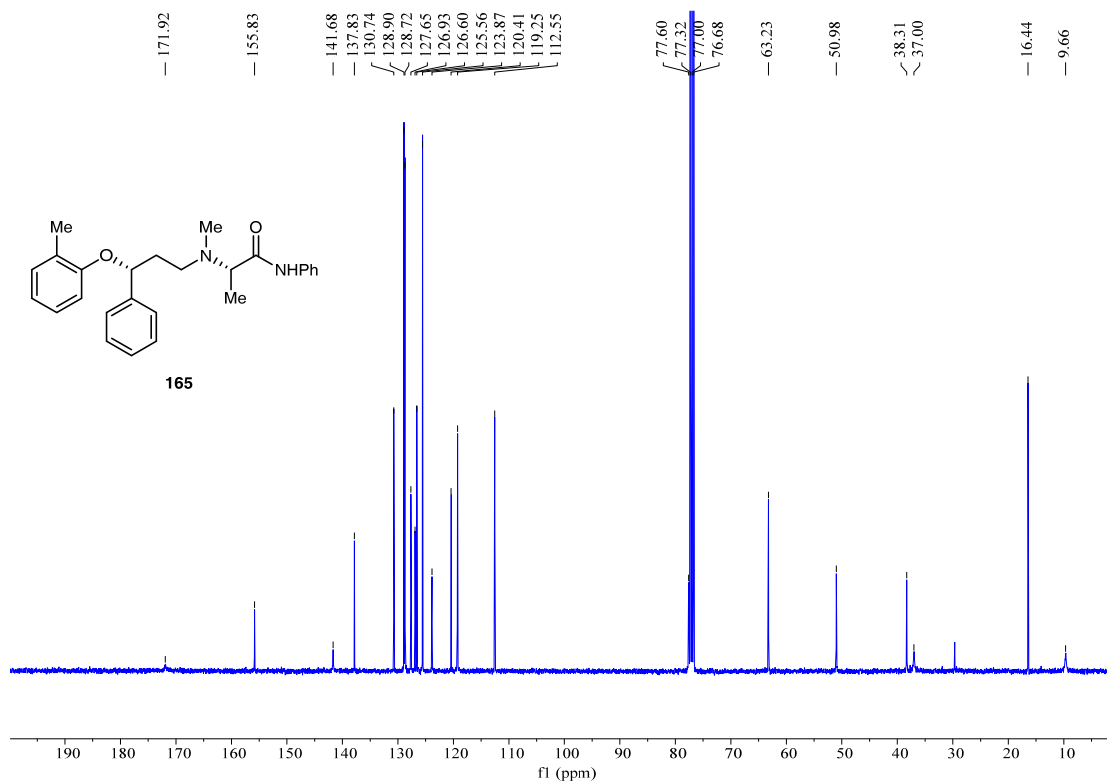



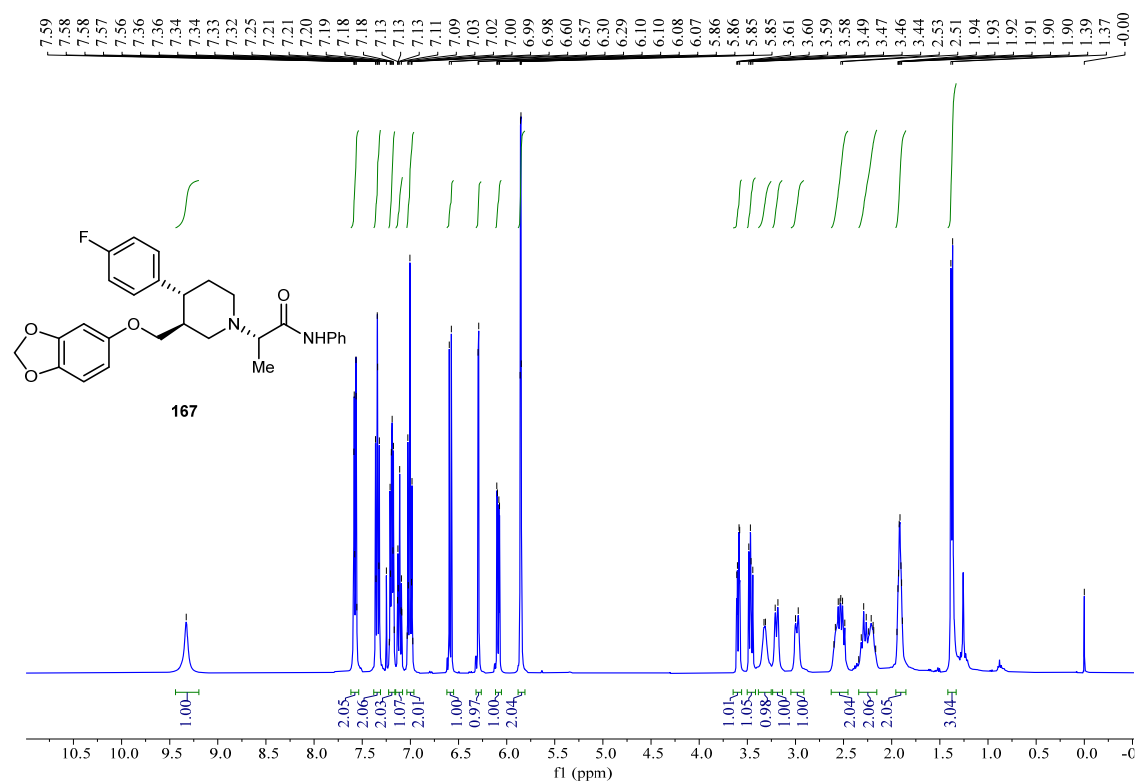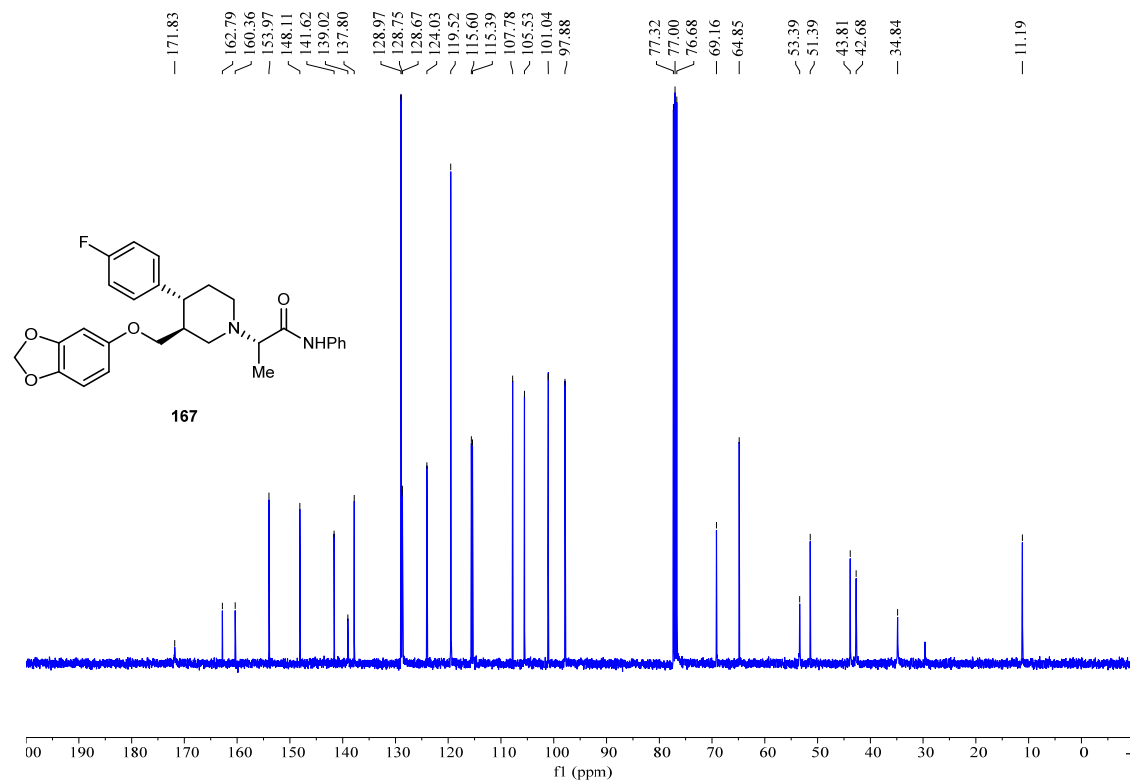

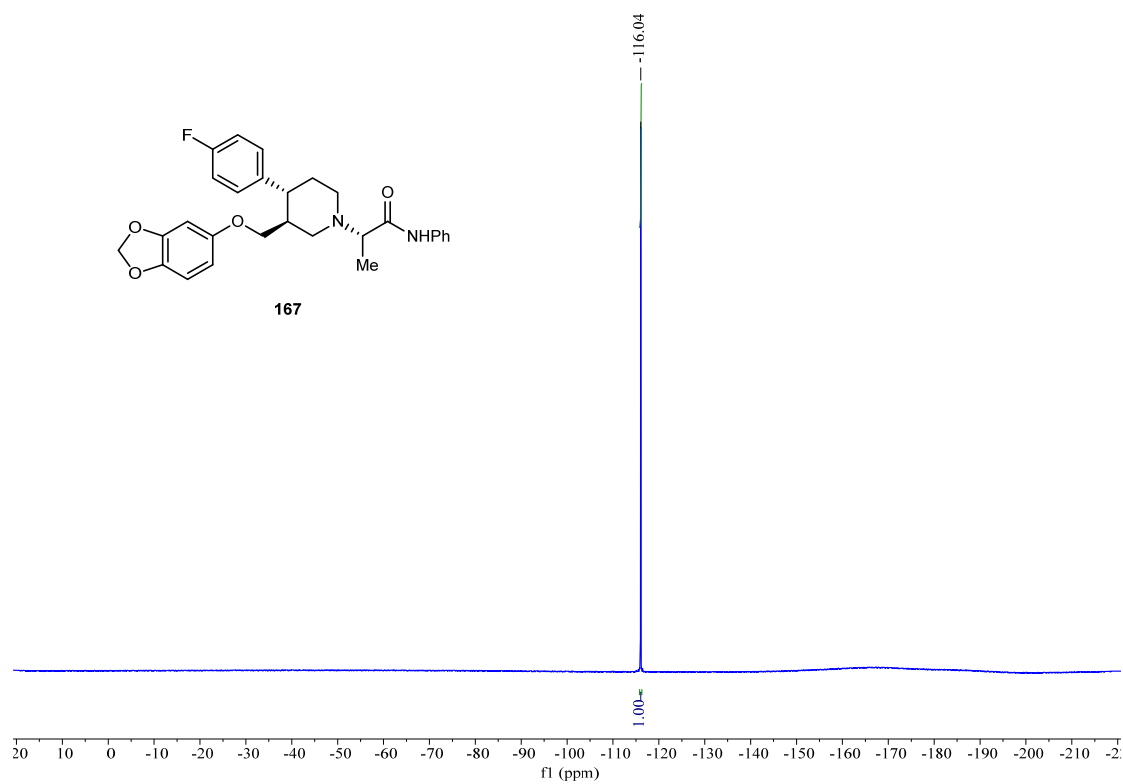

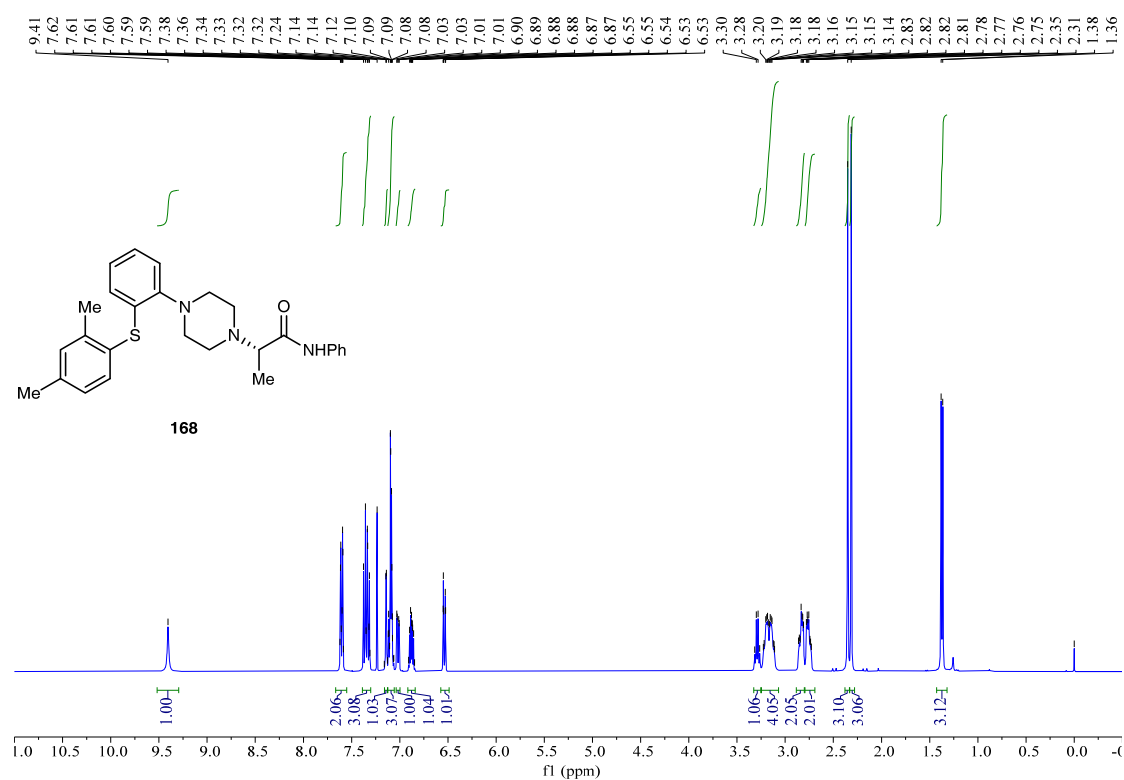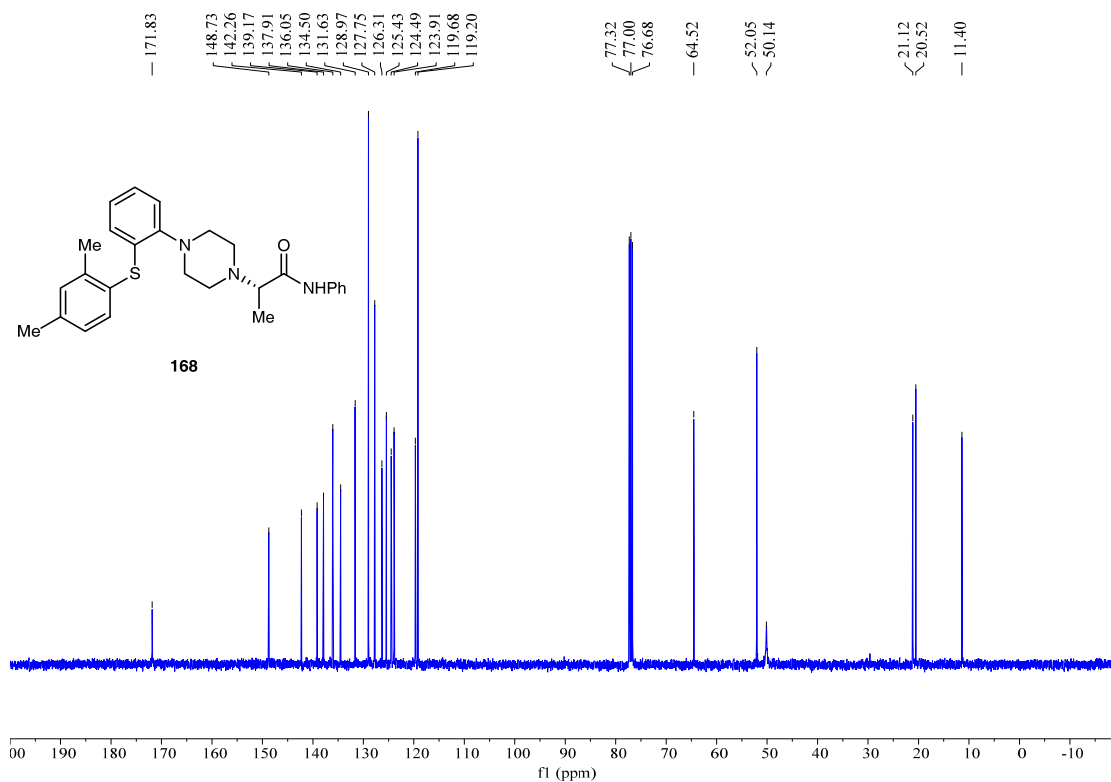

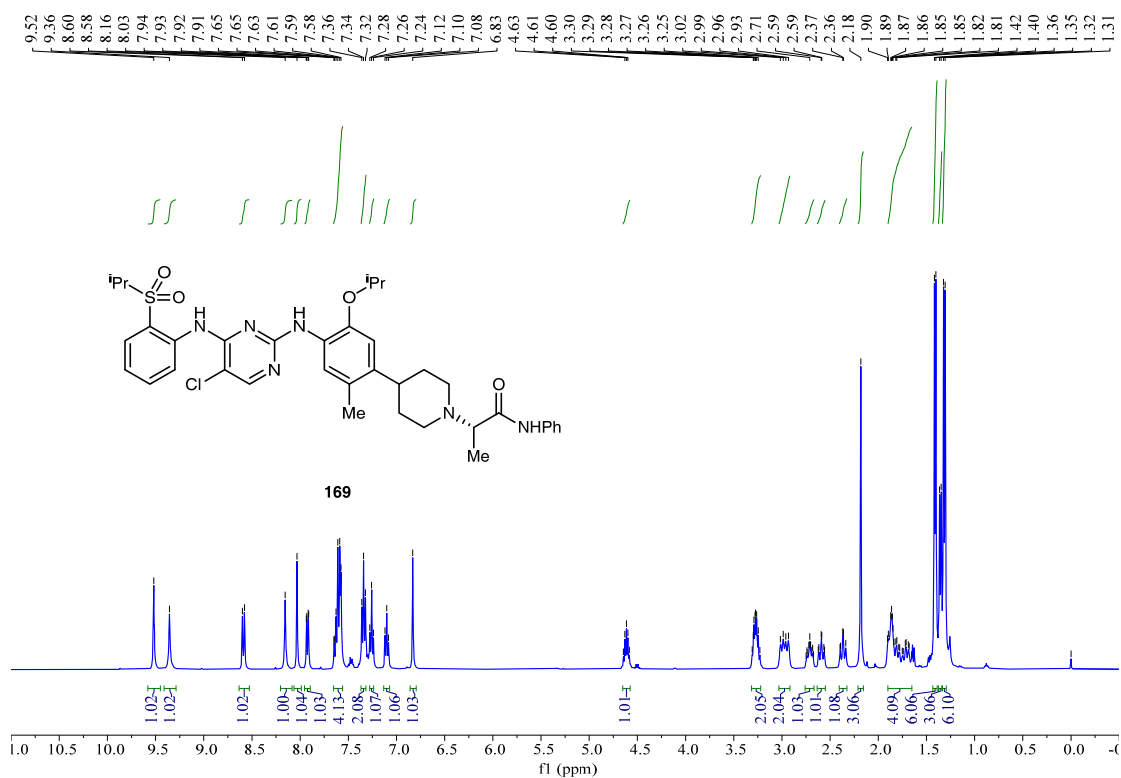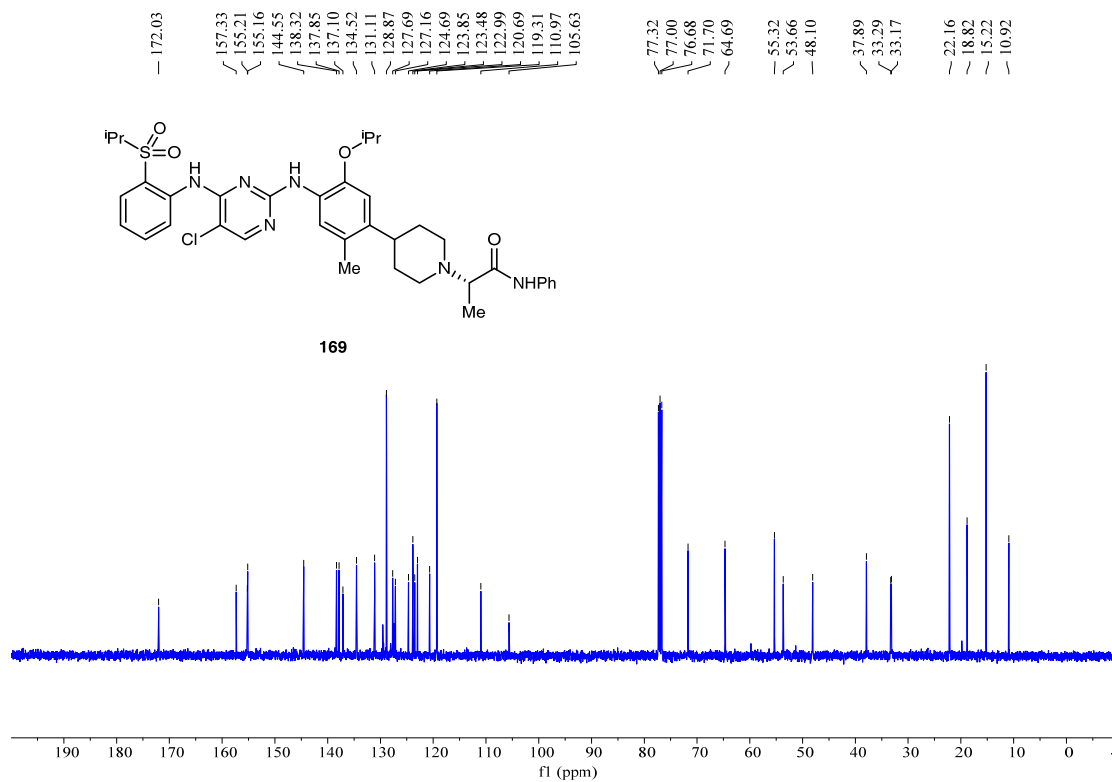



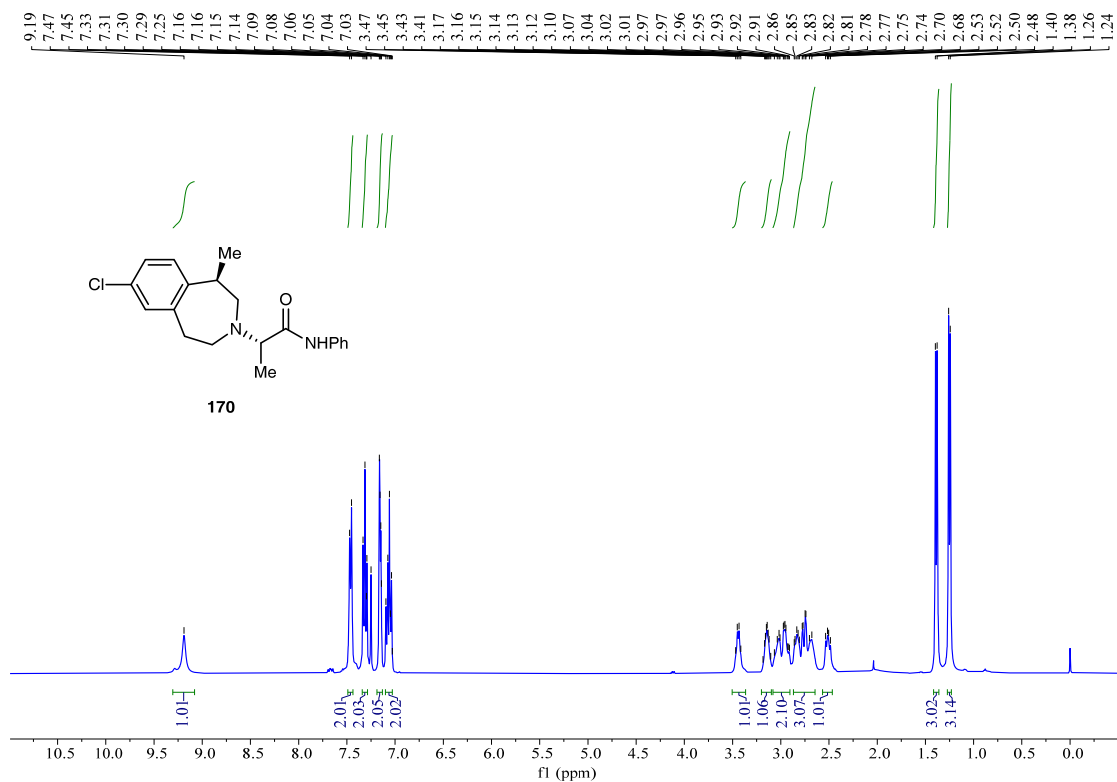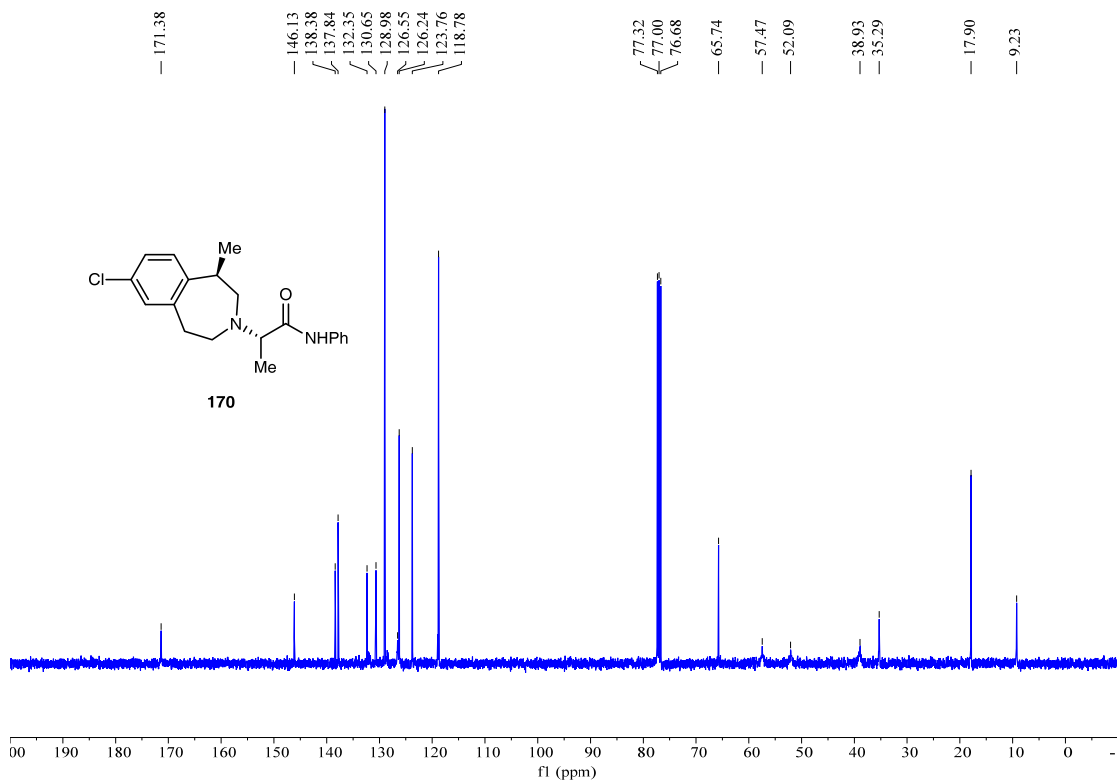

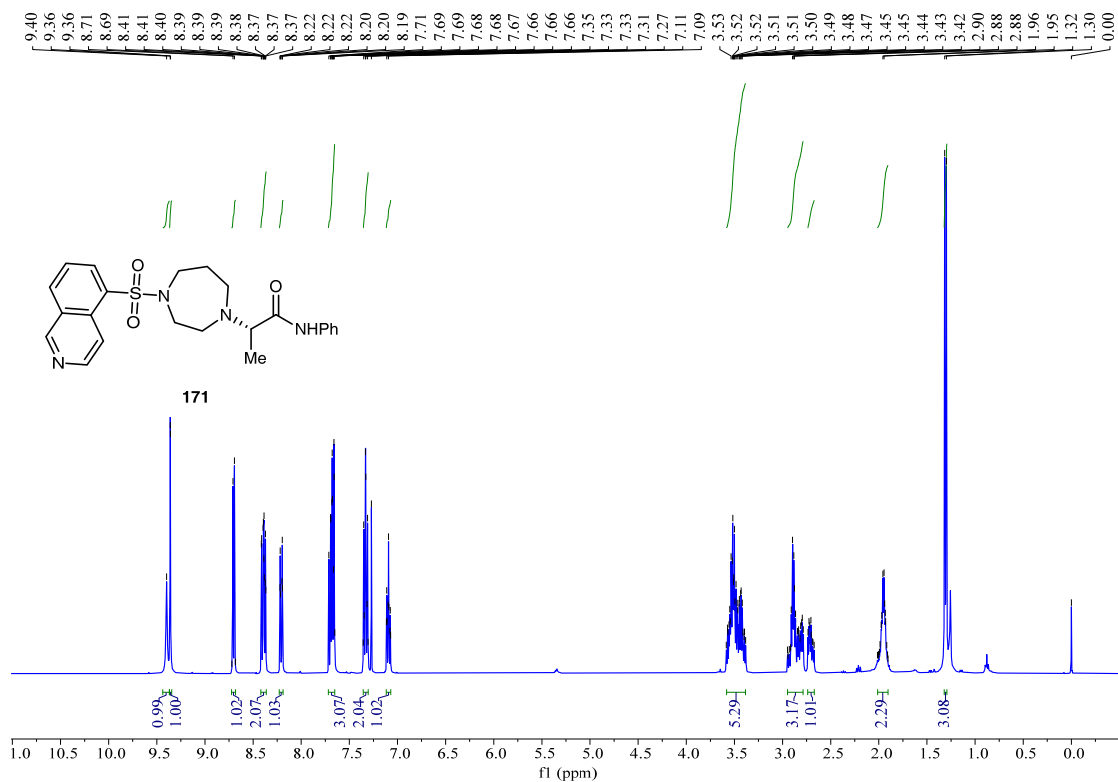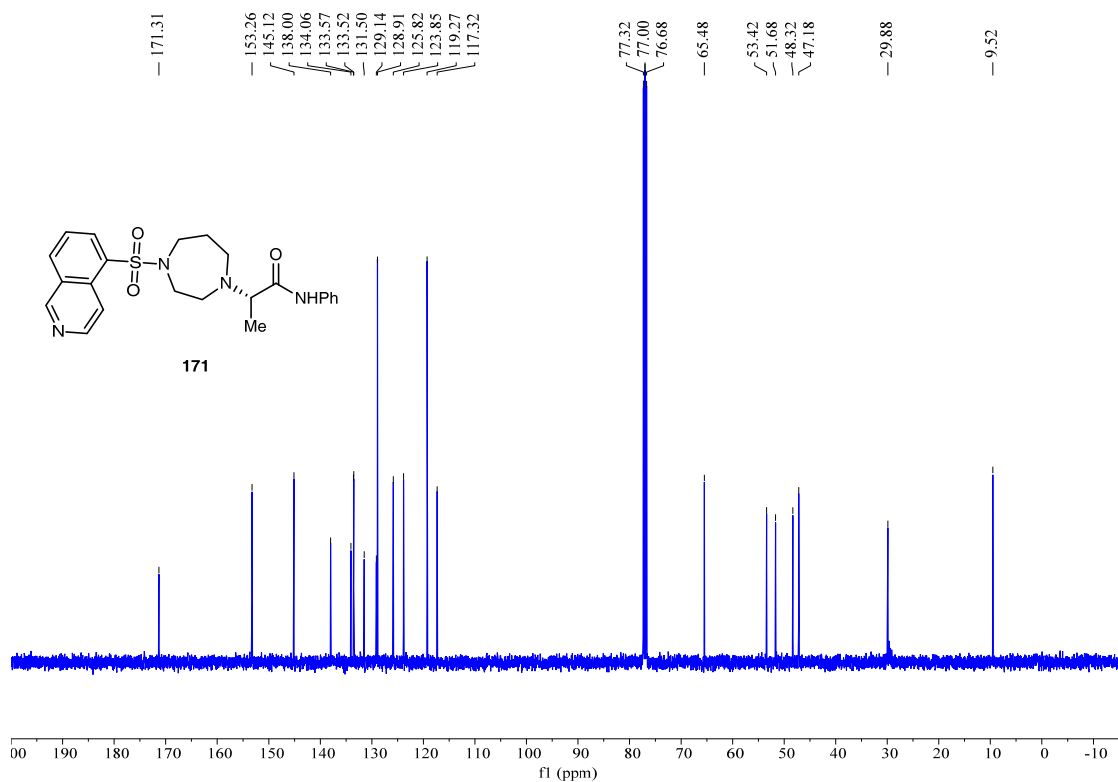

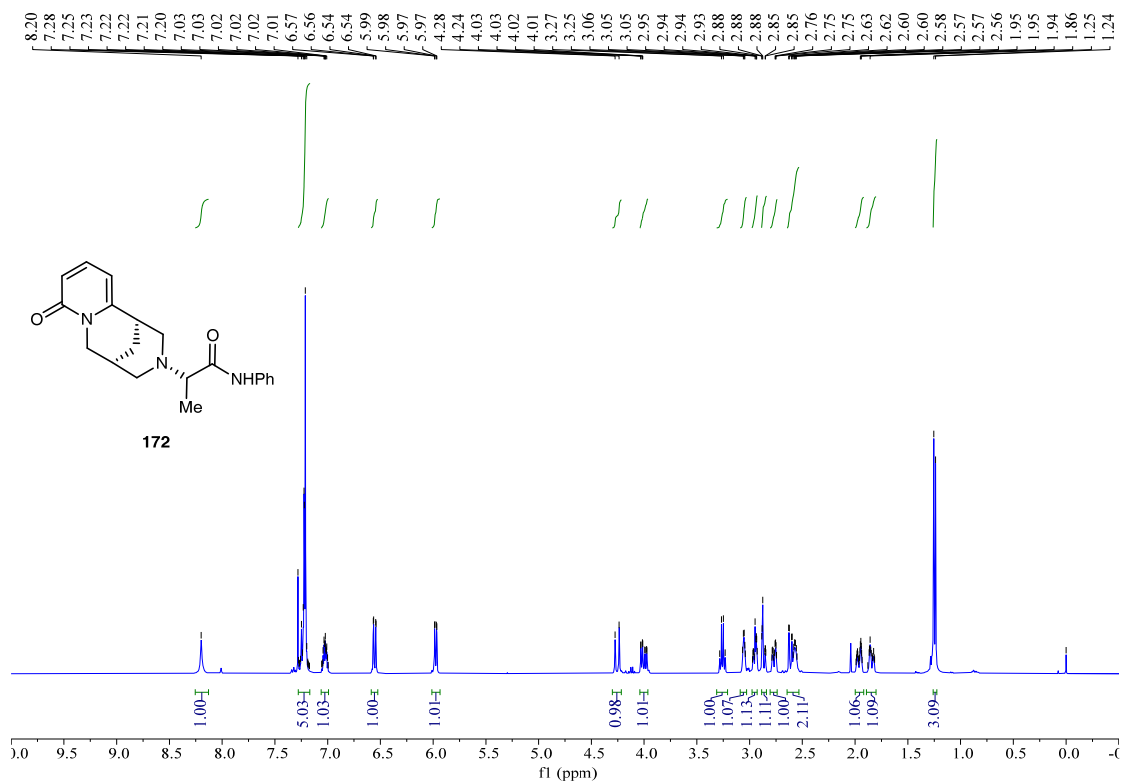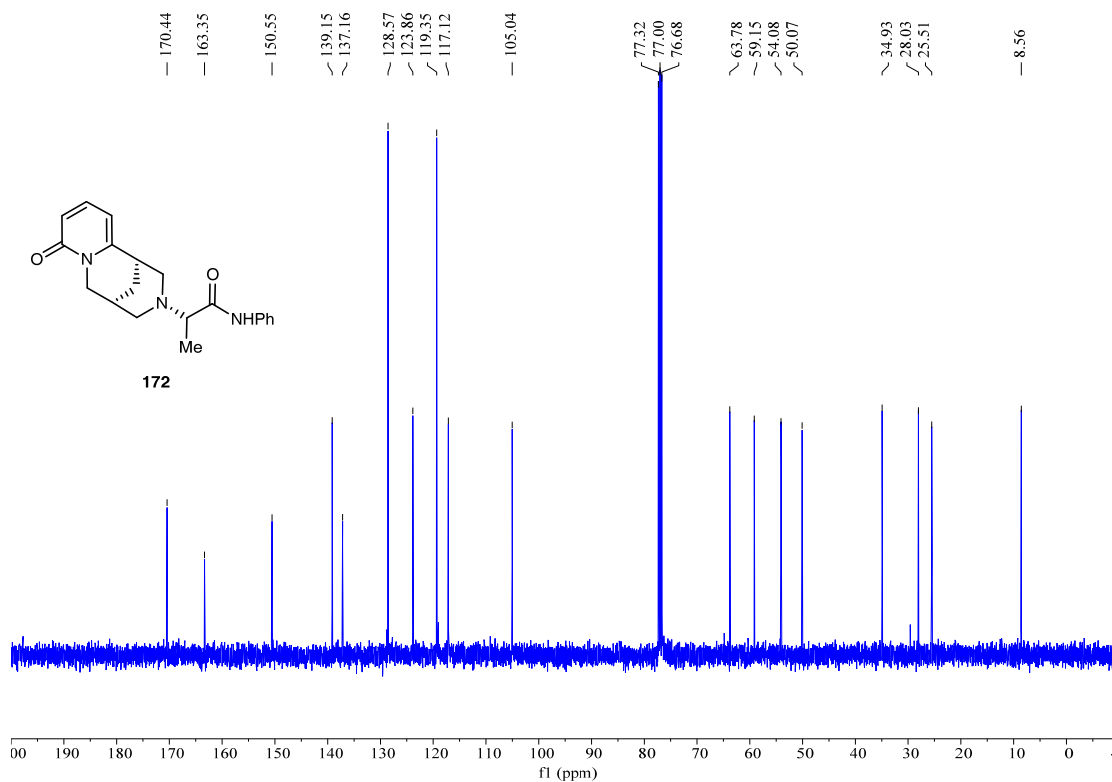

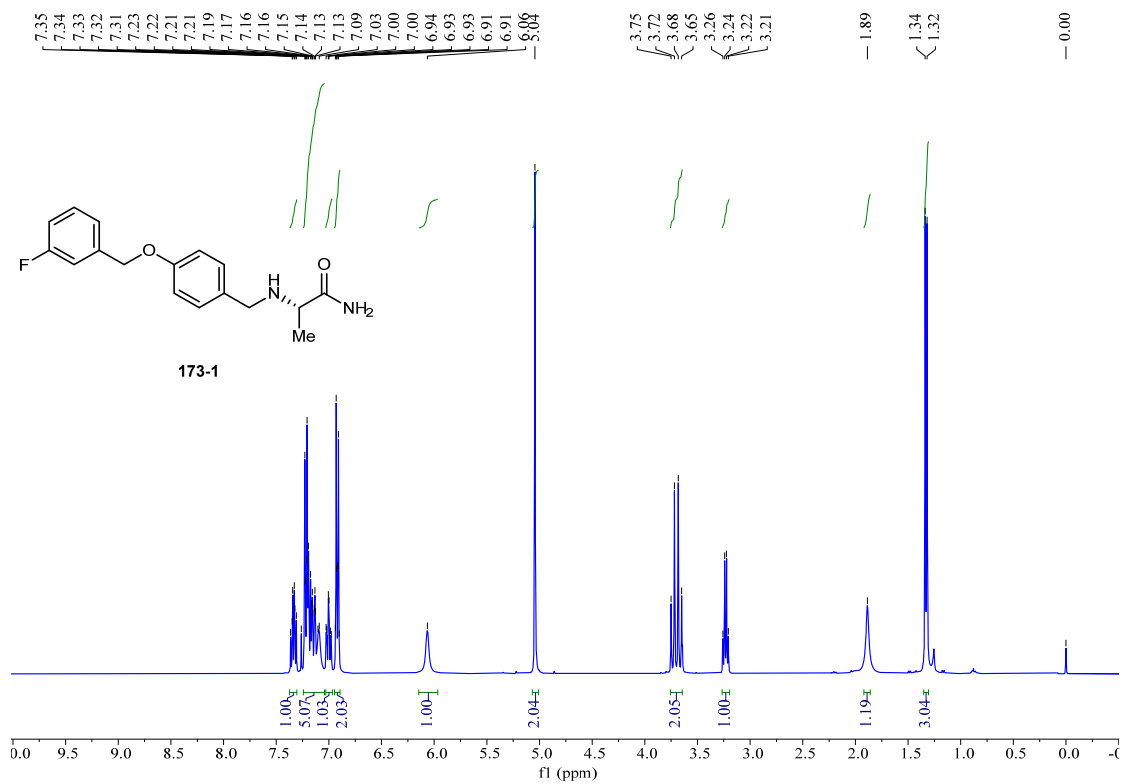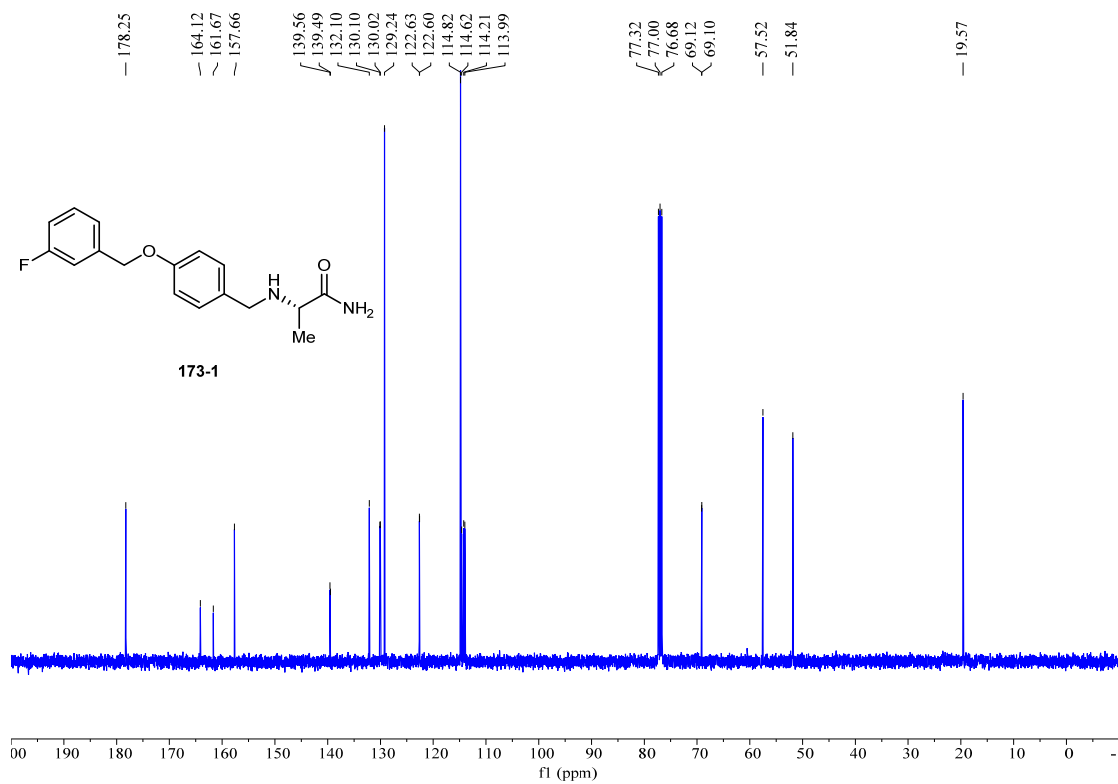

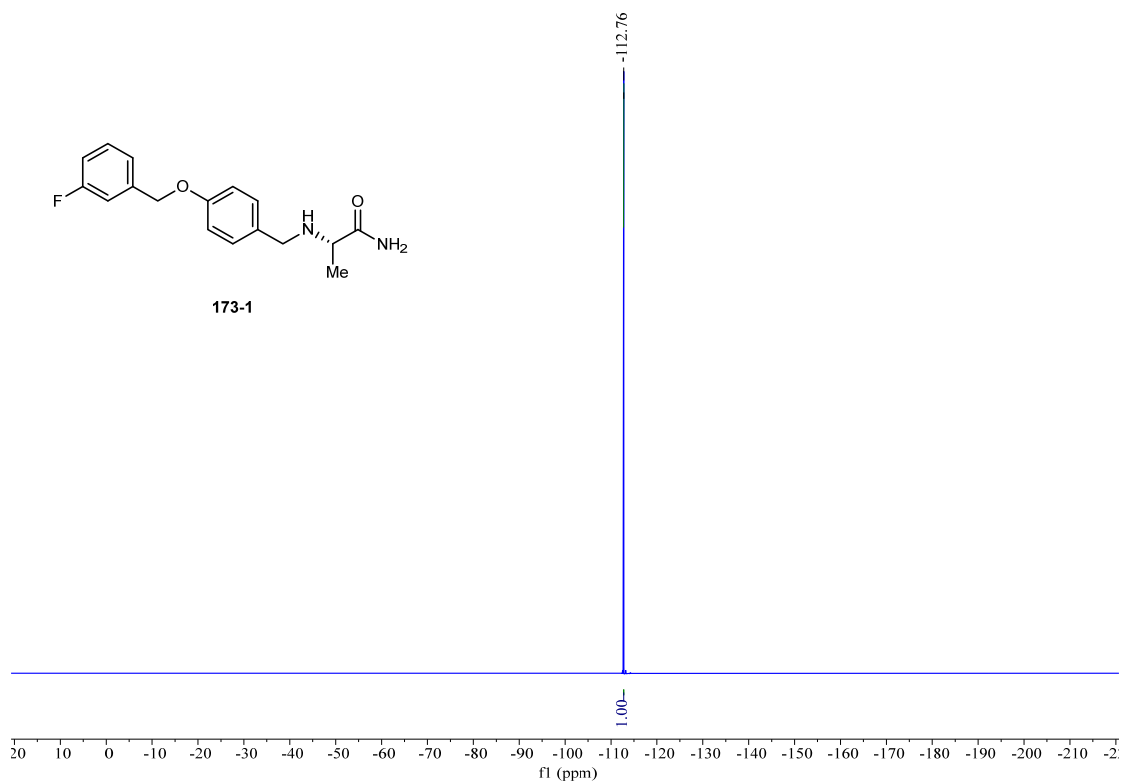

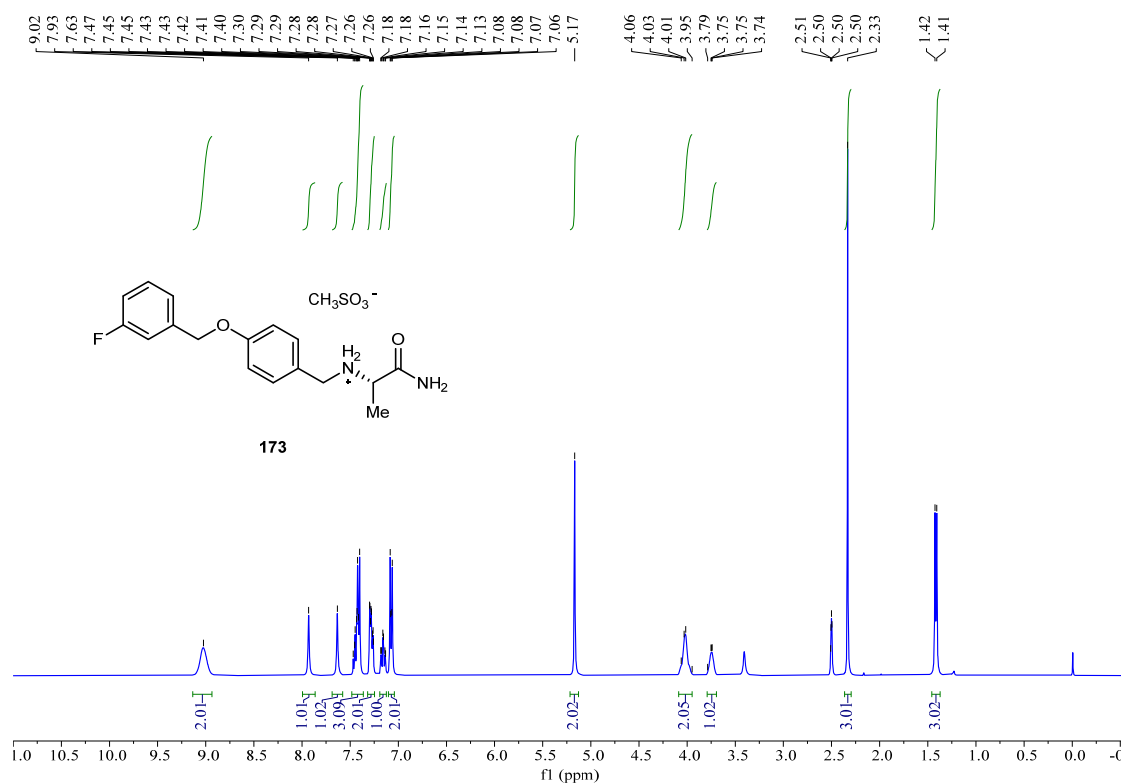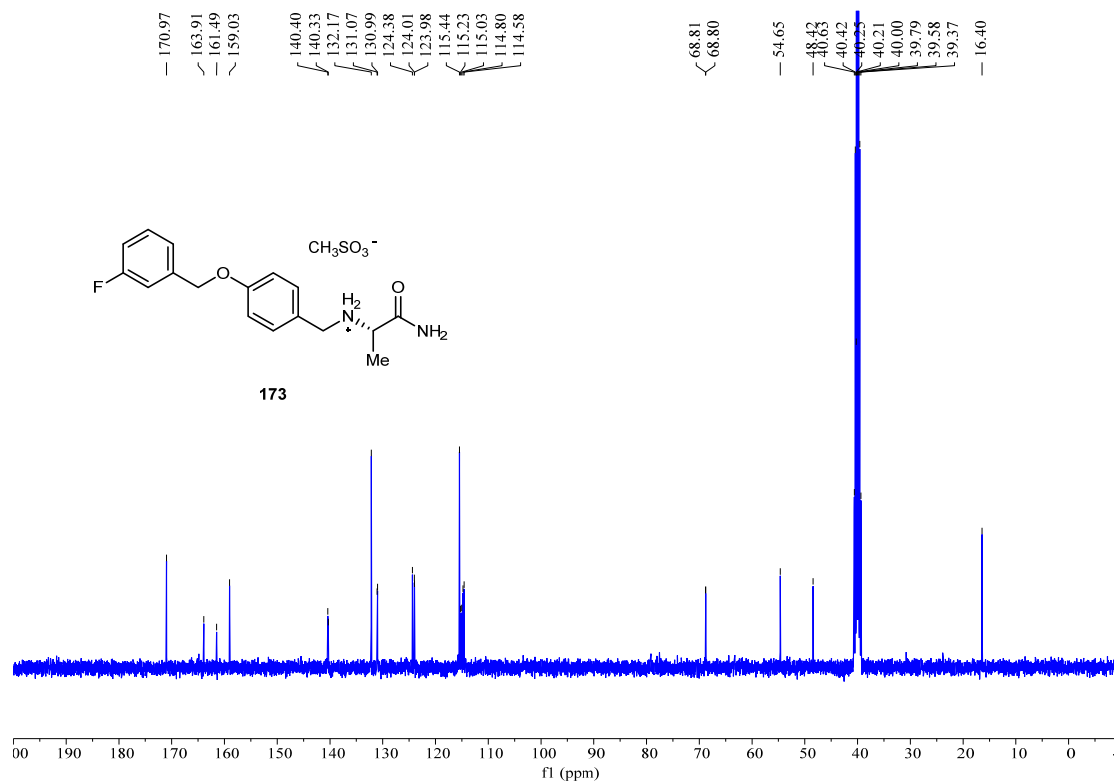

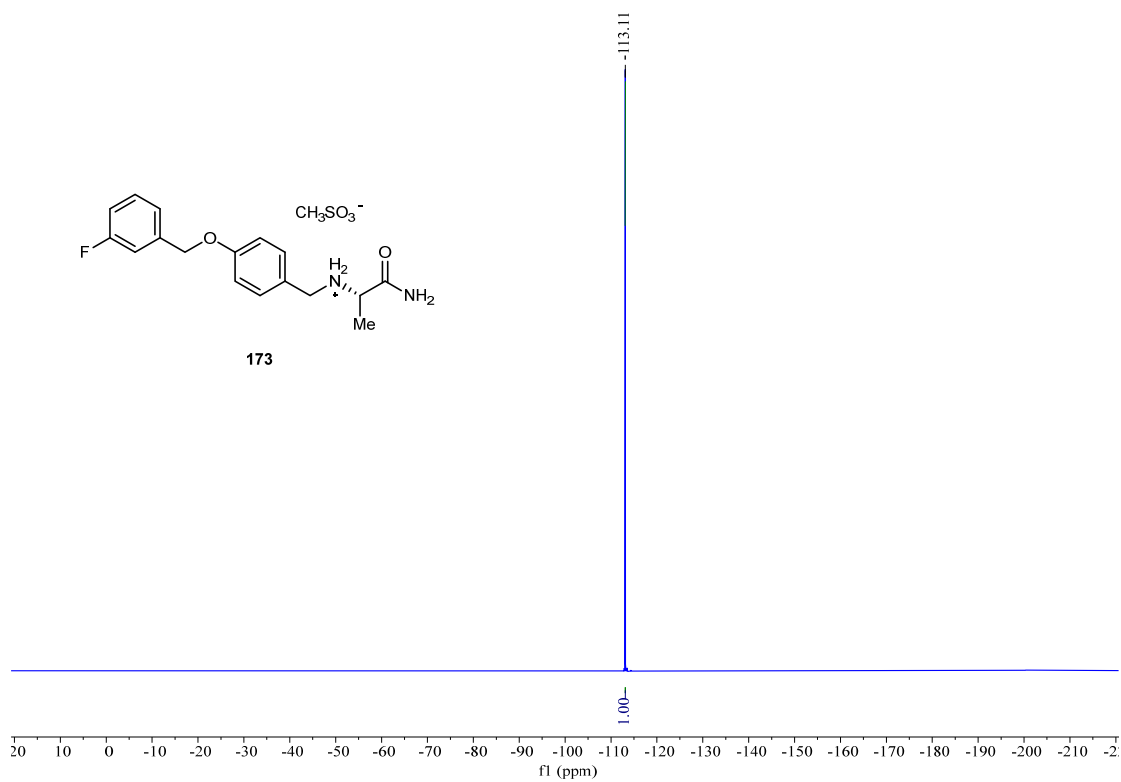

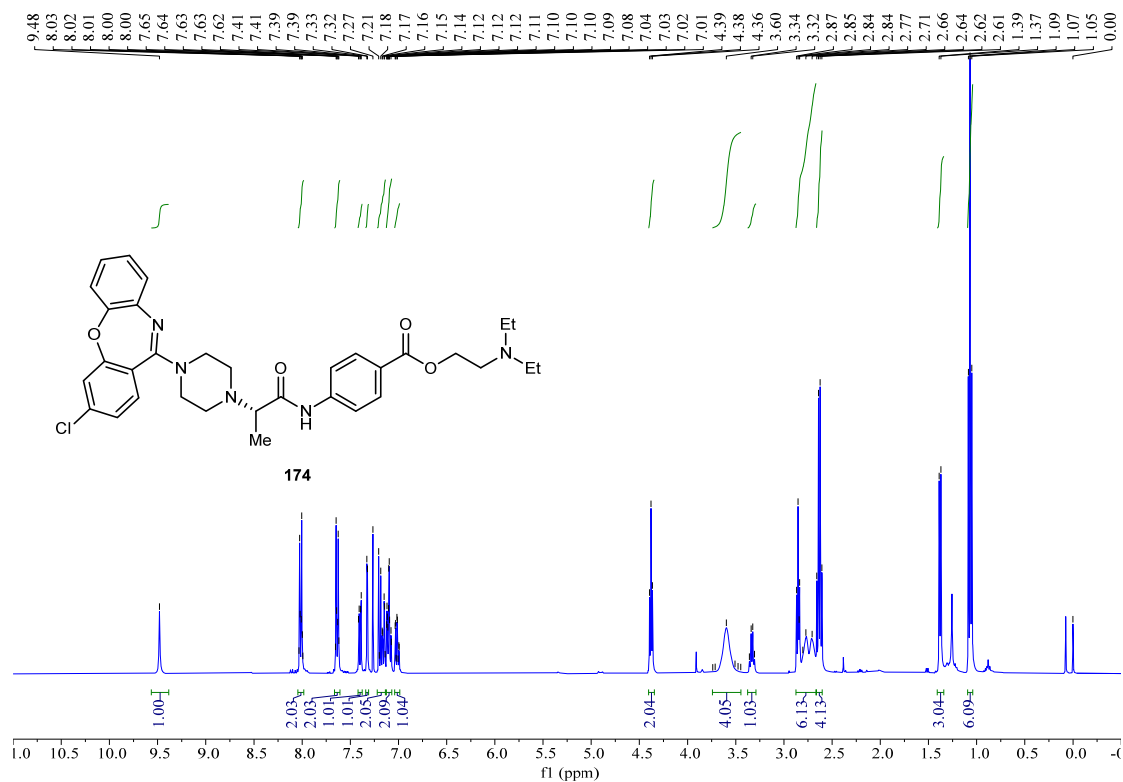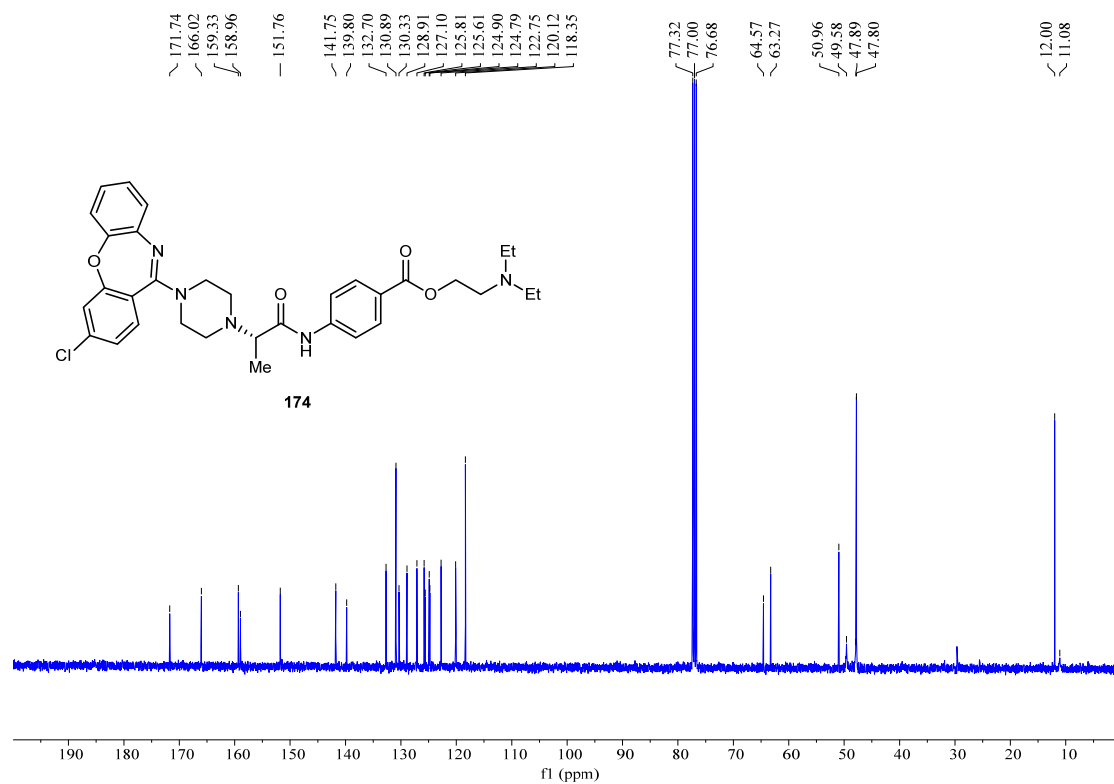



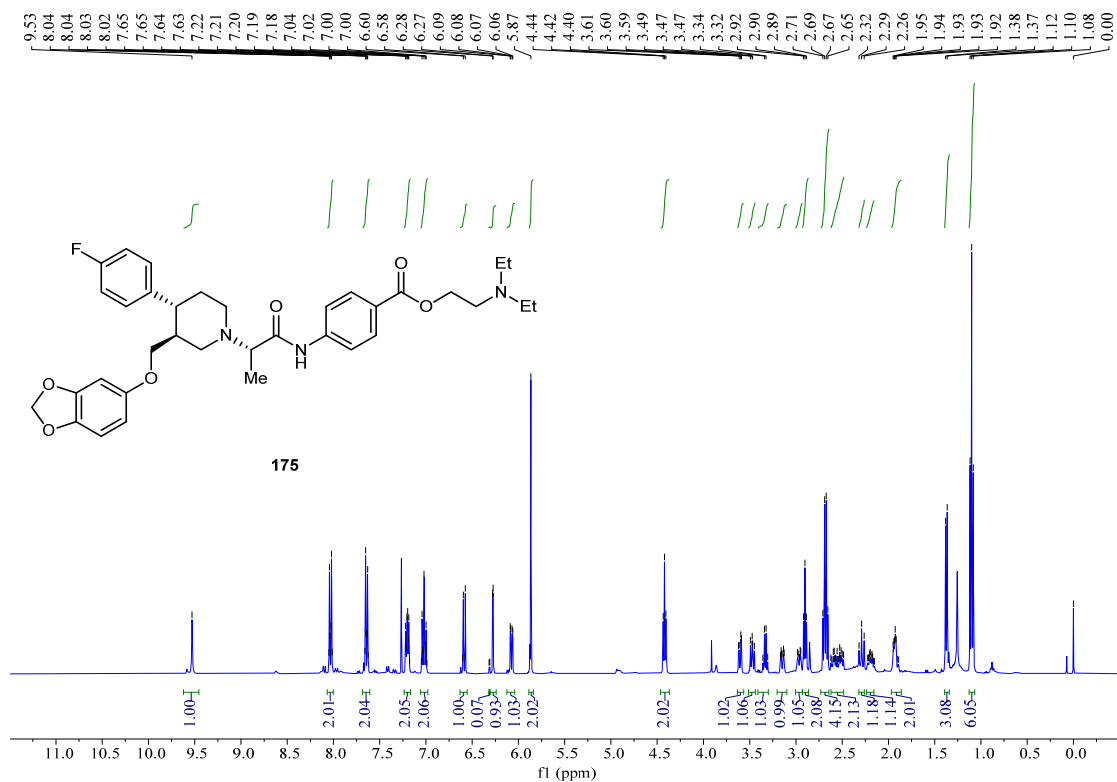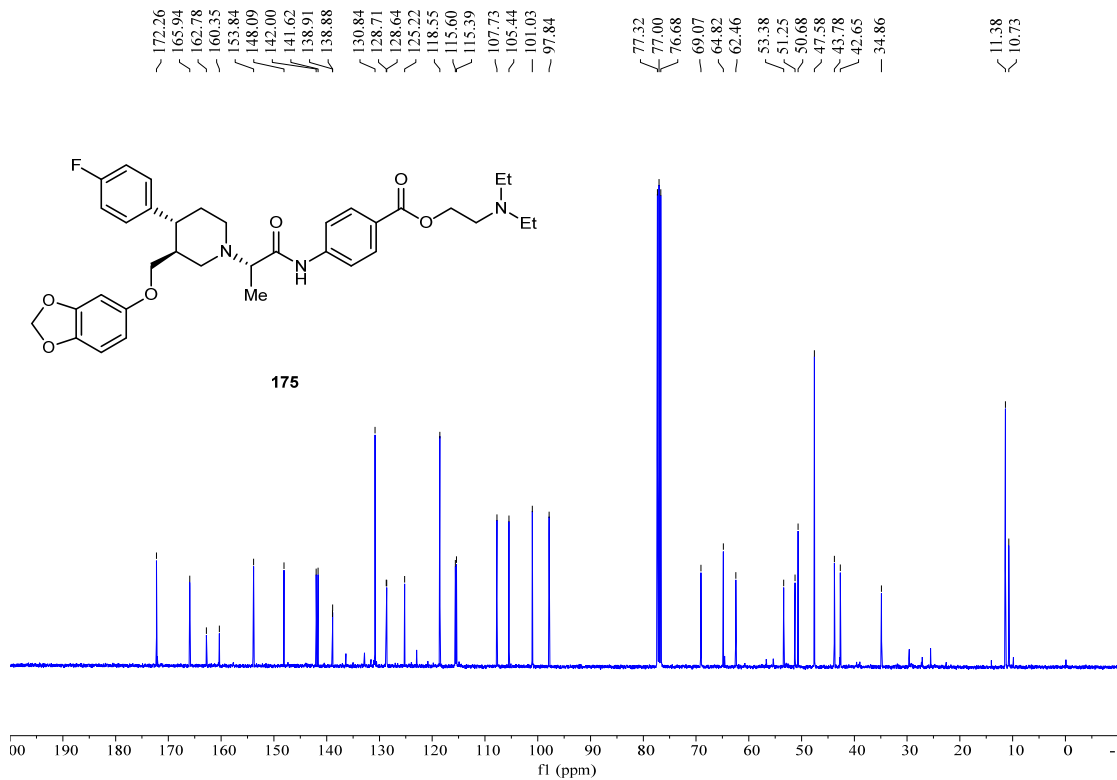

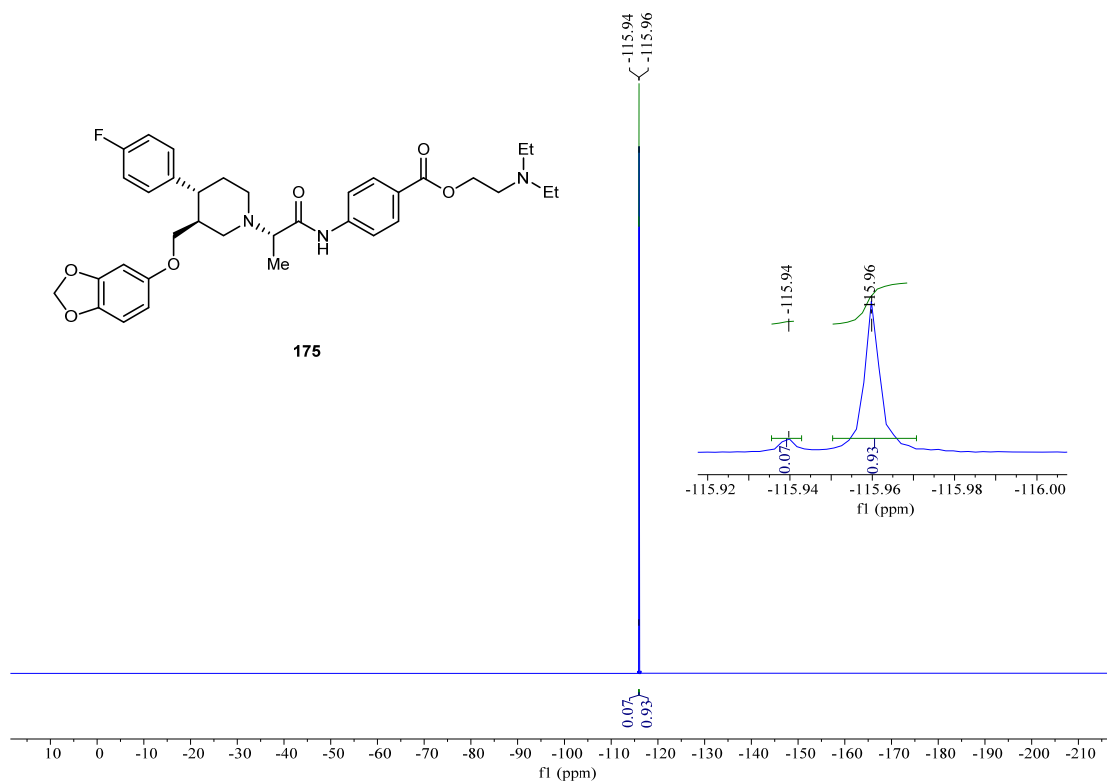

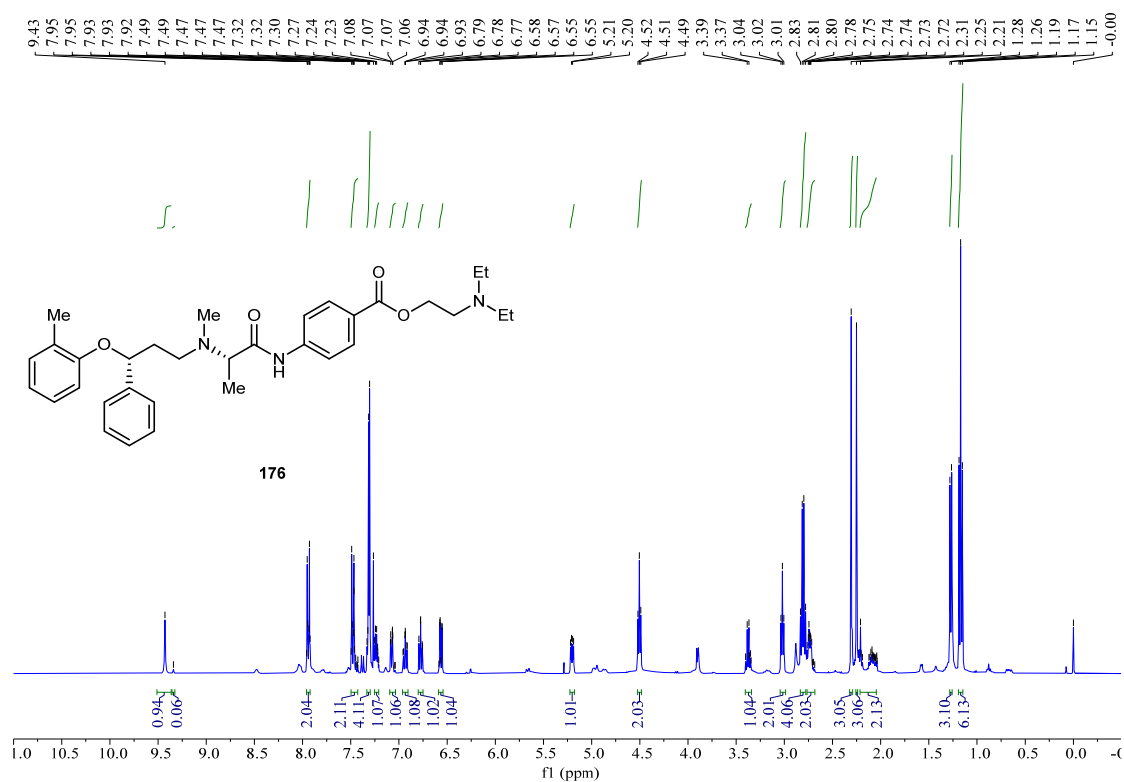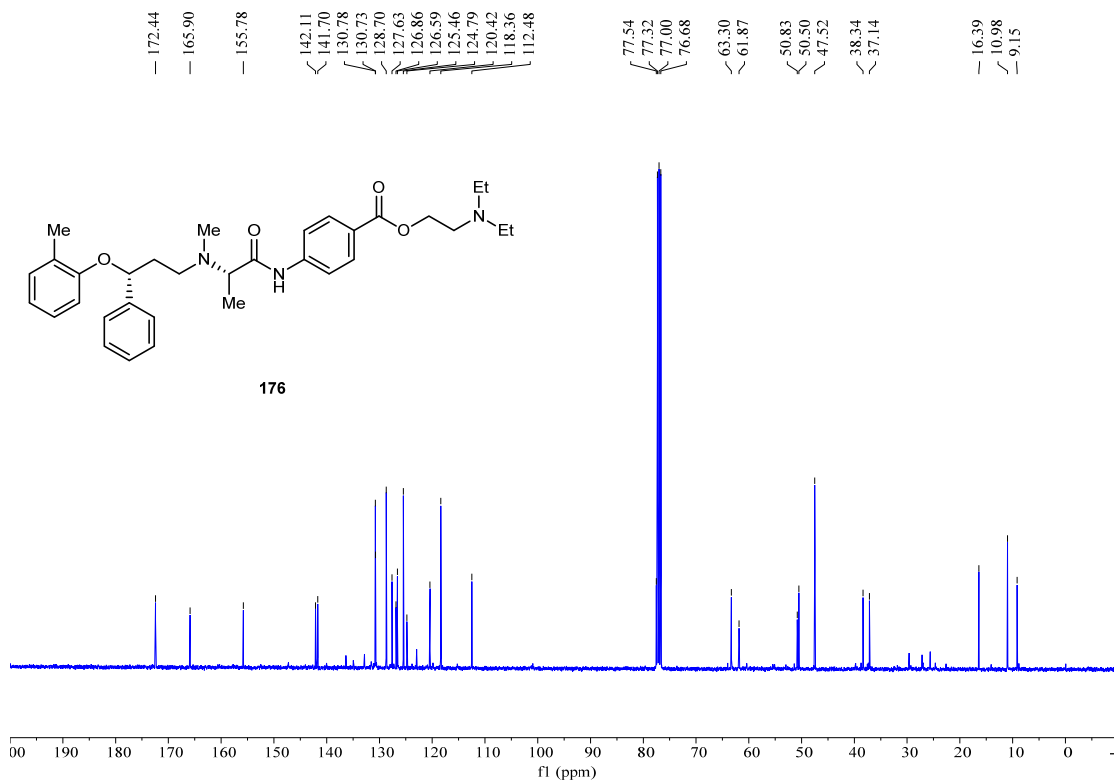

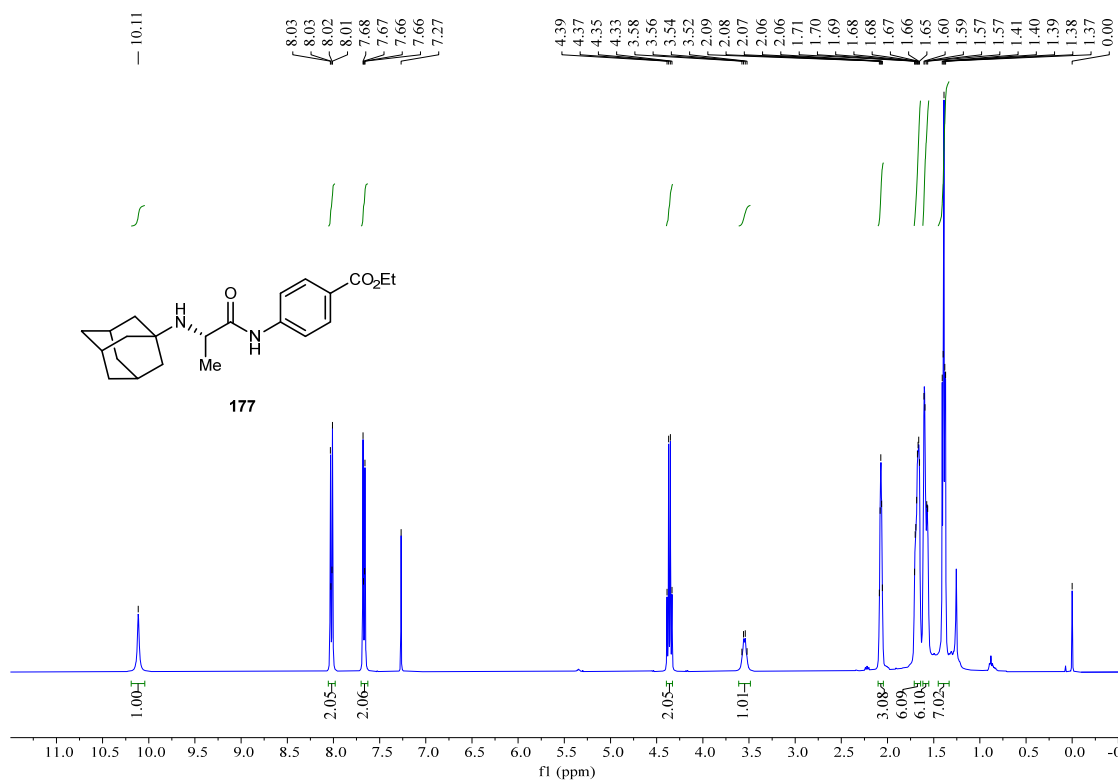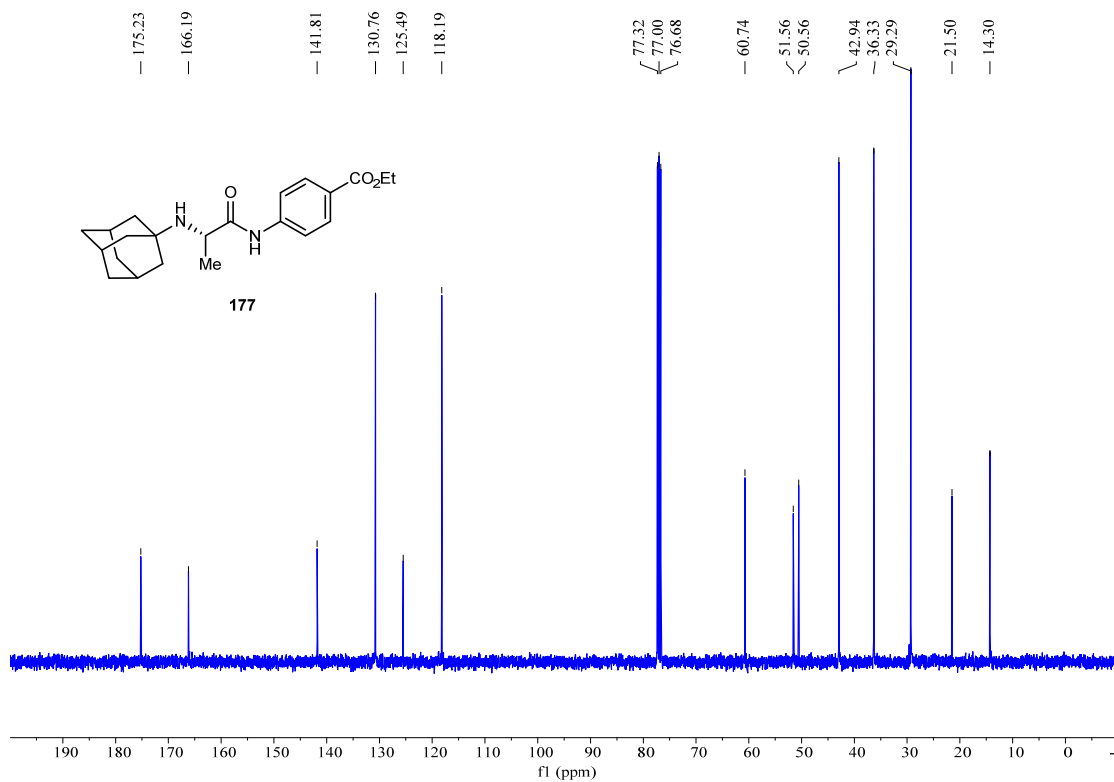

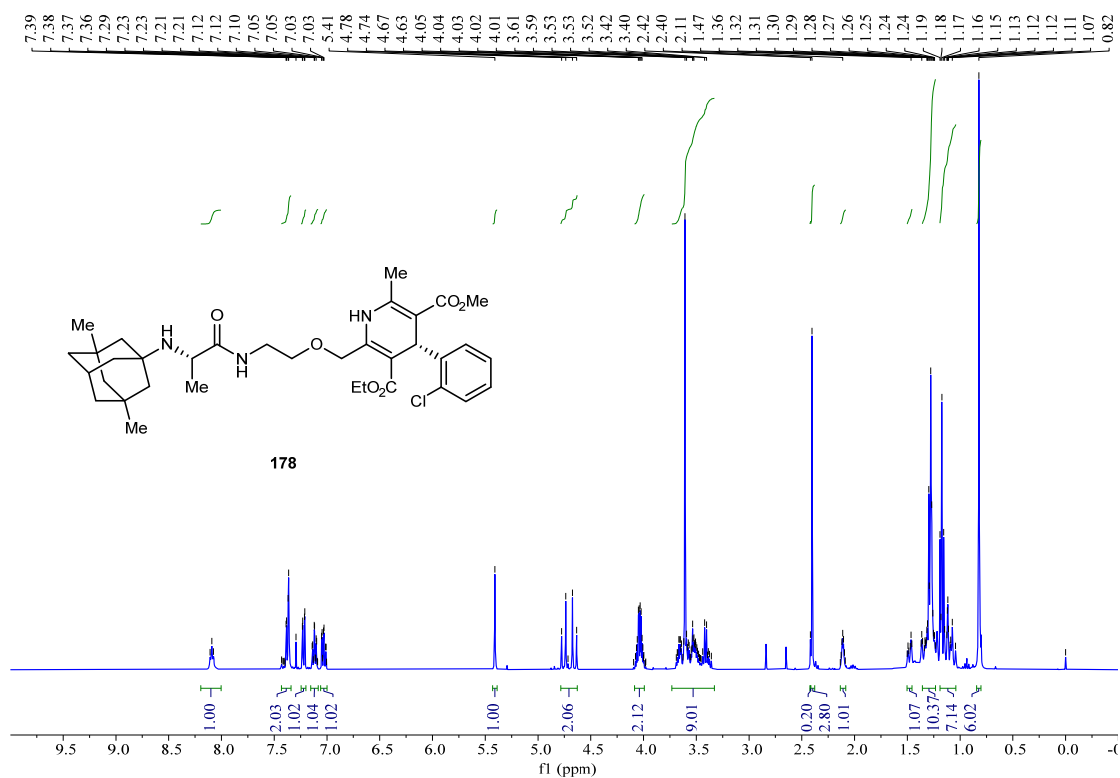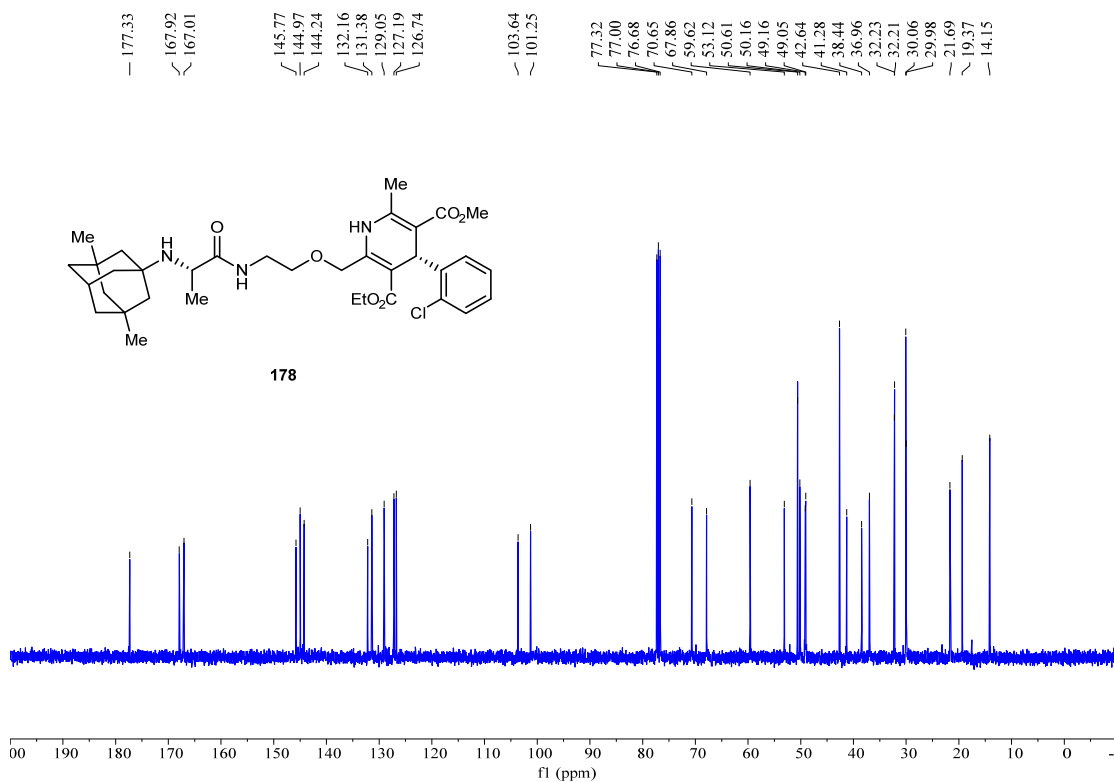

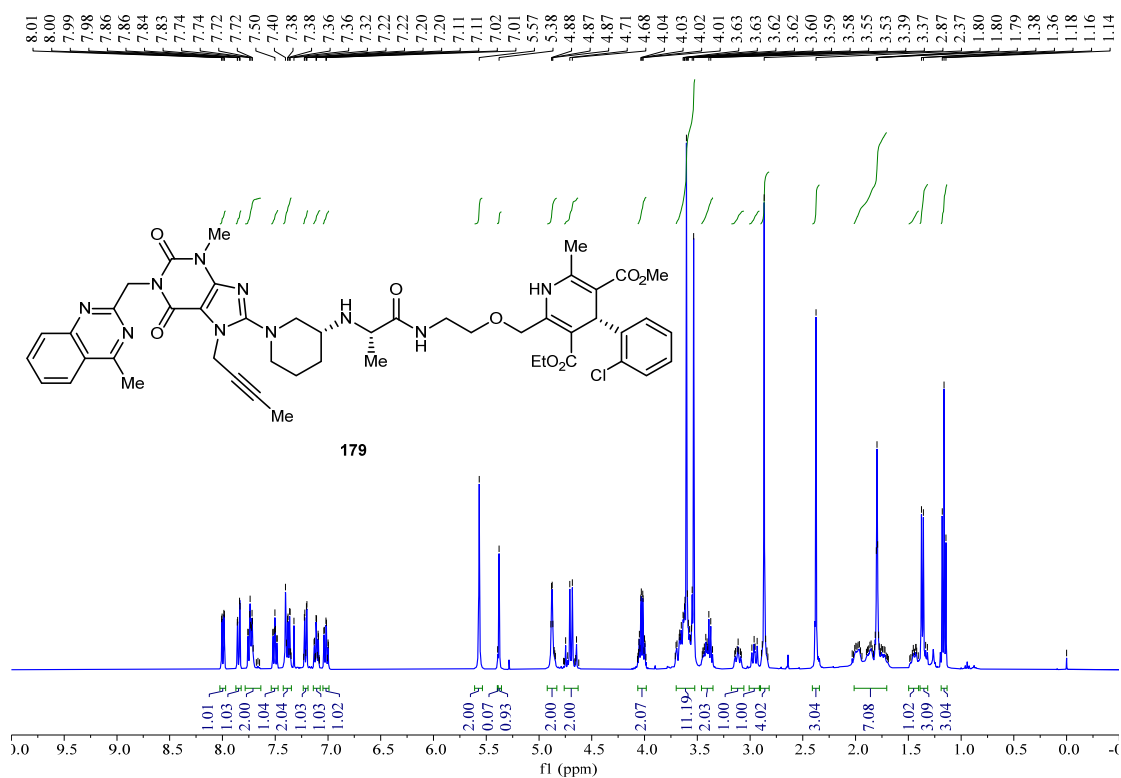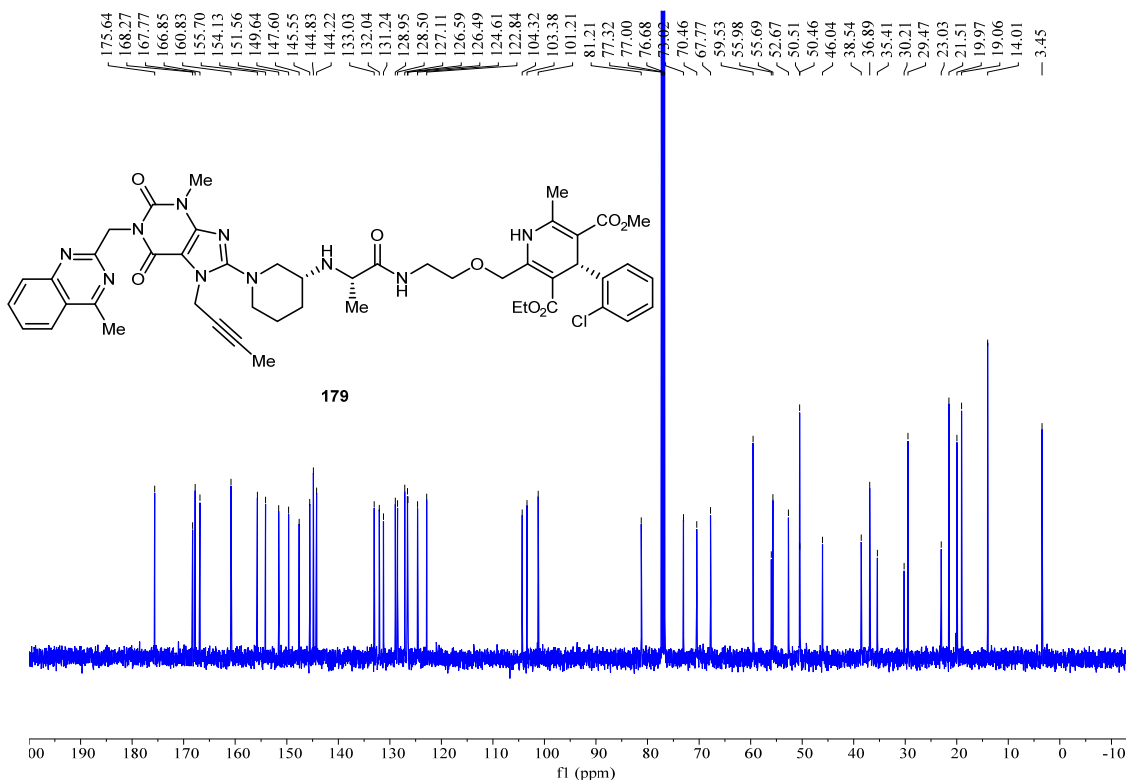

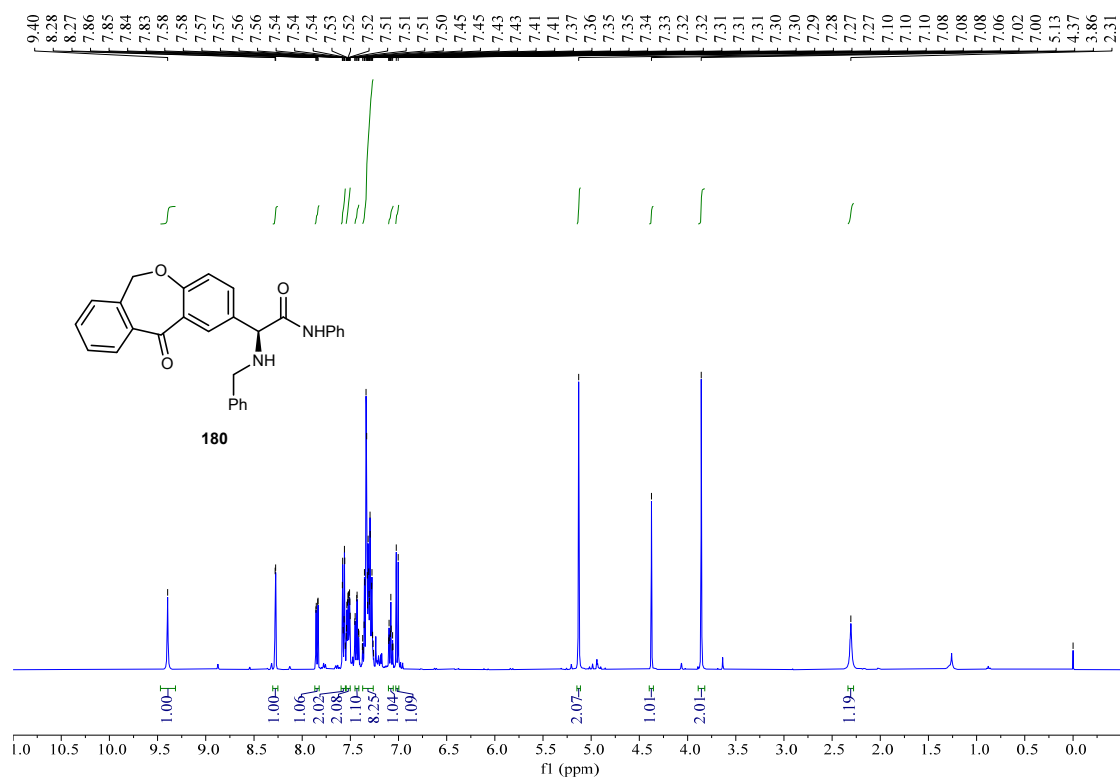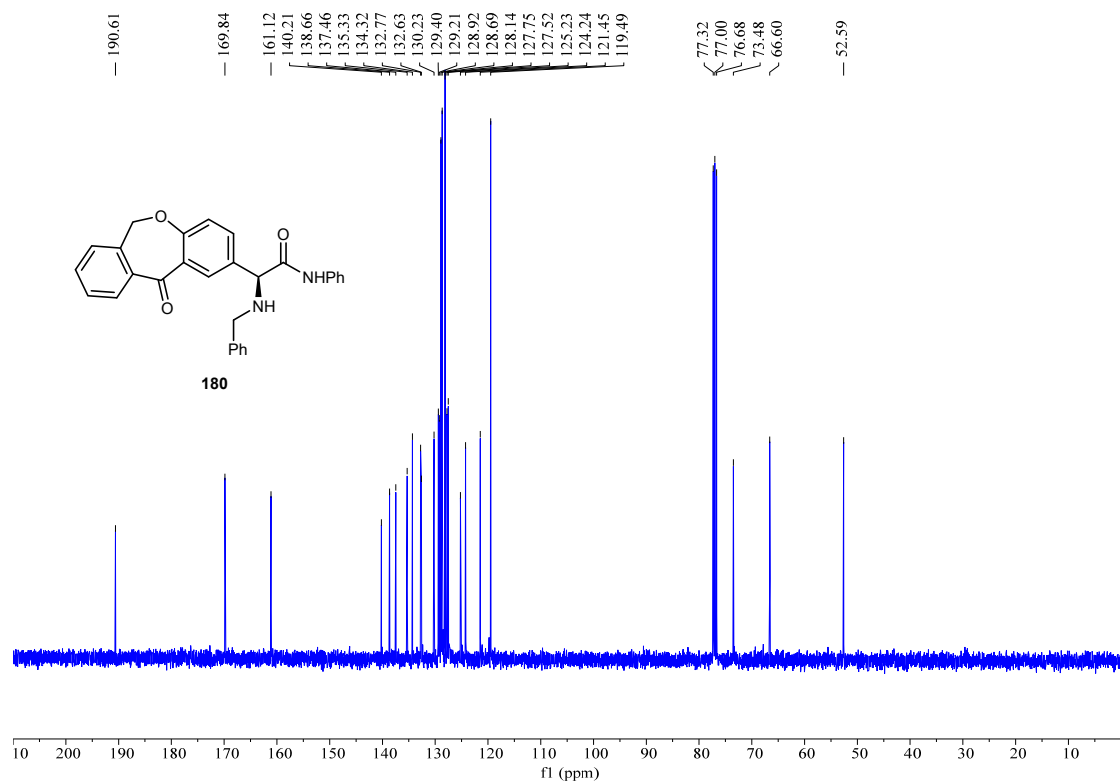

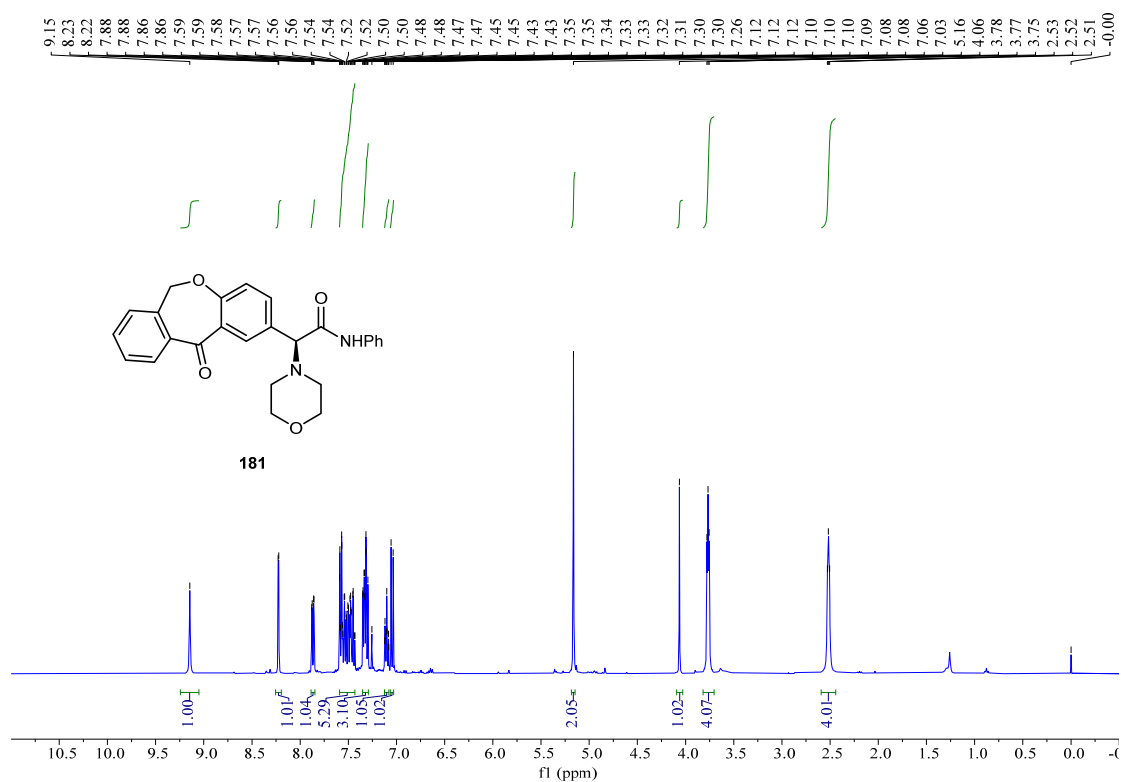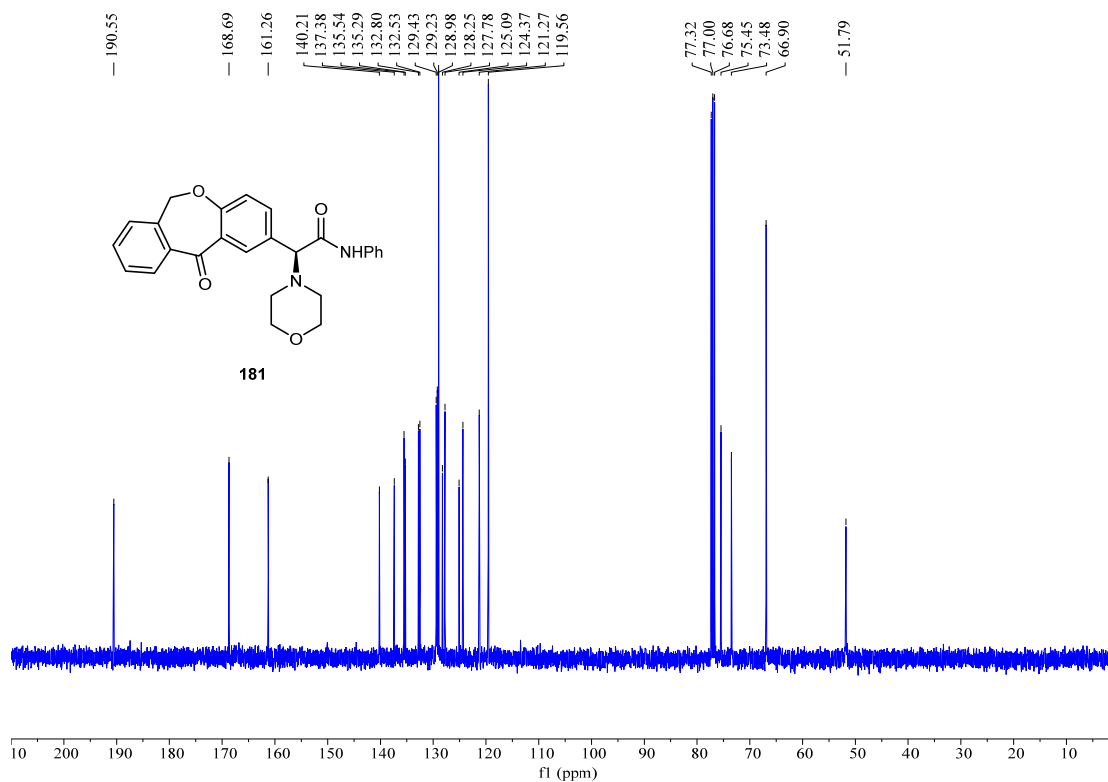



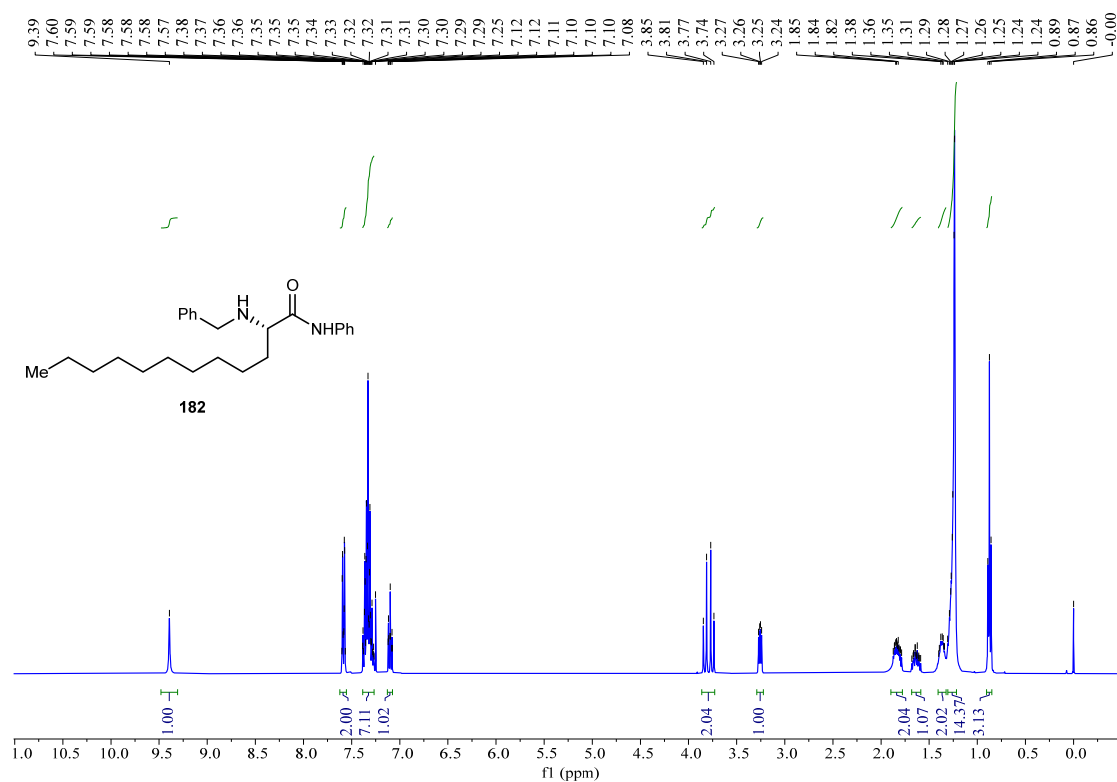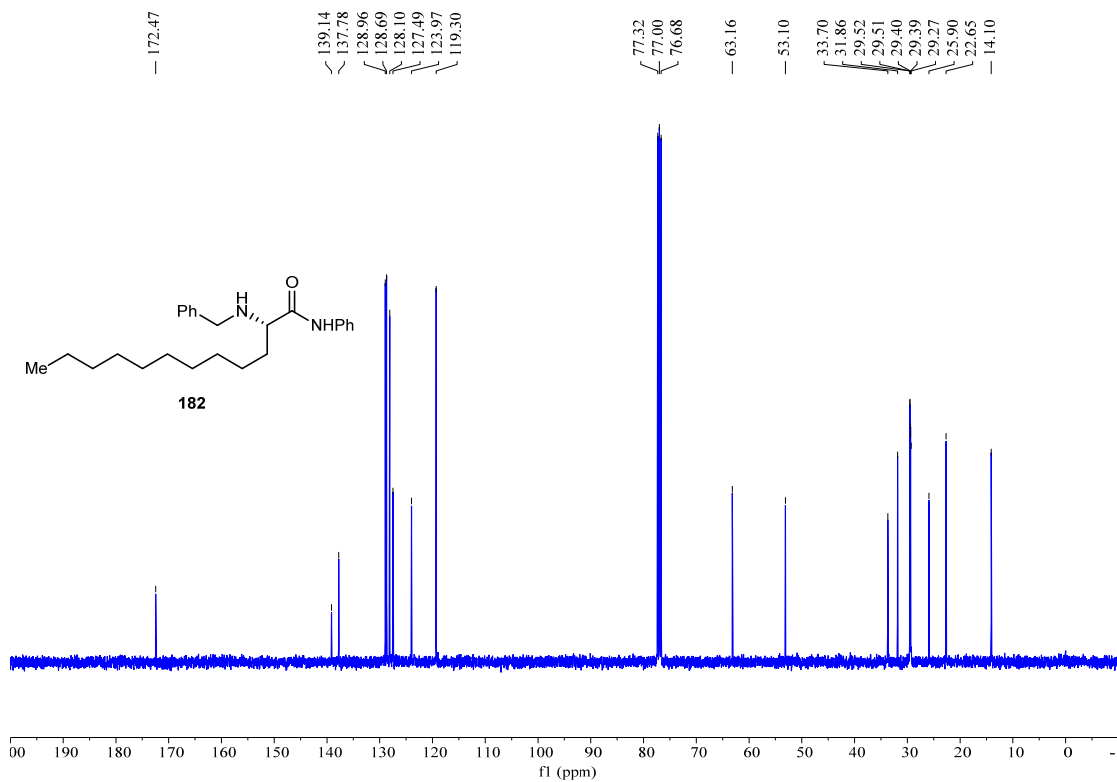

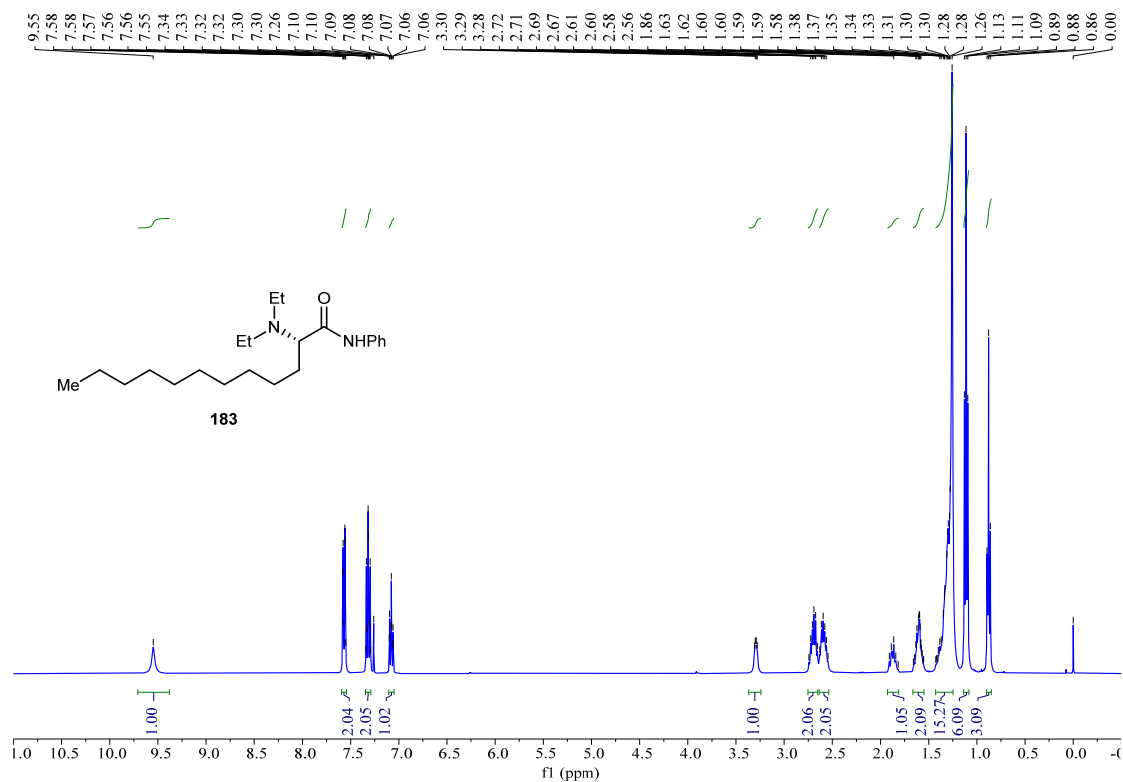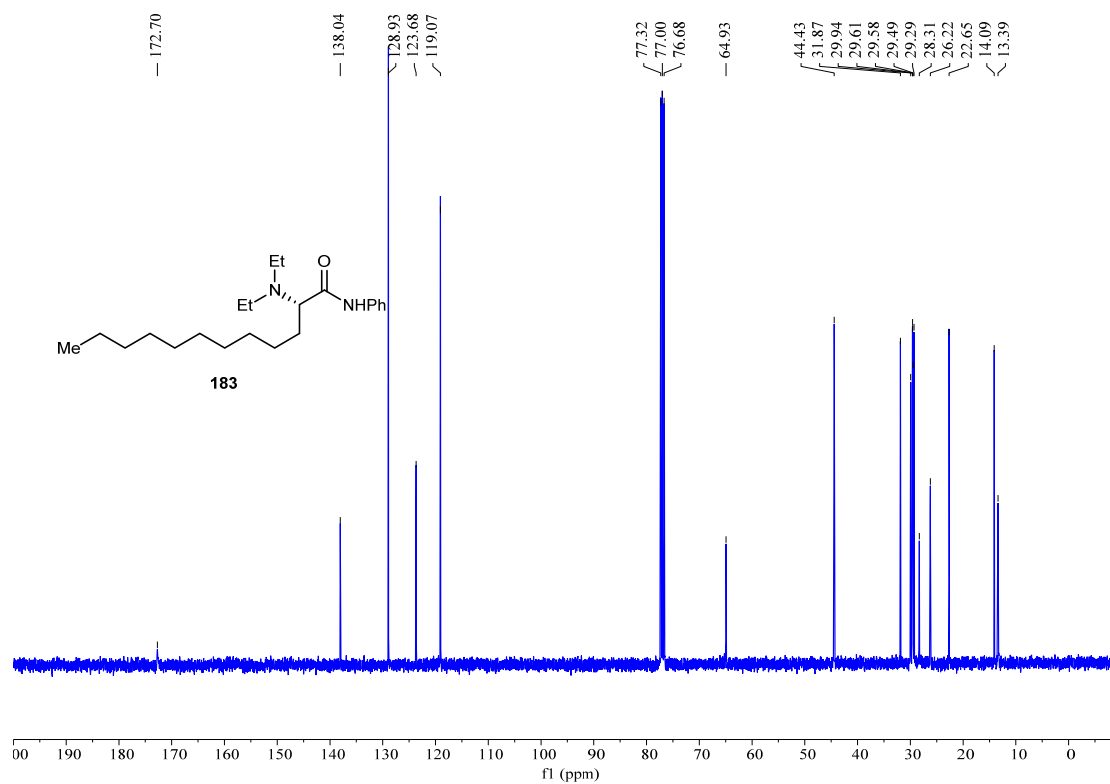

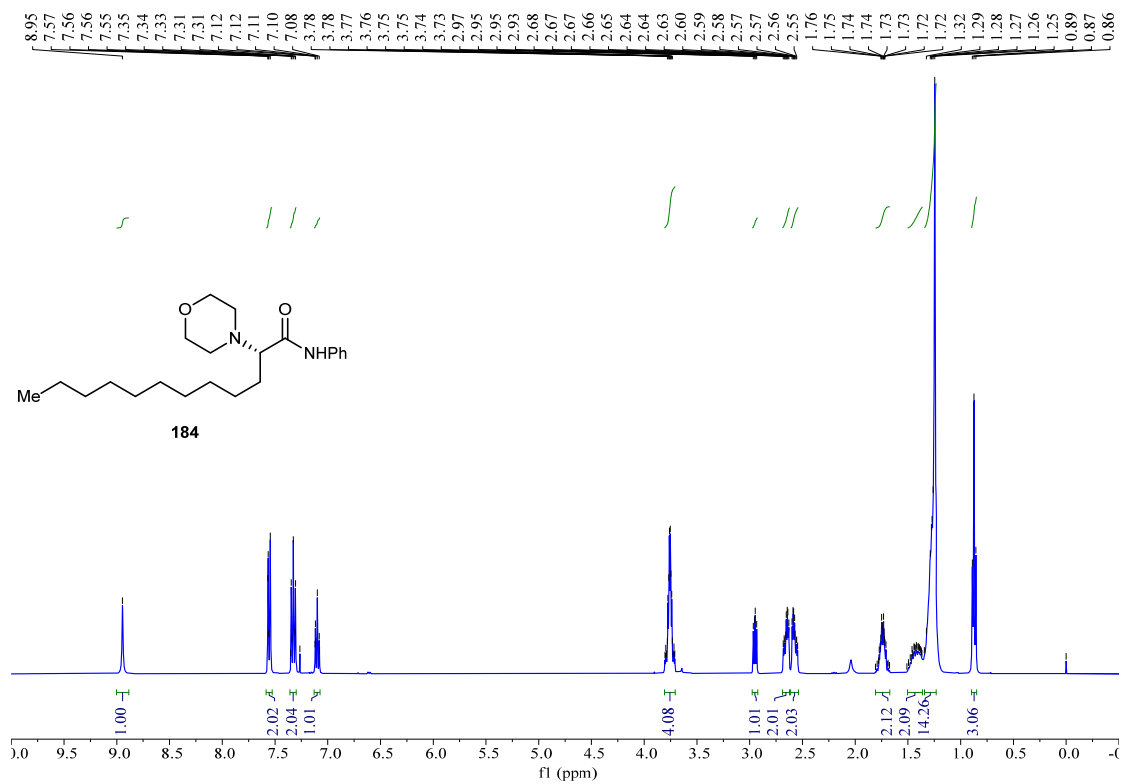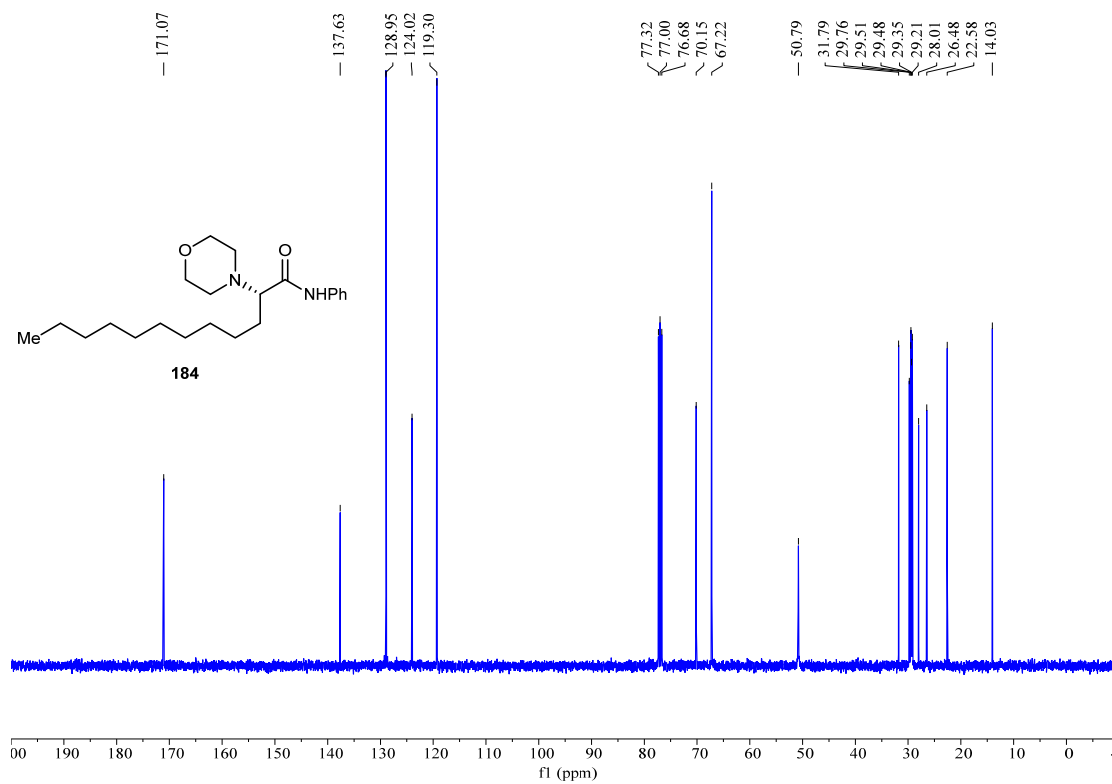

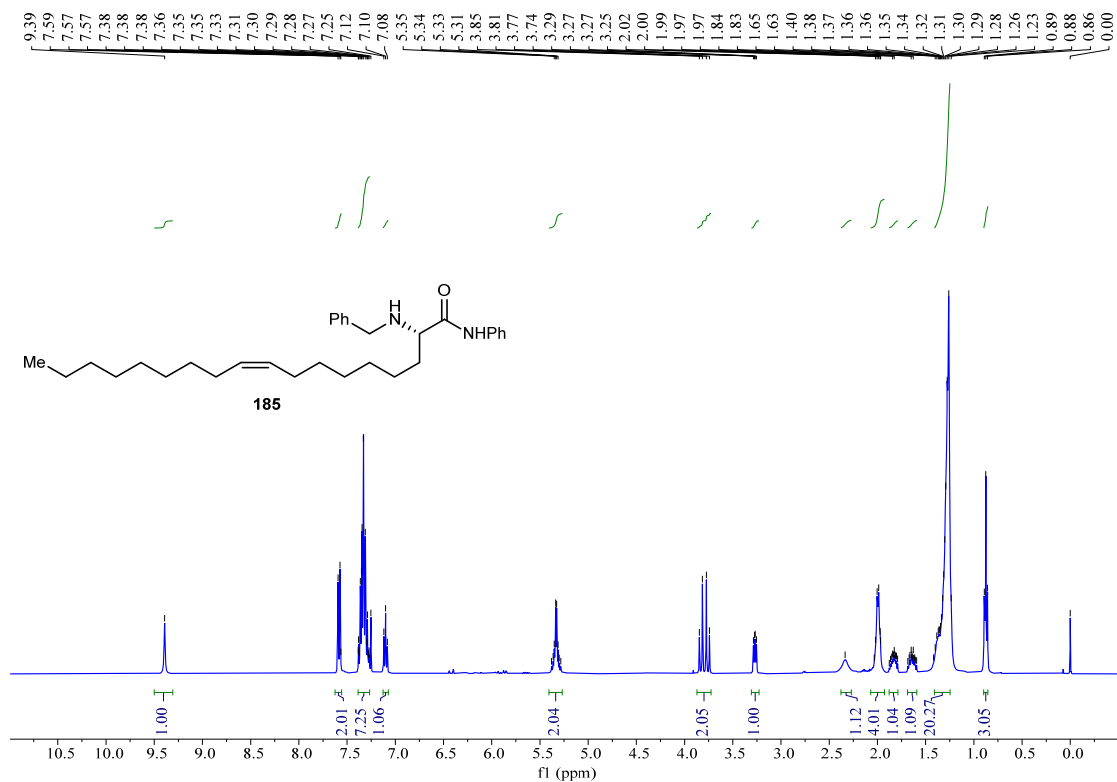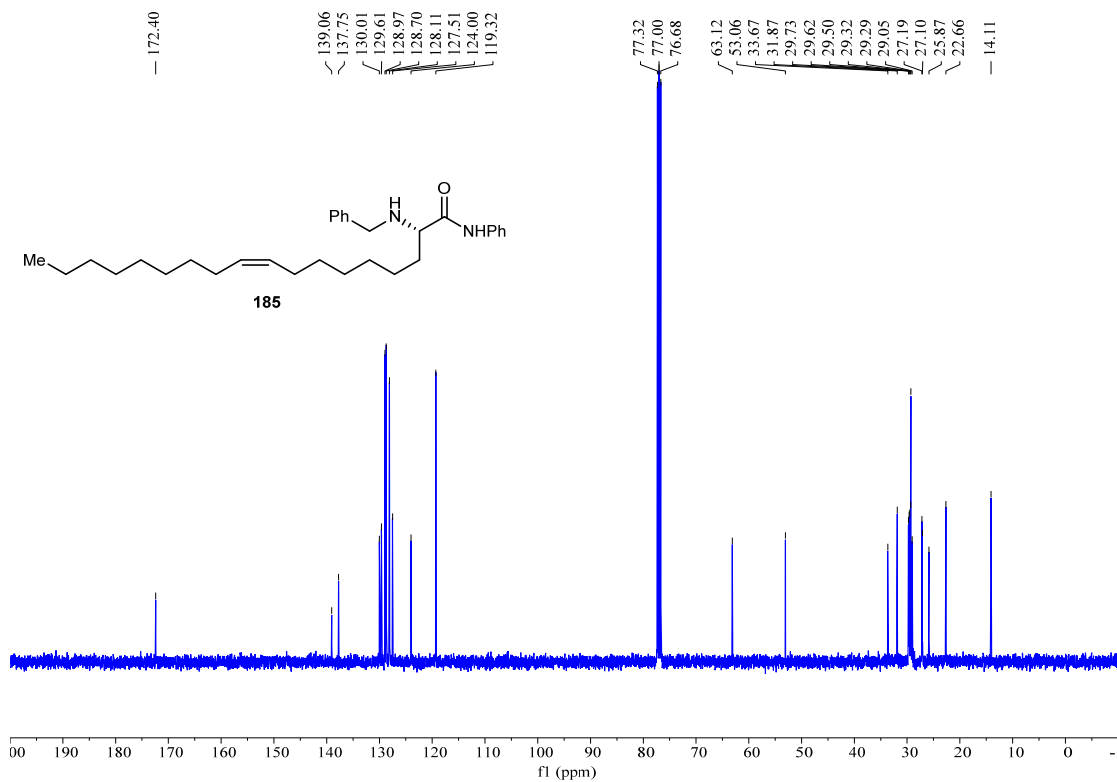

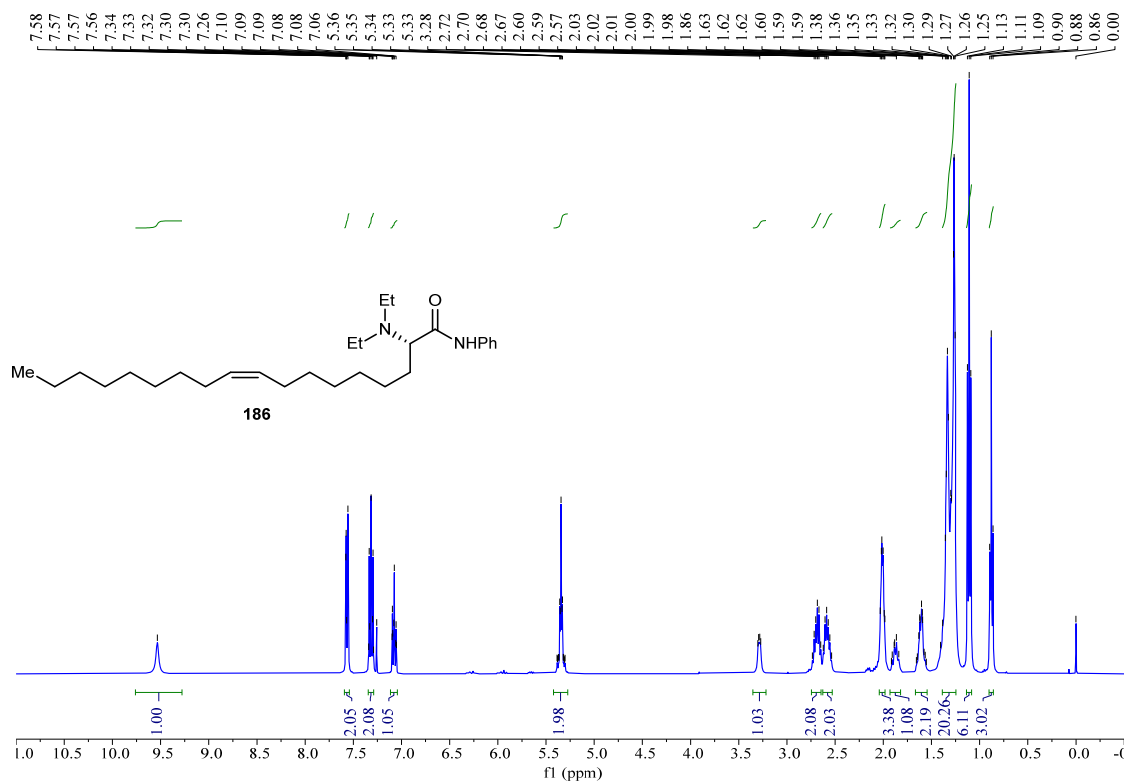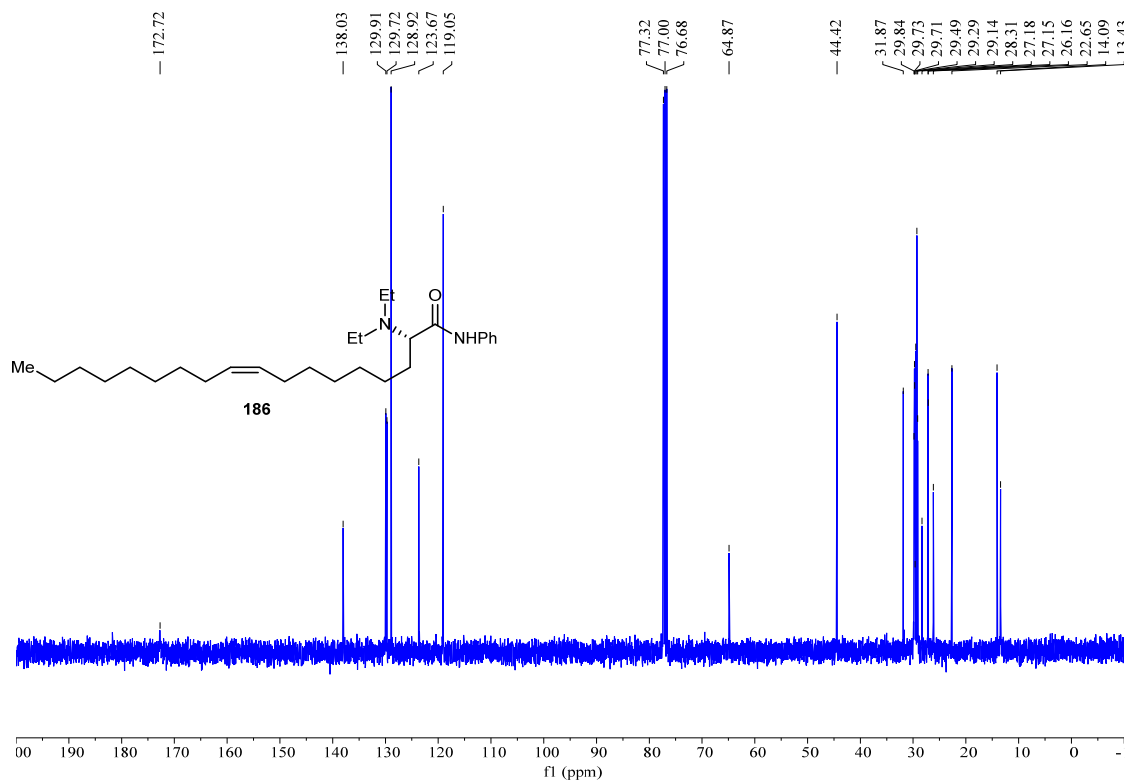

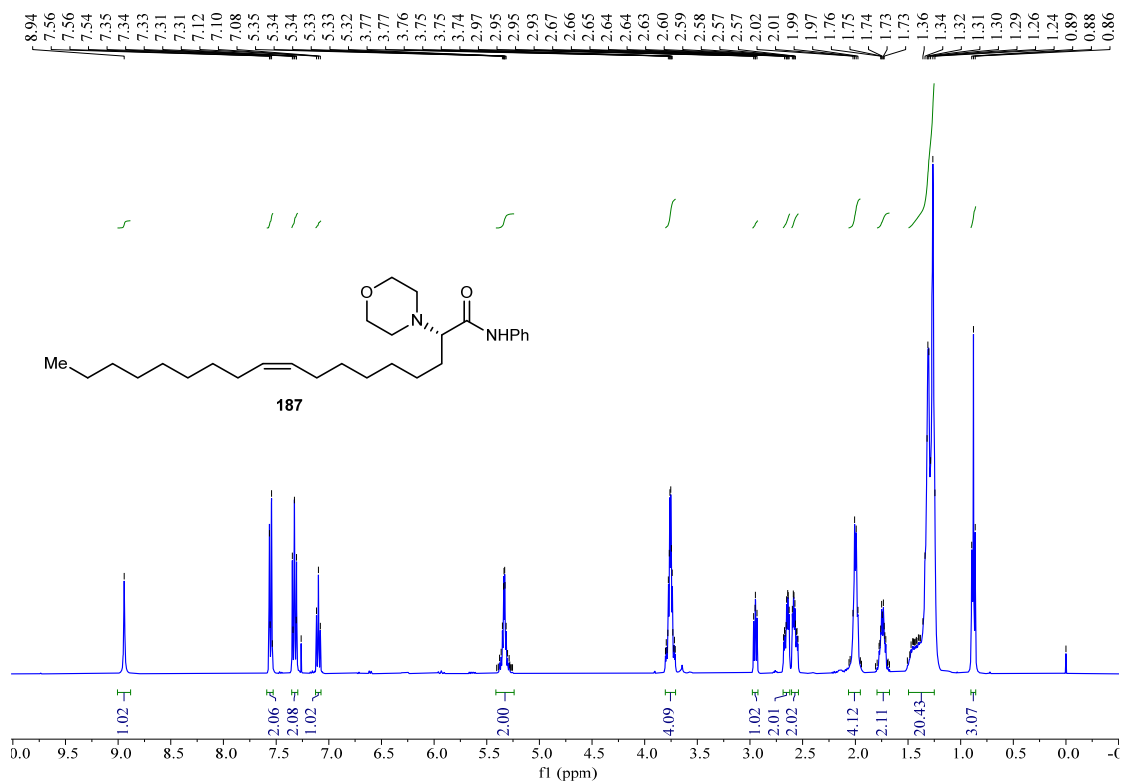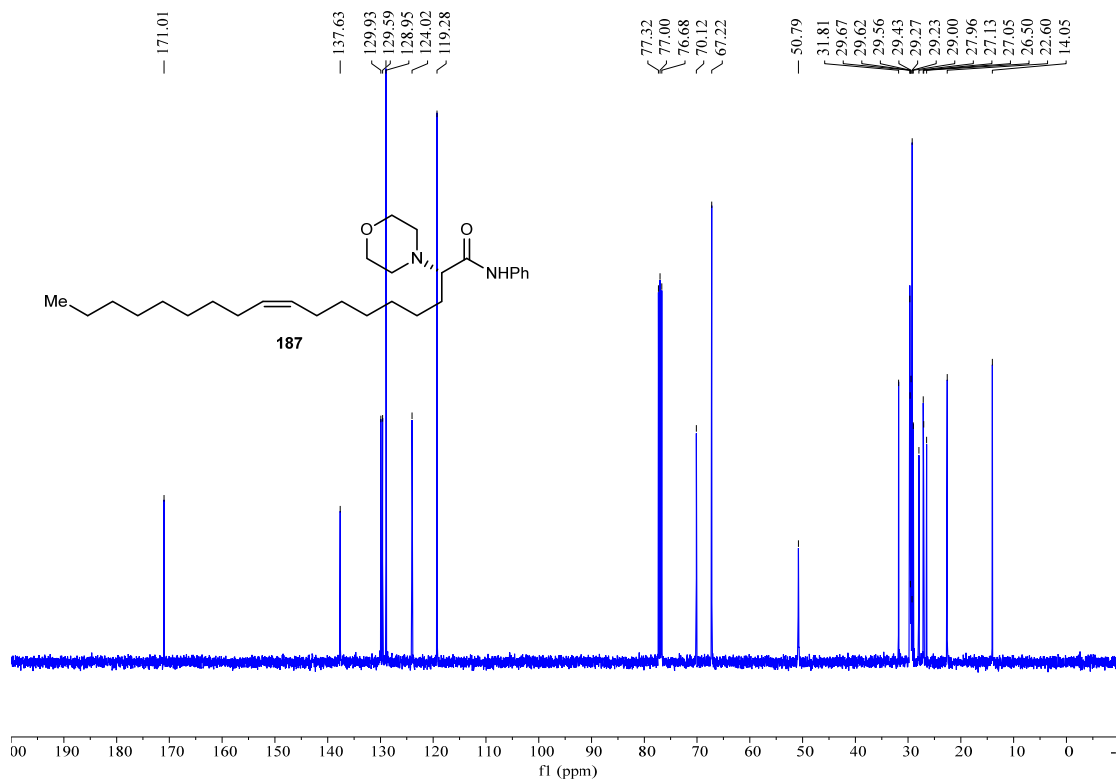

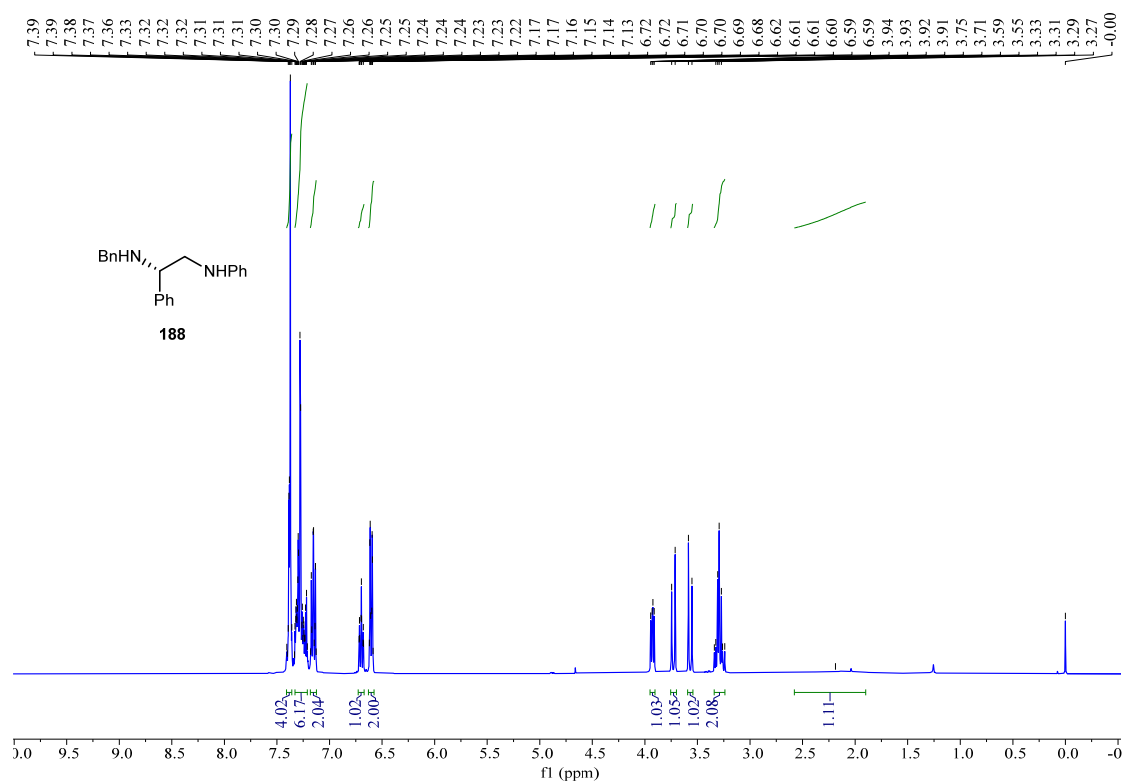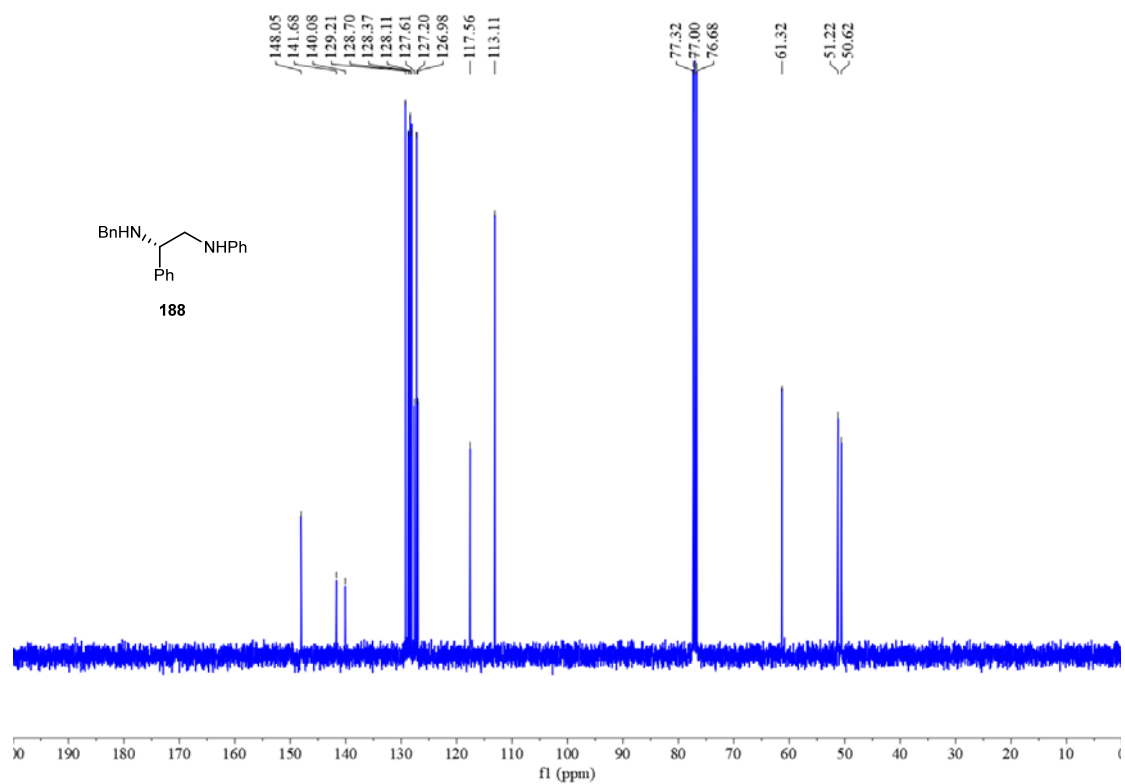





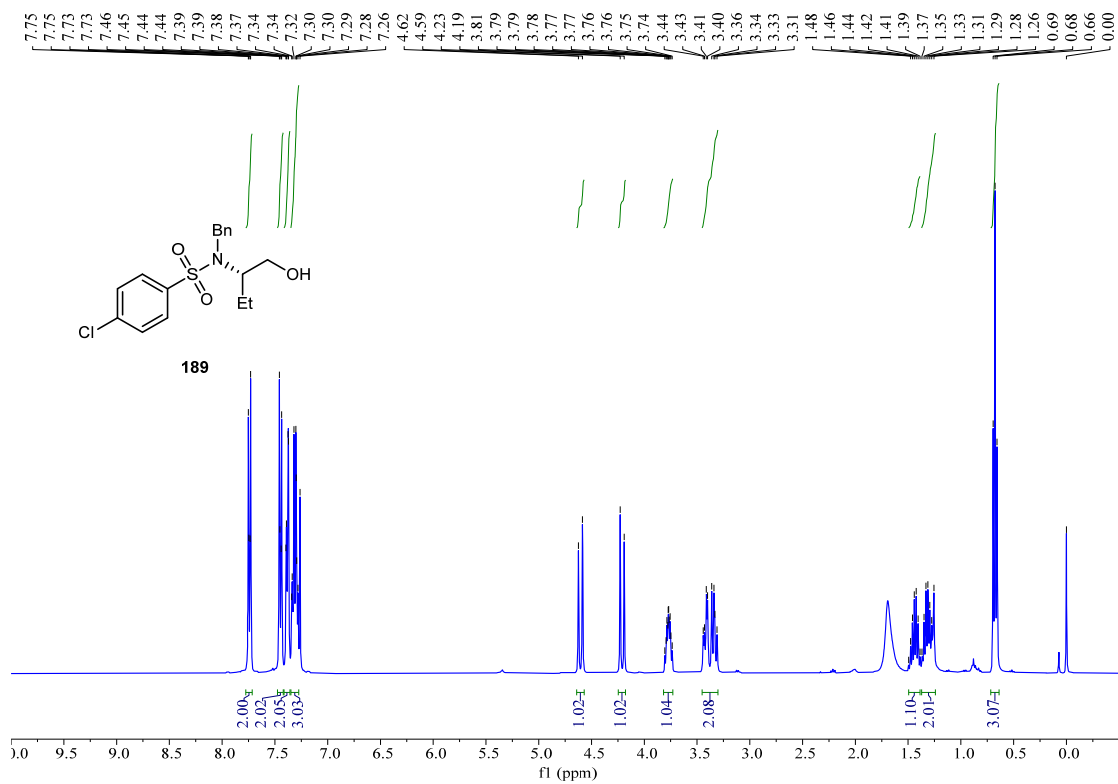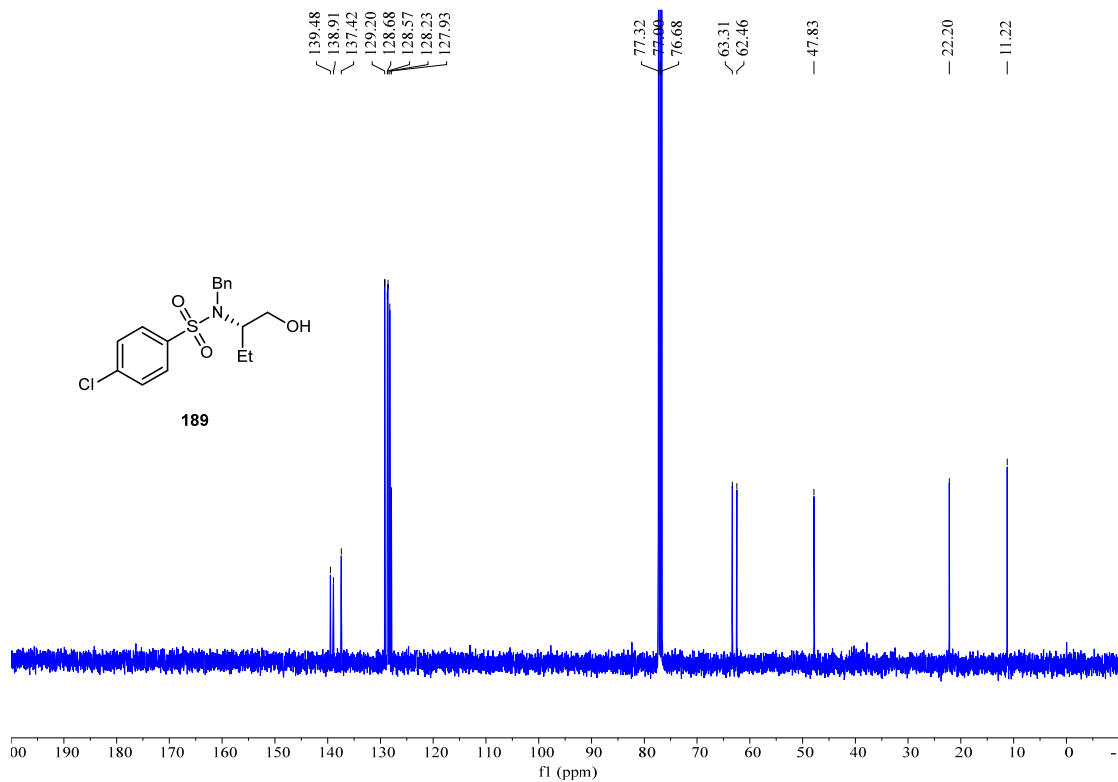

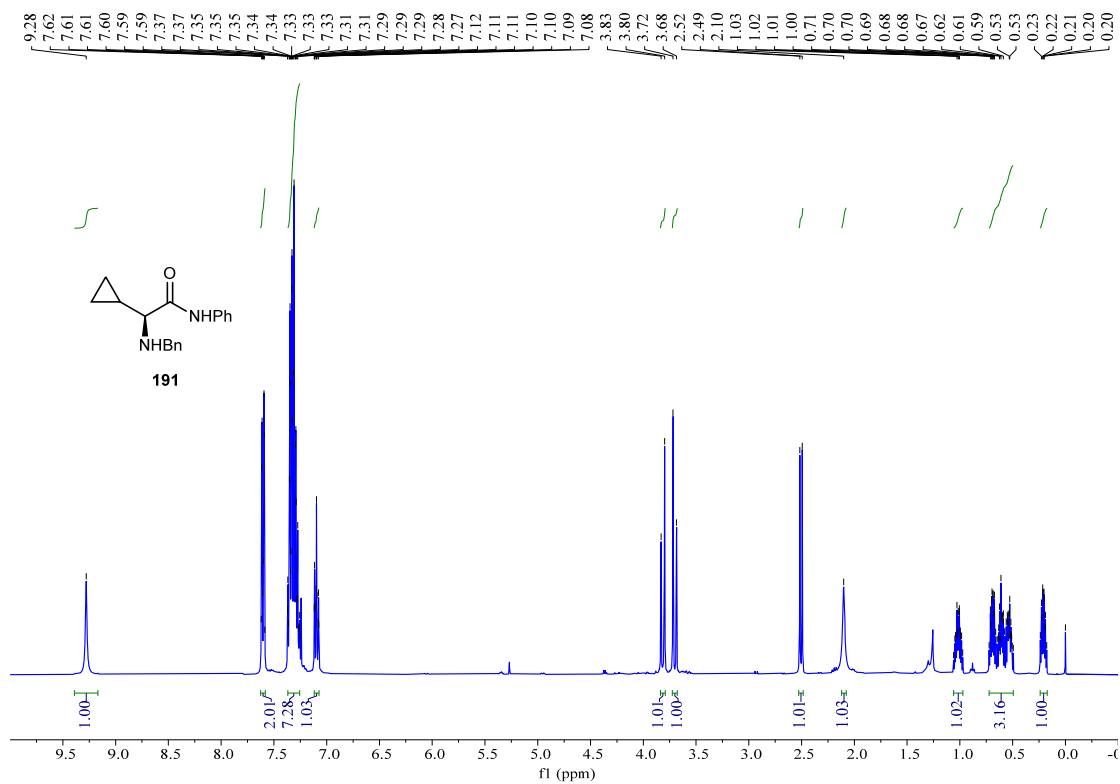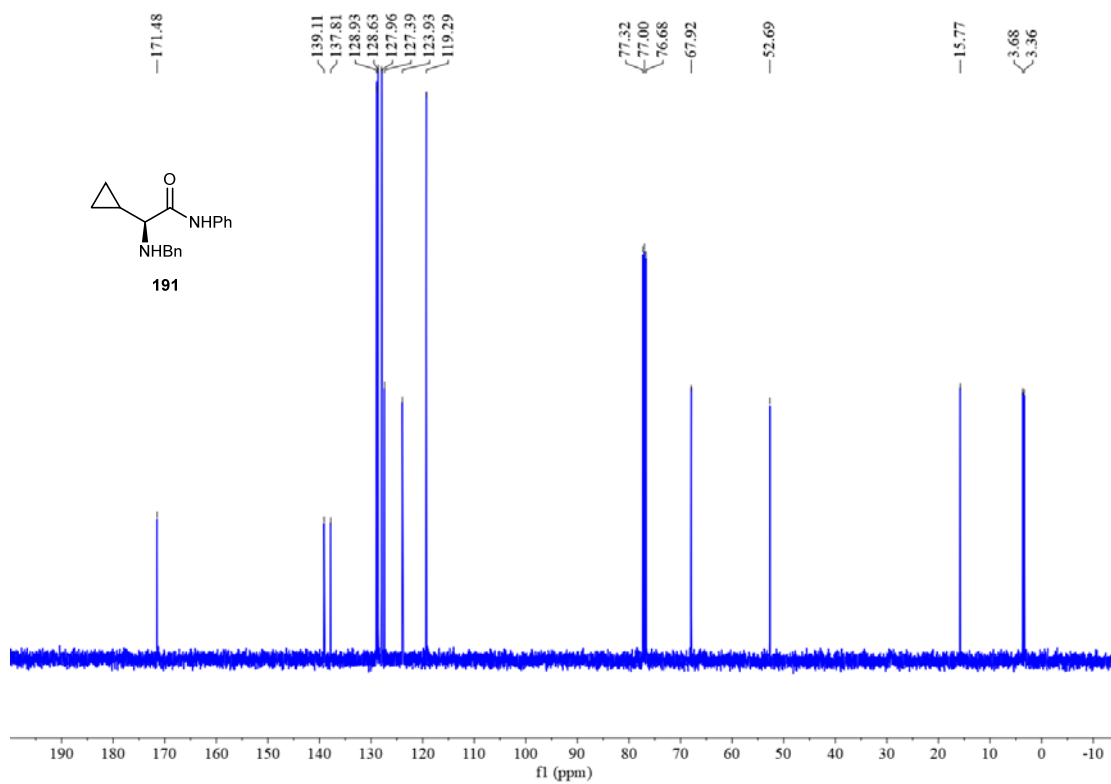

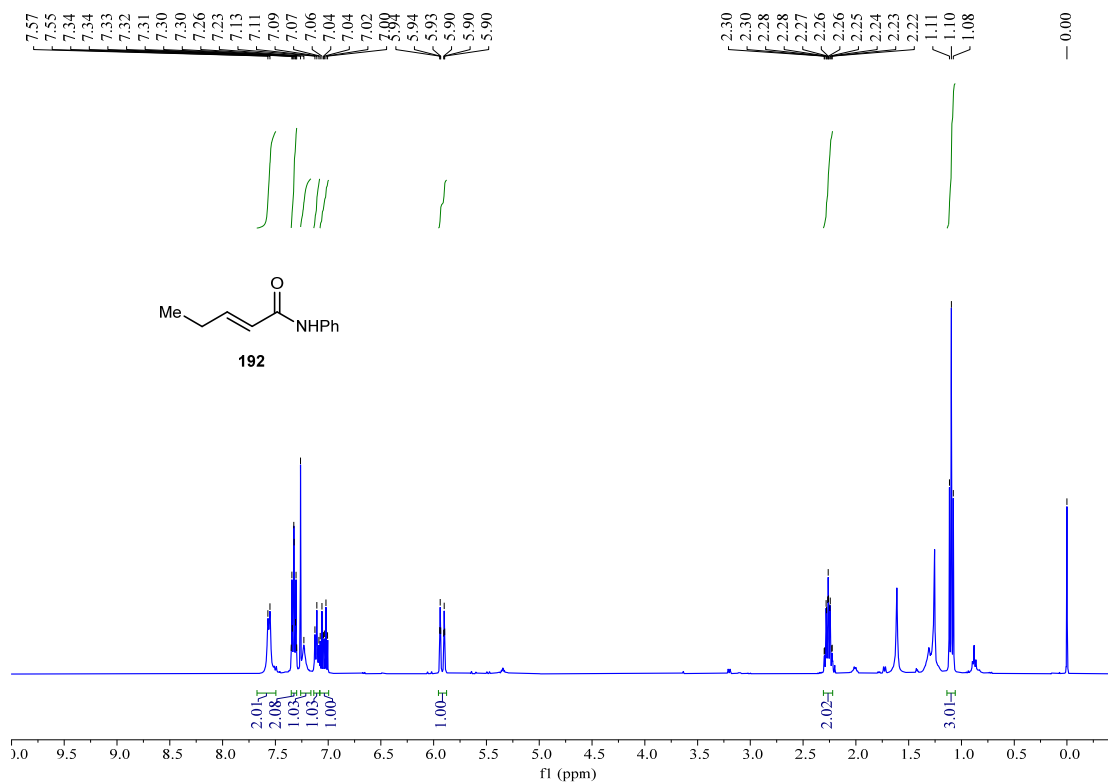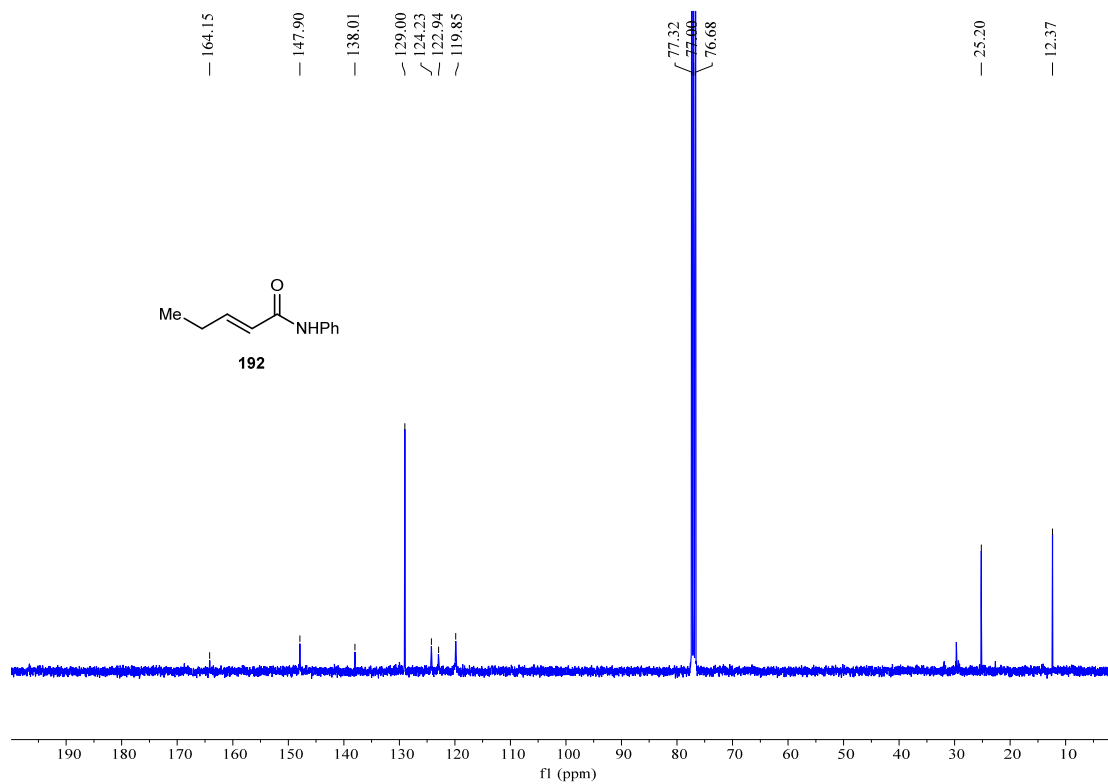

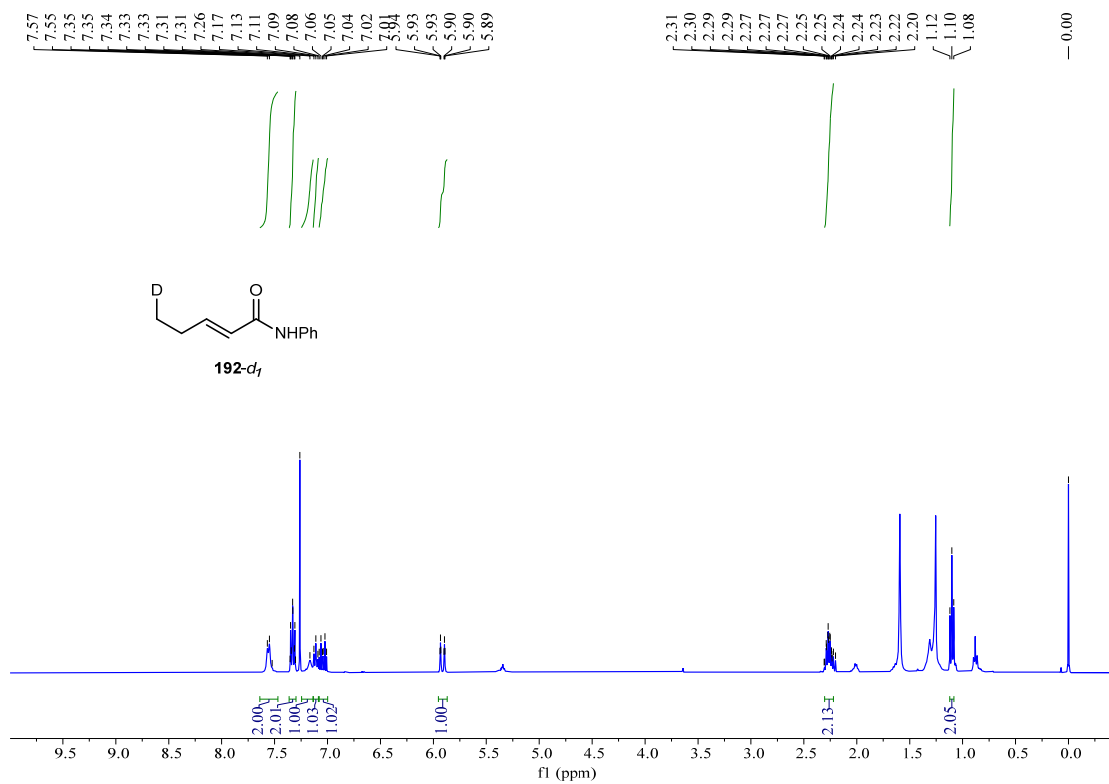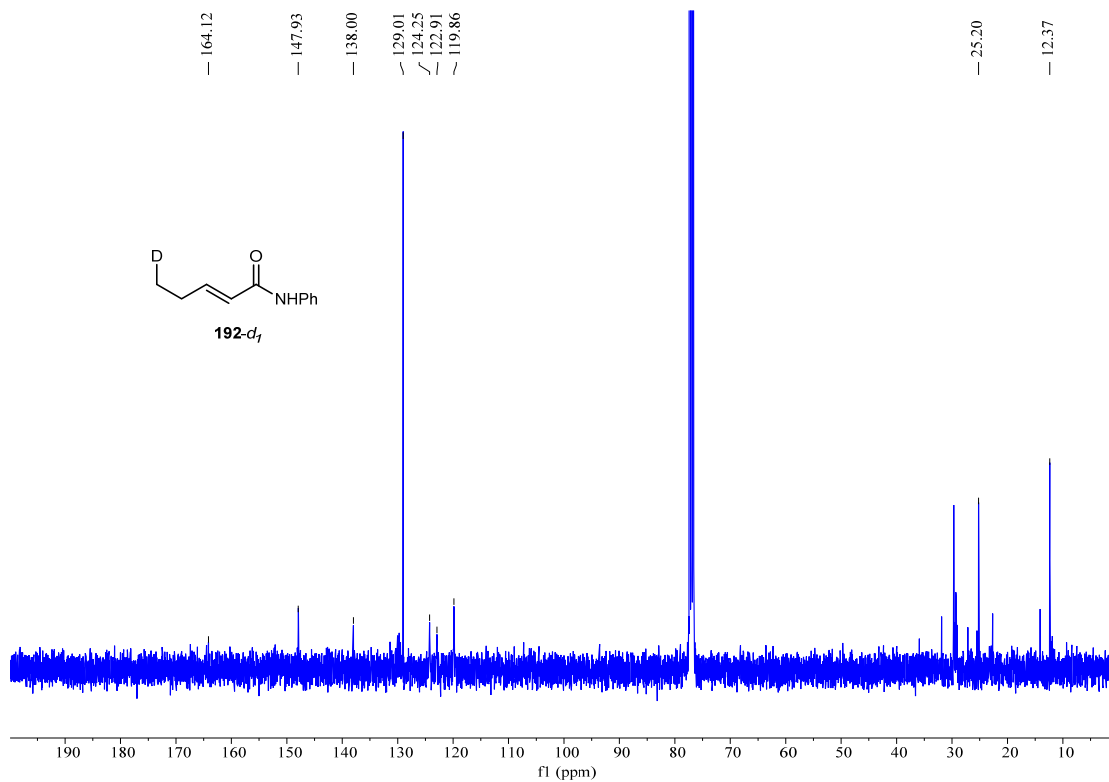

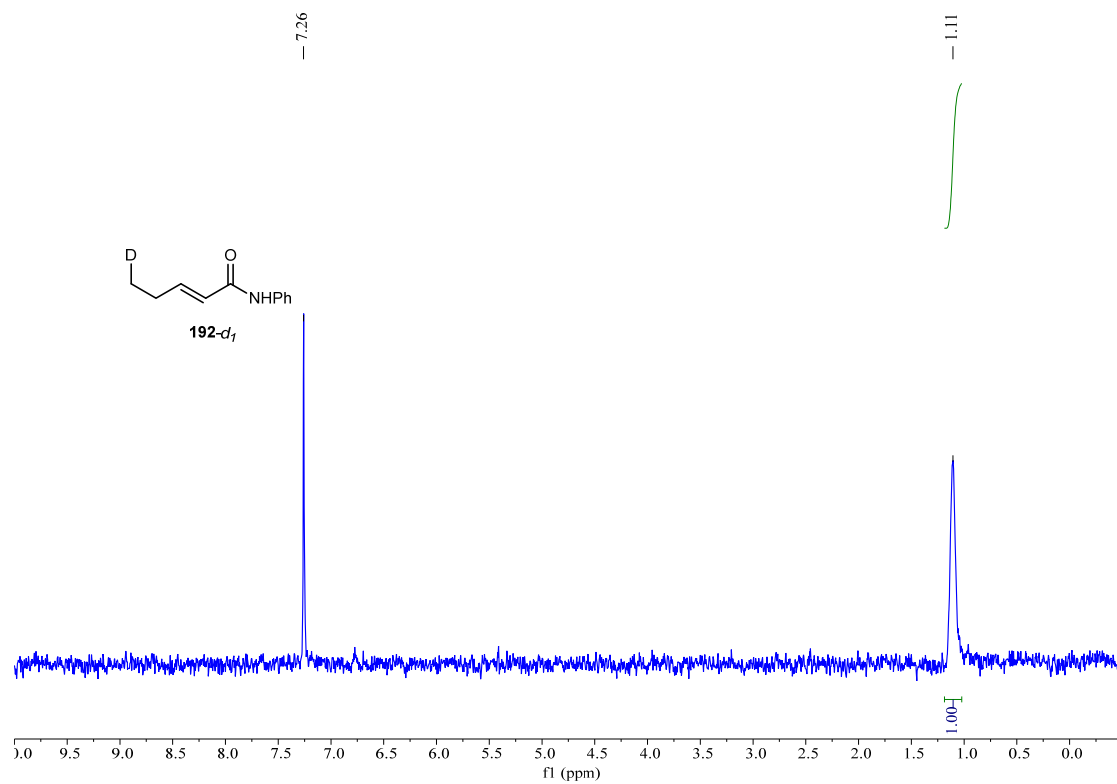

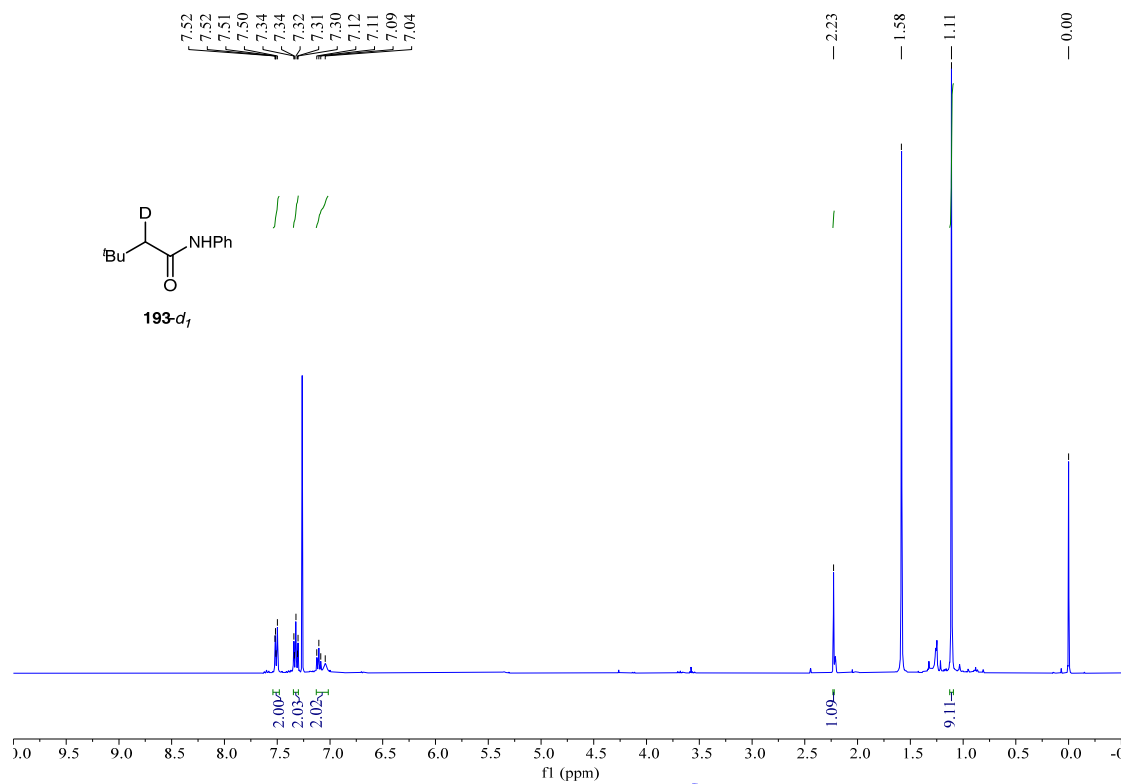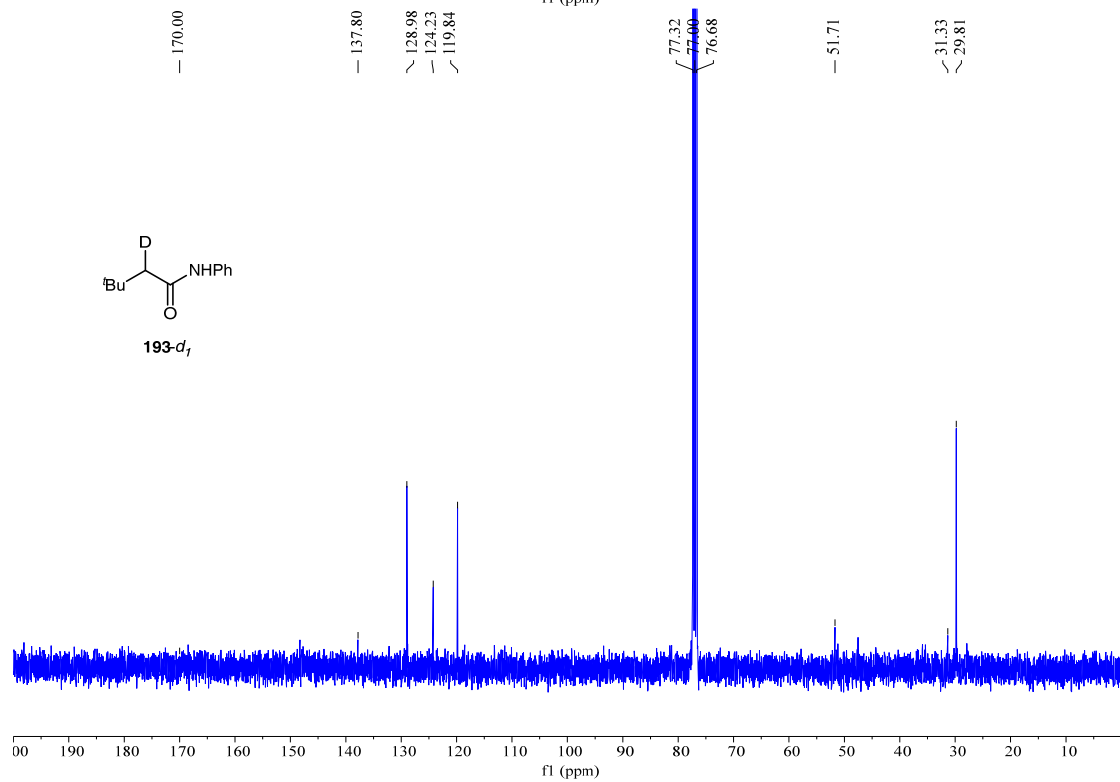

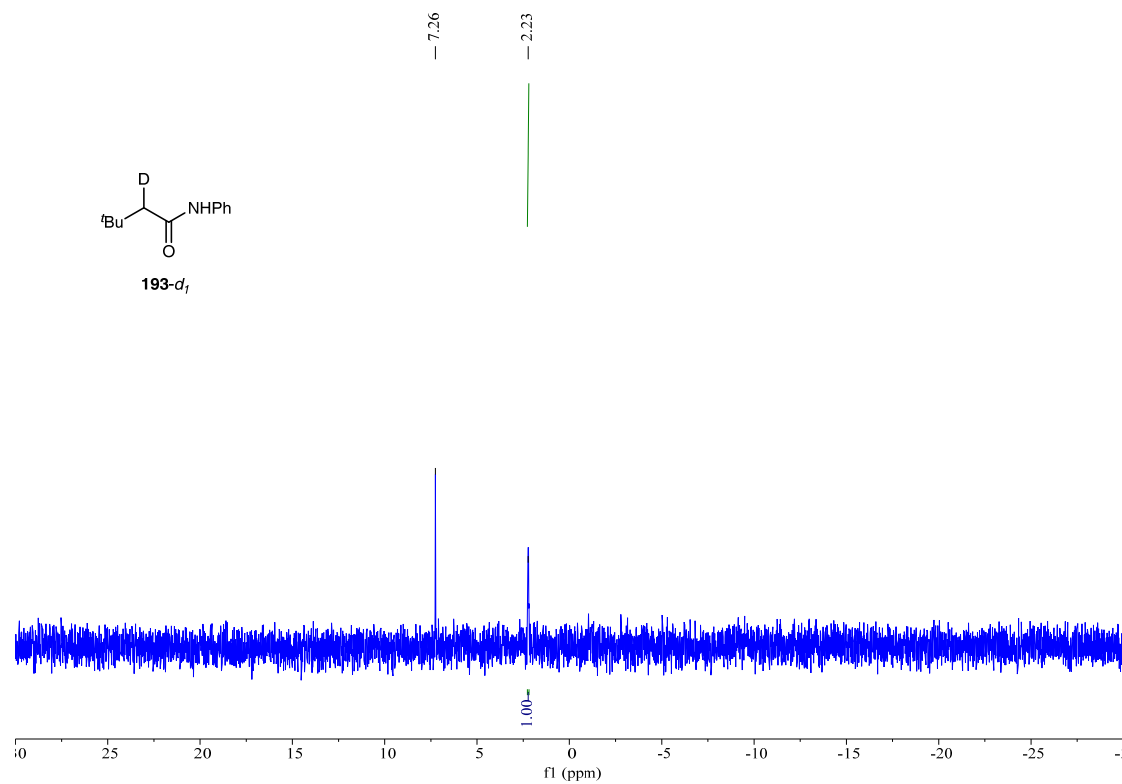

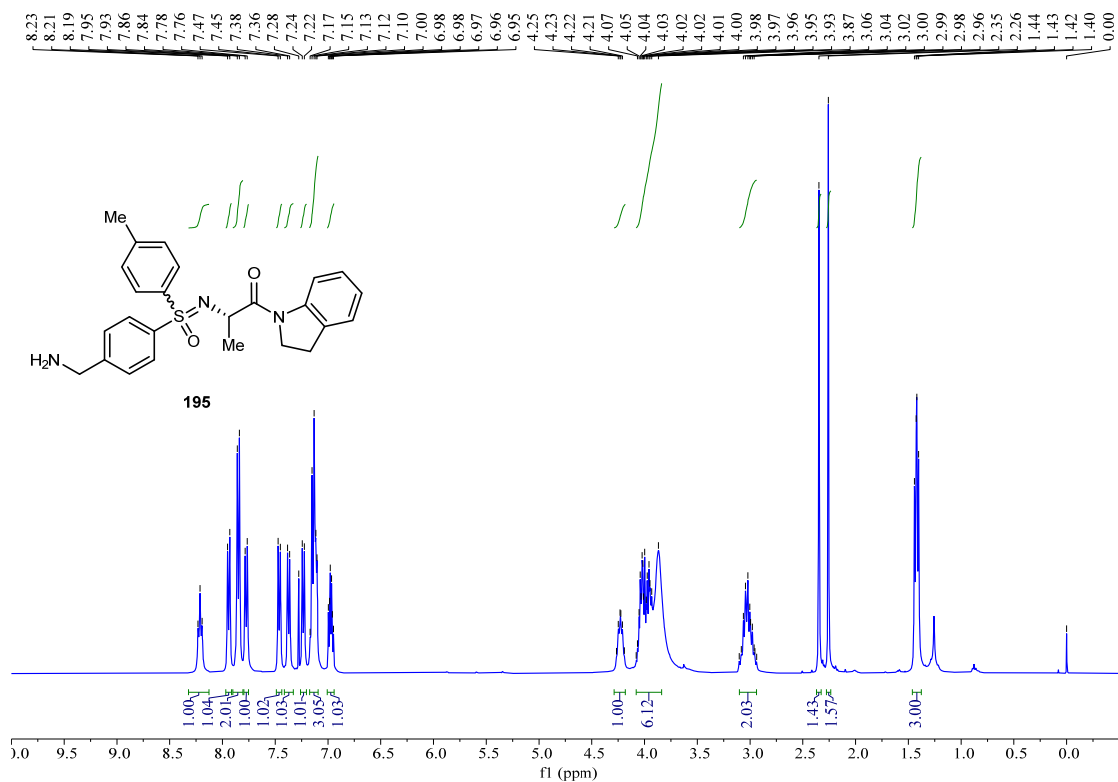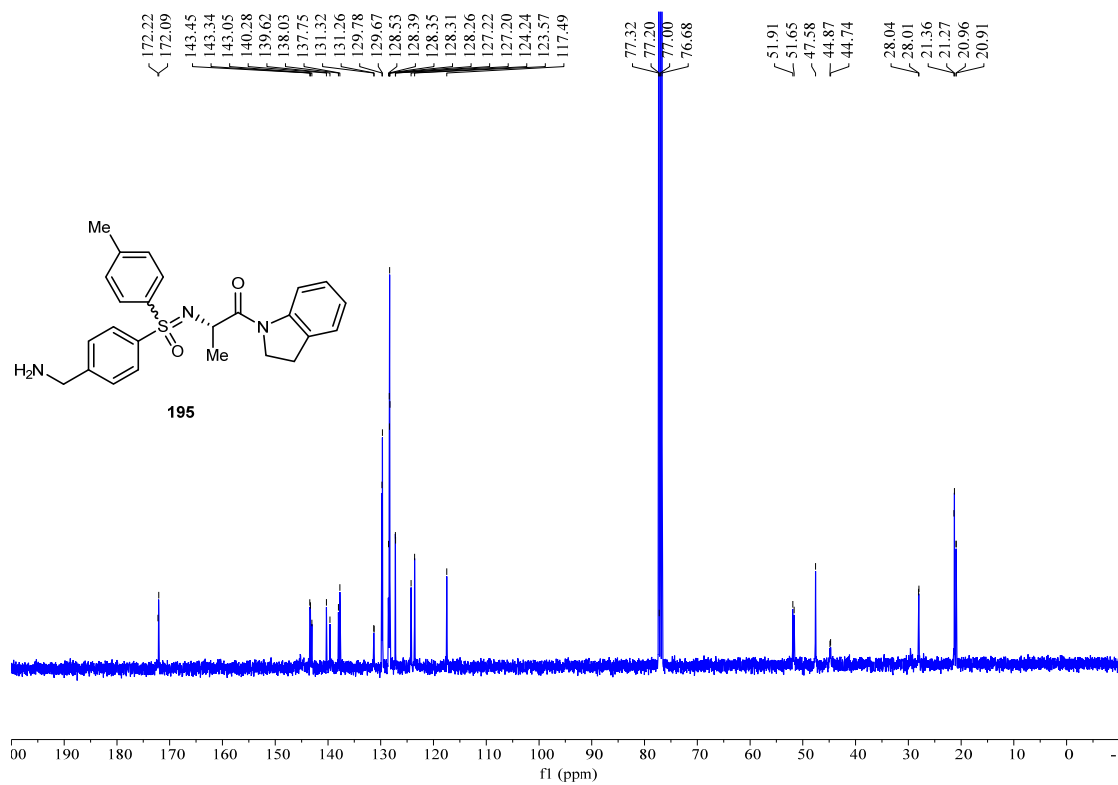



## 11. HPLC spectra

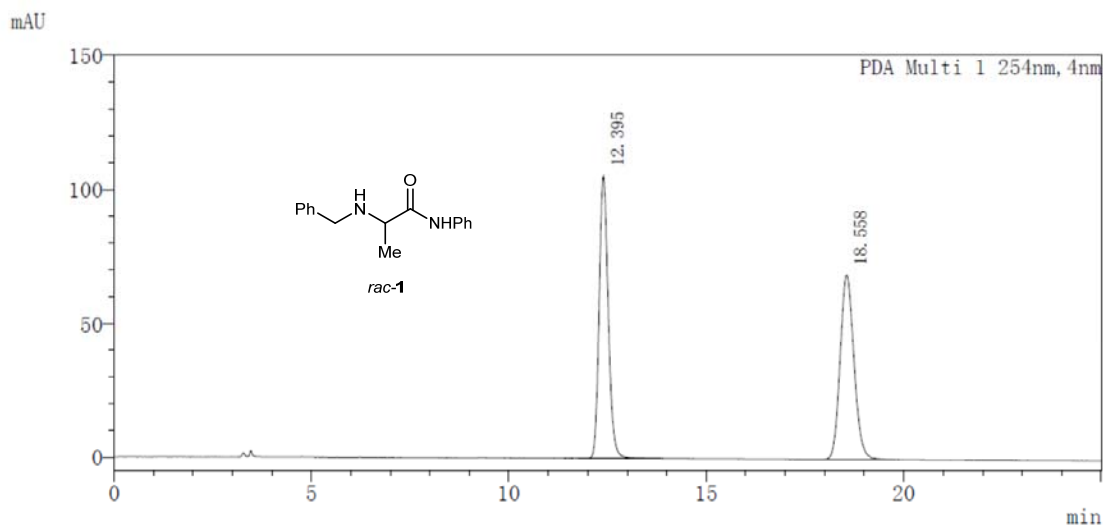

Peak Table

PDA Ch1 254nm

| Peak# | Ret. Time | Area    | Area%  |
|-------|-----------|---------|--------|
| 1     | 12.395    | 1683679 | 49.990 |
| 2     | 18.558    | 1684324 | 50.010 |

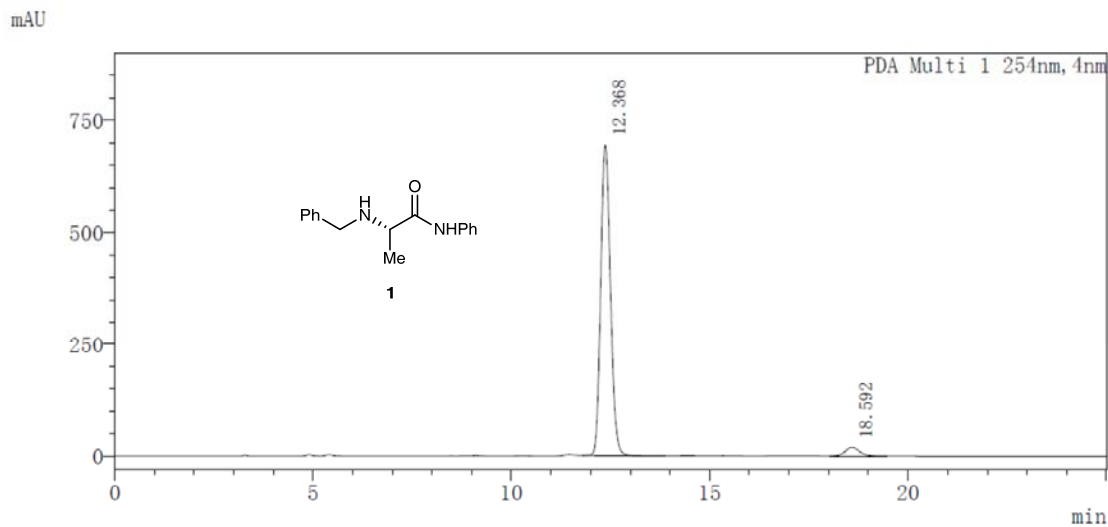

Peak Table

PDA Ch1 254nm

| Peak# | Ret. Time | Area     | Area%  |
|-------|-----------|----------|--------|
| 1     | 12.368    | 11857534 | 95.956 |
| 2     | 18.592    | 499666   | 4.044  |

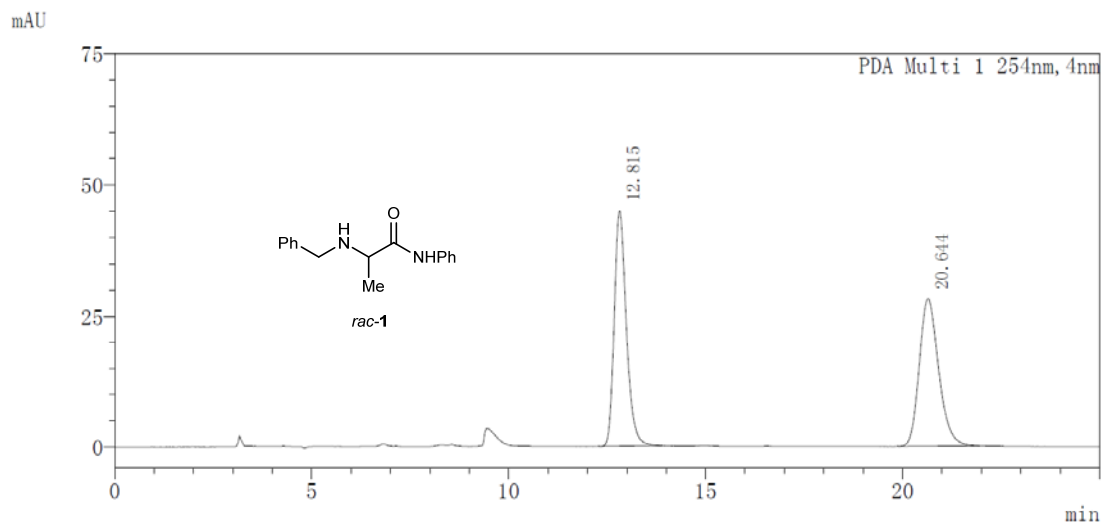

Peak Table

PDA Ch1 254nm

| Peak# | Ret. Time | Area   | Area%  |
|-------|-----------|--------|--------|
| 1     | 12.815    | 964273 | 49.986 |
| 2     | 20.644    | 964803 | 50.014 |

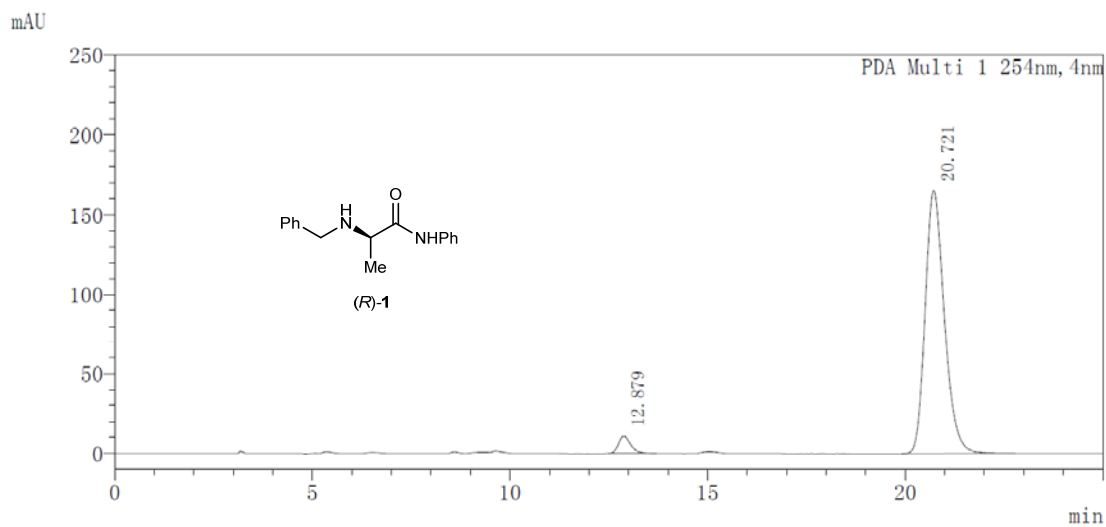

Peak Table

PDA Ch1 254nm

| Peak# | Ret. Time | Area    | Area%  |
|-------|-----------|---------|--------|
| 1     | 12.879    | 235905  | 4.064  |
| 2     | 20.721    | 5569068 | 95.936 |

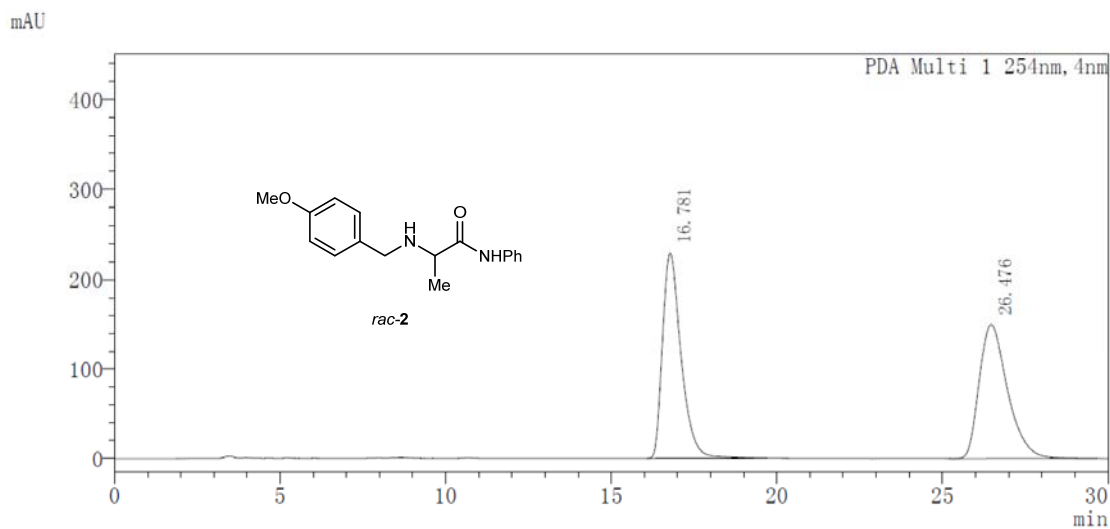

Peak Table

PDA Ch1 254nm

| Peak# | Ret. Time | Area    | Area%  |
|-------|-----------|---------|--------|
| 1     | 16.781    | 9001909 | 50.081 |
| 2     | 26.476    | 8972662 | 49.919 |

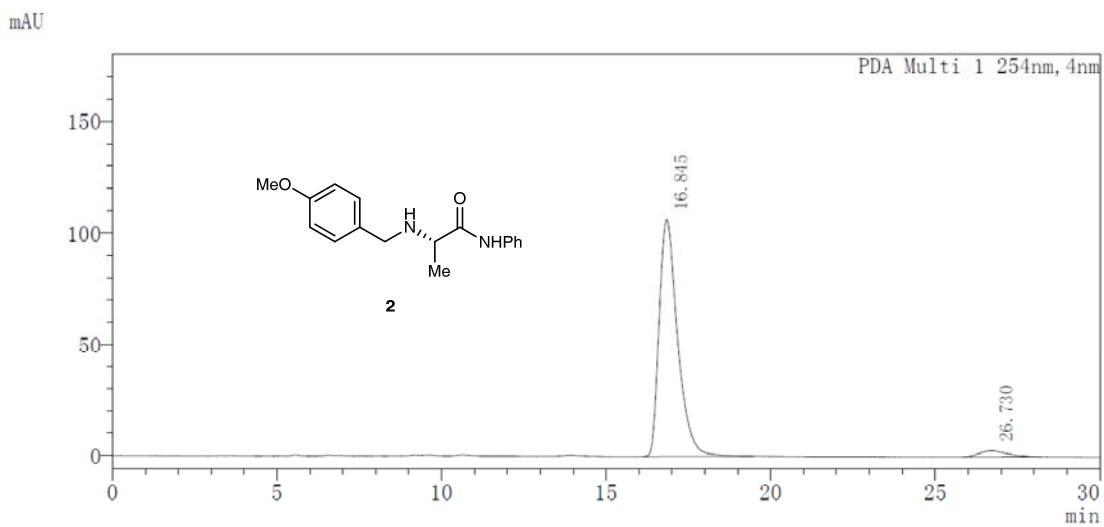

Peak Table

PDA Ch1 254nm

| Peak# | Ret. Time | Area    | Area%  |
|-------|-----------|---------|--------|
| 1     | 16.845    | 4184542 | 95.875 |
| 2     | 26.730    | 180038  | 4.125  |

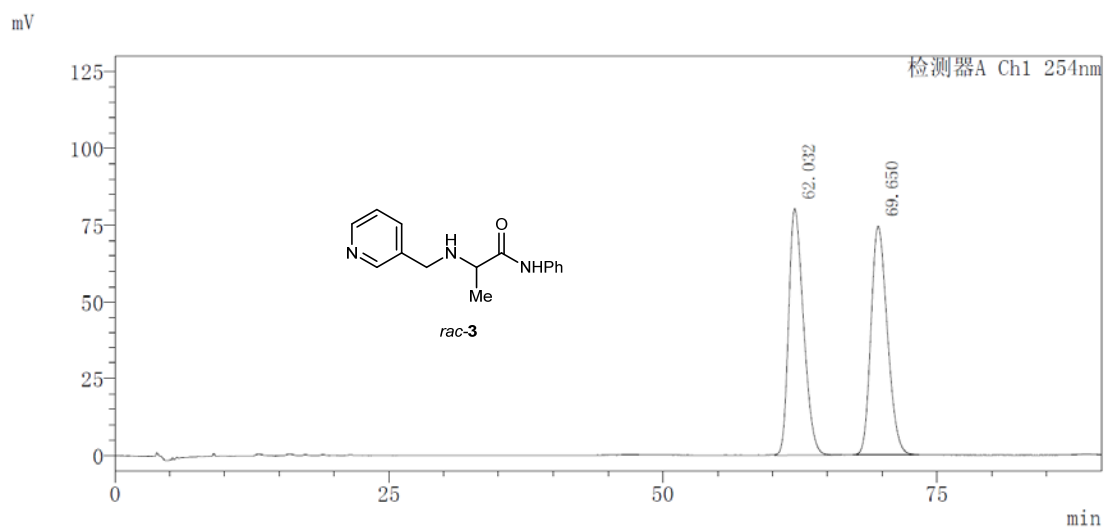

Peak Table

检测器A Ch1 254nm

| Peak# | Ret. Time | Area    | Area%  |
|-------|-----------|---------|--------|
| 1     | 62.032    | 7566028 | 49.368 |
| 2     | 69.650    | 7759695 | 50.632 |

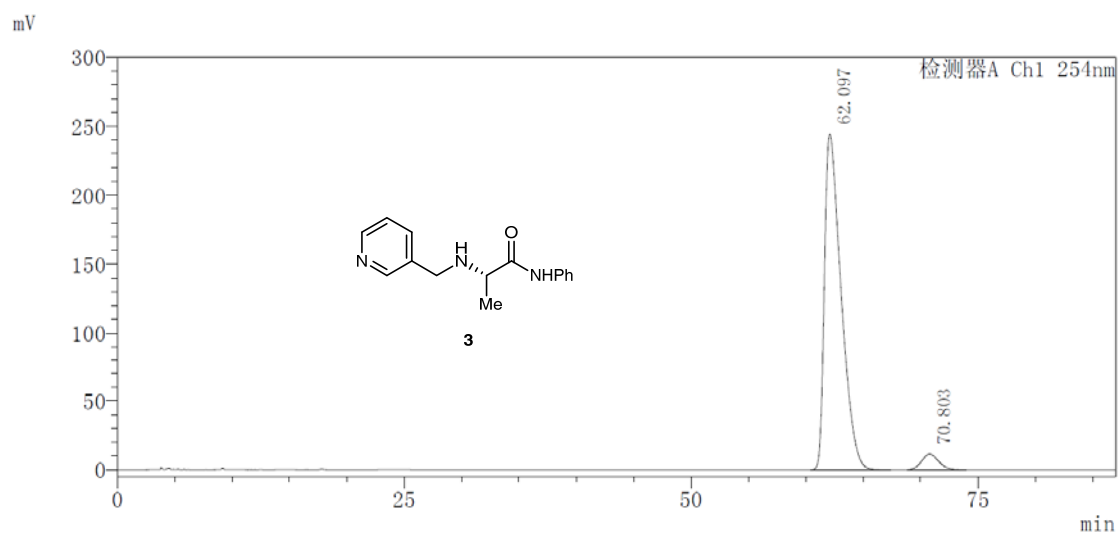

Peak Table

检测器A Ch1 254nm

| Peak# | Ret. Time | Area     | Area%  |
|-------|-----------|----------|--------|
| 1     | 62.097    | 24694597 | 95.456 |
| 2     | 70.803    | 1175631  | 4.544  |

mAU

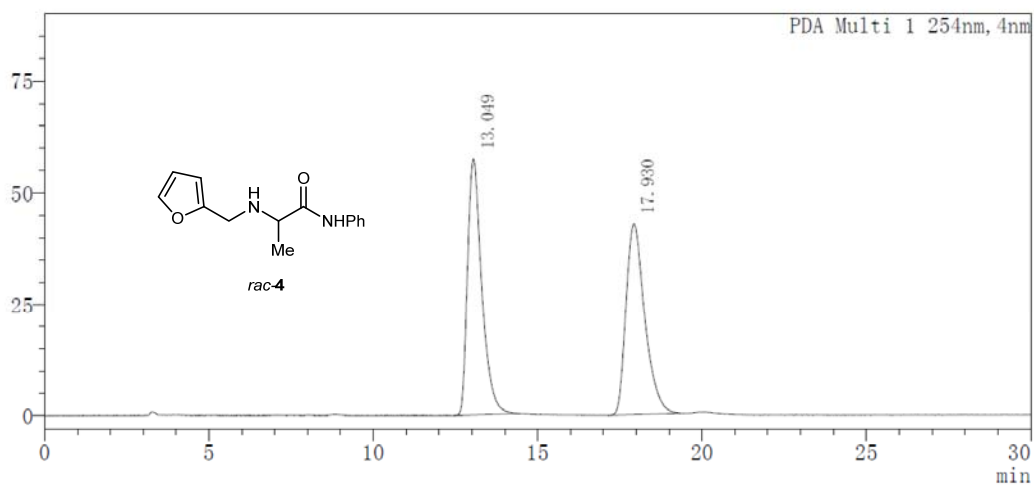

Peak Table

PDA Ch1 254nm

| Peak# | Ret. Time | Area    | Area%  |
|-------|-----------|---------|--------|
| 1     | 13.049    | 1747928 | 50.372 |
| 2     | 17.930    | 1722113 | 49.628 |

mAU

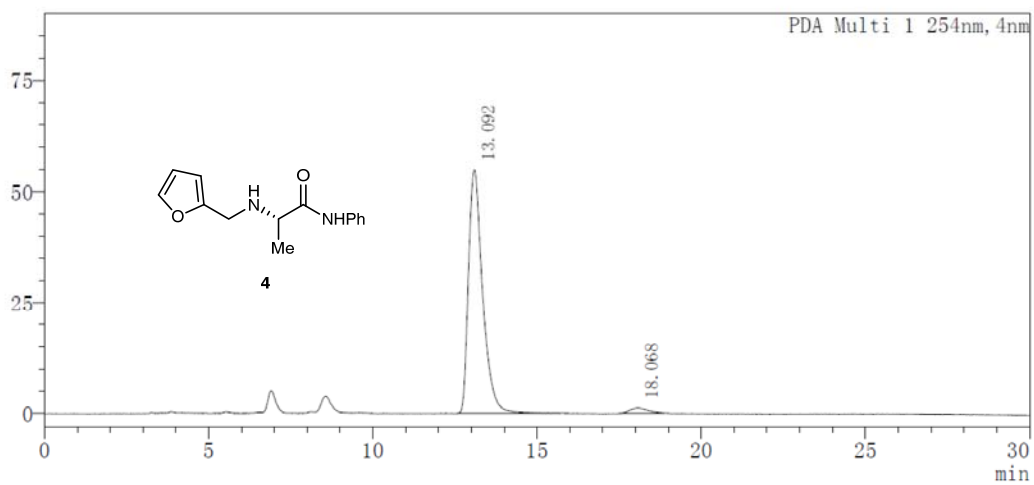

Peak Table

PDA Ch1 254nm

| Peak# | Ret. Time | Area    | Area%  |
|-------|-----------|---------|--------|
| 1     | 13.092    | 1659582 | 96.903 |
| 2     | 18.068    | 53039   | 3.097  |

mAU

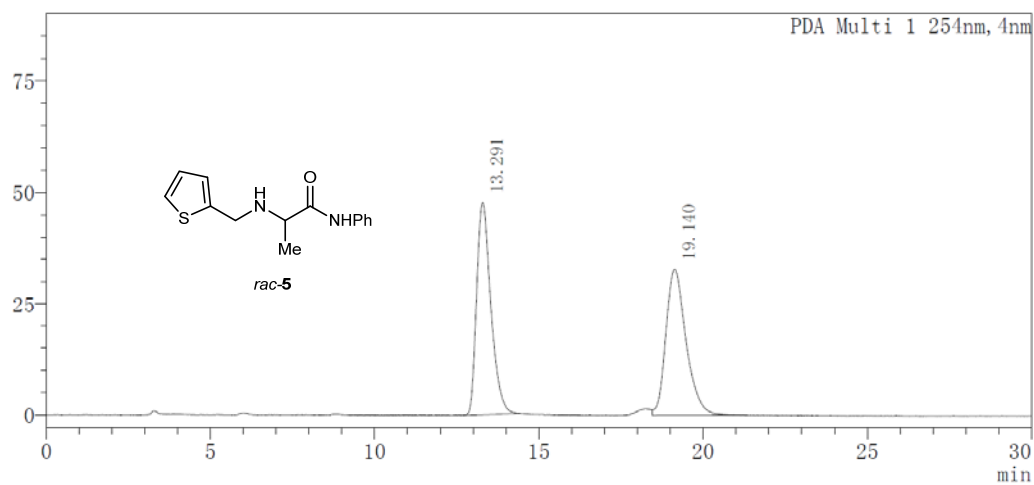

Peak Table

PDA Ch1 254nm

| Peak# | Ret. Time | Area    | Area%  |
|-------|-----------|---------|--------|
| 1     | 13.291    | 1449939 | 50.605 |
| 2     | 19.140    | 1415296 | 49.395 |

mAU

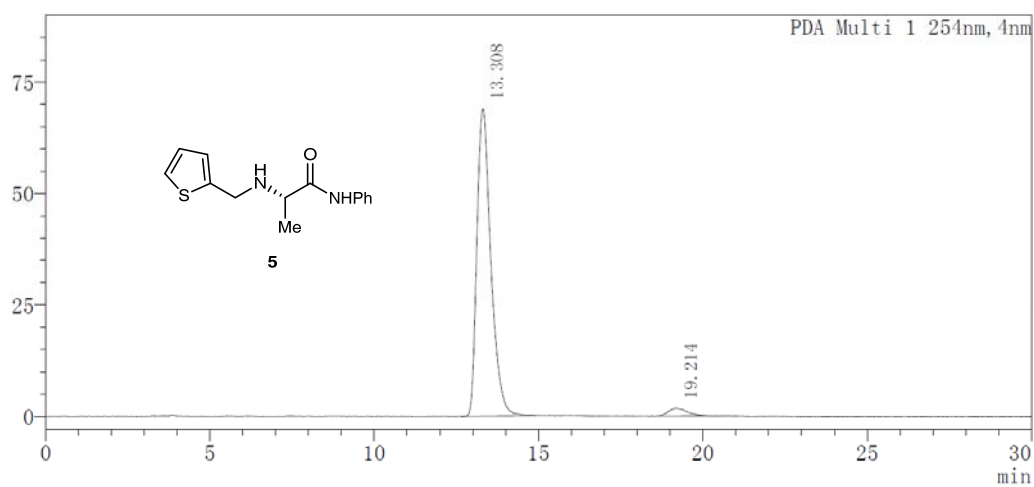

Peak Table

PDA Ch1 254nm

| Peak# | Ret. Time | Area    | Area%  |
|-------|-----------|---------|--------|
| 1     | 13.308    | 2061083 | 96.730 |
| 2     | 19.214    | 69682   | 3.270  |

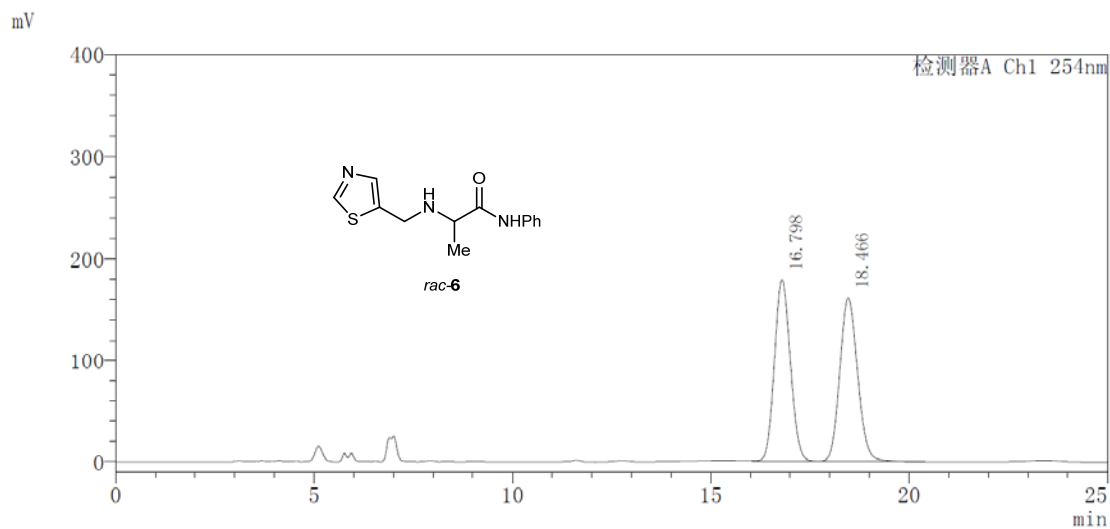

Peak Table

检测器A Ch1 254nm

| Peak# | Ret. Time | Area    | Area%  |
|-------|-----------|---------|--------|
| 1     | 16.798    | 5057959 | 49.809 |
| 2     | 18.466    | 5096849 | 50.191 |

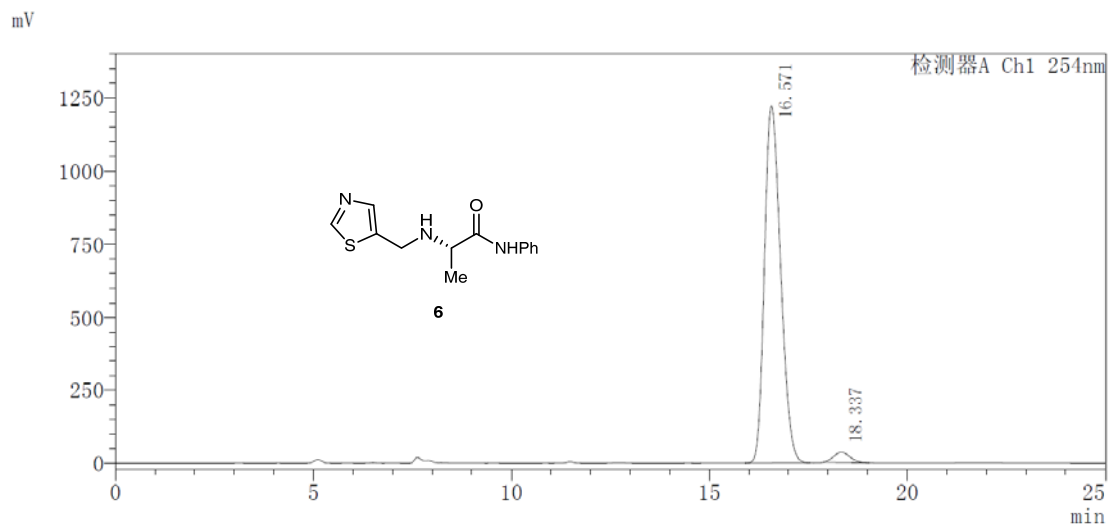

Peak Table

检测器A Ch1 254nm

| Peak# | Ret. Time | Area     | Area%  |
|-------|-----------|----------|--------|
| 1     | 16.571    | 34750848 | 97.194 |
| 2     | 18.337    | 1003241  | 2.806  |

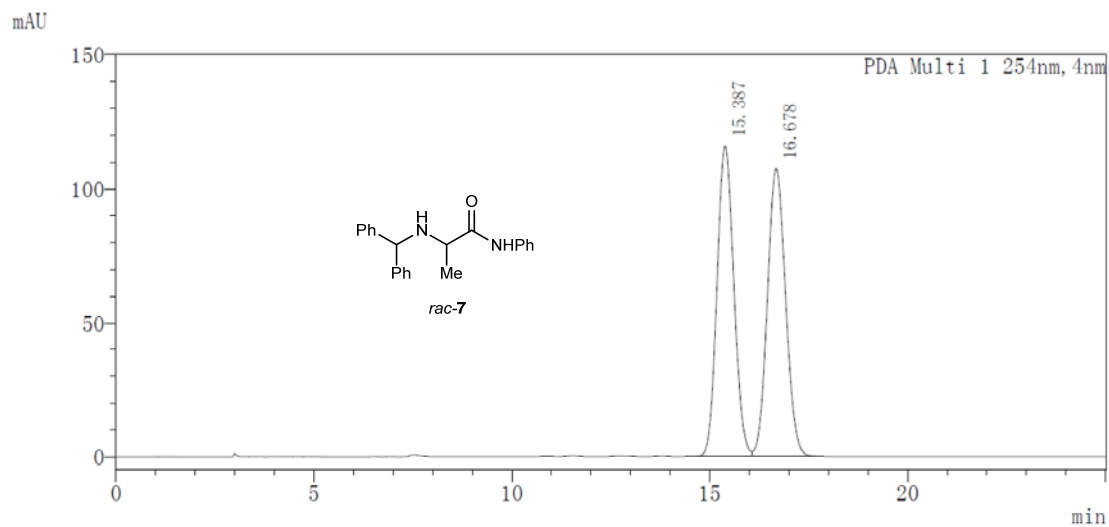

Peak Table

PDA Ch1 254nm

| Peak# | Ret. Time | Area    | Area%  |
|-------|-----------|---------|--------|
| 1     | 15.387    | 3417459 | 49.887 |
| 2     | 16.678    | 3432951 | 50.113 |

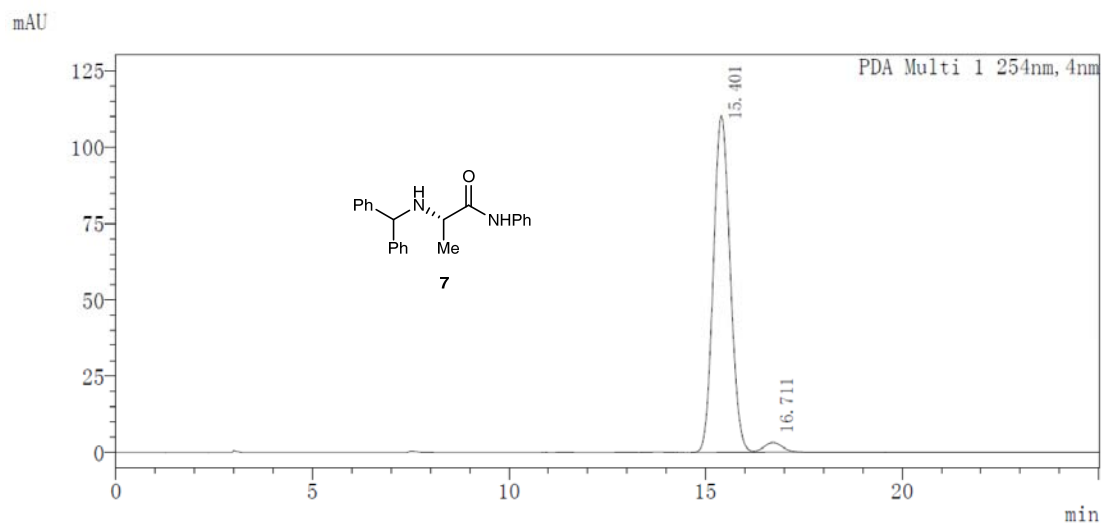

Peak Table

PDA Ch1 254nm

| Peak# | Ret. Time | Area    | Area%  |
|-------|-----------|---------|--------|
| 1     | 15.401    | 3263613 | 96.906 |
| 2     | 16.711    | 104192  | 3.094  |



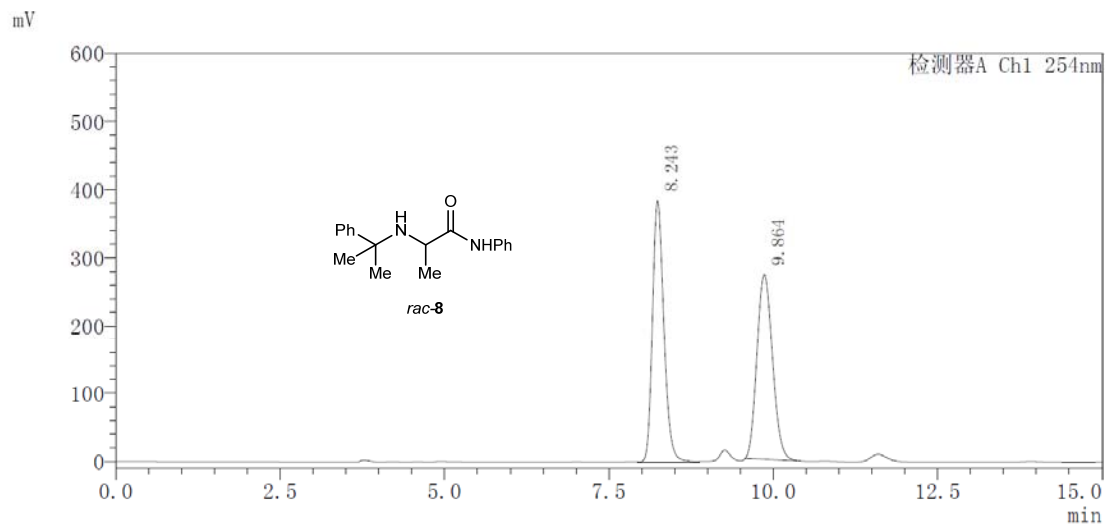

Peak Table

检测器A Ch1 254nm

| Peak# | Ret. Time | Area    | Area%  |
|-------|-----------|---------|--------|
| 1     | 8.243     | 4661202 | 50.963 |
| 2     | 9.864     | 4485124 | 49.037 |

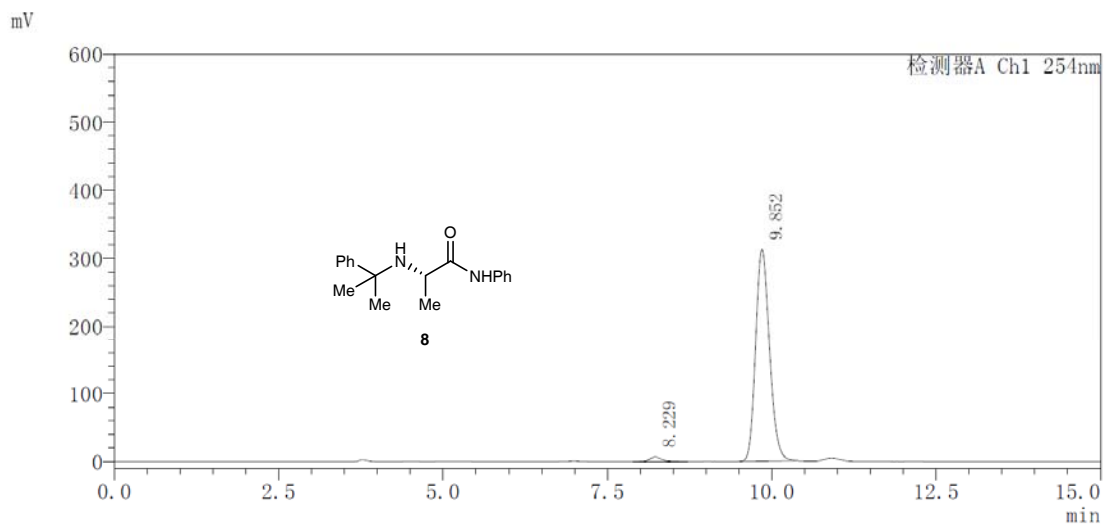

Peak Table

检测器A Ch1 254nm

| Peak# | Ret. Time | Area    | Area%  |
|-------|-----------|---------|--------|
| 1     | 8.229     | 87300   | 1.867  |
| 2     | 9.852     | 4589308 | 98.133 |

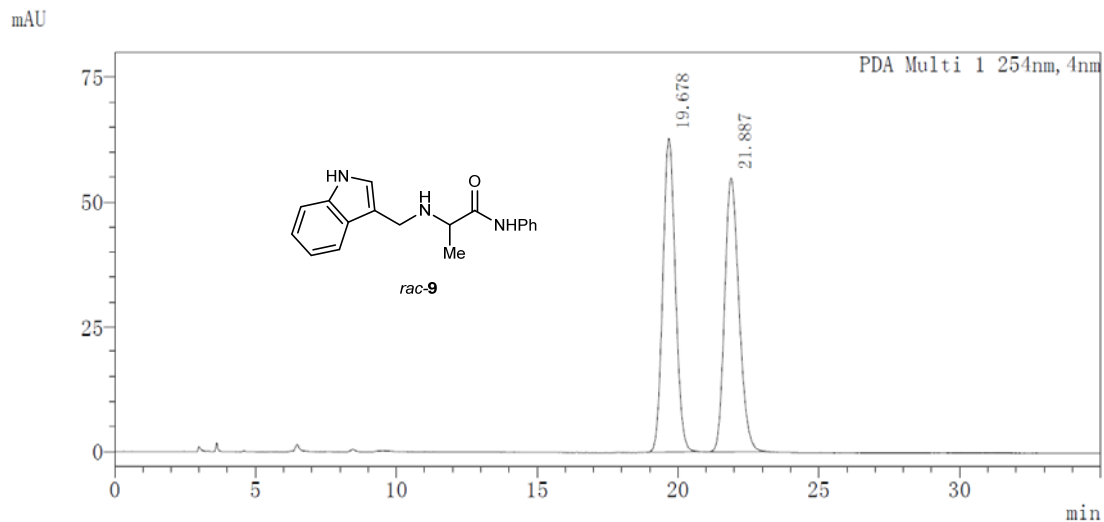

Peak Table

PDA Ch1 254nm

| Peak# | Ret. Time | Area    | Area%  |
|-------|-----------|---------|--------|
| 1     | 19.678    | 1952868 | 50.067 |
| 2     | 21.887    | 1947663 | 49.933 |

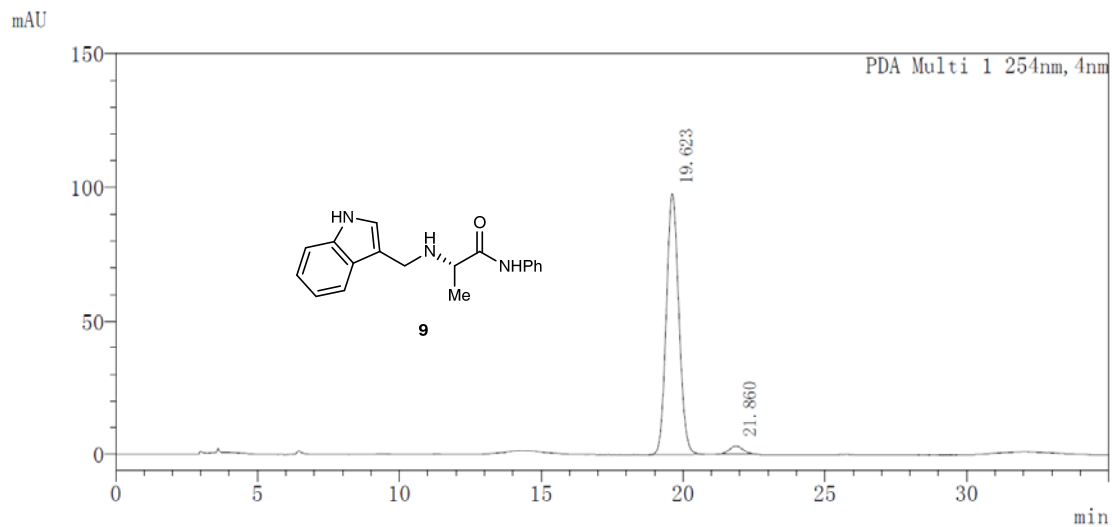

Peak Table

PDA Ch1 254nm

| Peak# | Ret. Time | Area    | Area%  |
|-------|-----------|---------|--------|
| 1     | 19.623    | 3002214 | 96.581 |
| 2     | 21.860    | 106284  | 3.419  |

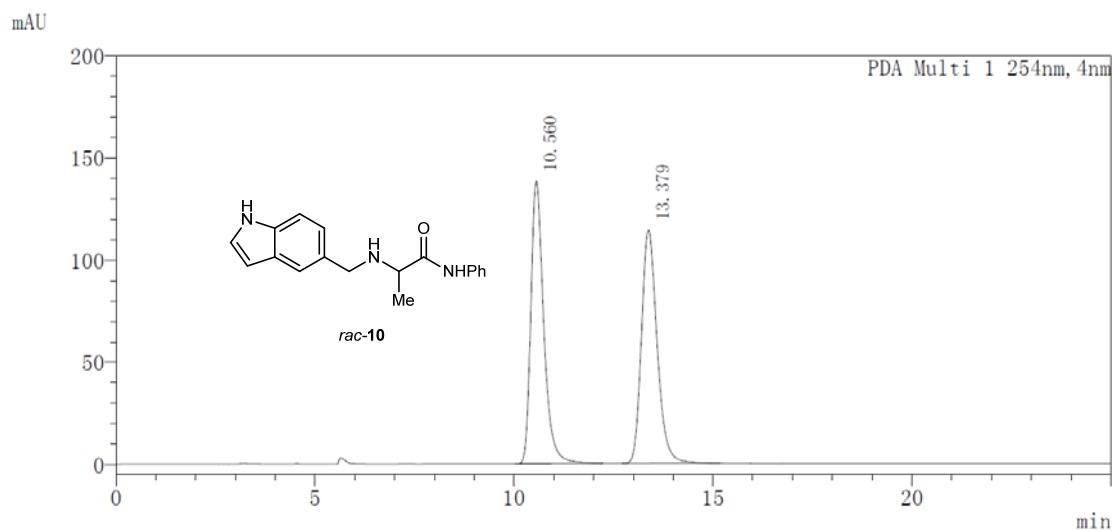

Peak Table

PDA Ch1 254nm

| Peak# | Ret. Time | Area    | Area%  |
|-------|-----------|---------|--------|
| 1     | 10.560    | 3117244 | 49.955 |
| 2     | 13.379    | 3122801 | 50.045 |

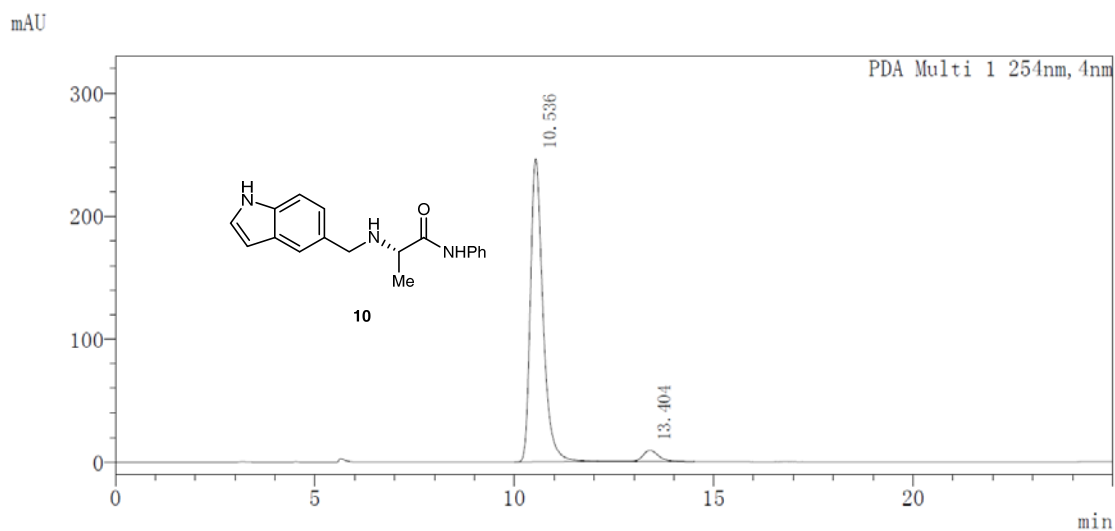

Peak Table

PDA Ch1 254nm

| Peak# | Ret. Time | Area    | Area%  |
|-------|-----------|---------|--------|
| 1     | 10.536    | 5403435 | 95.447 |
| 2     | 13.404    | 257741  | 4.553  |

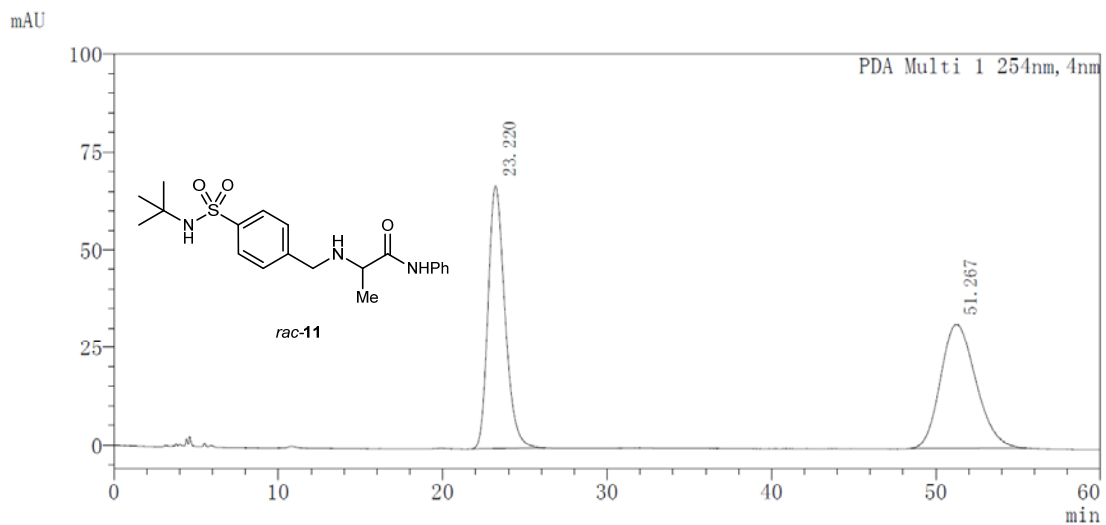

Peak Table

PDA Ch1 254nm

| Peak# | Ret. Time | Area    | Area%  |
|-------|-----------|---------|--------|
| 1     | 23.220    | 4777237 | 50.163 |
| 2     | 51.267    | 4746172 | 49.837 |

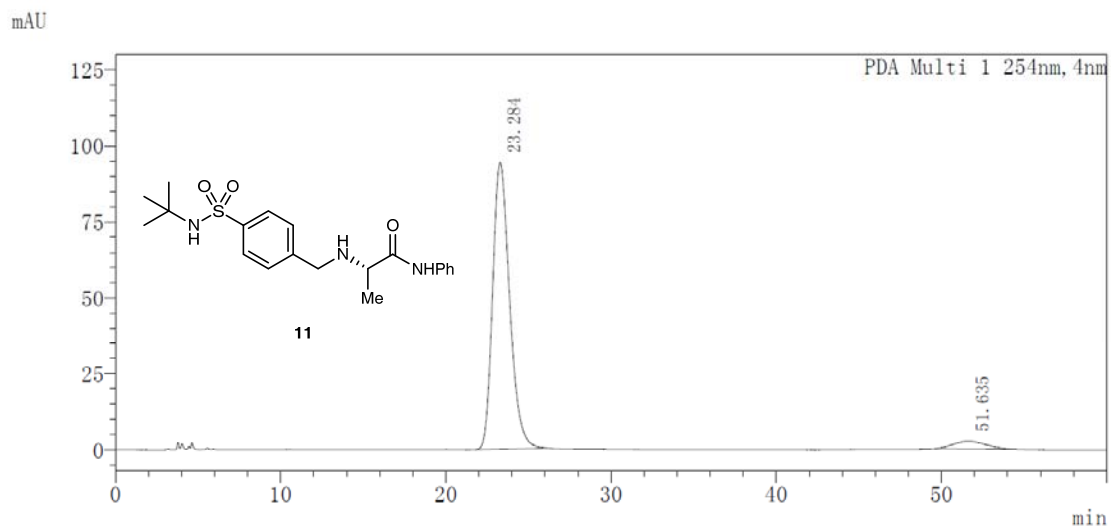

Peak Table

PDA Ch1 254nm

| Peak# | Ret. Time | Area    | Area%  |
|-------|-----------|---------|--------|
| 1     | 23.284    | 6733160 | 95.002 |
| 2     | 51.635    | 354227  | 4.998  |

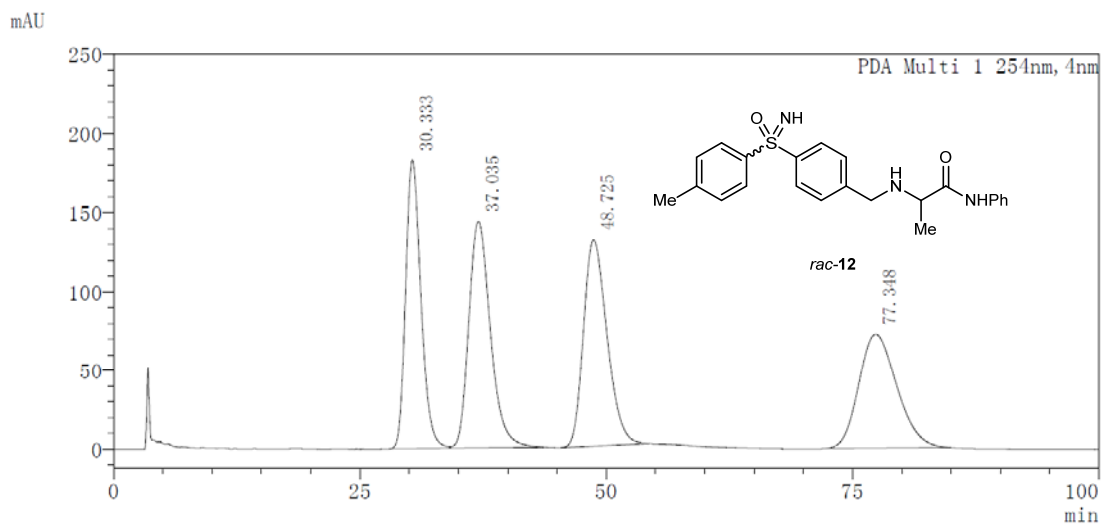

Peak Table

PDA Ch1 254nm

| Peak# | Ret. Time | Area     | Area%  |
|-------|-----------|----------|--------|
| 1     | 30.333    | 19795258 | 23.800 |
| 2     | 37.035    | 22002380 | 26.454 |
| 3     | 48.725    | 21869703 | 26.294 |
| 4     | 77.348    | 19504868 | 23.451 |

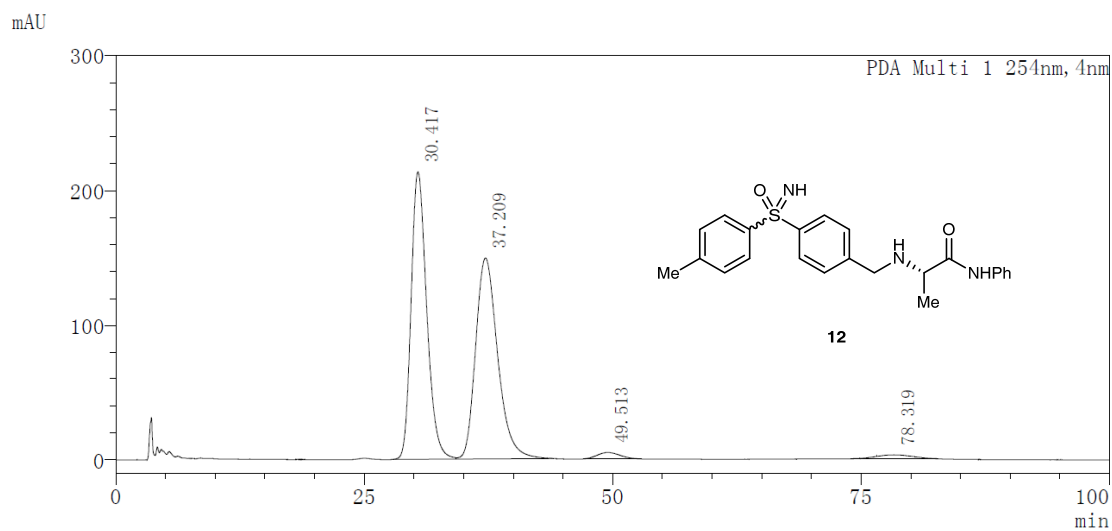

Peak Table

PDA Ch1 254nm

| Peak# | Ret. Time | Area     | Area%  |
|-------|-----------|----------|--------|
| 1     | 30.417    | 23337575 | 48.714 |
| 2     | 37.209    | 23067487 | 48.150 |
| 3     | 49.513    | 761885   | 1.590  |
| 4     | 78.319    | 740152   | 1.545  |

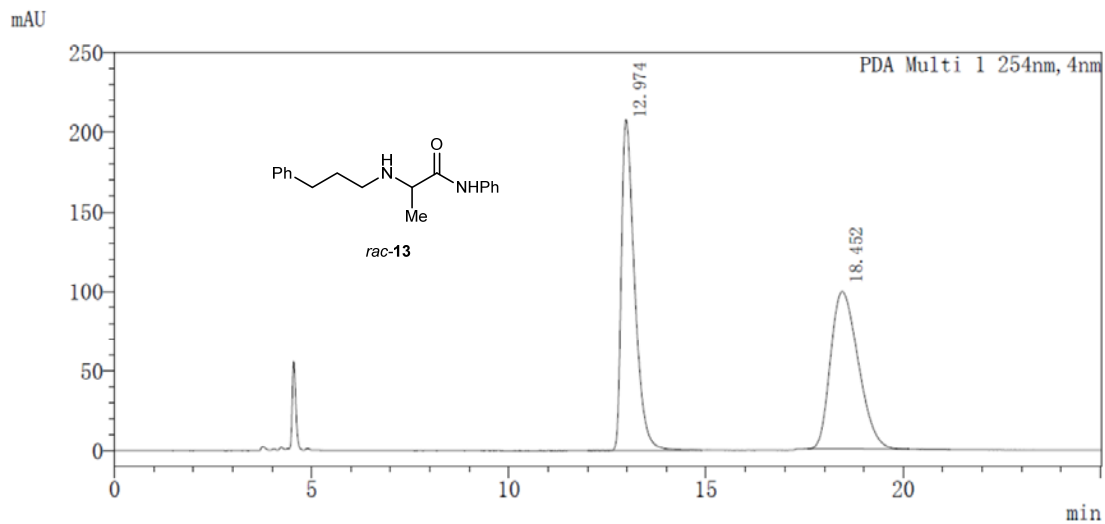

Peak Table

PDA Ch1 254nm

| Peak# | Ret. Time | Area    | Area%  |
|-------|-----------|---------|--------|
| 1     | 12.974    | 4841221 | 49.963 |
| 2     | 18.452    | 4848488 | 50.037 |

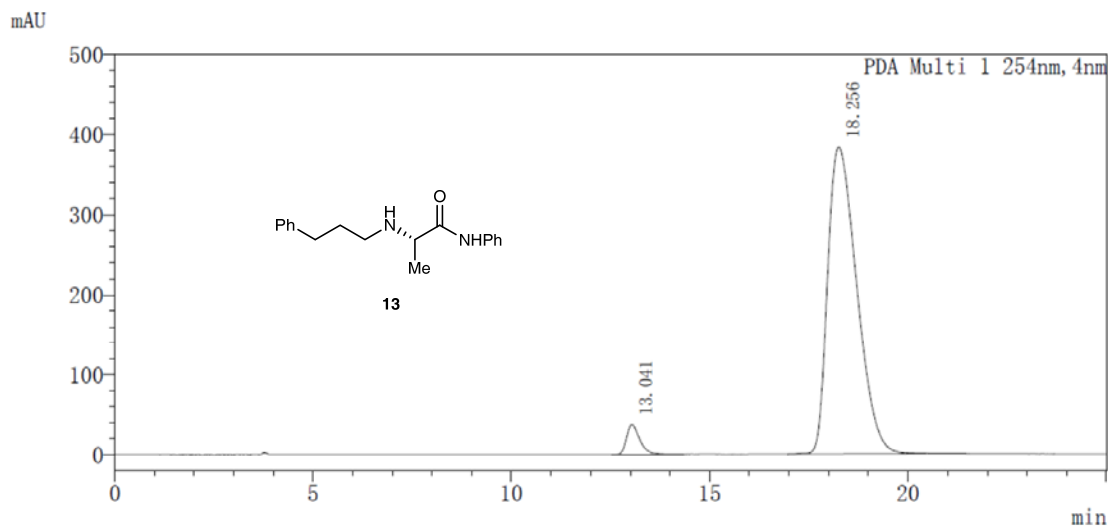

Peak Table

PDA Ch1 254nm

| Peak# | Ret. Time | Area     | Area%  |
|-------|-----------|----------|--------|
| 1     | 13.041    | 861953   | 4.215  |
| 2     | 18.256    | 19588797 | 95.785 |

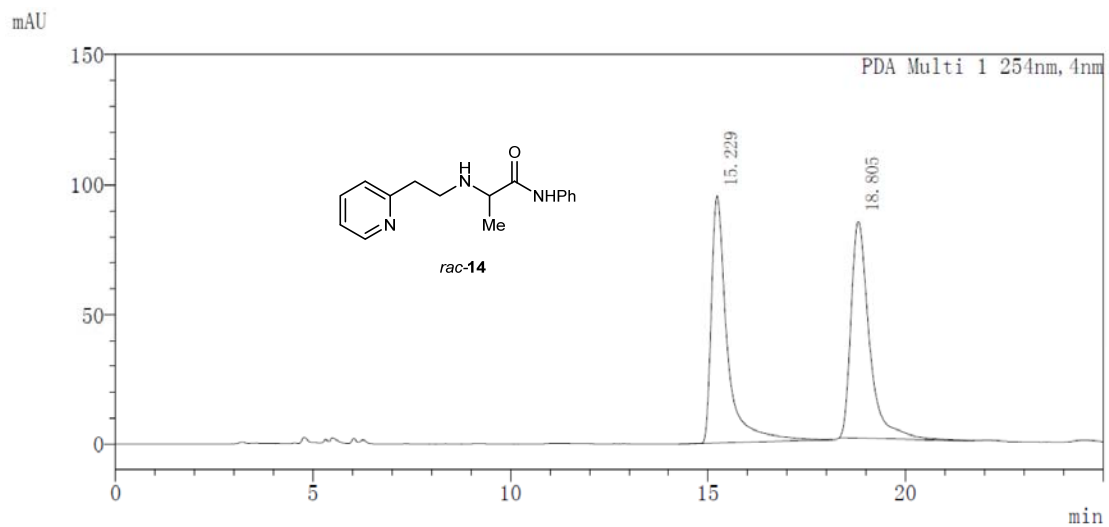

Peak Table

PDA Ch1 254nm

| Peak# | Ret. Time | Area    | Area%  |
|-------|-----------|---------|--------|
| 1     | 15.229    | 2658649 | 49.512 |
| 2     | 18.805    | 2711092 | 50.488 |

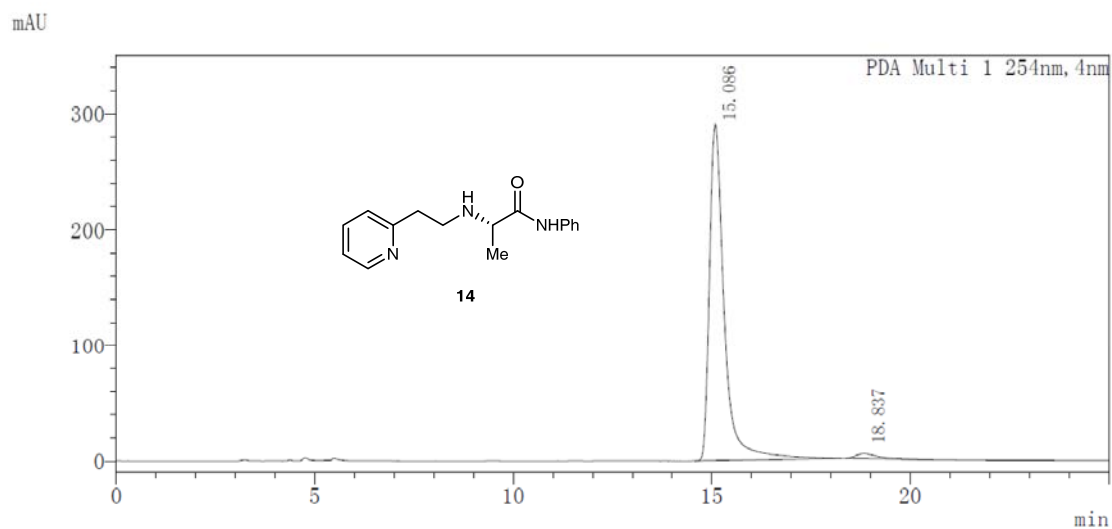

Peak Table

PDA Ch1 254nm

| Peak# | Ret. Time | Area    | Area%  |
|-------|-----------|---------|--------|
| 1     | 15.086    | 7566308 | 97.917 |
| 2     | 18.837    | 160964  | 2.083  |

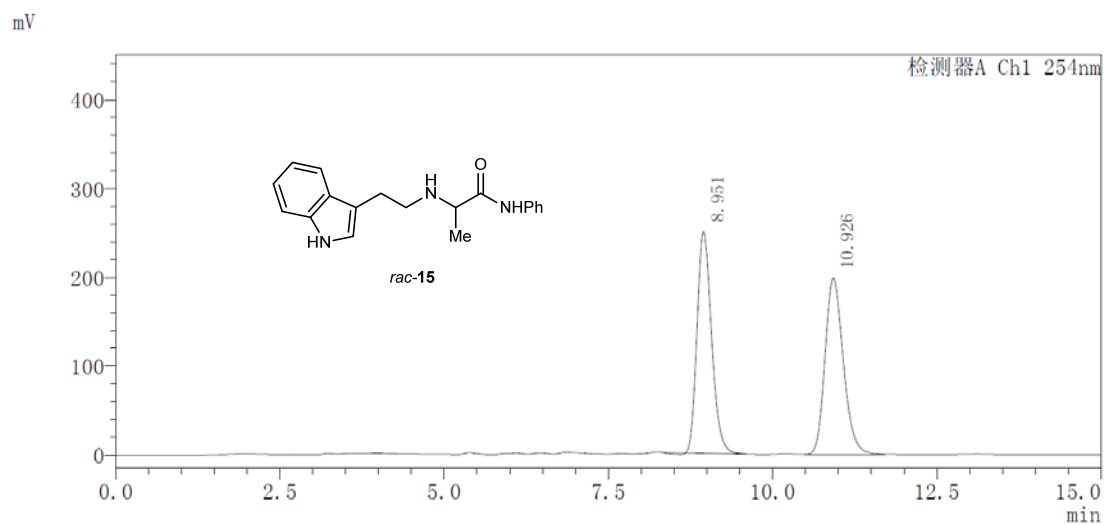

Peak Table

检测器A Ch1 254nm

| Peak# | Ret. Time | Area    | Area%  |
|-------|-----------|---------|--------|
| 1     | 8.951     | 3757680 | 49.429 |
| 2     | 10.926    | 3844520 | 50.571 |

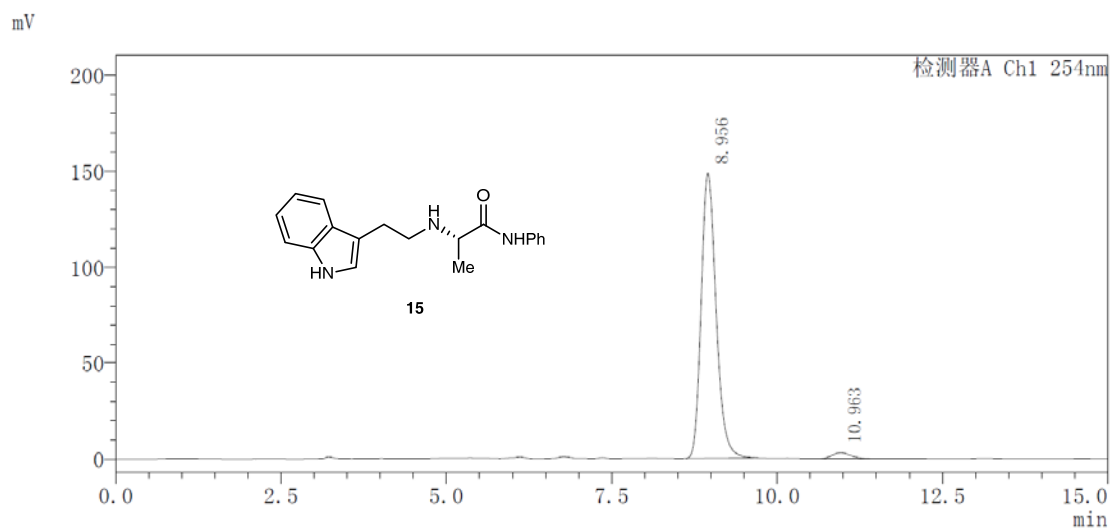

Peak Table

检测器A Ch1 254nm

| Peak# | Ret. Time | Area    | Area%  |
|-------|-----------|---------|--------|
| 1     | 8.956     | 2301141 | 97.424 |
| 2     | 10.963    | 60843   | 2.576  |



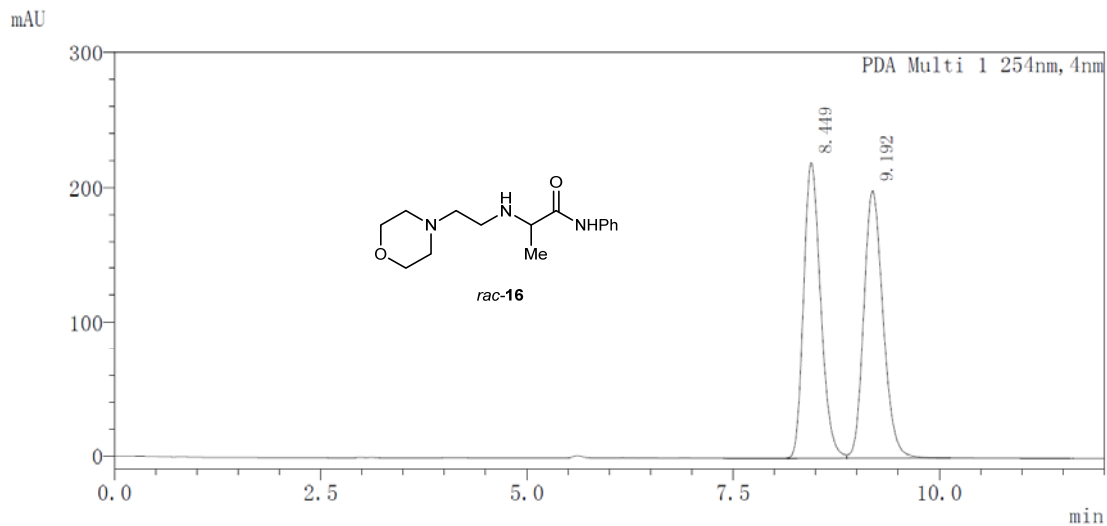

Peak Table

PDA Ch1 254nm

| Peak# | Ret. Time | Area    | Area%  |
|-------|-----------|---------|--------|
| 1     | 8.449     | 3173077 | 49.444 |
| 2     | 9.192     | 3244447 | 50.556 |

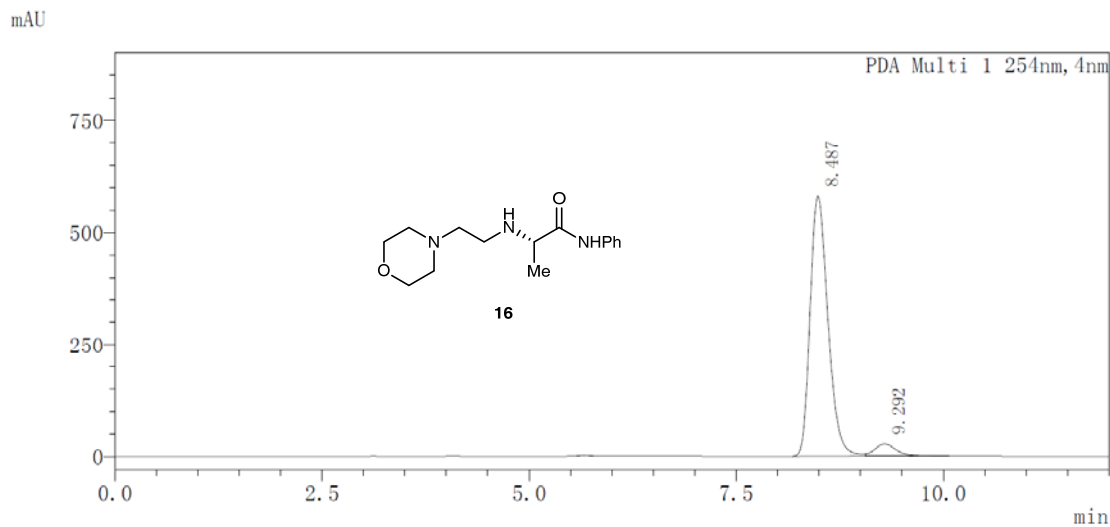

Peak Table

PDA Ch1 254nm

| Peak# | Ret. Time | Area    | Area%  |
|-------|-----------|---------|--------|
| 1     | 8.487     | 8711969 | 94.616 |
| 2     | 9.292     | 495760  | 5.384  |

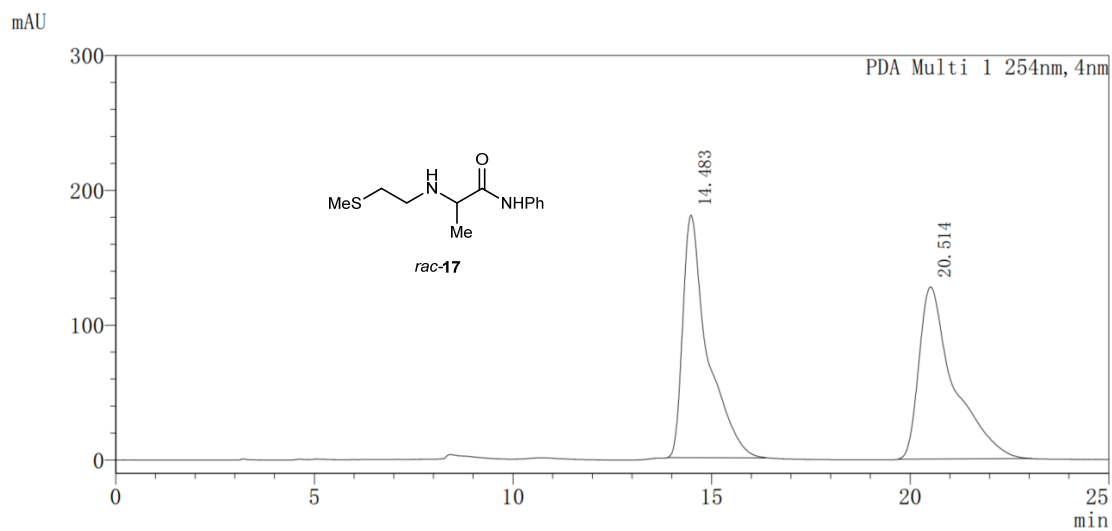

Peak Table

PDA Ch1 254nm

| Peak# | Ret. Time | Area    | Area%  |
|-------|-----------|---------|--------|
| 1     | 14.483    | 7817462 | 50.014 |
| 2     | 20.514    | 7813187 | 49.986 |

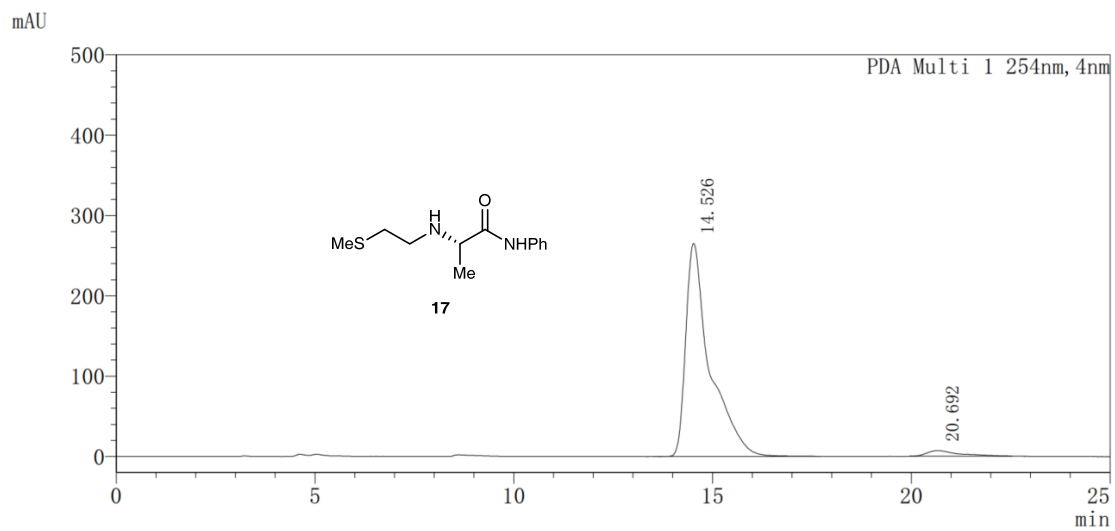

Peak Table

PDA Ch1 254nm

| Peak# | Ret. Time | Area     | Area%  |
|-------|-----------|----------|--------|
| 1     | 14.526    | 11263530 | 96.606 |
| 2     | 20.692    | 395758   | 3.394  |

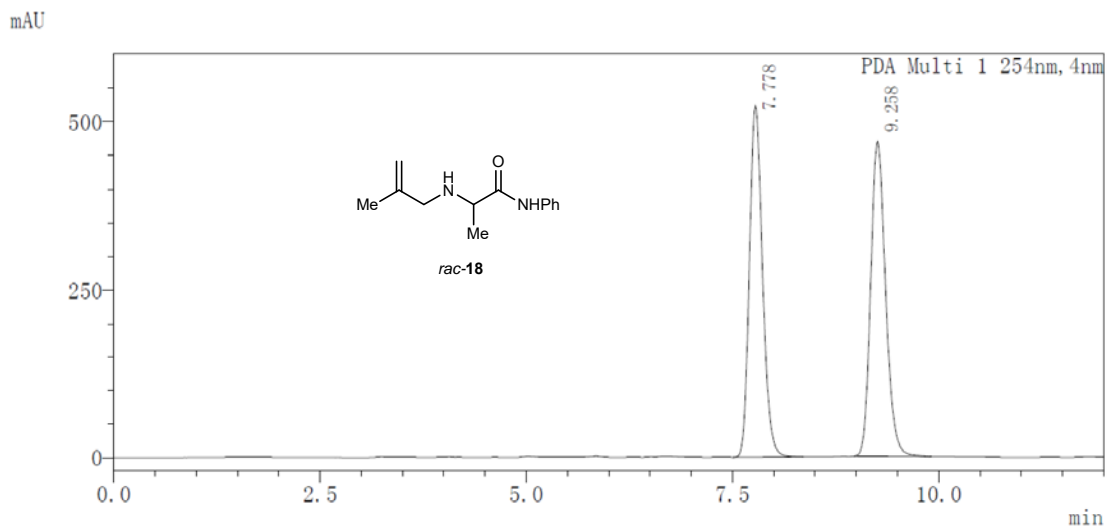

Peak Table

PDA Ch1 254nm

| Peak# | Ret. Time | Area    | Area%  |
|-------|-----------|---------|--------|
| 1     | 7.778     | 5796746 | 49.517 |
| 2     | 9.258     | 5909911 | 50.483 |

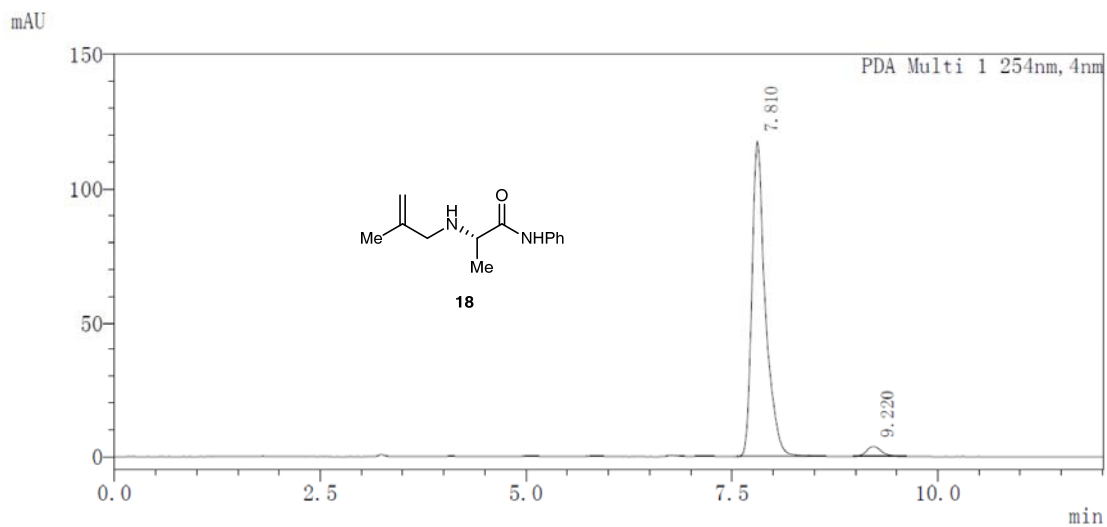

Peak Table

PDA Ch1 254nm

| Peak# | Ret. Time | Area    | Area%  |
|-------|-----------|---------|--------|
| 1     | 7.810     | 1338204 | 96.658 |
| 2     | 9.220     | 46266   | 3.342  |

mV

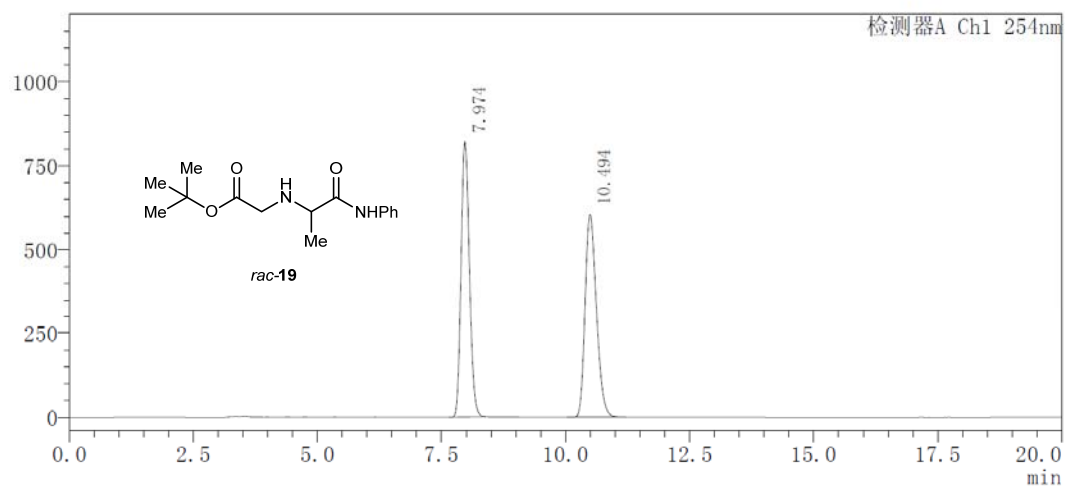

Peak Table

检测器A Ch1 254nm

| Peak# | Ret. Time | Area    | Area%  |
|-------|-----------|---------|--------|
| 1     | 7.974     | 9505155 | 49.714 |
| 2     | 10.494    | 9614642 | 50.286 |

mV

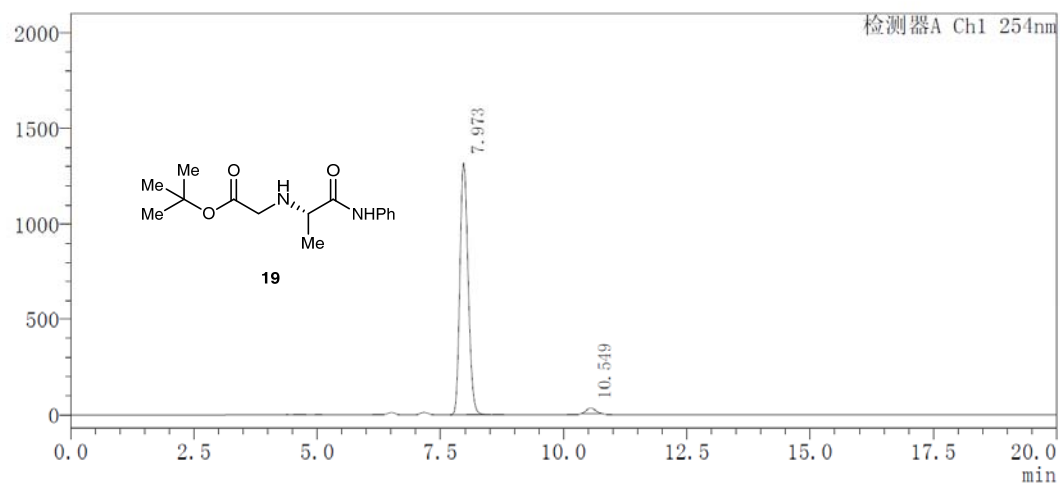

Peak Table

检测器A Ch1 254nm

| Peak# | Ret. Time | Area     | Area%  |
|-------|-----------|----------|--------|
| 1     | 7.973     | 15149423 | 97.276 |
| 2     | 10.549    | 424218   | 2.724  |

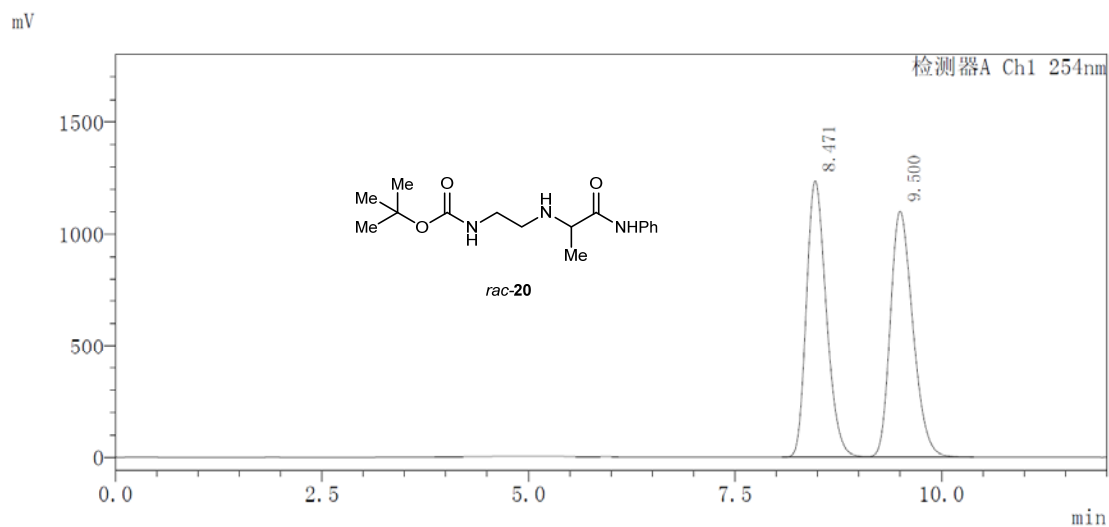

Peak Table

检测器A Ch1 254nm

| Peak# | Ret. Time | Area     | Area%  |
|-------|-----------|----------|--------|
| 1     | 8.471     | 20678299 | 49.799 |
| 2     | 9.500     | 20844978 | 50.201 |

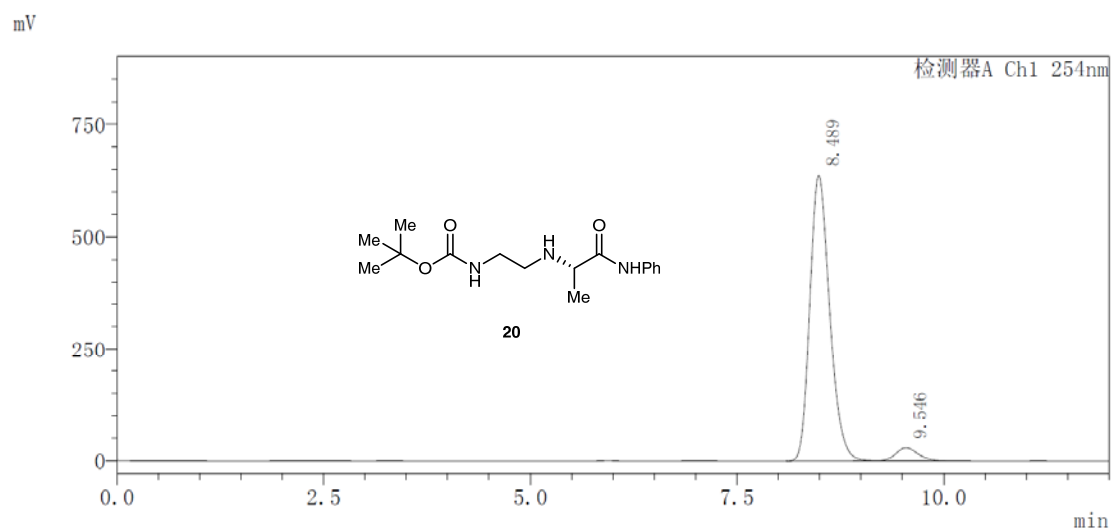

Peak Table

检测器A Ch1 254nm

| Peak# | Ret. Time | Area     | Area%  |
|-------|-----------|----------|--------|
| 1     | 8.489     | 10625249 | 95.141 |
| 2     | 9.546     | 542658   | 4.859  |

mAU

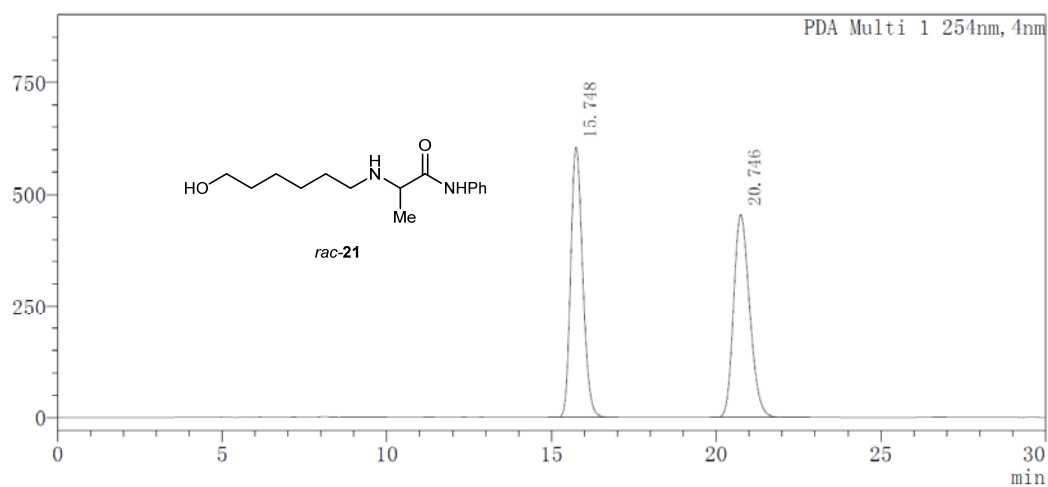

Peak Table

PDA Ch1 254nm

| Peak# | Ret. Time | Area     | Area%  |
|-------|-----------|----------|--------|
| 1     | 15.748    | 15275619 | 49.706 |
| 2     | 20.746    | 15456091 | 50.294 |

mAU

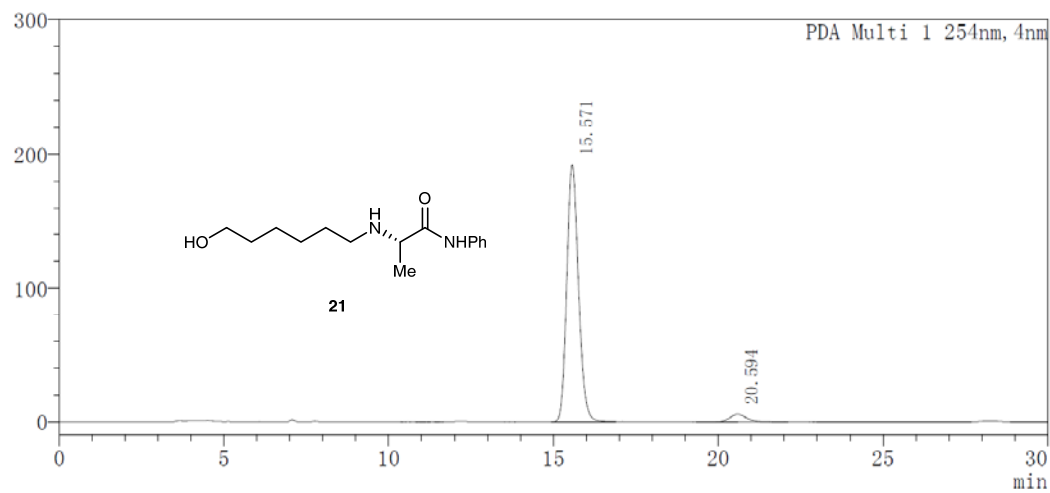

Peak Table

PDA Ch1 254nm

| Peak# | Ret. Time | Area    | Area%  |
|-------|-----------|---------|--------|
| 1     | 15.571    | 4748341 | 96.006 |
| 2     | 20.594    | 197529  | 3.994  |

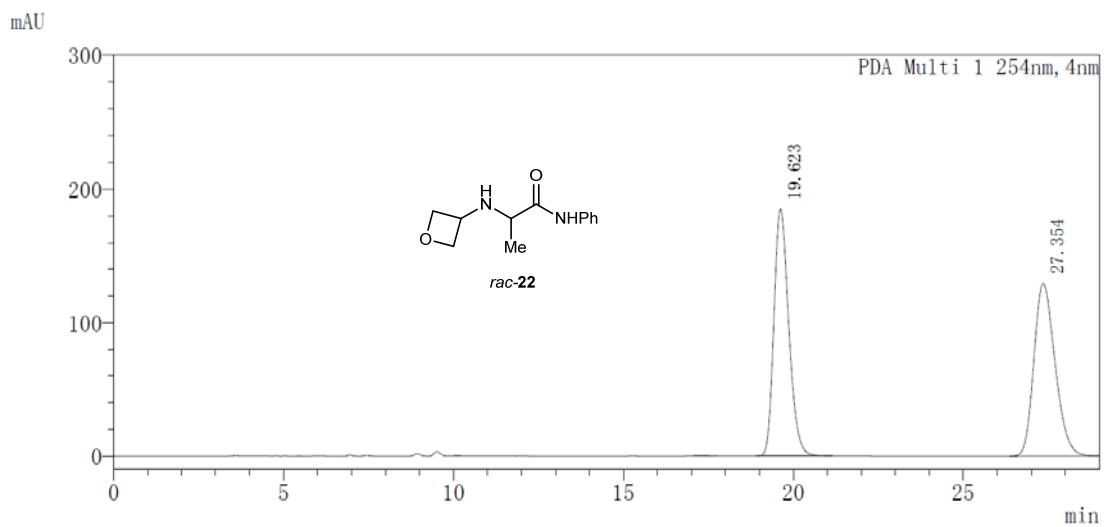

Peak Table

PDA Ch1 254nm

| Peak# | Ret. Time | Area    | Area%  |
|-------|-----------|---------|--------|
| 1     | 19.623    | 5525658 | 49.992 |
| 2     | 27.354    | 5527425 | 50.008 |

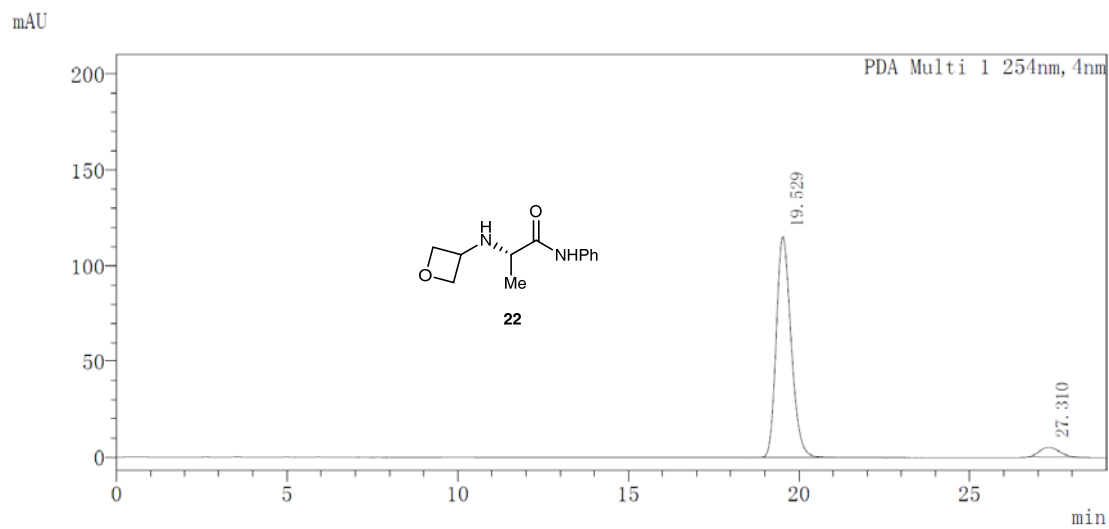

Peak Table

PDA Ch1 254nm

| Peak# | Ret. Time | Area    | Area%  |
|-------|-----------|---------|--------|
| 1     | 19.529    | 3505078 | 94.407 |
| 2     | 27.310    | 207666  | 5.593  |

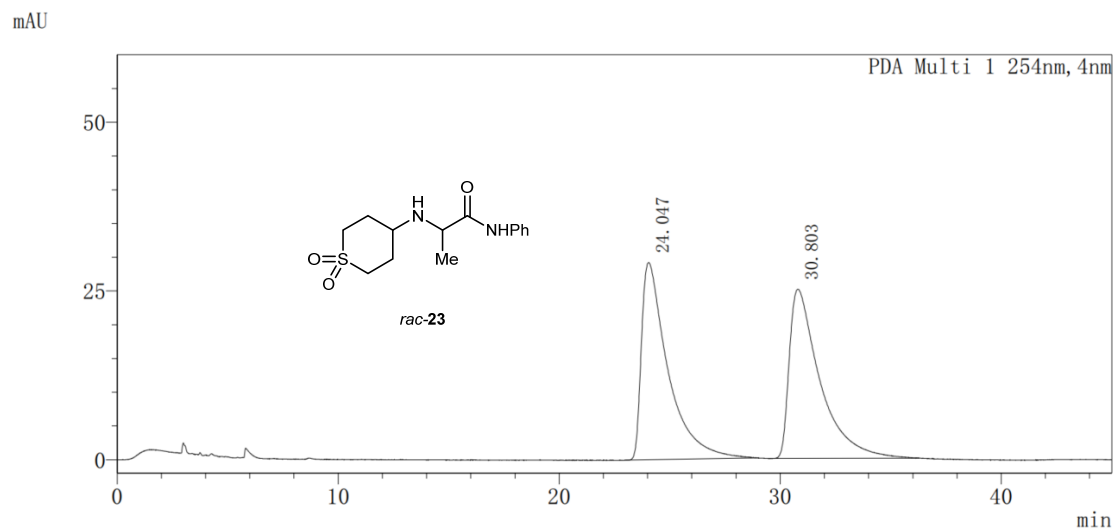

Peak Table

PDA Ch1 254nm

| Peak# | Ret. Time | Area    | Area%  |
|-------|-----------|---------|--------|
| 1     | 24.047    | 2439138 | 50.225 |
| 2     | 30.803    | 2417281 | 49.775 |

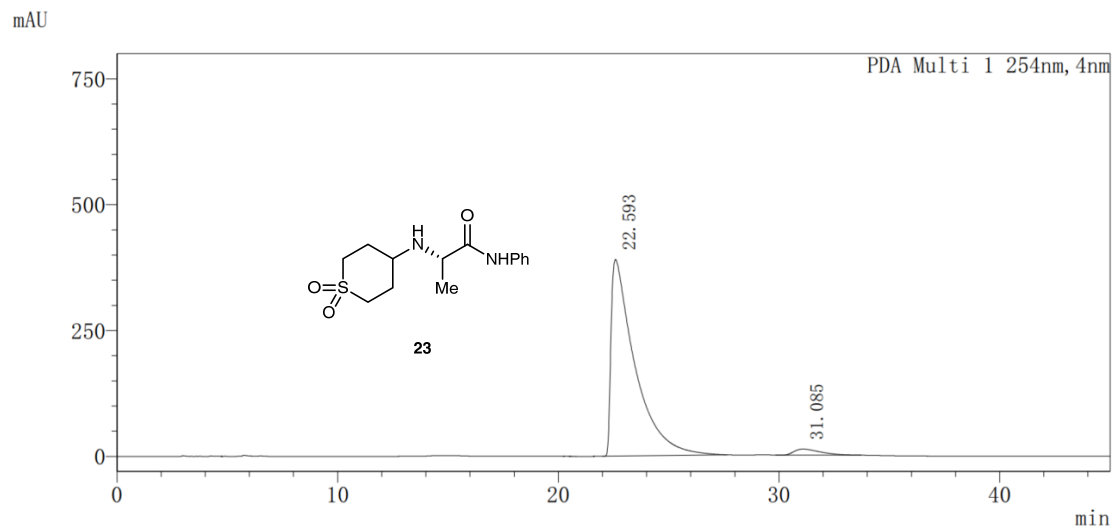

Peak Table

PDA Ch1 254nm

| Peak# | Ret. Time | Area     | Area%  |
|-------|-----------|----------|--------|
| 1     | 22.593    | 29423152 | 96.711 |
| 2     | 31.085    | 1000744  | 3.289  |



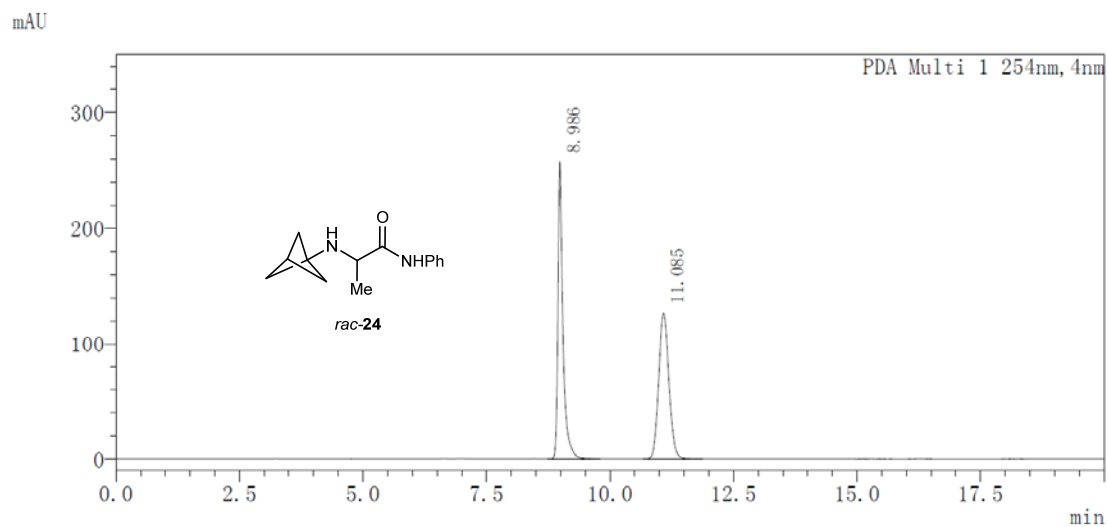

Peak Table

PDA Ch1 254nm

| Peak# | Ret. Time | Area    | Area%  |
|-------|-----------|---------|--------|
| 1     | 8.986     | 1825473 | 50.057 |
| 2     | 11.085    | 1821312 | 49.943 |

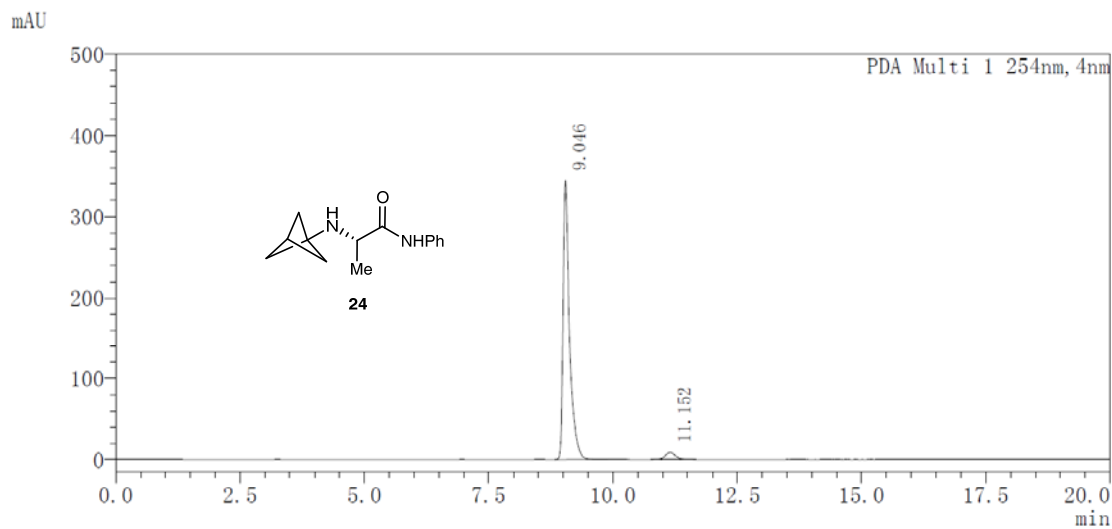

Peak Table

PDA Ch1 254nm

| Peak# | Ret. Time | Area    | Area%  |
|-------|-----------|---------|--------|
| 1     | 9.046     | 3068449 | 95.882 |
| 2     | 11.152    | 131780  | 4.118  |

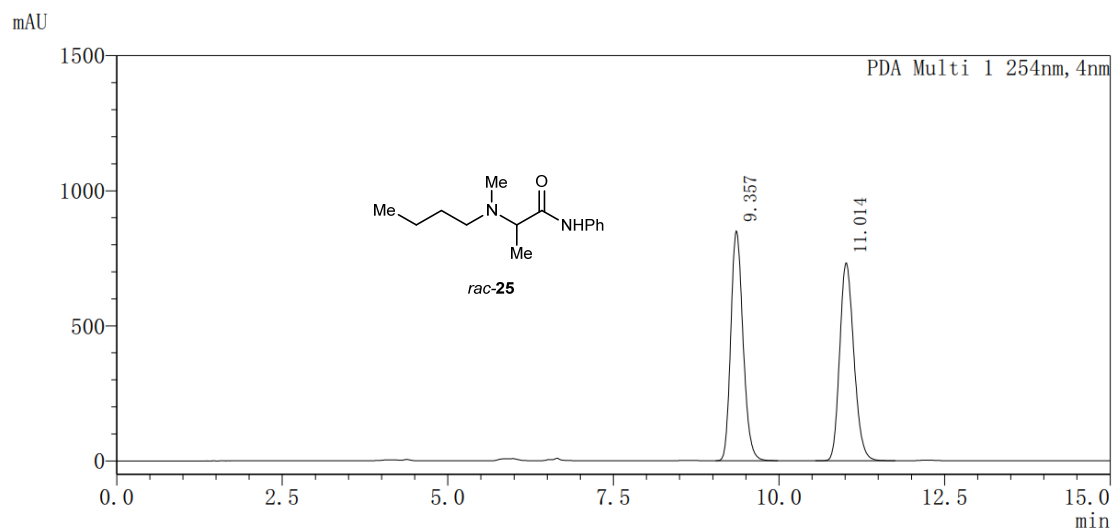

Peak Table

PDA Ch1 254nm

| Peak# | Ret. Time | Area     | Area%  |
|-------|-----------|----------|--------|
| 1     | 9.357     | 10942731 | 50.006 |
| 2     | 11.014    | 10940249 | 49.994 |

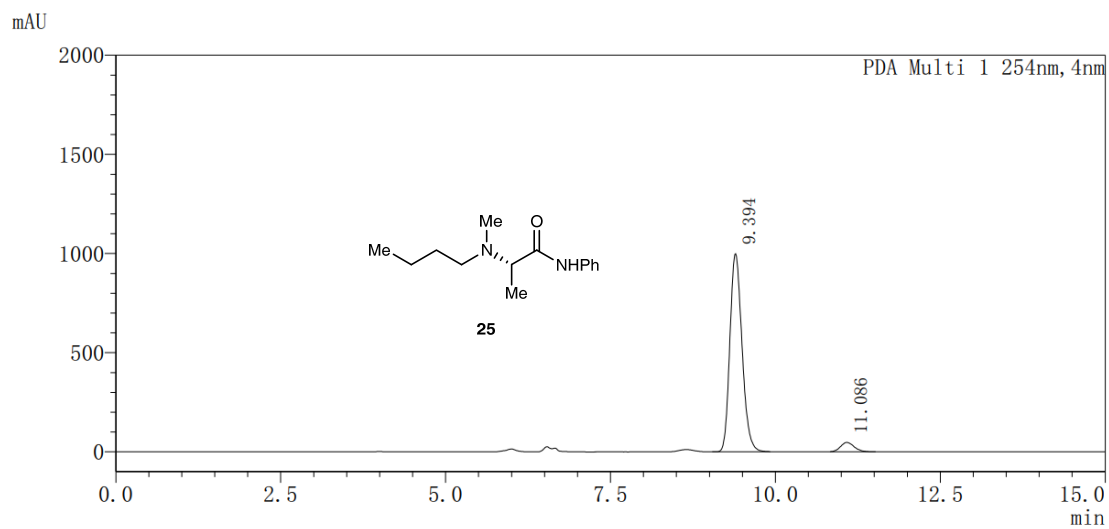

Peak Table

PDA Ch1 254nm

| Peak# | Ret. Time | Area     | Area%  |
|-------|-----------|----------|--------|
| 1     | 9.394     | 12788006 | 94.988 |
| 2     | 11.086    | 674738   | 5.012  |

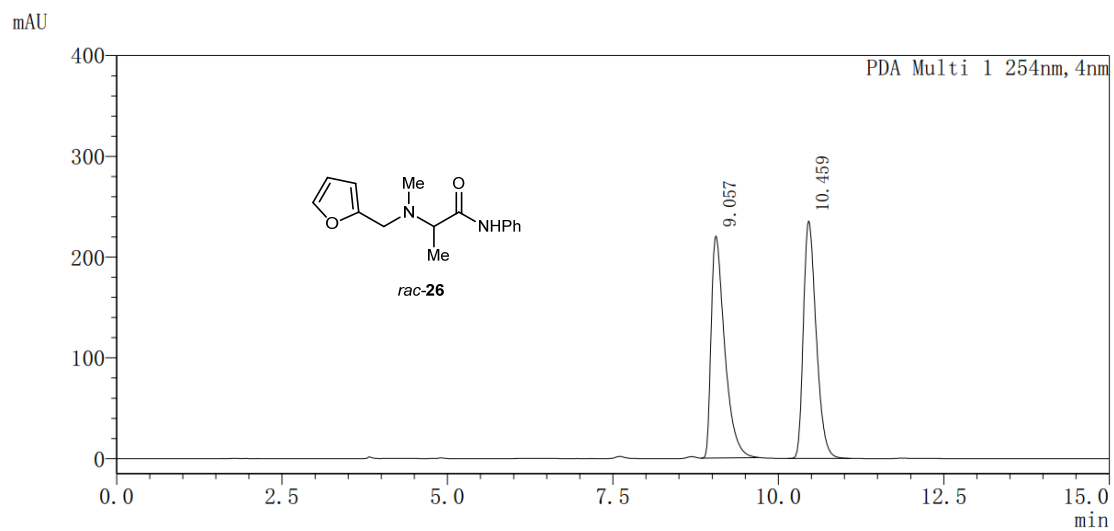

Peak Table

PDA Ch1 254nm

| Peak# | Ret. Time | Area    | Area%  |
|-------|-----------|---------|--------|
| 1     | 9.057     | 3133727 | 49.695 |
| 2     | 10.459    | 3172195 | 50.305 |

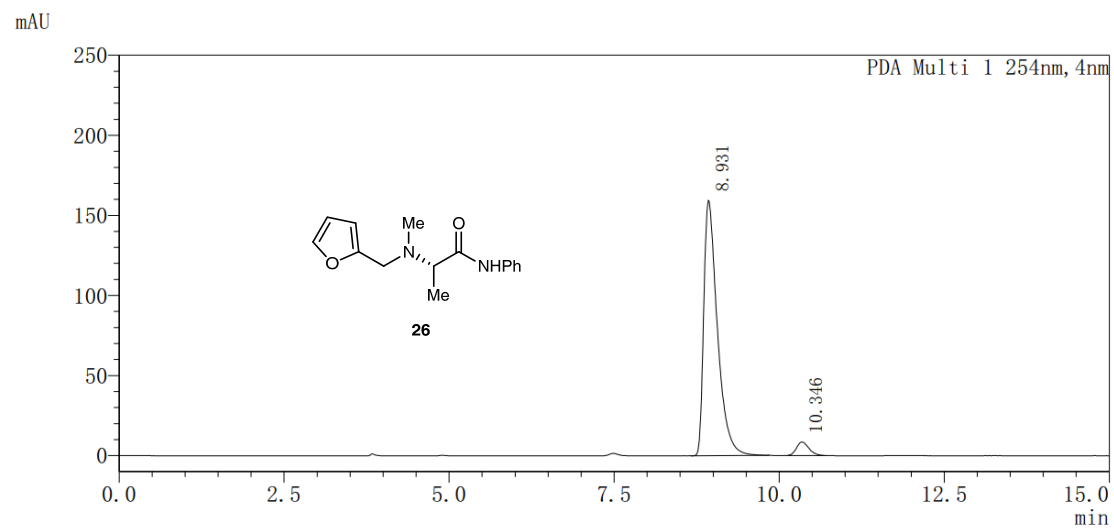

Peak Table

PDA Ch1 254nm

| Peak# | Ret. Time | Area    | Area%  |
|-------|-----------|---------|--------|
| 1     | 8.931     | 2291123 | 95.413 |
| 2     | 10.346    | 110137  | 4.587  |

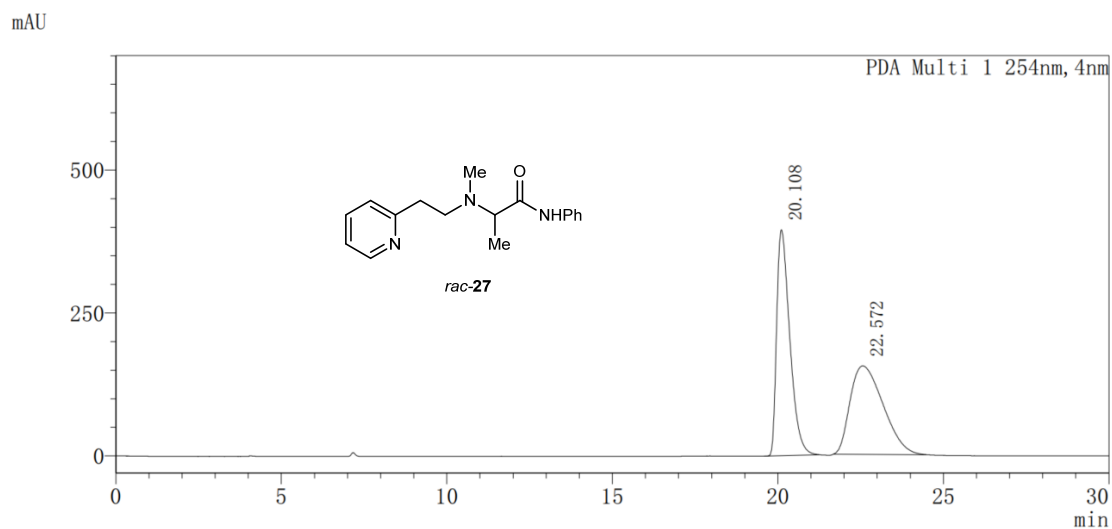

Peak Table

PDA Ch1 254nm

| Peak# | Ret. Time | Area     | Area%  |
|-------|-----------|----------|--------|
| 1     | 20.108    | 10919806 | 50.358 |
| 2     | 22.572    | 10764485 | 49.642 |

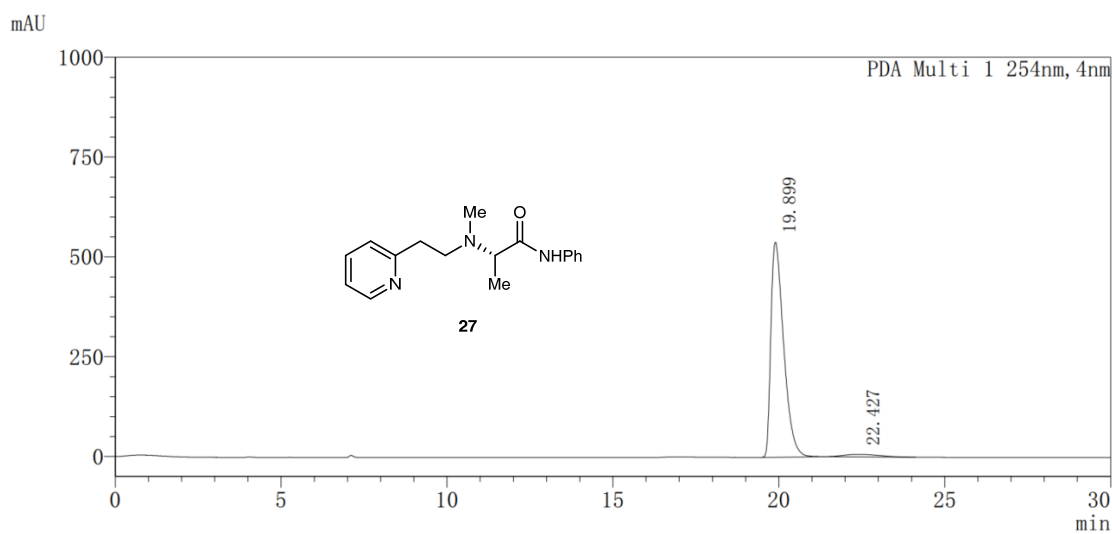

Peak Table

PDA Ch1 254nm

| Peak# | Ret. Time | Area     | Area%  |
|-------|-----------|----------|--------|
| 1     | 19.899    | 14507061 | 96.840 |
| 2     | 22.427    | 473354   | 3.160  |

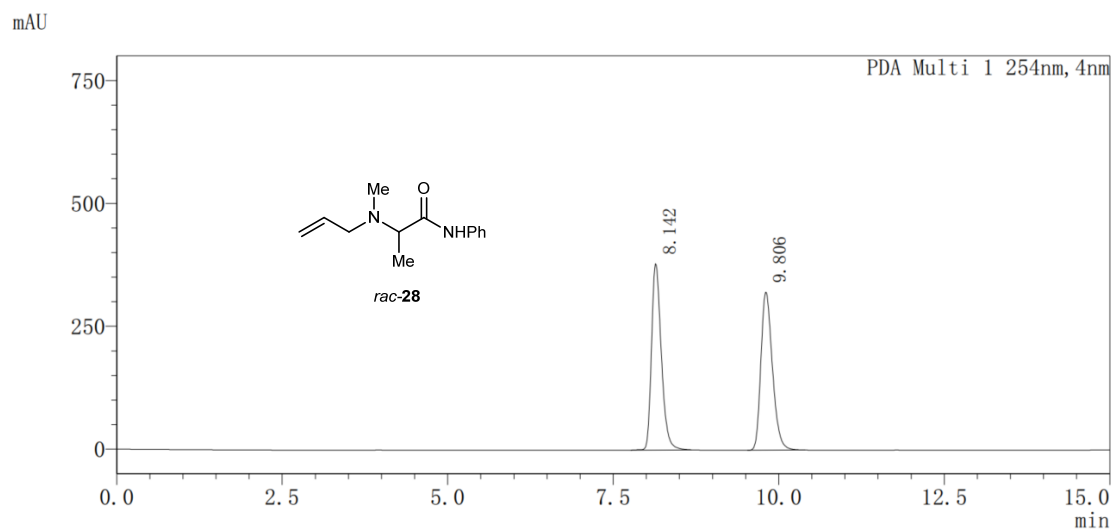

Peak Table

PDA Ch1 254nm

| Peak# | Ret. Time | Area    | Area%  |
|-------|-----------|---------|--------|
| 1     | 8.142     | 3911052 | 50.058 |
| 2     | 9.806     | 3901955 | 49.942 |

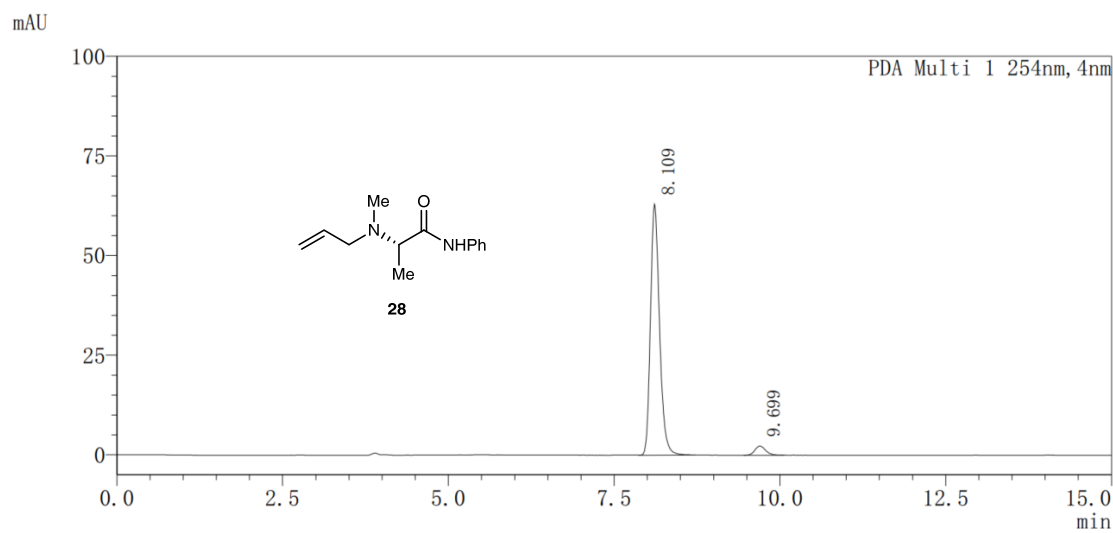

Peak Table

PDA Ch1 254nm

| Peak# | Ret. Time | Area   | Area%  |
|-------|-----------|--------|--------|
| 1     | 8.109     | 598551 | 95.809 |
| 2     | 9.699     | 26184  | 4.191  |

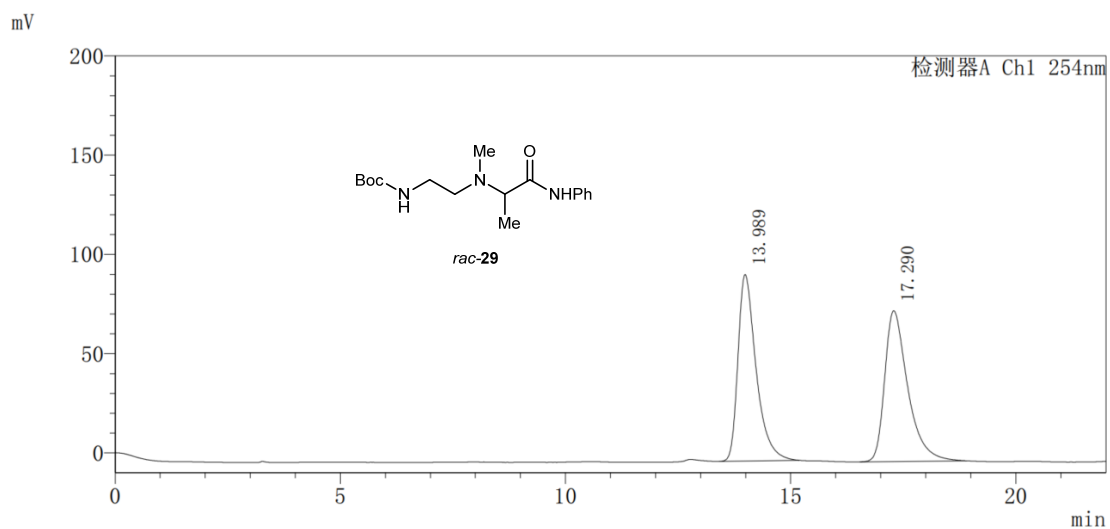

Peak Table

检测器A Ch1 254nm

| Peak# | Ret. Time | Area    | Area%  |
|-------|-----------|---------|--------|
| 1     | 13.989    | 2636188 | 49.348 |
| 2     | 17.290    | 2705805 | 50.652 |

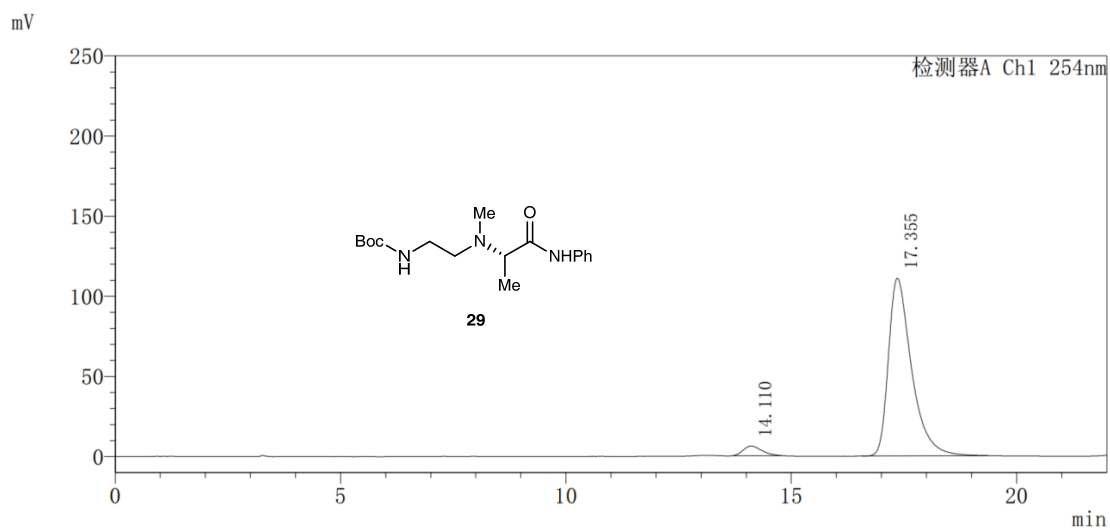

Peak Table

检测器A Ch1 254nm

| Peak# | Ret. Time | Area    | Area%  |
|-------|-----------|---------|--------|
| 1     | 14.110    | 168875  | 4.084  |
| 2     | 17.355    | 3965926 | 95.916 |

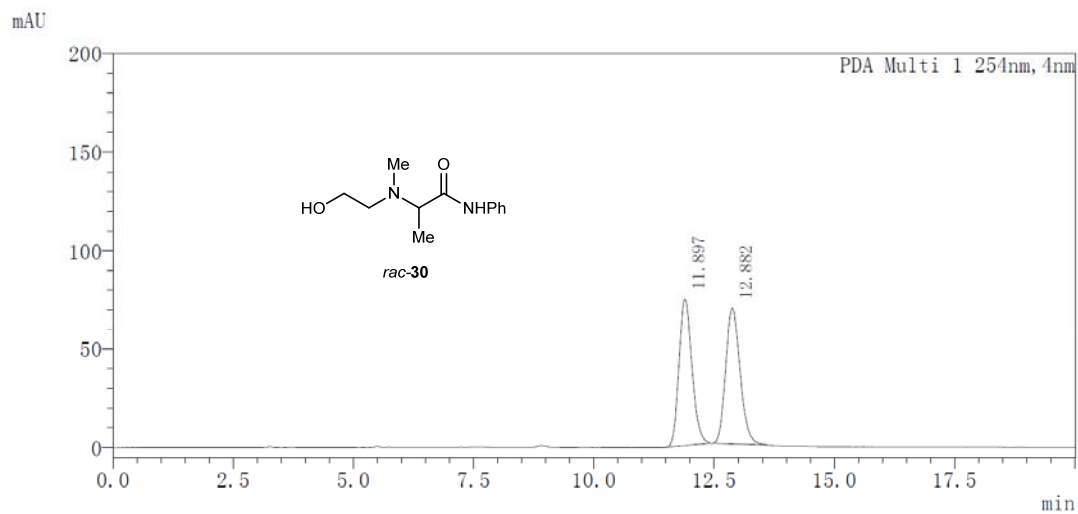

Peak Table

PDA Ch1 254nm

| Peak# | Ret. Time | Area    | Area%  |
|-------|-----------|---------|--------|
| 1     | 11.897    | 1394559 | 49.217 |
| 2     | 12.882    | 1438955 | 50.783 |

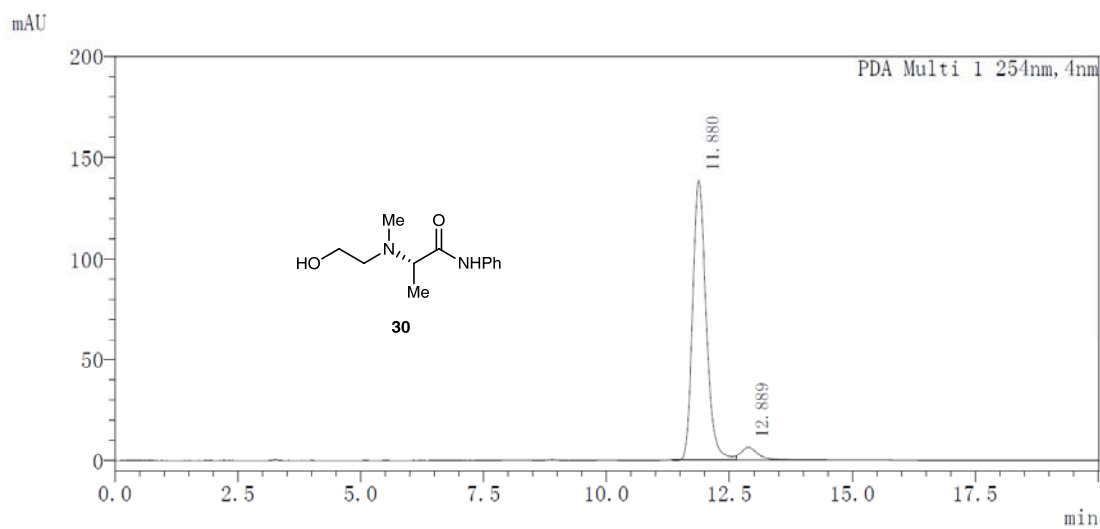

Peak Table

PDA Ch1 254nm

| Peak# | Ret. Time | Area    | Area%  |
|-------|-----------|---------|--------|
| 1     | 11.880    | 2644196 | 94.810 |
| 2     | 12.889    | 144742  | 5.190  |

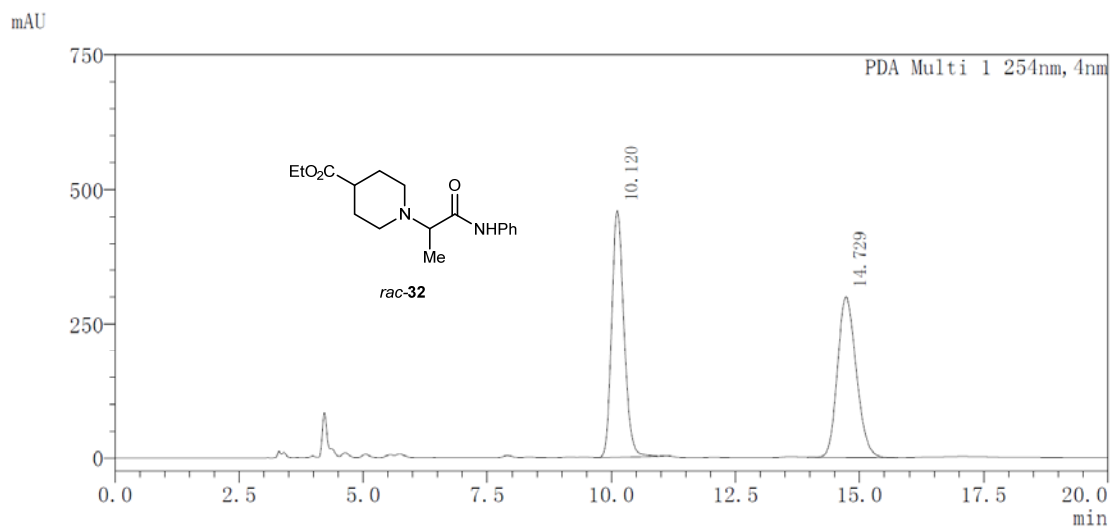

Peak Table

PDA Ch1 254nm

| Peak# | Ret. Time | Area    | Area%  |
|-------|-----------|---------|--------|
| 1     | 10.120    | 7895702 | 50.021 |
| 2     | 14.729    | 7889048 | 49.979 |

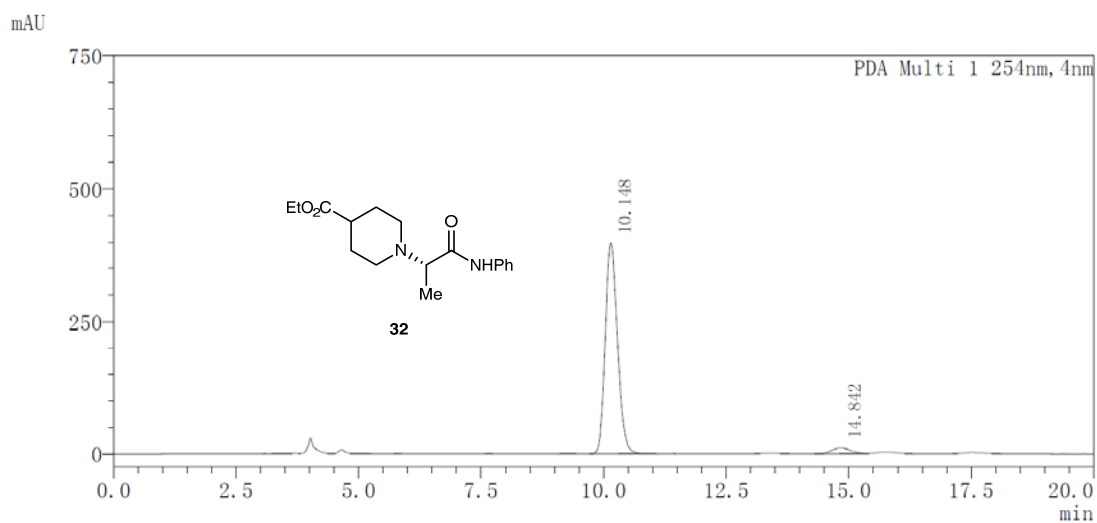

Peak Table

PDA Ch1 254nm

| Peak# | Ret. Time | Area    | Area%  |
|-------|-----------|---------|--------|
| 1     | 10.148    | 6919915 | 96.095 |
| 2     | 14.842    | 281172  | 3.905  |



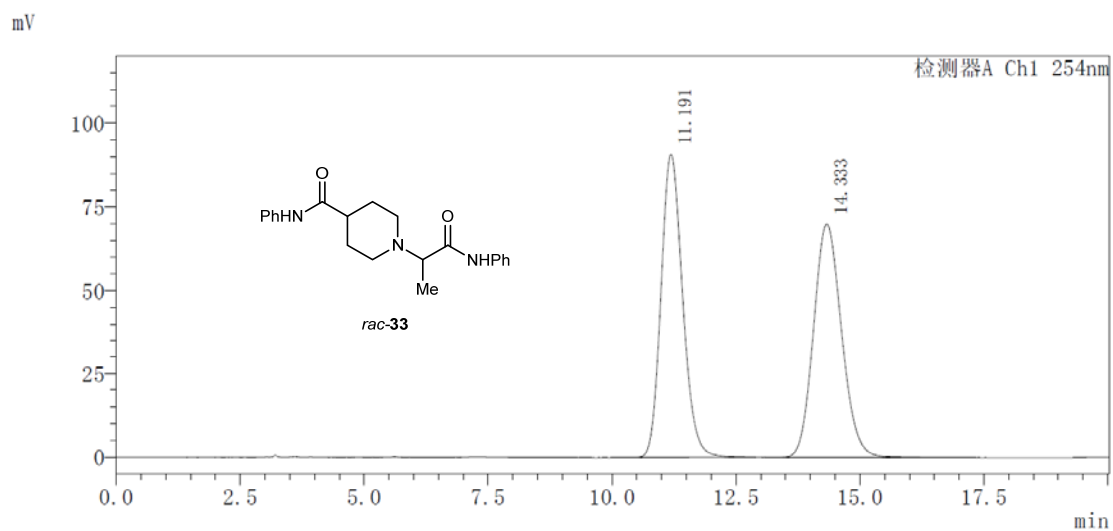

Peak Table

检测器A Ch1 254nm

| Peak# | Ret. Time | Area    | Area%  |
|-------|-----------|---------|--------|
| 1     | 11.191    | 2754189 | 50.042 |
| 2     | 14.333    | 2749600 | 49.958 |

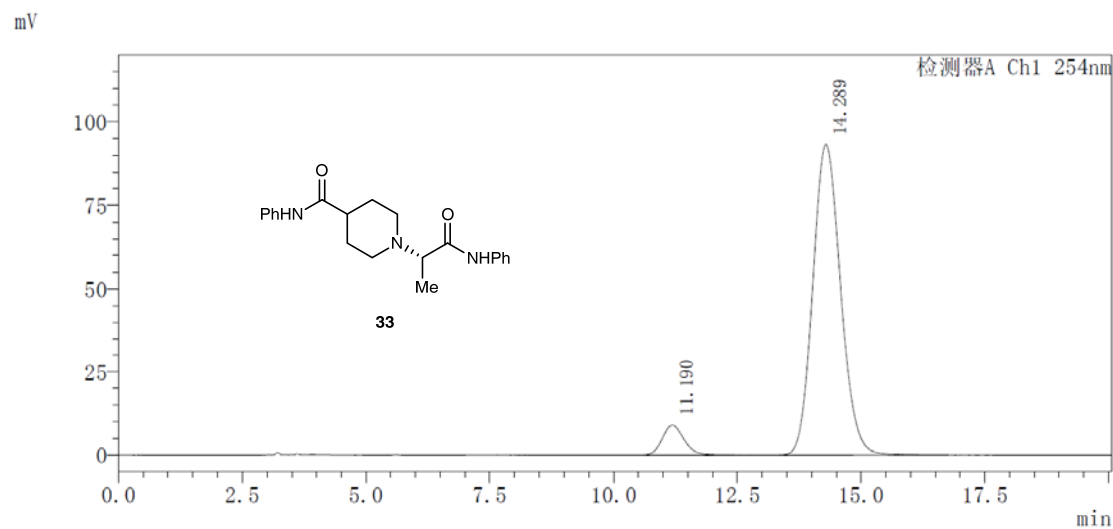

Peak Table

检测器A Ch1 254nm

| Peak# | Ret. Time | Area    | Area%  |
|-------|-----------|---------|--------|
| 1     | 11.190    | 278910  | 7.090  |
| 2     | 14.289    | 3654992 | 92.910 |

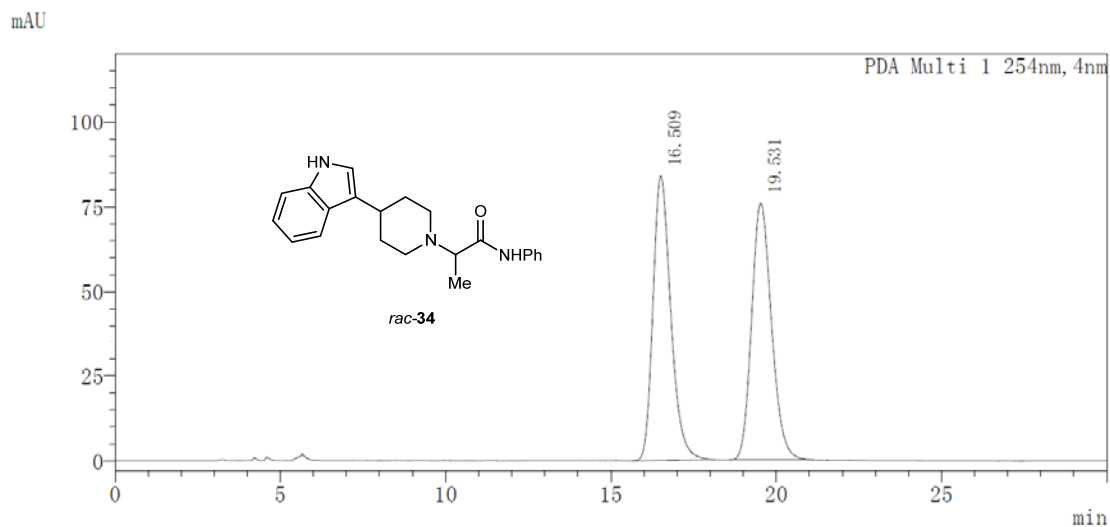

Peak Table

PDA Ch1 254nm

| Peak# | Ret. Time | Area    | Area%  |
|-------|-----------|---------|--------|
| 1     | 16.509    | 3155991 | 49.859 |
| 2     | 19.531    | 3173885 | 50.141 |

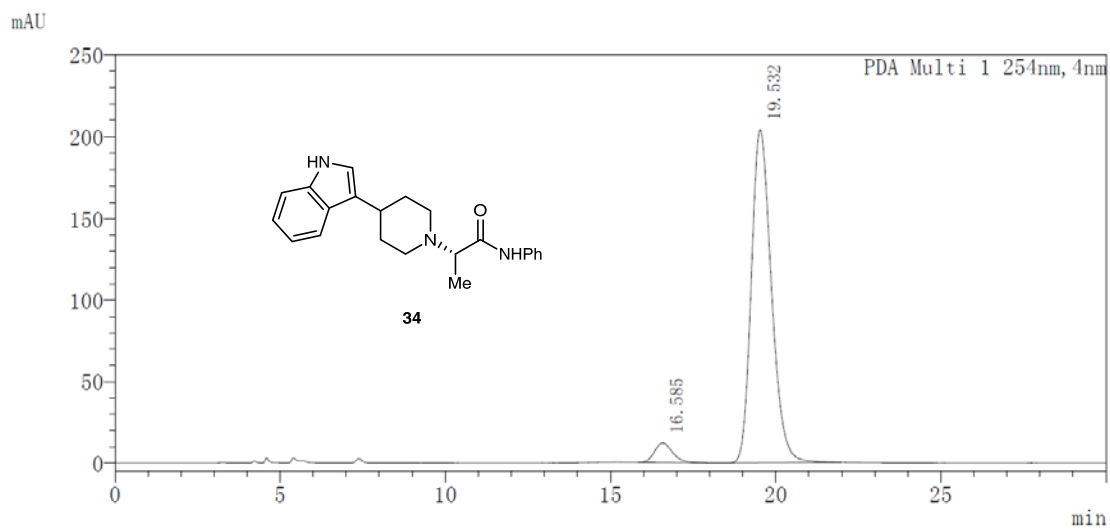

Peak Table

PDA Ch1 254nm

| Peak# | Ret. Time | Area    | Area%  |
|-------|-----------|---------|--------|
| 1     | 16.585    | 455980  | 5.013  |
| 2     | 19.532    | 8639416 | 94.987 |

mAU

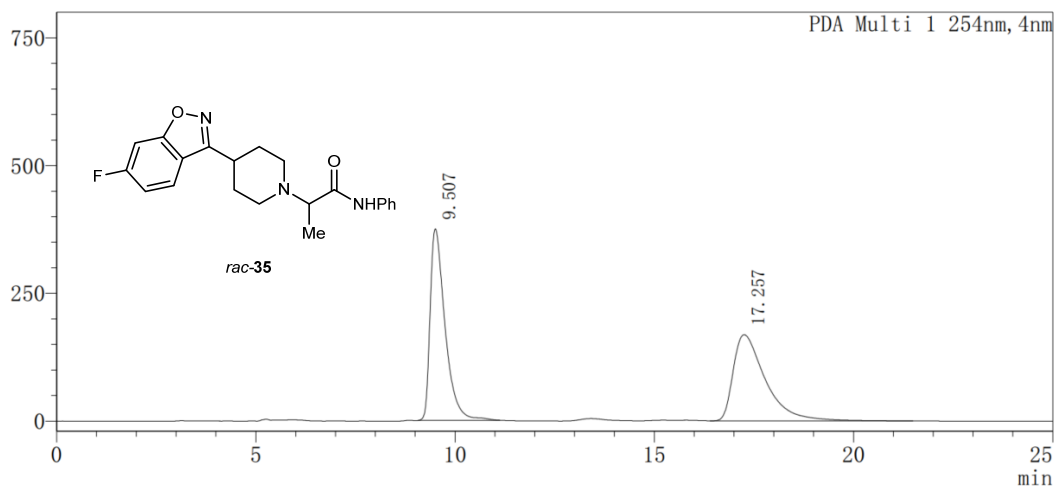

Peak Table

PDA Ch1 254nm

| Peak# | Ret. Time | Area    | Area%  |
|-------|-----------|---------|--------|
| 1     | 9.507     | 9783838 | 50.762 |
| 2     | 17.257    | 9490246 | 49.238 |

mAU

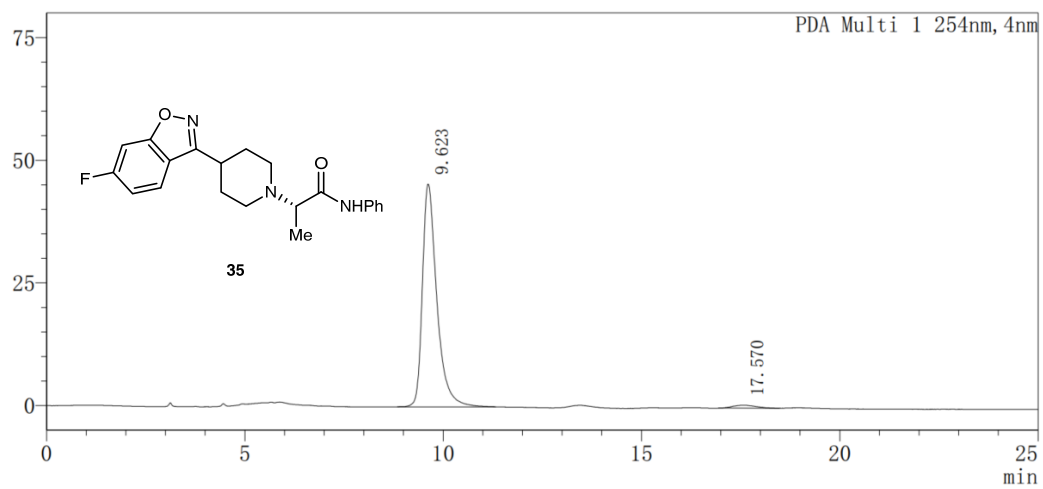

Peak Table

PDA Ch1 254nm

| Peak# | Ret. Time | Area    | Area%  |
|-------|-----------|---------|--------|
| 1     | 9.623     | 1149347 | 97.918 |
| 2     | 17.570    | 24435   | 2.082  |

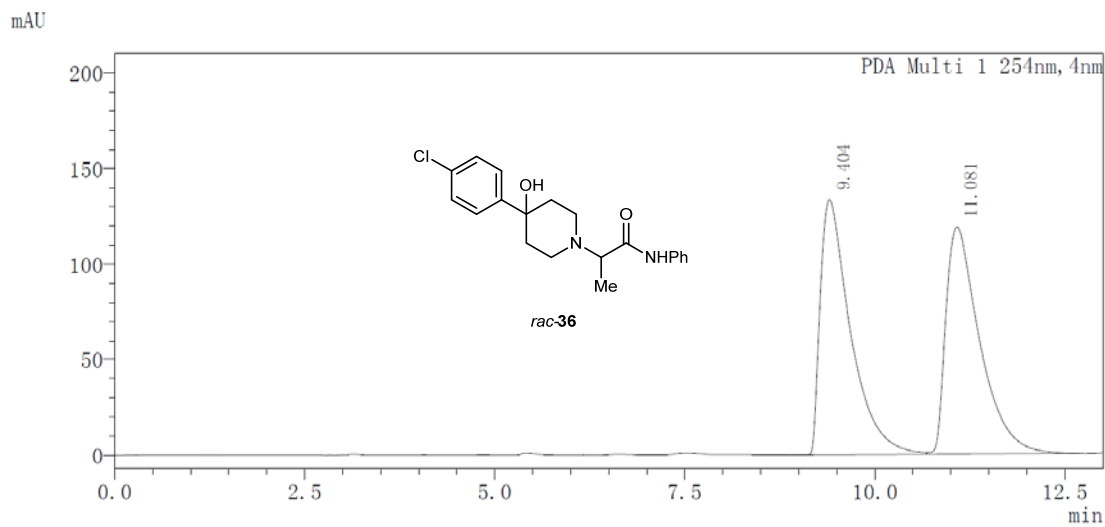

Peak Table

PDA Ch1 254nm

| Peak# | Ret. Time | Area    | Area%  |
|-------|-----------|---------|--------|
| 1     | 9.404     | 3702171 | 50.047 |
| 2     | 11.081    | 3695153 | 49.953 |

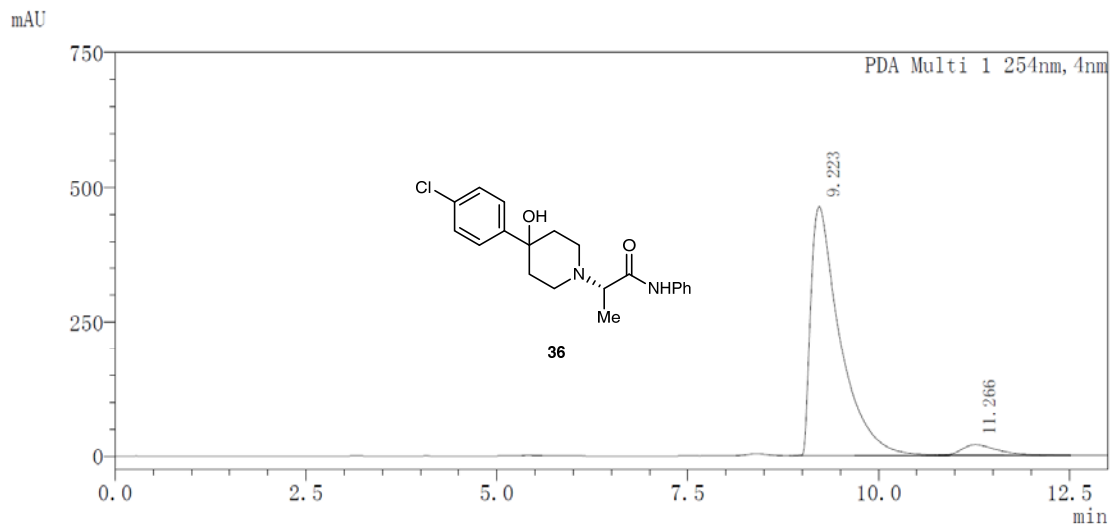

Peak Table

PDA Ch1 254nm

| Peak# | Ret. Time | Area     | Area%  |
|-------|-----------|----------|--------|
| 1     | 9.223     | 12474593 | 95.349 |
| 2     | 11.266    | 608521   | 4.651  |

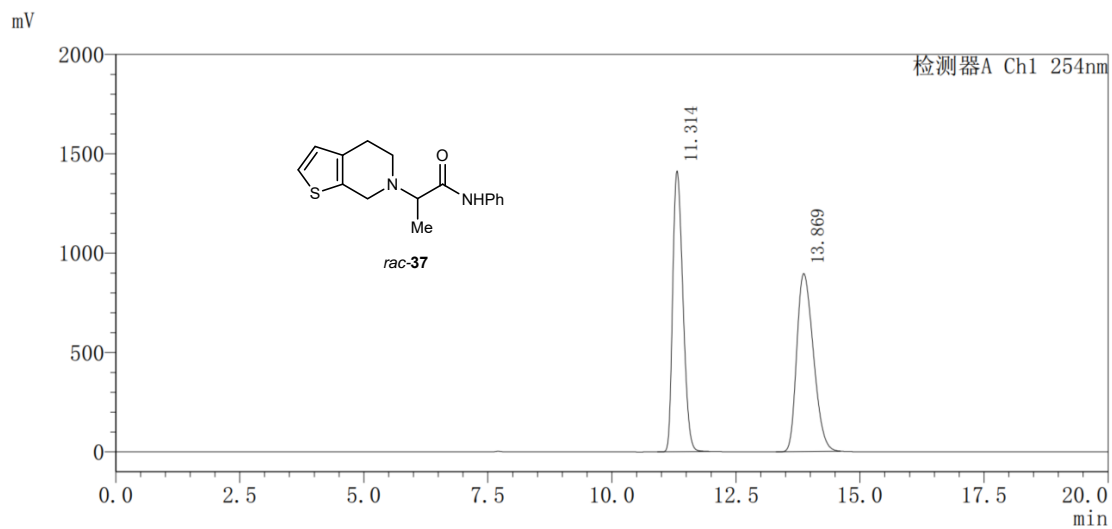

Peak Table

检测器A Ch1 254nm

| Peak# | Ret. Time | Area     | Area%  |
|-------|-----------|----------|--------|
| 1     | 11.314    | 20244210 | 49.266 |
| 2     | 13.869    | 20847541 | 50.734 |

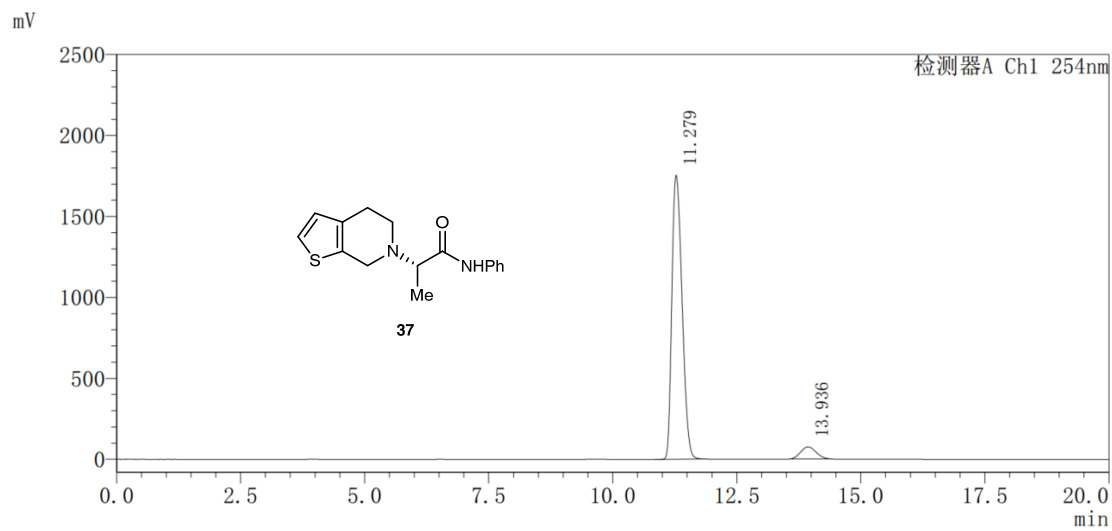

Peak Table

检测器A Ch1 254nm

| Peak# | Ret. Time | Area     | Area%  |
|-------|-----------|----------|--------|
| 1     | 11.279    | 25123770 | 93.994 |
| 2     | 13.936    | 1605220  | 6.006  |

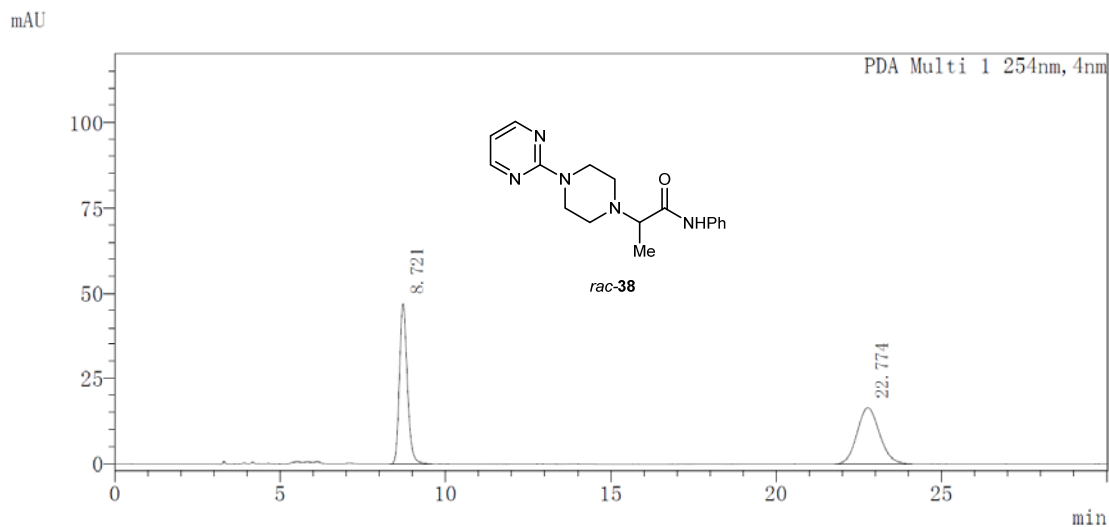

Peak Table

PDA Ch1 254nm

| Peak# | Ret. Time | Area   | Area%  |
|-------|-----------|--------|--------|
| 1     | 8.721     | 776544 | 50.385 |
| 2     | 22.774    | 764671 | 49.615 |

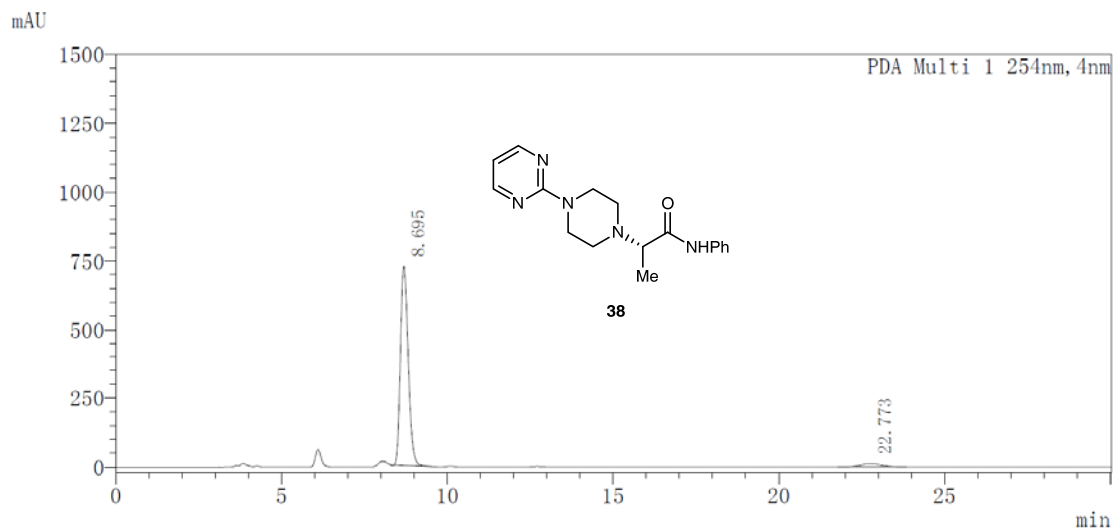

Peak Table

PDA Ch1 254nm

| Peak# | Ret. Time | Area     | Area%  |
|-------|-----------|----------|--------|
| 1     | 8.695     | 11824624 | 95.686 |
| 2     | 22.773    | 533050   | 4.314  |

mV

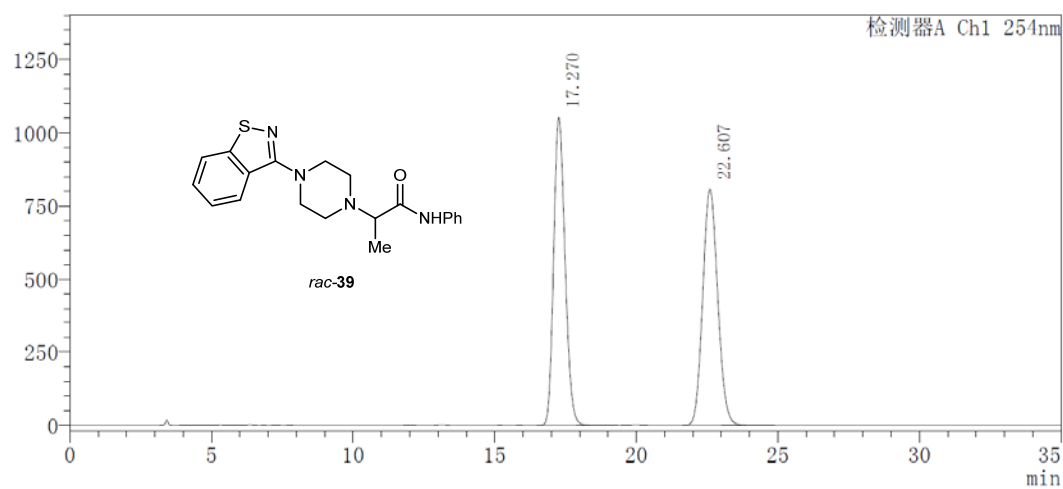

Peak Table

检测器A Ch1 254nm

| Peak# | Ret. Time | Area     | Area%  |
|-------|-----------|----------|--------|
| 1     | 17.270    | 29467683 | 49.811 |
| 2     | 22.607    | 29691744 | 50.189 |

mV

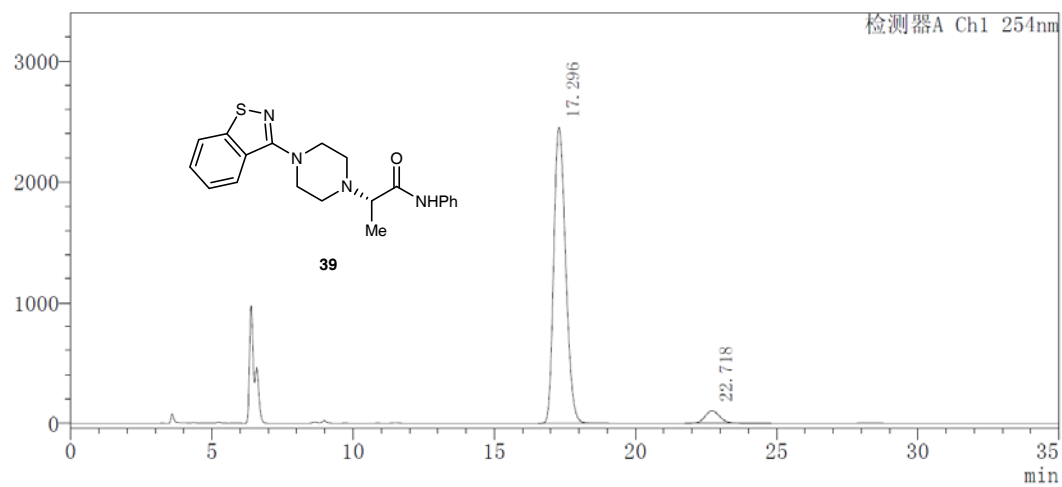

Peak Table

检测器A Ch1 254nm

| Peak# | Ret. Time | Area     | Area%  |
|-------|-----------|----------|--------|
| 1     | 17.296    | 71741675 | 95.059 |
| 2     | 22.718    | 3729090  | 4.941  |

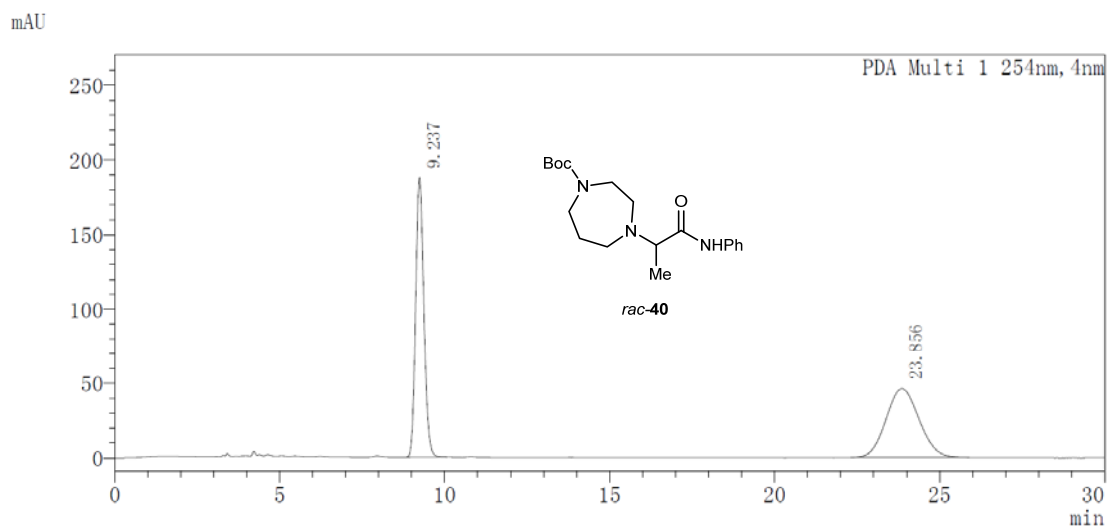

Peak Table

PDA Ch1 254nm

| Peak# | Ret. Time | Area    | Area%  |
|-------|-----------|---------|--------|
| 1     | 9.237     | 3257344 | 50.159 |
| 2     | 23.856    | 3236743 | 49.841 |

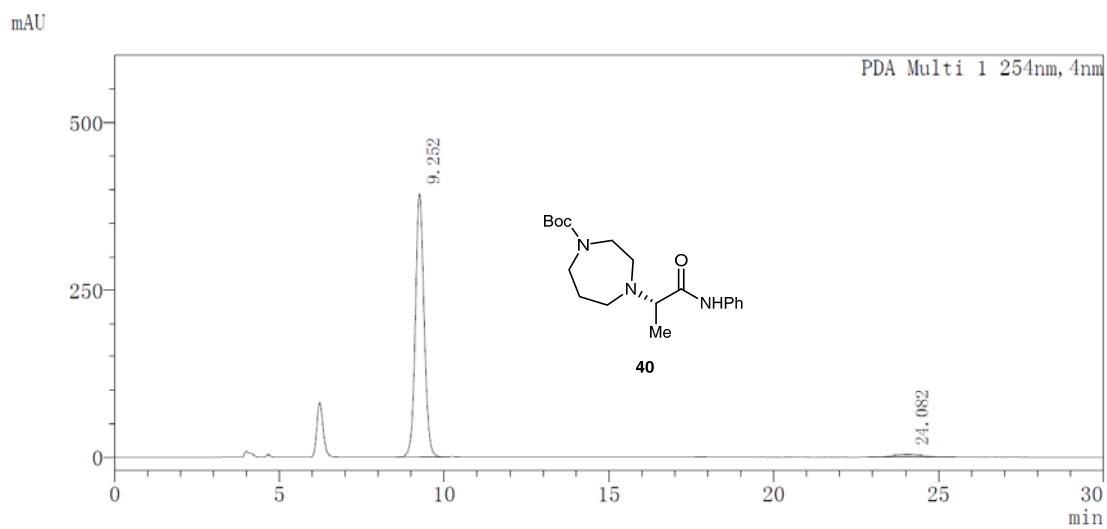

Peak Table

PDA Ch1 254nm

| Peak# | Ret. Time | Area    | Area%  |
|-------|-----------|---------|--------|
| 1     | 9.252     | 7249612 | 96.628 |
| 2     | 24.082    | 252979  | 3.372  |



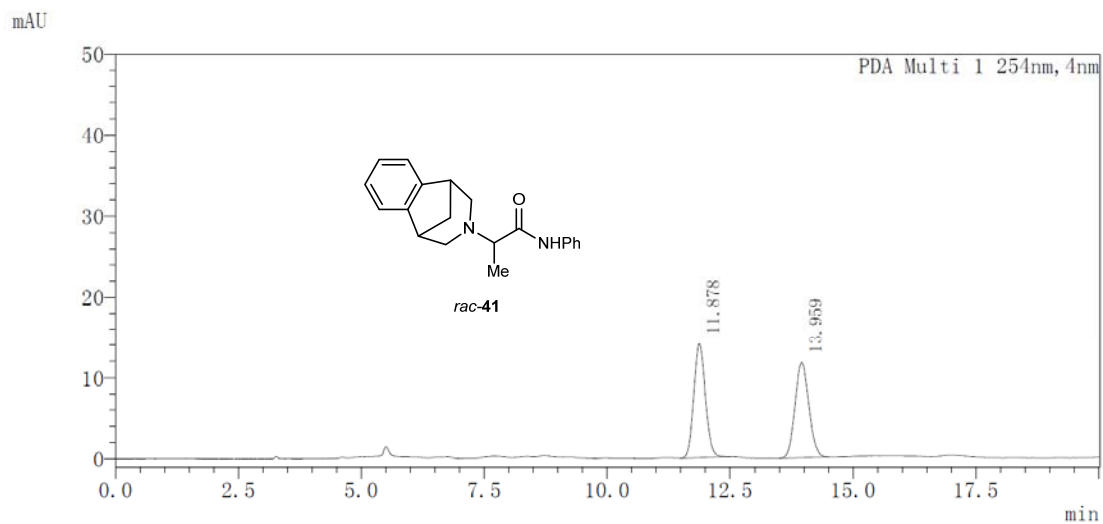

Peak Table

PDA Ch1 254nm

| Peak# | Ret. Time | Area   | Area%  |
|-------|-----------|--------|--------|
| 1     | 11.878    | 229662 | 50.082 |
| 2     | 13.959    | 228909 | 49.918 |

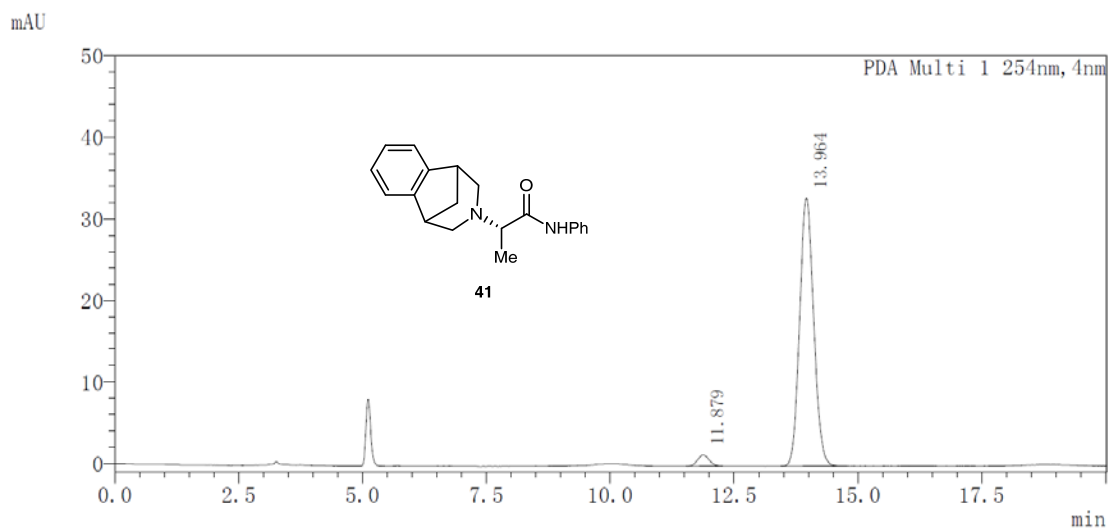

Peak Table

PDA Ch1 254nm

| Peak# | Ret. Time | Area   | Area%  |
|-------|-----------|--------|--------|
| 1     | 11.879    | 22347  | 3.333  |
| 2     | 13.964    | 648200 | 96.667 |

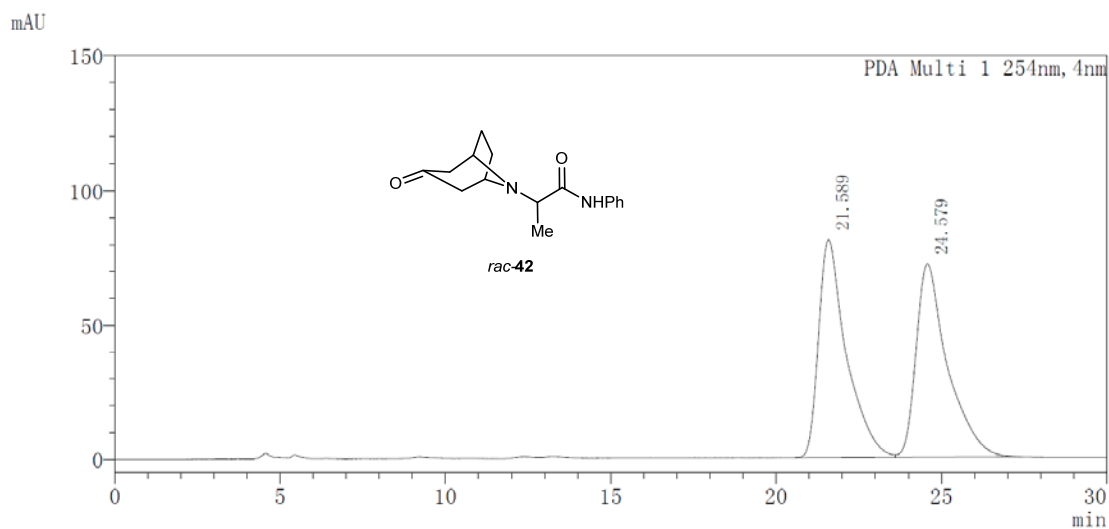

Peak Table

PDA Ch1 254nm

| Peak# | Ret. Time | Area    | Area%  |
|-------|-----------|---------|--------|
| 1     | 21.589    | 4744653 | 49.896 |
| 2     | 24.579    | 4764488 | 50.104 |

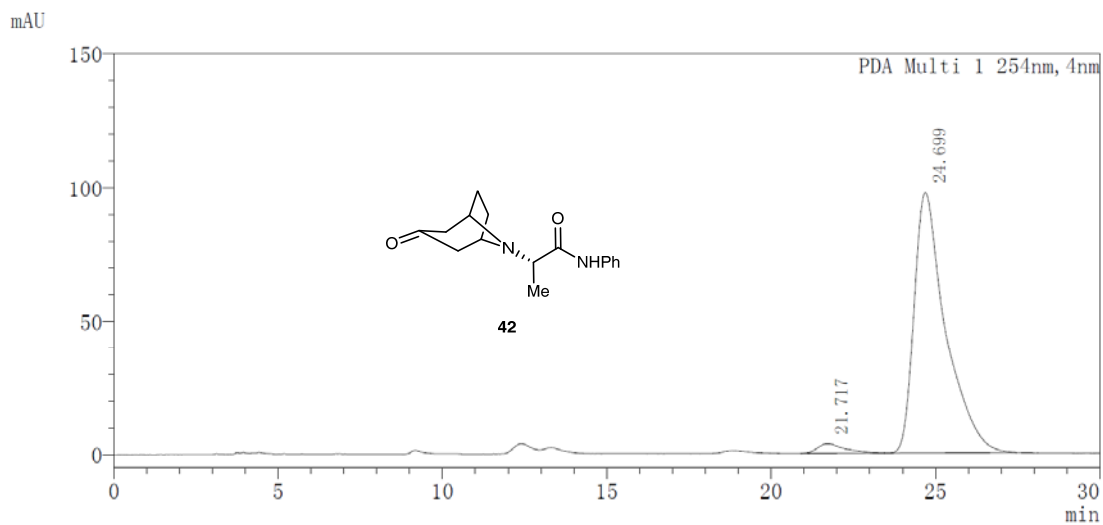

Peak Table

PDA Ch1 254nm

| Peak# | Ret. Time | Area    | Area%  |
|-------|-----------|---------|--------|
| 1     | 21.717    | 210607  | 3.139  |
| 2     | 24.699    | 6498877 | 96.861 |

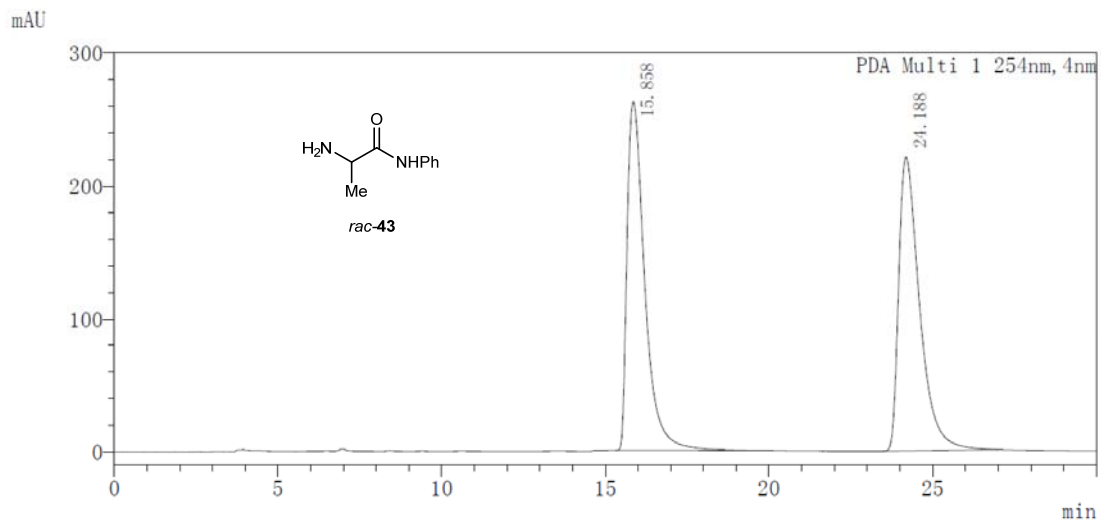

Peak Table

PDA Ch1 254nm

| Peak# | Ret. Time | Area    | Area%  |
|-------|-----------|---------|--------|
| 1     | 15.858    | 9847244 | 50.009 |
| 2     | 24.188    | 9843857 | 49.991 |

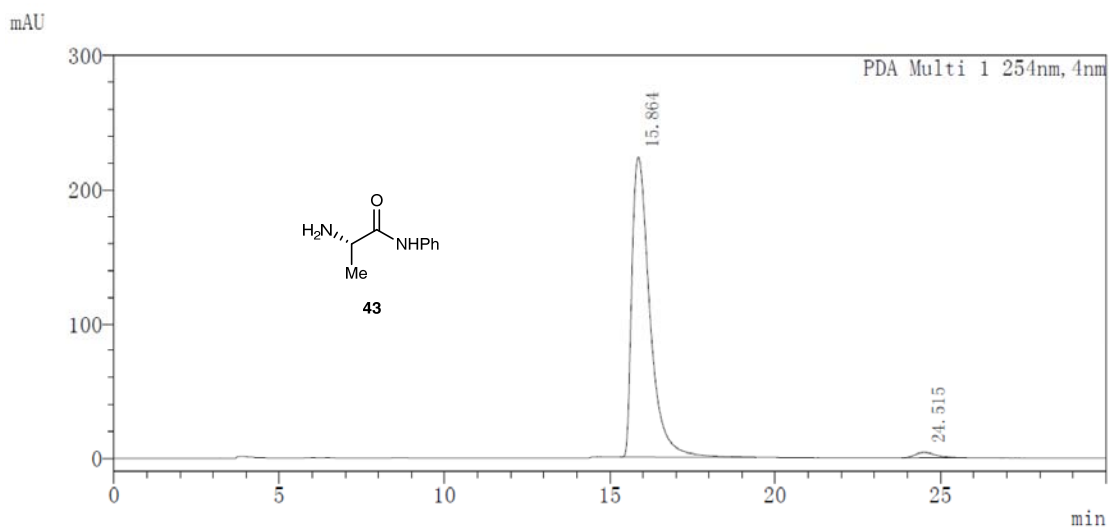

Peak Table

PDA Ch1 254nm

| Peak# | Ret. Time | Area    | Area%  |
|-------|-----------|---------|--------|
| 1     | 15.864    | 8471501 | 97.887 |
| 2     | 24.515    | 182831  | 2.113  |

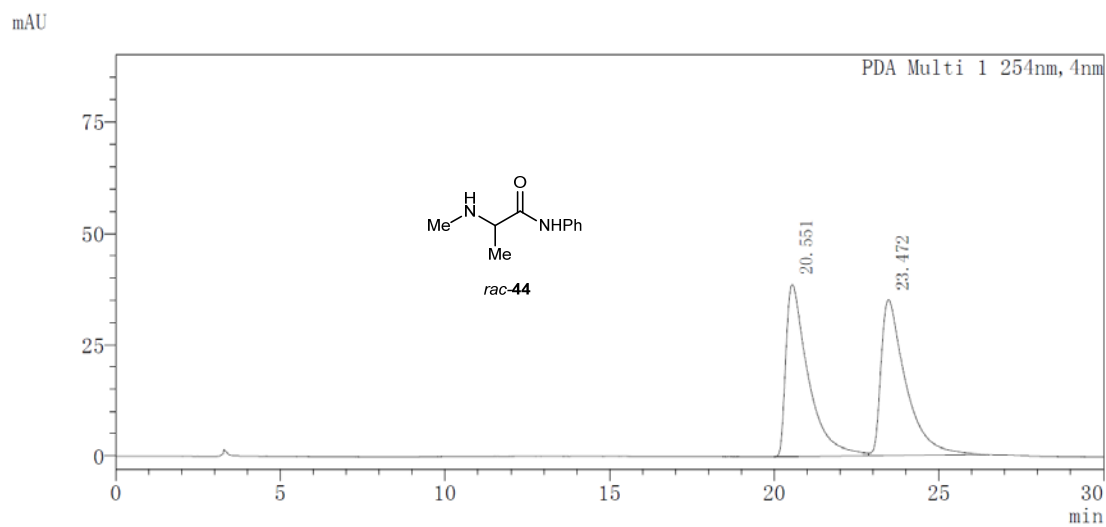

Peak Table

PDA Ch1 254nm

| Peak# | Ret. Time | Area    | Area%  |
|-------|-----------|---------|--------|
| 1     | 20.551    | 1824759 | 49.953 |
| 2     | 23.472    | 1828193 | 50.047 |

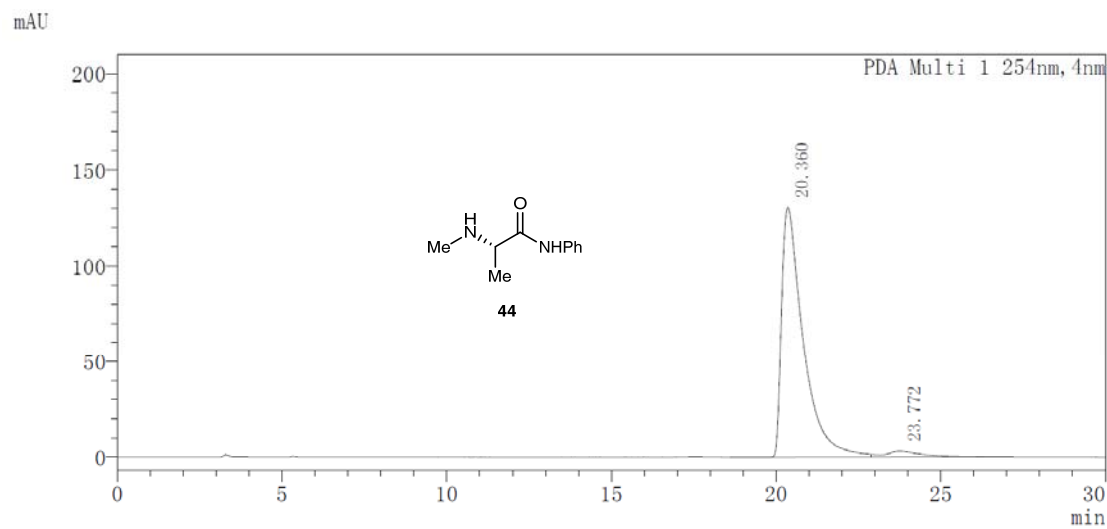

Peak Table

PDA Ch1 254nm

| Peak# | Ret. Time | Area    | Area%  |
|-------|-----------|---------|--------|
| 1     | 20.360    | 5989945 | 95.897 |
| 2     | 23.772    | 256282  | 4.103  |

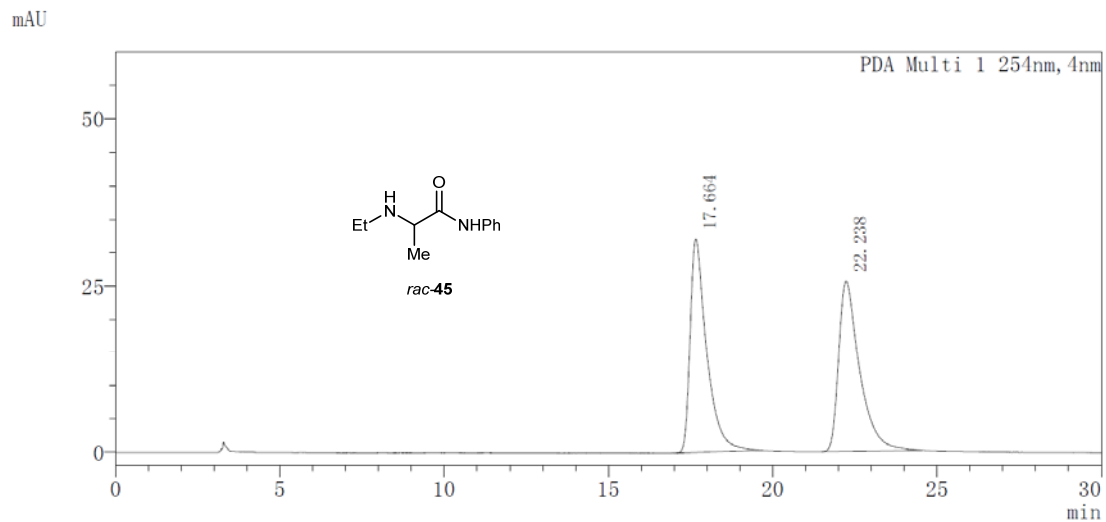

Peak Table

PDA Ch1 254nm

| Peak# | Ret. Time | Area    | Area%  |
|-------|-----------|---------|--------|
| 1     | 17.664    | 1123147 | 49.766 |
| 2     | 22.238    | 1133701 | 50.234 |

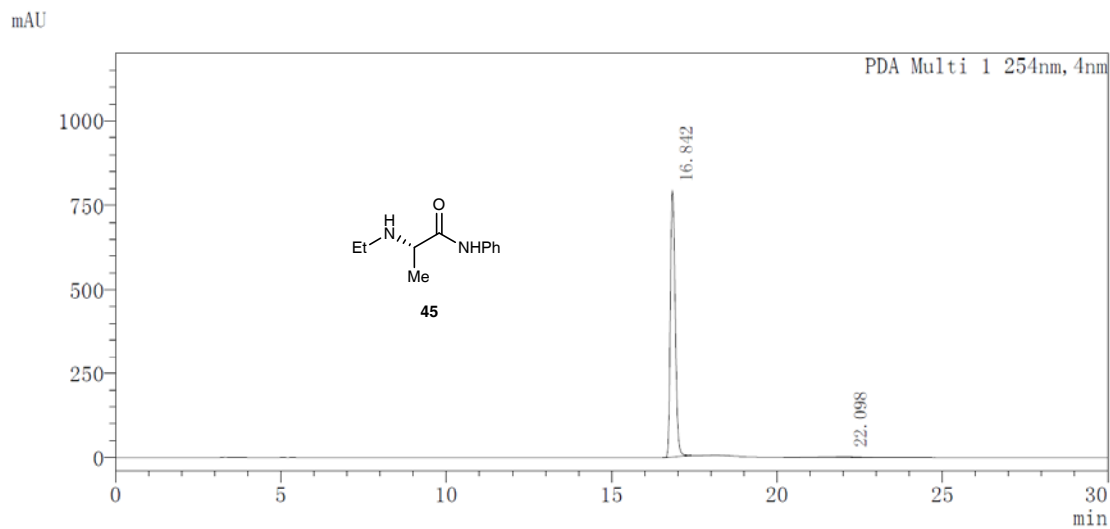

Peak Table

PDA Ch1 254nm

| Peak# | Ret. Time | Area    | Area%  |
|-------|-----------|---------|--------|
| 1     | 16.842    | 8107519 | 97.917 |
| 2     | 22.098    | 172481  | 2.083  |

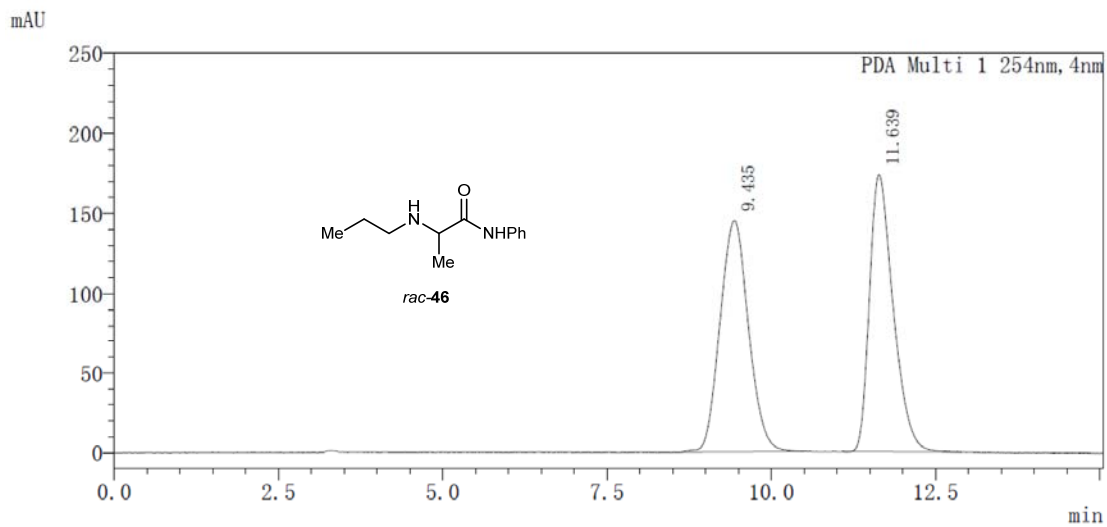

Peak Table

PDA Ch1 254nm

| Peak# | Ret. Time | Area    | Area%  |
|-------|-----------|---------|--------|
| 1     | 9.435     | 4380006 | 50.096 |
| 2     | 11.639    | 4363186 | 49.904 |

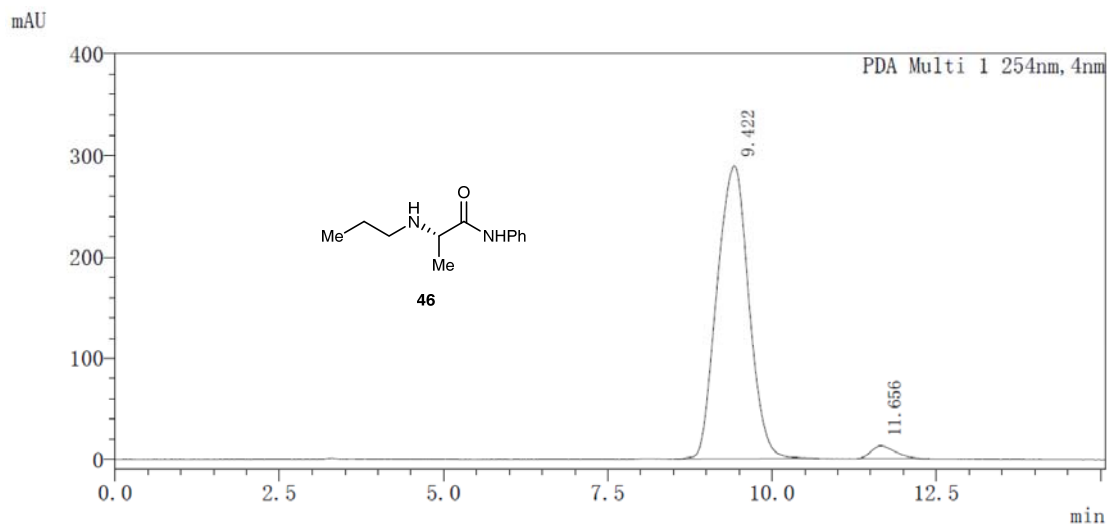

Peak Table

PDA Ch1 254nm

| Peak# | Ret. Time | Area    | Area%  |
|-------|-----------|---------|--------|
| 1     | 9.422     | 9751382 | 96.840 |
| 2     | 11.656    | 318207  | 3.160  |

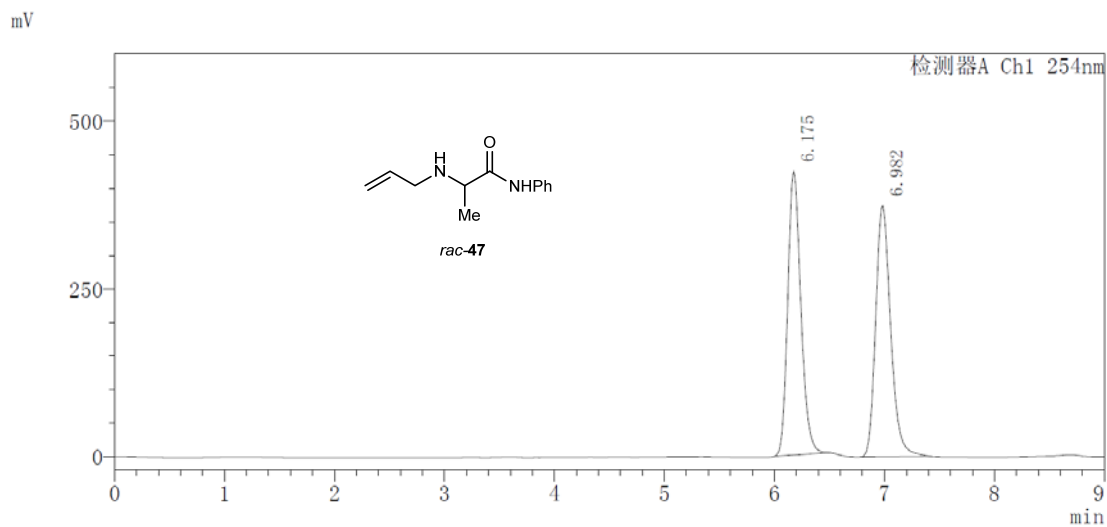

Peak Table

检测器A Ch1 254nm

| Peak# | Ret. Time | Area    | Area%  |
|-------|-----------|---------|--------|
| 1     | 6.175     | 3514131 | 49.664 |
| 2     | 6.982     | 3561671 | 50.336 |

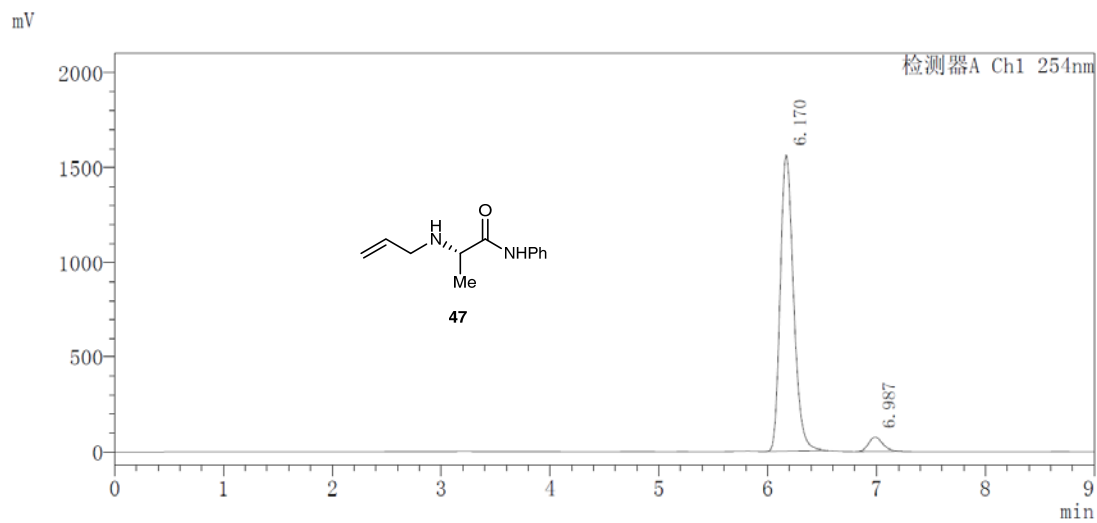

Peak Table

检测器A Ch1 254nm

| Peak# | Ret. Time | Area     | Area%  |
|-------|-----------|----------|--------|
| 1     | 6.170     | 13333121 | 95.047 |
| 2     | 6.987     | 694756   | 4.953  |

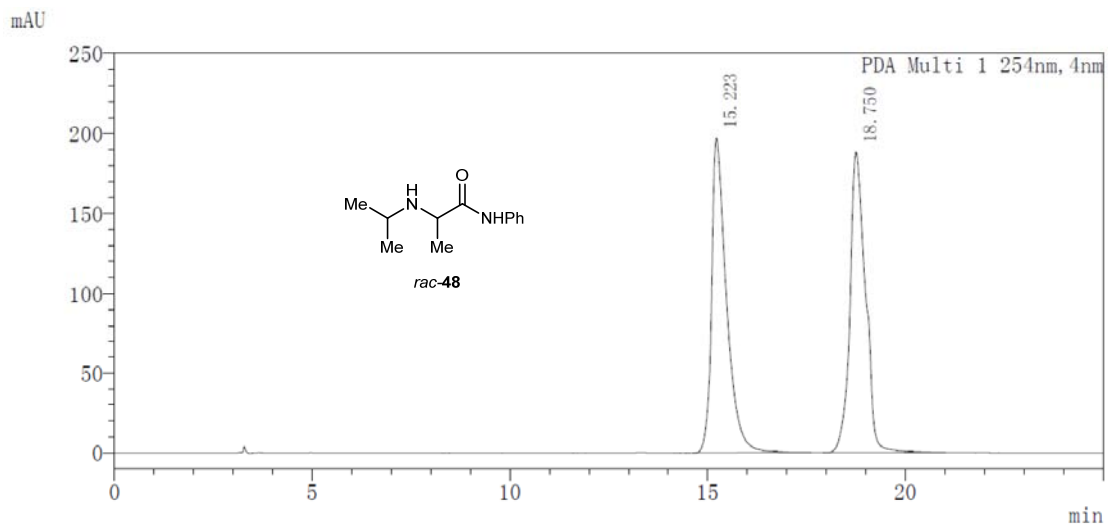

Peak Table

PDA Ch1 254nm

| Peak# | Ret. Time | Area    | Area%  |
|-------|-----------|---------|--------|
| 1     | 15.223    | 5164550 | 49.981 |
| 2     | 18.750    | 5168442 | 50.019 |

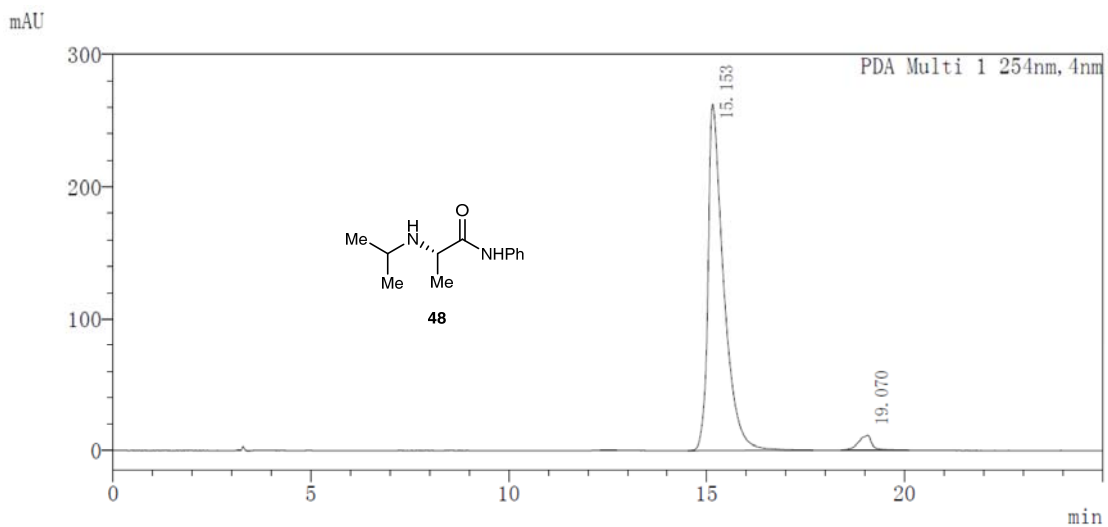

Peak Table

PDA Ch1 254nm

| Peak# | Ret. Time | Area    | Area%  |
|-------|-----------|---------|--------|
| 1     | 15.153    | 7228395 | 96.585 |
| 2     | 19.070    | 255580  | 3.415  |



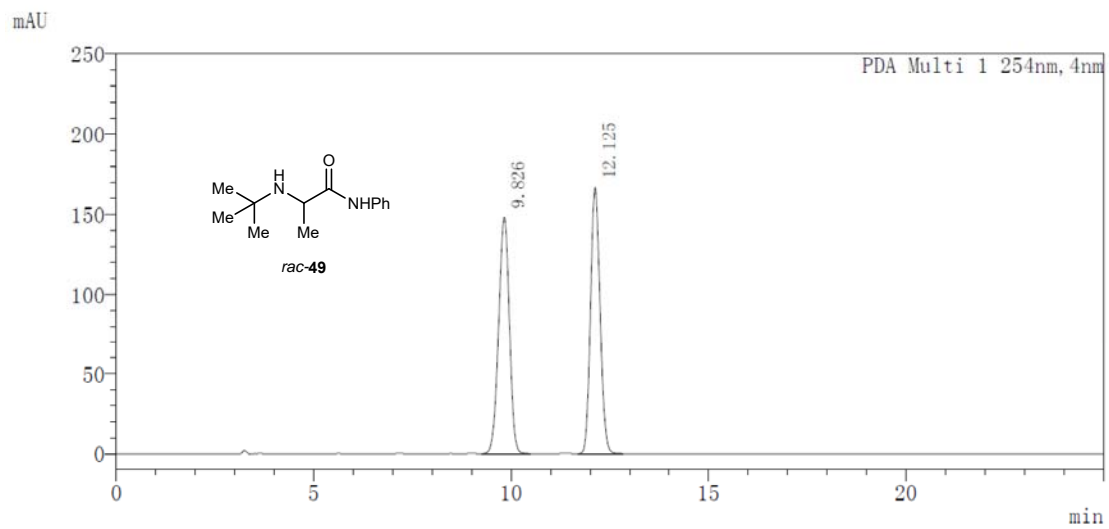

Peak Table

PDA Ch1 254nm

| Peak# | Ret. Time | Area    | Area%  |
|-------|-----------|---------|--------|
| 1     | 9.826     | 2807026 | 50.068 |
| 2     | 12.125    | 2799360 | 49.932 |

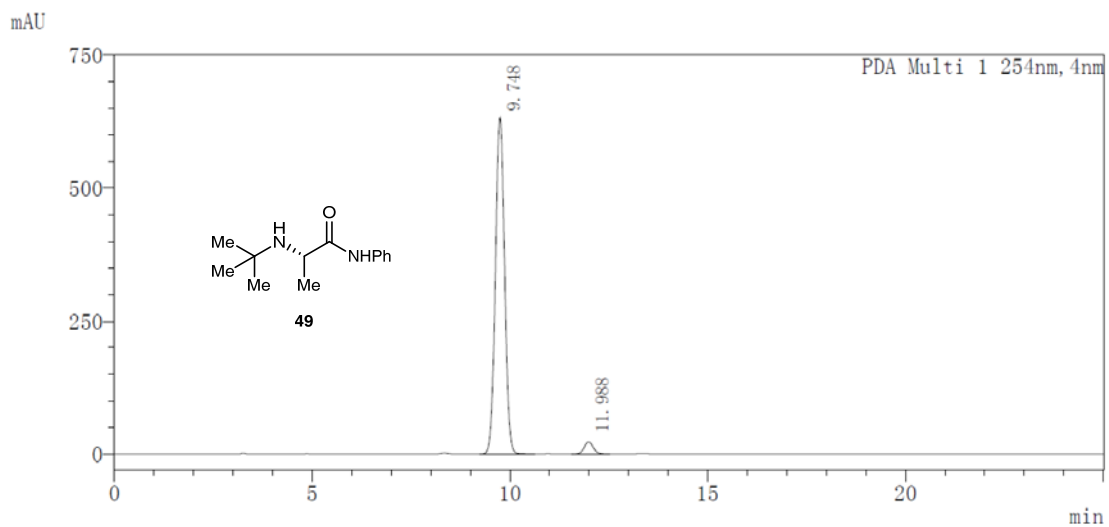

Peak Table

PDA Ch1 254nm

| Peak# | Ret. Time | Area     | Area%  |
|-------|-----------|----------|--------|
| 1     | 9.748     | 10220232 | 96.573 |
| 2     | 11.988    | 362667   | 3.427  |

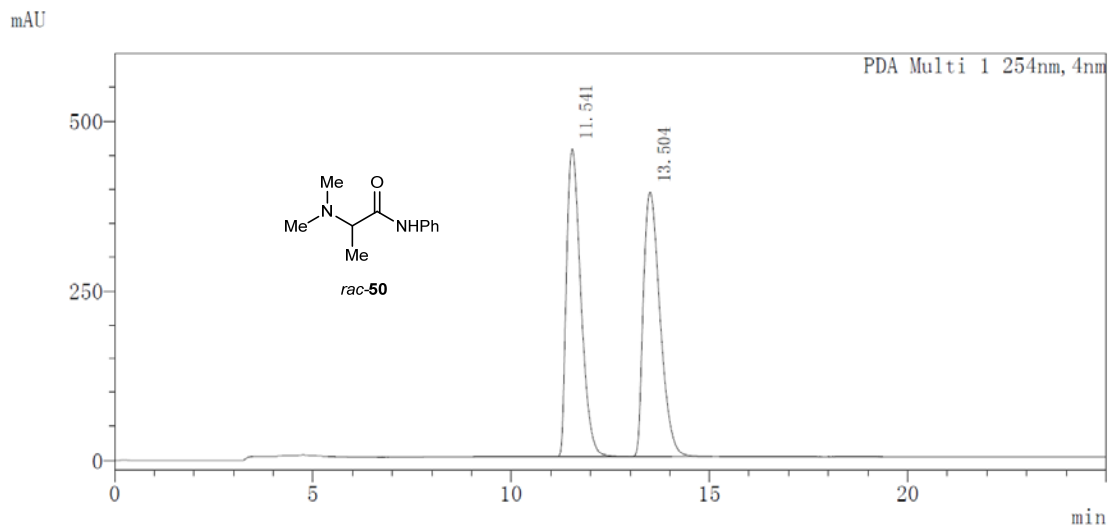

Peak Table

PDA Ch1 254nm

| Peak# | Ret. Time | Area     | Area%  |
|-------|-----------|----------|--------|
| 1     | 11.541    | 11404279 | 50.008 |
| 2     | 13.504    | 11400586 | 49.992 |

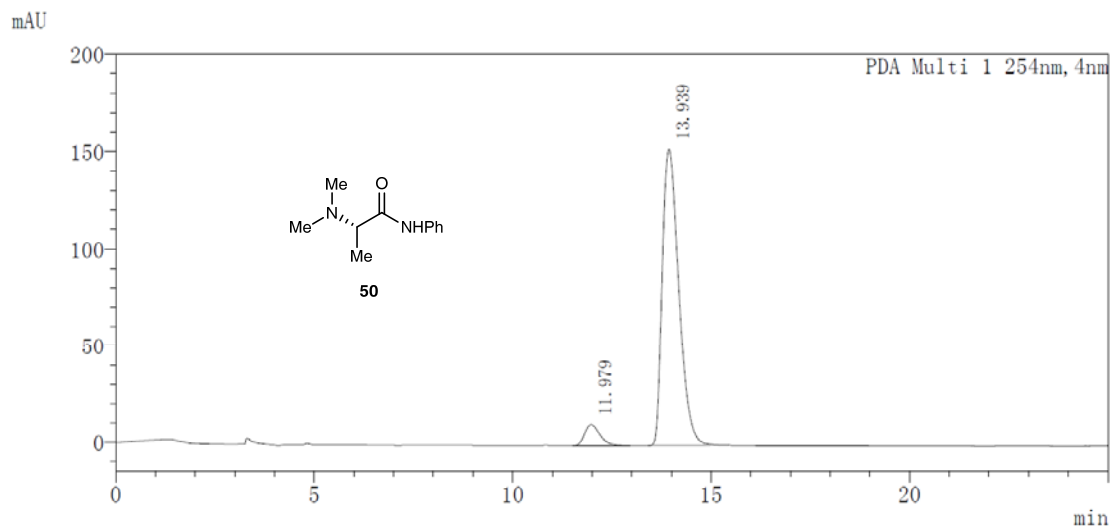

Peak Table

PDA Ch1 254nm

| Peak# | Ret. Time | Area    | Area%  |
|-------|-----------|---------|--------|
| 1     | 11.979    | 273777  | 5.834  |
| 2     | 13.939    | 4419327 | 94.166 |

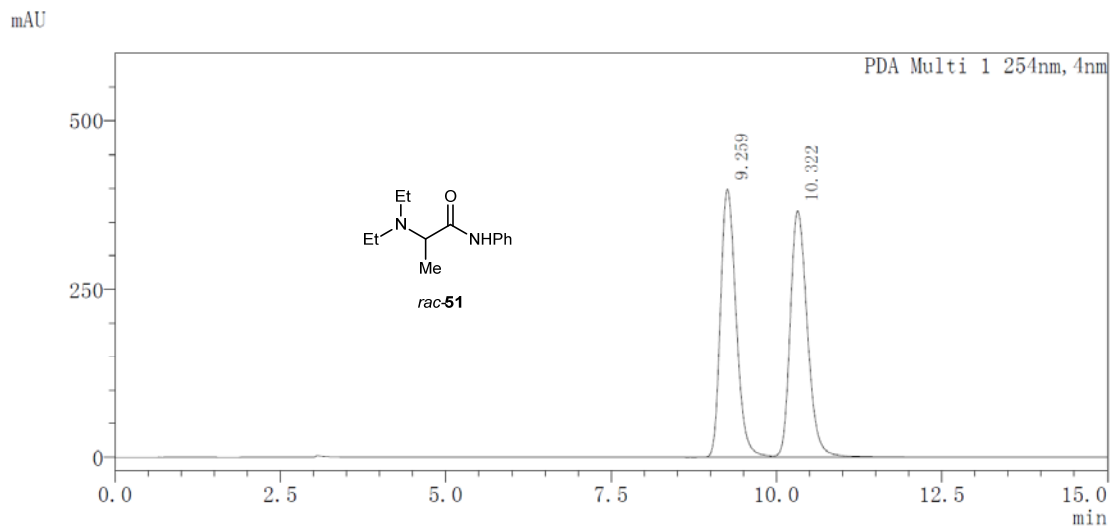

Peak Table

PDA Ch1 254nm

| Peak# | Ret. Time | Area    | Area%  |
|-------|-----------|---------|--------|
| 1     | 9.259     | 6530867 | 49.615 |
| 2     | 10.322    | 6632263 | 50.385 |

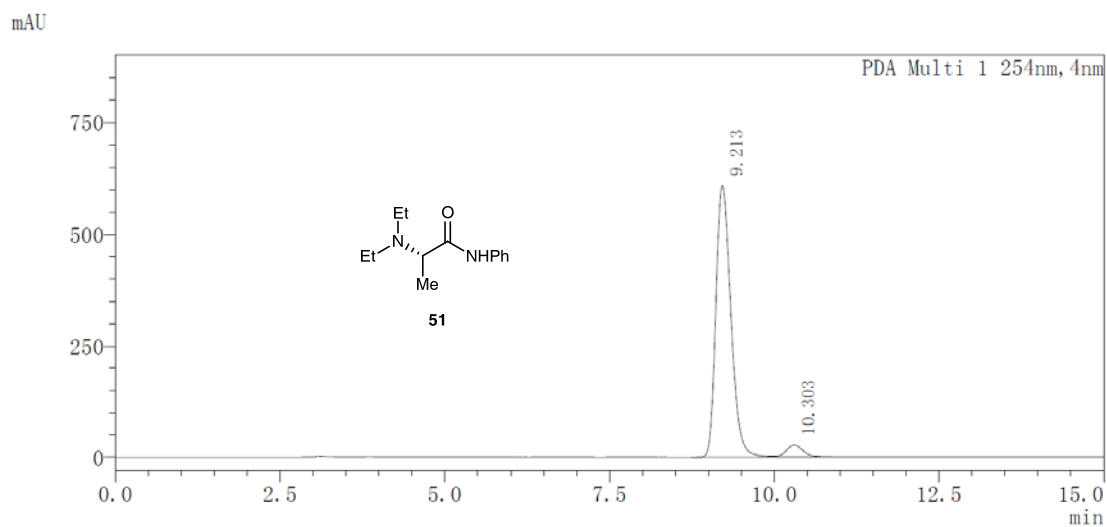

Peak Table

PDA Ch1 254nm

| Peak# | Ret. Time | Area    | Area%  |
|-------|-----------|---------|--------|
| 1     | 9.213     | 9664528 | 95.048 |
| 2     | 10.303    | 503531  | 4.952  |

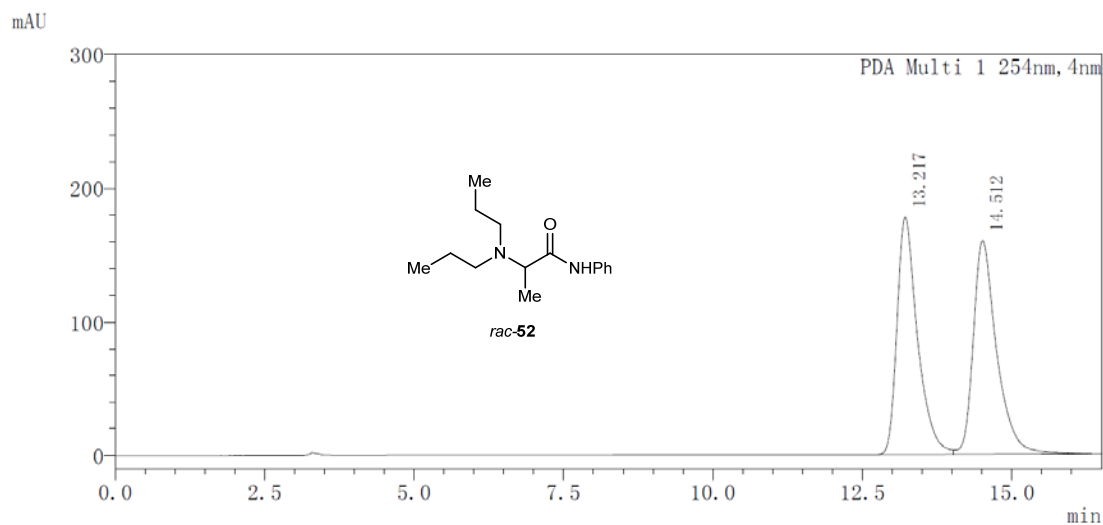

Peak Table

PDA Ch1 254nm

| Peak# | Ret. Time | Area    | Area%  |
|-------|-----------|---------|--------|
| 1     | 13.217    | 4234402 | 49.321 |
| 2     | 14.512    | 4350928 | 50.679 |

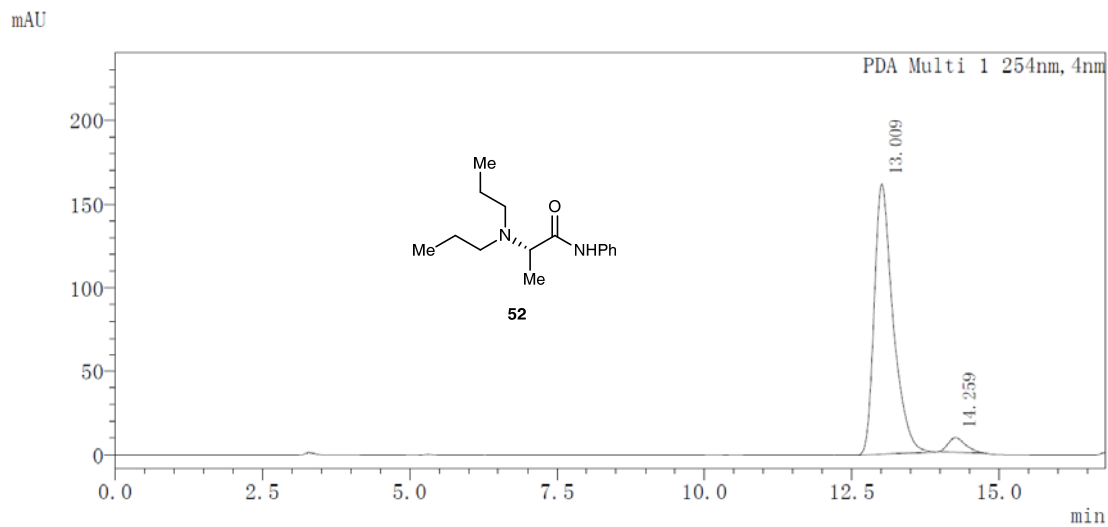

Peak Table

PDA Ch1 254nm

| Peak# | Ret. Time | Area    | Area%  |
|-------|-----------|---------|--------|
| 1     | 13.009    | 3597071 | 95.357 |
| 2     | 14.259    | 175132  | 4.643  |

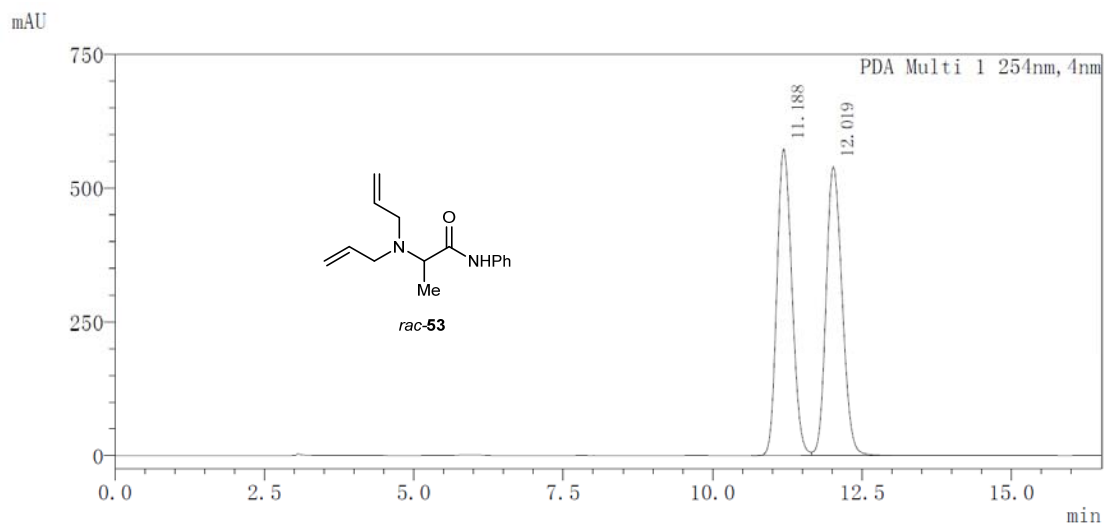

Peak Table

PDA Ch1 254nm

| Peak# | Ret. Time | Area     | Area%  |
|-------|-----------|----------|--------|
| 1     | 11.188    | 10013536 | 49.804 |
| 2     | 12.019    | 10092467 | 50.196 |

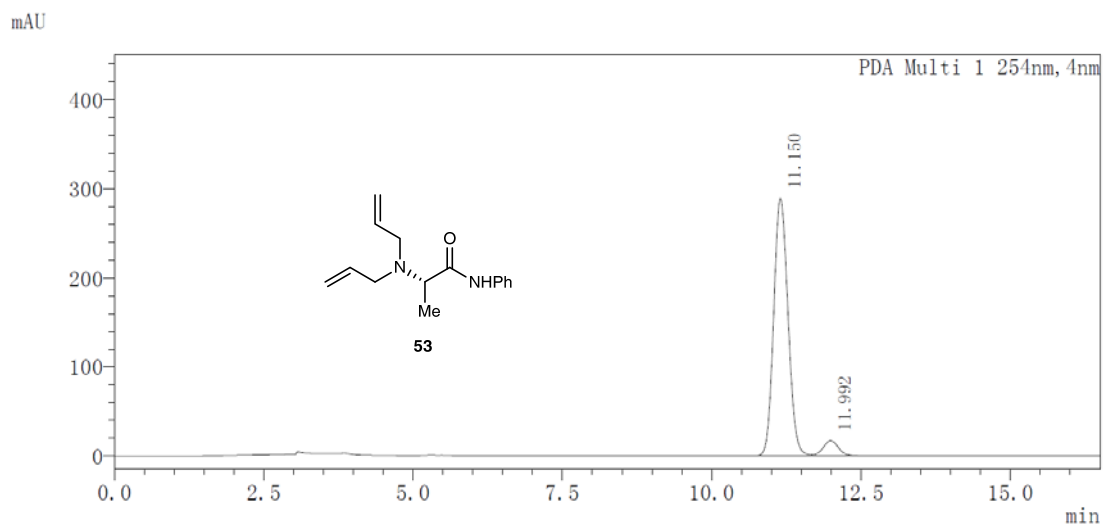

Peak Table

PDA Ch1 254nm

| Peak# | Ret. Time | Area    | Area%  |
|-------|-----------|---------|--------|
| 1     | 11.150    | 4815340 | 94.184 |
| 2     | 11.992    | 297345  | 5.816  |

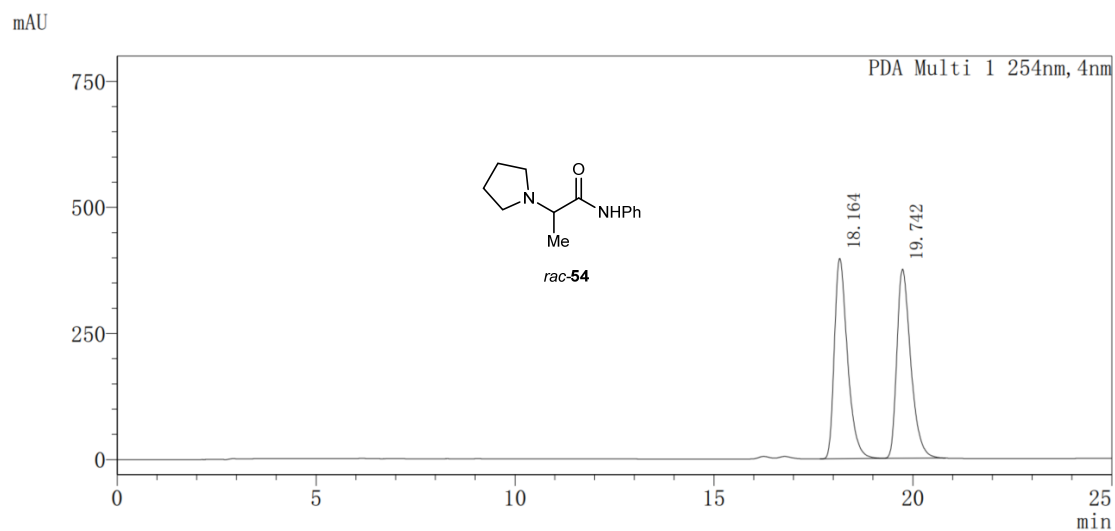

Peak Table

PDA Ch1 254nm

| Peak# | Ret. Time | Area    | Area%  |
|-------|-----------|---------|--------|
| 1     | 18.164    | 9113688 | 50.032 |
| 2     | 19.742    | 9101996 | 49.968 |

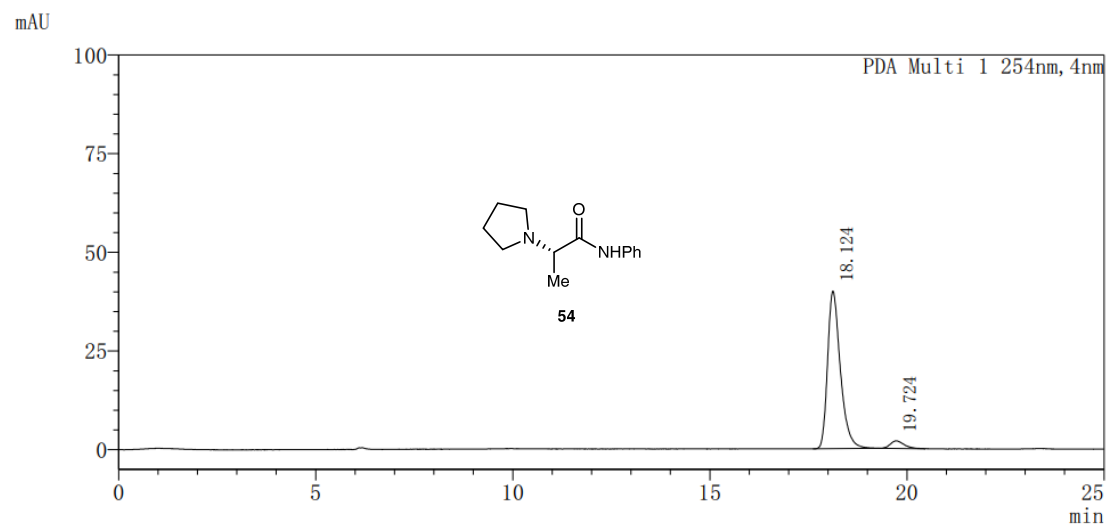

Peak Table

PDA Ch1 254nm

| Peak# | Ret. Time | Area   | Area%  |
|-------|-----------|--------|--------|
| 1     | 18.124    | 901013 | 95.107 |
| 2     | 19.724    | 46354  | 4.893  |

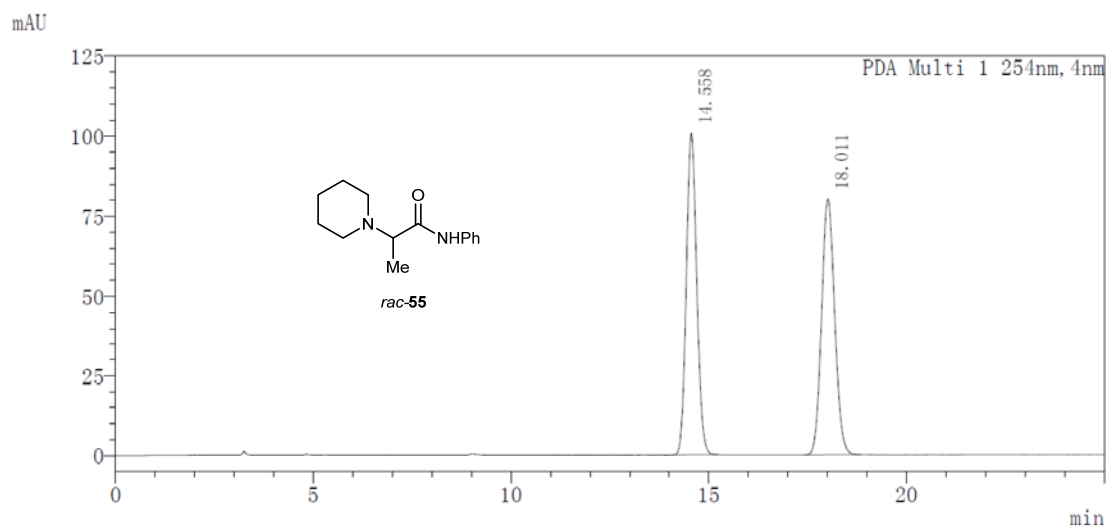

Peak Table

PDA Ch1 254nm

| Peak# | Ret. Time | Area    | Area%  |
|-------|-----------|---------|--------|
| 1     | 14.558    | 1839594 | 49.957 |
| 2     | 18.011    | 1842767 | 50.043 |

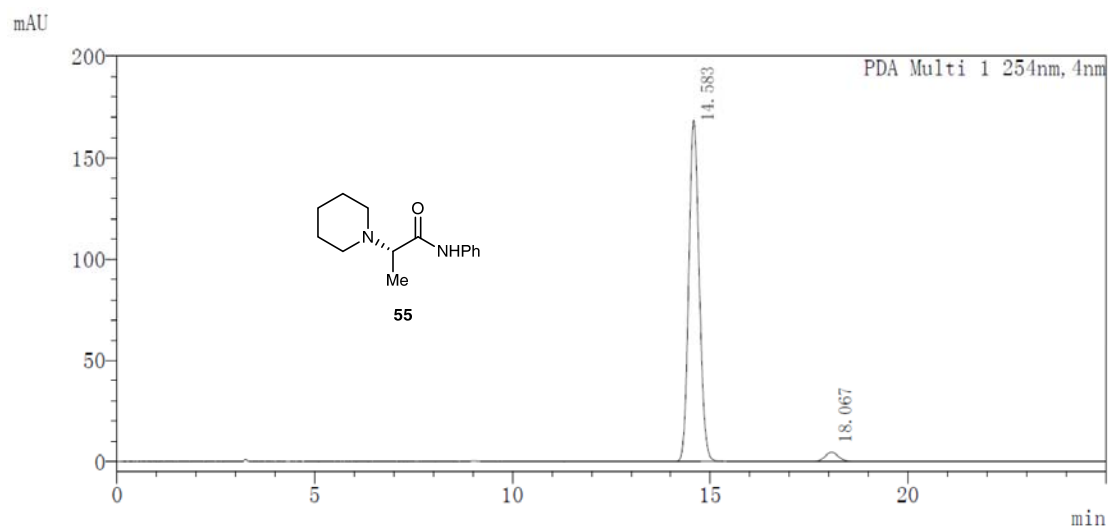

Peak Table

PDA Ch1 254nm

| Peak# | Ret. Time | Area    | Area%  |
|-------|-----------|---------|--------|
| 1     | 14.583    | 3093261 | 96.714 |
| 2     | 18.067    | 105089  | 3.286  |

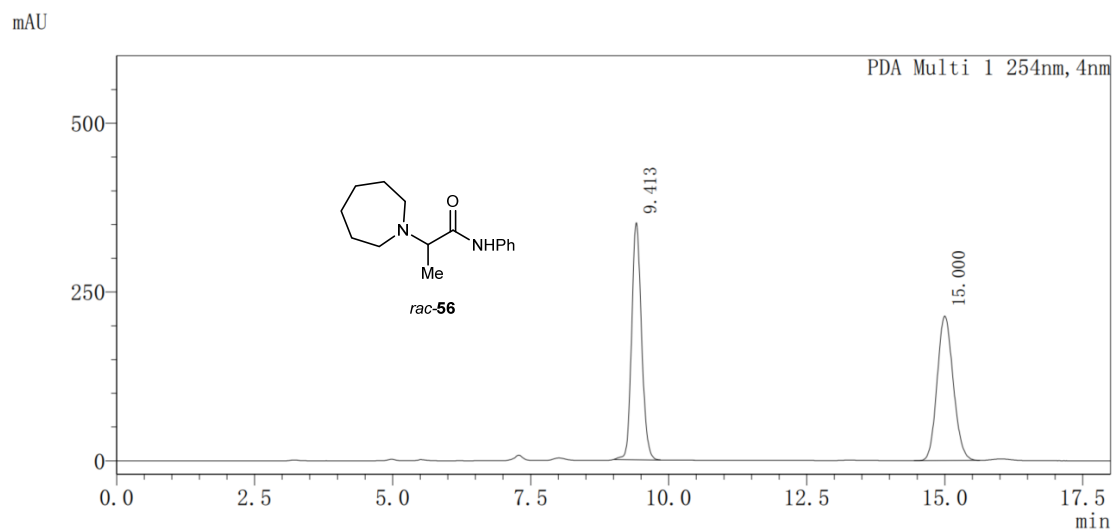

Peak Table

PDA Ch1 254nm

| Peak# | Ret. Time | Area    | Area%  |
|-------|-----------|---------|--------|
| 1     | 9.413     | 4365835 | 50.106 |
| 2     | 15.000    | 4347393 | 49.894 |

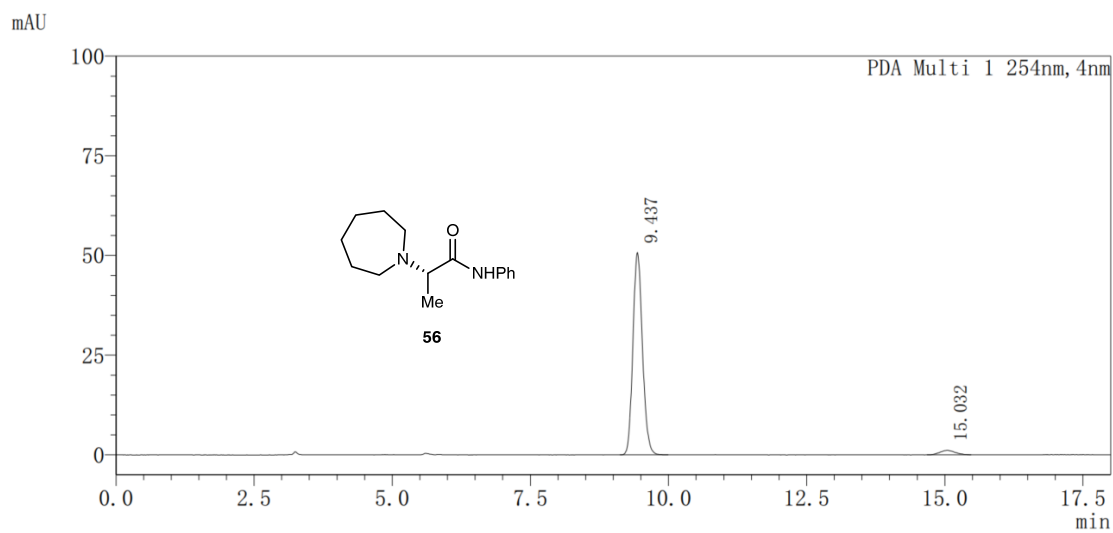

Peak Table

PDA Ch1 254nm

| Peak# | Ret. Time | Area   | Area%  |
|-------|-----------|--------|--------|
| 1     | 9.437     | 610311 | 96.584 |
| 2     | 15.032    | 21589  | 3.416  |



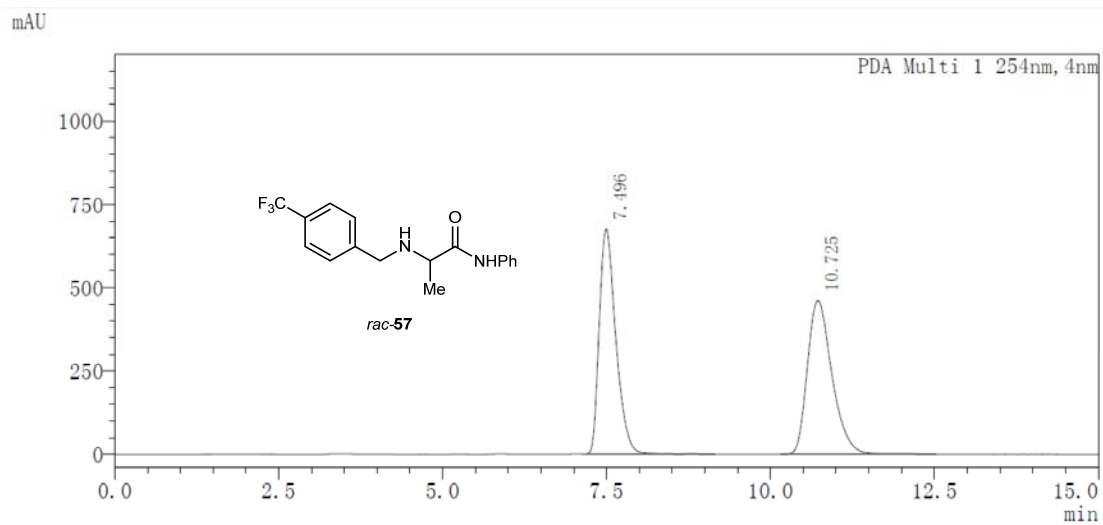

Peak Table

PDA Ch1 254nm

| Peak# | Ret. Time | Area     | Area%  |
|-------|-----------|----------|--------|
| 1     | 7.496     | 11927691 | 49.763 |
| 2     | 10.725    | 12041154 | 50.237 |

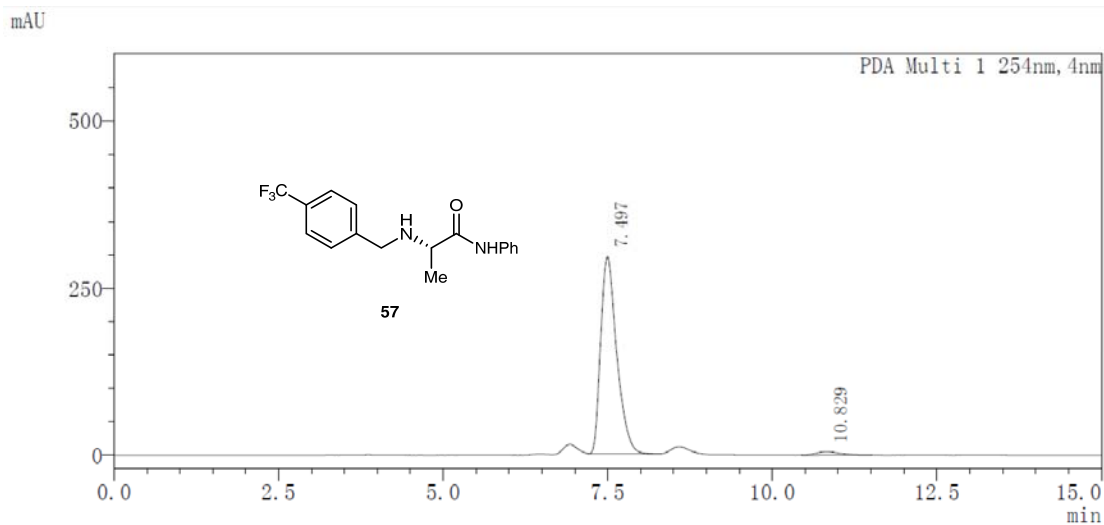

Peak Table

PDA Ch1 254nm

| Peak# | Ret. Time | Area    | Area%  |
|-------|-----------|---------|--------|
| 1     | 7.497     | 5025867 | 97.512 |
| 2     | 10.829    | 128236  | 2.488  |

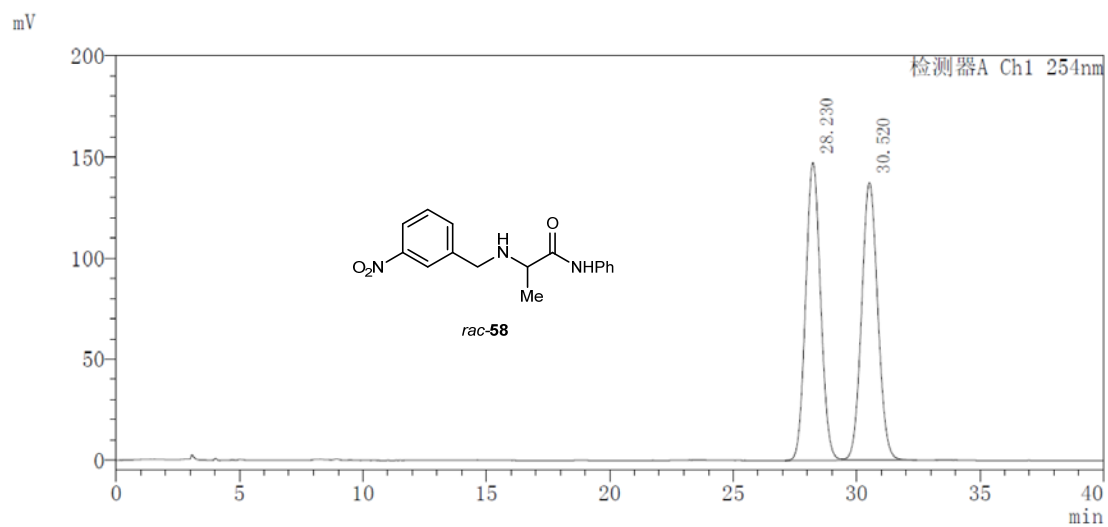

Peak Table

检测器A Ch1 254nm

| Peak# | Ret. Time | Area    | Area%  |
|-------|-----------|---------|--------|
| 1     | 28.230    | 6194929 | 49.657 |
| 2     | 30.520    | 6280517 | 50.343 |

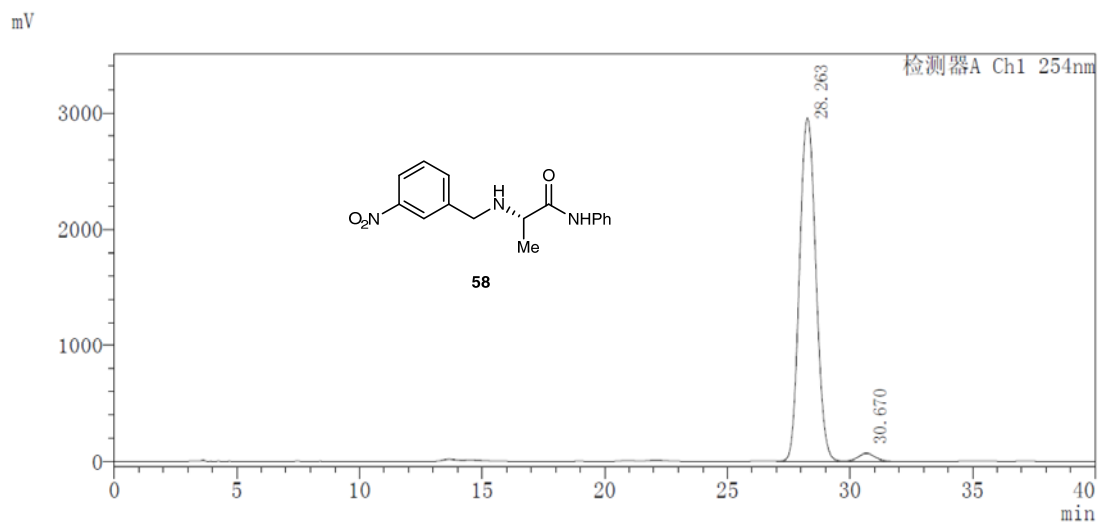

Peak Table

检测器A Ch1 254nm

| Peak# | Ret. Time | Area      | Area%  |
|-------|-----------|-----------|--------|
| 1     | 28.263    | 137312965 | 97.703 |
| 2     | 30.670    | 3228616   | 2.297  |

mAU

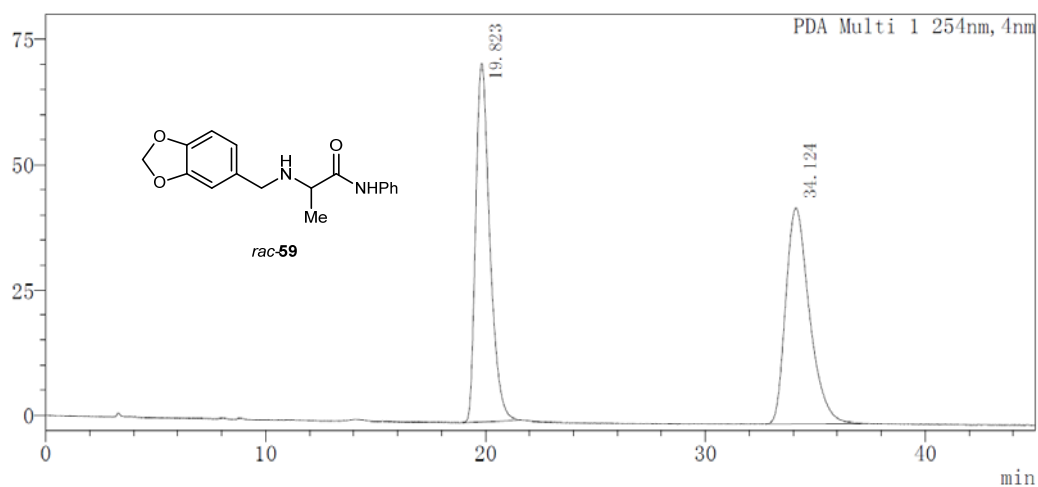

Peak Table

PDA Ch1 254nm

| Peak# | Ret. Time | Area    | Area%  |
|-------|-----------|---------|--------|
| 1     | 19.823    | 3220713 | 49.650 |
| 2     | 34.124    | 3266069 | 50.350 |

mAU

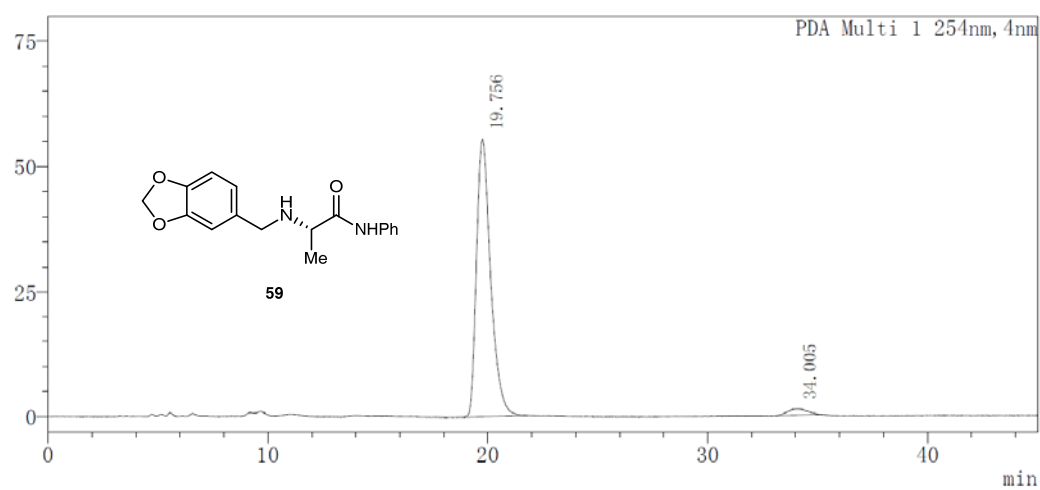

Peak Table

PDA Ch1 254nm

| Peak# | Ret. Time | Area    | Area%  |
|-------|-----------|---------|--------|
| 1     | 19.756    | 2503643 | 96.702 |
| 2     | 34.005    | 85389   | 3.298  |

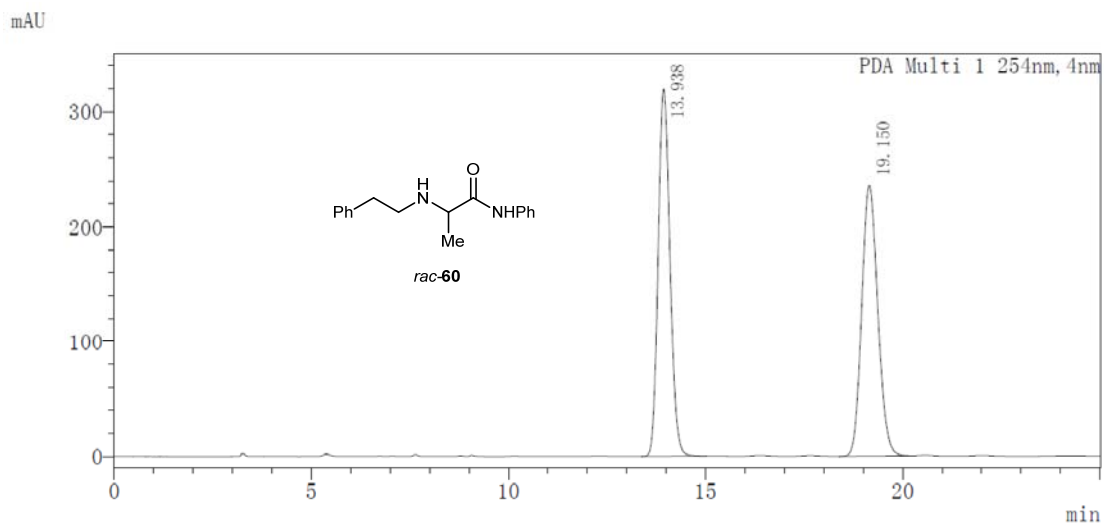

Peak Table

PDA Ch1 254nm

| Peak# | Ret. Time | Area    | Area%  |
|-------|-----------|---------|--------|
| 1     | 13.938    | 6656227 | 49.954 |
| 2     | 19.150    | 6668507 | 50.046 |

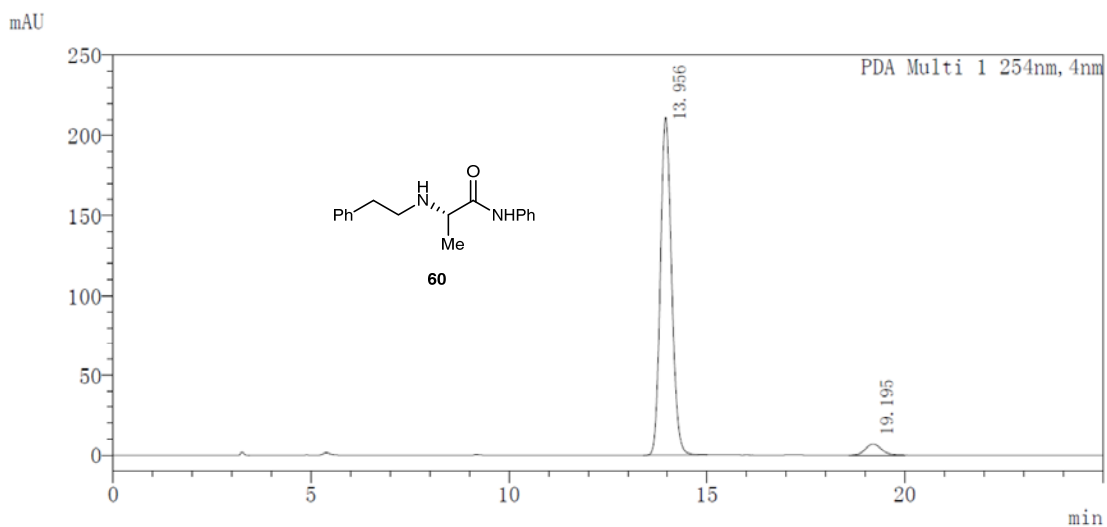

Peak Table

PDA Ch1 254nm

| Peak# | Ret. Time | Area    | Area%  |
|-------|-----------|---------|--------|
| 1     | 13.956    | 4154074 | 95.615 |
| 2     | 19.195    | 190496  | 4.385  |

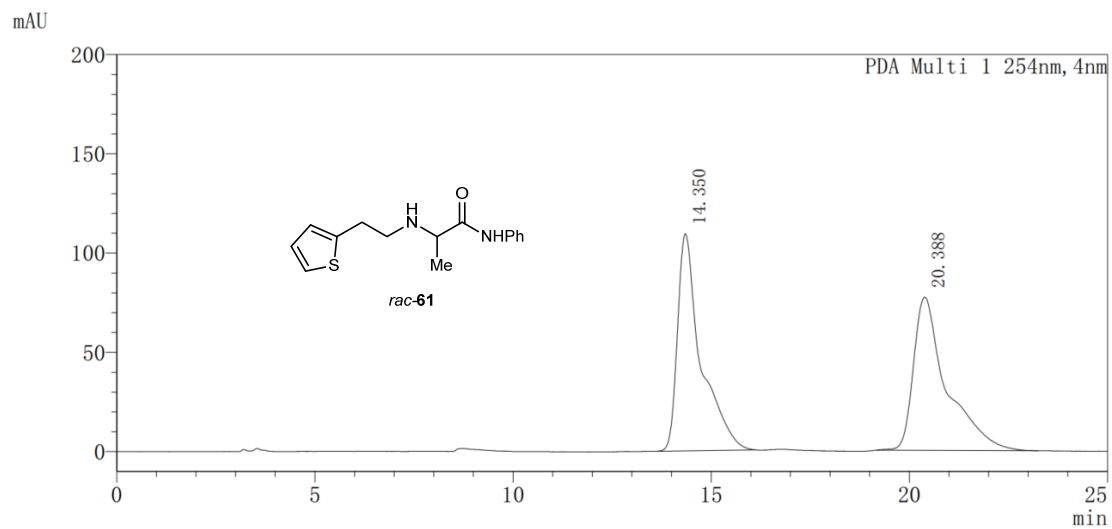

Peak Table

PDA Ch1 254nm

| Peak# | Ret. Time | Area    | Area%  |
|-------|-----------|---------|--------|
| 1     | 14.350    | 4480619 | 49.935 |
| 2     | 20.388    | 4492317 | 50.065 |

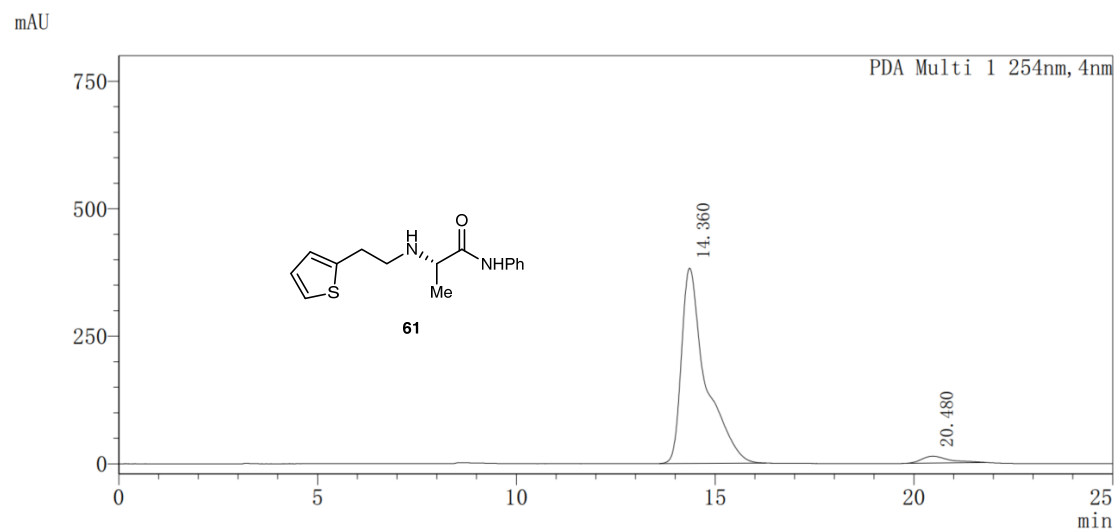

Peak Table

PDA Ch1 254nm

| Peak# | Ret. Time | Area     | Area%  |
|-------|-----------|----------|--------|
| 1     | 14.360    | 16314622 | 96.207 |
| 2     | 20.480    | 643270   | 3.793  |

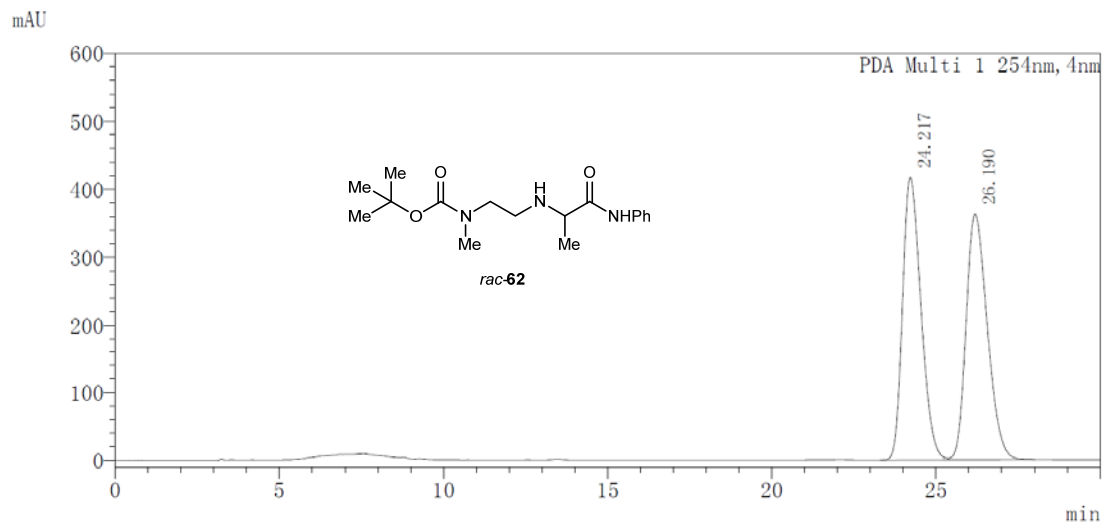

Peak Table

PDA Ch1 254nm

| Peak# | Ret. Time | Area     | Area%  |
|-------|-----------|----------|--------|
| 1     | 24.217    | 16369359 | 49.936 |
| 2     | 26.190    | 16411001 | 50.064 |

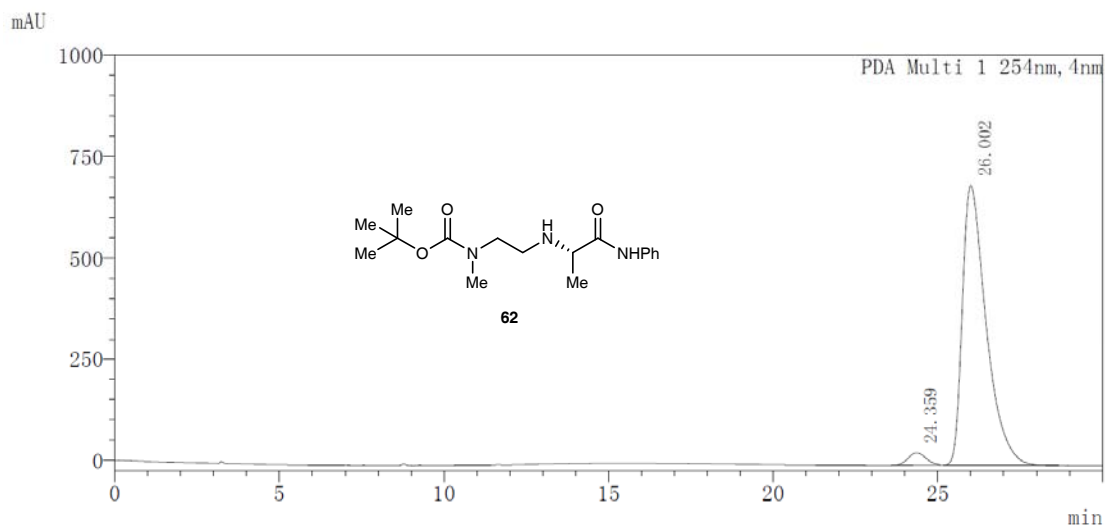

Peak Table

PDA Ch1 254nm

| Peak# | Ret. Time | Area     | Area%  |
|-------|-----------|----------|--------|
| 1     | 24.359    | 1140233  | 3.142  |
| 2     | 26.002    | 35144867 | 96.858 |

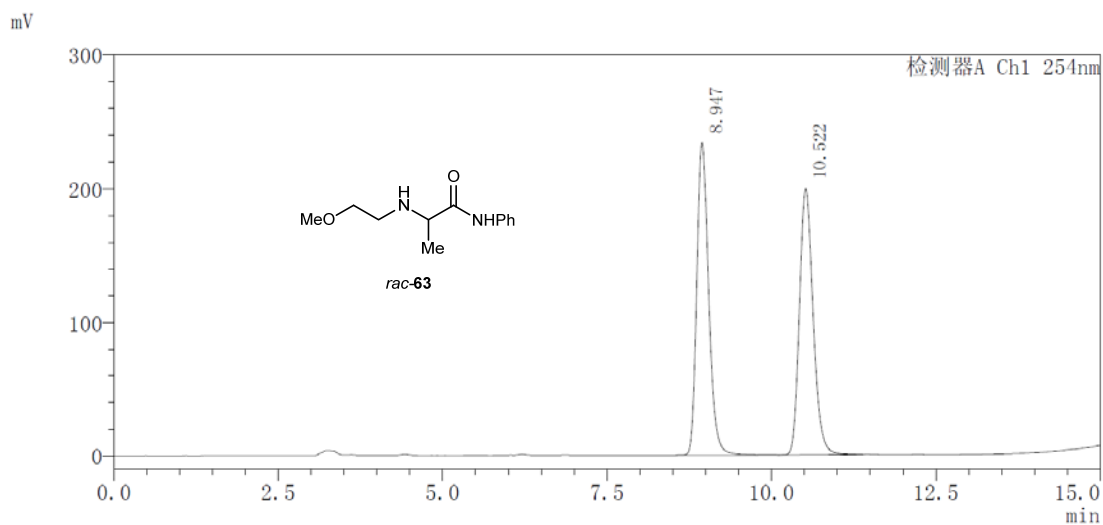

Peak Table

检测器A Ch1 254nm

| Peak# | Ret. Time | Area    | Area%  |
|-------|-----------|---------|--------|
| 1     | 8.947     | 2915283 | 50.150 |
| 2     | 10.522    | 2897853 | 49.850 |

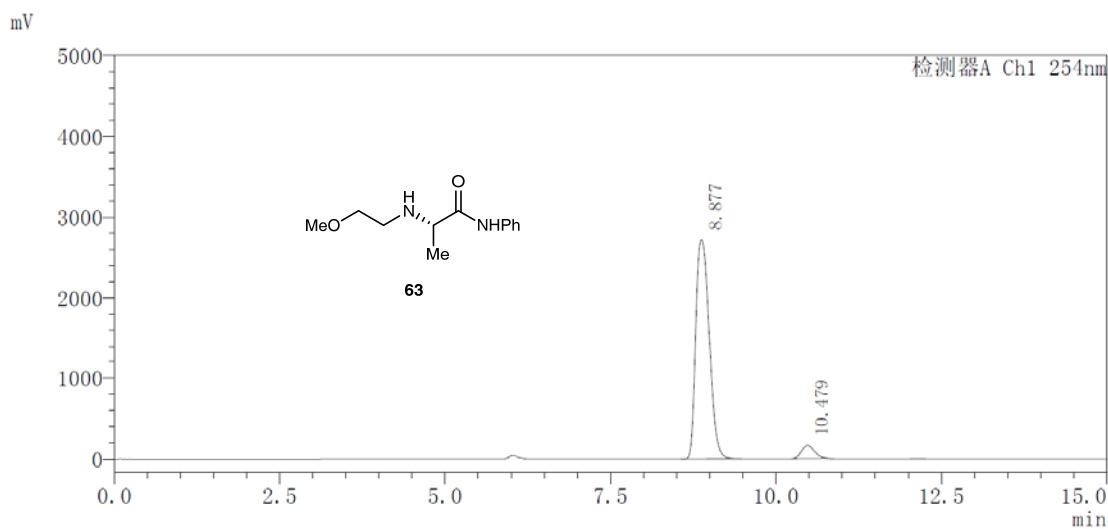

Peak Table

检测器A Ch1 254nm

| Peak# | Ret. Time | Area     | Area%  |
|-------|-----------|----------|--------|
| 1     | 8.877     | 38115387 | 94.499 |
| 2     | 10.479    | 2218688  | 5.501  |

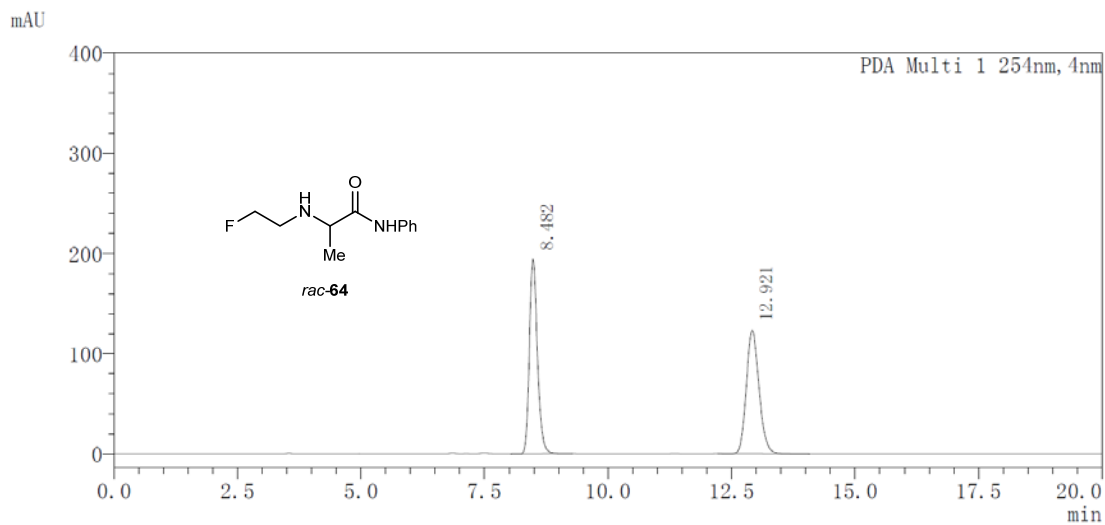

Peak Table

PDA Ch1 254nm

| Peak# | Ret. Time | Area    | Area%  |
|-------|-----------|---------|--------|
| 1     | 8.482     | 2199610 | 50.009 |
| 2     | 12.921    | 2198789 | 49.991 |

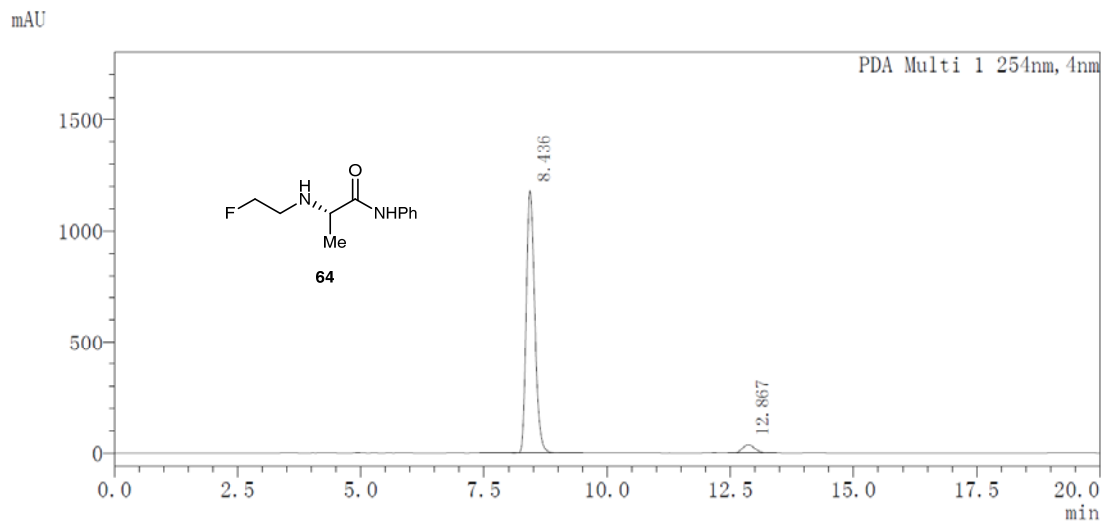

Peak Table

PDA Ch1 254nm

| Peak# | Ret. Time | Area     | Area%  |
|-------|-----------|----------|--------|
| 1     | 8.436     | 14155435 | 95.676 |
| 2     | 12.867    | 639690   | 4.324  |



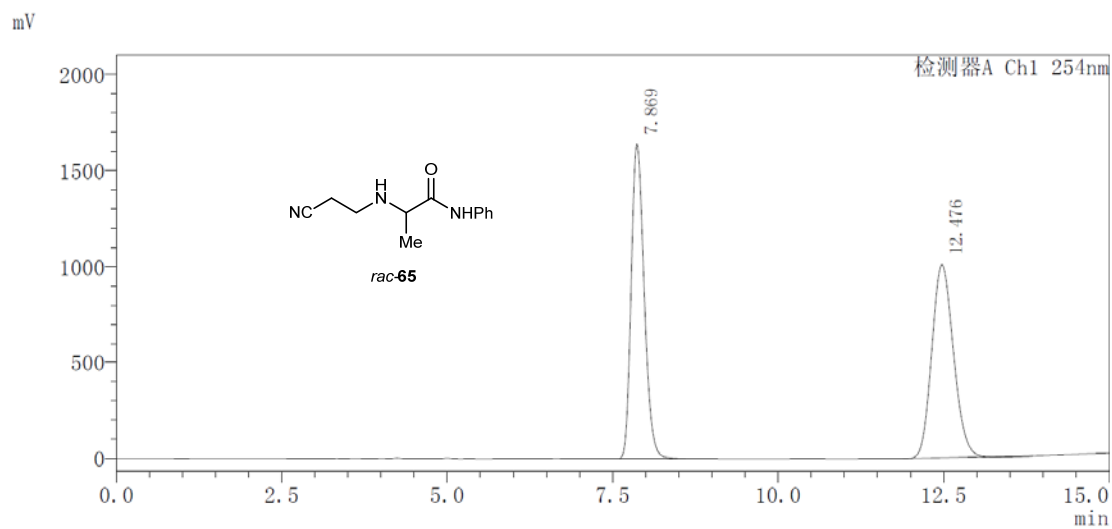

Peak Table

检测器A Ch1 254nm

| Peak# | Ret. Time | Area     | Area%  |
|-------|-----------|----------|--------|
| 1     | 7.869     | 22403695 | 49.372 |
| 2     | 12.476    | 22973529 | 50.628 |

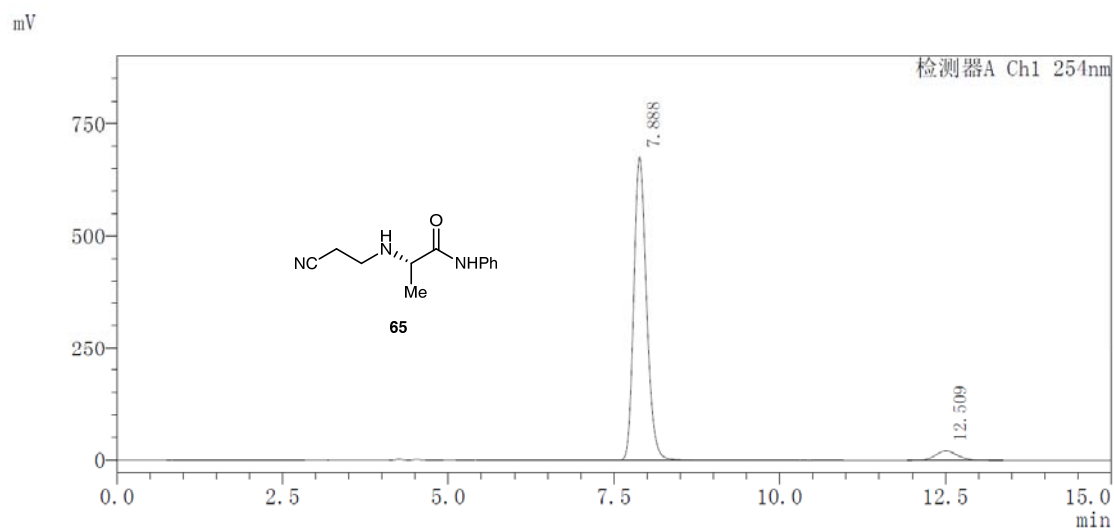

Peak Table

检测器A Ch1 254nm

| Peak# | Ret. Time | Area    | Area%  |
|-------|-----------|---------|--------|
| 1     | 7.888     | 9037236 | 95.082 |
| 2     | 12.509    | 467446  | 4.918  |

mAU

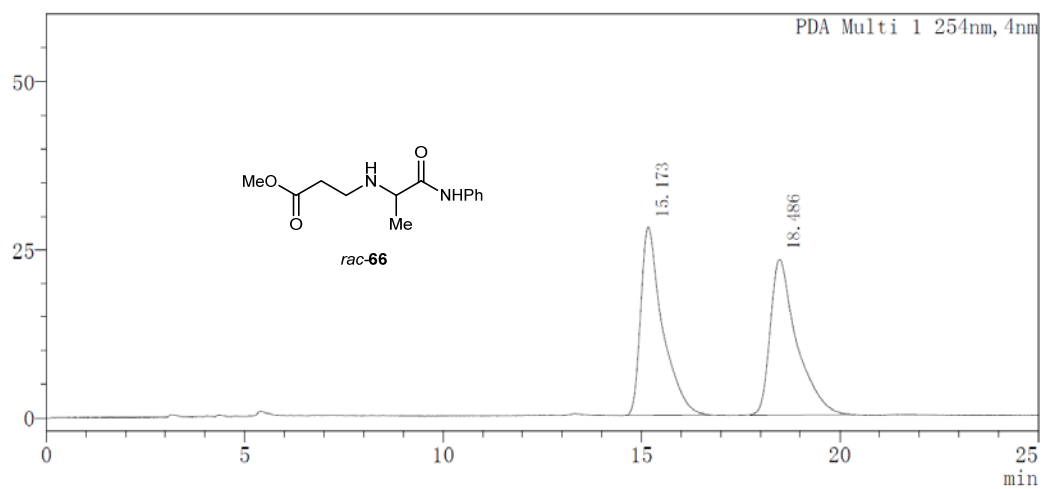

Peak Table

PDA Ch1 254nm

| Peak# | Ret. Time | Area    | Area%  |
|-------|-----------|---------|--------|
| 1     | 15.173    | 1065960 | 49.858 |
| 2     | 18.486    | 1072023 | 50.142 |

mAU

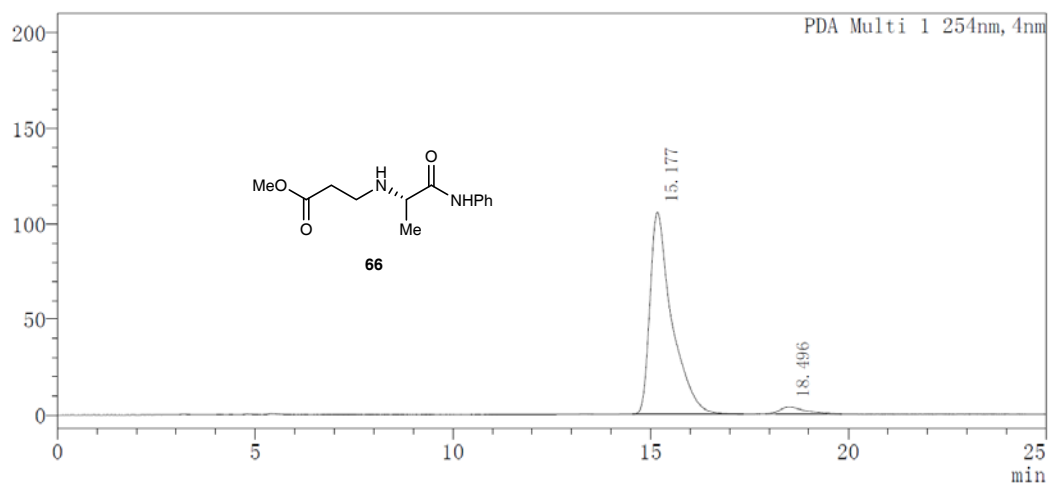

Peak Table

PDA Ch1 254nm

| Peak# | Ret. Time | Area    | Area%  |
|-------|-----------|---------|--------|
| 1     | 15.177    | 4065792 | 96.148 |
| 2     | 18.496    | 162885  | 3.852  |

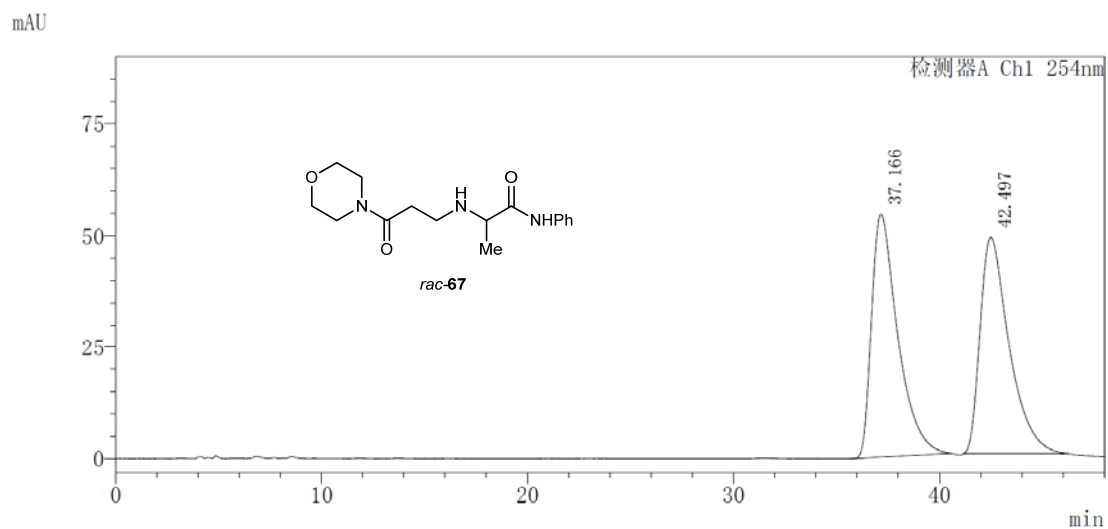

Peak Table

检测器A Ch1 254nm

| Peak# | Ret. Time | Area    | Area%  |
|-------|-----------|---------|--------|
| 1     | 37.166    | 4812377 | 50.192 |
| 2     | 42.497    | 4775589 | 49.808 |

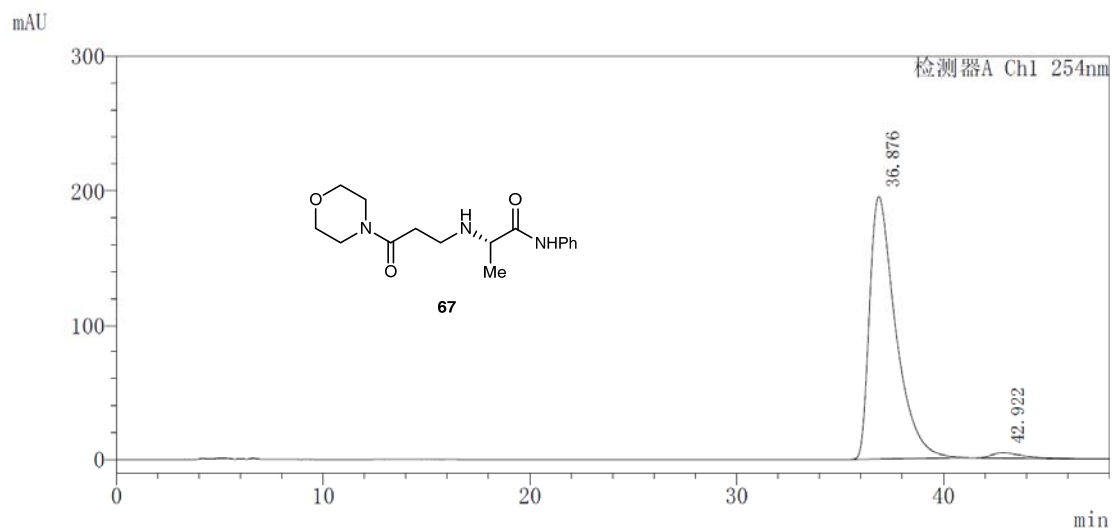

Peak Table

检测器A Ch1 254nm

| Peak# | Ret. Time | Area     | Area%  |
|-------|-----------|----------|--------|
| 1     | 36.876    | 17173442 | 97.701 |
| 2     | 42.922    | 404076   | 2.299  |

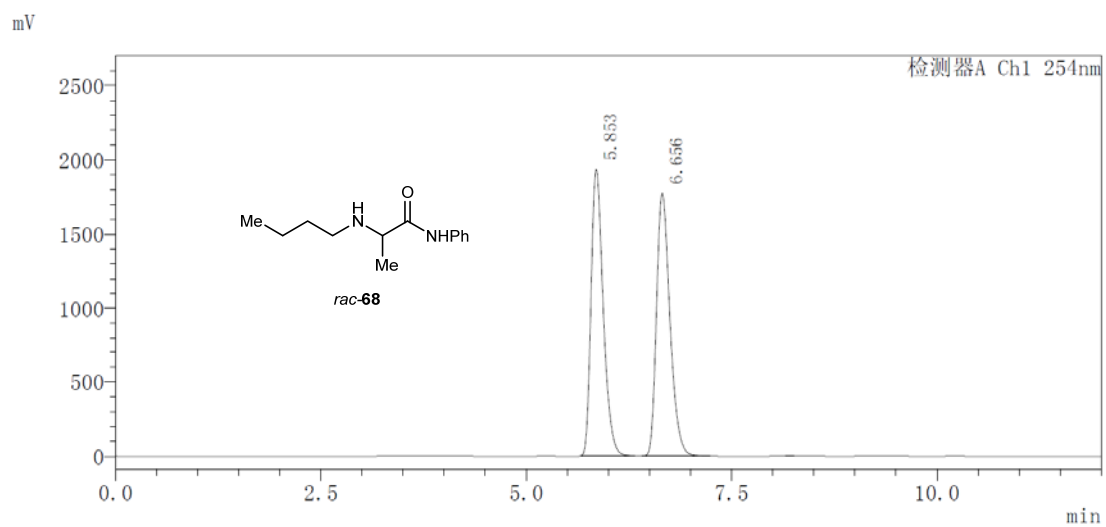

Peak Table

检测器A Ch1 254nm

| Peak# | Ret. Time | Area     | Area%  |
|-------|-----------|----------|--------|
| 1     | 5.853     | 19885078 | 49.597 |
| 2     | 6.656     | 20207917 | 50.403 |

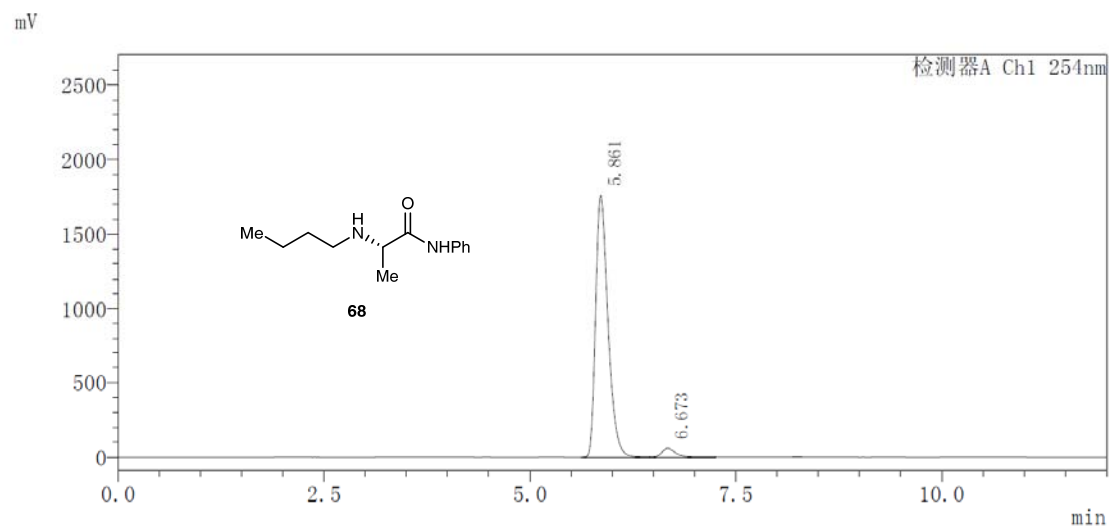

Peak Table

检测器A Ch1 254nm

| Peak# | Ret. Time | Area     | Area%  |
|-------|-----------|----------|--------|
| 1     | 5.861     | 18363481 | 96.305 |
| 2     | 6.673     | 704558   | 3.695  |

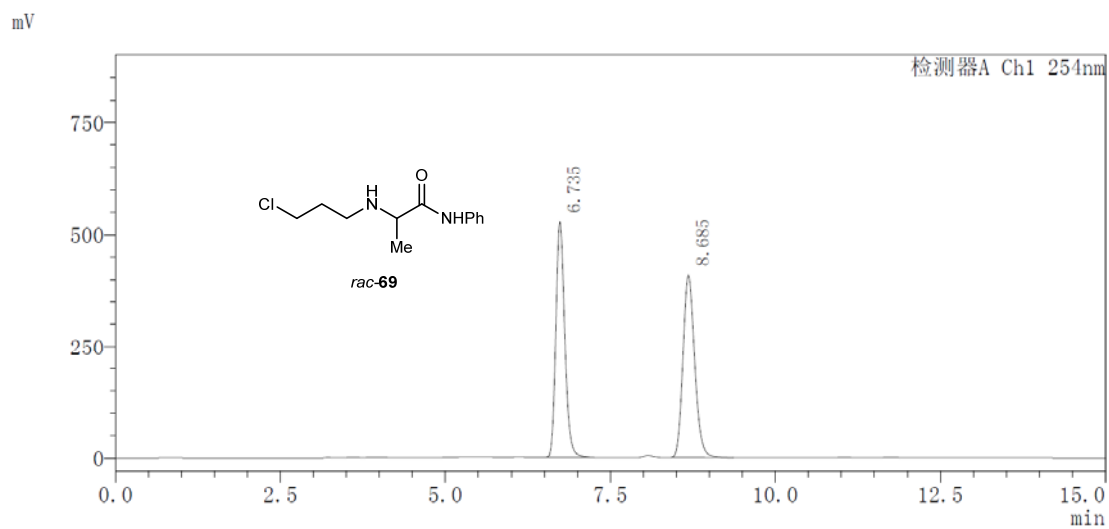

Peak Table

检测器A Ch1 254nm

| Peak# | Ret. Time | Area    | Area%  |
|-------|-----------|---------|--------|
| 1     | 6.735     | 4978151 | 49.609 |
| 2     | 8.685     | 5056684 | 50.391 |

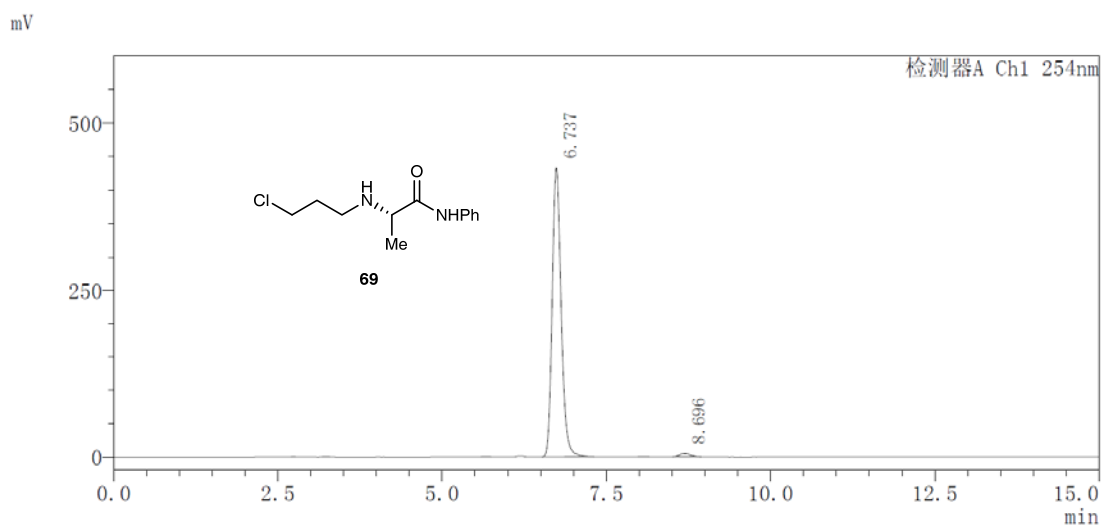

Peak Table

检测器A Ch1 254nm

| Peak# | Ret. Time | Area    | Area%  |
|-------|-----------|---------|--------|
| 1     | 6.737     | 4096946 | 98.658 |
| 2     | 8.696     | 55745   | 1.342  |

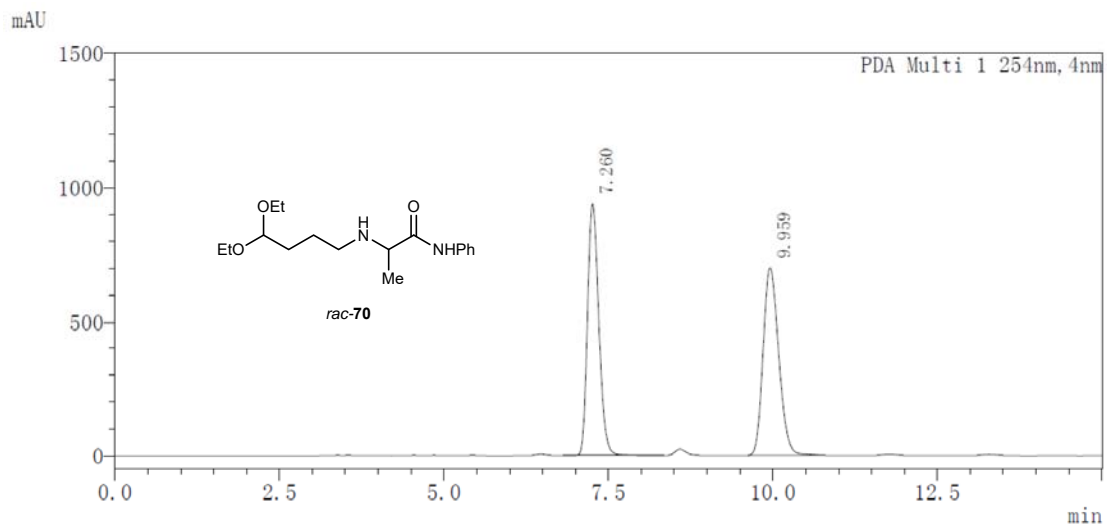

Peak Table

PDA Ch1 254nm

| Peak# | Ret. Time | Area     | Area%  |
|-------|-----------|----------|--------|
| 1     | 7.260     | 11254300 | 49.342 |
| 2     | 9.959     | 11554681 | 50.658 |

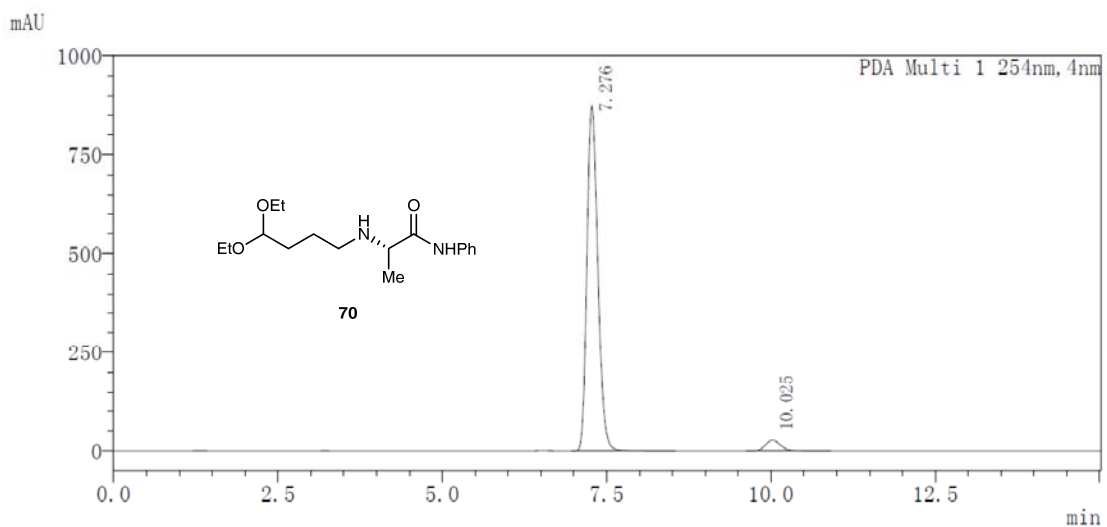

Peak Table

PDA Ch1 254nm

| Peak# | Ret. Time | Area     | Area%  |
|-------|-----------|----------|--------|
| 1     | 7.276     | 10116398 | 95.632 |
| 2     | 10.025    | 462118   | 4.368  |

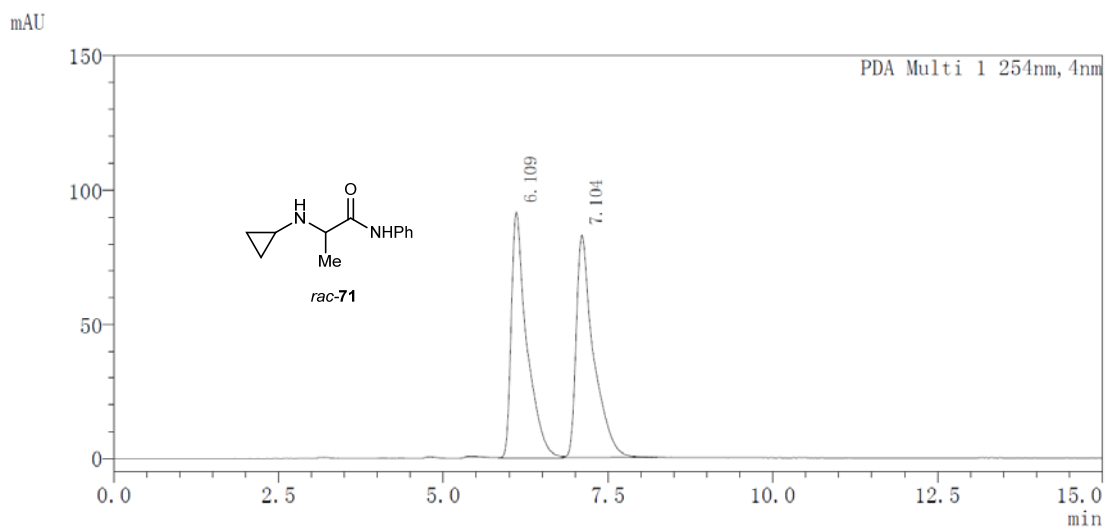

Peak Table

PDA Ch1 254nm

| Peak# | Ret. Time | Area    | Area%  |
|-------|-----------|---------|--------|
| 1     | 6.109     | 1501668 | 49.735 |
| 2     | 7.104     | 1517697 | 50.265 |

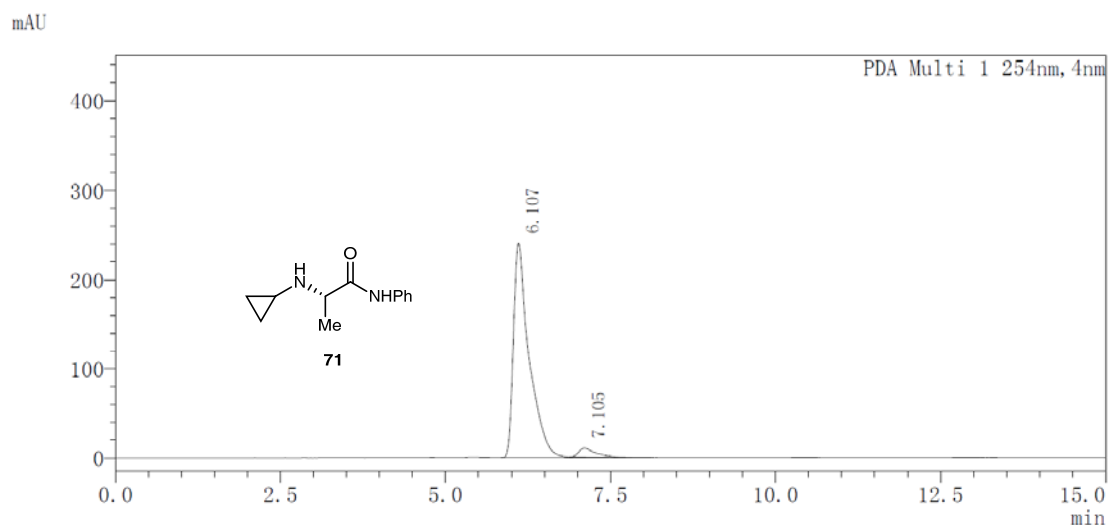

Peak Table

PDA Ch1 254nm

| Peak# | Ret. Time | Area    | Area%  |
|-------|-----------|---------|--------|
| 1     | 6.107     | 4005610 | 95.665 |
| 2     | 7.105     | 181503  | 4.335  |

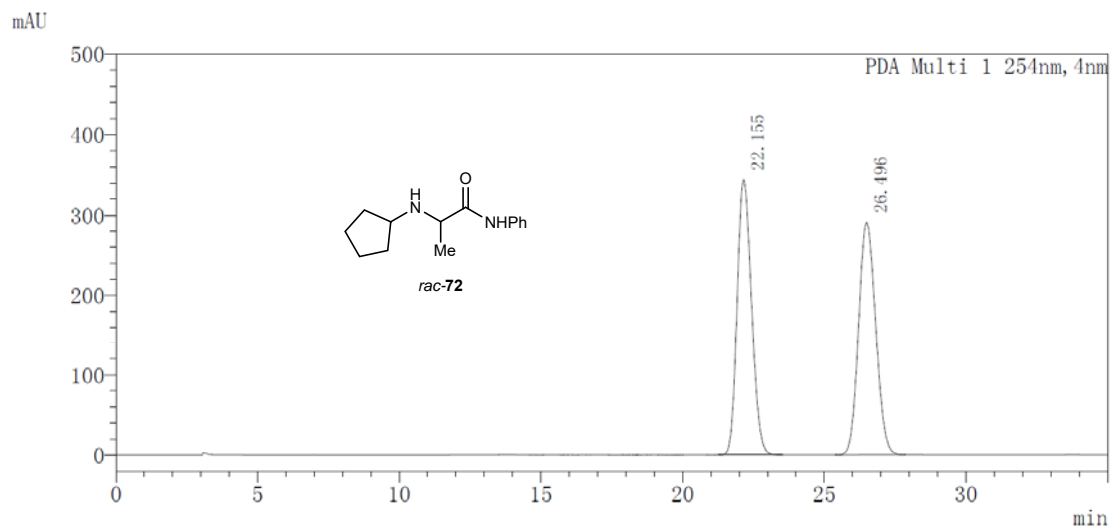

Peak Table

PDA Ch1 254nm

| Peak# | Ret. Time | Area     | Area%  |
|-------|-----------|----------|--------|
| 1     | 22.155    | 12157328 | 49.899 |
| 2     | 26.496    | 12206470 | 50.101 |

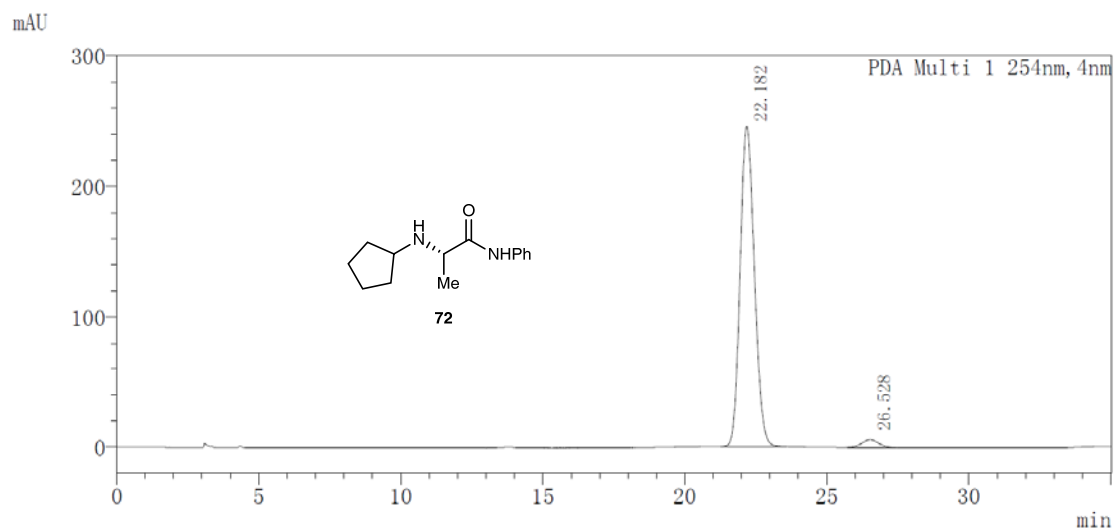

Peak Table

PDA Ch1 254nm

| Peak# | Ret. Time | Area    | Area%  |
|-------|-----------|---------|--------|
| 1     | 22.182    | 8577778 | 97.325 |
| 2     | 26.528    | 235793  | 2.675  |



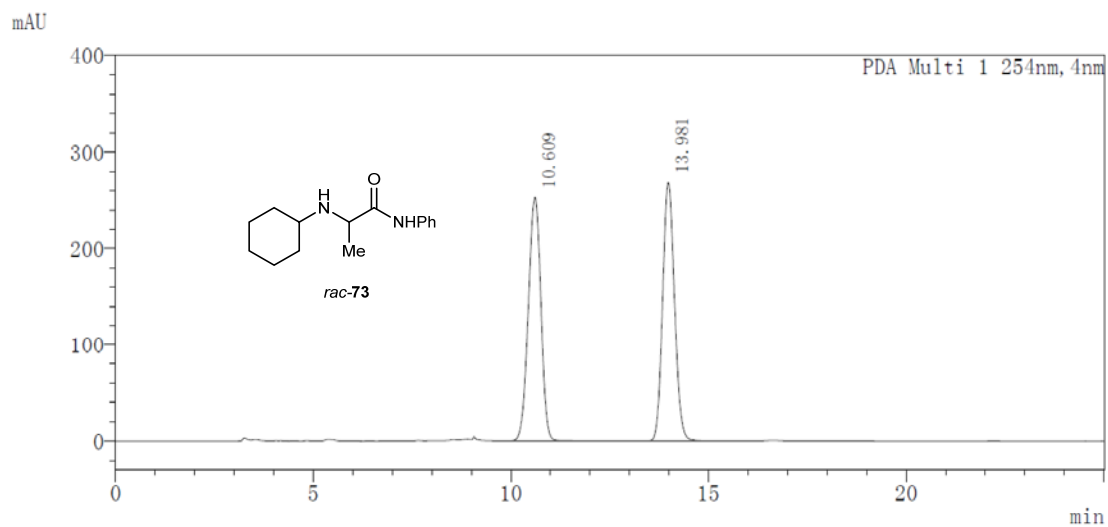

Peak Table

PDA Ch1 254nm

| Peak# | Ret. Time | Area    | Area%  |
|-------|-----------|---------|--------|
| 1     | 10.609    | 5590956 | 49.966 |
| 2     | 13.981    | 5598480 | 50.034 |

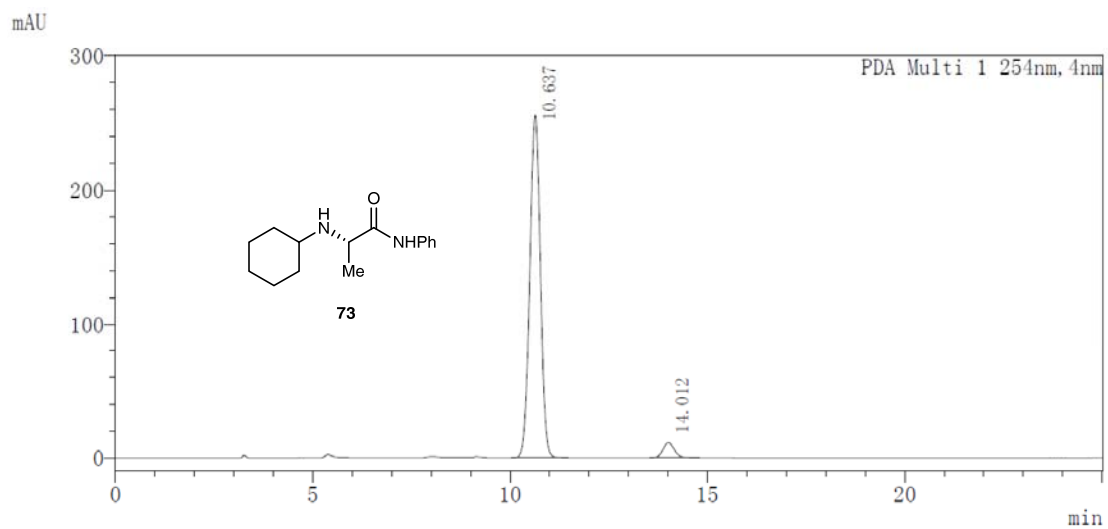

Peak Table

PDA Ch1 254nm

| Peak# | Ret. Time | Area    | Area%  |
|-------|-----------|---------|--------|
| 1     | 10.637    | 4769365 | 95.464 |
| 2     | 14.012    | 226614  | 4.536  |

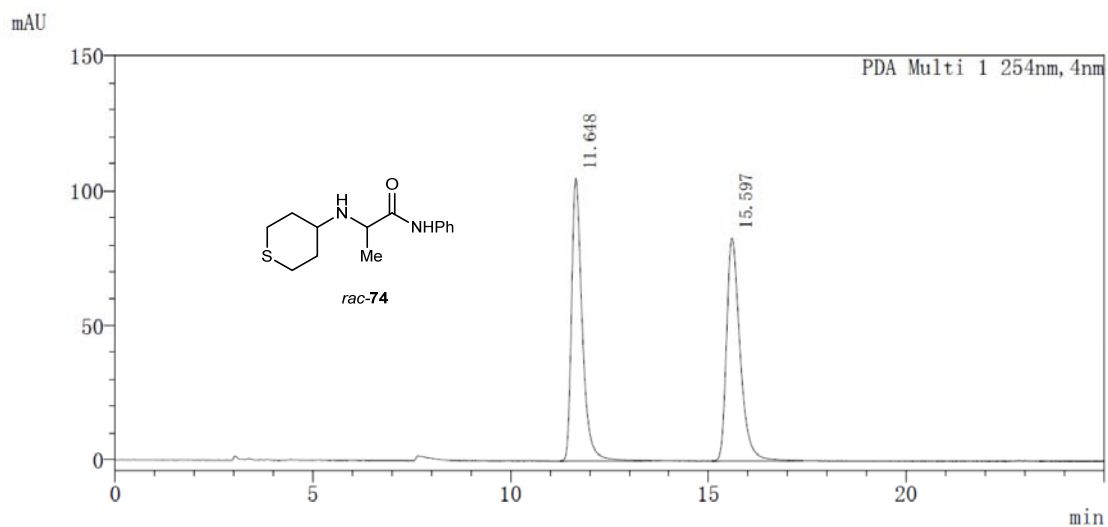

Peak Table

PDA Ch1 254nm

| Peak# | Ret. Time | Area    | Area%  |
|-------|-----------|---------|--------|
| 1     | 11.648    | 1971181 | 50.044 |
| 2     | 15.597    | 1967734 | 49.956 |

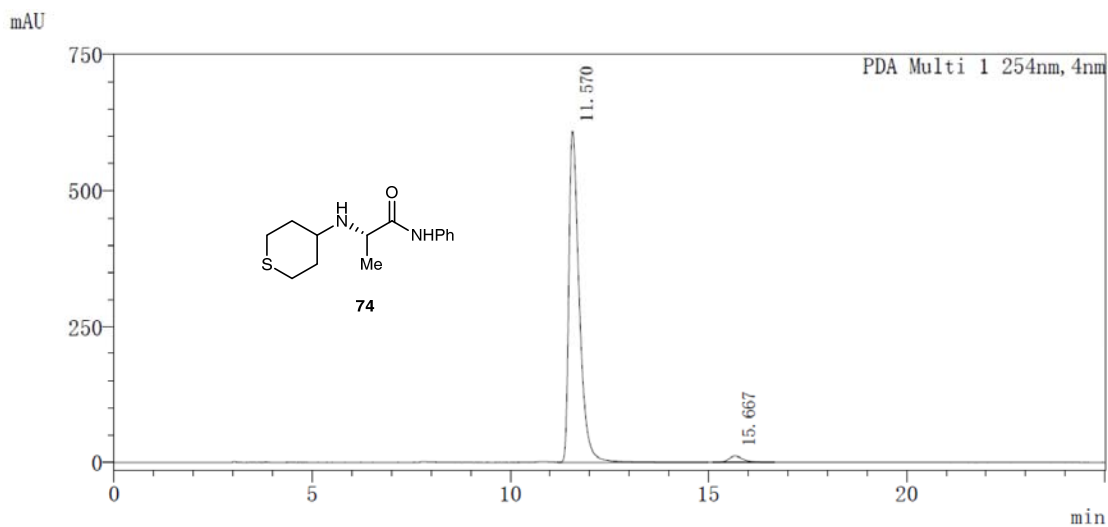

Peak Table

PDA Ch1 254nm

| Peak# | Ret. Time | Area     | Area%  |
|-------|-----------|----------|--------|
| 1     | 11.570    | 11188843 | 97.517 |
| 2     | 15.667    | 284940   | 2.483  |

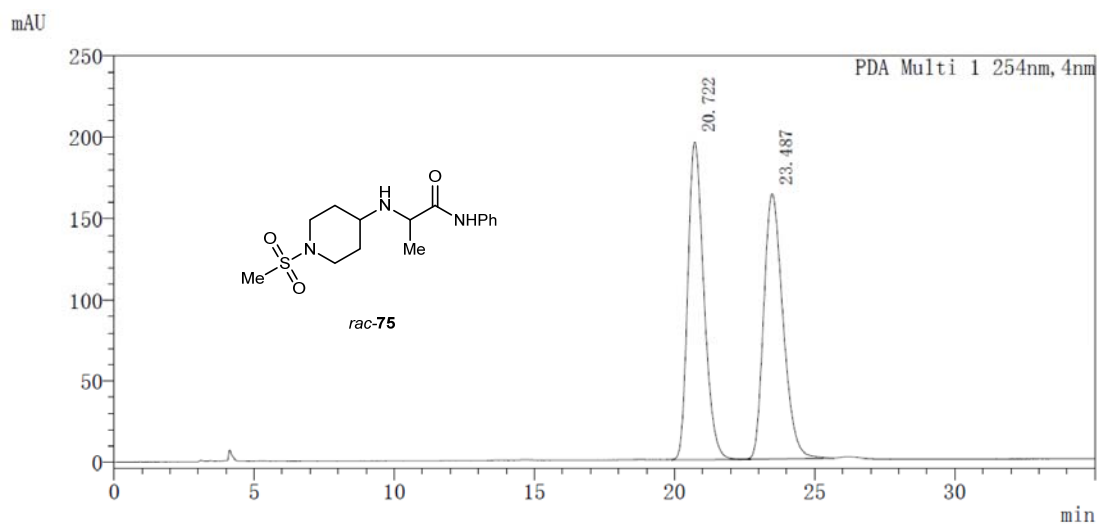

Peak Table

PDA Ch1 254nm

| Peak# | Ret. Time | Area    | Area%  |
|-------|-----------|---------|--------|
| 1     | 20.722    | 7806774 | 49.988 |
| 2     | 23.487    | 7810452 | 50.012 |

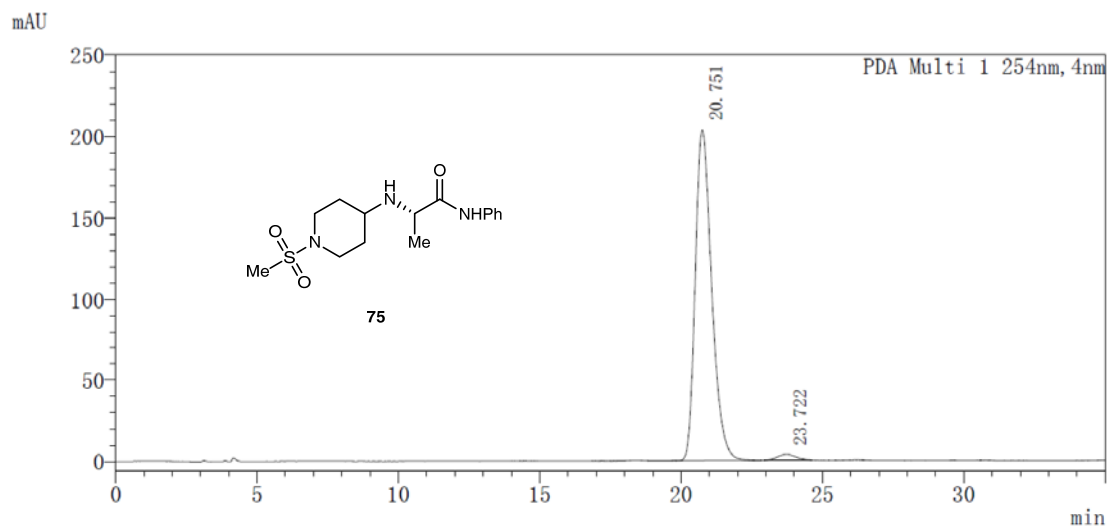

Peak Table

PDA Ch1 254nm

| Peak# | Ret. Time | Area    | Area%  |
|-------|-----------|---------|--------|
| 1     | 20.751    | 8256004 | 97.933 |
| 2     | 23.722    | 174221  | 2.067  |

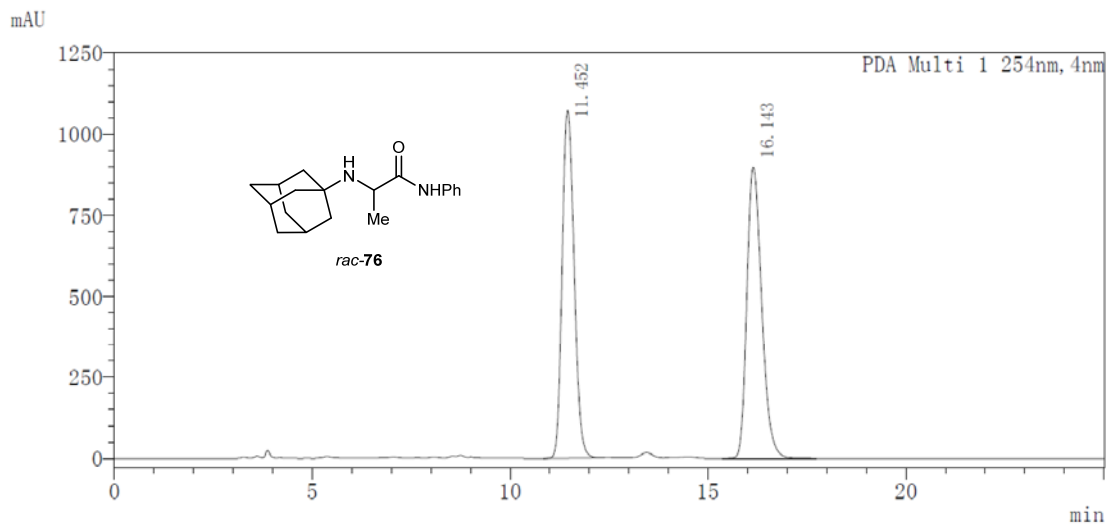

Peak Table

PDA Ch1 254nm

| Peak# | Ret. Time | Area     | Area%  |
|-------|-----------|----------|--------|
| 1     | 11.452    | 22582496 | 49.116 |
| 2     | 16.143    | 23395004 | 50.884 |

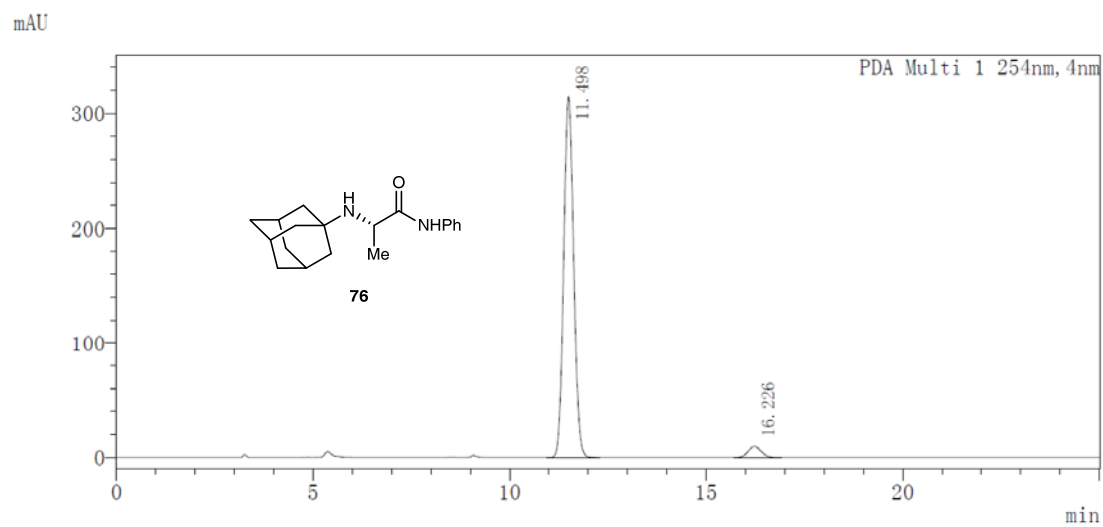

Peak Table

PDA Ch1 254nm

| Peak# | Ret. Time | Area    | Area%  |
|-------|-----------|---------|--------|
| 1     | 11.498    | 5542643 | 96.122 |
| 2     | 16.226    | 223589  | 3.878  |

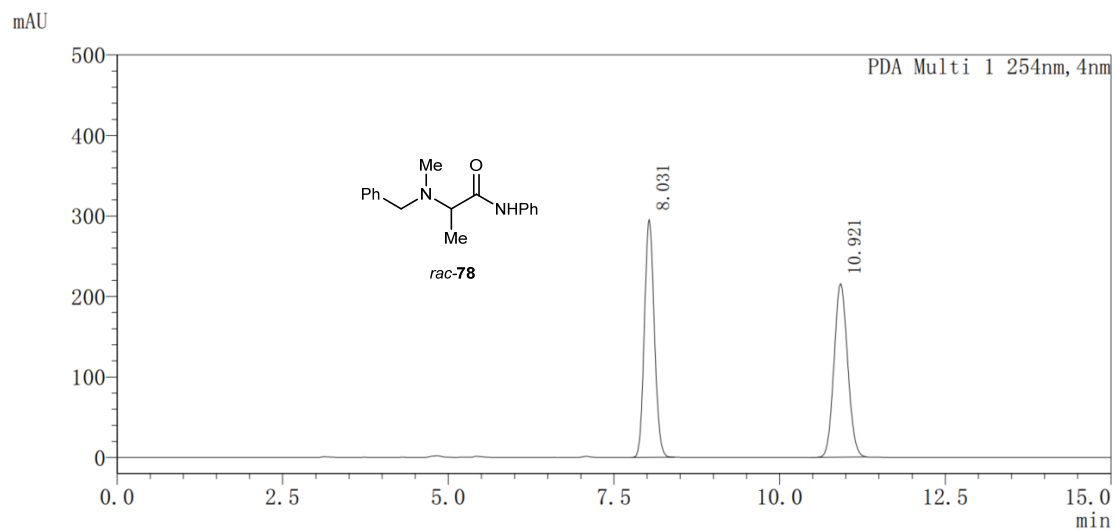

Peak Table

PDA Ch1 254nm

| Peak# | Ret. Time | Area    | Area%  |
|-------|-----------|---------|--------|
| 1     | 8.031     | 3085554 | 50.036 |
| 2     | 10.921    | 3081160 | 49.964 |

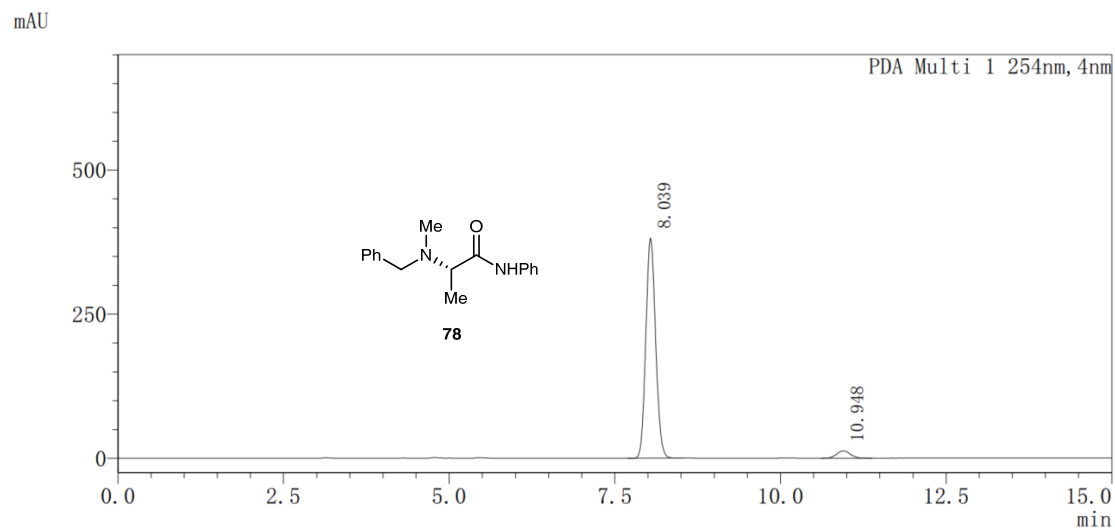

Peak Table

PDA Ch1 254nm

| Peak# | Ret. Time | Area    | Area%  |
|-------|-----------|---------|--------|
| 1     | 8.039     | 3923199 | 95.617 |
| 2     | 10.948    | 179831  | 4.383  |

mAU

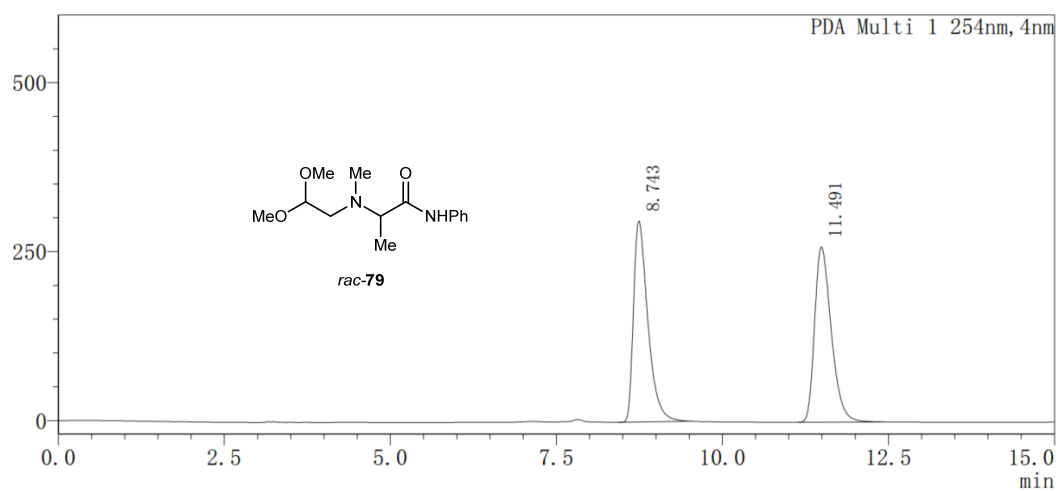

Peak Table

PDA Ch1 254nm

| Peak# | Ret. Time | Area    | Area%  |
|-------|-----------|---------|--------|
| 1     | 8.743     | 4487001 | 49.730 |
| 2     | 11.491    | 4535751 | 50.270 |

mAU

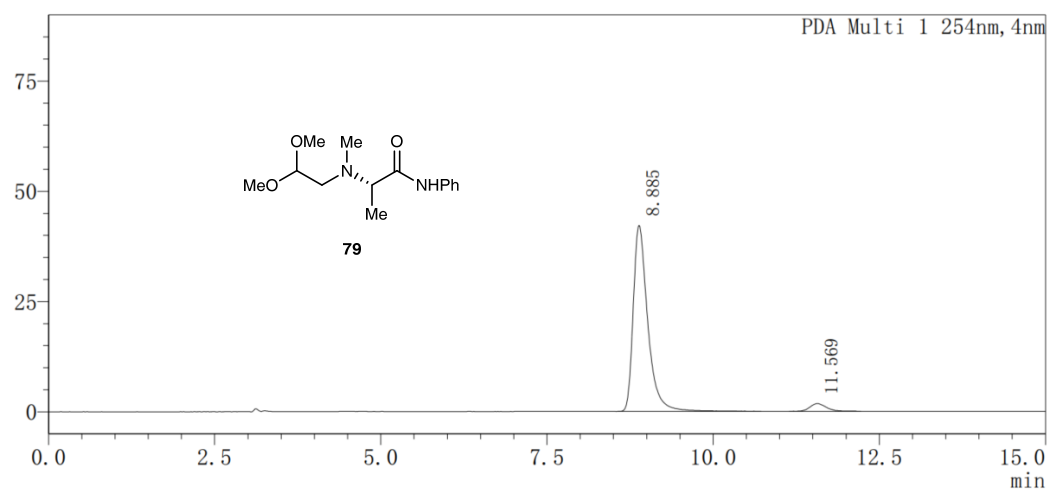

Peak Table

PDA Ch1 254nm

| Peak# | Ret. Time | Area   | Area%  |
|-------|-----------|--------|--------|
| 1     | 8.885     | 641653 | 95.582 |
| 2     | 11.569    | 29660  | 4.418  |

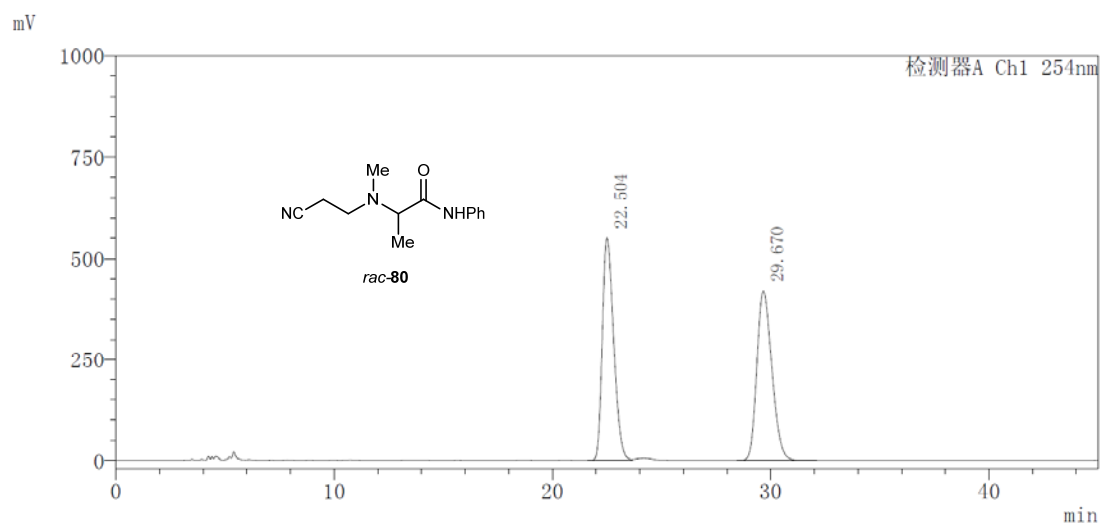

Peak Table

检测器A Ch1 254nm

| Peak# | Ret. Time | Area     | Area%  |
|-------|-----------|----------|--------|
| 1     | 22.504    | 19965279 | 49.921 |
| 2     | 29.670    | 20028165 | 50.079 |

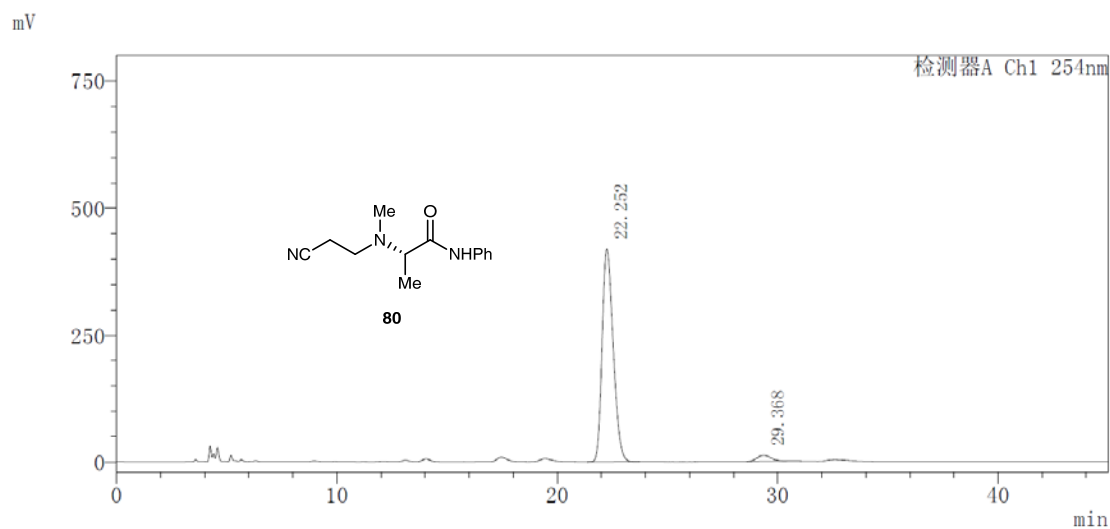

Peak Table

检测器A Ch1 254nm

| Peak# | Ret. Time | Area     | Area%  |
|-------|-----------|----------|--------|
| 1     | 22.252    | 14761863 | 96.500 |
| 2     | 29.368    | 535474   | 3.500  |

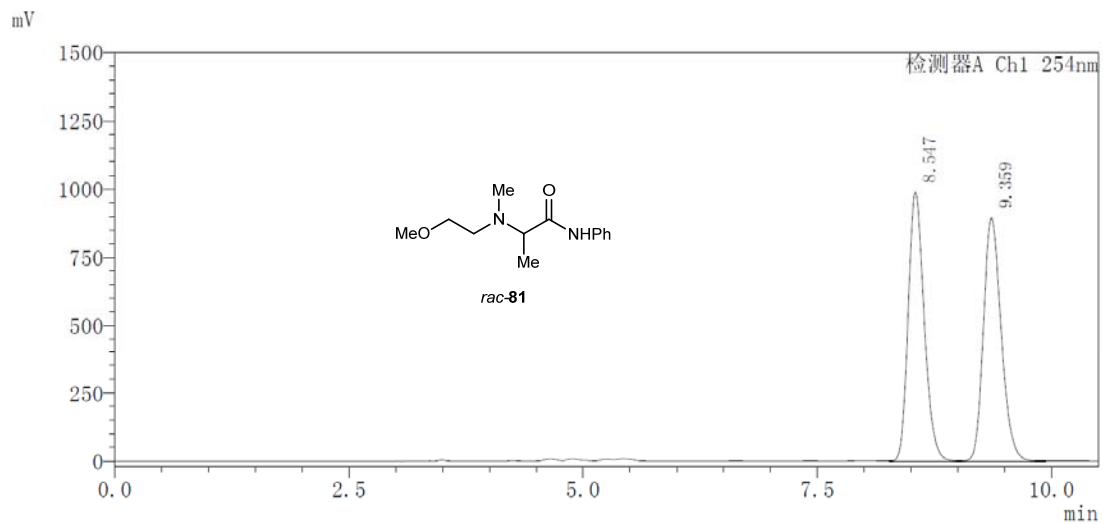

Peak Table

检测器A Ch1 254nm

| Peak# | Ret. Time | Area     | Area%  |
|-------|-----------|----------|--------|
| 1     | 8.547     | 11753416 | 49.824 |
| 2     | 9.359     | 11836688 | 50.176 |

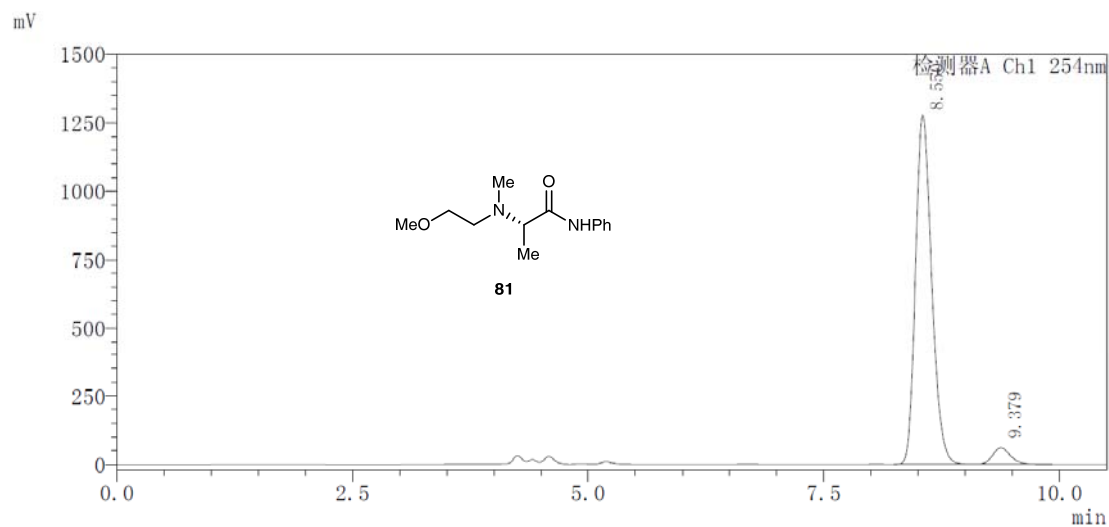

Peak Table

检测器A Ch1 254nm

| Peak# | Ret. Time | Area     | Area%  |
|-------|-----------|----------|--------|
| 1     | 8.550     | 15283323 | 94.985 |
| 2     | 9.379     | 806914   | 5.015  |



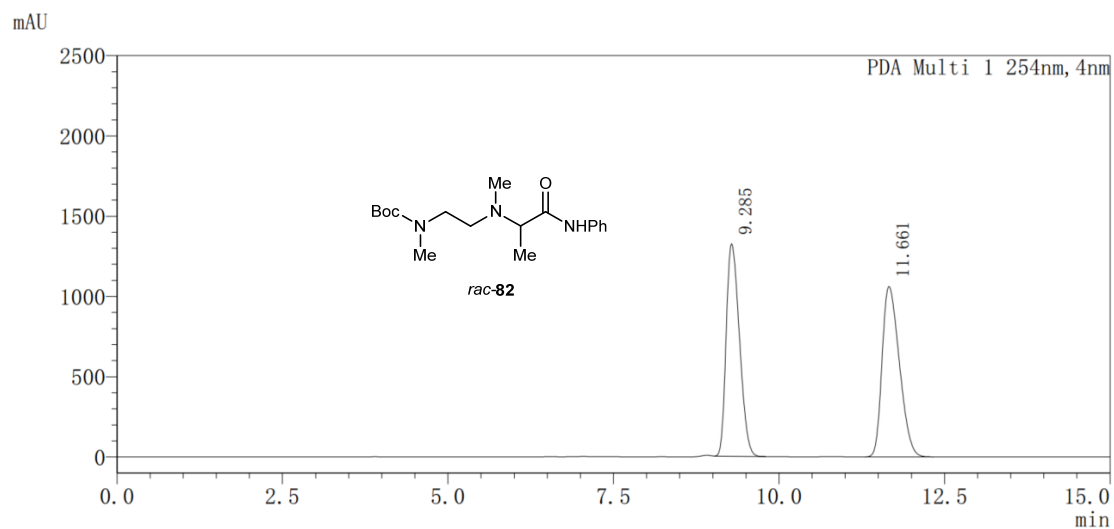

Peak Table

PDA Ch1 254nm

| Peak# | Ret. Time | Area     | Area%  |
|-------|-----------|----------|--------|
| 1     | 9.285     | 18462073 | 48.877 |
| 2     | 11.661    | 19310399 | 51.123 |

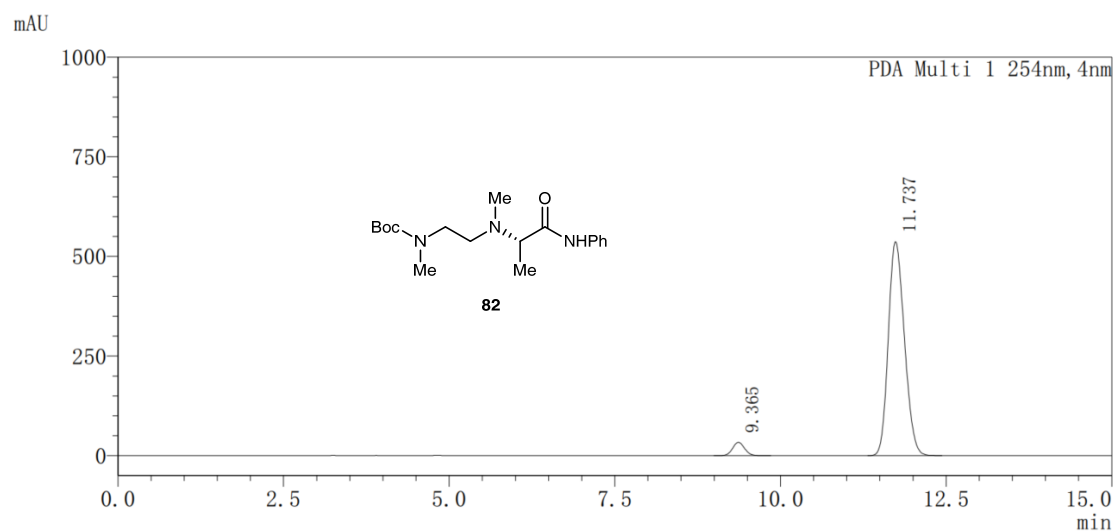

Peak Table

PDA Ch1 254nm

| Peak# | Ret. Time | Area    | Area%  |
|-------|-----------|---------|--------|
| 1     | 9.365     | 416961  | 4.394  |
| 2     | 11.737    | 9072797 | 95.606 |

mV

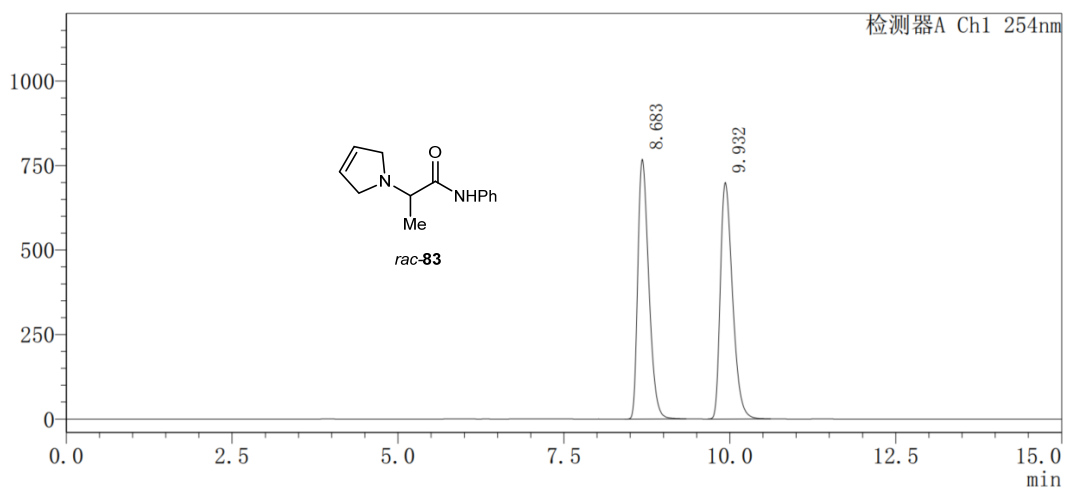

Peak Table

检测器A Ch1 254nm

| Peak# | Ret. Time | Area    | Area%  |
|-------|-----------|---------|--------|
| 1     | 8.683     | 8846574 | 49.707 |
| 2     | 9.932     | 8950750 | 50.293 |

mV

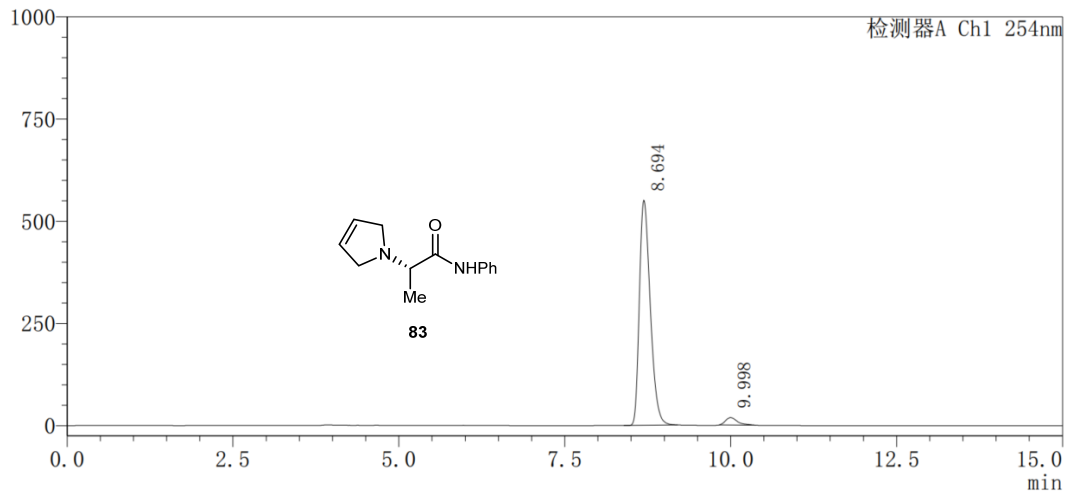

Peak Table

检测器A Ch1 254nm

| Peak# | Ret. Time | Area    | Area%  |
|-------|-----------|---------|--------|
| 1     | 8.694     | 6295302 | 96.463 |
| 2     | 9.998     | 230824  | 3.537  |

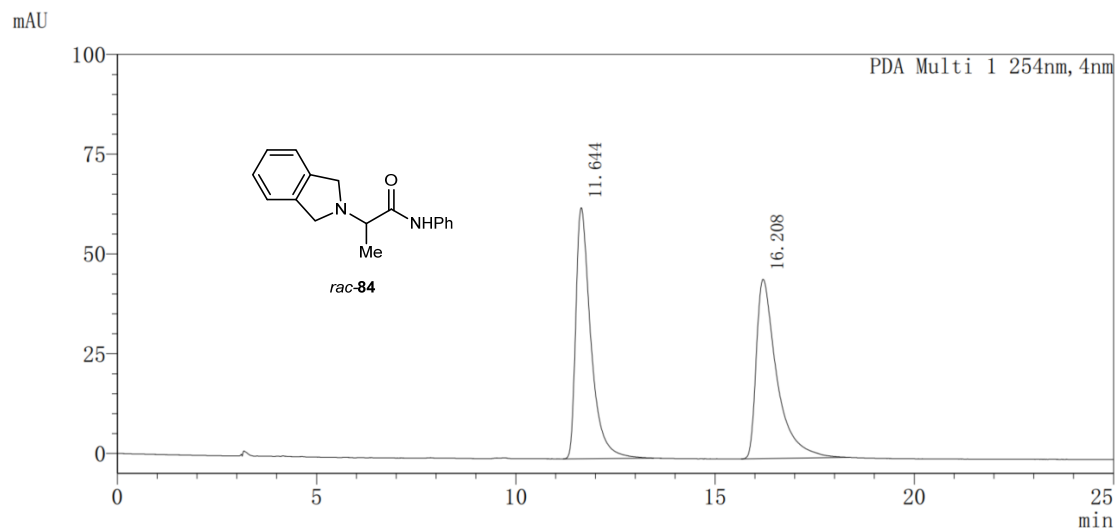

Peak Table

PDA Ch1 254nm

| Peak# | Ret. Time | Area    | Area%  |
|-------|-----------|---------|--------|
| 1     | 11.644    | 1650099 | 50.522 |
| 2     | 16.208    | 1616031 | 49.478 |

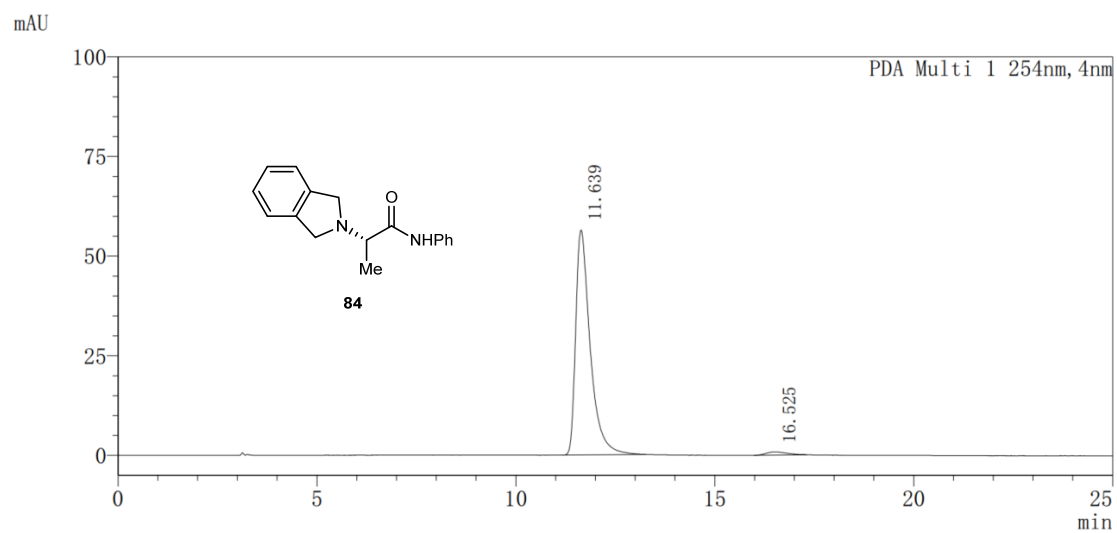

Peak Table

PDA Ch1 254nm

| Peak# | Ret. Time | Area    | Area%  |
|-------|-----------|---------|--------|
| 1     | 11.639    | 1431117 | 98.032 |
| 2     | 16.525    | 28731   | 1.968  |

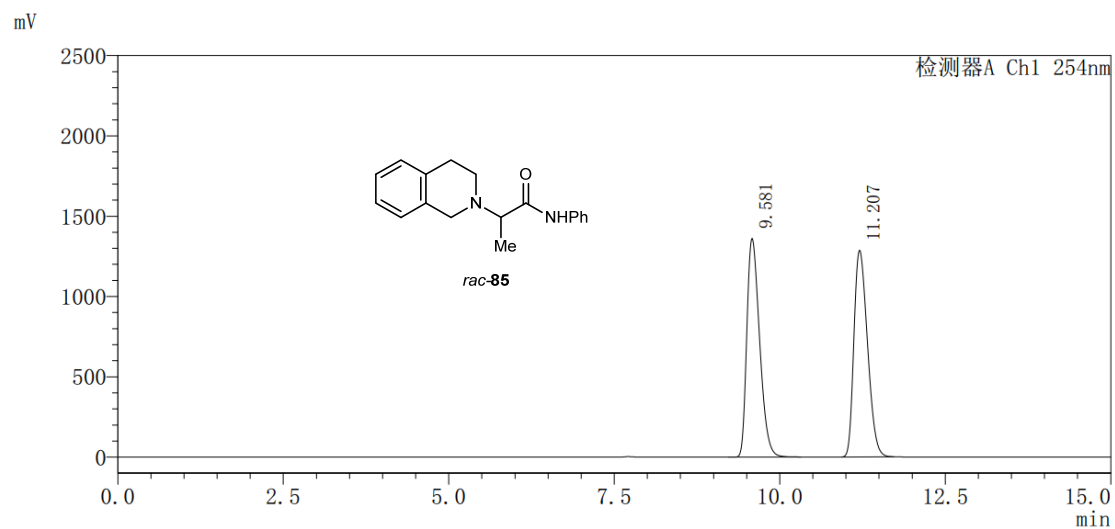

Peak Table

检测器A Ch1 254nm

| Peak# | Ret. Time | Area     | Area%  |
|-------|-----------|----------|--------|
| 1     | 9.581     | 18307666 | 49.998 |
| 2     | 11.207    | 18308837 | 50.002 |

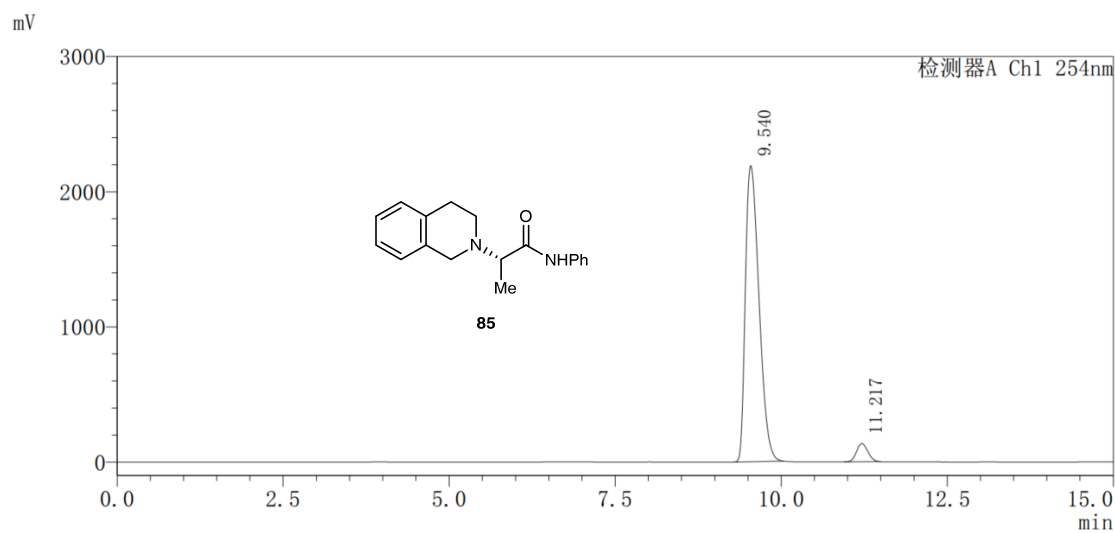

Peak Table

检测器A Ch1 254nm

| Peak# | Ret. Time | Area     | Area%  |
|-------|-----------|----------|--------|
| 1     | 9.540     | 31309836 | 95.045 |
| 2     | 11.217    | 1632219  | 4.955  |

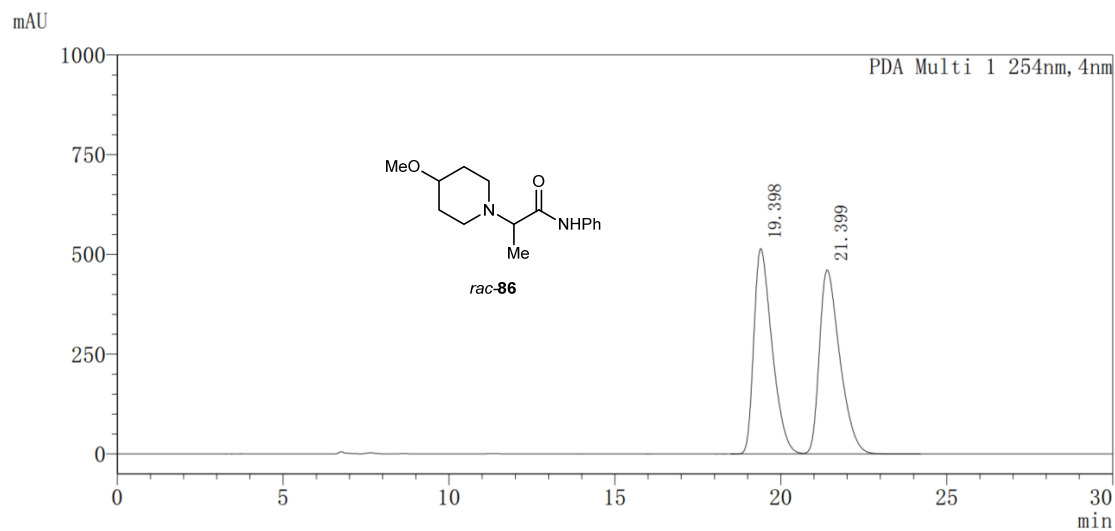

Peak Table

PDA Ch1 254nm

| Peak# | Ret. Time | Area     | Area%  |
|-------|-----------|----------|--------|
| 1     | 19.398    | 19818549 | 49.888 |
| 2     | 21.399    | 19907160 | 50.112 |

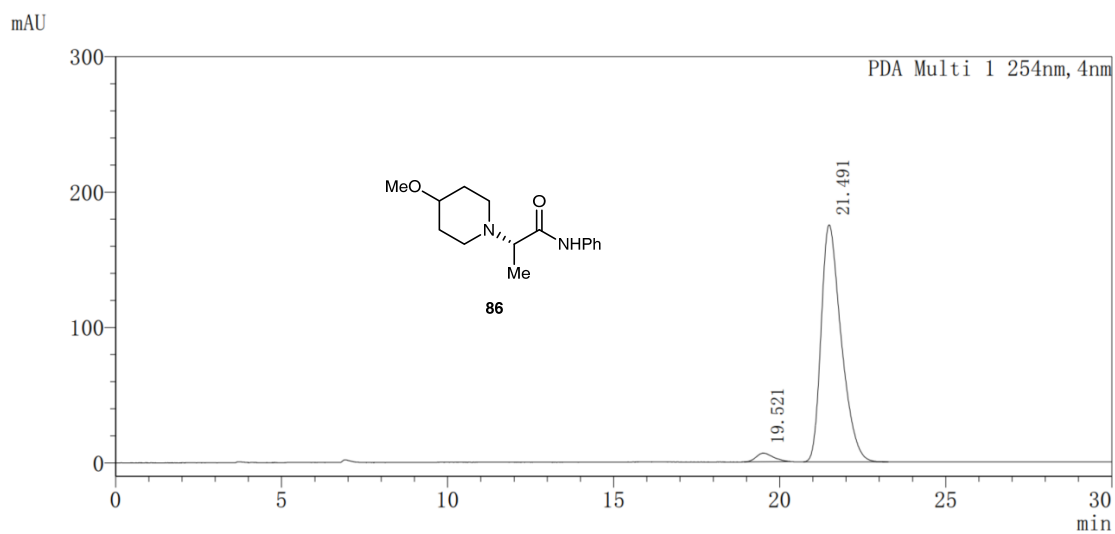

Peak Table

PDA Ch1 254nm

| Peak# | Ret. Time | Area    | Area%  |
|-------|-----------|---------|--------|
| 1     | 19.521    | 229491  | 3.004  |
| 2     | 21.491    | 7410483 | 96.996 |

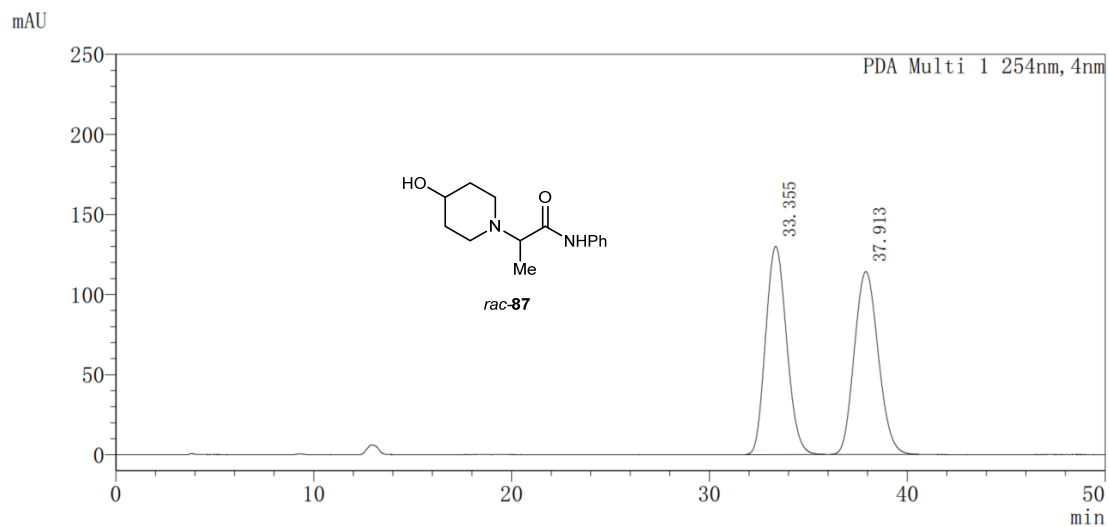

Peak Table

PDA Ch1 254nm

| Peak# | Ret. Time | Area    | Area%  |
|-------|-----------|---------|--------|
| 1     | 33.355    | 9595221 | 50.017 |
| 2     | 37.913    | 9588792 | 49.983 |

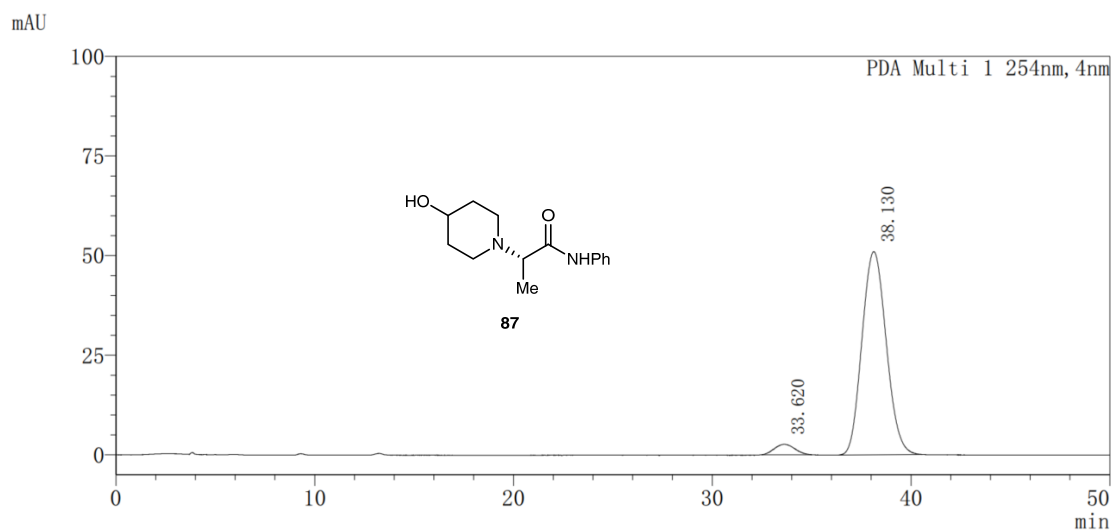

Peak Table

PDA Ch1 254nm

| Peak# | Ret. Time | Area    | Area%  |
|-------|-----------|---------|--------|
| 1     | 33.620    | 184144  | 4.085  |
| 2     | 38.130    | 4324012 | 95.915 |

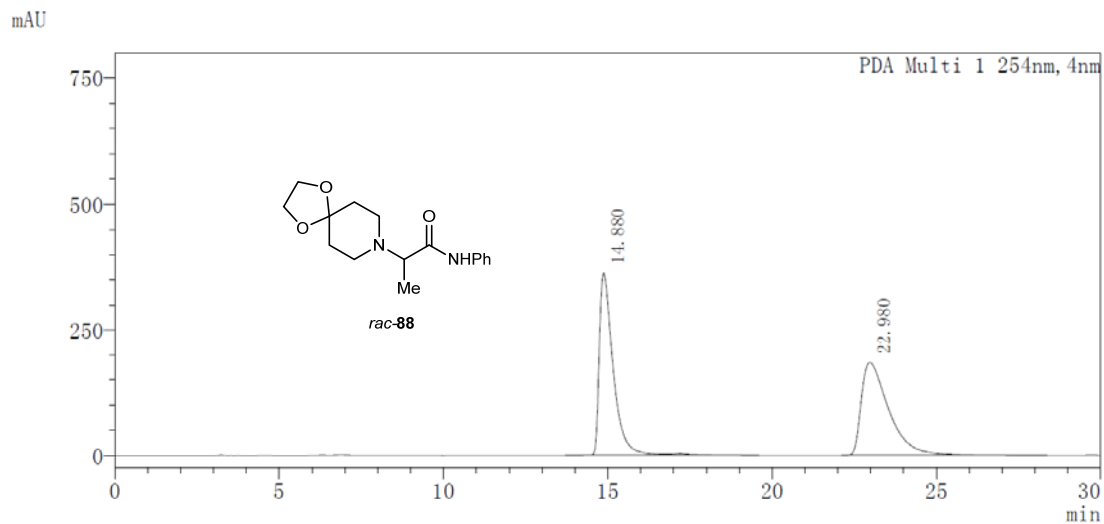

Peak Table

PDA Ch1 254nm

| Peak# | Ret. Time | Area     | Area%  |
|-------|-----------|----------|--------|
| 1     | 14.880    | 10801391 | 50.160 |
| 2     | 22.980    | 10732575 | 49.840 |

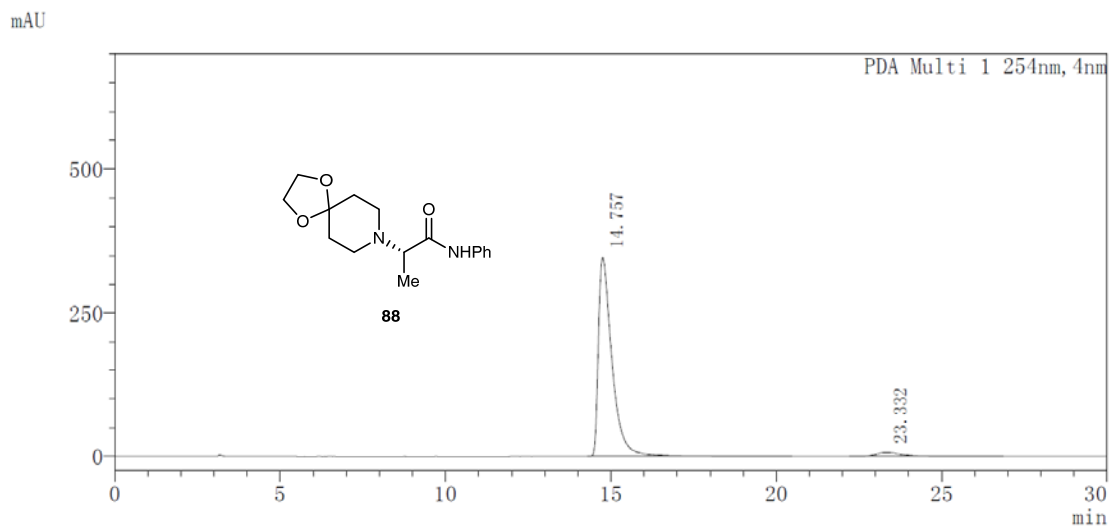

Peak Table

PDA Ch1 254nm

| Peak# | Ret. Time | Area    | Area%  |
|-------|-----------|---------|--------|
| 1     | 14.757    | 9955981 | 96.475 |
| 2     | 23.332    | 363738  | 3.525  |

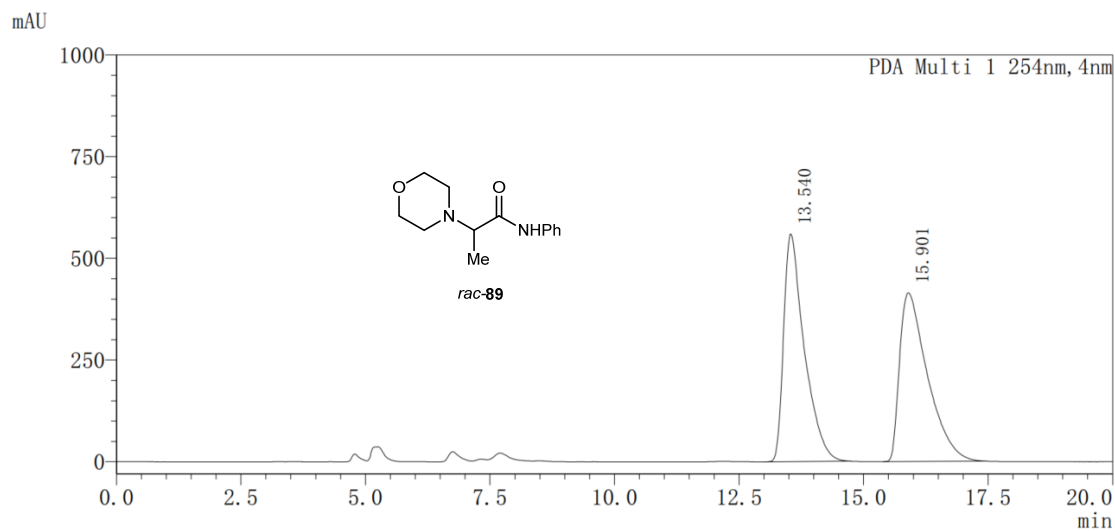

Peak Table

PDA Ch1 254nm

| Peak# | Ret. Time | Area     | Area%  |
|-------|-----------|----------|--------|
| 1     | 13.540    | 16173982 | 49.953 |
| 2     | 15.901    | 16204517 | 50.047 |

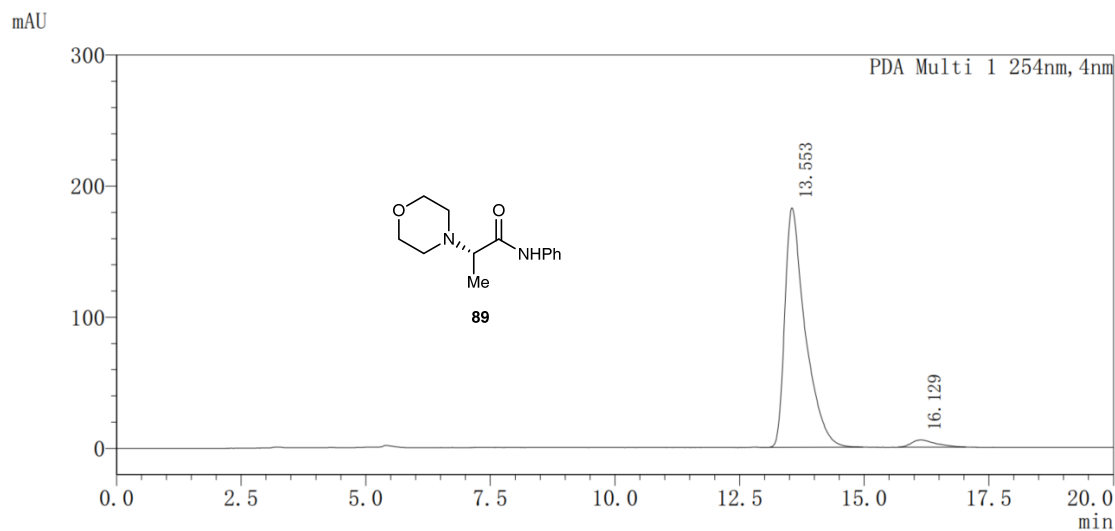

Peak Table

PDA Ch1 254nm

| Peak# | Ret. Time | Area    | Area%  |
|-------|-----------|---------|--------|
| 1     | 13.553    | 5243159 | 96.586 |
| 2     | 16.129    | 185319  | 3.414  |



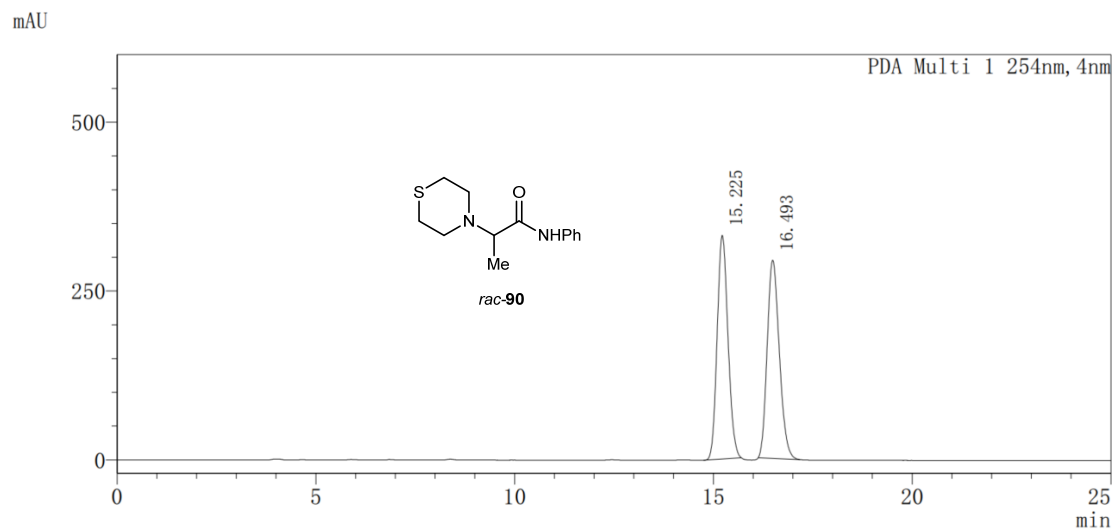

Peak Table

PDA Ch1 254nm

| Peak# | Ret. Time | Area    | Area%  |
|-------|-----------|---------|--------|
| 1     | 15.225    | 6276154 | 50.157 |
| 2     | 16.493    | 6236859 | 49.843 |

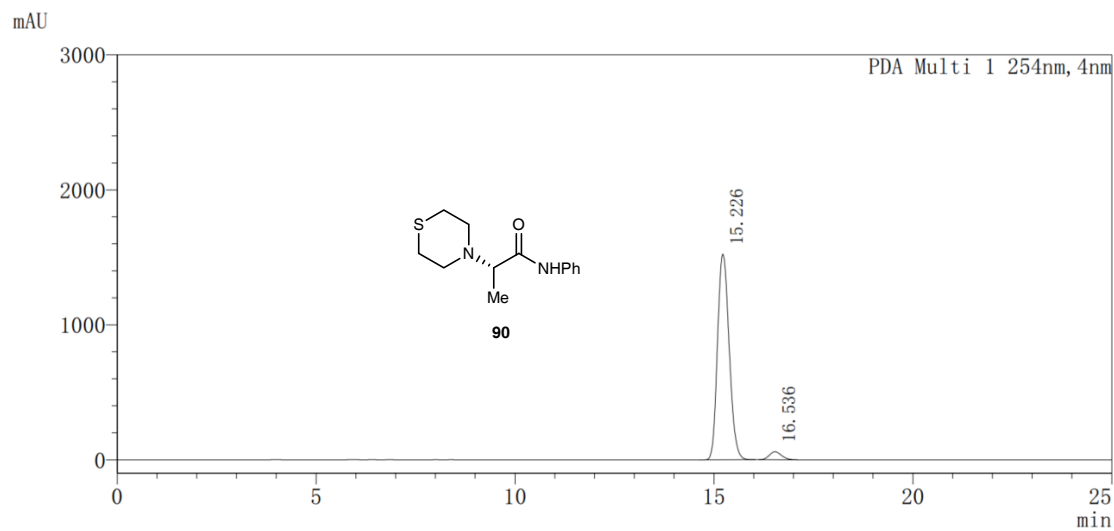

Peak Table

PDA Ch1 254nm

| Peak# | Ret. Time | Area     | Area%  |
|-------|-----------|----------|--------|
| 1     | 15.226    | 31072824 | 96.086 |
| 2     | 16.536    | 1265733  | 3.914  |

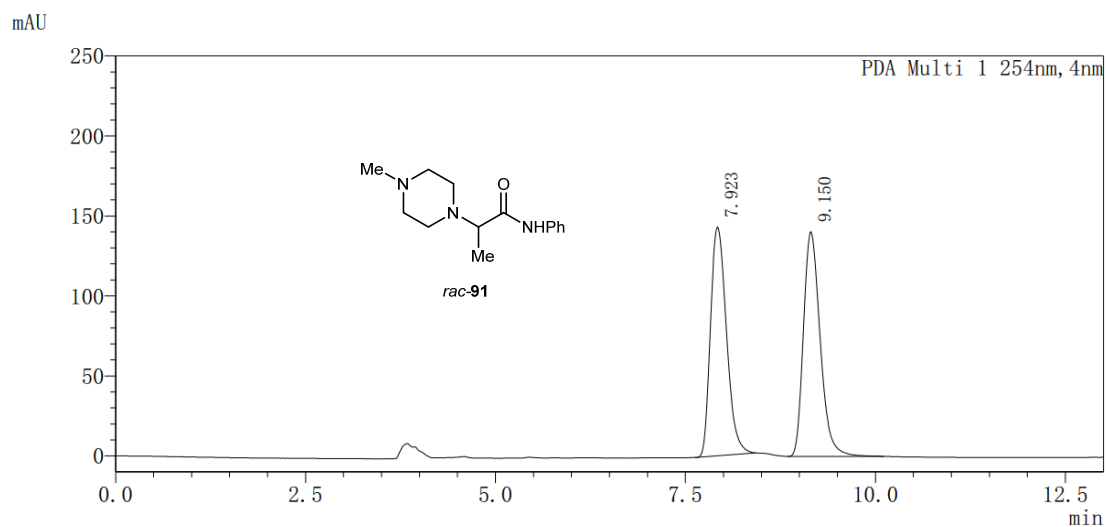

Peak Table

PDA Ch1 254nm

| Peak# | Ret. Time | Area    | Area%  |
|-------|-----------|---------|--------|
| 1     | 7.923     | 2094990 | 49.289 |
| 2     | 9.150     | 2155472 | 50.711 |

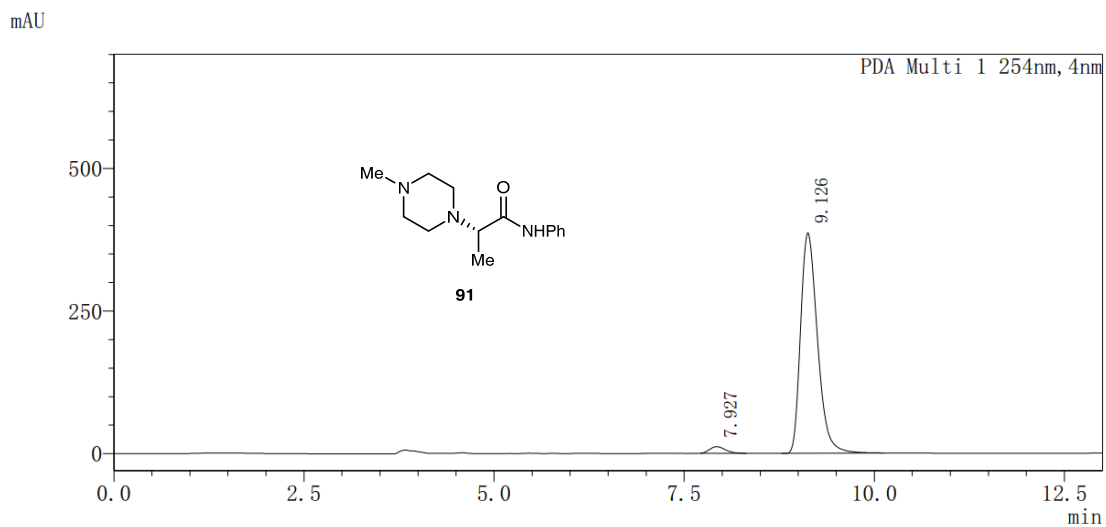

Peak Table

PDA Ch1 254nm

| Peak# | Ret. Time | Area    | Area%  |
|-------|-----------|---------|--------|
| 1     | 7.927     | 165086  | 2.688  |
| 2     | 9.126     | 5976254 | 97.312 |

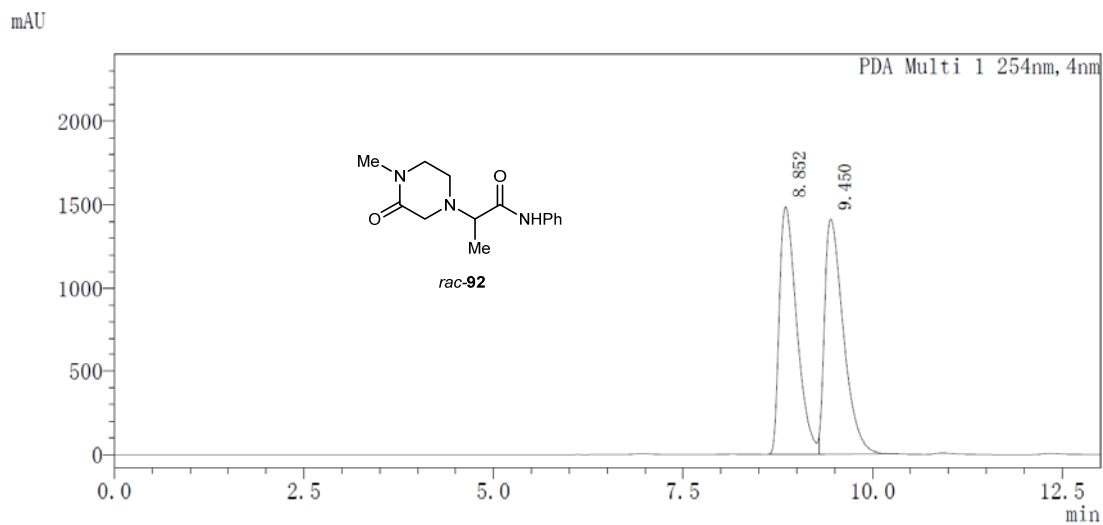

Peak Table

PDA Ch1 254nm

| Peak# | Ret. Time | Area     | Area%  |
|-------|-----------|----------|--------|
| 1     | 8.852     | 23463355 | 49.440 |
| 2     | 9.450     | 23995086 | 50.560 |

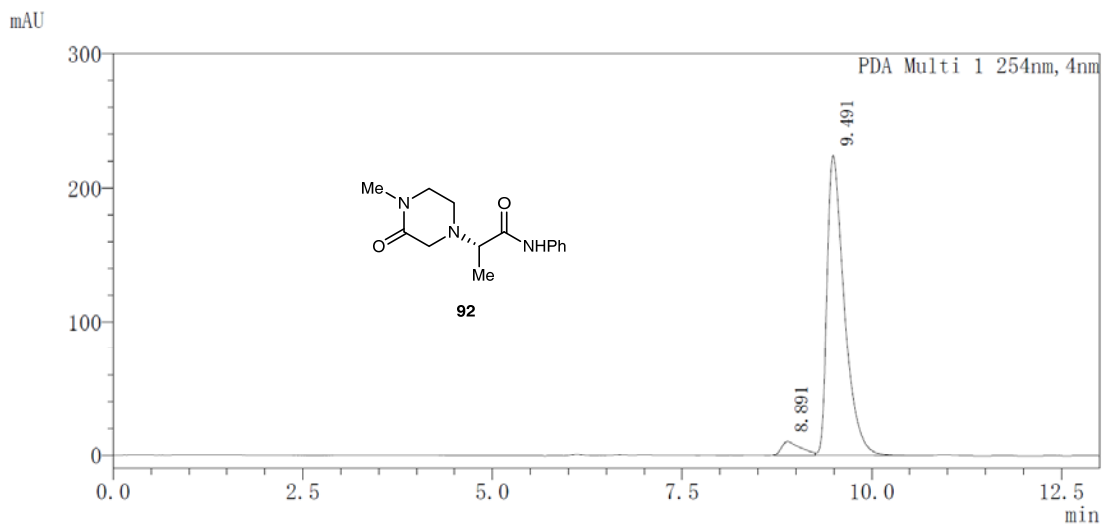

Peak Table

PDA Ch1 254nm

| Peak# | Ret. Time | Area    | Area%  |
|-------|-----------|---------|--------|
| 1     | 8.891     | 176498  | 4.821  |
| 2     | 9.491     | 3484675 | 95.179 |

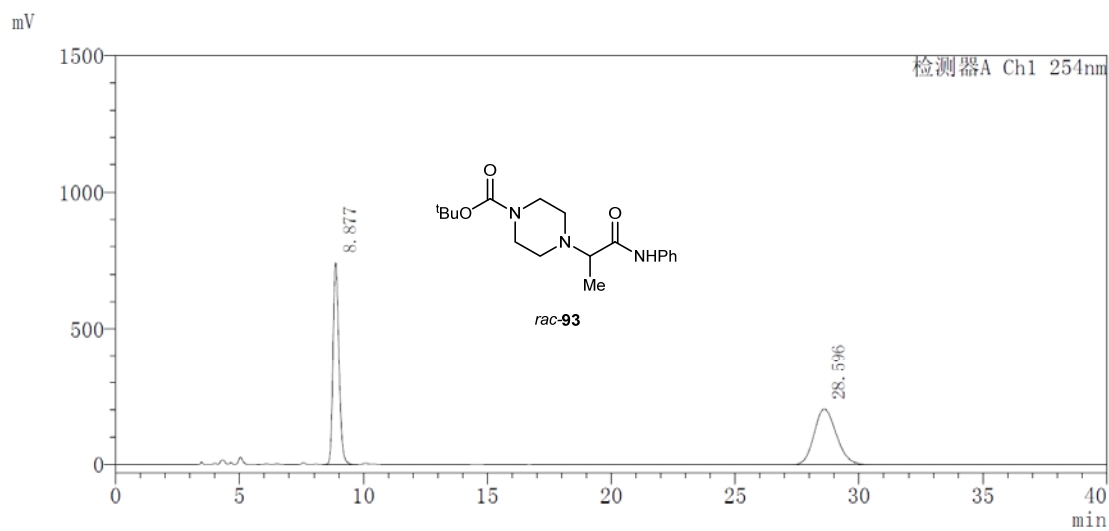

Peak Table

检测器A Ch1 254nm

| Peak# | Ret. Time | Area     | Area%  |
|-------|-----------|----------|--------|
| 1     | 8.877     | 12438915 | 49.743 |
| 2     | 28.596    | 12567415 | 50.257 |

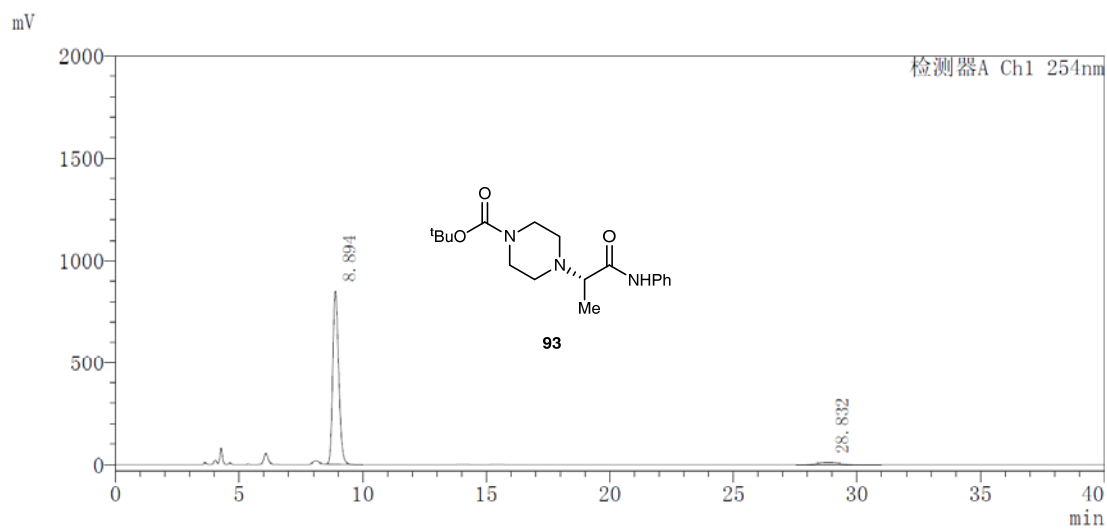

Peak Table

检测器A Ch1 254nm

| Peak# | Ret. Time | Area     | Area%  |
|-------|-----------|----------|--------|
| 1     | 8.894     | 14264299 | 95.928 |
| 2     | 28.832    | 605509   | 4.072  |

mV

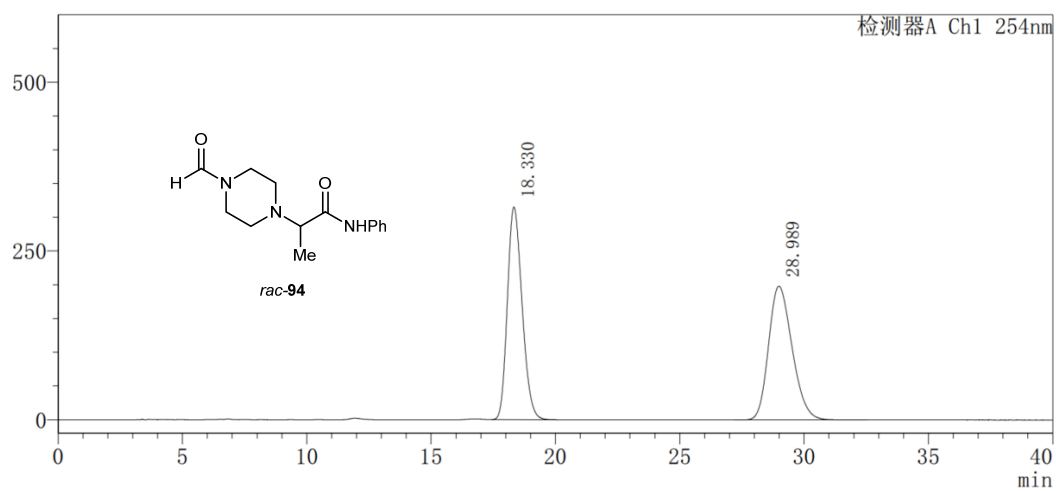

Peak Table

检测器A Ch1 254nm

| Peak# | Ret. Time | Area     | Area%  |
|-------|-----------|----------|--------|
| 1     | 18.330    | 12979518 | 49.837 |
| 2     | 28.989    | 13064186 | 50.163 |

mV

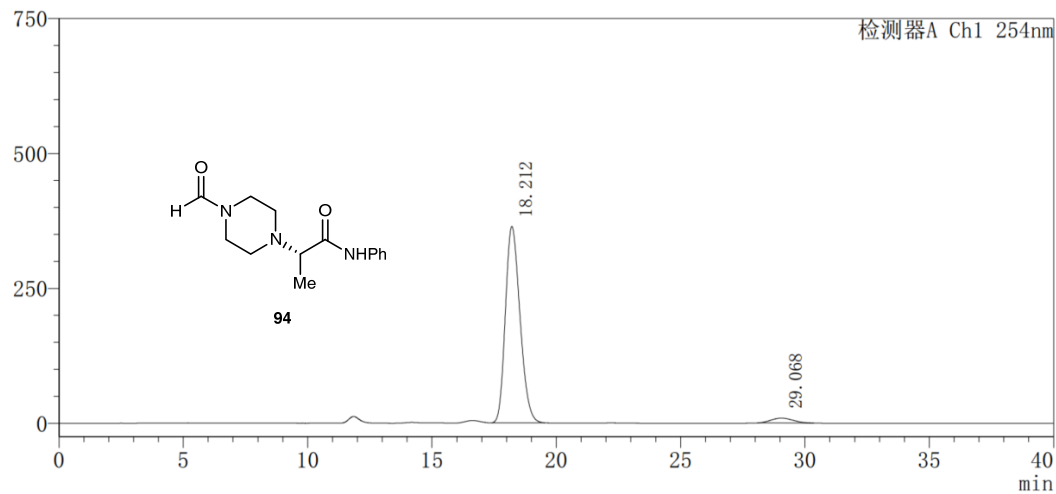

Peak Table

检测器A Ch1 254nm

| Peak# | Ret. Time | Area     | Area%  |
|-------|-----------|----------|--------|
| 1     | 18.212    | 14833675 | 96.357 |
| 2     | 29.068    | 560794   | 3.643  |

mAU

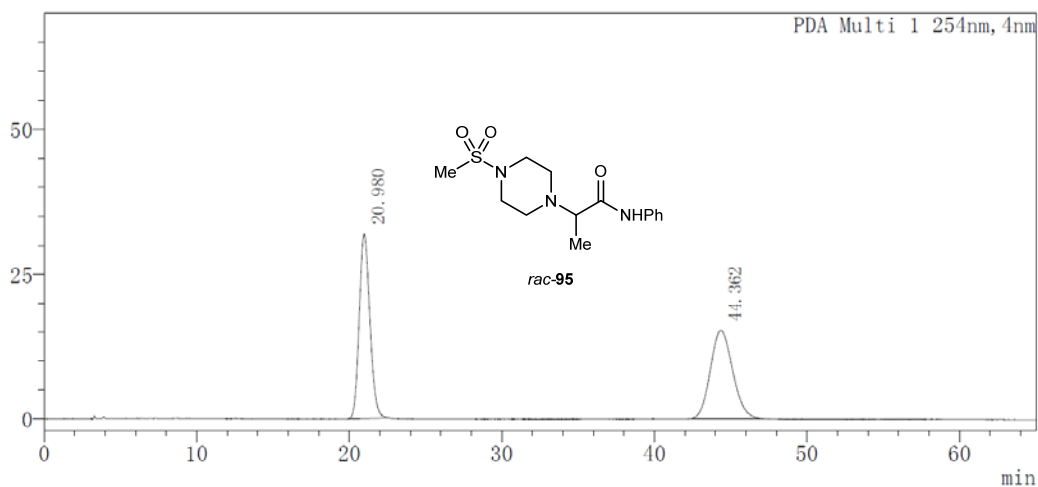

Peak Table

PDA Ch1 254nm

| Peak# | Ret. Time | Area    | Area%  |
|-------|-----------|---------|--------|
| 1     | 20.980    | 1544674 | 50.282 |
| 2     | 44.362    | 1527332 | 49.718 |

mAU

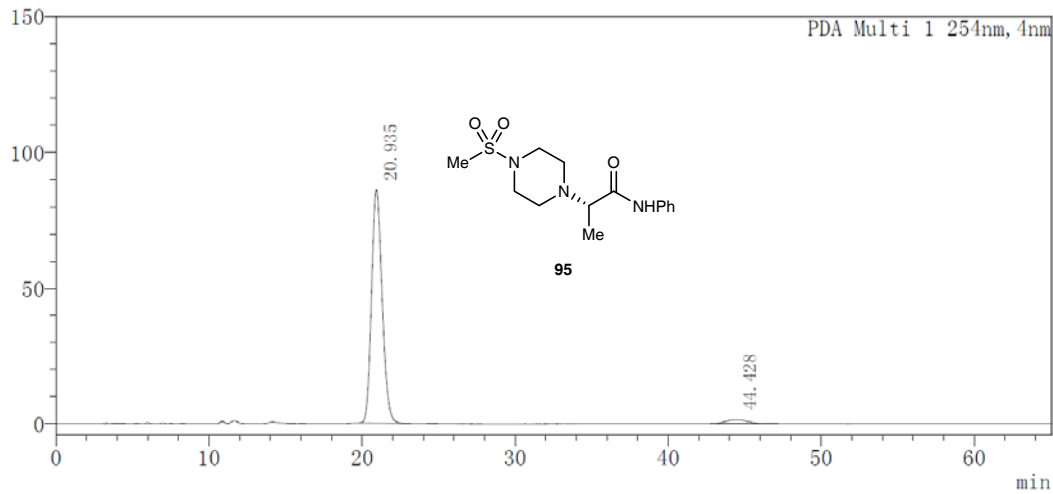

Peak Table

PDA Ch1 254nm

| Peak# | Ret. Time | Area    | Area%  |
|-------|-----------|---------|--------|
| 1     | 20.935    | 4143233 | 96.325 |
| 2     | 44.428    | 158091  | 3.675  |

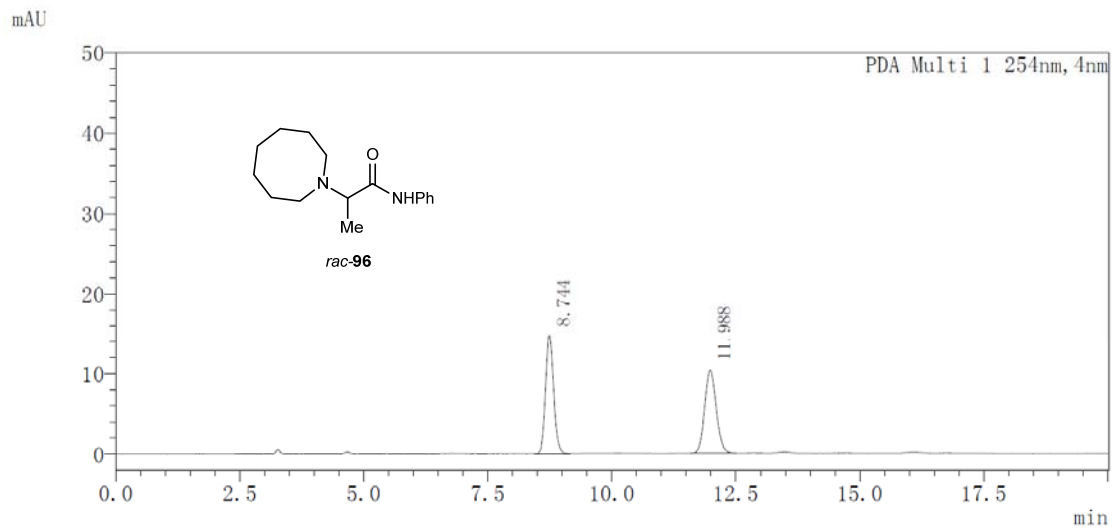

Peak Table

PDA Ch1 254nm

| Peak# | Ret. Time | Area   | Area%  |
|-------|-----------|--------|--------|
| 1     | 8.744     | 167399 | 49.950 |
| 2     | 11.988    | 167736 | 50.050 |

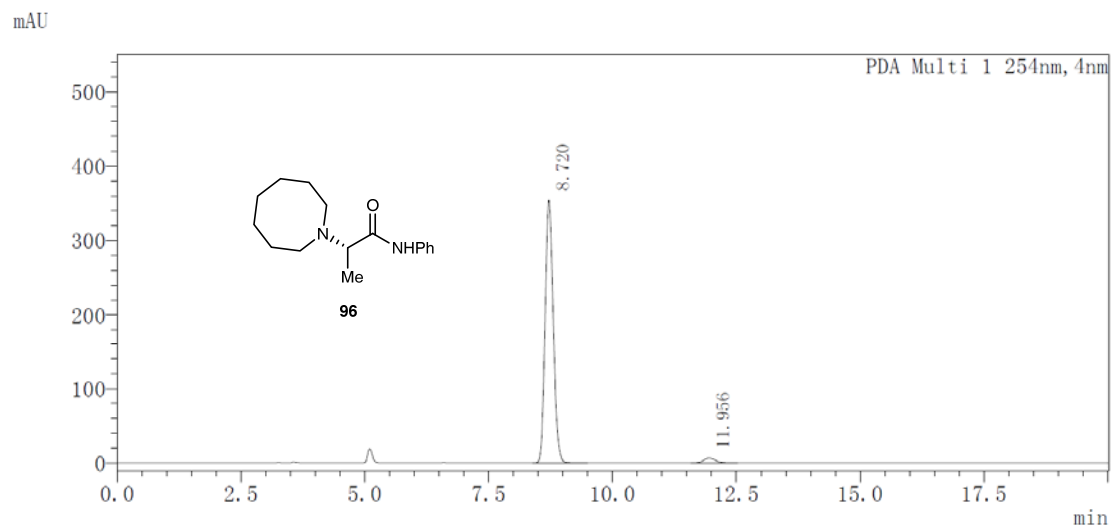

Peak Table

PDA Ch1 254nm

| Peak# | Ret. Time | Area    | Area%  |
|-------|-----------|---------|--------|
| 1     | 8.720     | 4050948 | 97.248 |
| 2     | 11.956    | 114642  | 2.752  |

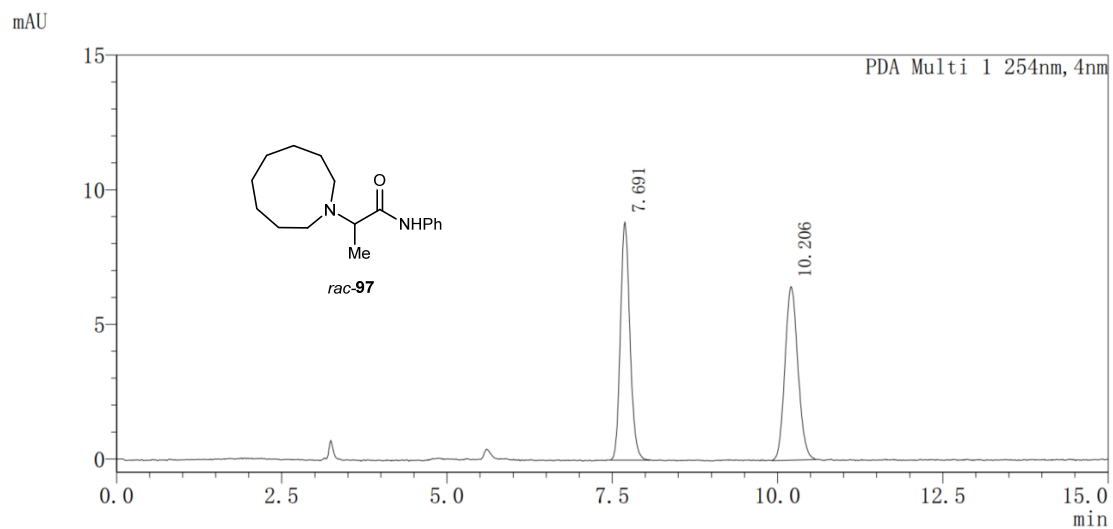

Peak Table

PDA Ch1 254nm

| Peak# | Ret. Time | Area  | Area%  |
|-------|-----------|-------|--------|
| 1     | 7.691     | 88503 | 50.082 |
| 2     | 10.206    | 88214 | 49.918 |

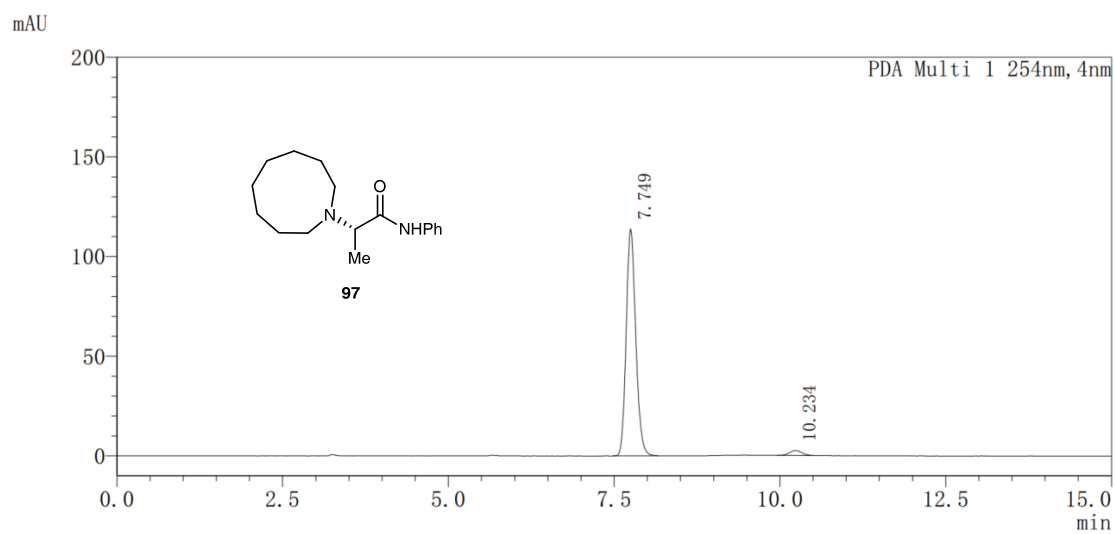

Peak Table

PDA Ch1 254nm

| Peak# | Ret. Time | Area    | Area%  |
|-------|-----------|---------|--------|
| 1     | 7.749     | 1144599 | 97.318 |
| 2     | 10.234    | 31539   | 2.682  |



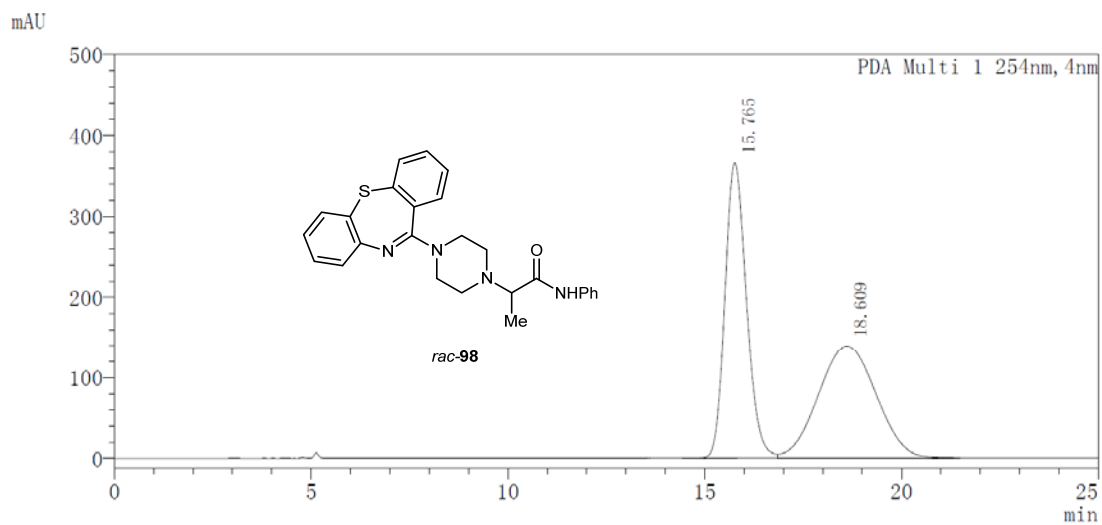

Peak Table

PDA Ch1 254nm

| Peak# | Ret. Time | Area     | Area%  |
|-------|-----------|----------|--------|
| 1     | 15.765    | 13925837 | 49.675 |
| 2     | 18.609    | 14108315 | 50.325 |

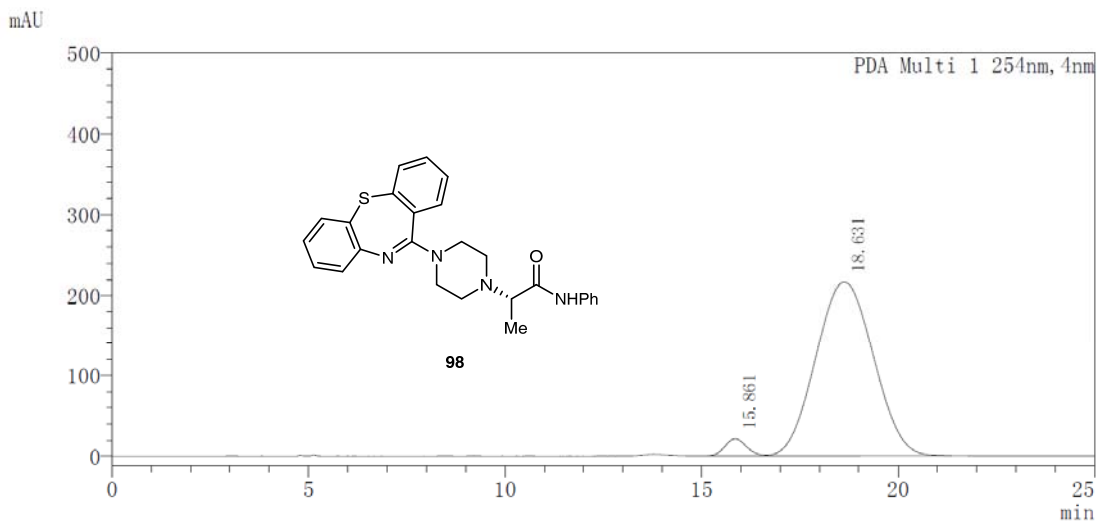

Peak Table

PDA Ch1 254nm

| Peak# | Ret. Time | Area     | Area%  |
|-------|-----------|----------|--------|
| 1     | 15.861    | 826275   | 3.620  |
| 2     | 18.631    | 21995881 | 96.380 |

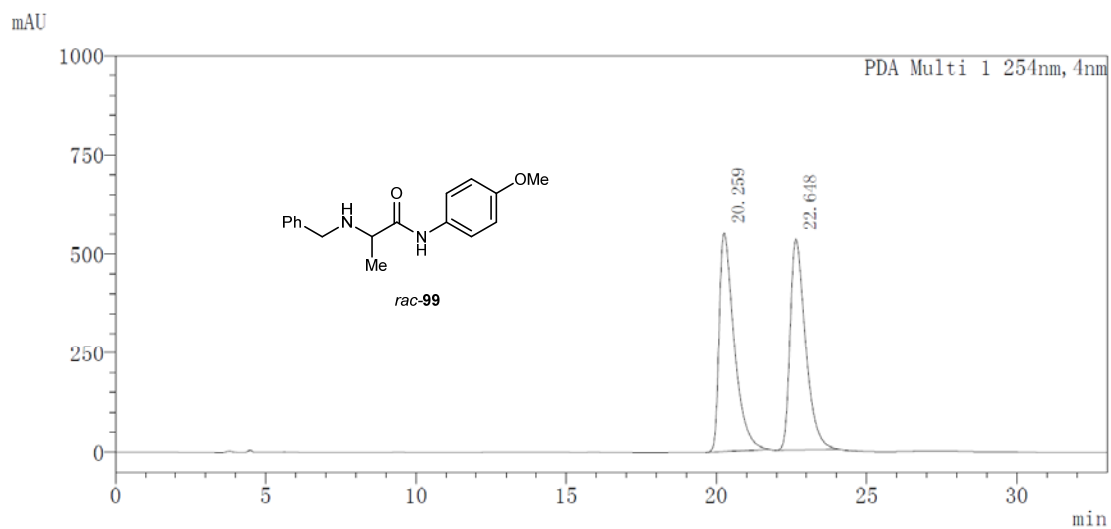

Peak Table

PDA Ch1 254nm

| Peak# | Ret. Time | Area     | Area%  |
|-------|-----------|----------|--------|
| 1     | 20.259    | 19244018 | 50.224 |
| 2     | 22.648    | 19072528 | 49.776 |

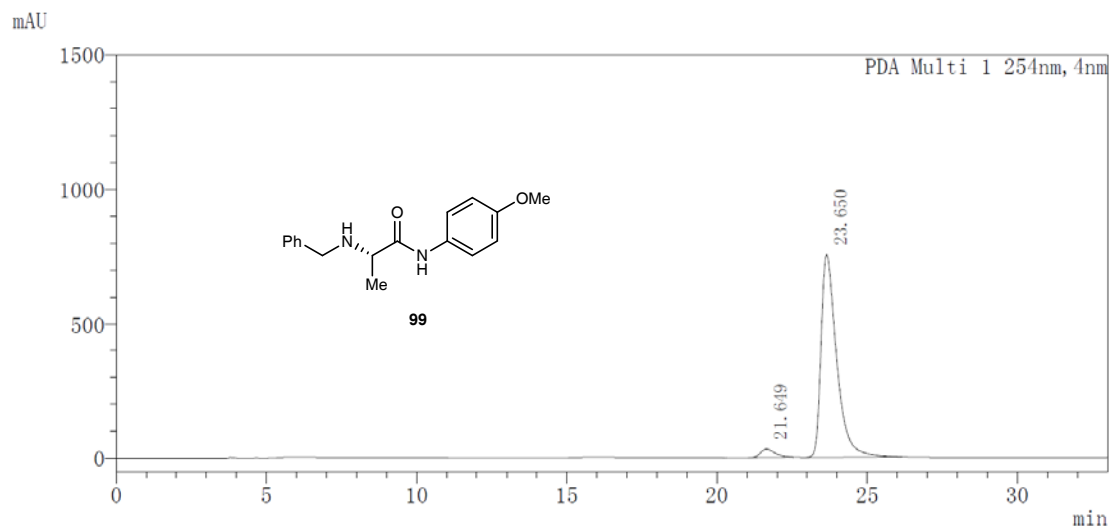

Peak Table

PDA Ch1 254nm

| Peak# | Ret. Time | Area     | Area%  |
|-------|-----------|----------|--------|
| 1     | 21.649    | 1007908  | 3.564  |
| 2     | 23.650    | 27273249 | 96.436 |

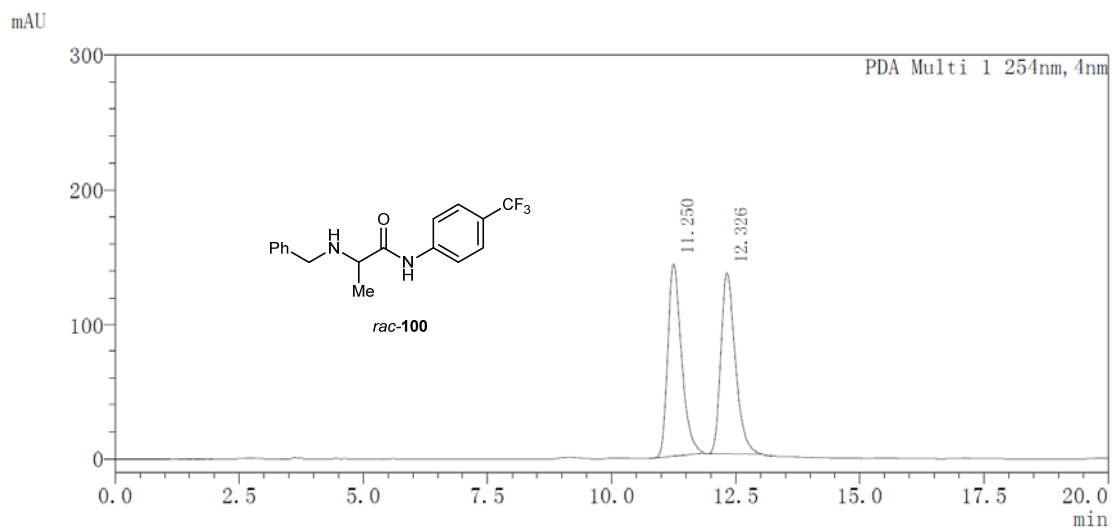

Peak Table

PDA Ch1 254nm

| Peak# | Ret. Time | Area    | Area%  |
|-------|-----------|---------|--------|
| 1     | 11.250    | 2765492 | 50.139 |
| 2     | 12.326    | 2750125 | 49.861 |

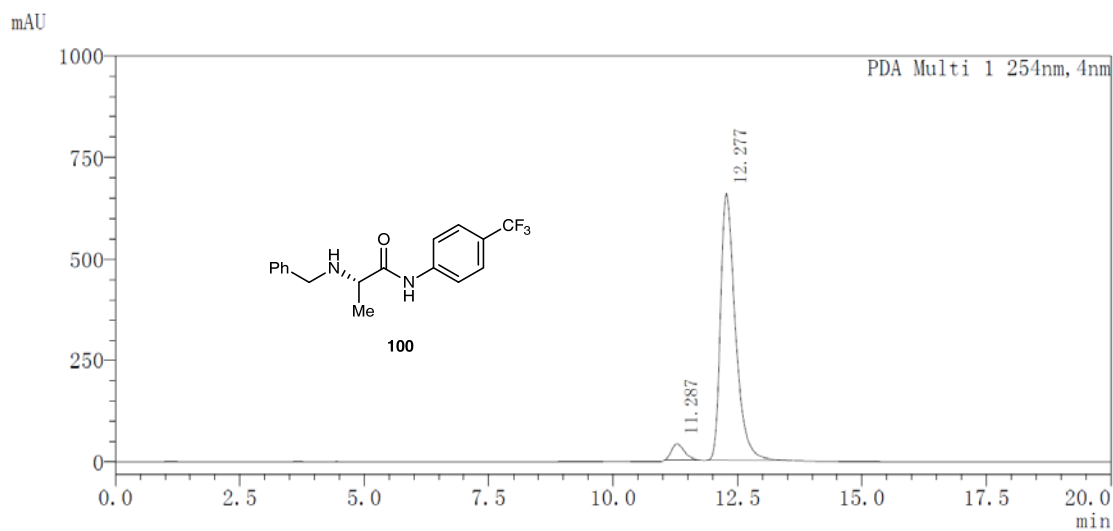

Peak Table

PDA Ch1 254nm

| Peak# | Ret. Time | Area     | Area%  |
|-------|-----------|----------|--------|
| 1     | 11.287    | 731610   | 5.078  |
| 2     | 12.277    | 13675036 | 94.922 |

mAU

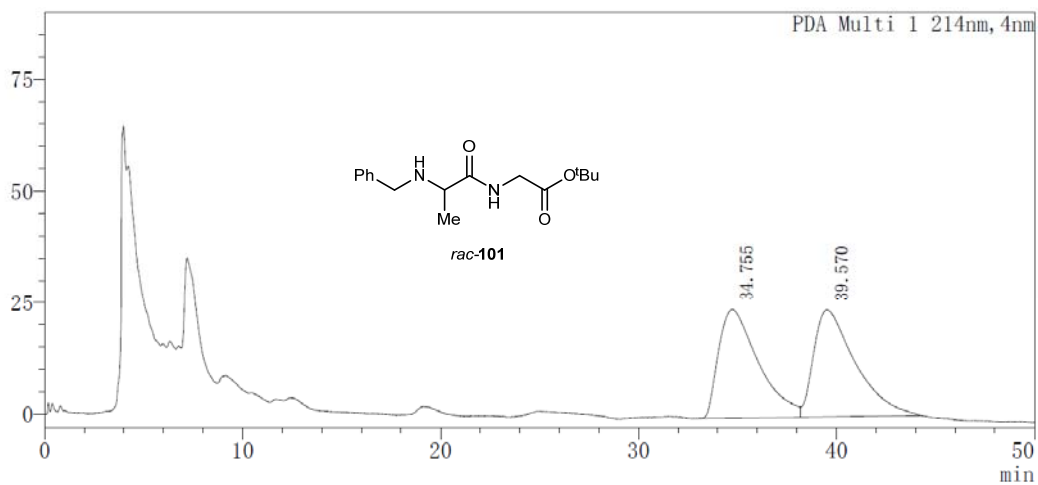

Peak Table

PDA Ch1 214nm

| Peak# | Ret. Time | Area    | Area%  |
|-------|-----------|---------|--------|
| 1     | 34.755    | 3388981 | 49.197 |
| 2     | 39.570    | 3499564 | 50.803 |

mAU

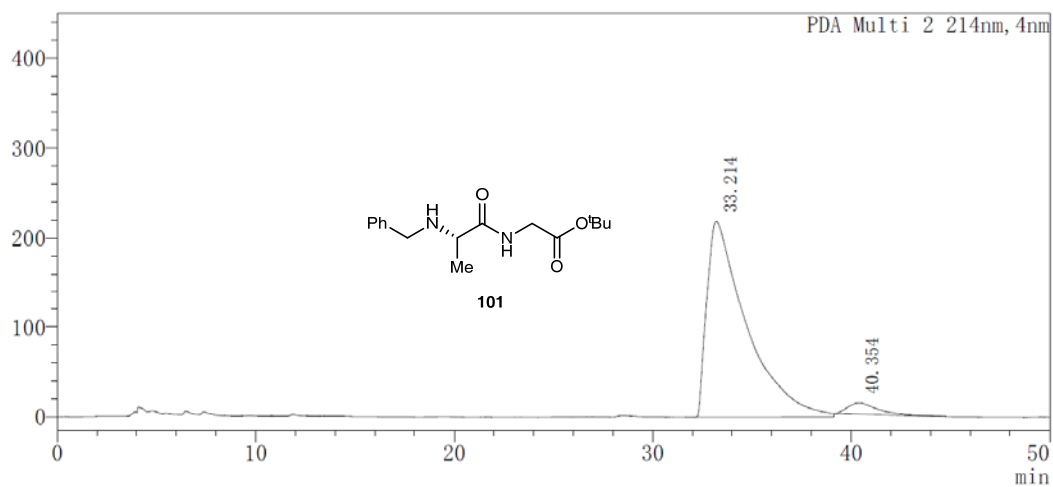

Peak Table

PDA Ch2 214nm

| Peak# | Ret. Time | Area     | Area%  |
|-------|-----------|----------|--------|
| 1     | 33.214    | 30327644 | 95.894 |
| 2     | 40.354    | 1298576  | 4.106  |

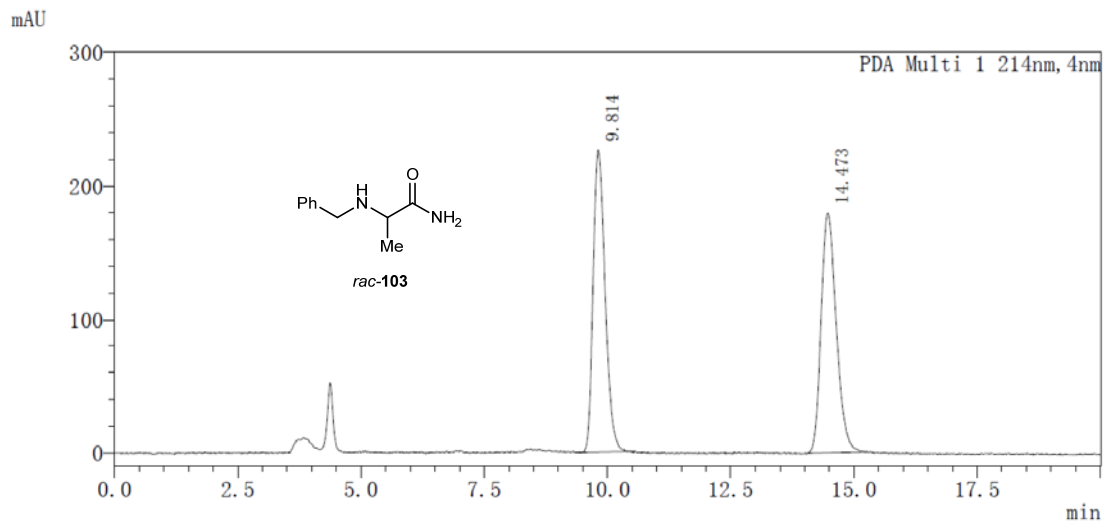

Peak Table

PDA Ch1 214nm

| Peak# | Ret. Time | Area    | Area%  |
|-------|-----------|---------|--------|
| 1     | 9.814     | 3832729 | 49.974 |
| 2     | 14.473    | 3836736 | 50.026 |

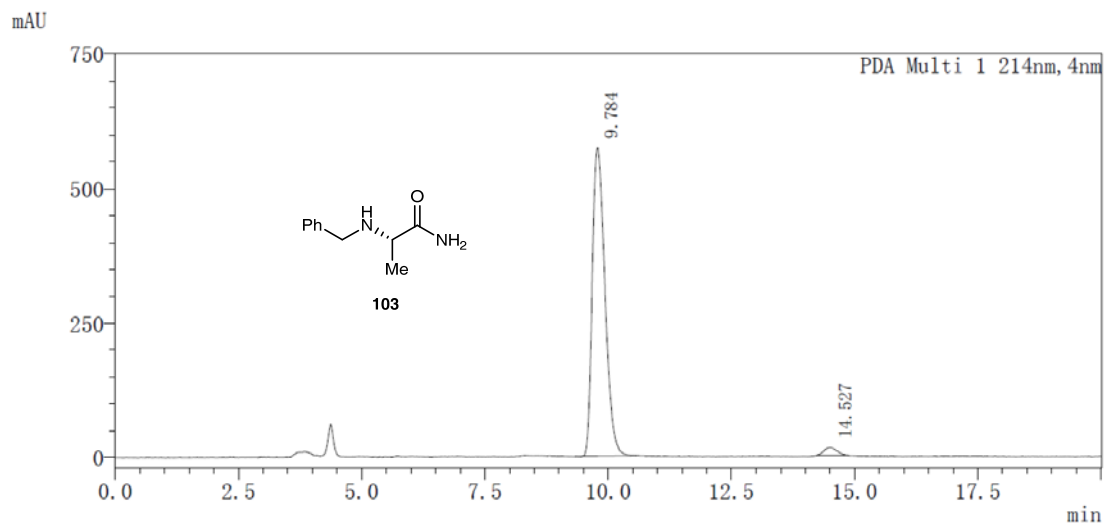

Peak Table

PDA Ch1 214nm

| Peak# | Ret. Time | Area     | Area%  |
|-------|-----------|----------|--------|
| 1     | 9.784     | 10283348 | 97.314 |
| 2     | 14.527    | 283844   | 2.686  |

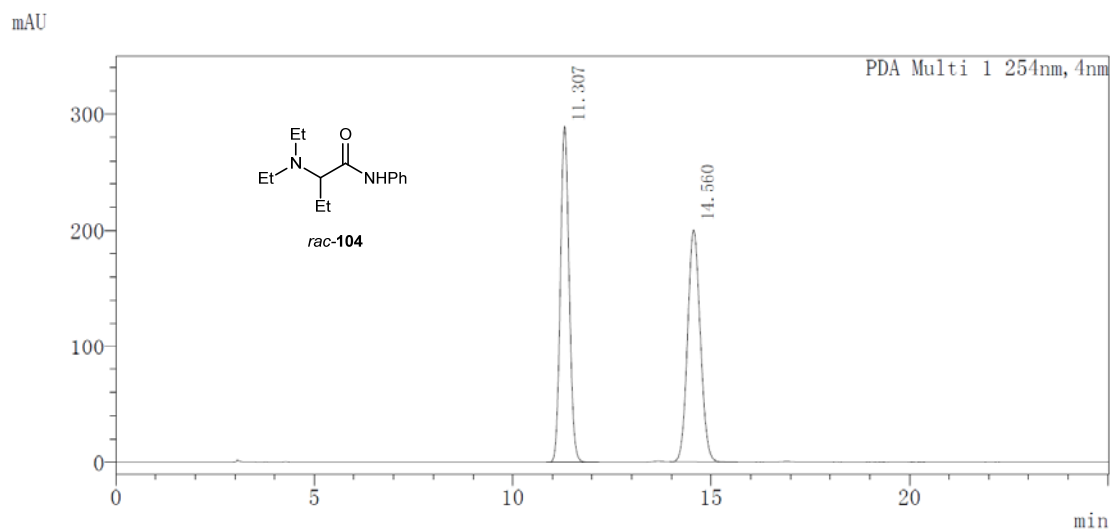

Peak Table

PDA Ch1 254nm

| Peak# | Ret. Time | Area    | Area%  |
|-------|-----------|---------|--------|
| 1     | 11.307    | 4449423 | 49.998 |
| 2     | 14.560    | 4449789 | 50.002 |

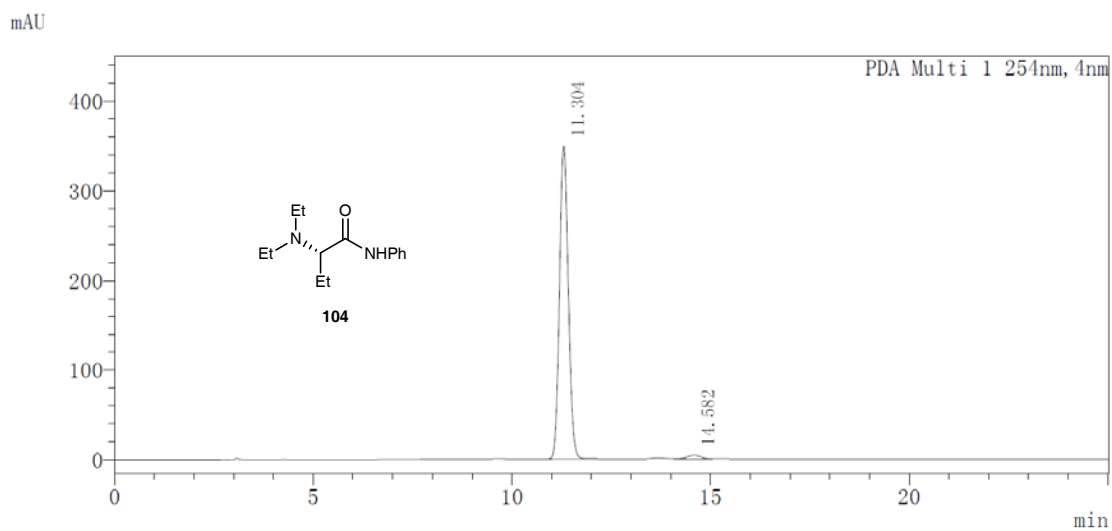

Peak Table

PDA Ch1 254nm

| Peak# | Ret. Time | Area    | Area%  |
|-------|-----------|---------|--------|
| 1     | 11.304    | 5387567 | 98.193 |
| 2     | 14.582    | 99139   | 1.807  |

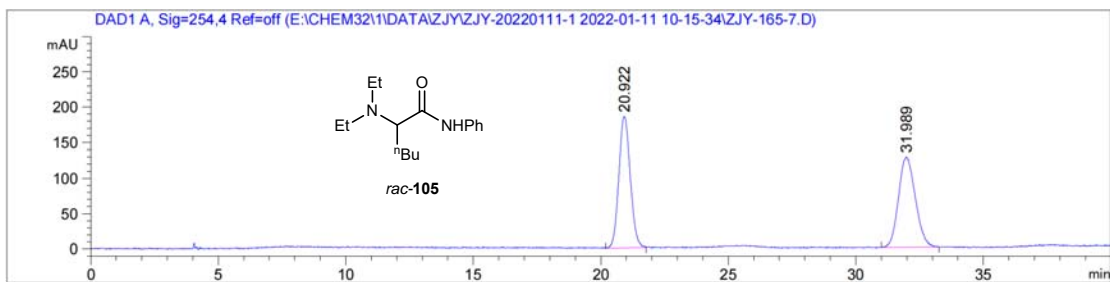

Signal 1: DAD1 A, Sig=254,4 Ref=off

| Peak # | RetTime [min] | Type | Width [min] | Area [mAU*s] | Height [mAU] | Area %  |
|--------|---------------|------|-------------|--------------|--------------|---------|
| 1      | 20.922        | BV R | 0.4596      | 5770.98486   | 185.16542    | 49.5125 |
| 2      | 31.989        | VV R | 0.5554      | 5884.63379   | 127.74808    | 50.4875 |

Totals : 1.16556e4 312.91350

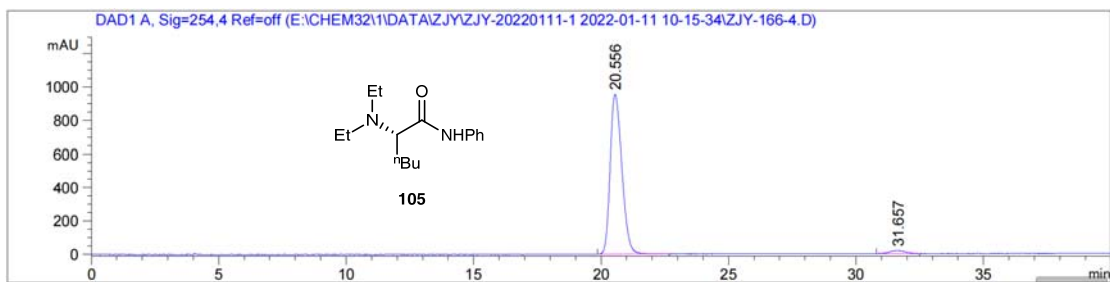

Signal 1: DAD1 A, Sig=254,4 Ref=off

| Peak # | RetTime [min] | Type | Width [min] | Area [mAU*s] | Height [mAU] | Area %  |
|--------|---------------|------|-------------|--------------|--------------|---------|
| 1      | 20.556        | MM R | 0.5320      | 3.04835e4    | 954.95331    | 97.3162 |
| 2      | 31.657        | MM R | 0.7351      | 840.66663    | 19.06111     | 2.6838  |

Totals : 3.13241e4 974.01442

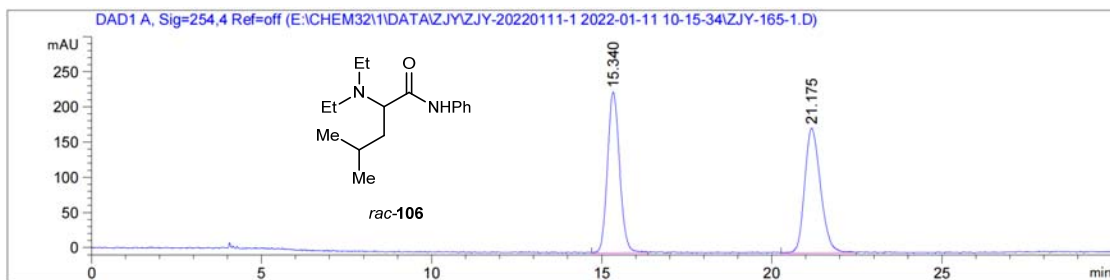

Signal 1: DAD1 A, Sig=254,4 Ref=off

| Peak # | RetTime [min] | Type | Width [min] | Area [mAU*s] | Height [mAU] | Area %  |
|--------|---------------|------|-------------|--------------|--------------|---------|
| 1      | 15.340        | BV R | 0.3685      | 5650.48535   | 228.28624    | 49.7100 |
| 2      | 21.175        | VV R | 0.4521      | 5716.40967   | 177.10173    | 50.2900 |

Totals : 1.13669e4 405.38797

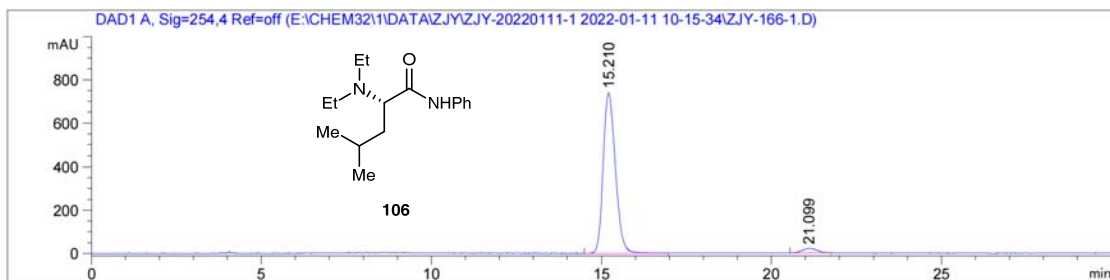

Signal 1: DAD1 A, Sig=254,4 Ref=off

| Peak # | RetTime [min] | Type | Width [min] | Area [mAU*s] | Height [mAU] | Area %  |
|--------|---------------|------|-------------|--------------|--------------|---------|
| 1      | 15.210        | MM R | 0.4151      | 1.84114e4    | 739.19263    | 96.6689 |
| 2      | 21.099        | MM R | 0.5093      | 634.44165    | 20.76370     | 3.3311  |

Totals : 1.90458e4 759.95633



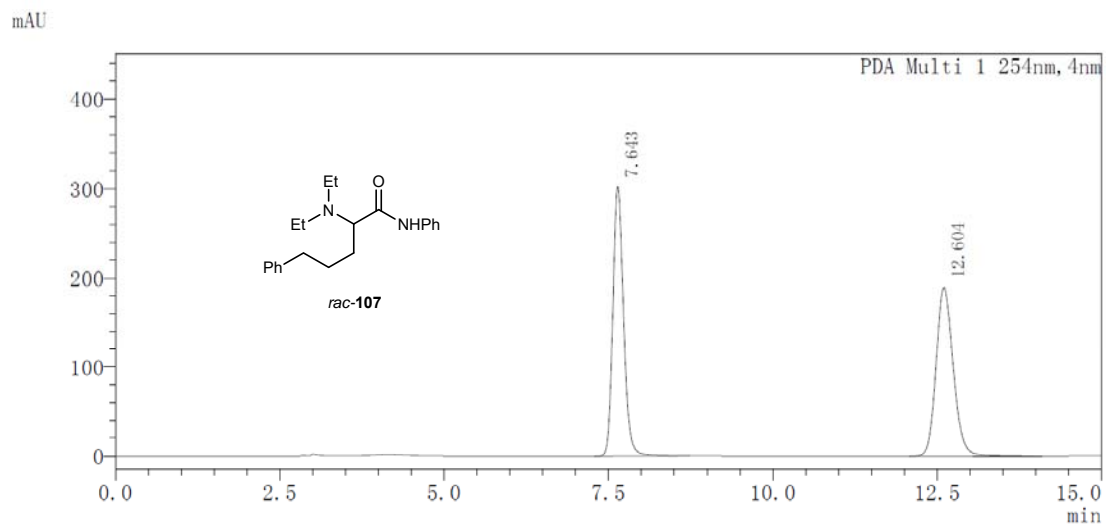

Peak Table

PDA Ch1 254nm

| Peak# | Ret. Time | Area    | Area%  |
|-------|-----------|---------|--------|
| 1     | 7.643     | 3420372 | 49.843 |
| 2     | 12.604    | 3441875 | 50.157 |

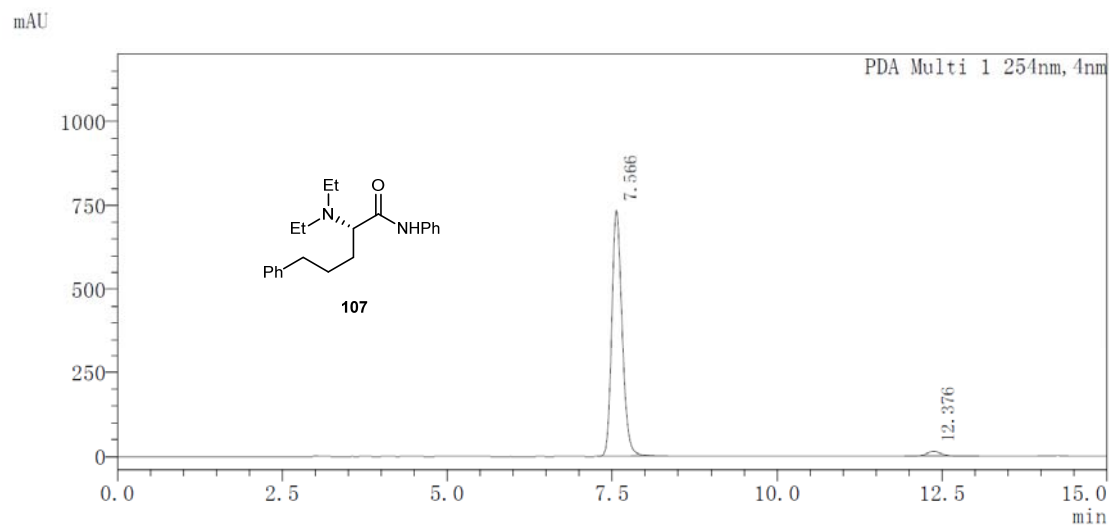

Peak Table

PDA Ch1 254nm

| Peak# | Ret. Time | Area    | Area%  |
|-------|-----------|---------|--------|
| 1     | 7.566     | 8005948 | 97.205 |
| 2     | 12.376    | 230214  | 2.795  |

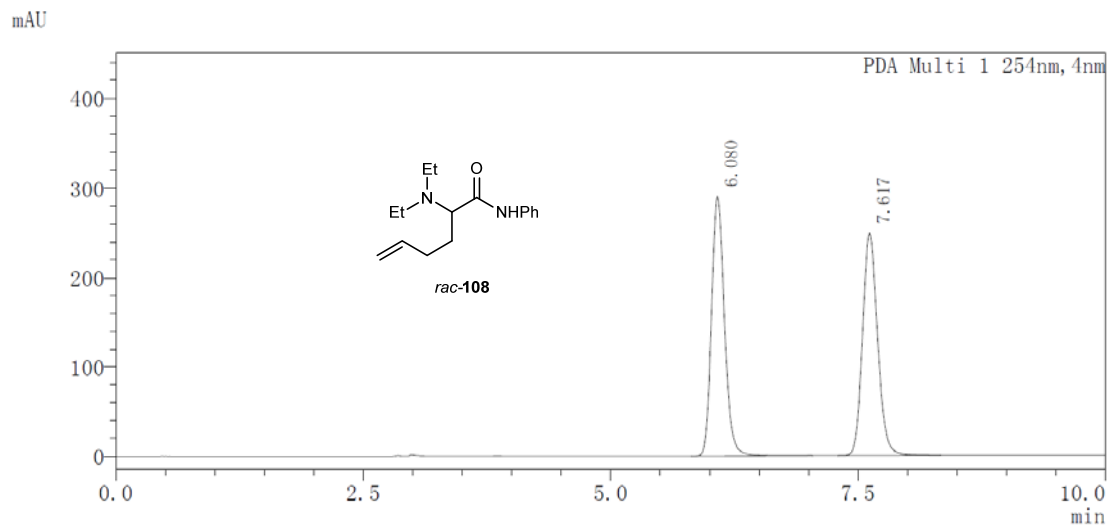

Peak Table

PDA Ch1 254nm

| Peak# | Ret. Time | Area    | Area%  |
|-------|-----------|---------|--------|
| 1     | 6.080     | 2648168 | 50.113 |
| 2     | 7.617     | 2636185 | 49.887 |

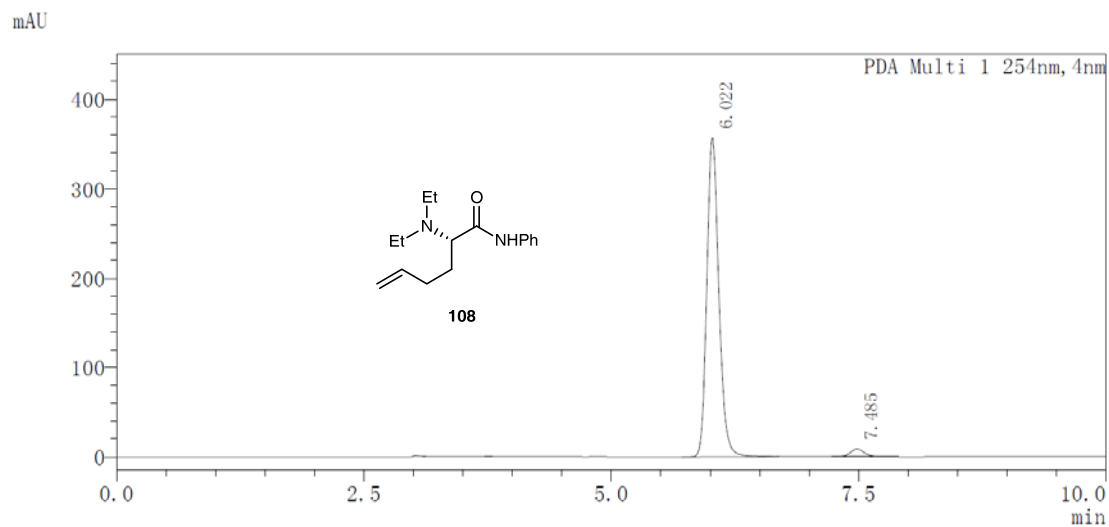

Peak Table

PDA Ch1 254nm

| Peak# | Ret. Time | Area    | Area%  |
|-------|-----------|---------|--------|
| 1     | 6.022     | 3019042 | 97.279 |
| 2     | 7.485     | 84447   | 2.721  |

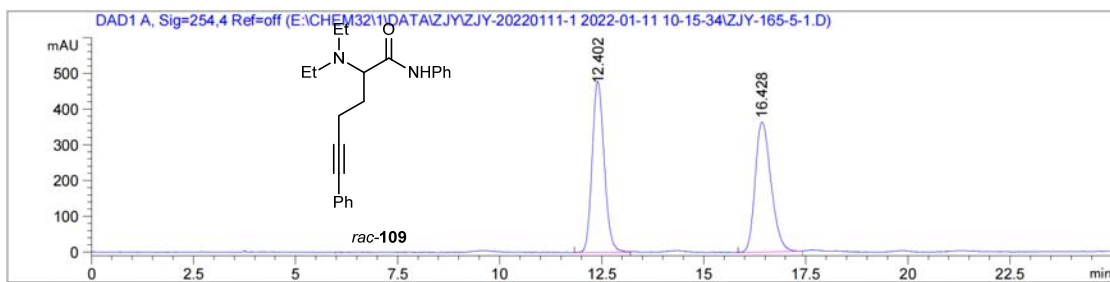

Signal 1: DAD1 A, Sig=254,4 Ref=off

| Peak # | RetTime [min] | Type | Width [min] | Area [mAU*s] | Height [mAU] | Area %  |
|--------|---------------|------|-------------|--------------|--------------|---------|
| 1      | 12.402        | BV R | 0.3168      | 9789.81348   | 478.21973    | 49.9561 |
| 2      | 16.428        | BV R | 0.4108      | 9807.02832   | 363.50250    | 50.0439 |

Totals : 1.95968e4 841.72223

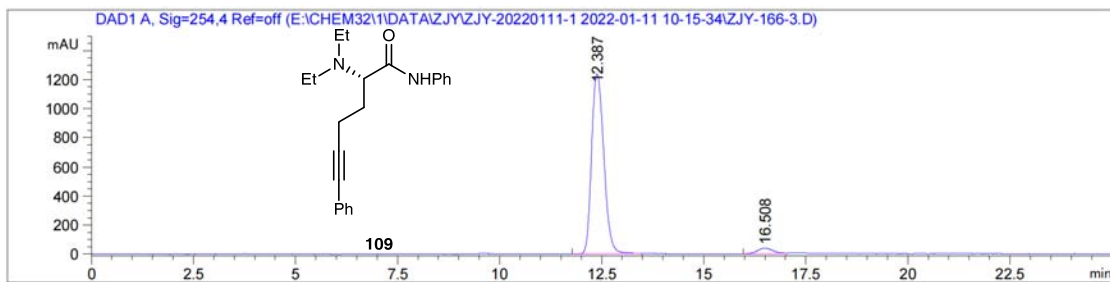

Signal 1: DAD1 A, Sig=254,4 Ref=off

| Peak # | RetTime [min] | Type | Width [min] | Area [mAU*s] | Height [mAU] | Area %  |
|--------|---------------|------|-------------|--------------|--------------|---------|
| 1      | 12.387        | VV R | 0.3250      | 2.57855e4    | 1237.81445   | 96.4664 |
| 2      | 16.508        | BB   | 0.3057      | 944.53394    | 37.52529     | 3.5336  |

Totals : 2.67300e4 1275.33974

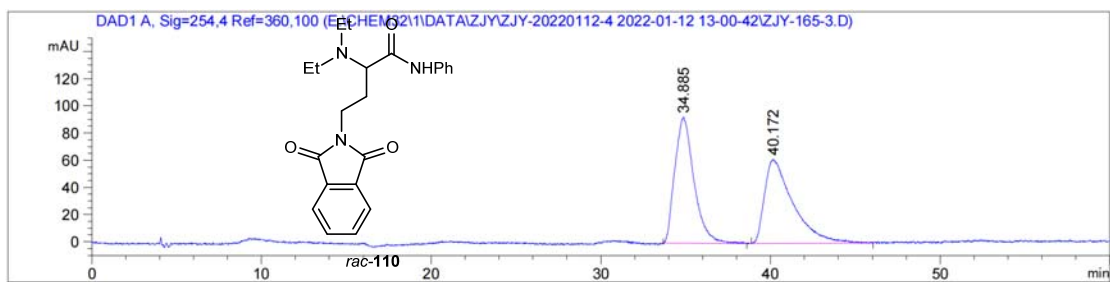

Signal 1: DAD1 A, Sig=254,4 Ref=360,100

| Peak # | RetTime [min] | Type | Width [min] | Area [mAU*s] | Height [mAU] | Area %  |
|--------|---------------|------|-------------|--------------|--------------|---------|
| 1      | 34.885        | MM R | 1.3089      | 7283.23486   | 92.74132     | 50.1853 |
| 2      | 40.172        | MM R | 1.9418      | 7229.45703   | 62.05247     | 49.8147 |

Totals : 1.45127e4 154.79379

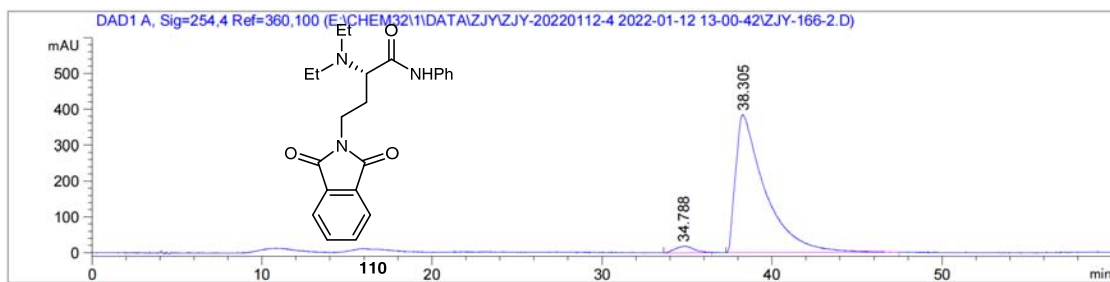

Signal 1: DAD1 A, Sig=254,4 Ref=360,100

| Peak # | RetTime [min] | Type | Width [min] | Area [mAU*s] | Height [mAU] | Area %  |
|--------|---------------|------|-------------|--------------|--------------|---------|
| 1      | 34.788        | MM R | 1.2517      | 1396.15027   | 18.59076     | 2.9167  |
| 2      | 38.305        | MM R | 2.0142      | 4.64713e4    | 384.53253    | 97.0833 |

Totals : 4.78675e4 403.12329

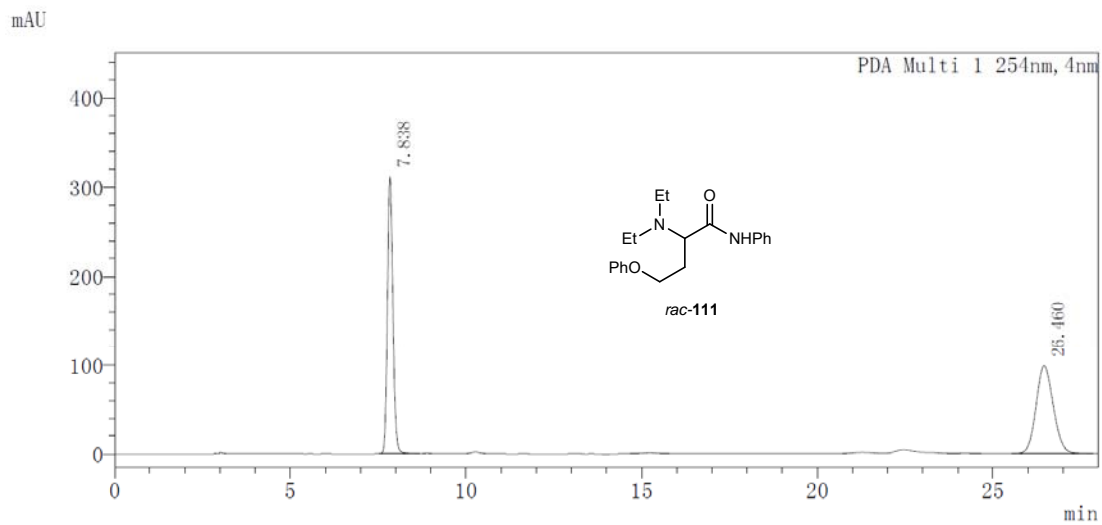

Peak Table

PDA Ch1 254nm

| Peak# | Ret. Time | Area    | Area%  |
|-------|-----------|---------|--------|
| 1     | 7.838     | 3383405 | 49.974 |
| 2     | 26.460    | 3386924 | 50.026 |

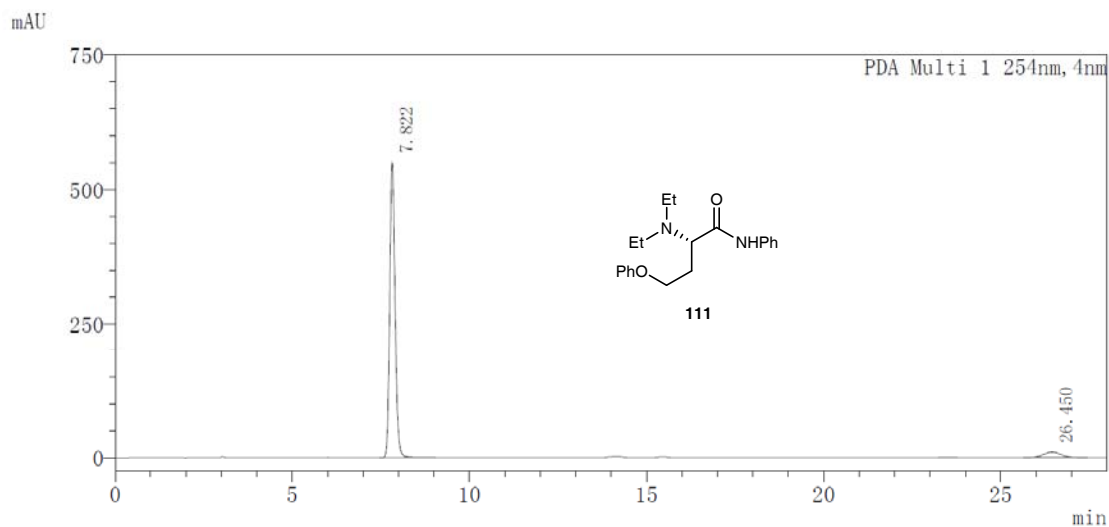

Peak Table

PDA Ch1 254nm

| Peak# | Ret. Time | Area    | Area%  |
|-------|-----------|---------|--------|
| 1     | 7.822     | 5773138 | 94.310 |
| 2     | 26.450    | 348292  | 5.690  |

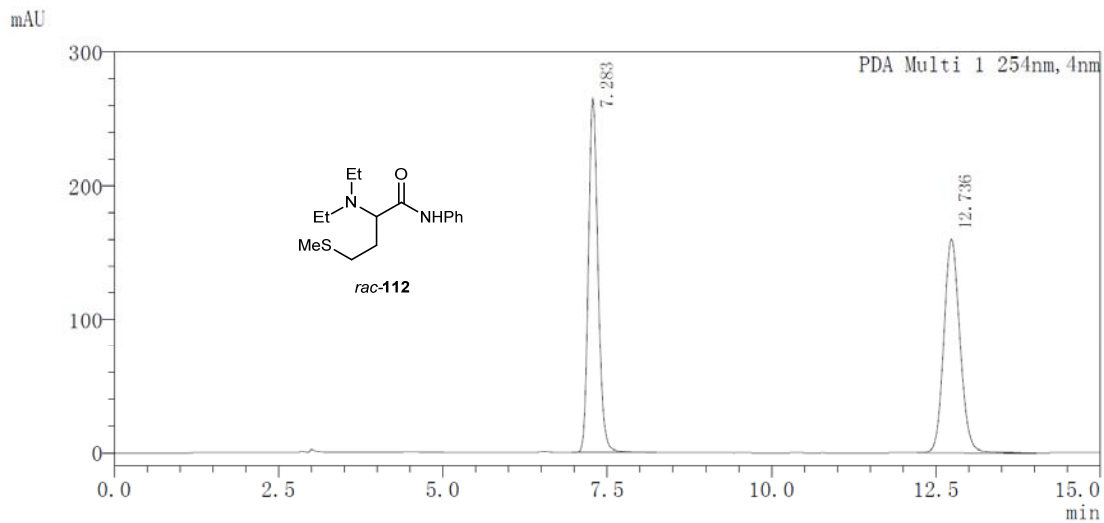

Peak Table

PDA Ch1 254nm

| Peak# | Ret. Time | Area    | Area%  |
|-------|-----------|---------|--------|
| 1     | 7.283     | 2711116 | 49.879 |
| 2     | 12.736    | 2724269 | 50.121 |

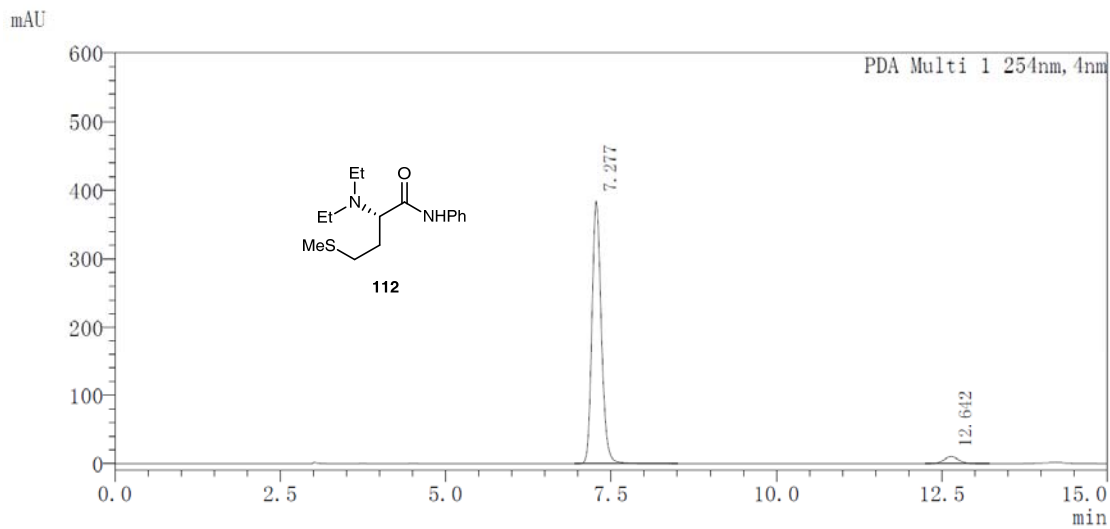

Peak Table

PDA Ch1 254nm

| Peak# | Ret. Time | Area    | Area%  |
|-------|-----------|---------|--------|
| 1     | 7.277     | 3792837 | 95.966 |
| 2     | 12.642    | 159422  | 4.034  |

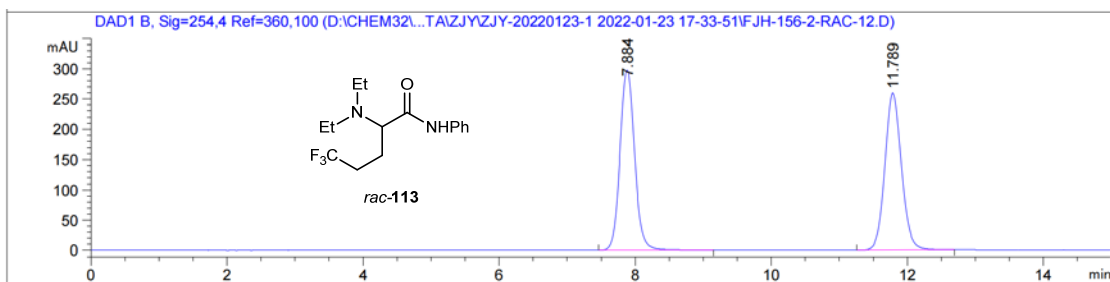

Signal 2: DAD1 B, Sig=254,4 Ref=360,100

| Peak # | RetTime [min] | Type | Width [min] | Area [mAU*s] | Height [mAU] | Area %  |
|--------|---------------|------|-------------|--------------|--------------|---------|
| 1      | 7.884         | BB   | 0.2317      | 4432.55029   | 297.66904    | 50.0920 |
| 2      | 11.789        | BB   | 0.2604      | 4416.26904   | 259.71228    | 49.9080 |

Totals : 8848.81934 557.38132

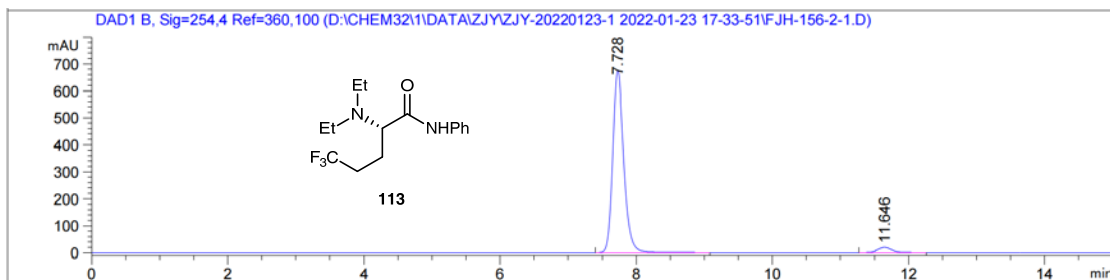

Signal 2: DAD1 B, Sig=254,4 Ref=360,100

| Peak # | RetTime [min] | Type | Width [min] | Area [mAU*s] | Height [mAU] | Area %  |
|--------|---------------|------|-------------|--------------|--------------|---------|
| 1      | 7.728         | BB   | 0.1717      | 7628.06348   | 675.65509    | 96.3487 |
| 2      | 11.646        | BB   | 0.2207      | 289.08072    | 19.99765     | 3.6513  |

Totals : 7917.14420 695.65274

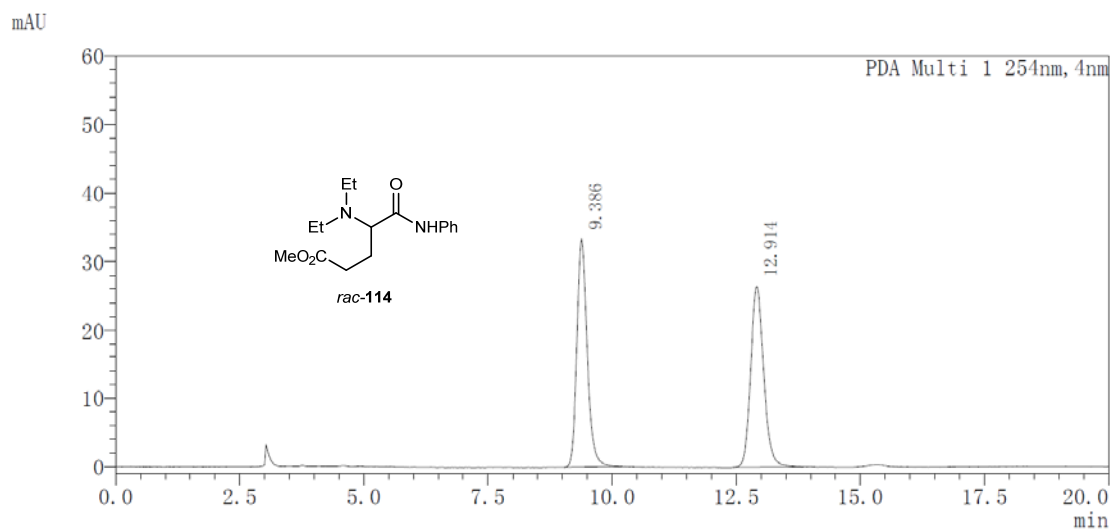

Peak Table

PDA Ch1 254nm

| Peak# | Ret. Time | Area   | Area%  |
|-------|-----------|--------|--------|
| 1     | 9.386     | 485202 | 50.066 |
| 2     | 12.914    | 483925 | 49.934 |

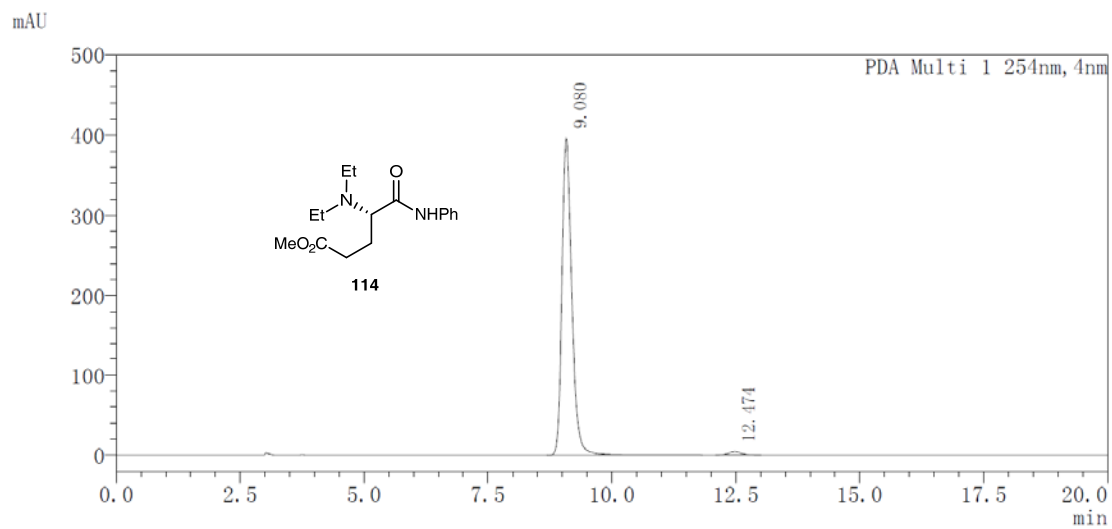

Peak Table

PDA Ch1 254nm

| Peak# | Ret. Time | Area    | Area%  |
|-------|-----------|---------|--------|
| 1     | 9.080     | 5471343 | 98.637 |
| 2     | 12.474    | 75616   | 1.363  |



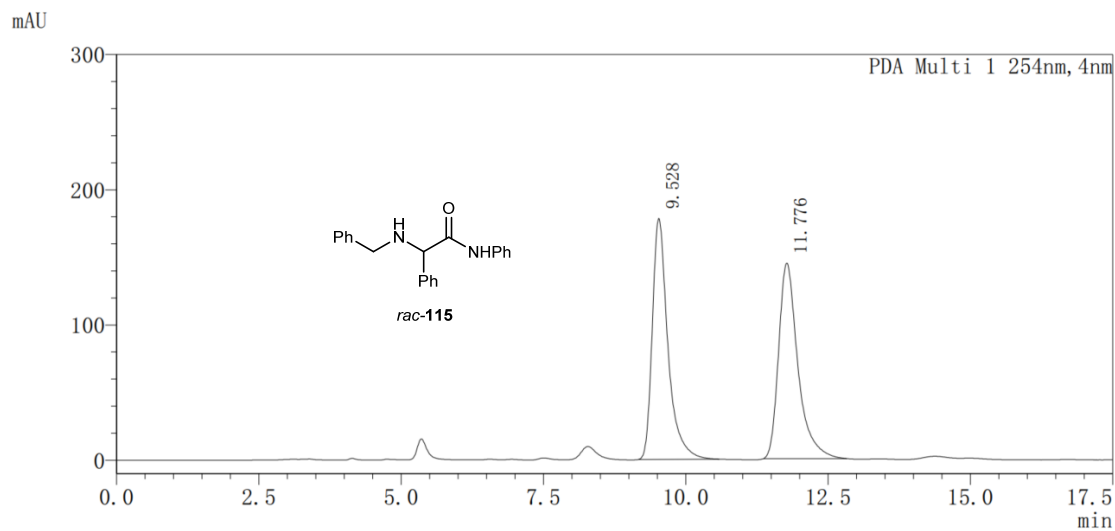

Peak Table

PDA Ch1 254nm

| Peak# | Ret. Time | Area    | Area%  |
|-------|-----------|---------|--------|
| 1     | 9.528     | 3401783 | 49.966 |
| 2     | 11.776    | 3406451 | 50.034 |

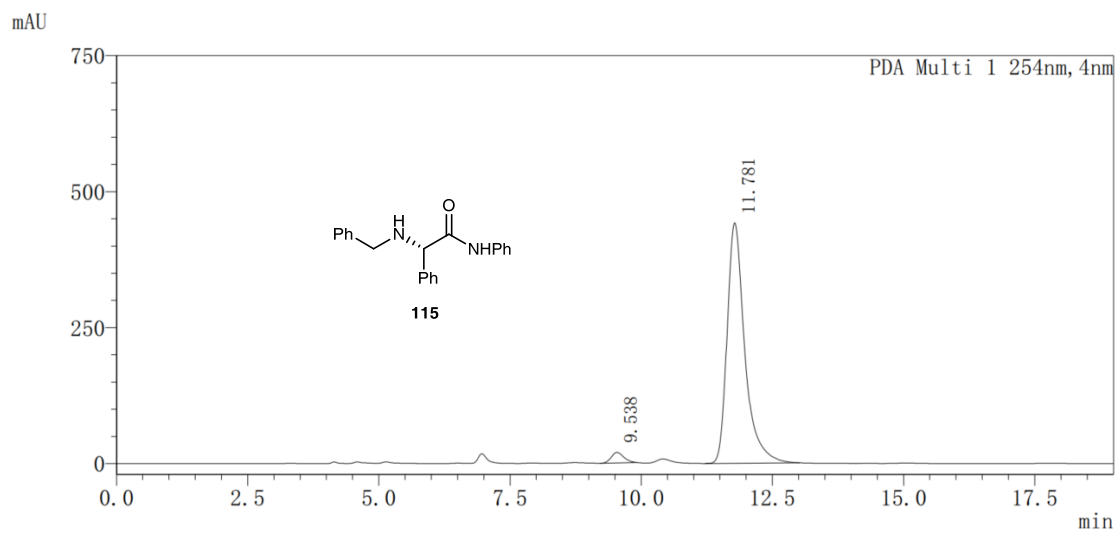

Peak Table

PDA Ch1 254nm

| Peak# | Ret. Time | Area     | Area%  |
|-------|-----------|----------|--------|
| 1     | 9.538     | 326486   | 3.054  |
| 2     | 11.781    | 10365105 | 96.946 |

mAU

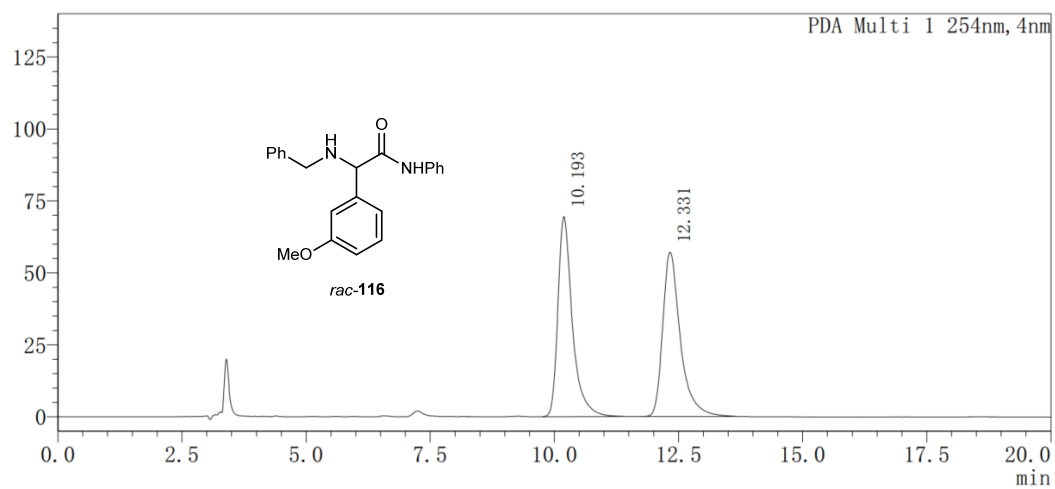

Peak Table

PDA Ch1 254nm

| Peak# | Ret. Time | Area    | Area%  |
|-------|-----------|---------|--------|
| 1     | 10.193    | 1404887 | 49.876 |
| 2     | 12.331    | 1411890 | 50.124 |

mAU

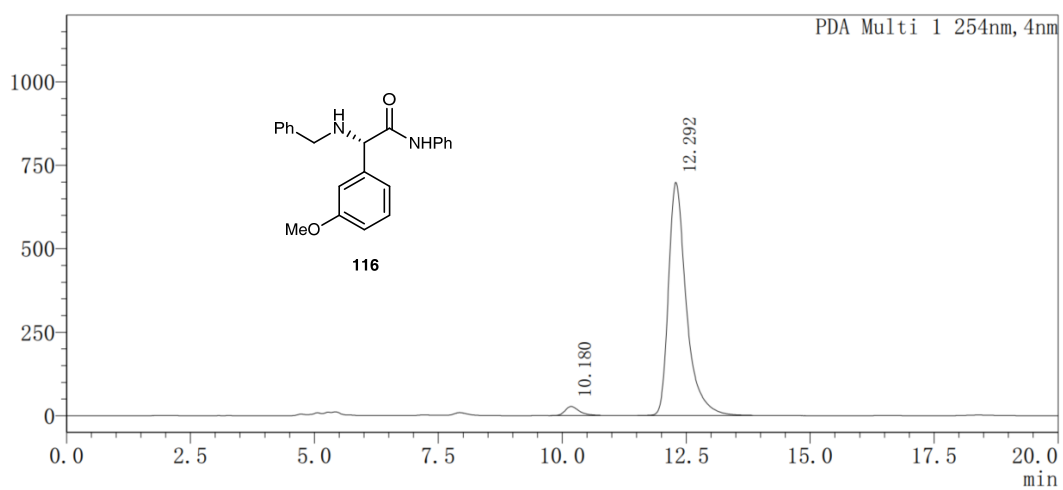

Peak Table

PDA Ch1 254nm

| Peak# | Ret. Time | Area     | Area%  |
|-------|-----------|----------|--------|
| 1     | 10.180    | 533215   | 2.950  |
| 2     | 12.292    | 17543061 | 97.050 |

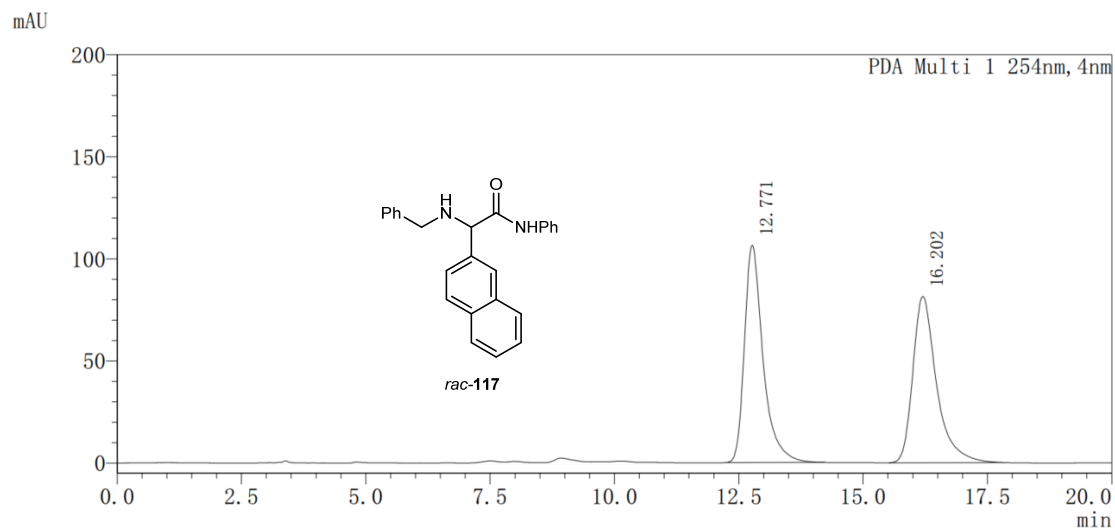

Peak Table

PDA Ch1 254nm

| Peak# | Ret. Time | Area    | Area%  |
|-------|-----------|---------|--------|
| 1     | 12.771    | 2781684 | 50.711 |
| 2     | 16.202    | 2703708 | 49.289 |

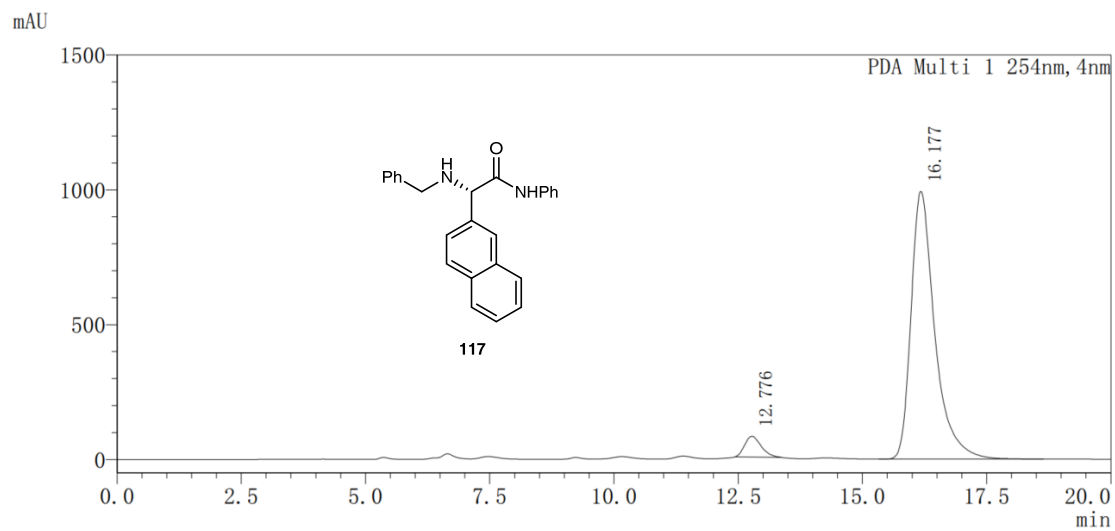

Peak Table

PDA Ch1 254nm

| Peak# | Ret. Time | Area     | Area%  |
|-------|-----------|----------|--------|
| 1     | 12.776    | 1781546  | 5.119  |
| 2     | 16.177    | 33019701 | 94.881 |

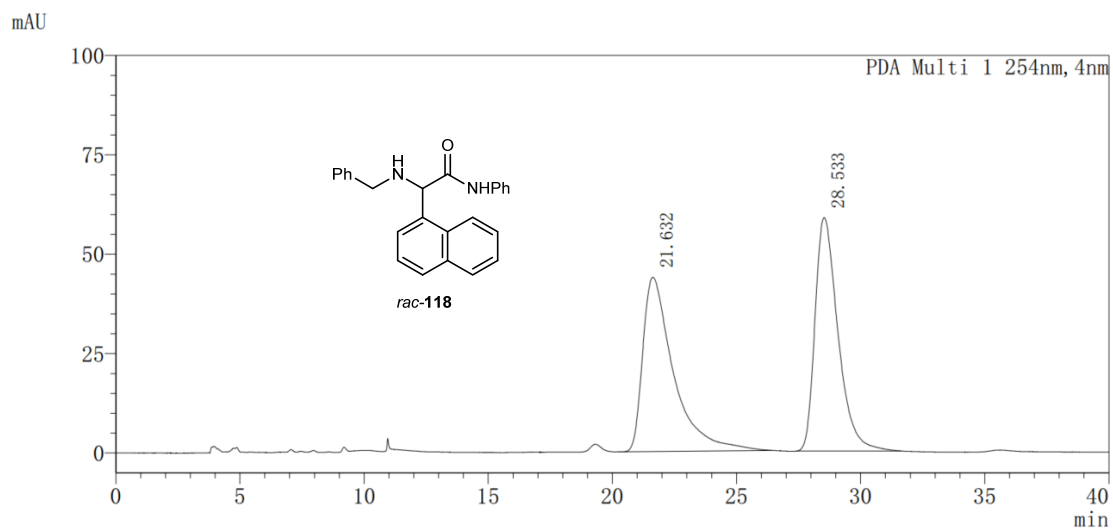

Peak Table

PDA Ch1 254nm

| Peak# | Ret. Time | Area    | Area%  |
|-------|-----------|---------|--------|
| 1     | 21.632    | 3782749 | 50.017 |
| 2     | 28.533    | 3780112 | 49.983 |

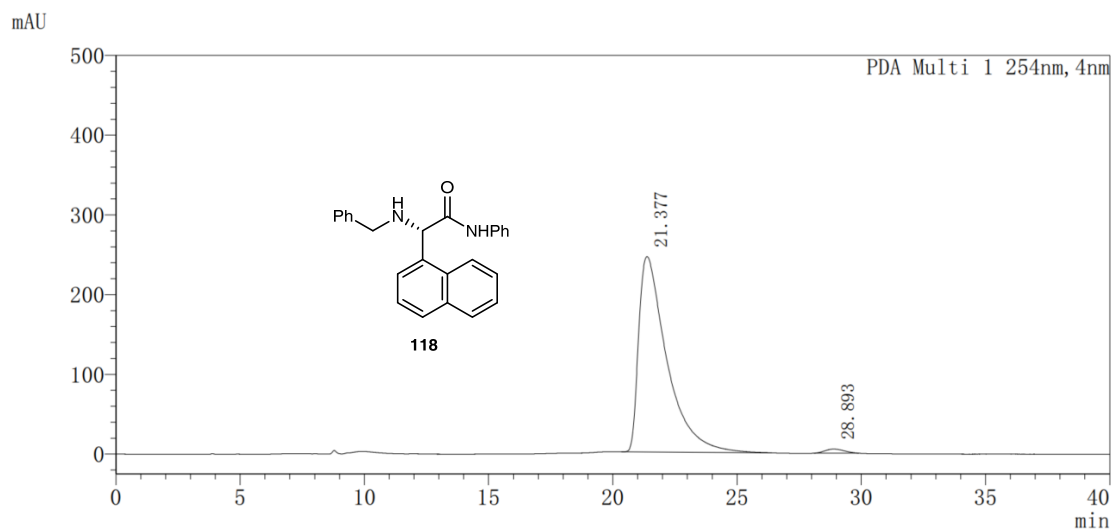

Peak Table

PDA Ch1 254nm

| Peak# | Ret. Time | Area     | Area%  |
|-------|-----------|----------|--------|
| 1     | 21.377    | 19353761 | 98.579 |
| 2     | 28.893    | 278939   | 1.421  |

mAU

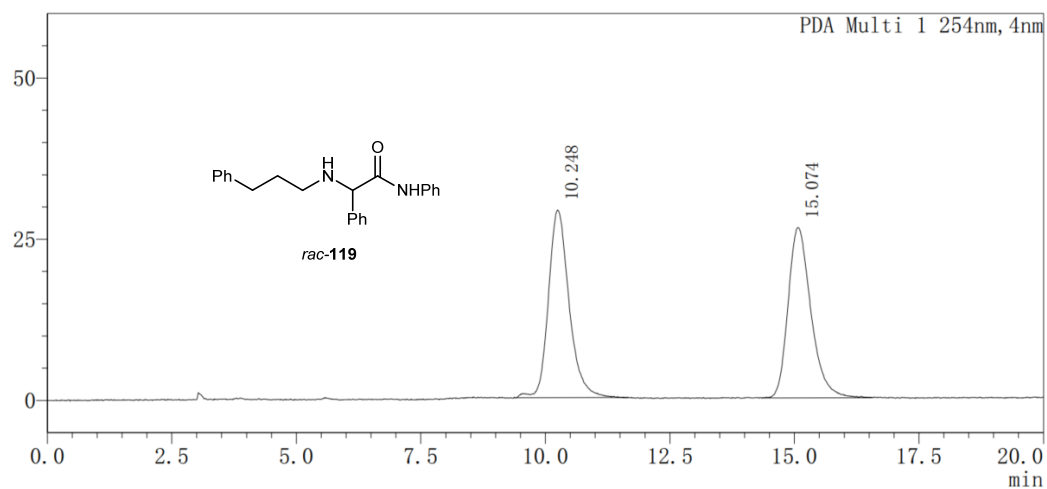

Peak Table

PDA Ch1 254nm

| Peak# | Ret. Time | Area   | Area%  |
|-------|-----------|--------|--------|
| 1     | 10.248    | 841047 | 49.940 |
| 2     | 15.074    | 843052 | 50.060 |

mAU

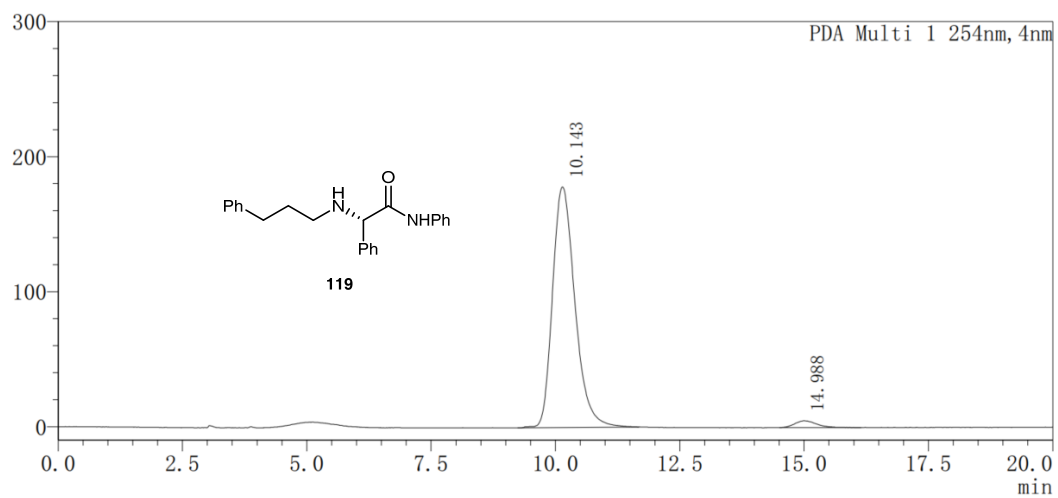

Peak Table

PDA Ch1 254nm

| Peak# | Ret. Time | Area    | Area%  |
|-------|-----------|---------|--------|
| 1     | 10.143    | 5616053 | 97.391 |
| 2     | 14.988    | 150446  | 2.609  |

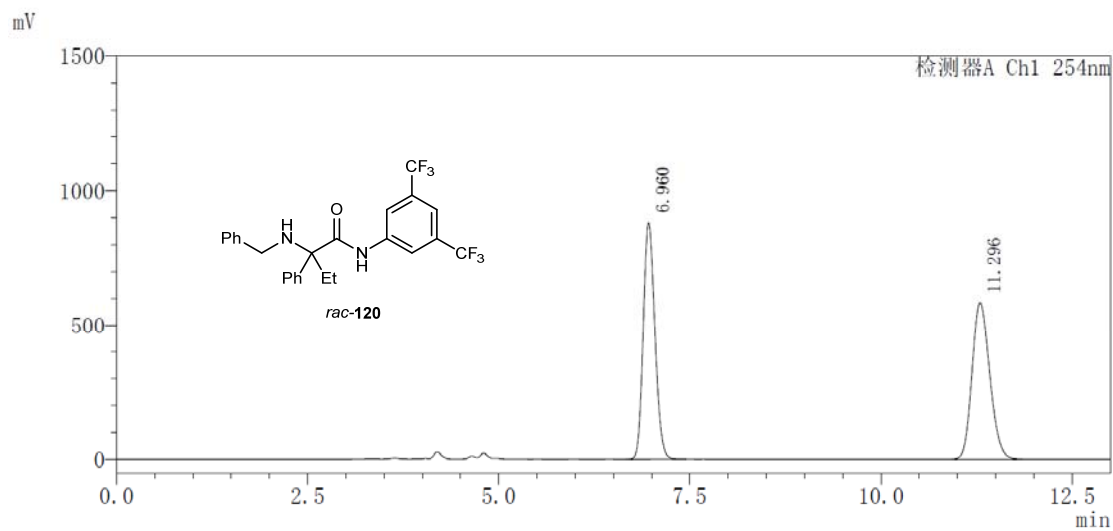

Peak Table

检测器A Ch1 254nm

| Peak# | Ret. Time | Area    | Area%  |
|-------|-----------|---------|--------|
| 1     | 6.960     | 9352184 | 49.711 |
| 2     | 11.296    | 9461049 | 50.289 |

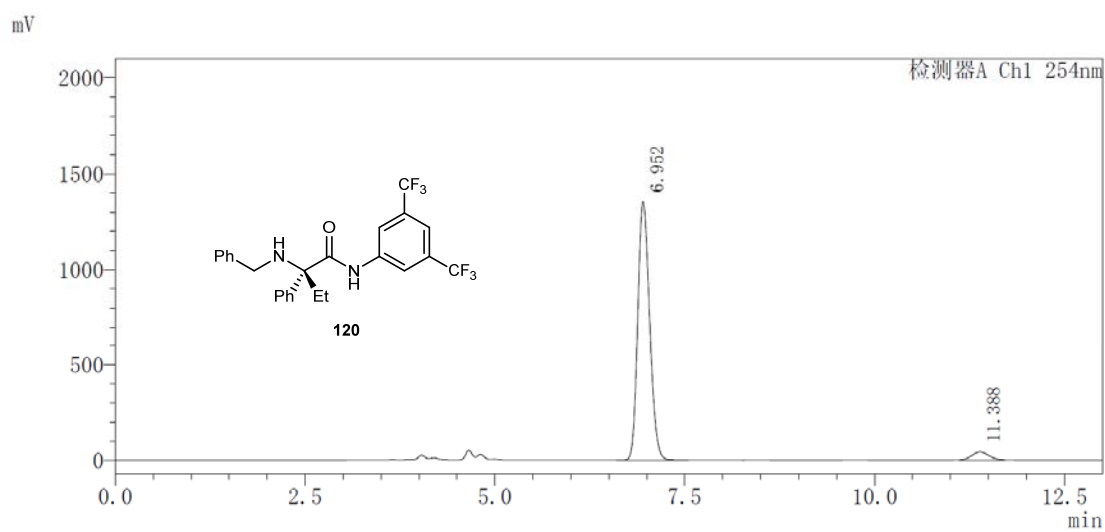

Peak Table

检测器A Ch1 254nm

| Peak# | Ret. Time | Area     | Area%  |
|-------|-----------|----------|--------|
| 1     | 6.952     | 14741483 | 95.558 |
| 2     | 11.388    | 685196   | 4.442  |

mV

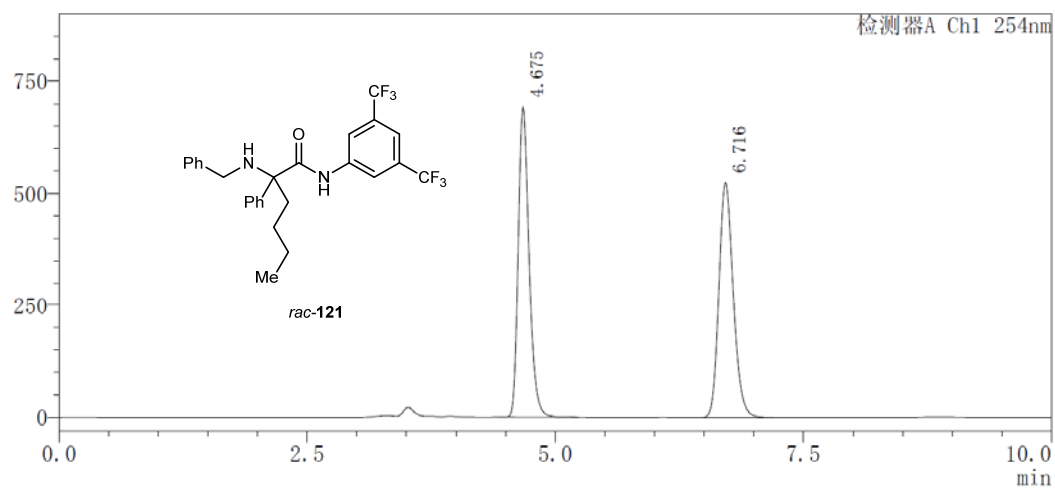

Peak Table

检测器A Ch1 254nm

| Peak# | Ret. Time | Area    | Area%  |
|-------|-----------|---------|--------|
| 1     | 4.675     | 5253471 | 49.860 |
| 2     | 6.716     | 5282926 | 50.140 |

mV

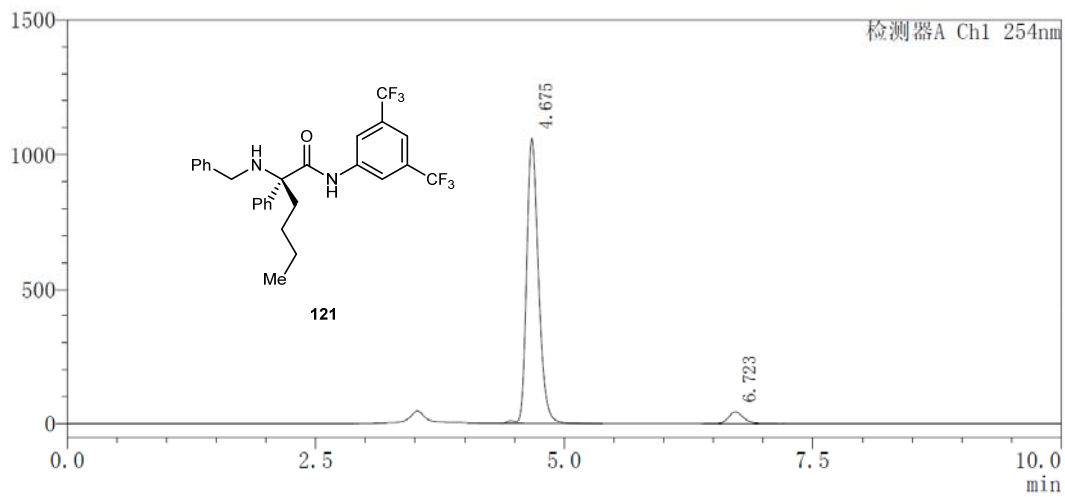

Peak Table

检测器A Ch1 254nm

| Peak# | Ret. Time | Area    | Area%  |
|-------|-----------|---------|--------|
| 1     | 4.675     | 8729896 | 95.086 |
| 2     | 6.723     | 451186  | 4.914  |

mV

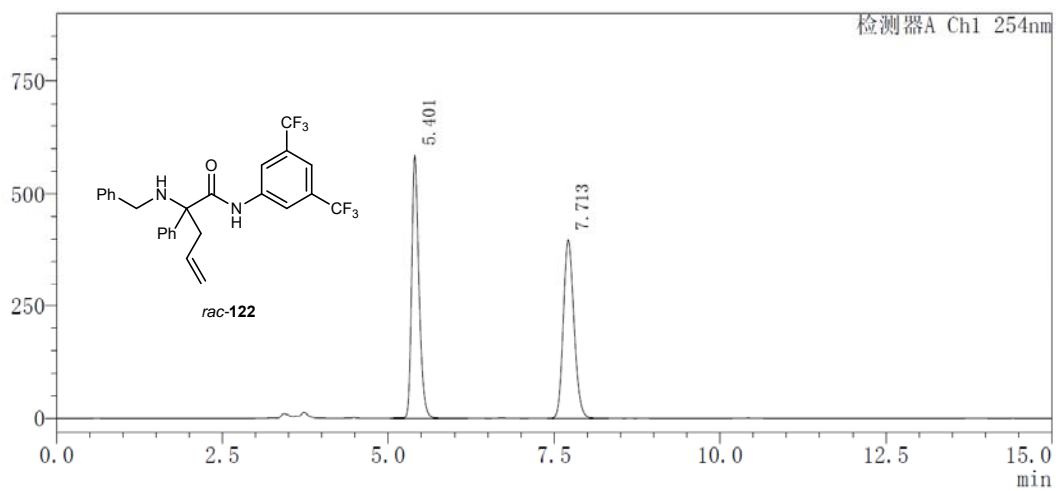

Peak Table

检测器A Ch1 254nm

| Peak# | Ret. Time | Area    | Area%  |
|-------|-----------|---------|--------|
| 1     | 5.401     | 4476822 | 50.014 |
| 2     | 7.713     | 4474357 | 49.986 |

mV

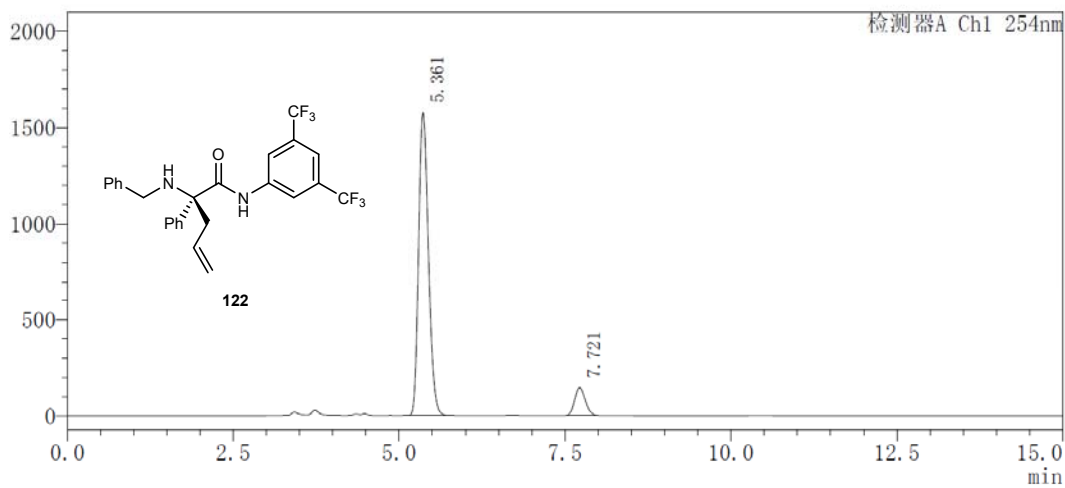

Peak Table

检测器A Ch1 254nm

| Peak# | Ret. Time | Area     | Area%  |
|-------|-----------|----------|--------|
| 1     | 5.361     | 16201881 | 91.024 |
| 2     | 7.721     | 1597707  | 8.976  |



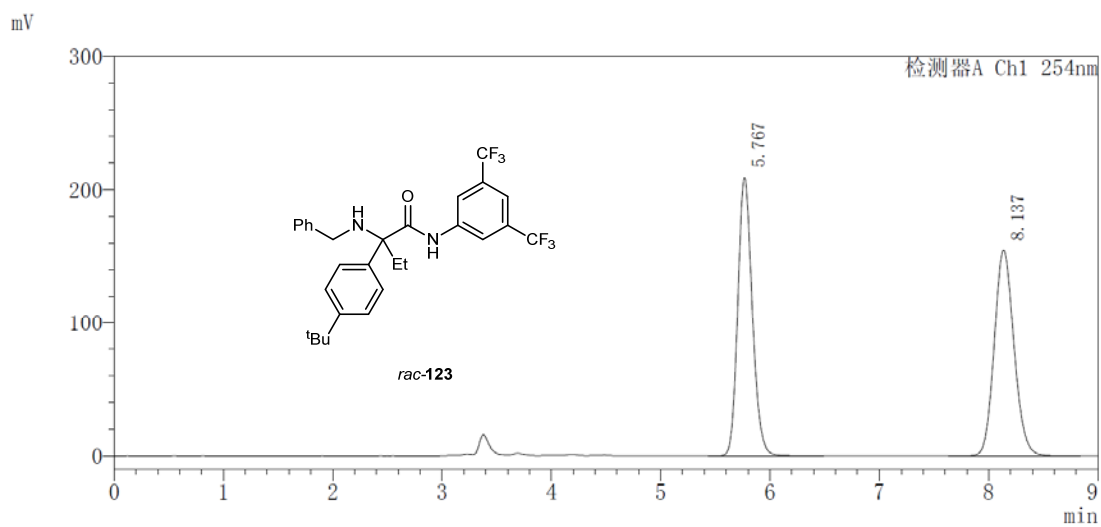

Peak Table

检测器A Ch1 254nm

| Peak# | Ret. Time | Area    | Area%  |
|-------|-----------|---------|--------|
| 1     | 5.767     | 1918833 | 49.767 |
| 2     | 8.137     | 1936766 | 50.233 |

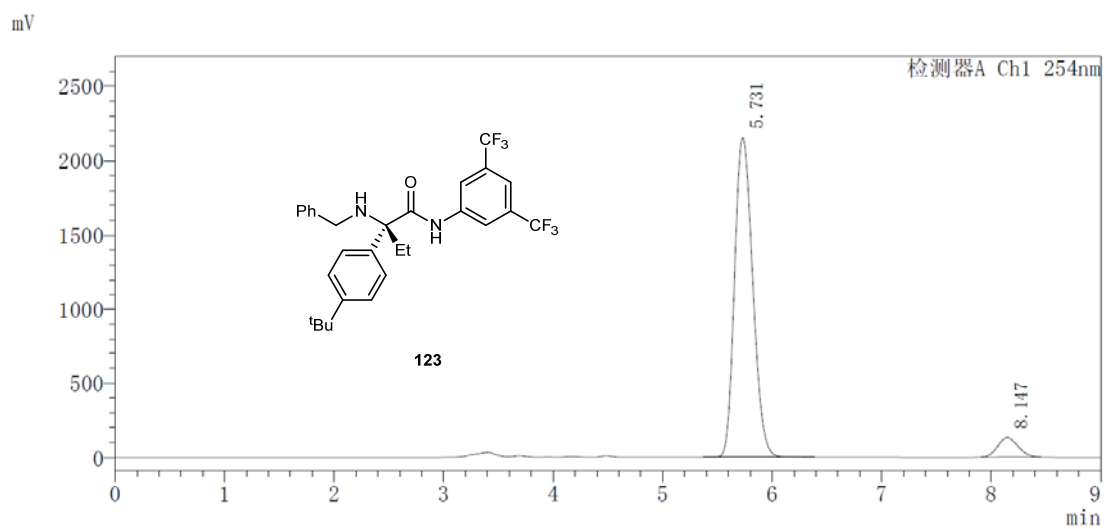

Peak Table

检测器A Ch1 254nm

| Peak# | Ret. Time | Area     | Area%  |
|-------|-----------|----------|--------|
| 1     | 5.731     | 24926072 | 93.573 |
| 2     | 8.147     | 1712019  | 6.427  |

mV

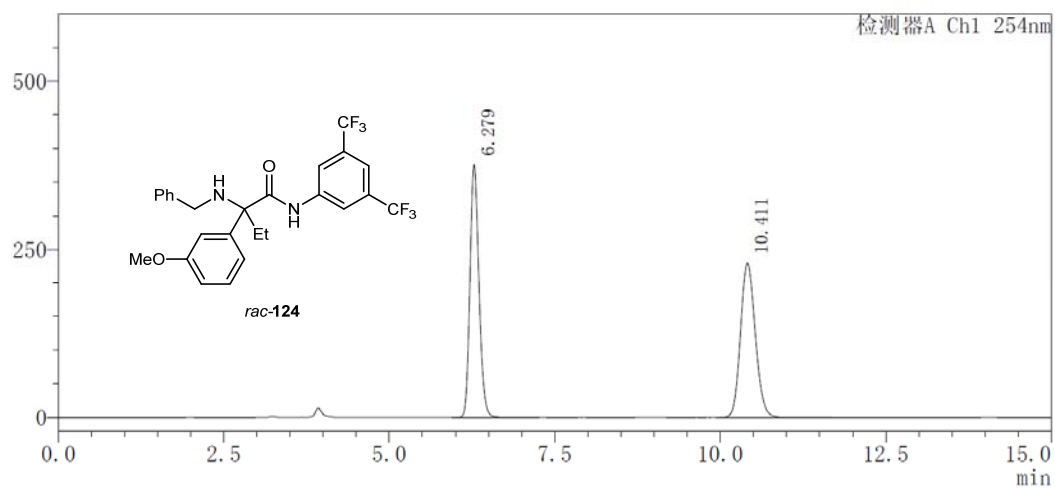

Peak Table

检测器A Ch1 254nm

| Peak# | Ret. Time | Area    | Area%  |
|-------|-----------|---------|--------|
| 1     | 6.279     | 3539361 | 49.846 |
| 2     | 10.411    | 3561234 | 50.154 |

mV

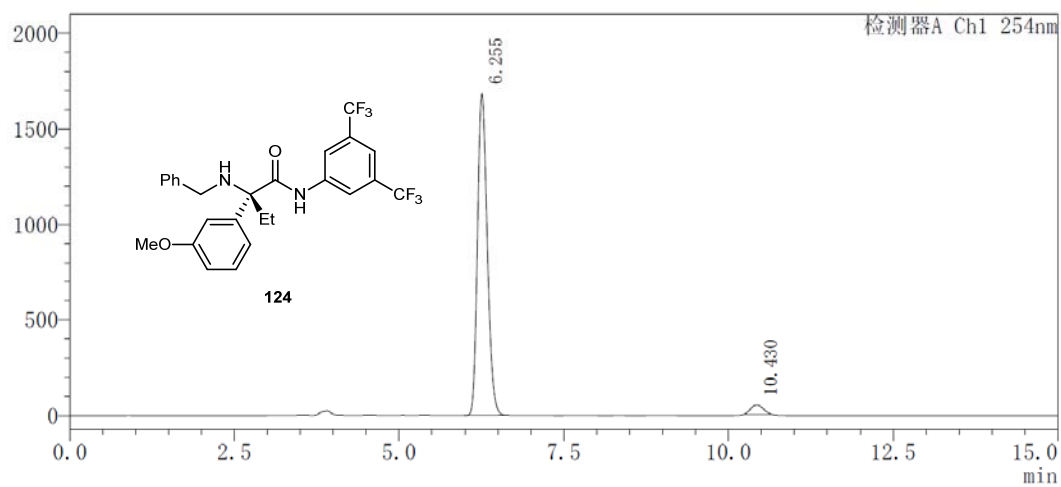

Peak Table

检测器A Ch1 254nm

| Peak# | Ret. Time | Area     | Area%  |
|-------|-----------|----------|--------|
| 1     | 6.255     | 17399567 | 96.182 |
| 2     | 10.430    | 690639   | 3.818  |

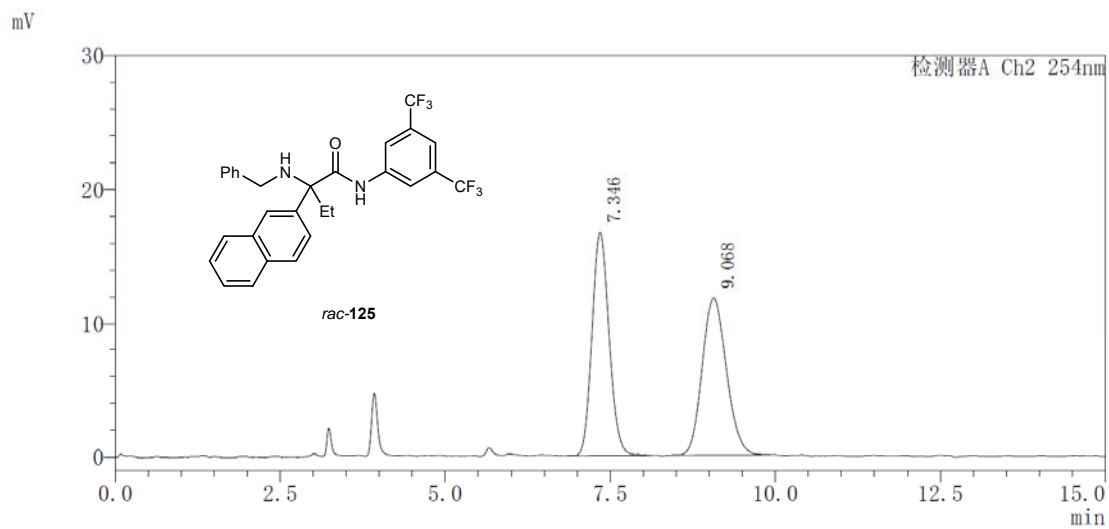

Peak Table

检测器A Ch2 254nm

| Peak# | Ret. Time | Area   | Area%  |
|-------|-----------|--------|--------|
| 1     | 7.346     | 301032 | 50.263 |
| 2     | 9.068     | 297881 | 49.737 |

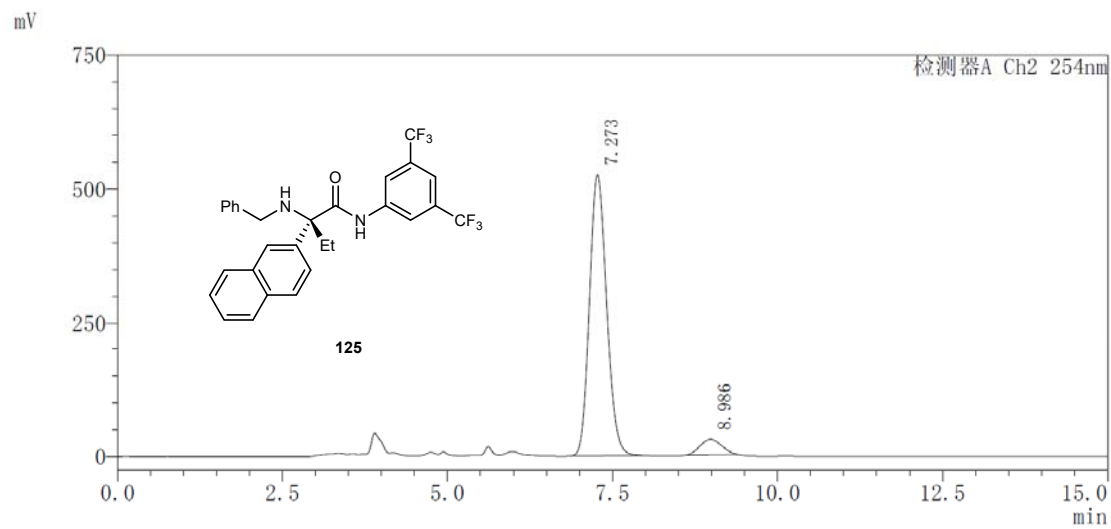

Peak Table

检测器A Ch2 254nm

| Peak# | Ret. Time | Area    | Area%  |
|-------|-----------|---------|--------|
| 1     | 7.273     | 9525711 | 93.494 |
| 2     | 8.986     | 662907  | 6.506  |

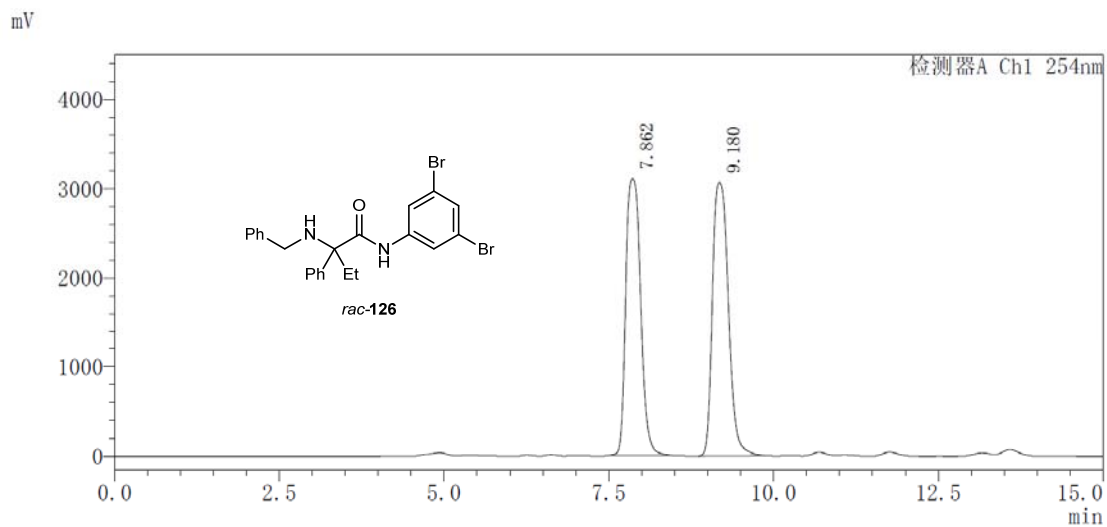

Peak Table

检测器A Ch1 254nm

| Peak# | Ret. Time | Area     | Area%  |
|-------|-----------|----------|--------|
| 1     | 7.862     | 48674582 | 48.606 |
| 2     | 9.180     | 51467351 | 51.394 |

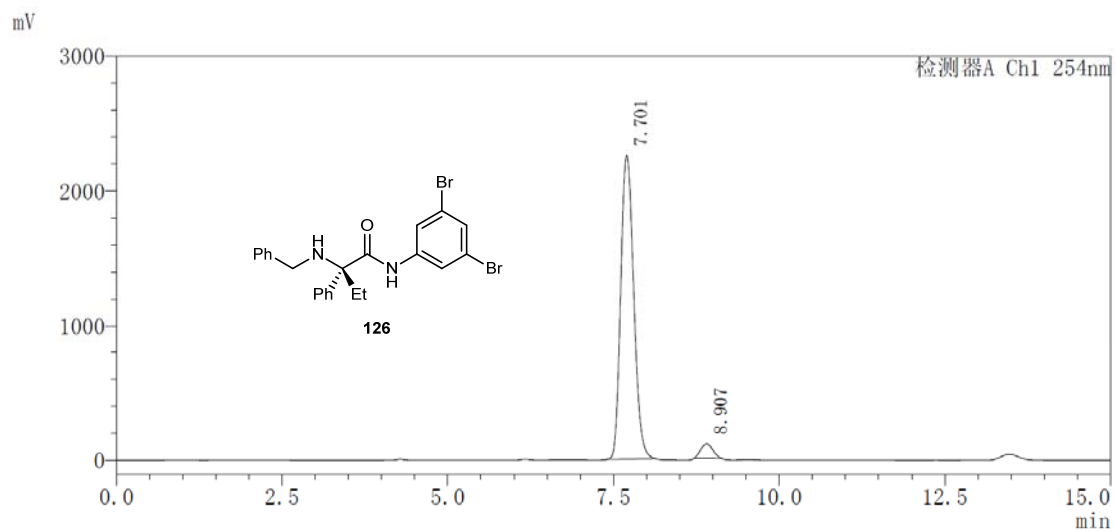

Peak Table

检测器A Ch1 254nm

| Peak# | Ret. Time | Area     | Area%  |
|-------|-----------|----------|--------|
| 1     | 7.701     | 30704112 | 95.795 |
| 2     | 8.907     | 1347815  | 4.205  |

mV

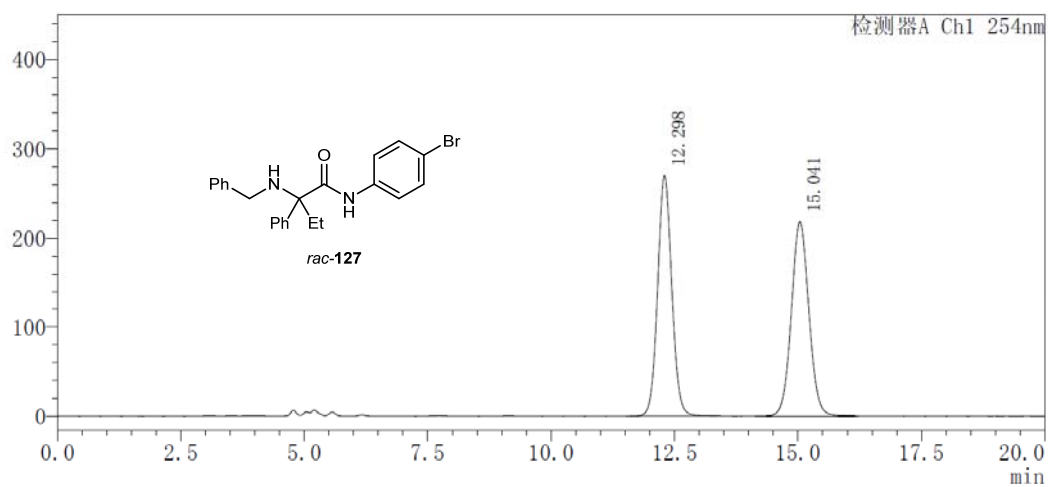

Peak Table

检测器A Ch1 254nm

| Peak# | Ret. Time | Area    | Area%  |
|-------|-----------|---------|--------|
| 1     | 12.298    | 5370324 | 49.941 |
| 2     | 15.041    | 5383120 | 50.059 |

mV

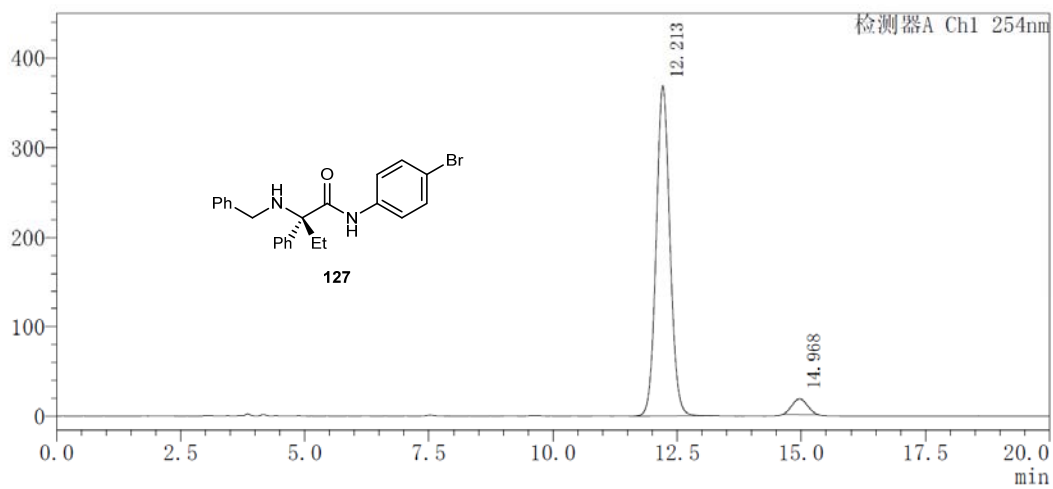

Peak Table

检测器A Ch1 254nm

| Peak# | Ret. Time | Area    | Area%  |
|-------|-----------|---------|--------|
| 1     | 12.213    | 7124997 | 94.936 |
| 2     | 14.968    | 380081  | 5.064  |

mAU

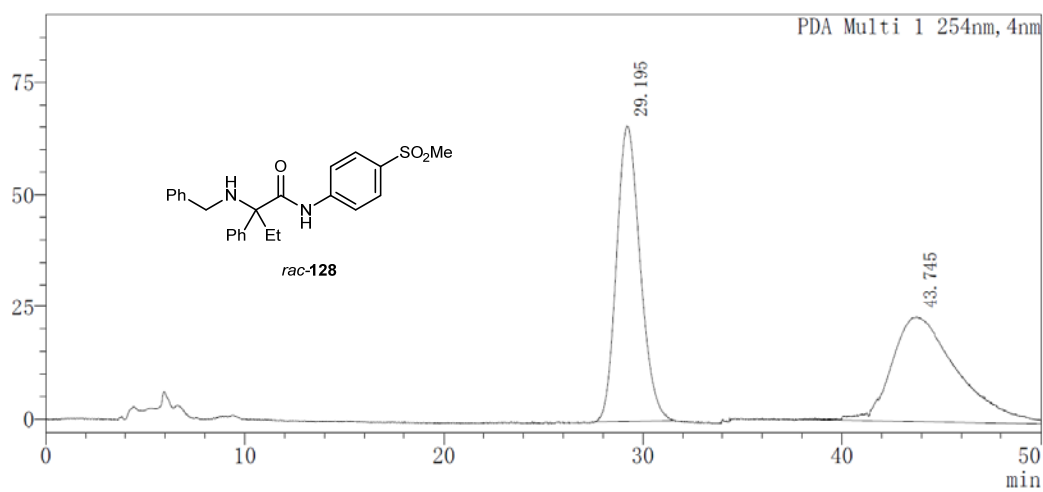

Peak Table

PDA Ch1 254nm

| Peak# | Ret. Time | Area    | Area%  |
|-------|-----------|---------|--------|
| 1     | 29.195    | 5444088 | 50.520 |
| 2     | 43.745    | 5332068 | 49.480 |

mAU

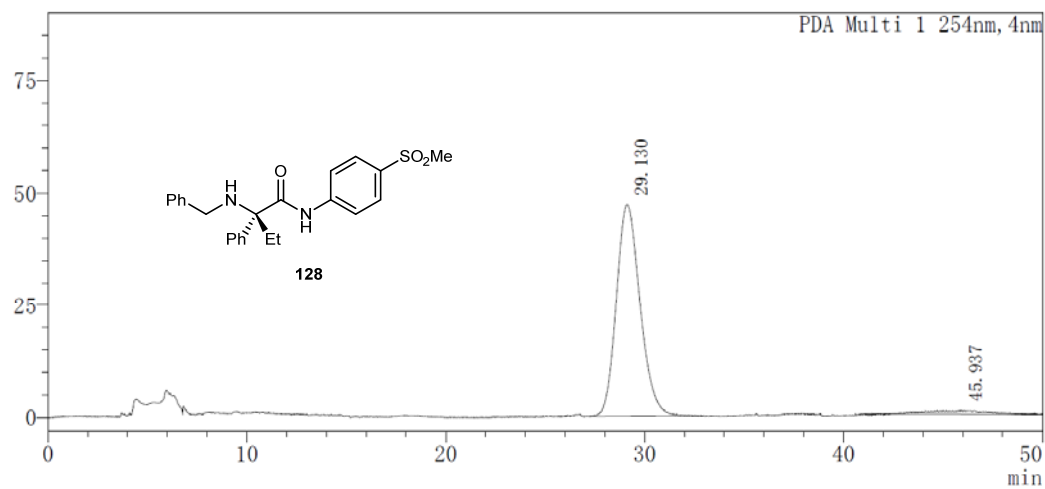

Peak Table

PDA Ch1 254nm

| Peak# | Ret. Time | Area    | Area%  |
|-------|-----------|---------|--------|
| 1     | 29.130    | 3909478 | 95.639 |
| 2     | 45.937    | 178257  | 4.361  |

mV

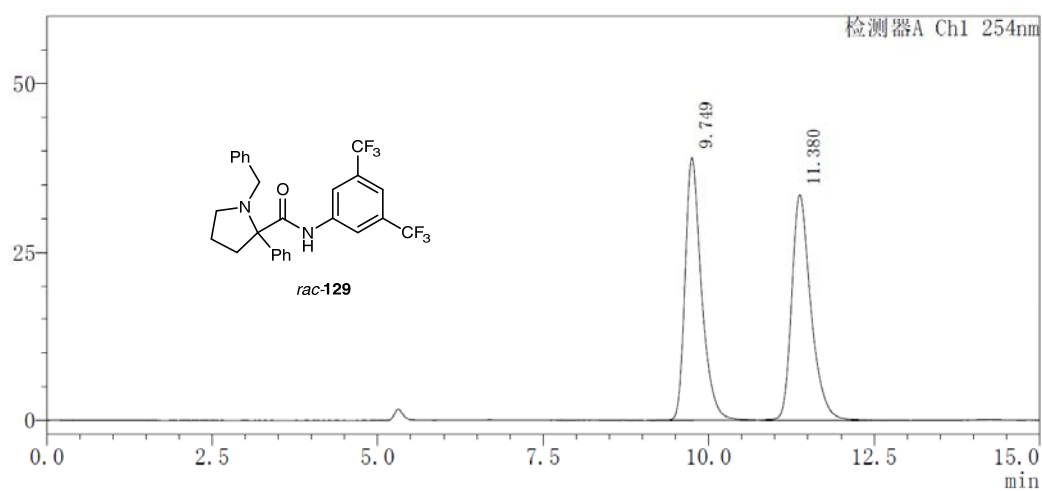

Peak Table

检测器A Ch1 254nm

| Peak# | Ret. Time | Area   | Area%  |
|-------|-----------|--------|--------|
| 1     | 9.749     | 672987 | 49.894 |
| 2     | 11.380    | 675847 | 50.106 |

mV

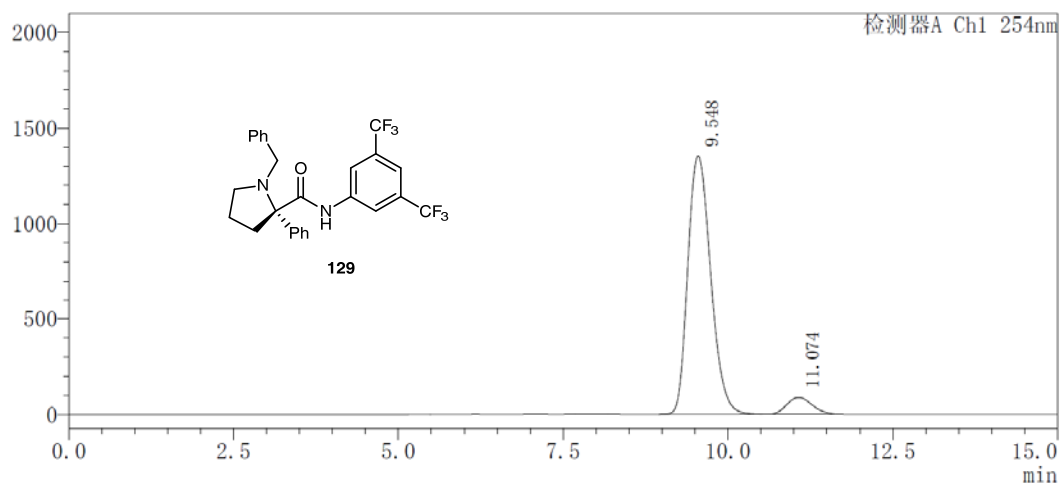

Peak Table

检测器A Ch1 254nm

| Peak# | Ret. Time | Area     | Area%  |
|-------|-----------|----------|--------|
| 1     | 9.548     | 32682775 | 93.280 |
| 2     | 11.074    | 2354406  | 6.720  |

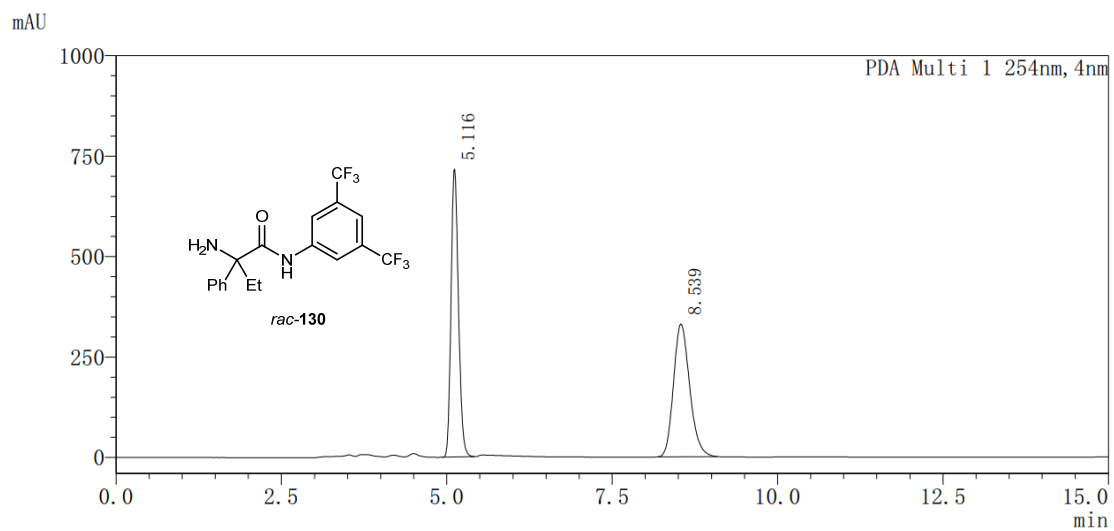

Peak Table

PDA Ch1 254nm

| Peak# | Ret. Time | Area    | Area%  |
|-------|-----------|---------|--------|
| 1     | 5.116     | 5575407 | 49.745 |
| 2     | 8.539     | 5632597 | 50.255 |

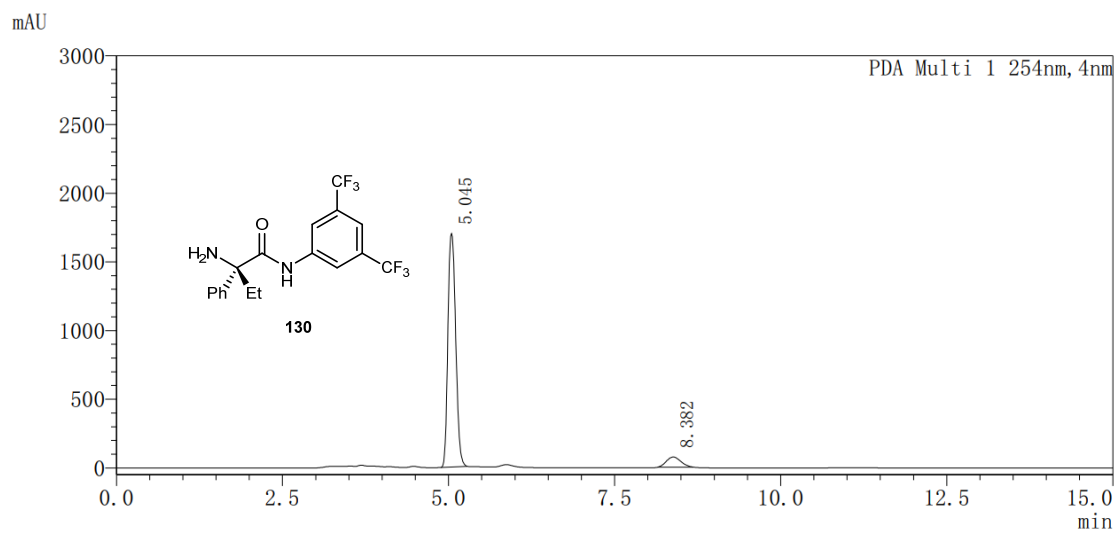

Peak Table

PDA Ch1 254nm

| Peak# | Ret. Time | Area     | Area%  |
|-------|-----------|----------|--------|
| 1     | 5.045     | 13834540 | 92.520 |
| 2     | 8.382     | 1118504  | 7.480  |



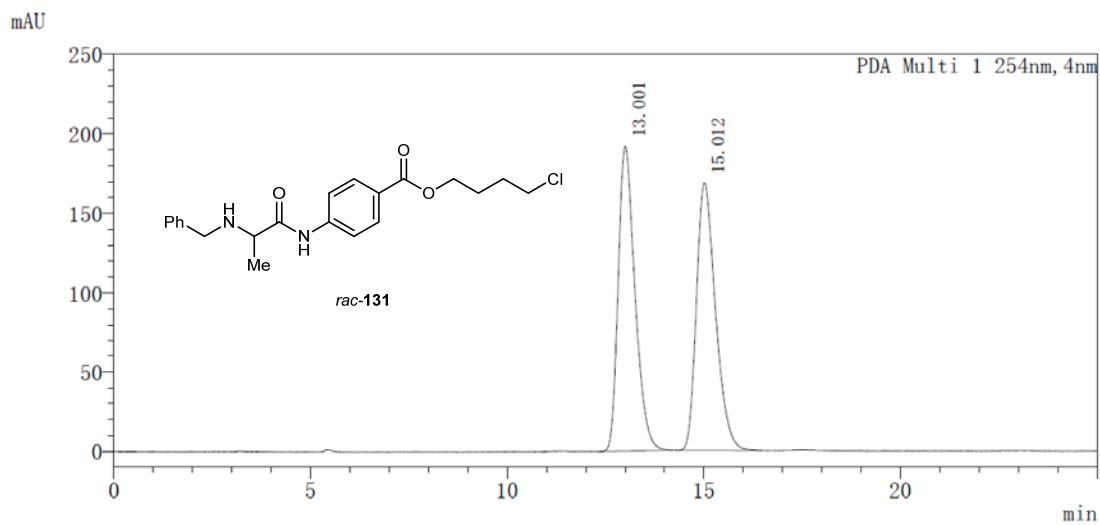

Peak Table

PDA Ch1 254nm

| Peak# | Ret. Time | Area    | Area%  |
|-------|-----------|---------|--------|
| 1     | 13.001    | 5688051 | 50.021 |
| 2     | 15.012    | 5683162 | 49.979 |

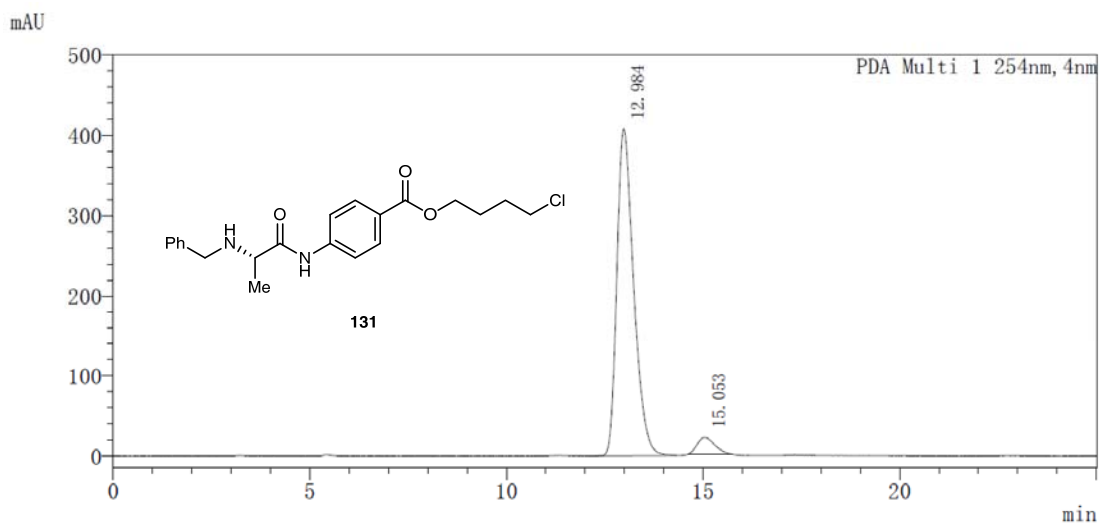

Peak Table

PDA Ch1 254nm

| Peak# | Ret. Time | Area     | Area%  |
|-------|-----------|----------|--------|
| 1     | 12.984    | 12109689 | 94.832 |
| 2     | 15.053    | 659955   | 5.168  |

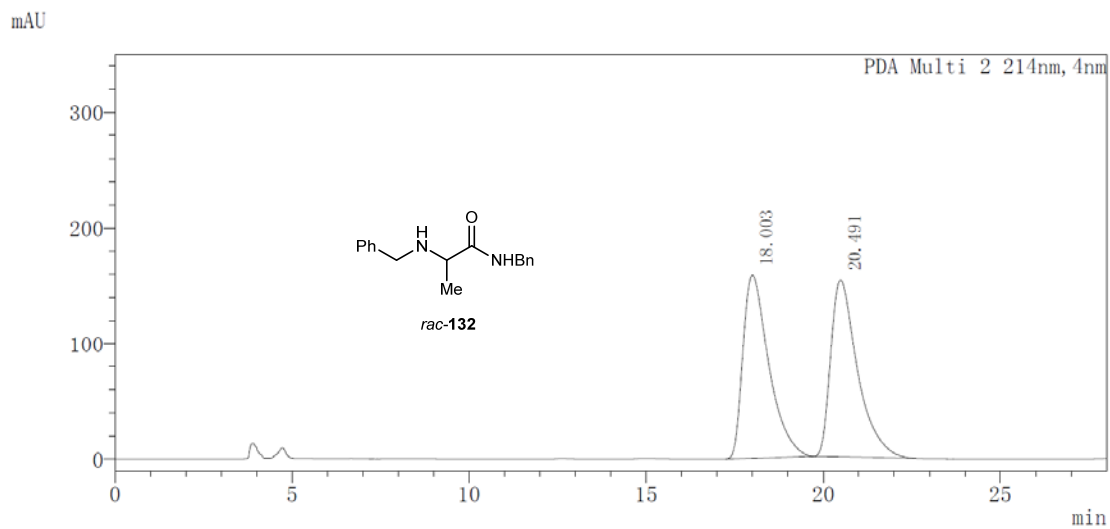

Peak Table

PDA Ch2 214nm

| Peak# | Ret. Time | Area    | Area%  |
|-------|-----------|---------|--------|
| 1     | 18.003    | 8072380 | 50.076 |
| 2     | 20.491    | 8047774 | 49.924 |

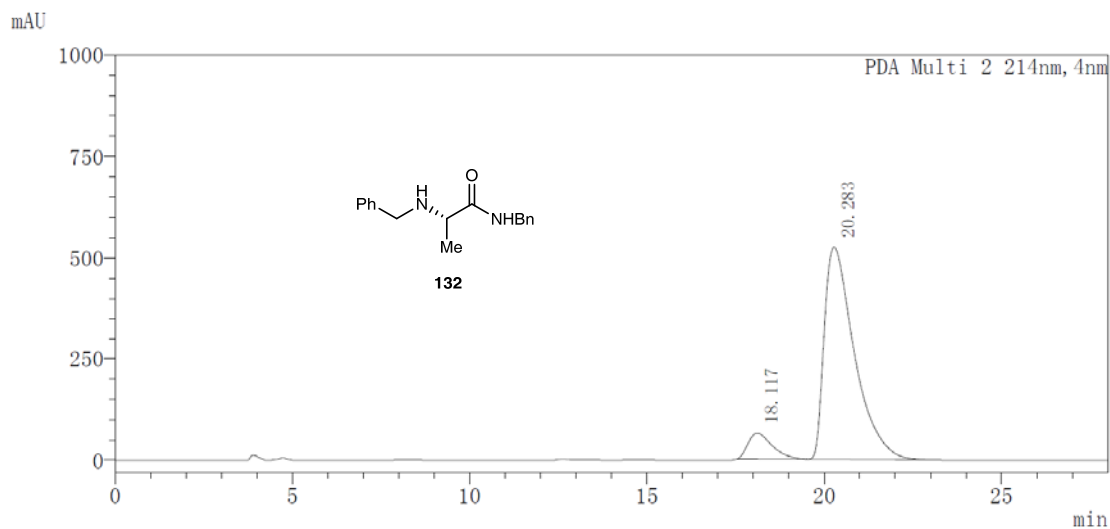

Peak Table

PDA Ch2 214nm

| Peak# | Ret. Time | Area     | Area%  |
|-------|-----------|----------|--------|
| 1     | 18.117    | 3053021  | 8.944  |
| 2     | 20.283    | 31081739 | 91.056 |

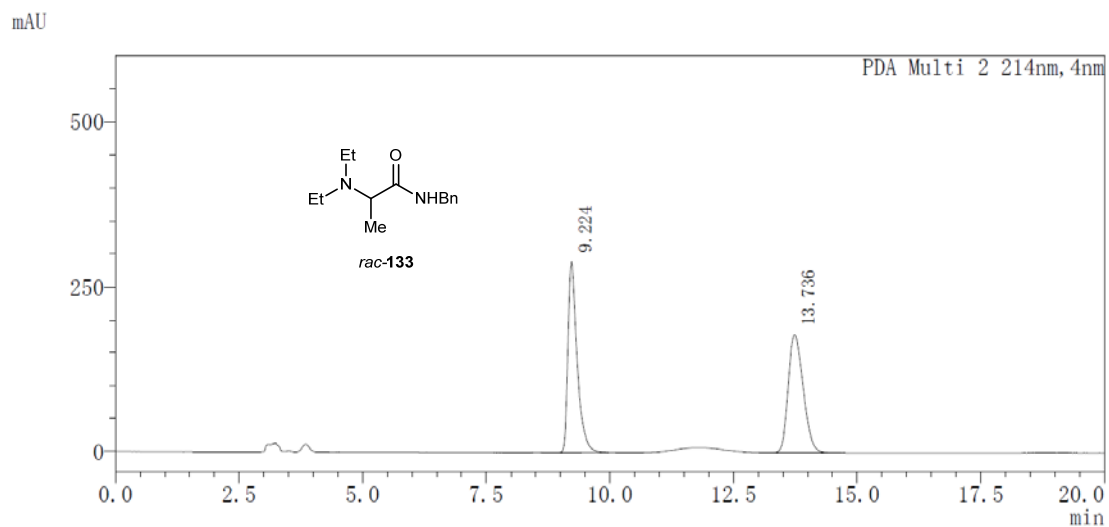

Peak Table

PDA Ch2 214nm

| Peak# | Ret. Time | Area    | Area%  |
|-------|-----------|---------|--------|
| 1     | 9.224     | 3751888 | 49.772 |
| 2     | 13.736    | 3786262 | 50.228 |

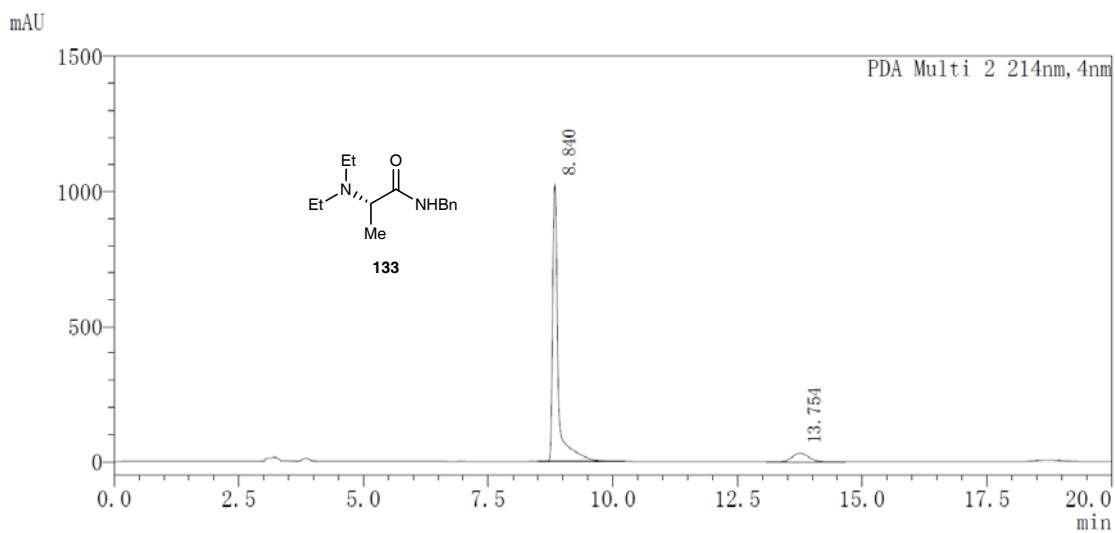

Peak Table

PDA Ch2 214nm

| Peak# | Ret. Time | Area    | Area%  |
|-------|-----------|---------|--------|
| 1     | 8.840     | 8073122 | 91.777 |
| 2     | 13.754    | 723302  | 8.223  |

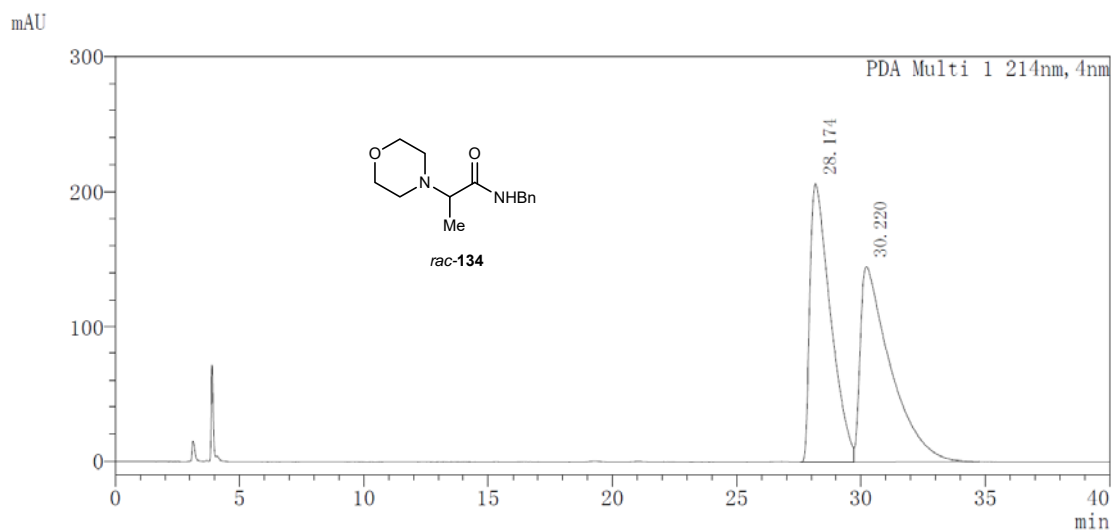

Peak Table

PDA Ch1 214nm

| Peak# | Ret. Time | Area     | Area%  |
|-------|-----------|----------|--------|
| 1     | 28.174    | 11856948 | 49.287 |
| 2     | 30.220    | 12199942 | 50.713 |

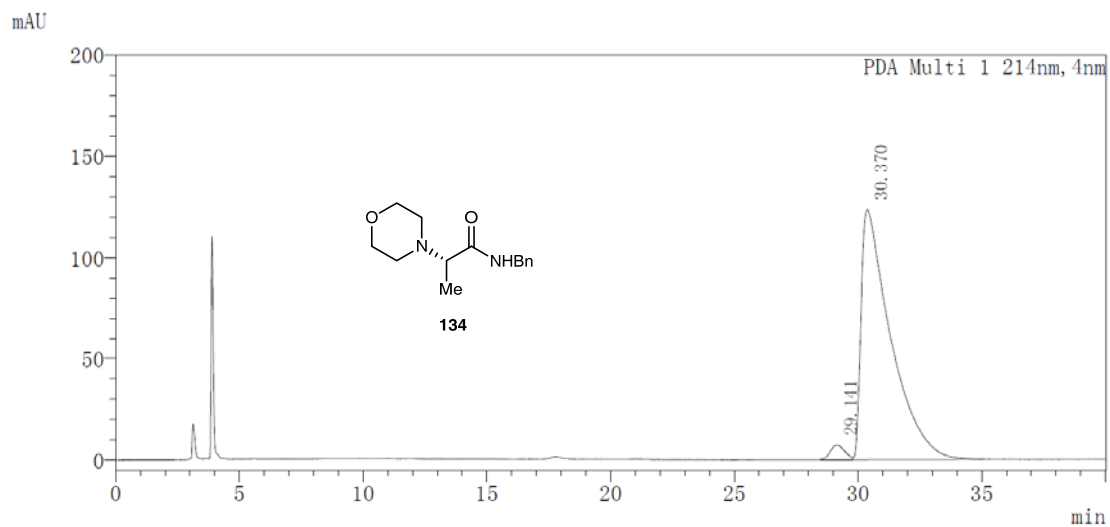

Peak Table

PDA Ch1 214nm

| Peak# | Ret. Time | Area     | Area%  |
|-------|-----------|----------|--------|
| 1     | 29.141    | 291198   | 2.769  |
| 2     | 30.370    | 10223566 | 97.231 |

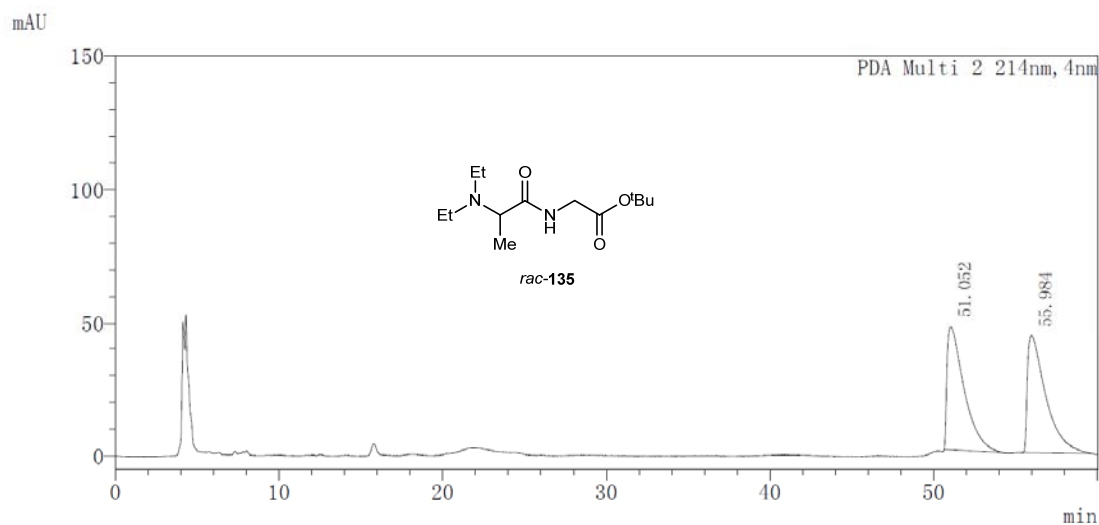

Peak Table

PDA Ch2 214nm

| Peak# | Ret. Time | Area    | Area%  |
|-------|-----------|---------|--------|
| 1     | 51.052    | 3350636 | 49.454 |
| 2     | 55.984    | 3424688 | 50.546 |

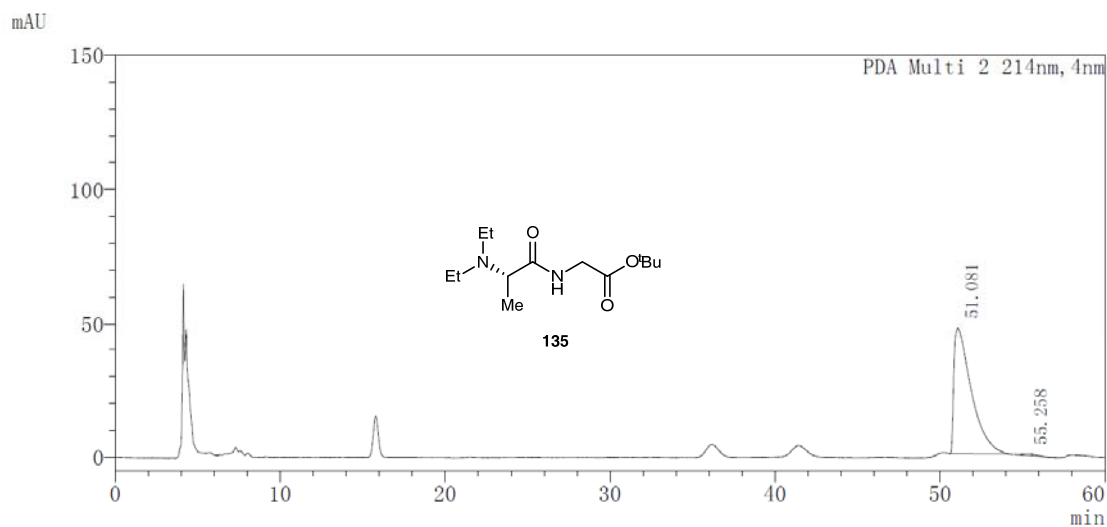

Peak Table

PDA Ch2 214nm

| Peak# | Ret. Time | Area    | Area%  |
|-------|-----------|---------|--------|
| 1     | 51.081    | 3446560 | 98.988 |
| 2     | 55.258    | 35228   | 1.012  |

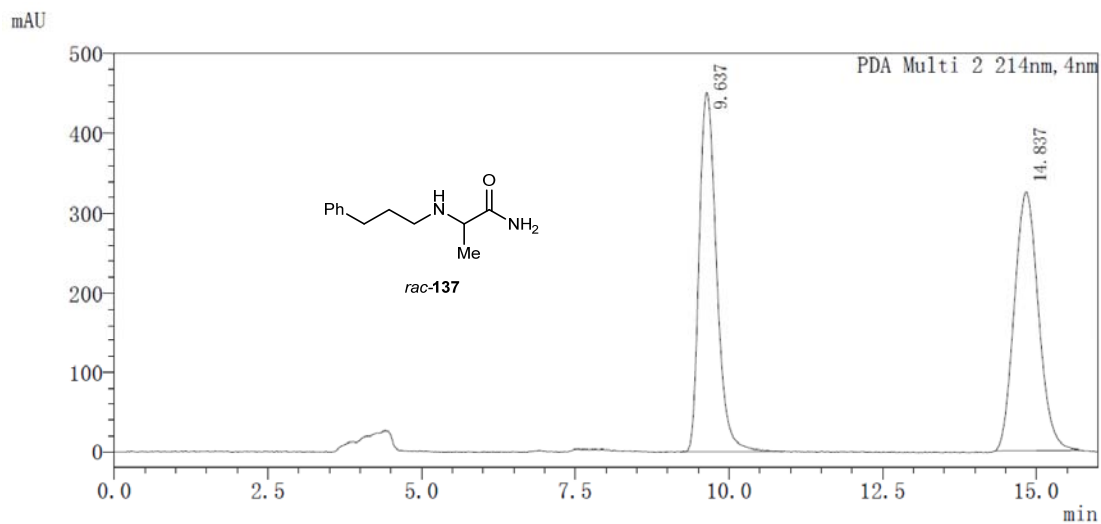

Peak Table

PDA Ch2 214nm

| Peak# | Ret. Time | Area    | Area%  |
|-------|-----------|---------|--------|
| 1     | 9.637     | 8867147 | 49.908 |
| 2     | 14.837    | 8899989 | 50.092 |

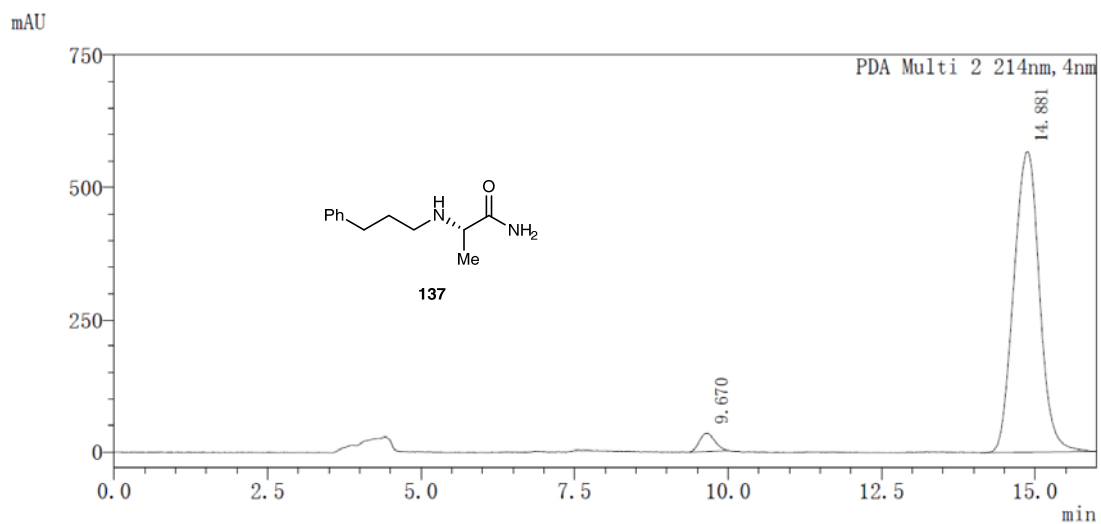

Peak Table

PDA Ch2 214nm

| Peak# | Ret. Time | Area     | Area%  |
|-------|-----------|----------|--------|
| 1     | 9.670     | 593287   | 3.462  |
| 2     | 14.881    | 16545409 | 96.538 |

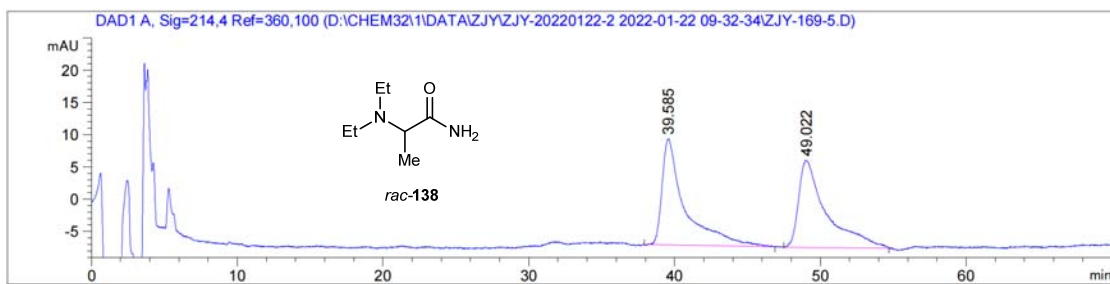

Signal 1: DAD1 A, Sig=214,4 Ref=360,100

| Peak # | RetTime [min] | Type | Width [min] | Area [mAU*s] | Height [mAU] | Area %  |
|--------|---------------|------|-------------|--------------|--------------|---------|
| 1      | 39.585        | MM R | 1.8124      | 1787.79822   | 16.44020     | 50.1063 |
| 2      | 49.022        | MM R | 2.1976      | 1780.21301   | 13.50120     | 49.8937 |

Totals : 3568.01123 29.94140

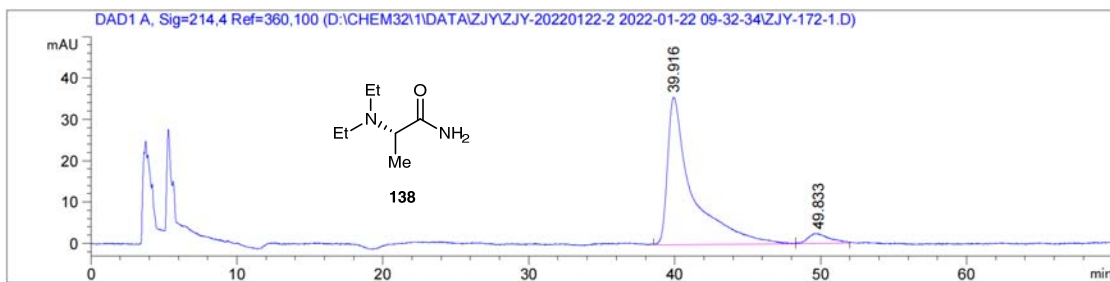

Signal 1: DAD1 A, Sig=214,4 Ref=360,100

| Peak # | RetTime [min] | Type | Width [min] | Area [mAU*s] | Height [mAU] | Area %  |
|--------|---------------|------|-------------|--------------|--------------|---------|
| 1      | 39.916        | MM R | 1.9650      | 4200.82959   | 35.63101     | 94.2319 |
| 2      | 49.833        | MM R | 1.7445      | 257.13928    | 2.45670      | 5.7681  |

Totals : 4457.96887 38.08771

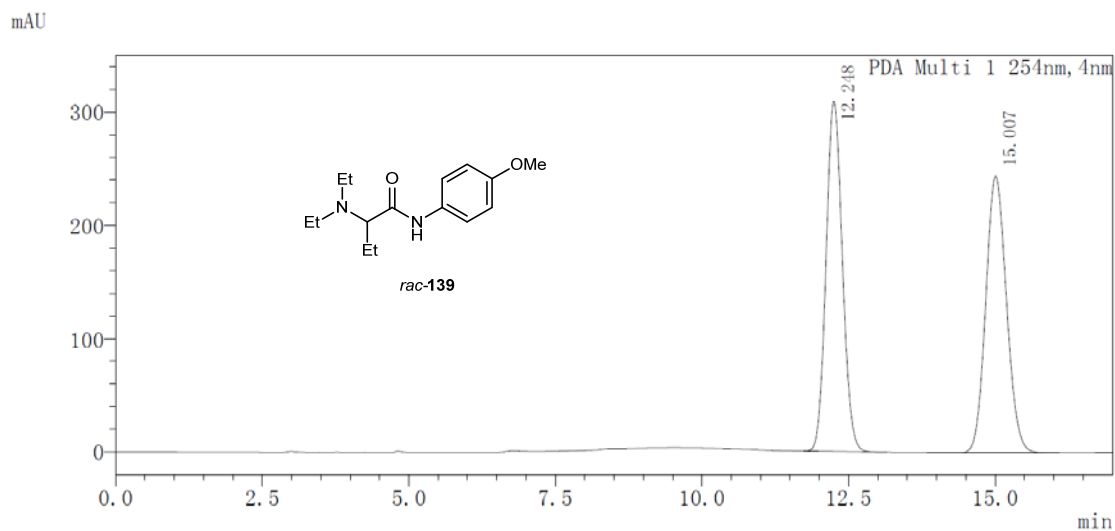

Peak Table

PDA Ch1 254nm

| Peak# | Ret. Time | Area    | Area%  |
|-------|-----------|---------|--------|
| 1     | 12.248    | 5992871 | 49.962 |
| 2     | 15.007    | 6001912 | 50.038 |

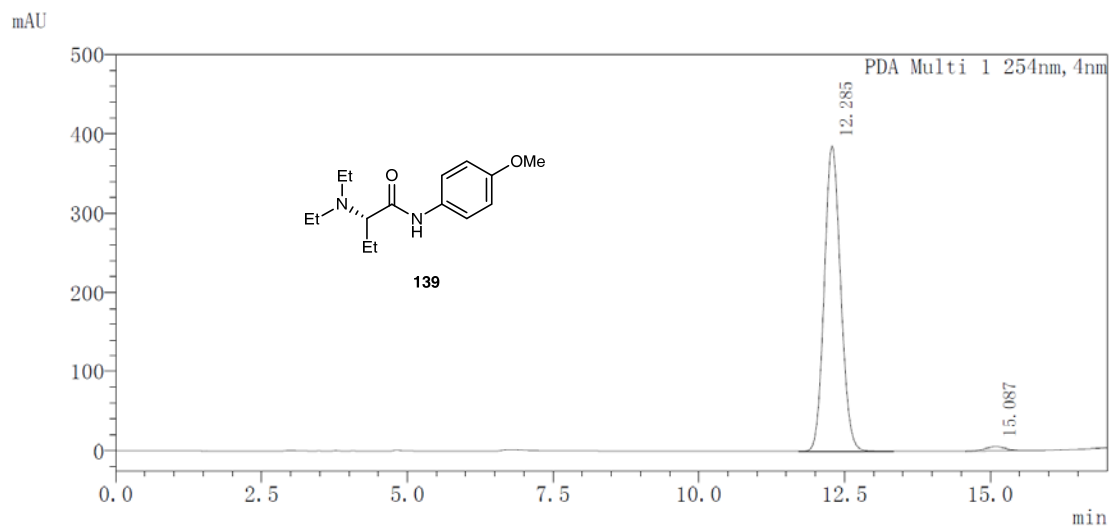

Peak Table

PDA Ch1 254nm

| Peak# | Ret. Time | Area    | Area%  |
|-------|-----------|---------|--------|
| 1     | 12.285    | 7508808 | 98.322 |
| 2     | 15.087    | 128125  | 1.678  |



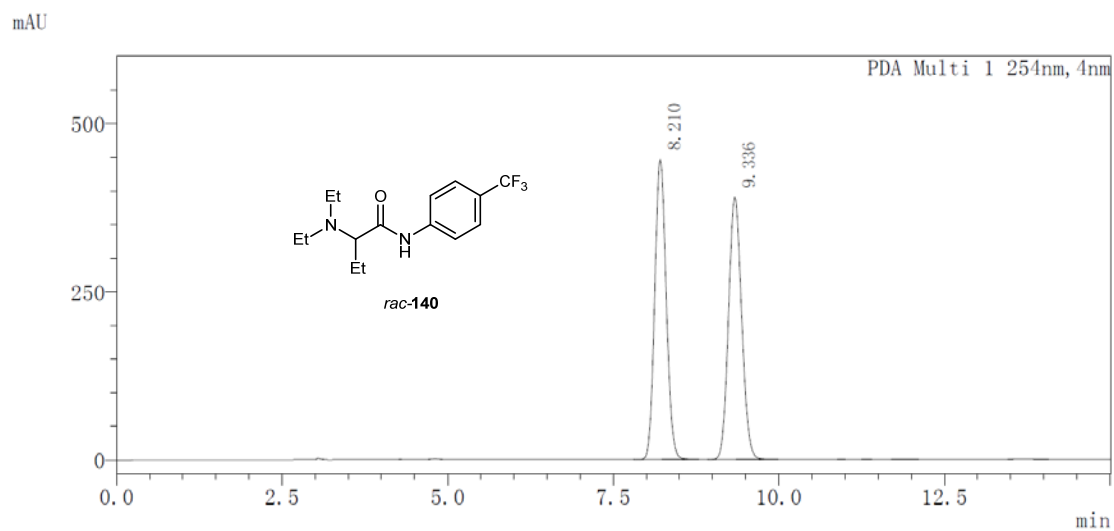

Peak Table

PDA Ch1 254nm

| Peak# | Ret. Time | Area    | Area%  |
|-------|-----------|---------|--------|
| 1     | 8.210     | 5382335 | 49.999 |
| 2     | 9.336     | 5382606 | 50.001 |

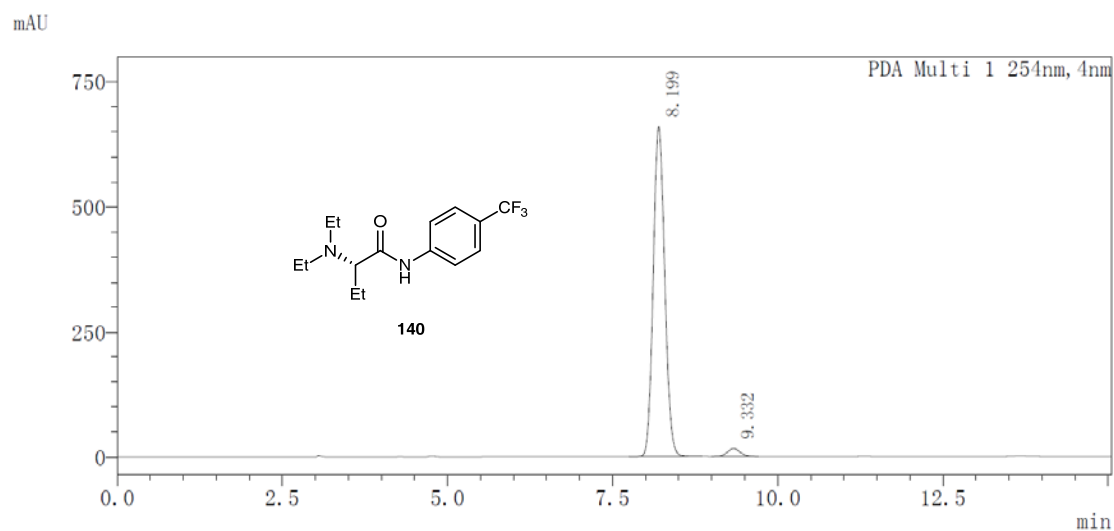

Peak Table

PDA Ch1 254nm

| Peak# | Ret. Time | Area    | Area%  |
|-------|-----------|---------|--------|
| 1     | 8.199     | 7989718 | 97.283 |
| 2     | 9.332     | 223170  | 2.717  |

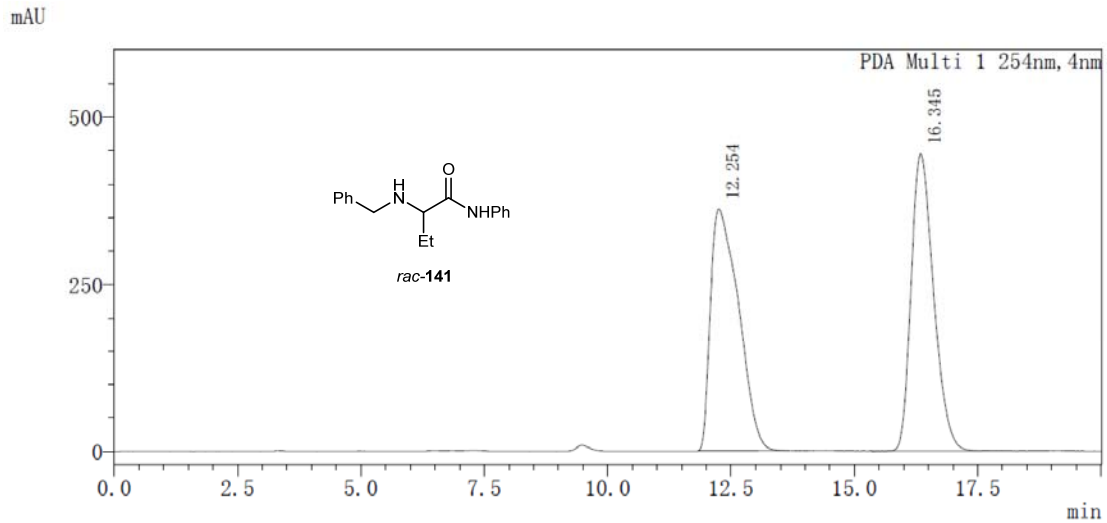

Peak Table

PDA Ch1 254nm

| Peak# | Ret. Time | Area     | Area%  |
|-------|-----------|----------|--------|
| 1     | 12.254    | 14334218 | 50.382 |
| 2     | 16.345    | 14117025 | 49.618 |

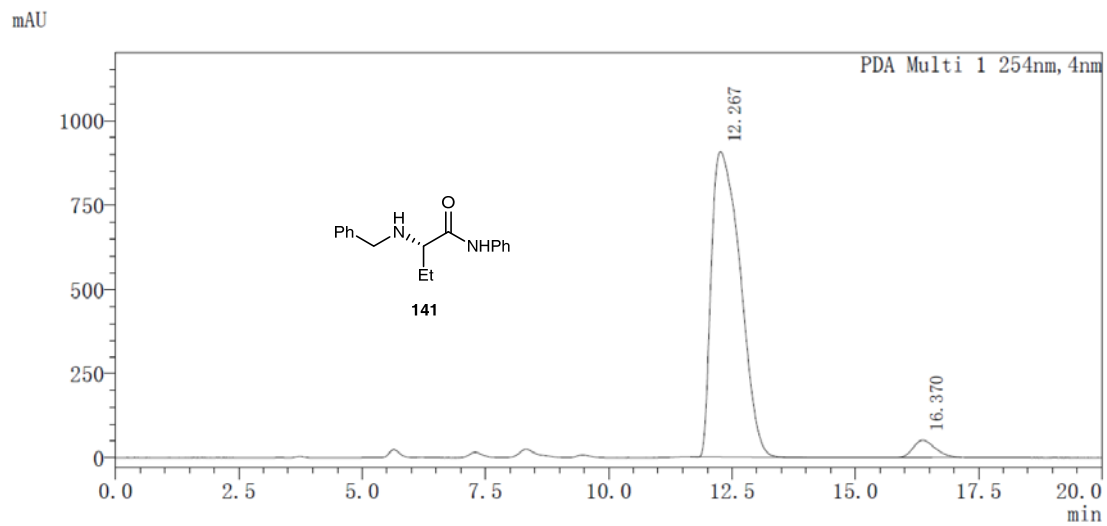

Peak Table

PDA Ch1 254nm

| Peak# | Ret. Time | Area     | Area%  |
|-------|-----------|----------|--------|
| 1     | 12.267    | 36887854 | 95.827 |
| 2     | 16.370    | 1606405  | 4.173  |

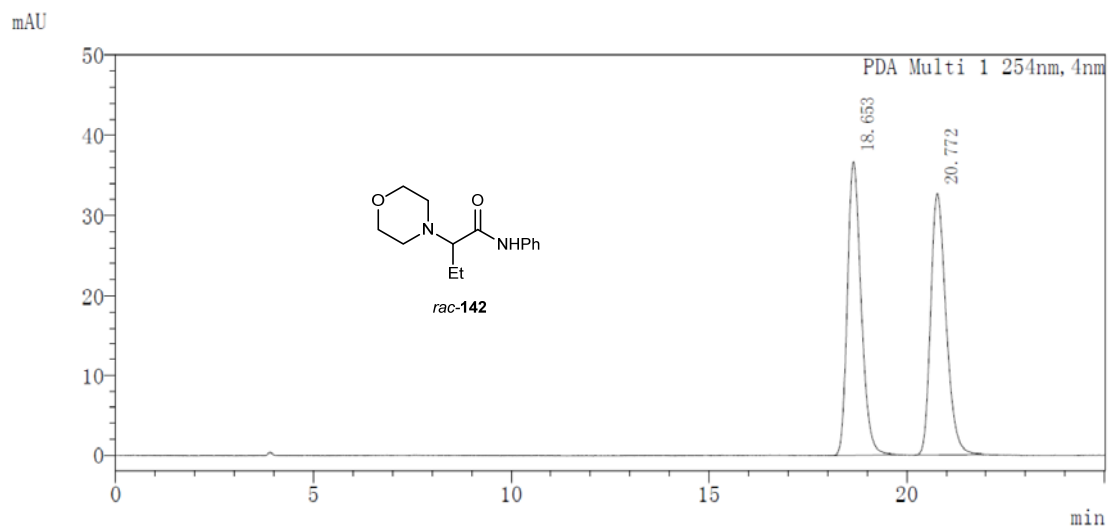

Peak Table

PDA Ch1 254nm

| Peak# | Ret. Time | Area   | Area%  |
|-------|-----------|--------|--------|
| 1     | 18.653    | 886895 | 50.058 |
| 2     | 20.772    | 884834 | 49.942 |

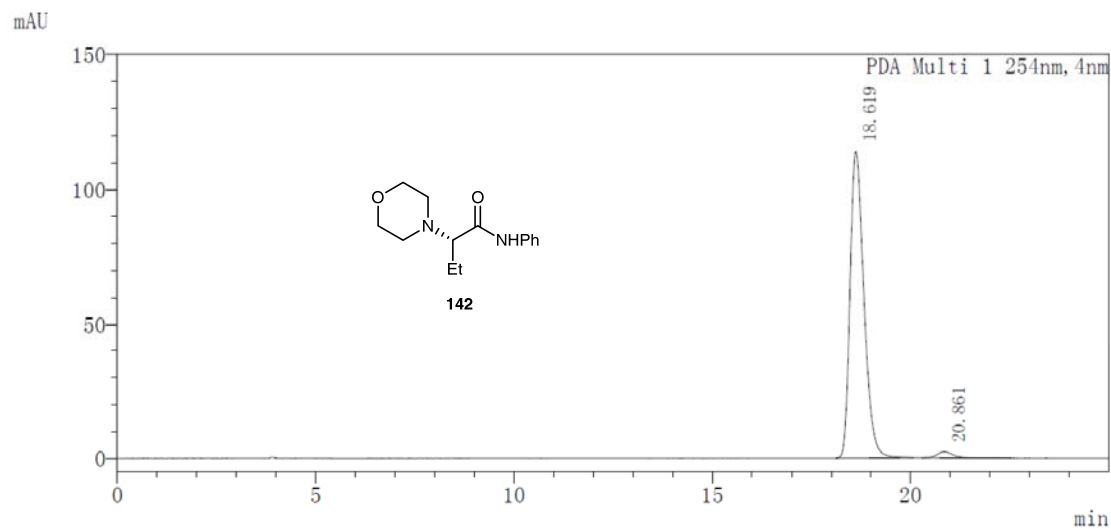

Peak Table

PDA Ch1 254nm

| Peak# | Ret. Time | Area    | Area%  |
|-------|-----------|---------|--------|
| 1     | 18.619    | 2777199 | 97.860 |
| 2     | 20.861    | 60725   | 2.140  |

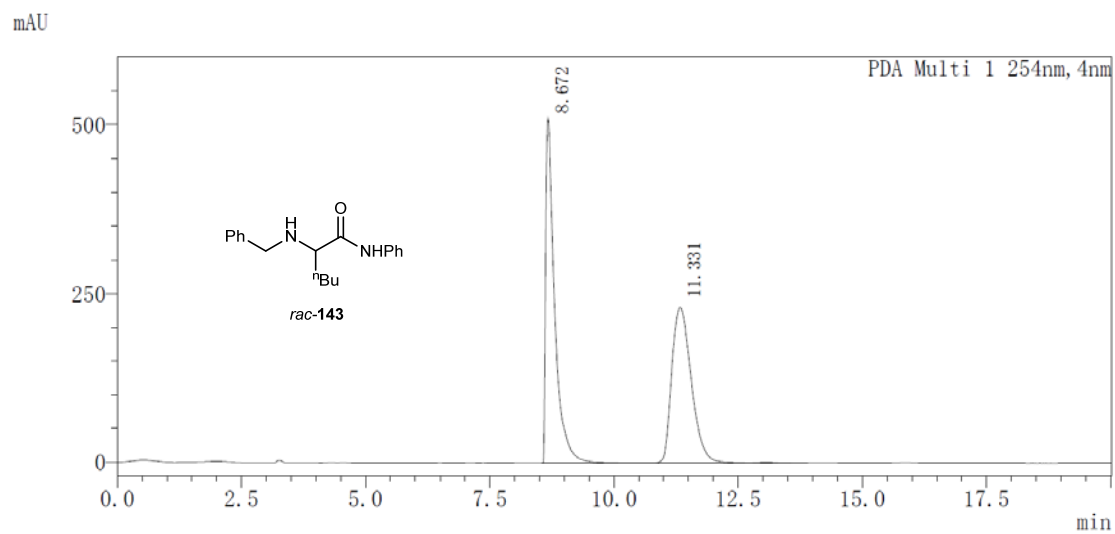

Peak Table

PDA Ch1 254nm

| Peak# | Ret. Time | Area    | Area%  |
|-------|-----------|---------|--------|
| 1     | 8.672     | 6443380 | 50.390 |
| 2     | 11.331    | 6343609 | 49.610 |

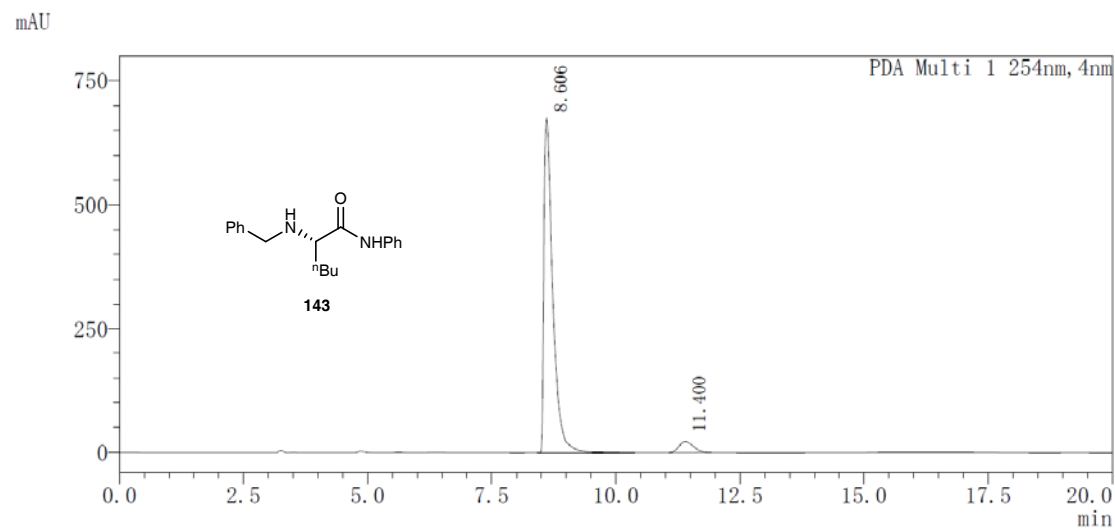

Peak Table

PDA Ch1 254nm

| Peak# | Ret. Time | Area    | Area%  |
|-------|-----------|---------|--------|
| 1     | 8.606     | 8421873 | 95.042 |
| 2     | 11.400    | 439341  | 4.958  |

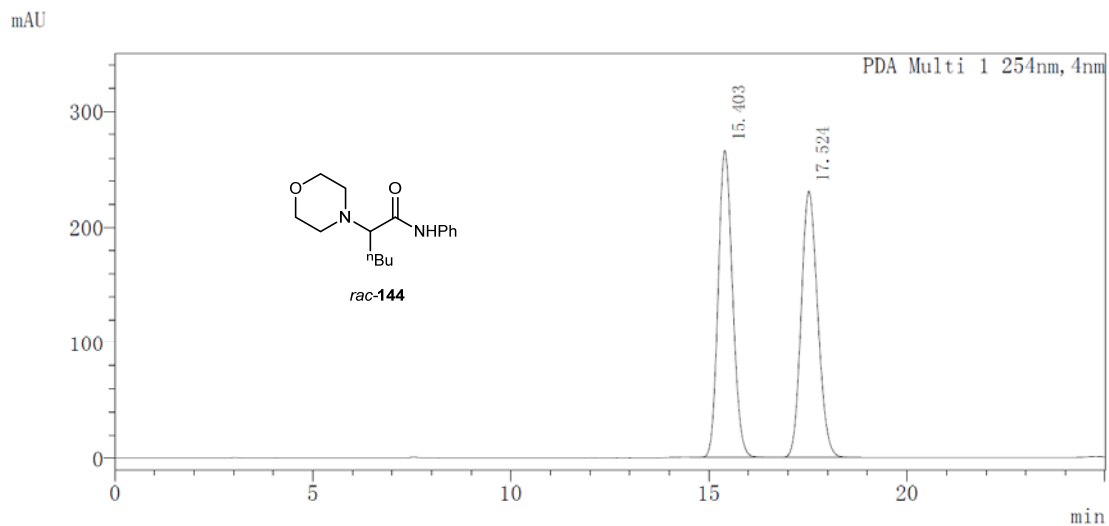

Peak Table

PDA Ch1 254nm

| Peak# | Ret. Time | Area    | Area%  |
|-------|-----------|---------|--------|
| 1     | 15.403    | 6683462 | 49.967 |
| 2     | 17.524    | 6692418 | 50.033 |

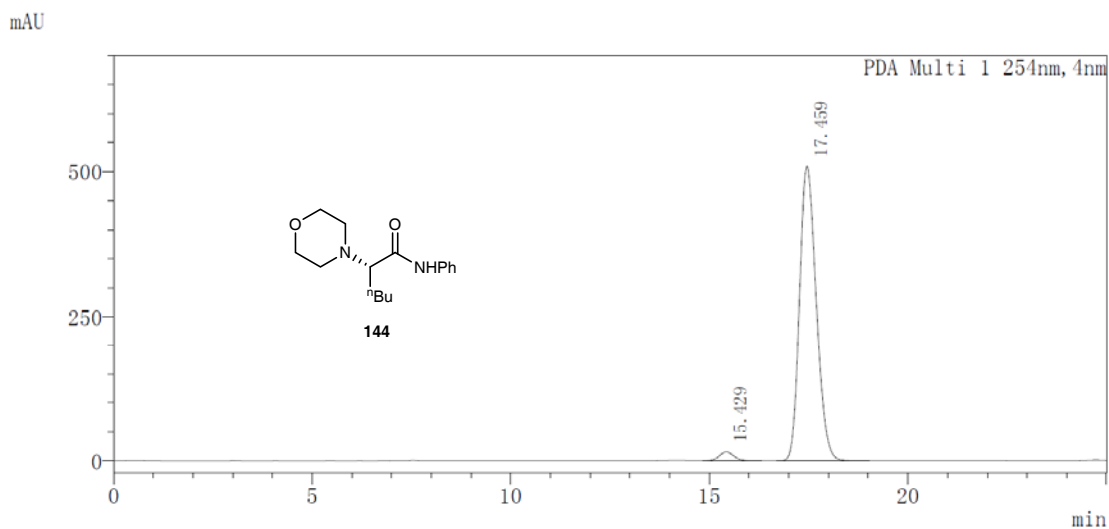

Peak Table

PDA Ch1 254nm

| Peak# | Ret. Time | Area     | Area%  |
|-------|-----------|----------|--------|
| 1     | 15.429    | 375250   | 2.459  |
| 2     | 17.459    | 14884556 | 97.541 |

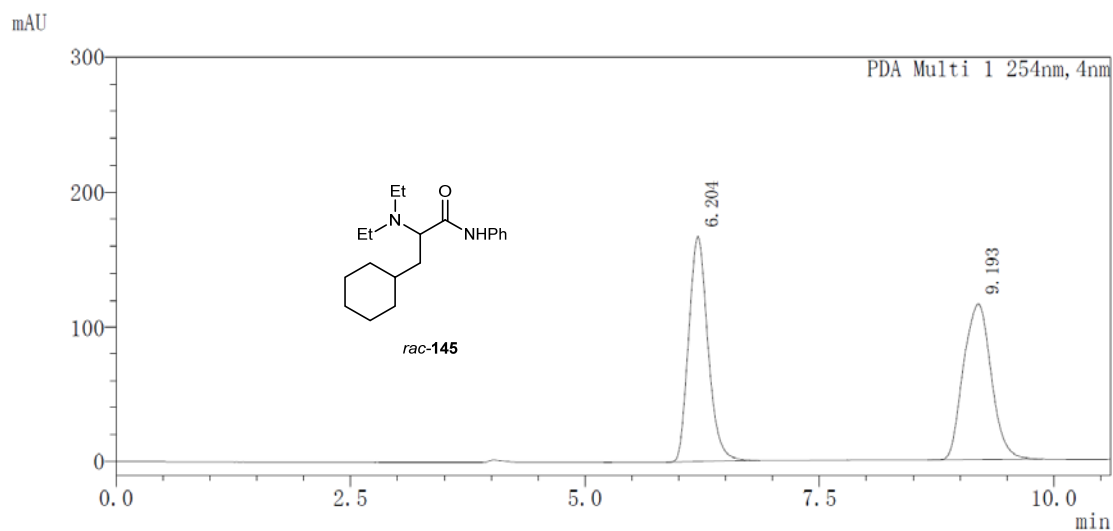

Peak Table

PDA Ch1 254nm

| Peak# | Ret. Time | Area    | Area%  |
|-------|-----------|---------|--------|
| 1     | 6.204     | 2389889 | 50.006 |
| 2     | 9.193     | 2389314 | 49.994 |

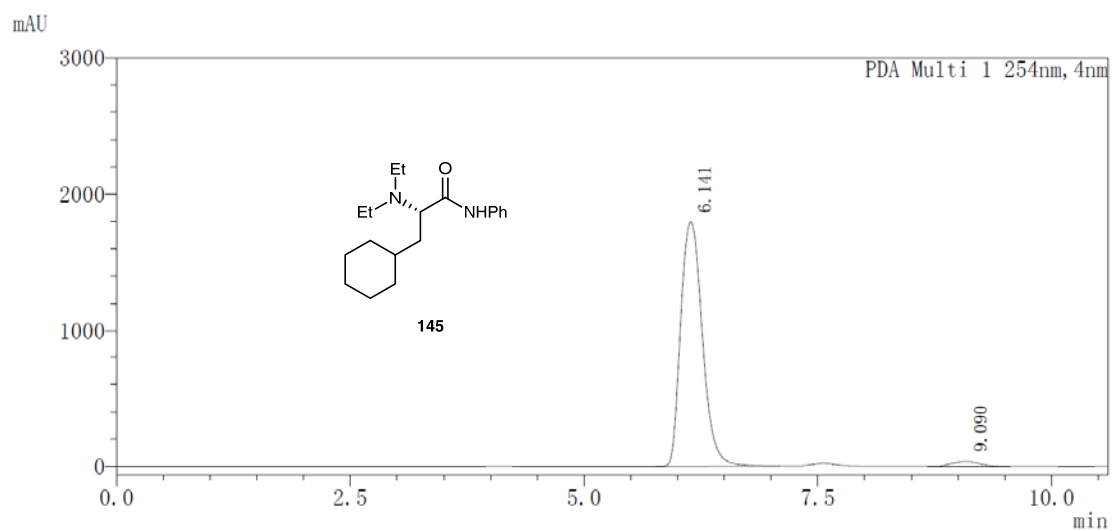

Peak Table

PDA Ch1 254nm

| Peak# | Ret. Time | Area     | Area%  |
|-------|-----------|----------|--------|
| 1     | 6.141     | 28961799 | 97.614 |
| 2     | 9.090     | 708034   | 2.386  |

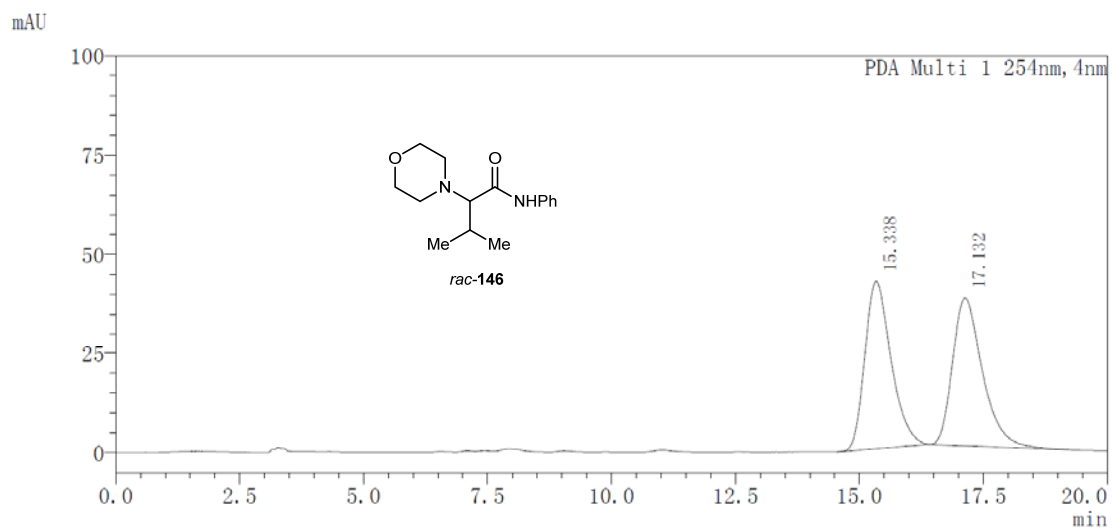

Peak Table

PDA Ch1 254nm

| Peak# | Ret. Time | Area    | Area%  |
|-------|-----------|---------|--------|
| 1     | 15.338    | 1558062 | 49.822 |
| 2     | 17.132    | 1569164 | 50.178 |

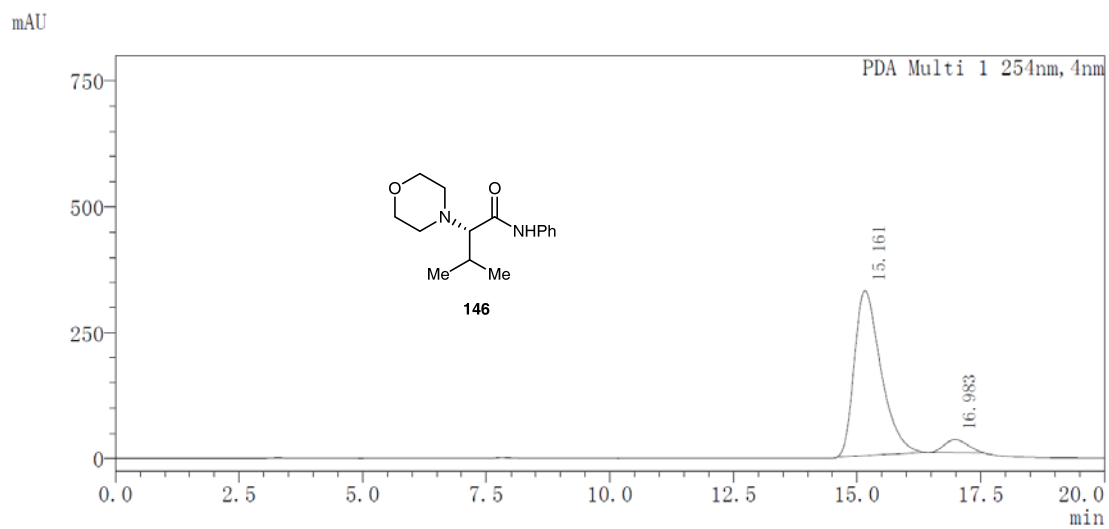

Peak Table

PDA Ch1 254nm

| Peak# | Ret. Time | Area     | Area%  |
|-------|-----------|----------|--------|
| 1     | 15.161    | 12303889 | 93.664 |
| 2     | 16.983    | 832328   | 6.336  |

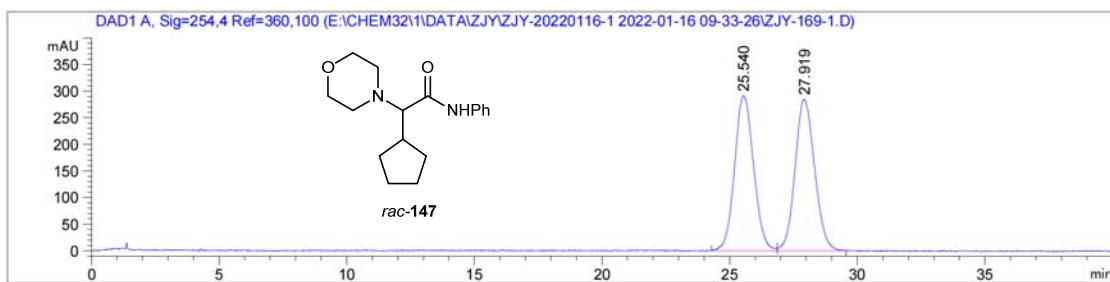

Signal 1: DAD1 A, Sig=254,4 Ref=360,100

| Peak # | RetTime [min] | Type | Width [min] | Area [mAU*s] | Height [mAU] | Area %  |
|--------|---------------|------|-------------|--------------|--------------|---------|
| 1      | 25.540        | VV R | 0.6187      | 1.50610e4    | 291.30521    | 49.9141 |
| 2      | 27.919        | VV R | 0.6523      | 1.51128e4    | 284.23712    | 50.0859 |

Totals : 3.01737e4 575.54233

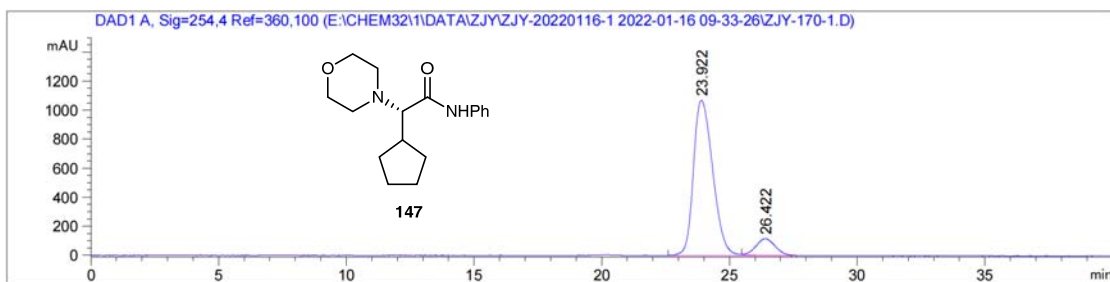

Signal 1: DAD1 A, Sig=254,4 Ref=360,100

| Peak # | RetTime [min] | Type | Width [min] | Area [mAU*s] | Height [mAU] | Area %  |
|--------|---------------|------|-------------|--------------|--------------|---------|
| 1      | 23.922        | VV R | 0.6298      | 5.60670e4    | 1068.59143   | 90.3760 |
| 2      | 26.422        | VV E | 0.6142      | 5970.45557   | 115.28724    | 9.6240  |

Totals : 6.20375e4 1183.87867



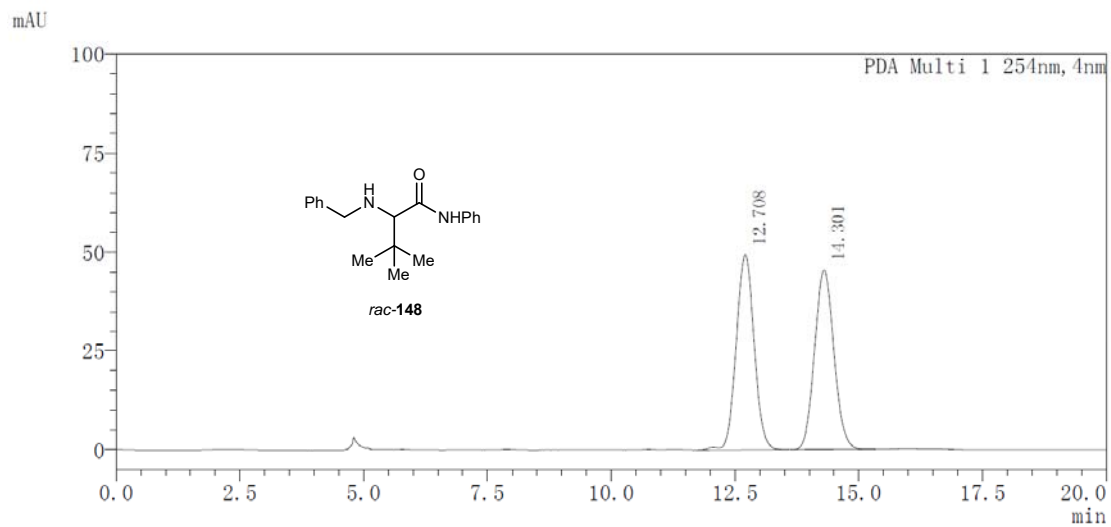

Peak Table

PDA Ch1 254nm

| Peak# | Ret. Time | Area    | Area%  |
|-------|-----------|---------|--------|
| 1     | 12.708    | 1248778 | 50.250 |
| 2     | 14.301    | 1236352 | 49.750 |

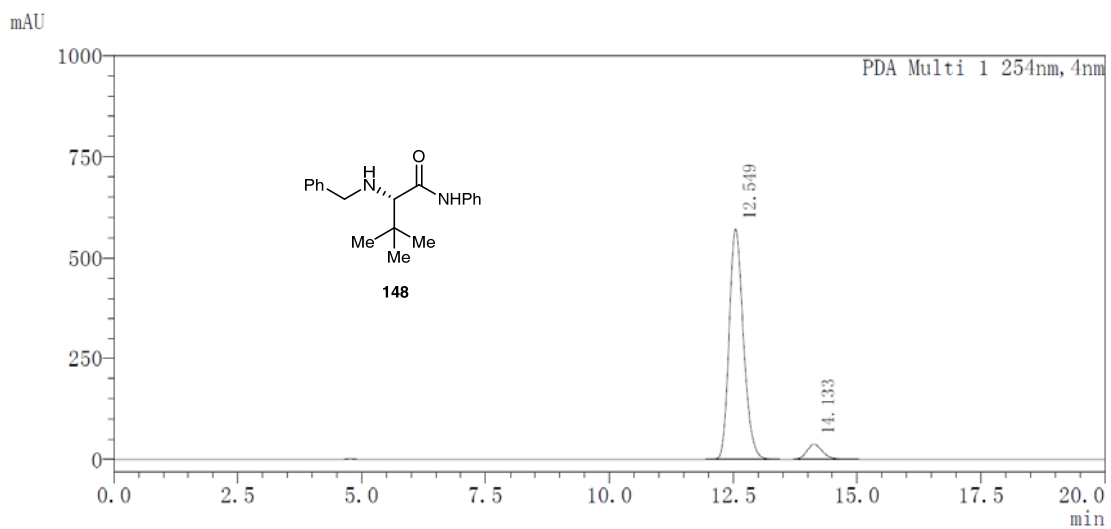

Peak Table

PDA Ch1 254nm

| Peak# | Ret. Time | Area     | Area%  |
|-------|-----------|----------|--------|
| 1     | 12.549    | 11425235 | 93.386 |
| 2     | 14.133    | 809150   | 6.614  |

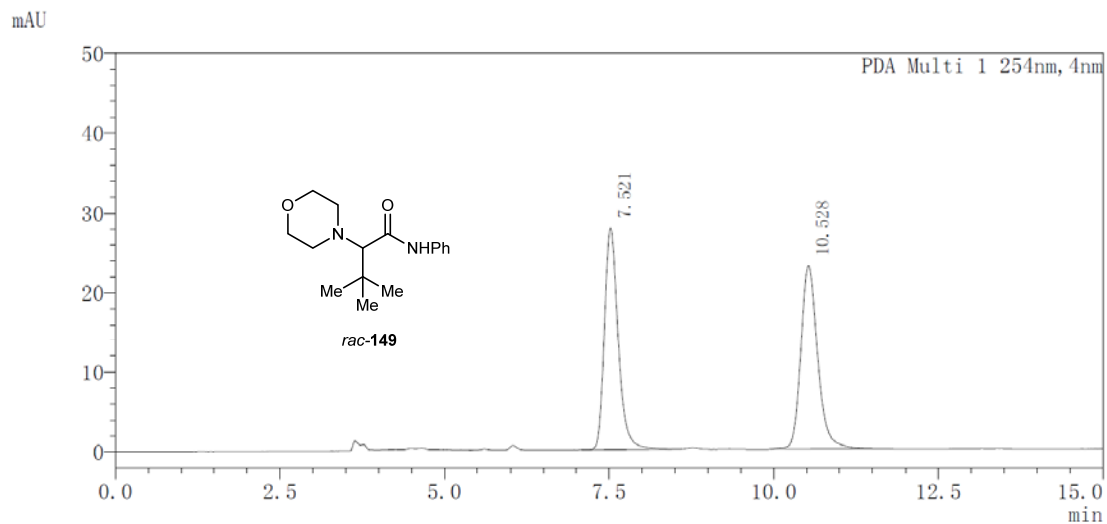

Peak Table

PDA Ch1 254nm

| Peak# | Ret. Time | Area   | Area%  |
|-------|-----------|--------|--------|
| 1     | 7.521     | 405170 | 49.629 |
| 2     | 10.528    | 411226 | 50.371 |

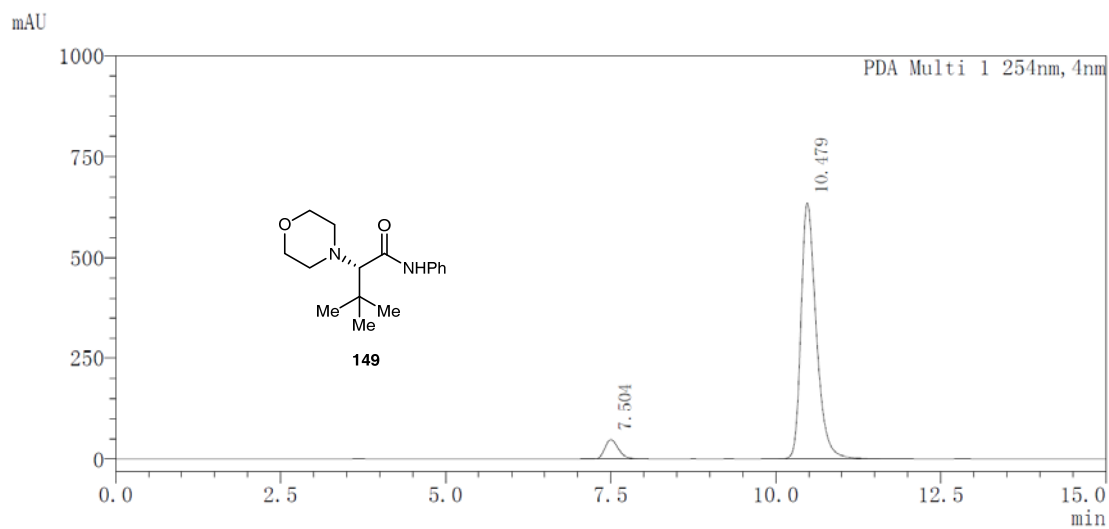

Peak Table

PDA Ch1 254nm

| Peak# | Ret. Time | Area     | Area%  |
|-------|-----------|----------|--------|
| 1     | 7.504     | 699637   | 6.421  |
| 2     | 10.479    | 10196538 | 93.579 |

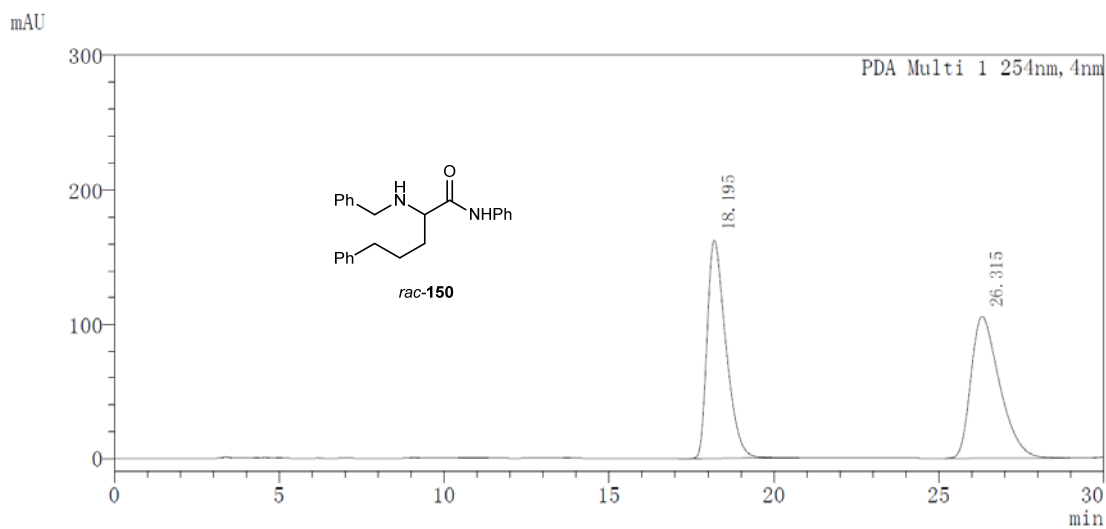

Peak Table

PDA Ch1 254nm

| Peak# | Ret. Time | Area    | Area%  |
|-------|-----------|---------|--------|
| 1     | 18.195    | 6399270 | 50.022 |
| 2     | 26.315    | 6393727 | 49.978 |

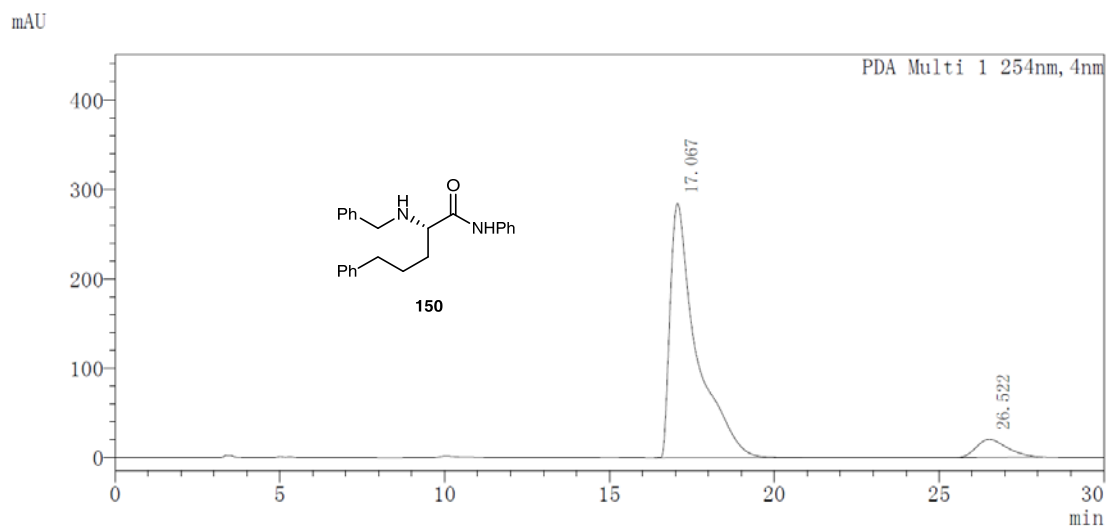

Peak Table

PDA Ch1 254nm

| Peak# | Ret. Time | Area     | Area%  |
|-------|-----------|----------|--------|
| 1     | 17.067    | 15897674 | 92.571 |
| 2     | 26.522    | 1275830  | 7.429  |

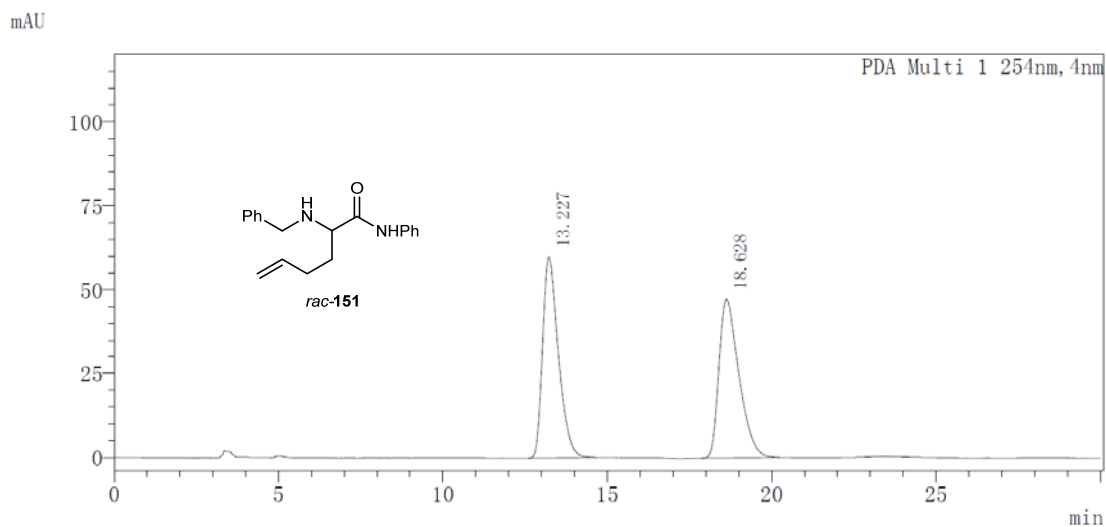

Peak Table

PDA Ch1 254nm

| Peak# | Ret. Time | Area    | Area%  |
|-------|-----------|---------|--------|
| 1     | 13.227    | 1993921 | 49.965 |
| 2     | 18.628    | 1996734 | 50.035 |

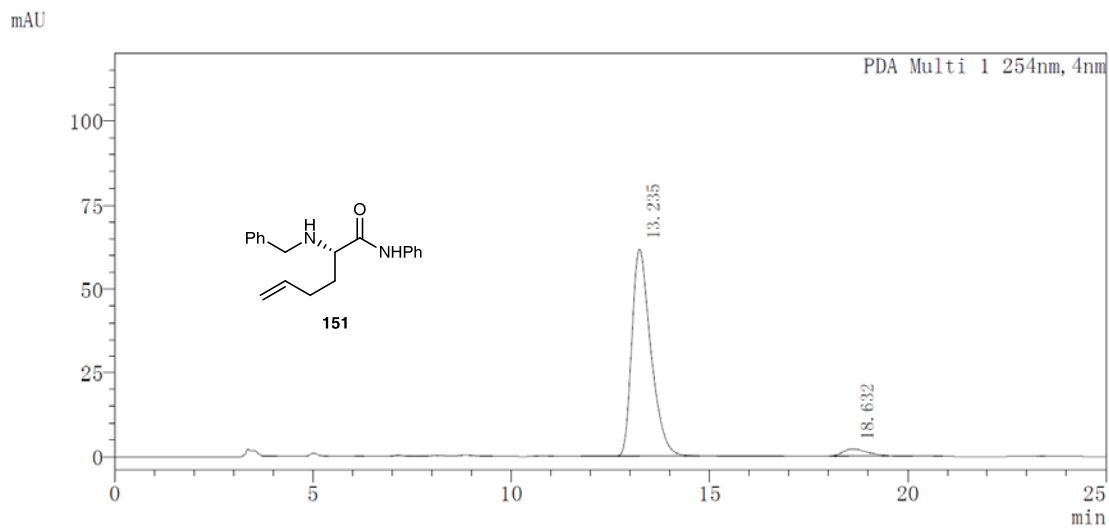

Peak Table

PDA Ch1 254nm

| Peak# | Ret. Time | Area    | Area%  |
|-------|-----------|---------|--------|
| 1     | 13.235    | 2043468 | 96.142 |
| 2     | 18.632    | 82003   | 3.858  |

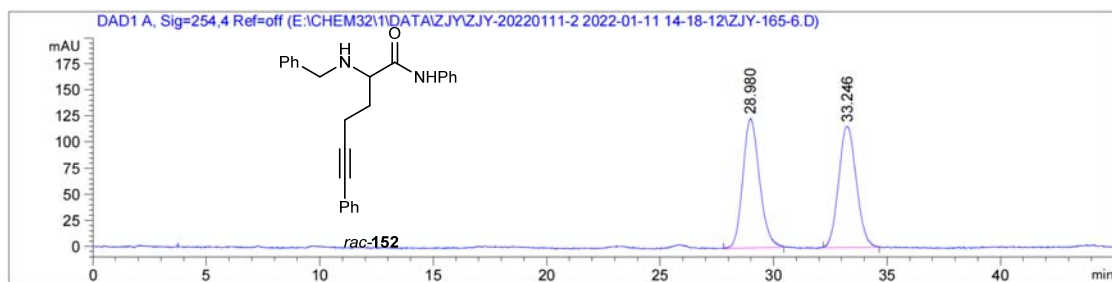

Signal 1: DAD1 A, Sig=254,4 Ref=off

| Peak # | RetTime [min] | Type | Width [min] | Area [mAU*s] | Height [mAU] | Area %  |
|--------|---------------|------|-------------|--------------|--------------|---------|
| 1      | 28.980        | VV R | 0.6027      | 6350.08594   | 124.04106    | 50.2241 |
| 2      | 33.246        | VV R | 0.6433      | 6293.41260   | 115.82341    | 49.7759 |

Totals : 1.26435e4 239.86447

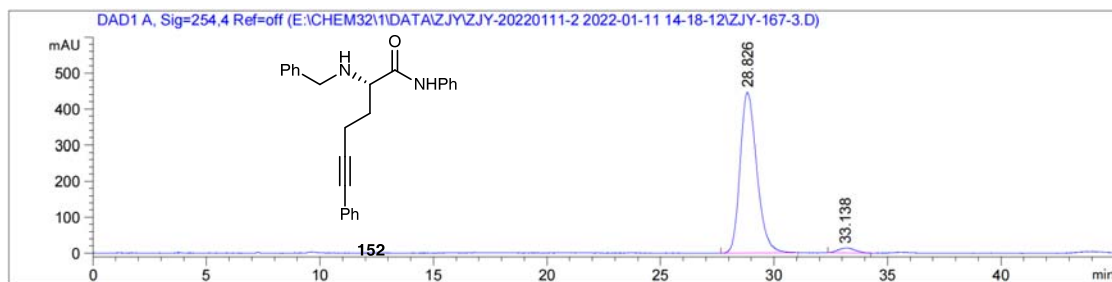

Signal 1: DAD1 A, Sig=254,4 Ref=off

| Peak # | RetTime [min] | Type | Width [min] | Area [mAU*s] | Height [mAU] | Area %  |
|--------|---------------|------|-------------|--------------|--------------|---------|
| 1      | 28.826        | MM R | 0.8507      | 2.27975e4    | 446.64435    | 96.8208 |
| 2      | 33.138        | MM R | 0.8715      | 748.56732    | 14.31623     | 3.1792  |

Totals : 2.35461e4 460.96057

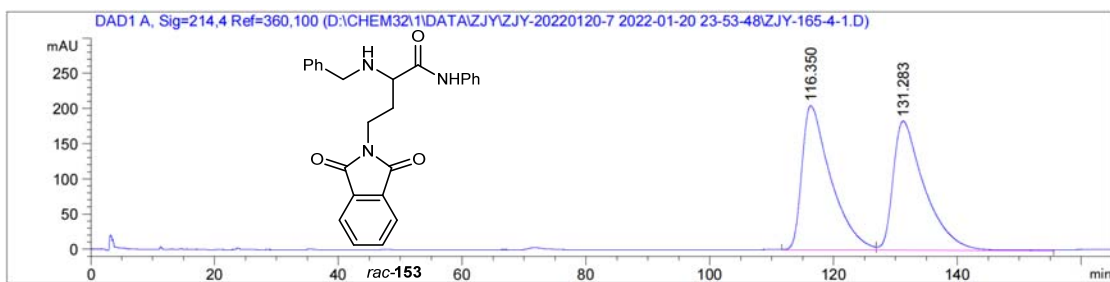

Signal 1: DAD1 A, Sig=214,4 Ref=360,100

| Peak # | RetTime [min] | Type | Width [min] | Area [mAU*s] | Height [mAU] | Area %  |
|--------|---------------|------|-------------|--------------|--------------|---------|
| 1      | 116.350       | MF R | 5.3877      | 6.63504e4    | 205.25426    | 50.5108 |
| 2      | 131.283       | FM R | 5.8974      | 6.50083e4    | 183.71950    | 49.4892 |

Totals : 1.31359e5 388.97375

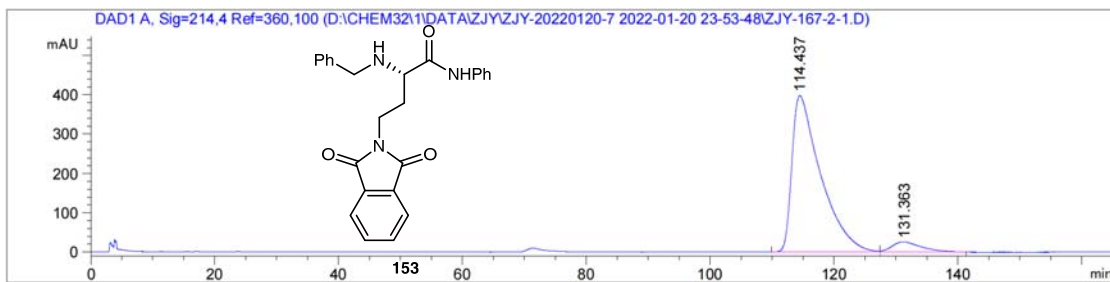

Signal 1: DAD1 A, Sig=214,4 Ref=360,100

| Peak # | RetTime [min] | Type | Width [min] | Area [mAU*s] | Height [mAU] | Area %  |
|--------|---------------|------|-------------|--------------|--------------|---------|
| 1      | 114.437       | MF R | 5.3782      | 1.28339e5    | 397.71045    | 93.8587 |
| 2      | 131.363       | FM R | 5.4602      | 8397.38574   | 25.63233     | 6.1413  |

Totals : 1.36736e5 423.34278

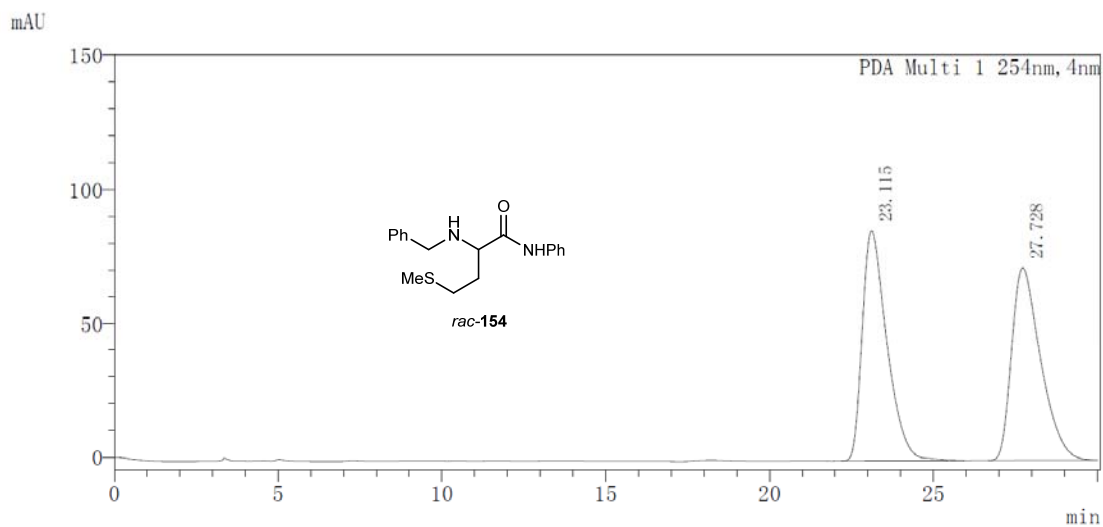

Peak Table

PDA Ch1 254nm

| Peak# | Ret. Time | Area    | Area%  |
|-------|-----------|---------|--------|
| 1     | 23.115    | 4508230 | 50.330 |
| 2     | 27.728    | 4449096 | 49.670 |

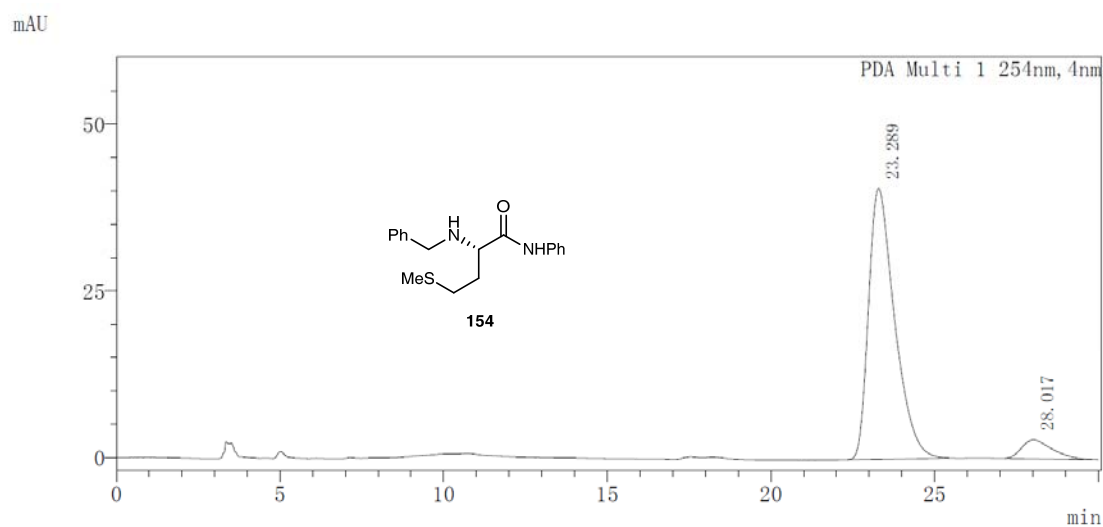

Peak Table

PDA Ch1 254nm

| Peak# | Ret. Time | Area    | Area%  |
|-------|-----------|---------|--------|
| 1     | 23.289    | 2247854 | 92.564 |
| 2     | 28.017    | 180575  | 7.436  |

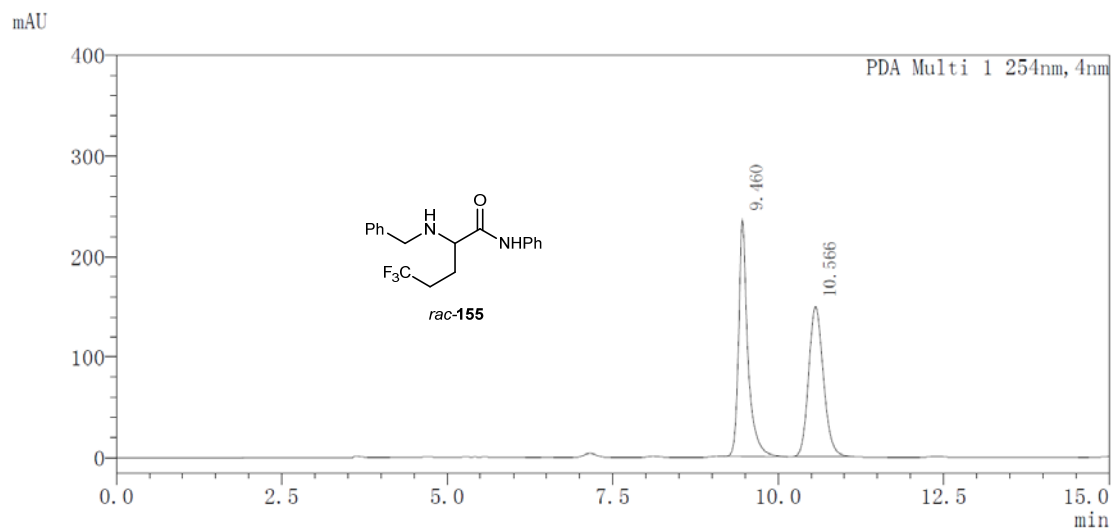

Peak Table

PDA Ch1 254nm

| Peak# | Ret. Time | Area    | Area%  |
|-------|-----------|---------|--------|
| 1     | 9.460     | 2280176 | 49.711 |
| 2     | 10.566    | 2306682 | 50.289 |

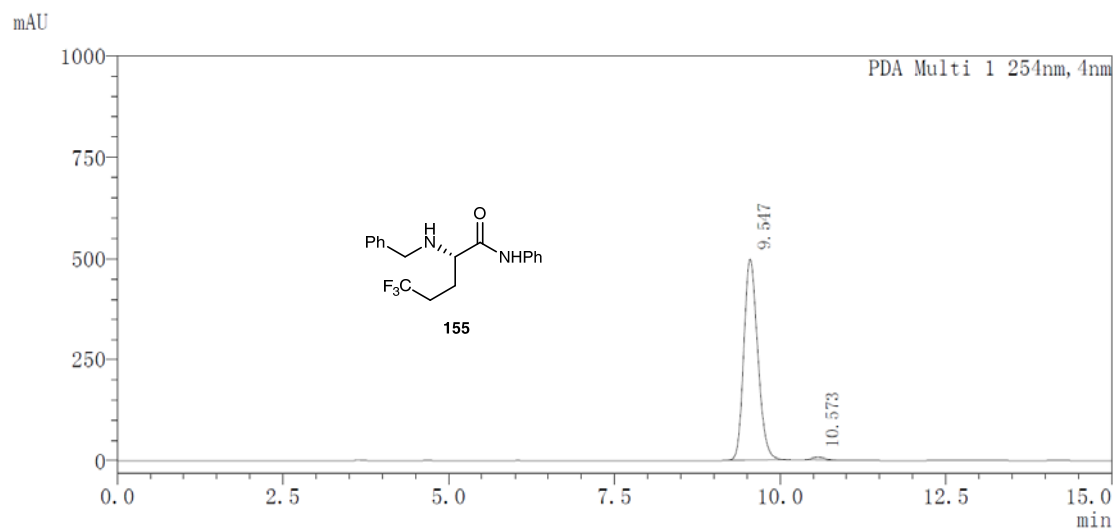

Peak Table

PDA Ch1 254nm

| Peak# | Ret. Time | Area    | Area%  |
|-------|-----------|---------|--------|
| 1     | 9.547     | 7305774 | 98.680 |
| 2     | 10.573    | 97719   | 1.320  |



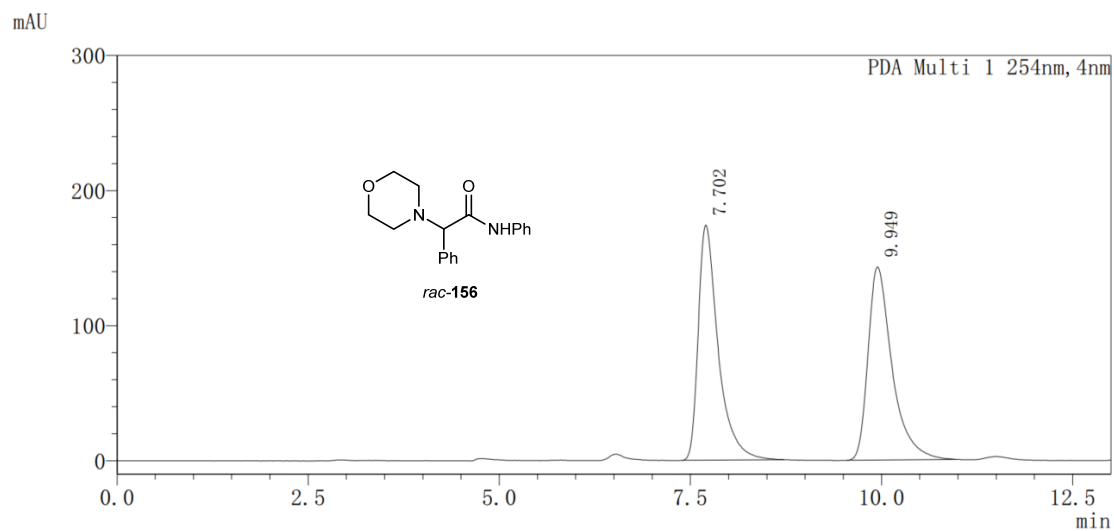

Peak Table

PDA Ch1 254nm

| Peak# | Ret. Time | Area    | Area%  |
|-------|-----------|---------|--------|
| 1     | 7.702     | 3157955 | 50.145 |
| 2     | 9.949     | 3139668 | 49.855 |

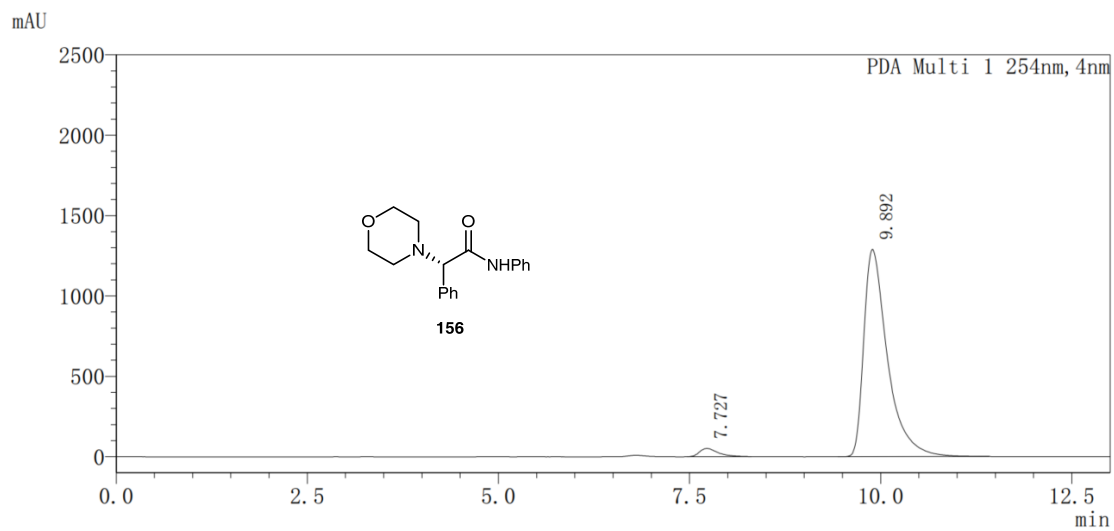

Peak Table

PDA Ch1 254nm

| Peak# | Ret. Time | Area     | Area%  |
|-------|-----------|----------|--------|
| 1     | 7.727     | 872024   | 3.024  |
| 2     | 9.892     | 27967797 | 96.976 |

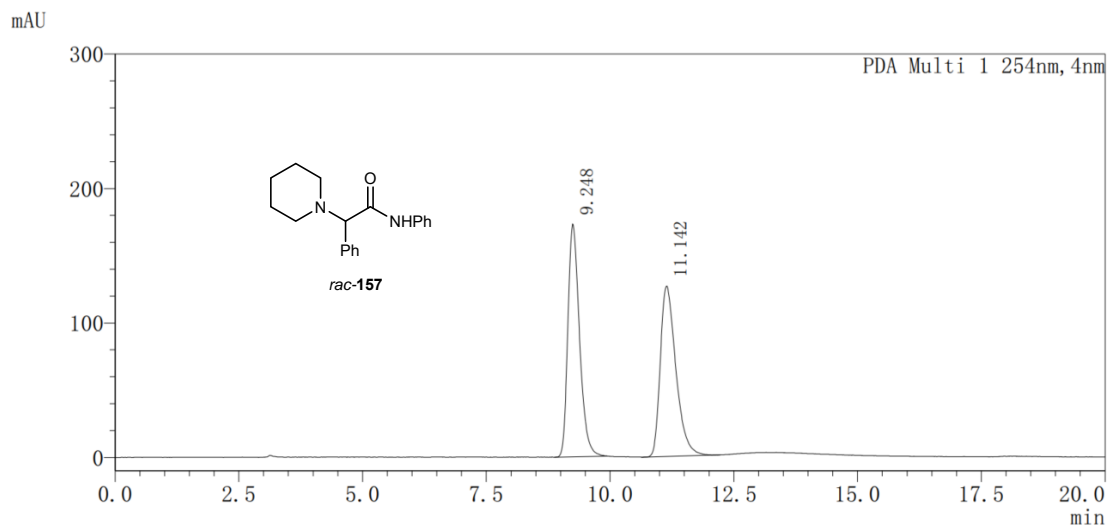

Peak Table

PDA Ch1 254nm

| Peak# | Ret. Time | Area    | Area%  |
|-------|-----------|---------|--------|
| 1     | 9.248     | 2826268 | 50.426 |
| 2     | 11.142    | 2778484 | 49.574 |

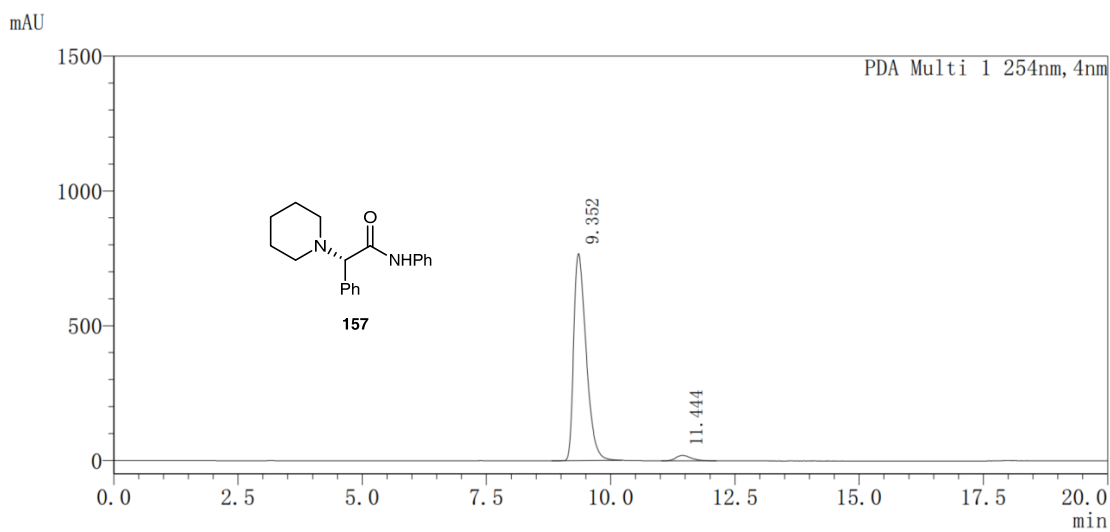

Peak Table

PDA Ch1 254nm

| Peak# | Ret. Time | Area     | Area%  |
|-------|-----------|----------|--------|
| 1     | 9.352     | 13448780 | 96.890 |
| 2     | 11.444    | 431628   | 3.110  |

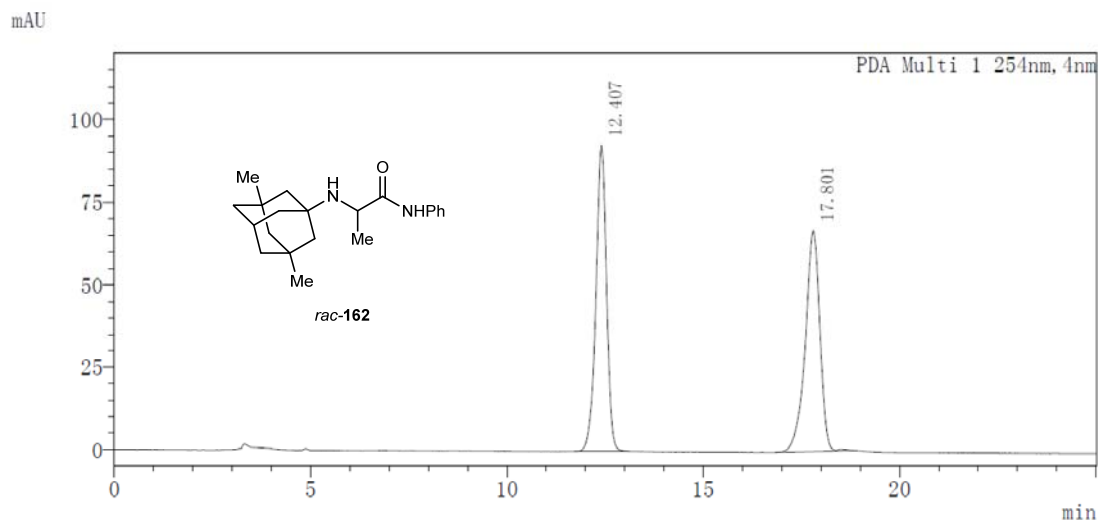

Peak Table

PDA Ch1 254nm

| Peak# | Ret. Time | Area    | Area%  |
|-------|-----------|---------|--------|
| 1     | 12.407    | 1744379 | 49.997 |
| 2     | 17.801    | 1744584 | 50.003 |

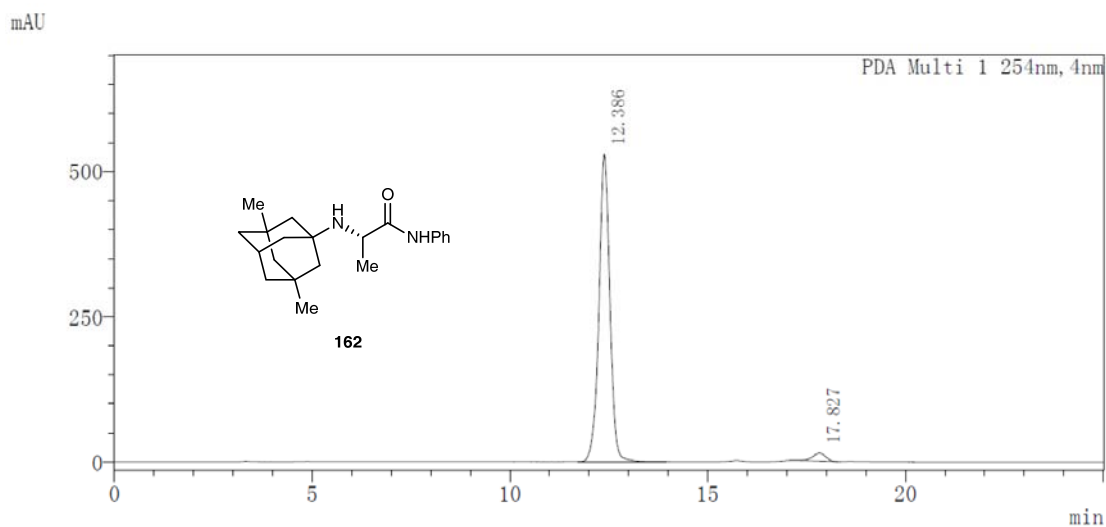

Peak Table

PDA Ch1 254nm

| Peak# | Ret. Time | Area     | Area%  |
|-------|-----------|----------|--------|
| 1     | 12.386    | 10192212 | 97.007 |
| 2     | 17.827    | 314473   | 2.993  |

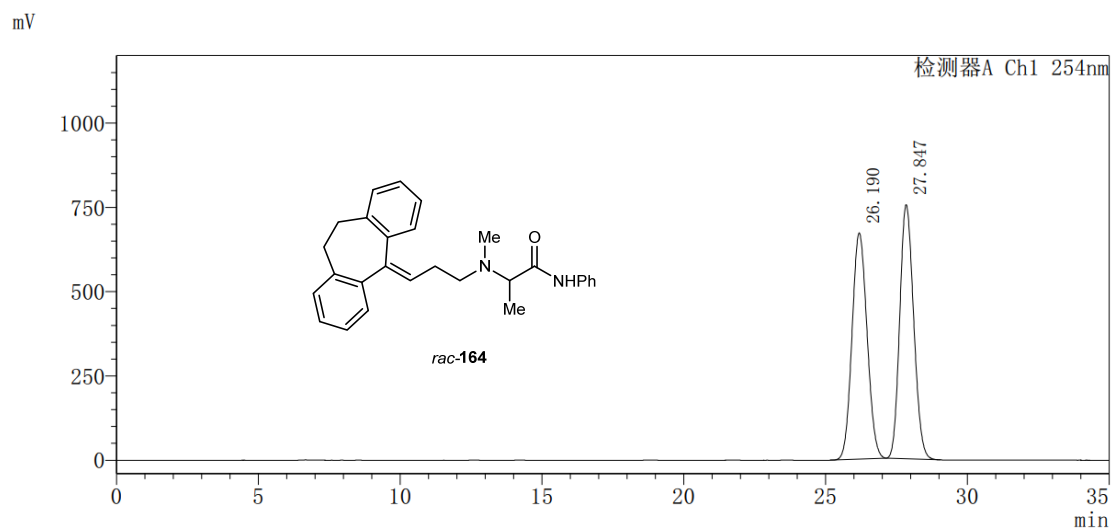

Peak Table

检测器A Ch1 254nm

| Peak# | Ret. Time | Area     | Area%  |
|-------|-----------|----------|--------|
| 1     | 26.190    | 24752319 | 49.051 |
| 2     | 27.847    | 25710358 | 50.949 |

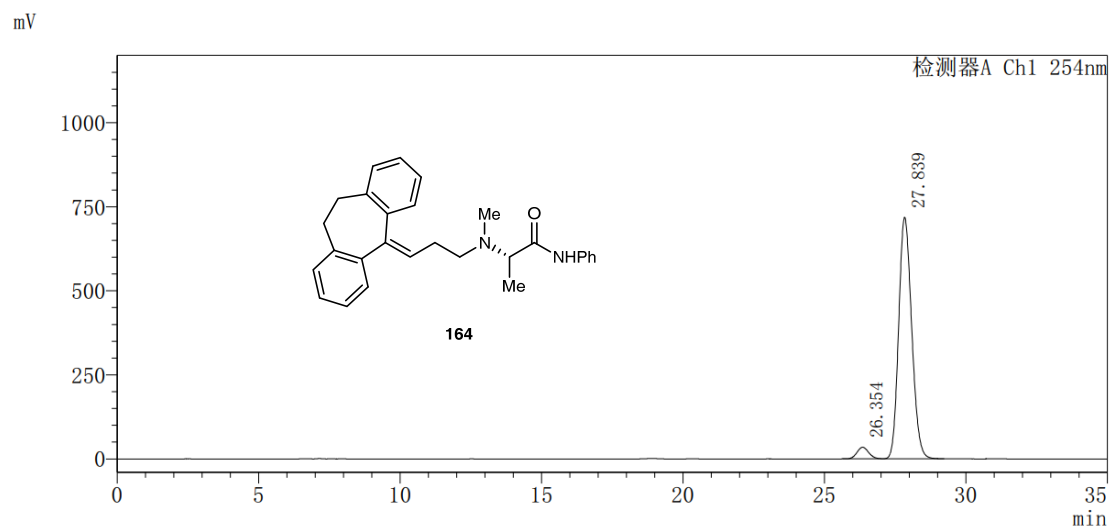

Peak Table

检测器A Ch1 254nm

| Peak# | Ret. Time | Area     | Area%  |
|-------|-----------|----------|--------|
| 1     | 26.354    | 989134   | 4.135  |
| 2     | 27.839    | 22929786 | 95.865 |

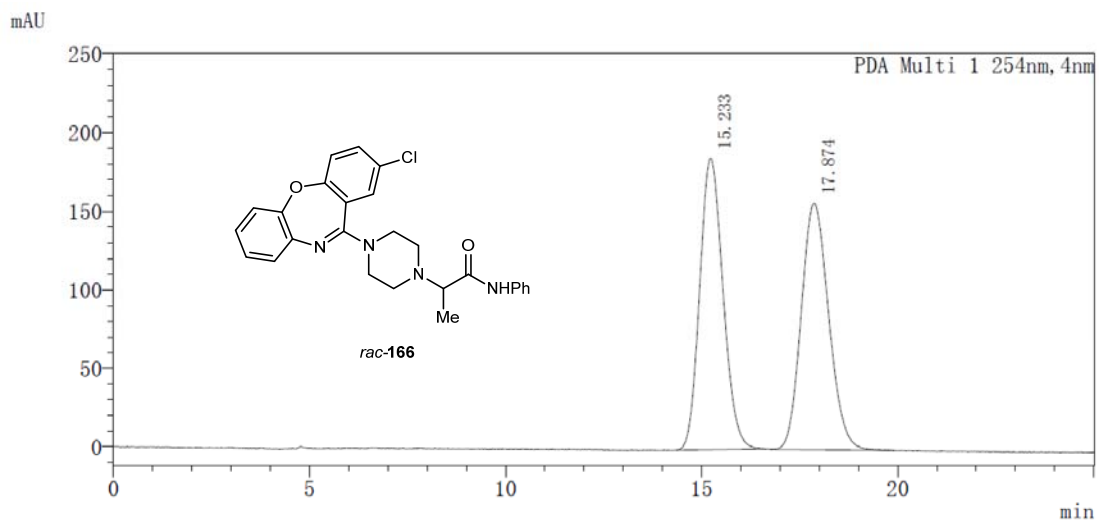

Peak Table

PDA Ch1 254nm

| Peak# | Ret. Time | Area    | Area%  |
|-------|-----------|---------|--------|
| 1     | 15.233    | 7695743 | 50.095 |
| 2     | 17.874    | 7666650 | 49.905 |

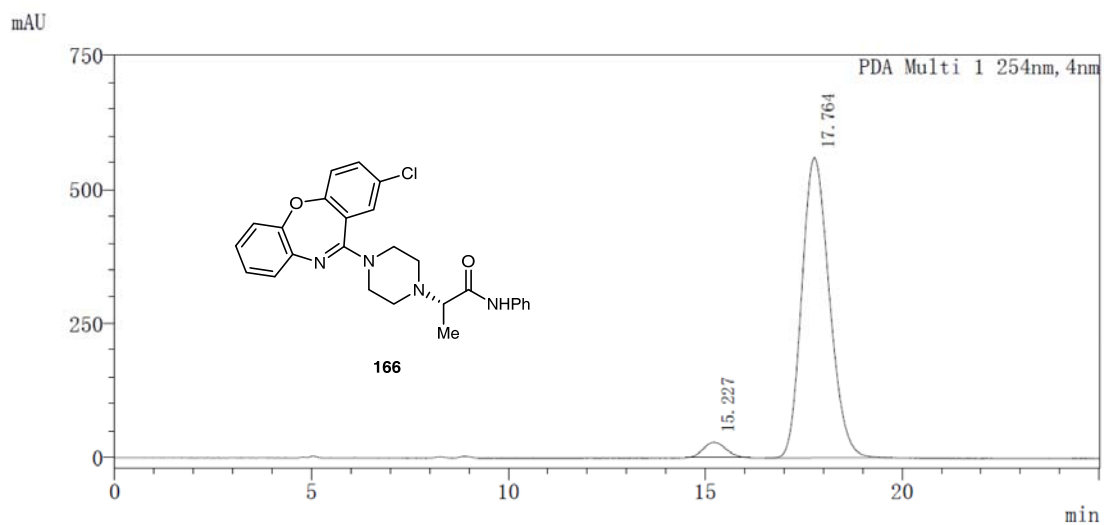

Peak Table

PDA Ch1 254nm

| Peak# | Ret. Time | Area     | Area%  |
|-------|-----------|----------|--------|
| 1     | 15.227    | 1169321  | 4.111  |
| 2     | 17.764    | 27271092 | 95.889 |

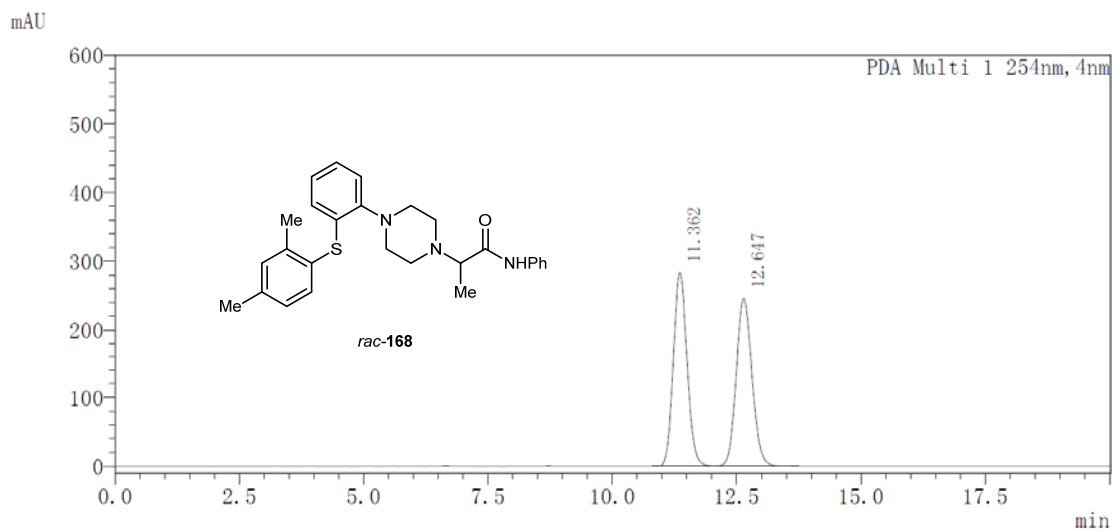

Peak Table

PDA Ch1 254nm

| Peak# | Ret. Time | Area    | Area%  |
|-------|-----------|---------|--------|
| 1     | 11.362    | 5418268 | 50.047 |
| 2     | 12.647    | 5408082 | 49.953 |

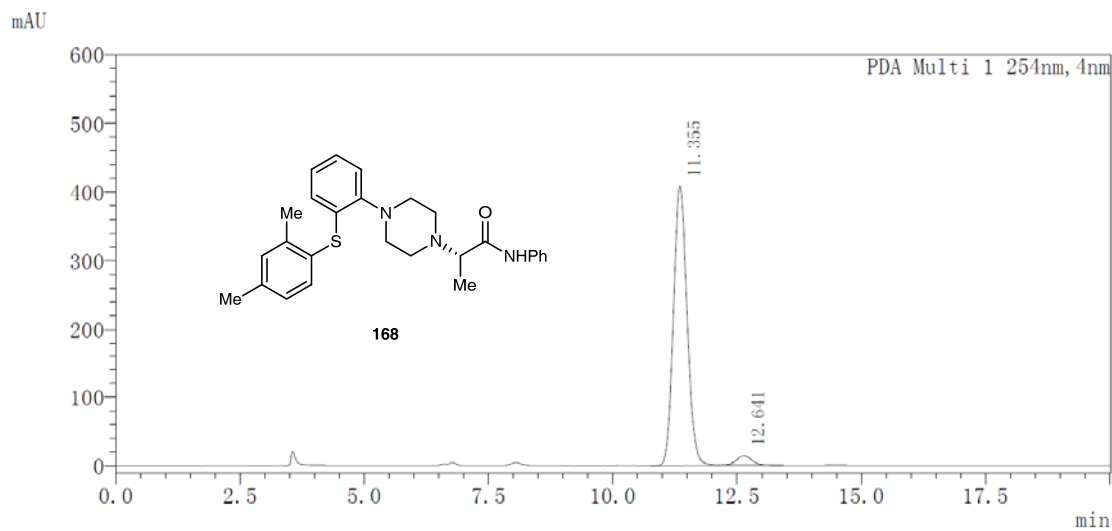

Peak Table

PDA Ch1 254nm

| Peak# | Ret. Time | Area    | Area%  |
|-------|-----------|---------|--------|
| 1     | 11.355    | 7815810 | 95.863 |
| 2     | 12.641    | 337320  | 4.137  |

mAU

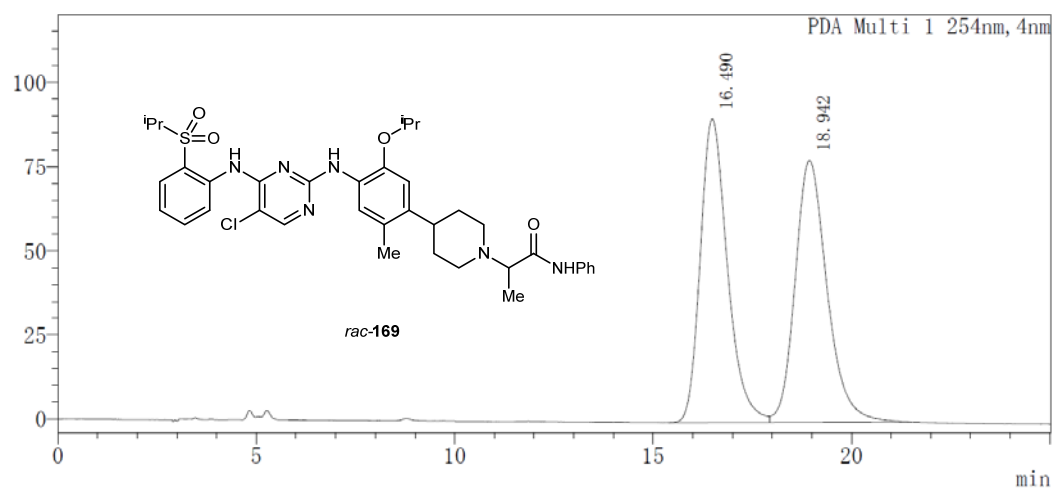

Peak Table

PDA Ch1 254nm

| Peak# | Ret. Time | Area    | Area%  |
|-------|-----------|---------|--------|
| 1     | 16.490    | 4295079 | 49.589 |
| 2     | 18.942    | 4366296 | 50.411 |

mAU

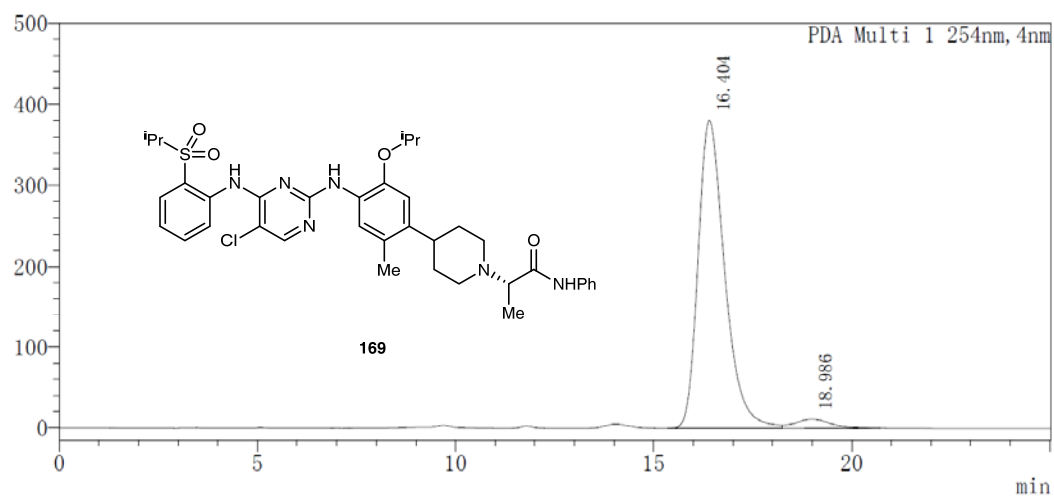

Peak Table

PDA Ch1 254nm

| Peak# | Ret. Time | Area     | Area%  |
|-------|-----------|----------|--------|
| 1     | 16.404    | 17837631 | 96.317 |
| 2     | 18.986    | 682076   | 3.683  |

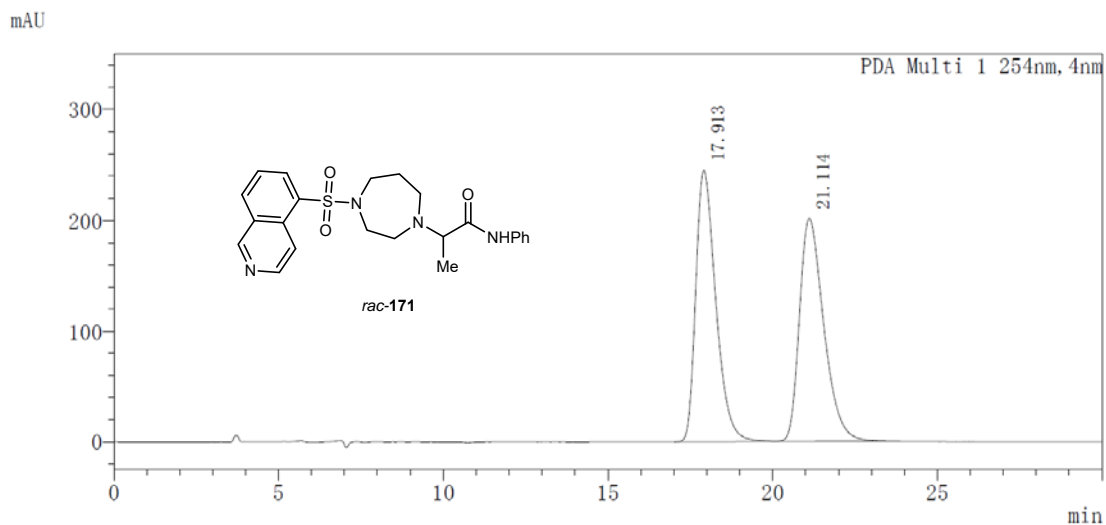

Peak Table

PDA Ch1 254nm

| Peak# | Ret. Time | Area     | Area%  |
|-------|-----------|----------|--------|
| 1     | 17.913    | 10379042 | 50.031 |
| 2     | 21.114    | 10366361 | 49.969 |

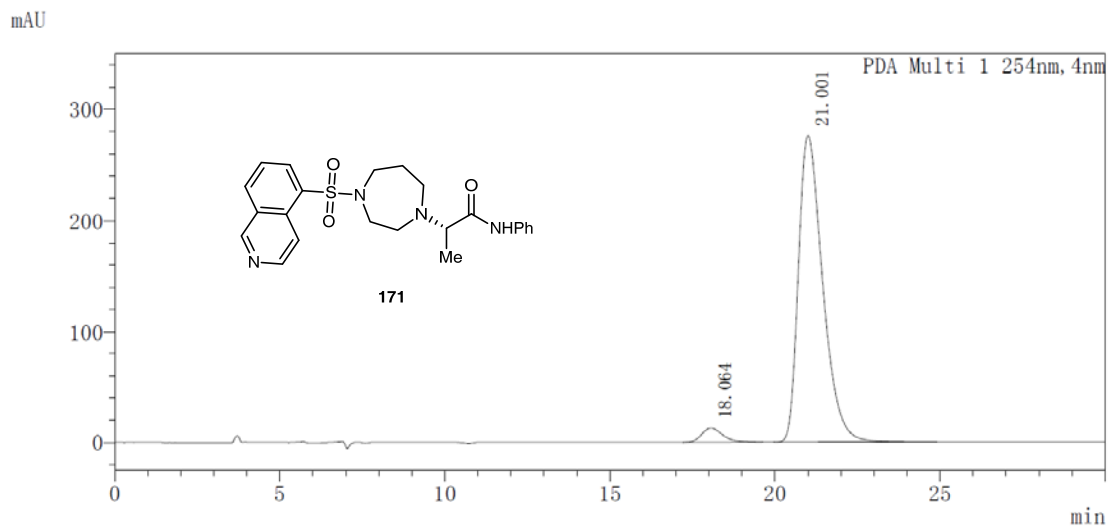

Peak Table

PDA Ch1 254nm

| Peak# | Ret. Time | Area     | Area%  |
|-------|-----------|----------|--------|
| 1     | 18.064    | 573881   | 3.905  |
| 2     | 21.001    | 14124011 | 96.095 |



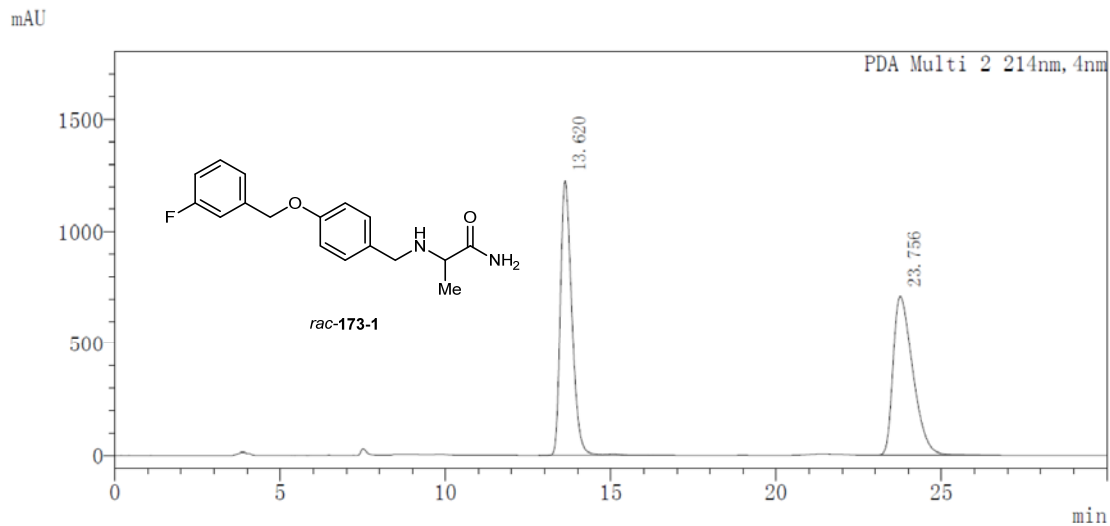

Peak Table

PDA Ch2 214nm

| Peak# | Ret. Time | Area     | Area%  |
|-------|-----------|----------|--------|
| 1     | 13.620    | 29527502 | 50.081 |
| 2     | 23.756    | 29432228 | 49.919 |

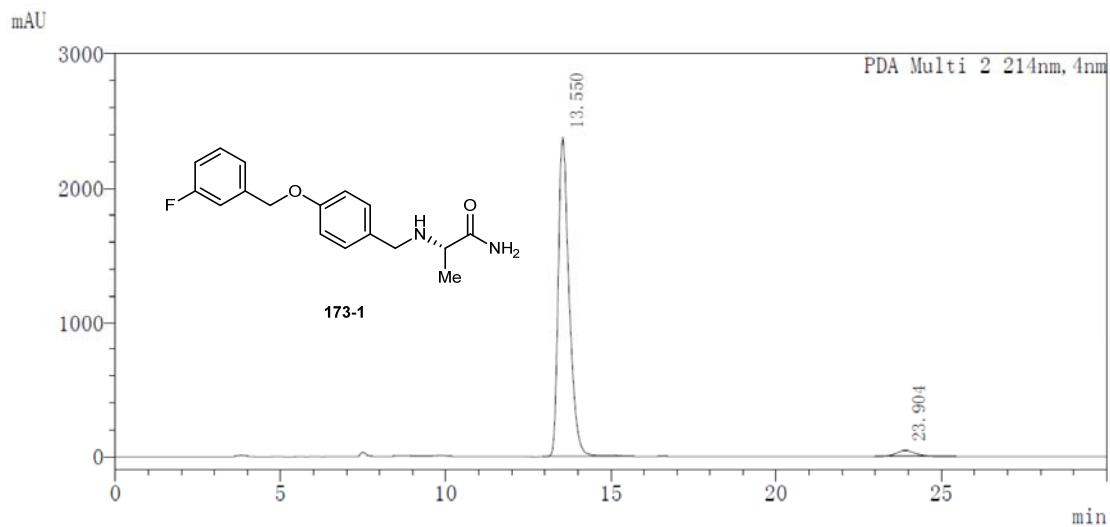

Peak Table

PDA Ch2 214nm

| Peak# | Ret. Time | Area     | Area%  |
|-------|-----------|----------|--------|
| 1     | 13.550    | 54650896 | 96.895 |
| 2     | 23.904    | 1751264  | 3.105  |

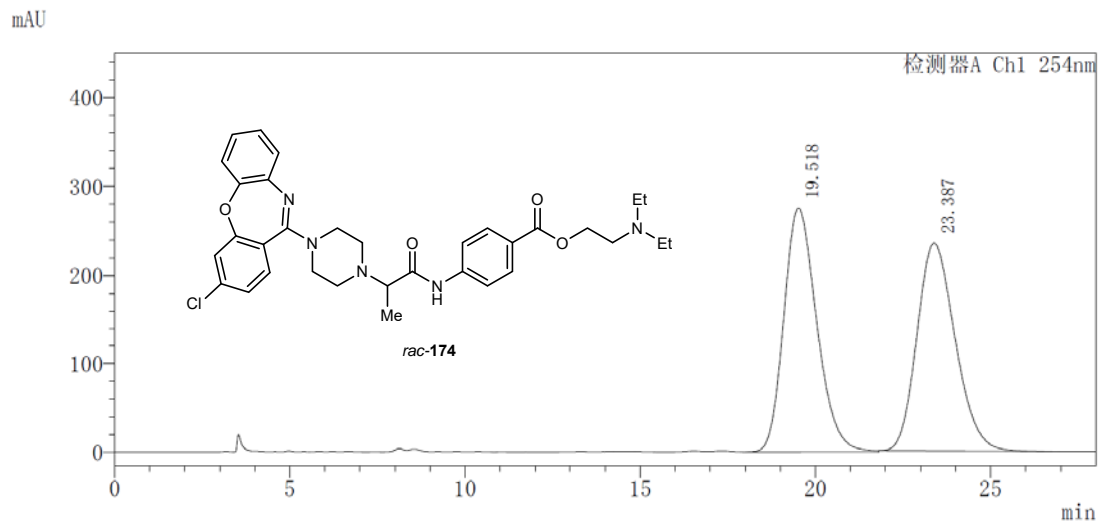

Peak Table

检测器A Ch1 254nm

| Peak# | Ret. Time | Area     | Area%  |
|-------|-----------|----------|--------|
| 1     | 19.518    | 18091353 | 50.313 |
| 2     | 23.387    | 17866146 | 49.687 |

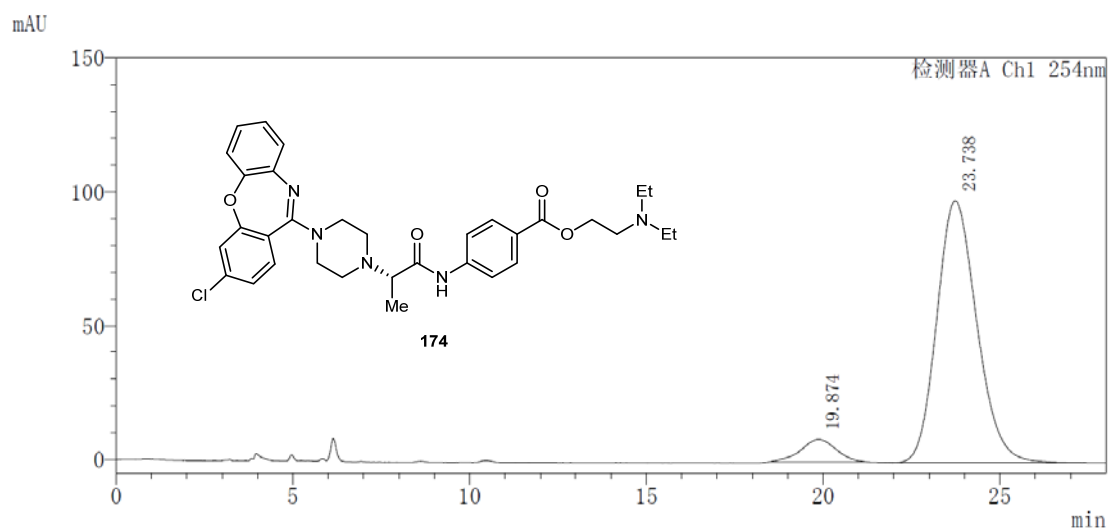

Peak Table

检测器A Ch1 254nm

| Peak# | Ret. Time | Area    | Area%  |
|-------|-----------|---------|--------|
| 1     | 19.874    | 573417  | 6.938  |
| 2     | 23.738    | 7691609 | 93.062 |

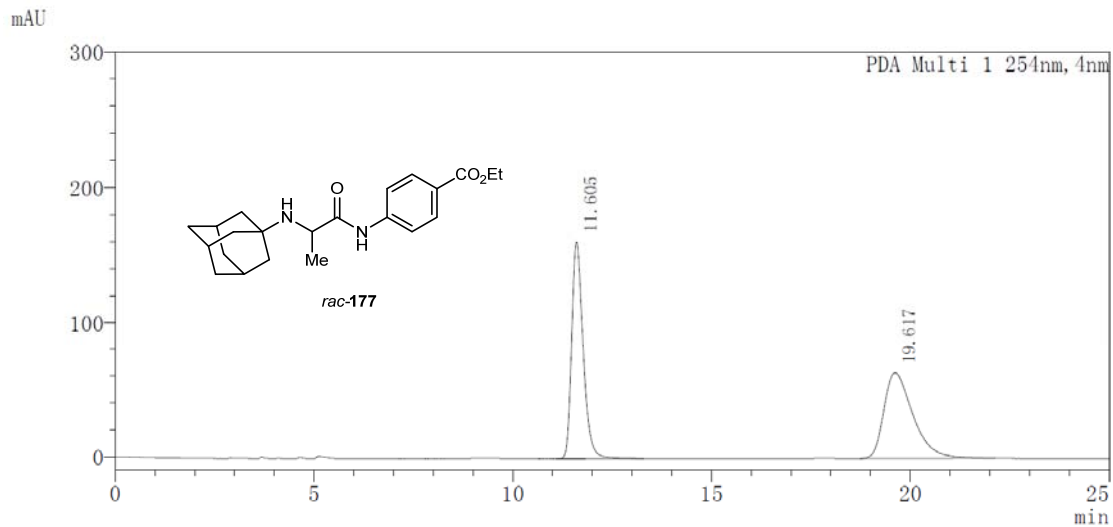

Peak Table

PDA Ch1 254nm

| Peak# | Ret. Time | Area    | Area%  |
|-------|-----------|---------|--------|
| 1     | 11.605    | 3223584 | 50.112 |
| 2     | 19.617    | 3209126 | 49.888 |

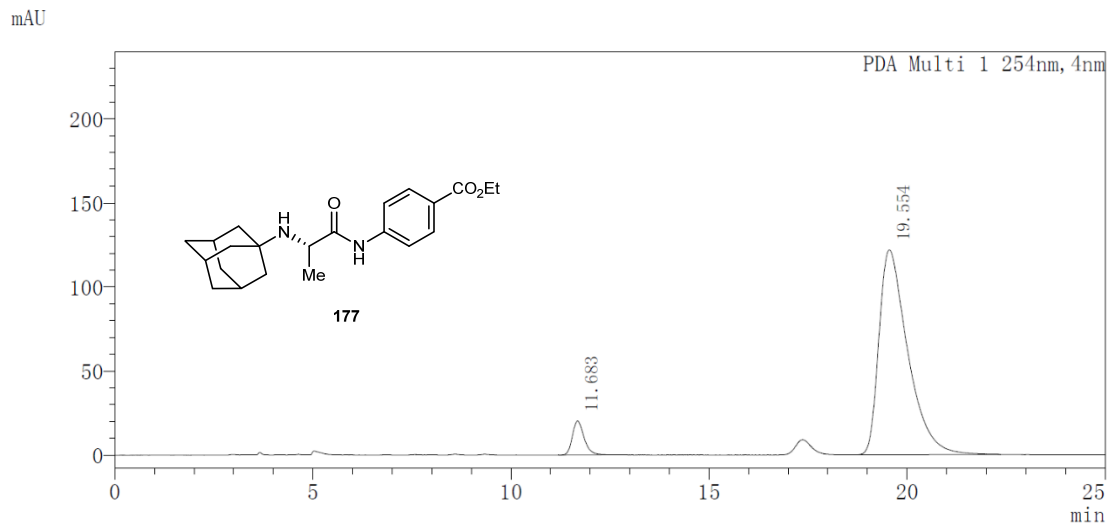

Peak Table

PDA Ch1 254nm

| Peak# | Ret. Time | Area    | Area%  |
|-------|-----------|---------|--------|
| 1     | 11.683    | 410423  | 6.241  |
| 2     | 19.554    | 6166254 | 93.759 |

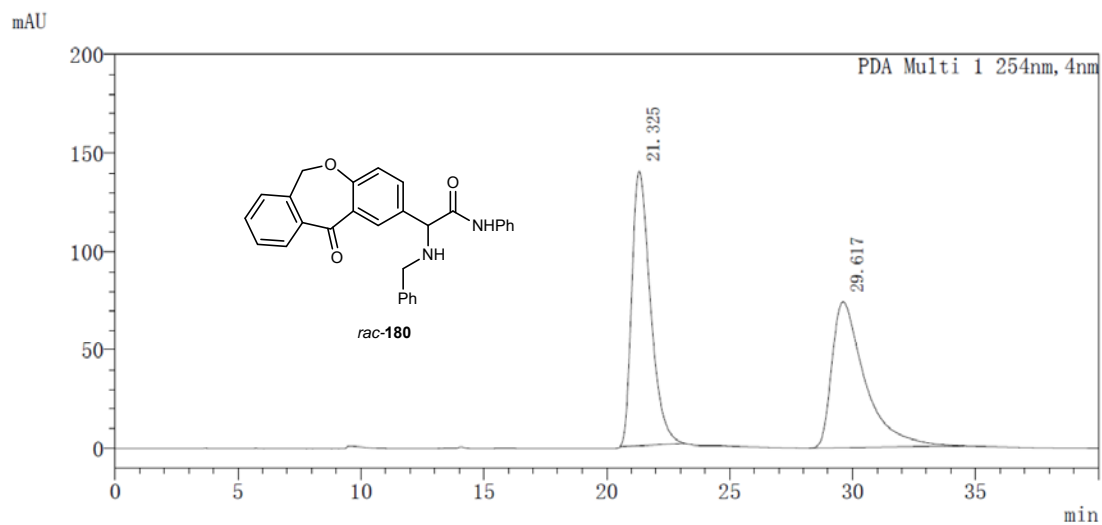

Peak Table

PDA Ch1 254nm

| Peak# | Ret. Time | Area    | Area%  |
|-------|-----------|---------|--------|
| 1     | 21.325    | 7340316 | 51.438 |
| 2     | 29.617    | 6929819 | 48.562 |

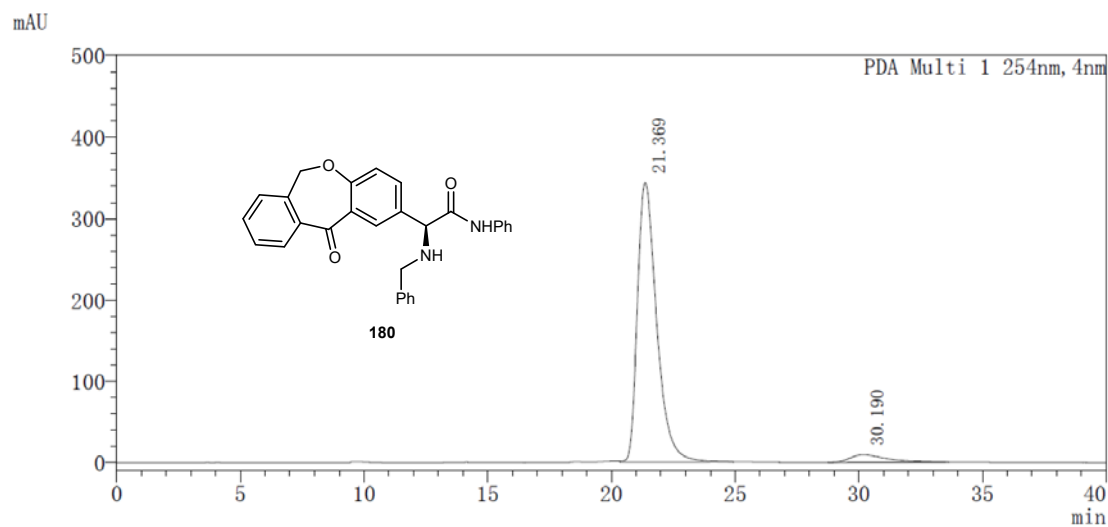

Peak Table

PDA Ch1 254nm

| Peak# | Ret. Time | Area     | Area%  |
|-------|-----------|----------|--------|
| 1     | 21.369    | 18584713 | 95.139 |
| 2     | 30.190    | 949520   | 4.861  |

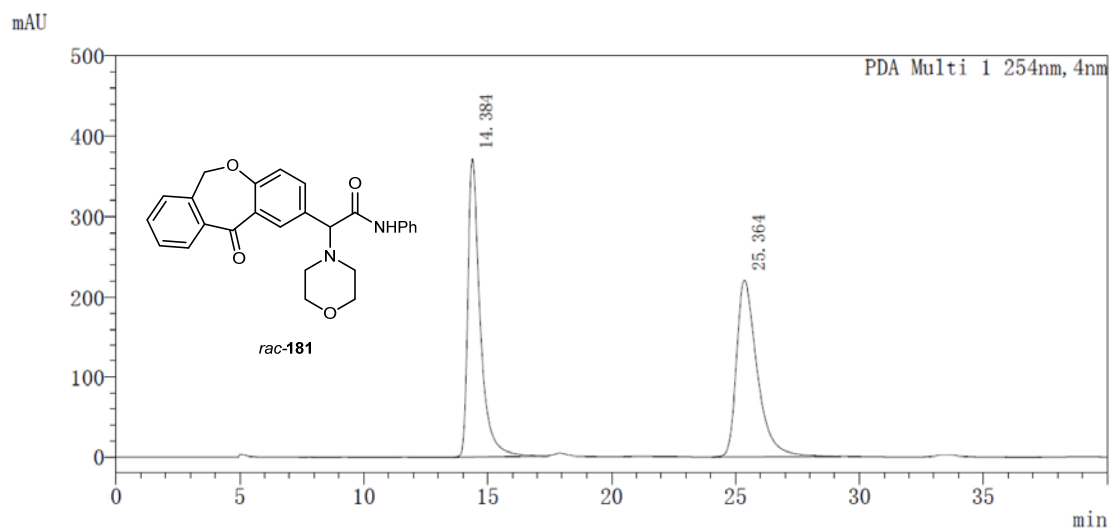

Peak Table

PDA Ch1 254nm

| Peak# | Ret. Time | Area     | Area%  |
|-------|-----------|----------|--------|
| 1     | 14.384    | 12813988 | 50.025 |
| 2     | 25.364    | 12801177 | 49.975 |

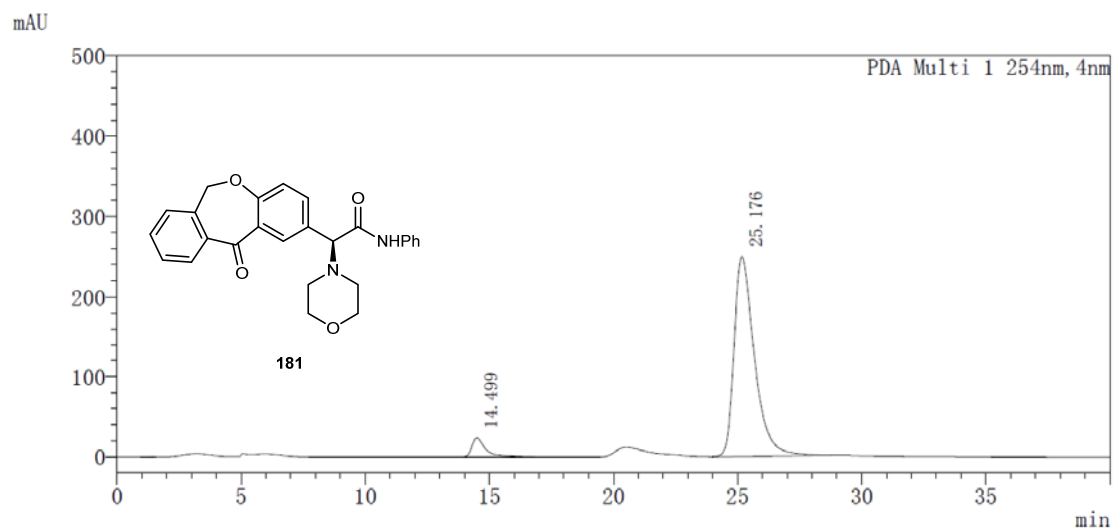

Peak Table

PDA Ch1 254nm

| Peak# | Ret. Time | Area     | Area%  |
|-------|-----------|----------|--------|
| 1     | 14.499    | 936657   | 6.157  |
| 2     | 25.176    | 14276441 | 93.843 |

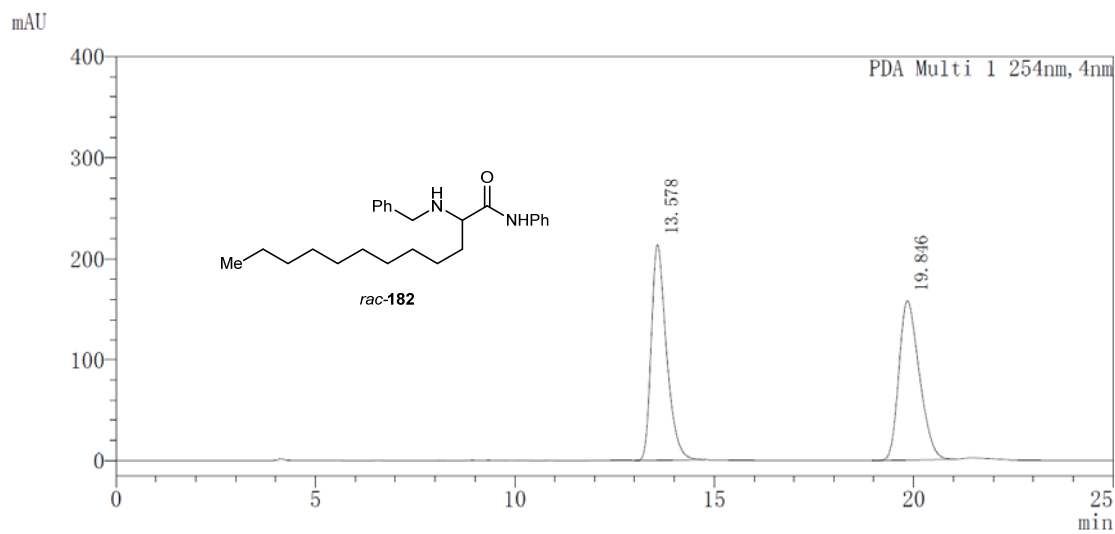

Peak Table

PDA Ch1 254nm

| Peak# | Ret. Time | Area    | Area%  |
|-------|-----------|---------|--------|
| 1     | 13.578    | 5667260 | 50.143 |
| 2     | 19.846    | 5634880 | 49.857 |

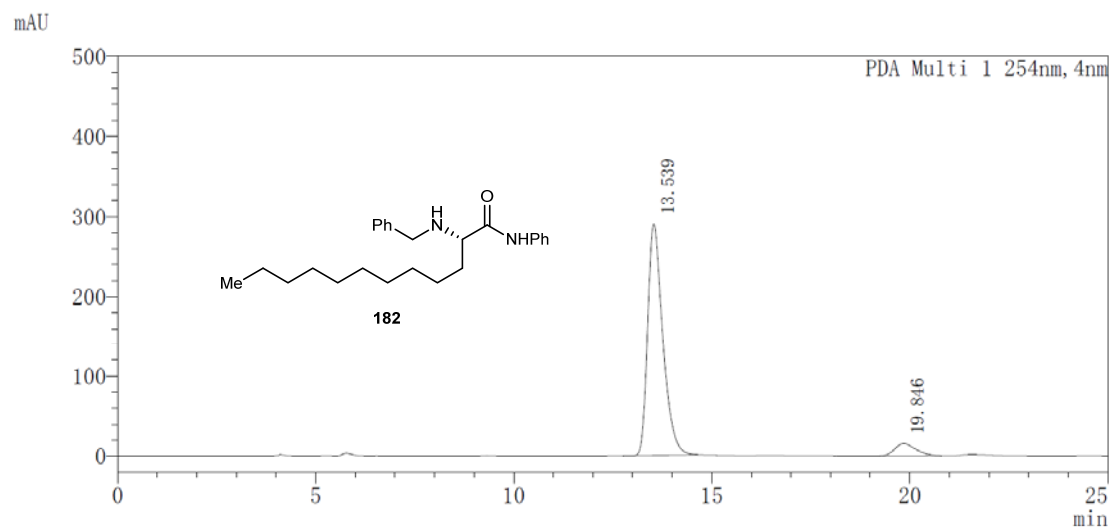

Peak Table

PDA Ch1 254nm

| Peak# | Ret. Time | Area    | Area%  |
|-------|-----------|---------|--------|
| 1     | 13.539    | 7693575 | 93.195 |
| 2     | 19.846    | 561815  | 6.805  |

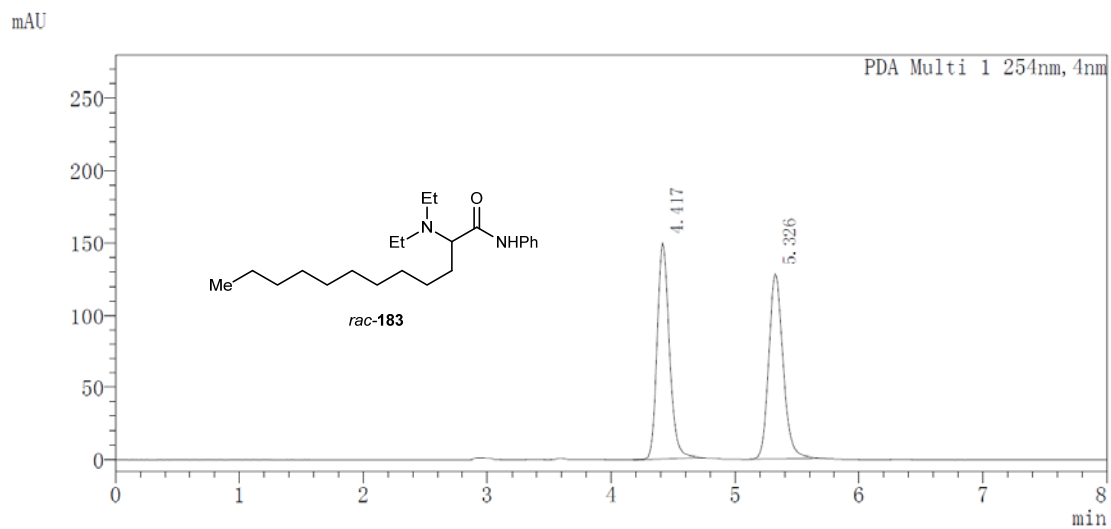

Peak Table

PDA Ch1 254nm

| Peak# | Ret. Time | Area    | Area%  |
|-------|-----------|---------|--------|
| 1     | 4.417     | 1031804 | 49.879 |
| 2     | 5.326     | 1036816 | 50.121 |

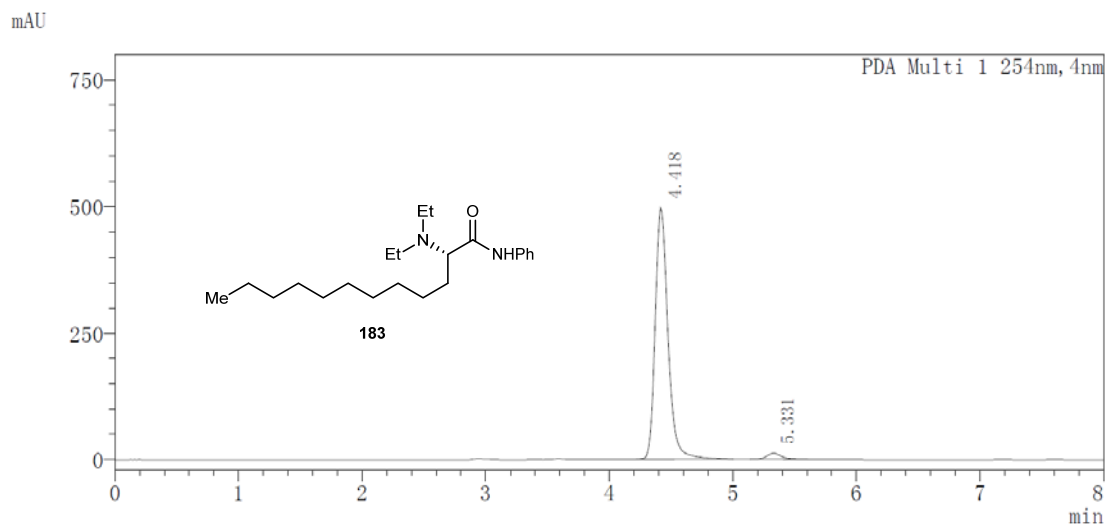

Peak Table

PDA Ch1 254nm

| Peak# | Ret. Time | Area    | Area%  |
|-------|-----------|---------|--------|
| 1     | 4.418     | 3589423 | 97.382 |
| 2     | 5.331     | 96502   | 2.618  |

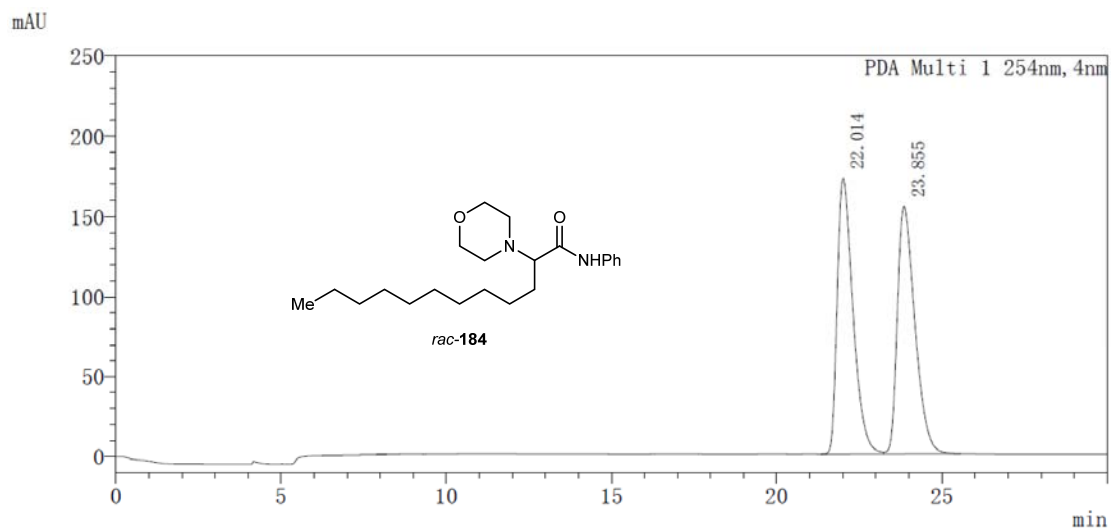

Peak Table

PDA Ch1 254nm

| Peak# | Ret. Time | Area    | Area%  |
|-------|-----------|---------|--------|
| 1     | 22.014    | 5717016 | 50.044 |
| 2     | 23.855    | 5706855 | 49.956 |

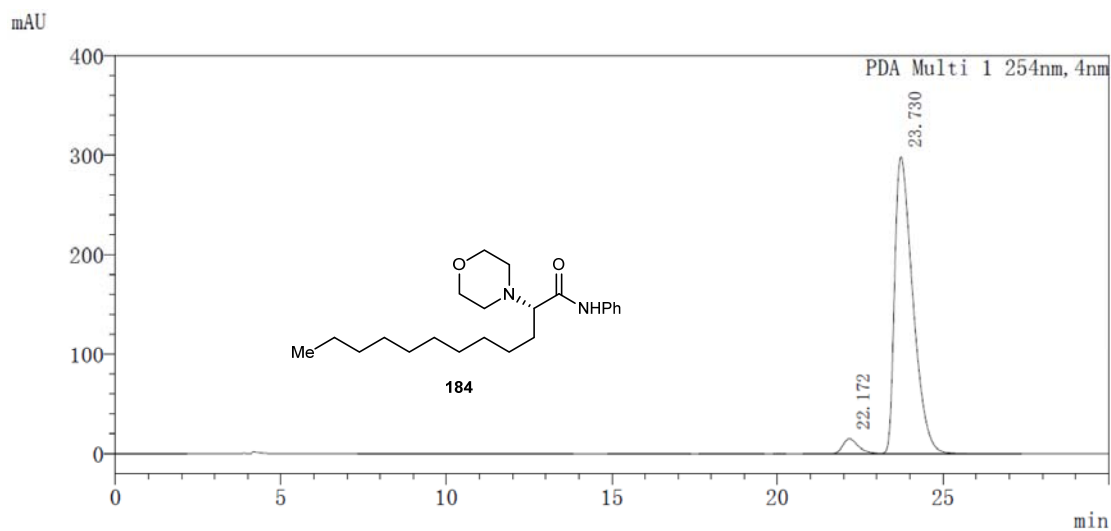

Peak Table

PDA Ch1 254nm

| Peak# | Ret. Time | Area     | Area%  |
|-------|-----------|----------|--------|
| 1     | 22.172    | 487750   | 4.106  |
| 2     | 23.730    | 11390373 | 95.894 |



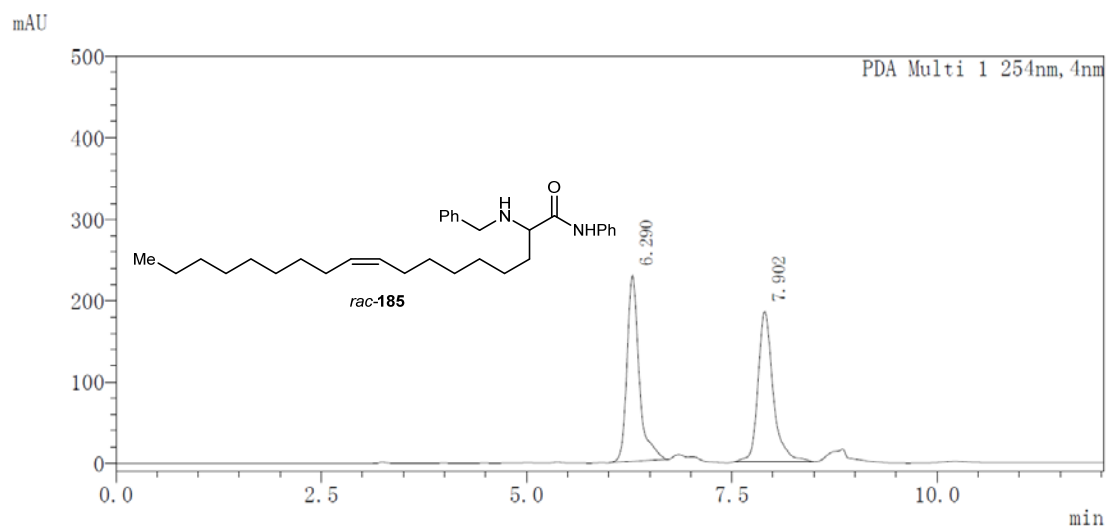

Peak Table

PDA Ch1 254nm

| Peak# | Ret. Time | Area    | Area%  |
|-------|-----------|---------|--------|
| 1     | 6.290     | 2385352 | 50.146 |
| 2     | 7.902     | 2371441 | 49.854 |

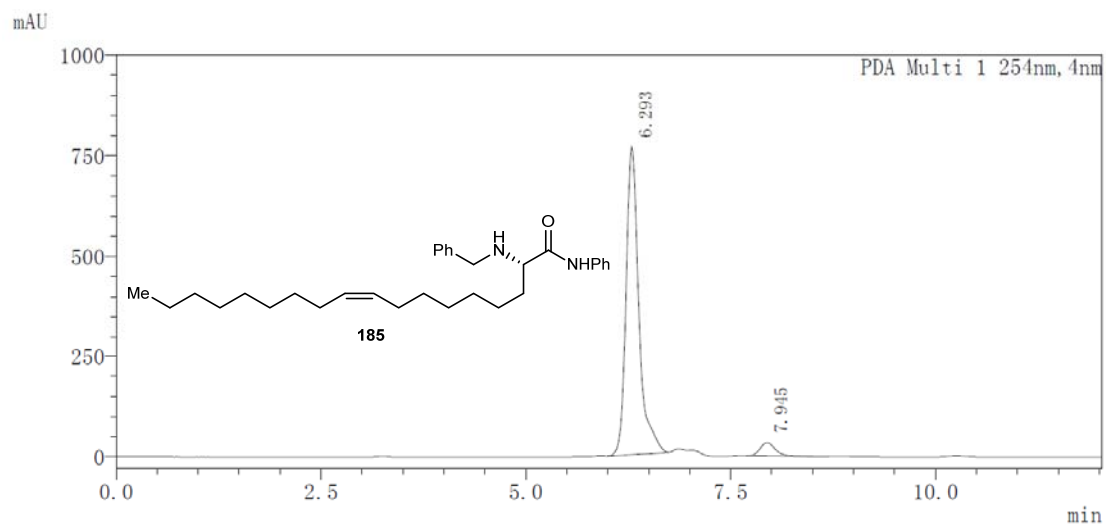

Peak Table

PDA Ch1 254nm

| Peak# | Ret. Time | Area    | Area%  |
|-------|-----------|---------|--------|
| 1     | 6.293     | 8366430 | 95.097 |
| 2     | 7.945     | 431362  | 4.903  |

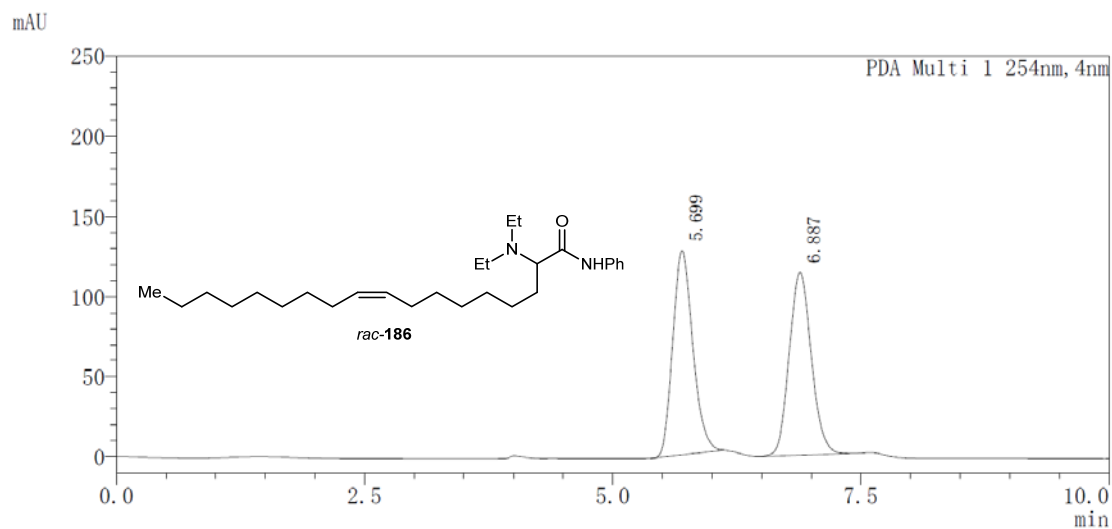

Peak Table

PDA Ch1 254nm

| Peak# | Ret. Time | Area    | Area%  |
|-------|-----------|---------|--------|
| 1     | 5.699     | 1791760 | 50.321 |
| 2     | 6.887     | 1768885 | 49.679 |

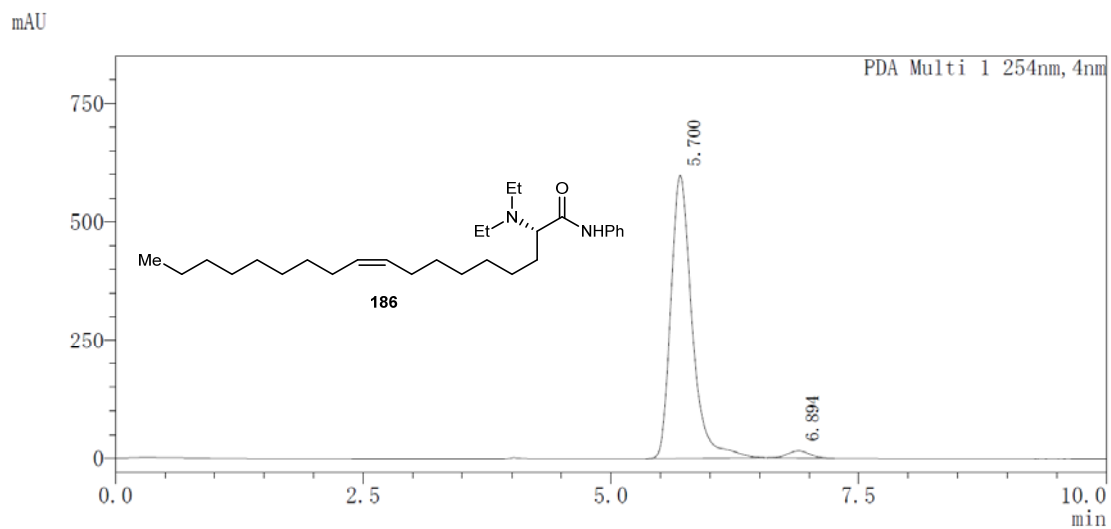

Peak Table

PDA Ch1 254nm

| Peak# | Ret. Time | Area    | Area%  |
|-------|-----------|---------|--------|
| 1     | 5.700     | 8920396 | 97.451 |
| 2     | 6.894     | 233308  | 2.549  |

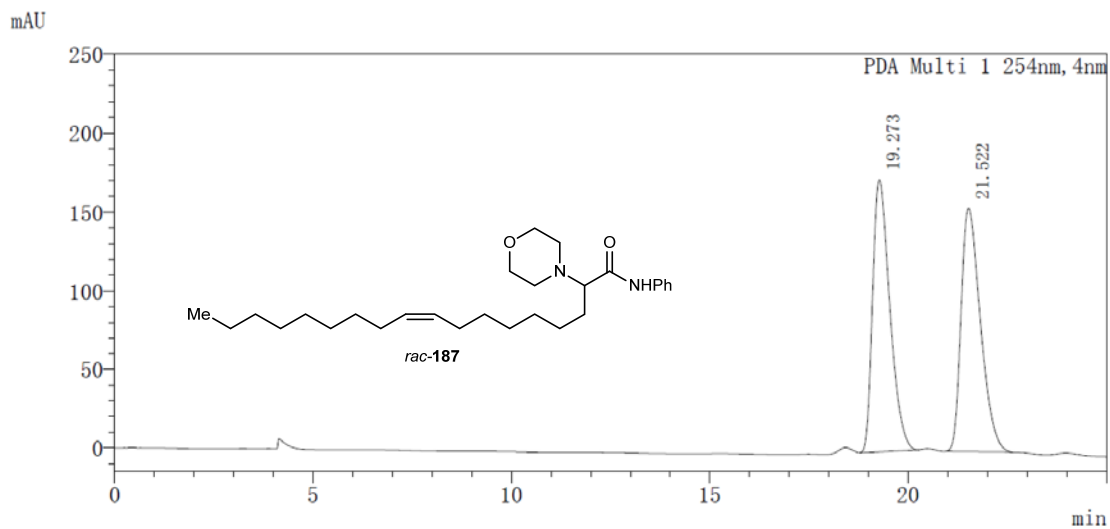

Peak Table

PDA Ch1 254nm

| Peak# | Ret. Time | Area    | Area%  |
|-------|-----------|---------|--------|
| 1     | 19.273    | 5213927 | 49.819 |
| 2     | 21.522    | 5251917 | 50.181 |

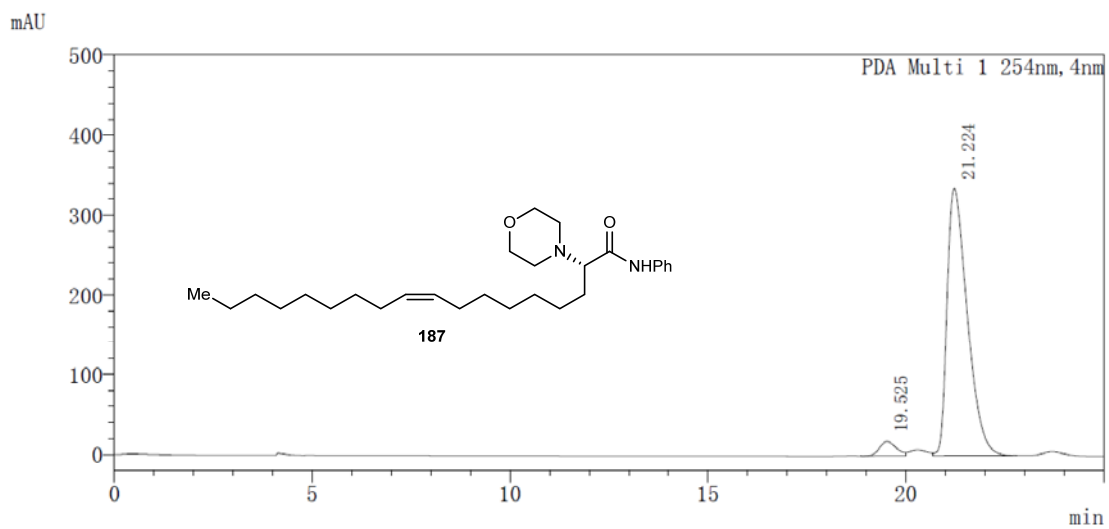

Peak Table

PDA Ch1 254nm

| Peak# | Ret. Time | Area     | Area%  |
|-------|-----------|----------|--------|
| 1     | 19.525    | 540154   | 4.344  |
| 2     | 21.224    | 11895507 | 95.656 |

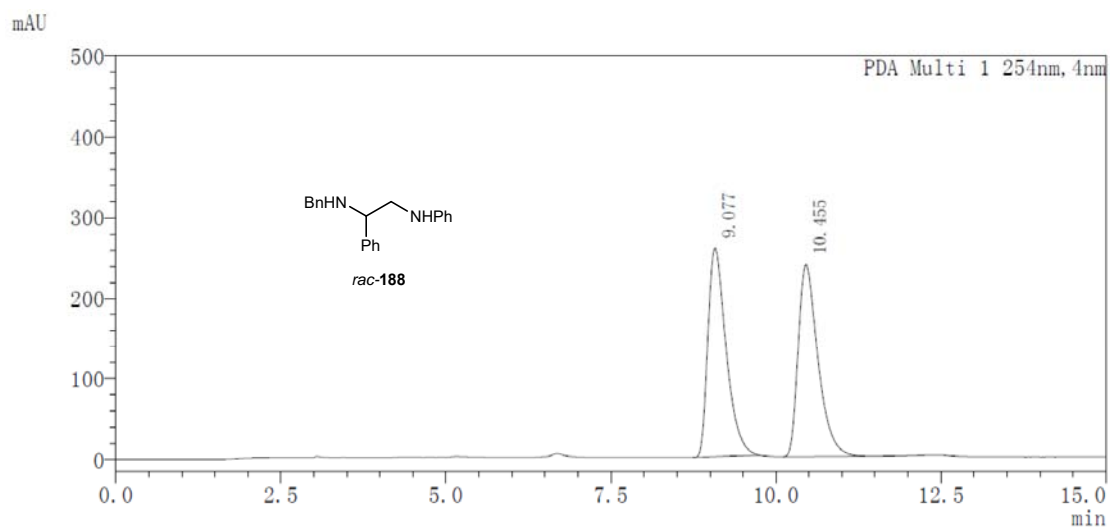

Peak Table

PDA Ch1 254nm

| Peak# | Ret. Time | Area    | Area%  |
|-------|-----------|---------|--------|
| 1     | 9.077     | 4978877 | 50.022 |
| 2     | 10.455    | 4974553 | 49.978 |

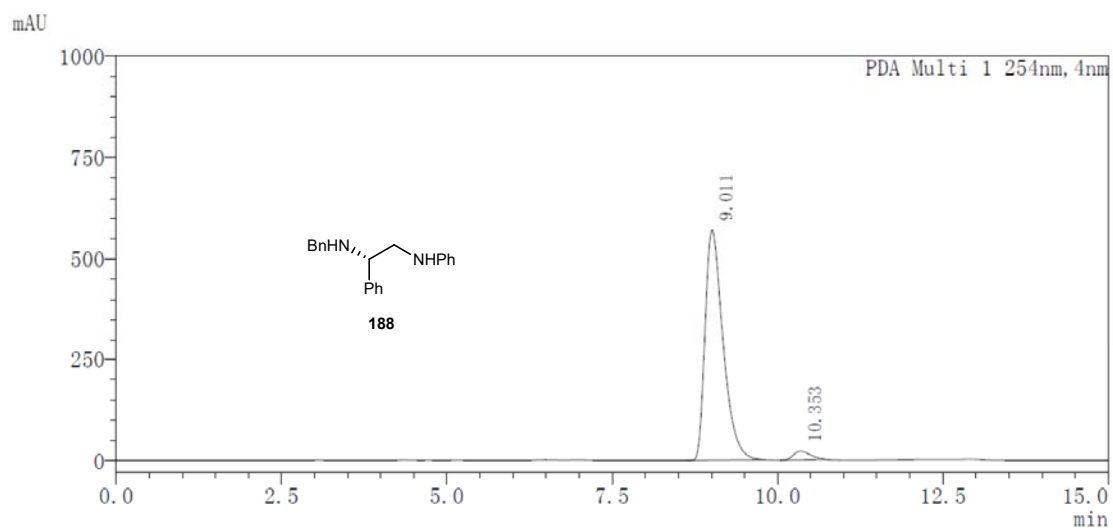

Peak Table

PDA Ch1 254nm

| Peak# | Ret. Time | Area     | Area%  |
|-------|-----------|----------|--------|
| 1     | 9.011     | 10798864 | 96.572 |
| 2     | 10.353    | 383317   | 3.428  |

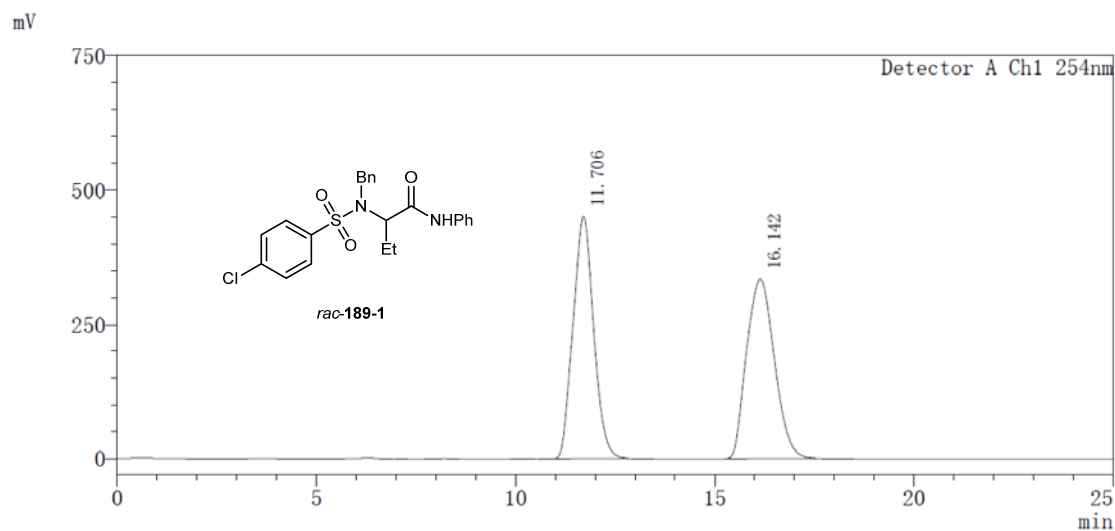

Peak Table

Detector A Ch1 254nm

| Peak# | Ret. Time | Area     | Area%  |
|-------|-----------|----------|--------|
| 1     | 11.706    | 16235886 | 49.983 |
| 2     | 16.142    | 16246990 | 50.017 |

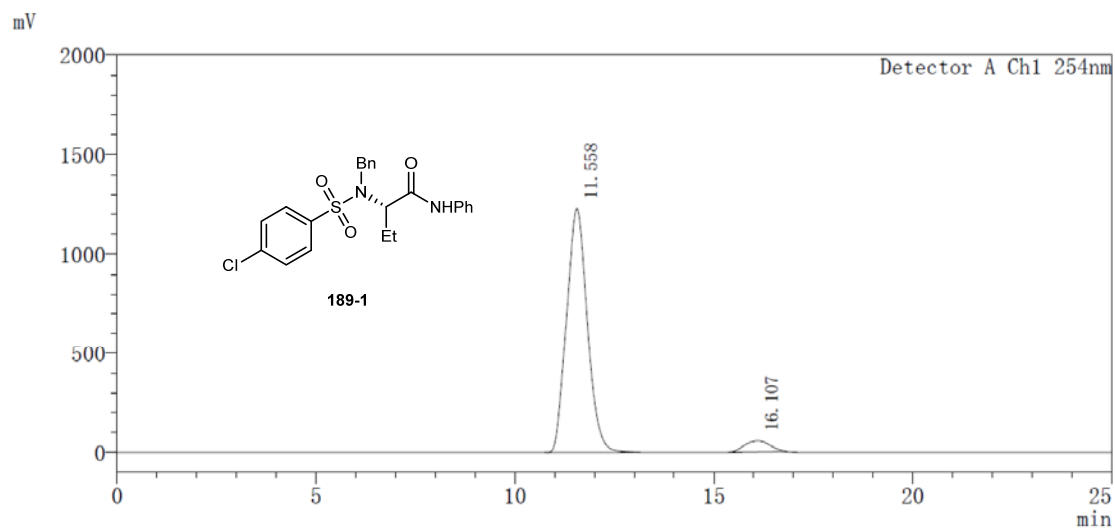

Peak Table

Detector A Ch1 254nm

| Peak# | Ret. Time | Area     | Area%  |
|-------|-----------|----------|--------|
| 1     | 11.558    | 44733560 | 94.781 |
| 2     | 16.107    | 2463169  | 5.219  |

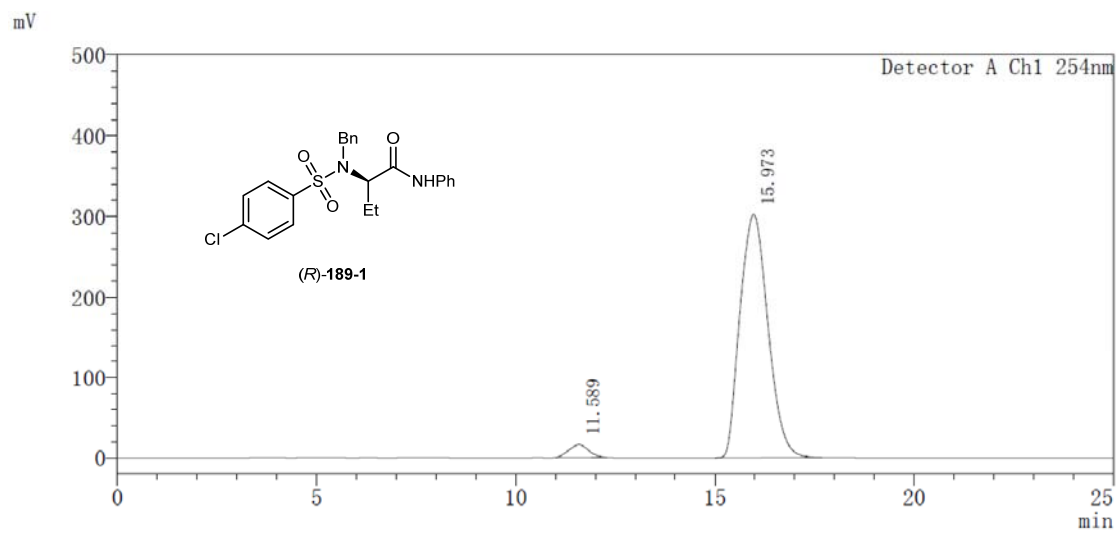

Peak Table

Detector A Ch1 254nm

| Peak# | Ret. Time | Area     | Area%  |
|-------|-----------|----------|--------|
| 1     | 11.589    | 546512   | 3.572  |
| 2     | 15.973    | 14751444 | 96.428 |

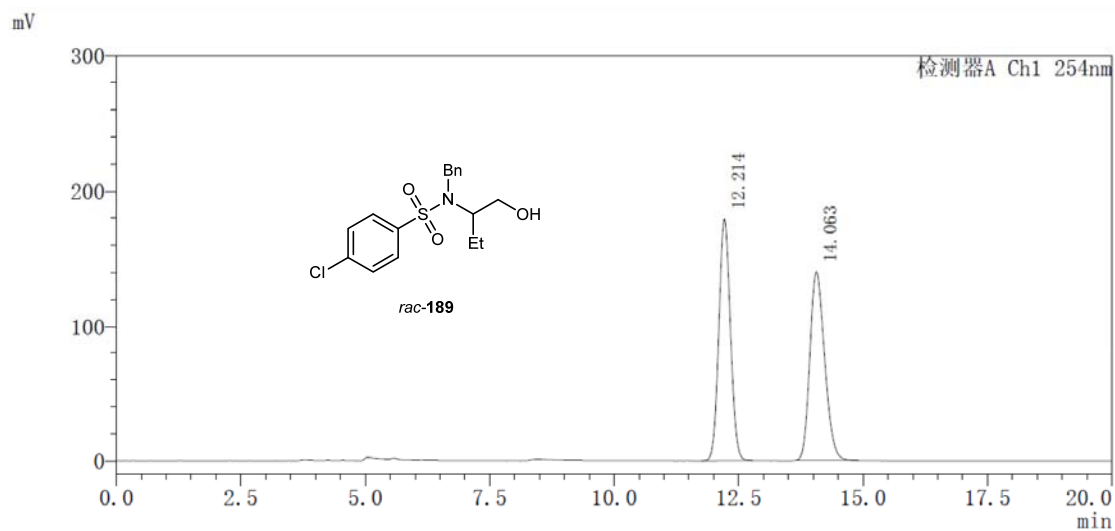

Peak Table

检测器A Ch1 254nm

| Peak# | Ret. Time | Area    | Area%  |
|-------|-----------|---------|--------|
| 1     | 12.214    | 2900012 | 50.110 |
| 2     | 14.063    | 2887278 | 49.890 |

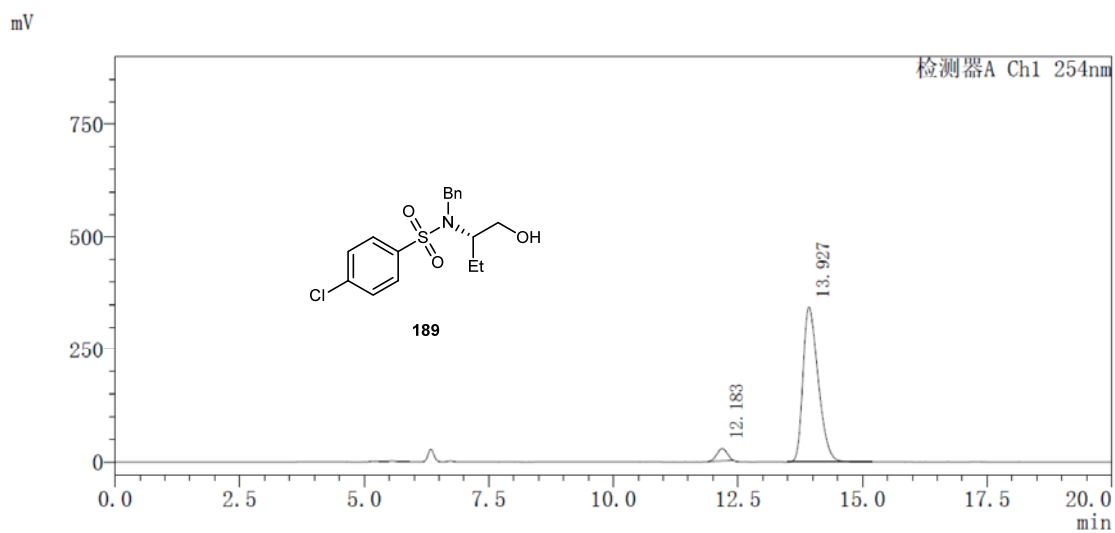

Peak Table

检测器A Ch1 254nm

| Peak# | Ret. Time | Area    | Area%  |
|-------|-----------|---------|--------|
| 1     | 12.183    | 392320  | 5.130  |
| 2     | 13.927    | 7255788 | 94.870 |

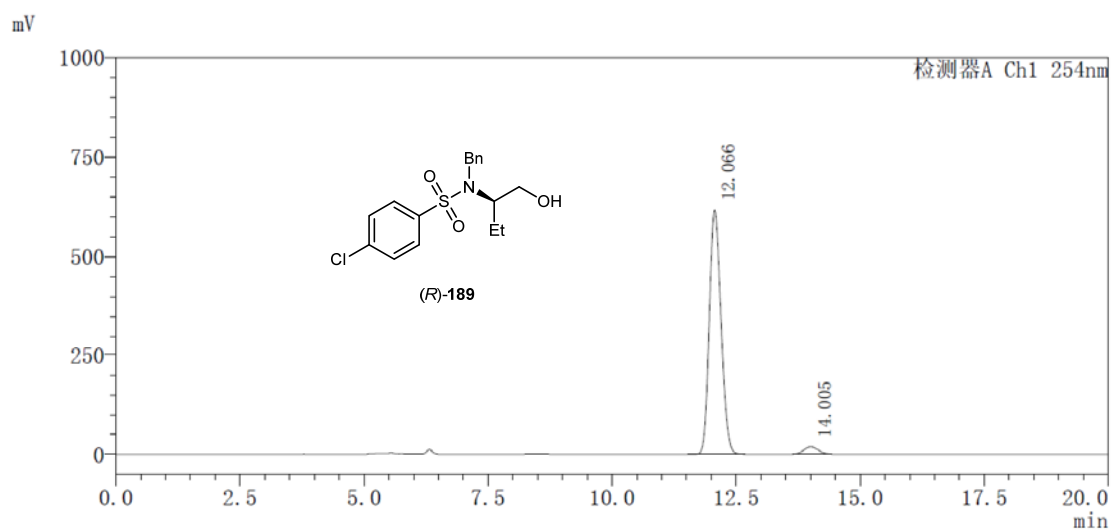

Peak Table

检测器A Ch1 254nm

| Peak# | Ret. Time | Area     | Area%  |
|-------|-----------|----------|--------|
| 1     | 12.066    | 10081095 | 96.259 |
| 2     | 14.005    | 391774   | 3.741  |



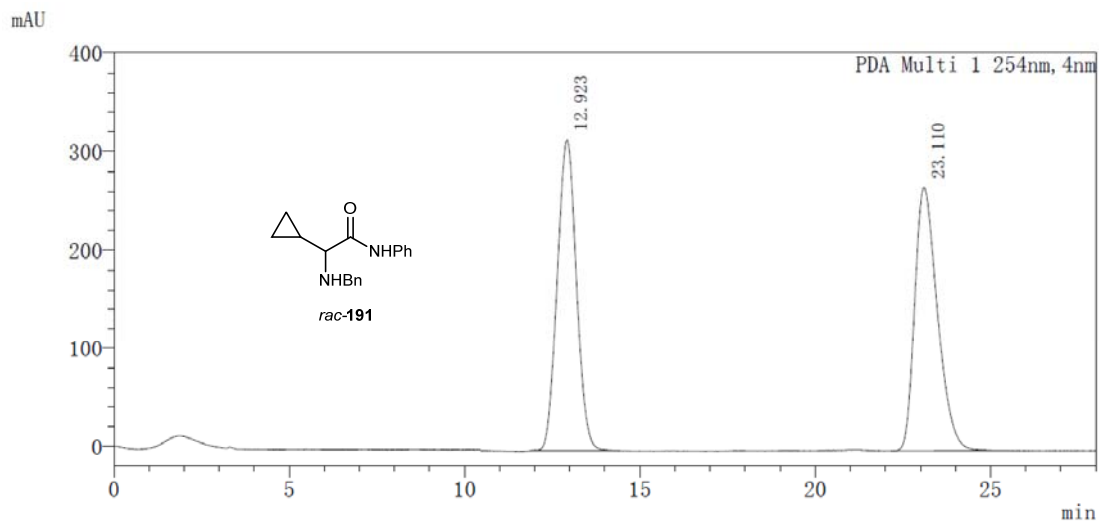

Peak Table

PDA Ch1 254nm

| Peak# | Ret. Time | Area     | Area%  |
|-------|-----------|----------|--------|
| 1     | 12.923    | 12063625 | 49.962 |
| 2     | 23.110    | 12082207 | 50.038 |

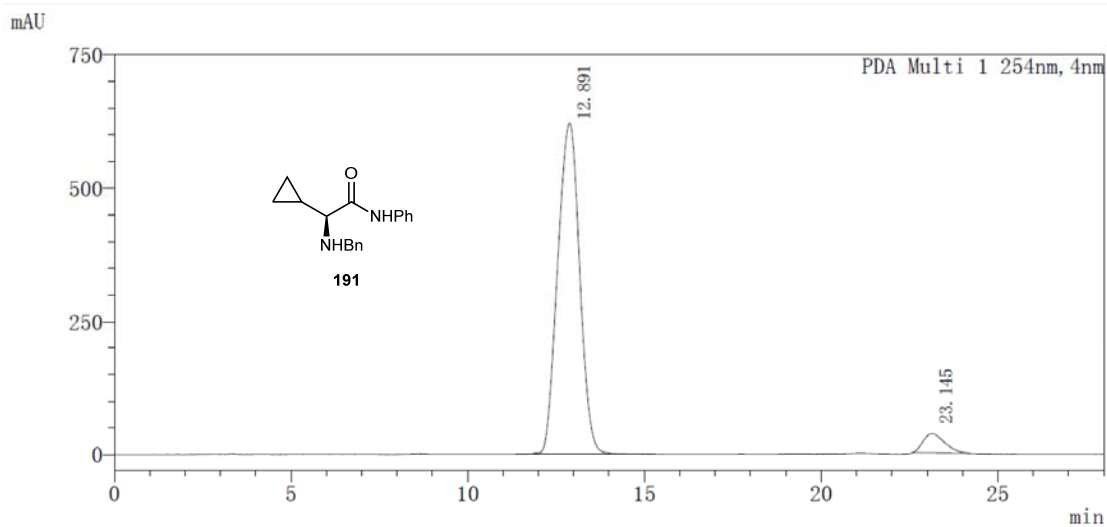

Peak Table

PDA Ch1 254nm

| Peak# | Ret. Time | Area     | Area%  |
|-------|-----------|----------|--------|
| 1     | 12.891    | 26879496 | 94.572 |
| 2     | 23.145    | 1542828  | 5.428  |
